# Supplementary material for: Controlling placental spheroid growth and phenotype using engineered synthetic hydrogel matrices
Source: Royal Society of Chemistry journal article supplement (doi:10.1039/d3bm01393f), 2024-01-01
Supplement: d3bm01393f1.pdf [file d3bm01393f1.pdf]

## Supporting Information

### Controlling placental spheroid growth and phenotype using engineered synthetic hydrogel matrices

Emily M. Slaby, Seema B. Plaisier, Sarah R. Brady, Shivani C. Hiremath, Jessica D. Weaver\*

**Table S1. Crosslinker and adhesion ligand sequences purchased from GenScript.**

| Peptide | Sequence                      | Description                                                                            |
|---------|-------------------------------|----------------------------------------------------------------------------------------|
| RGD     | GRGDSPC                       | Adhesive, fibronectin                                                                  |
| RDG     | GRDGSPC                       | Adhesive, scrambled fibronectin                                                        |
| GFOGER  | GGYGGGPP(GPP)5GFOGER(GPP)5GPC | Adhesive, collagen                                                                     |
| YIGSR   | CGGEGYGEGYIGSR                | Adhesive, laminin                                                                      |
| IKVAV   | CGQAASIKVAVSADR               | Adhesive, laminin                                                                      |
| VPM     | GCRDVPMSMRGGDRCG              | Crosslinker, degradable (MMP1, MMP2, MMP3, MMP7, MMP9, MT1-MMP/MMP14) <sup>72-74</sup> |
| GDQ     | GCRDGDQGIAGFDRCG              | Crosslinker, degradable (MMP1) <sup>73,75</sup>                                        |
| GPQ-W   | GCRDQGWIGQPGDRCG              | Crosslinker, degradable (MMP1, MMP2, MMP3, MMP8, MMP9, MMP12) <sup>73,76,77</sup>      |

**Table S2. Table of Proteomics Normalized Abundances** – available in Supporting Information

**Table S3. Table of Functional Annotation** – available in Supporting Information

**Table S4. Table of Proteins Identified in Proteomics Analysis** – available in Supporting Information

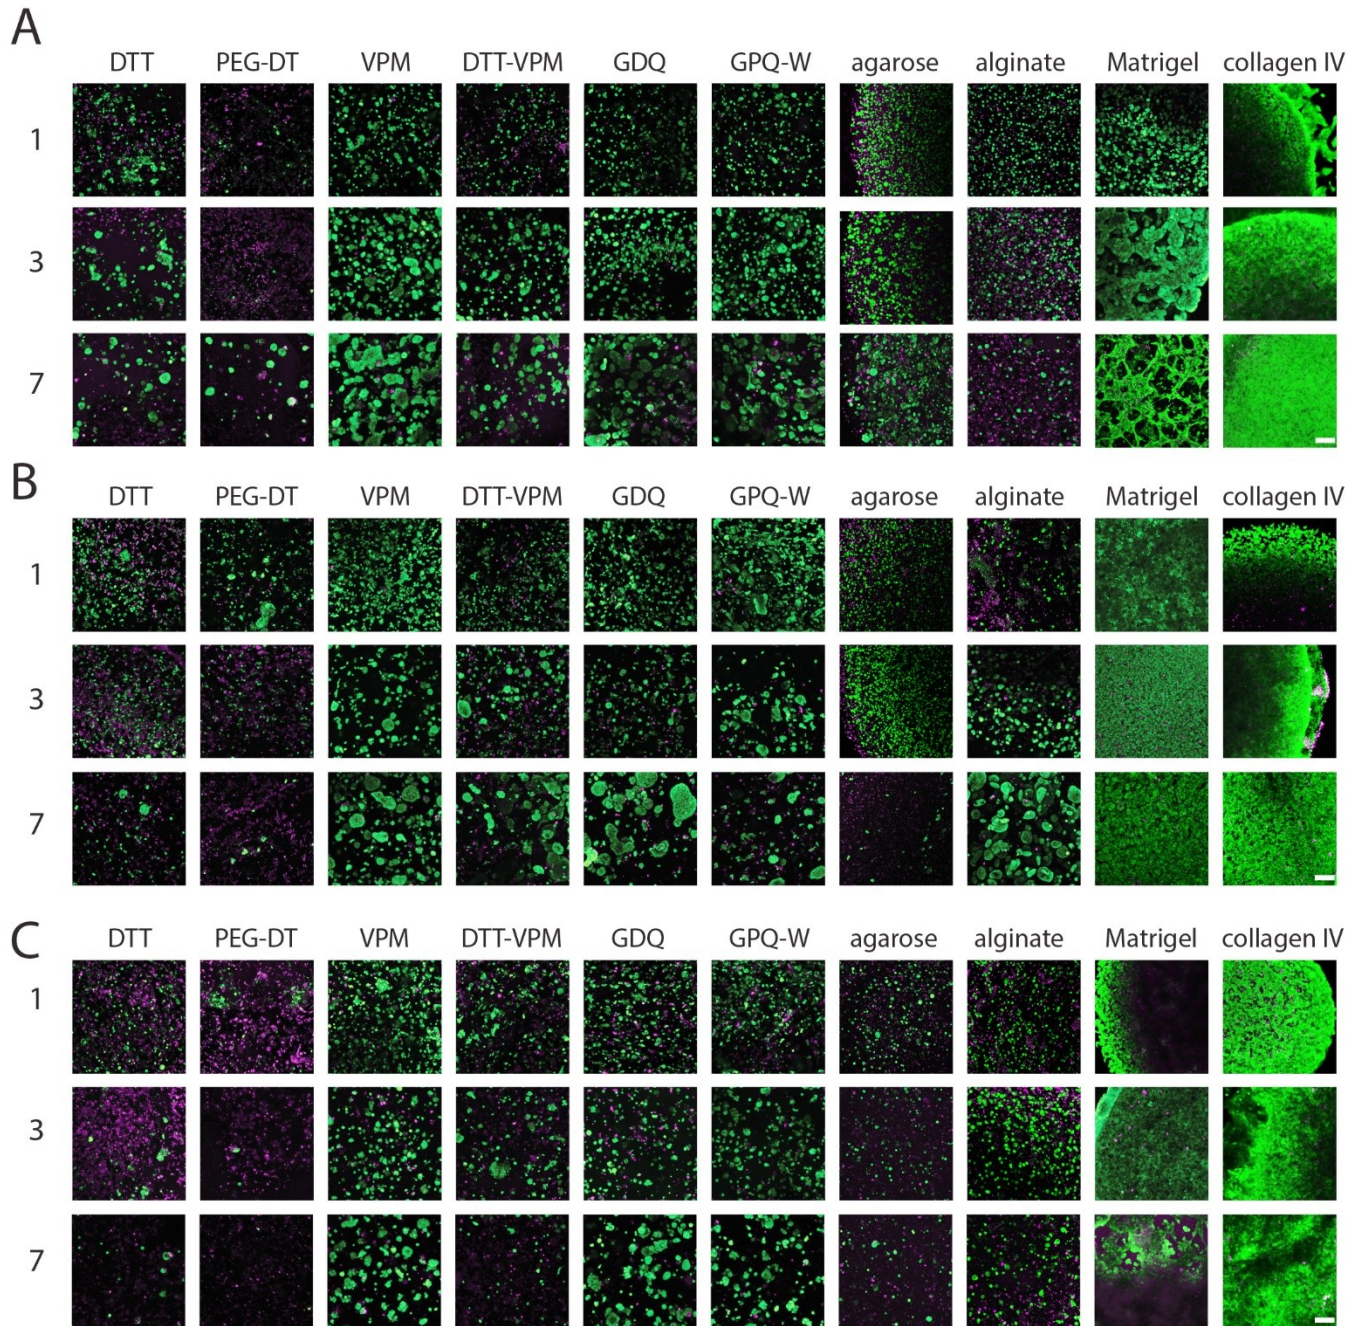

**Figure S1.** Cell viability and morphology through z-maximum projected confocal microscopy images (green – live, magenta – dead) of (A) JEG, (B) JAR, (C) BeWo viability over time on days 1, 3, and 7 cultured in PEG-RGD with varying crosslinkers or natural hydrogel controls. Scale bar = 200  $\mu\text{m}$ .

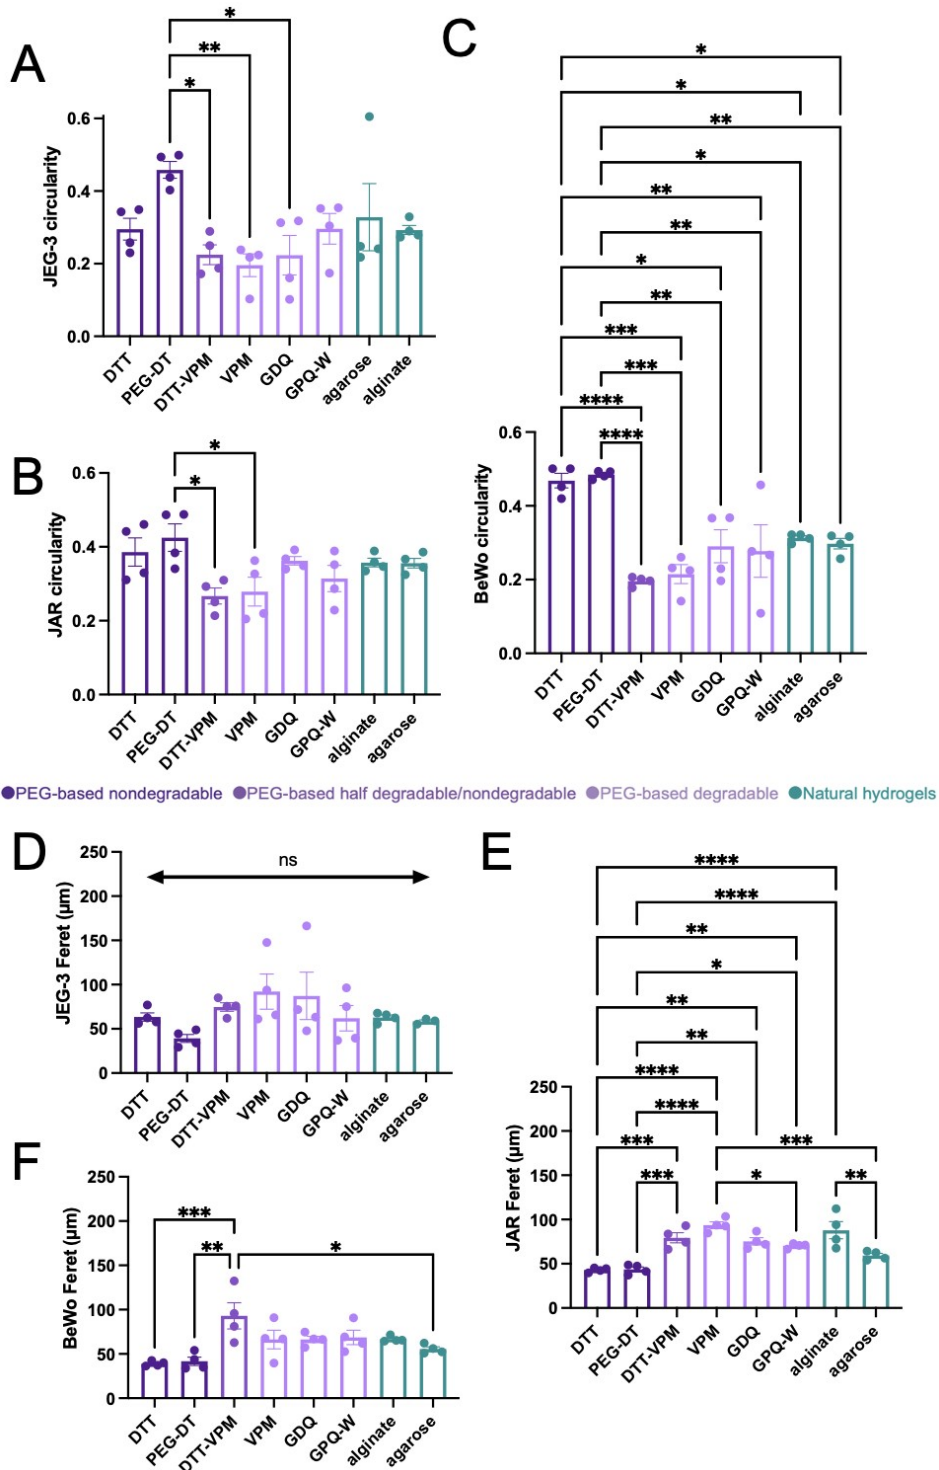

**Figure S2.** Cell morphology analysis of circularity (A-C) and feret diameter (D-F) on live z-maximum projected confocal microscopy images of (A, D) JEG-3, (B, E) JAR, and (C, F) BeWo cells on day 7 cultured in PEG-RGD with varying crosslinkers or natural hydrogel controls. Data is shown as mean  $\pm$  SEM. Analyzed by ordinary one-way ANOVA with Tukey's multiple comparisons test; ns = not significant, \*  $p < 0.05$ , \*\*  $p < 0.01$ , \*\*\*  $p < 0.001$ , \*\*\*\*  $p < 0.0001$ .

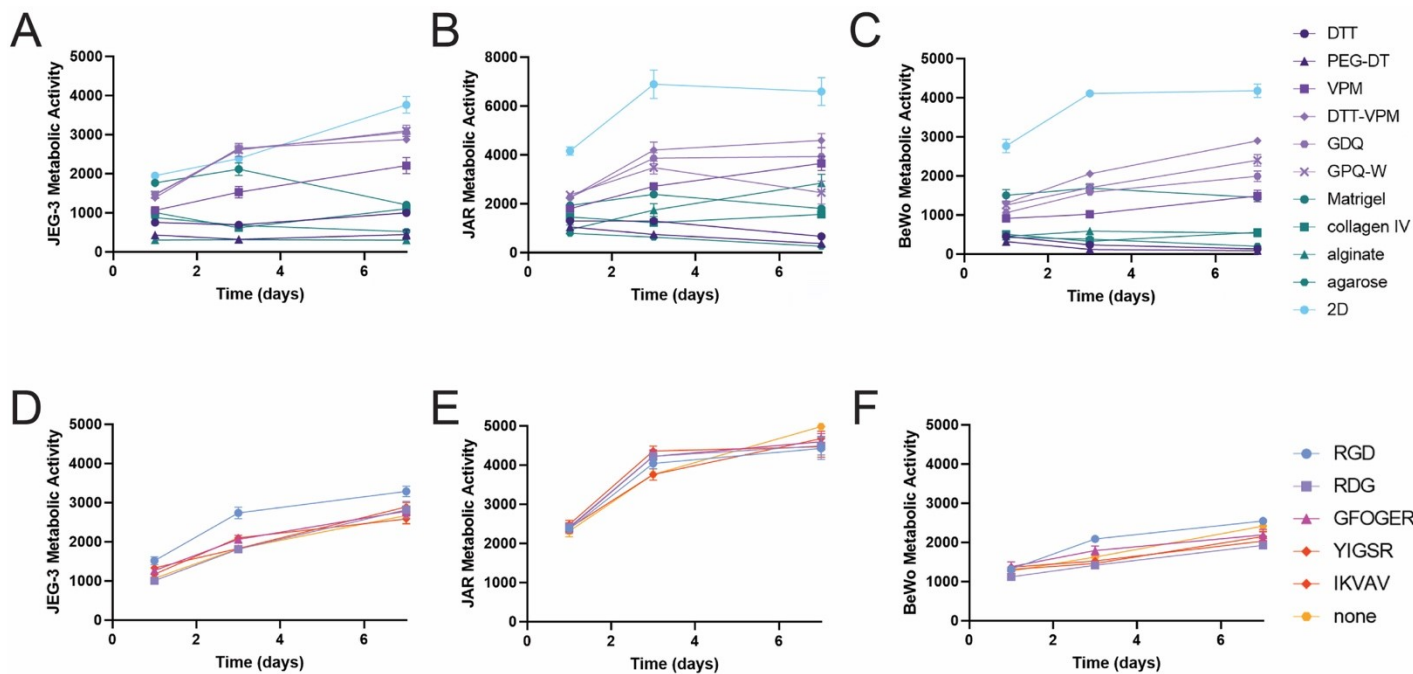

**Figure S3.** AlamarBlue metabolic activity over time in hydrogel controls and varying crosslinkers (A-C) or adhesion ligands (D-F) in JEG-3 (A, D), JAR (B, E), and BeWo (C, F) cell lines. Data is shown as mean  $\pm$  SEM.

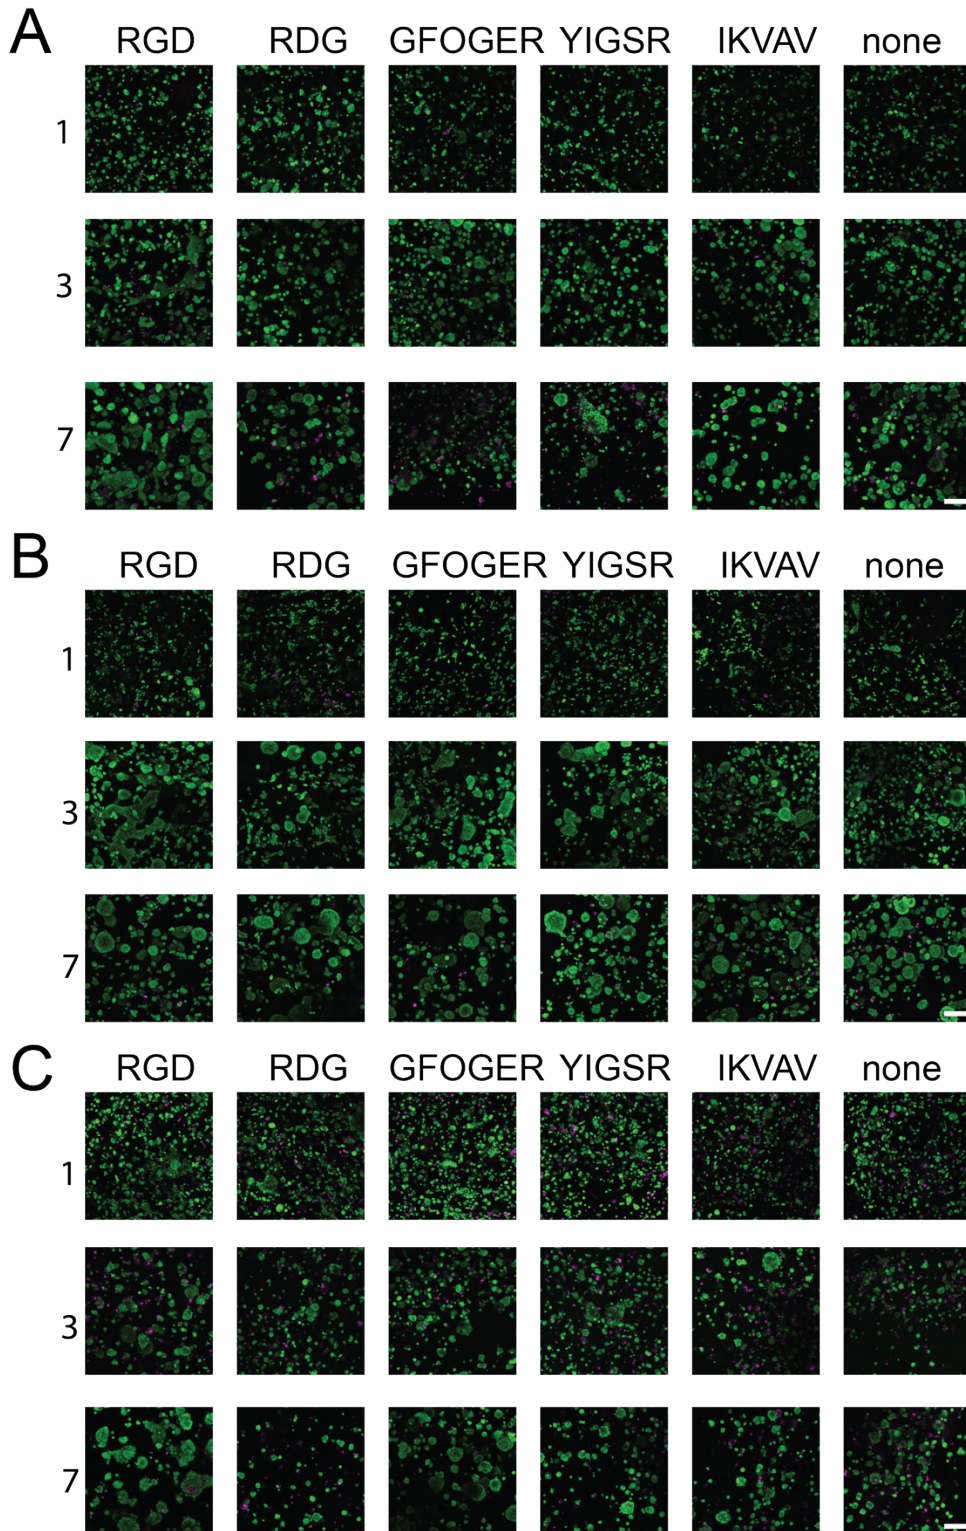

**Figure S4.** Cell viability and morphology through z-maximum projected confocal microscopy images (green – live, magenta – dead) of (A) JEG, (B) JAR, (C) BeWo viability over time on days 1, 3 and 7 with varying adhesion ligands. Scale bar = 200  $\mu\text{m}$ .

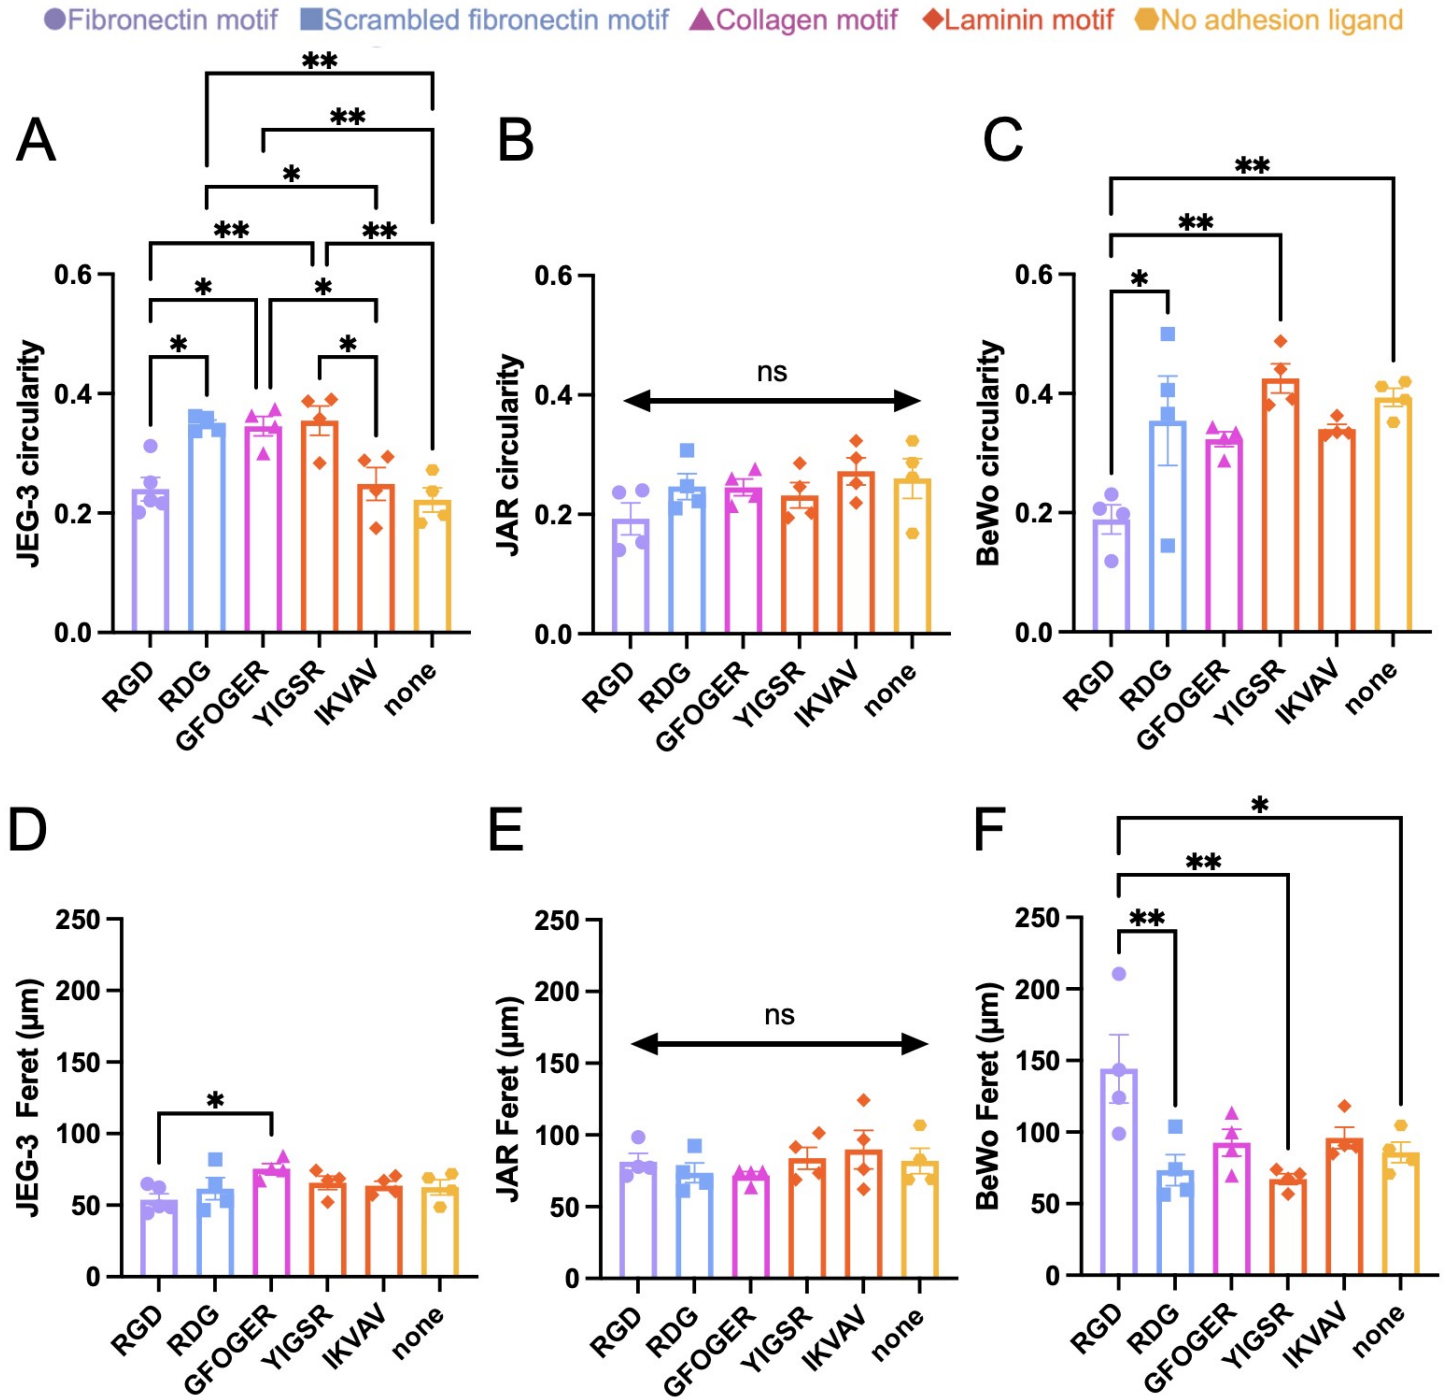

**Figure S5.** Cell morphology analysis of circularity (A-C) and feret diameter (D-F) on live z-maximum projected confocal microscopy images of (A, D) JEG, (B, E) JAR, and (C, F) BeWo cells on day 7 cultured in PEG-VPM with varying adhesive ligands or no adhesion ligand (“none”). Data is shown as mean  $\pm$  SEM. Analyzed by ordinary one-way ANOVA with Tukey’s multiple comparisons test; ns = not significant, \*  $p < 0.05$ , \*\*  $p < 0.01$ , \*\*\*  $p < 0.001$ , \*\*\*\*  $p < 0.0001$ .

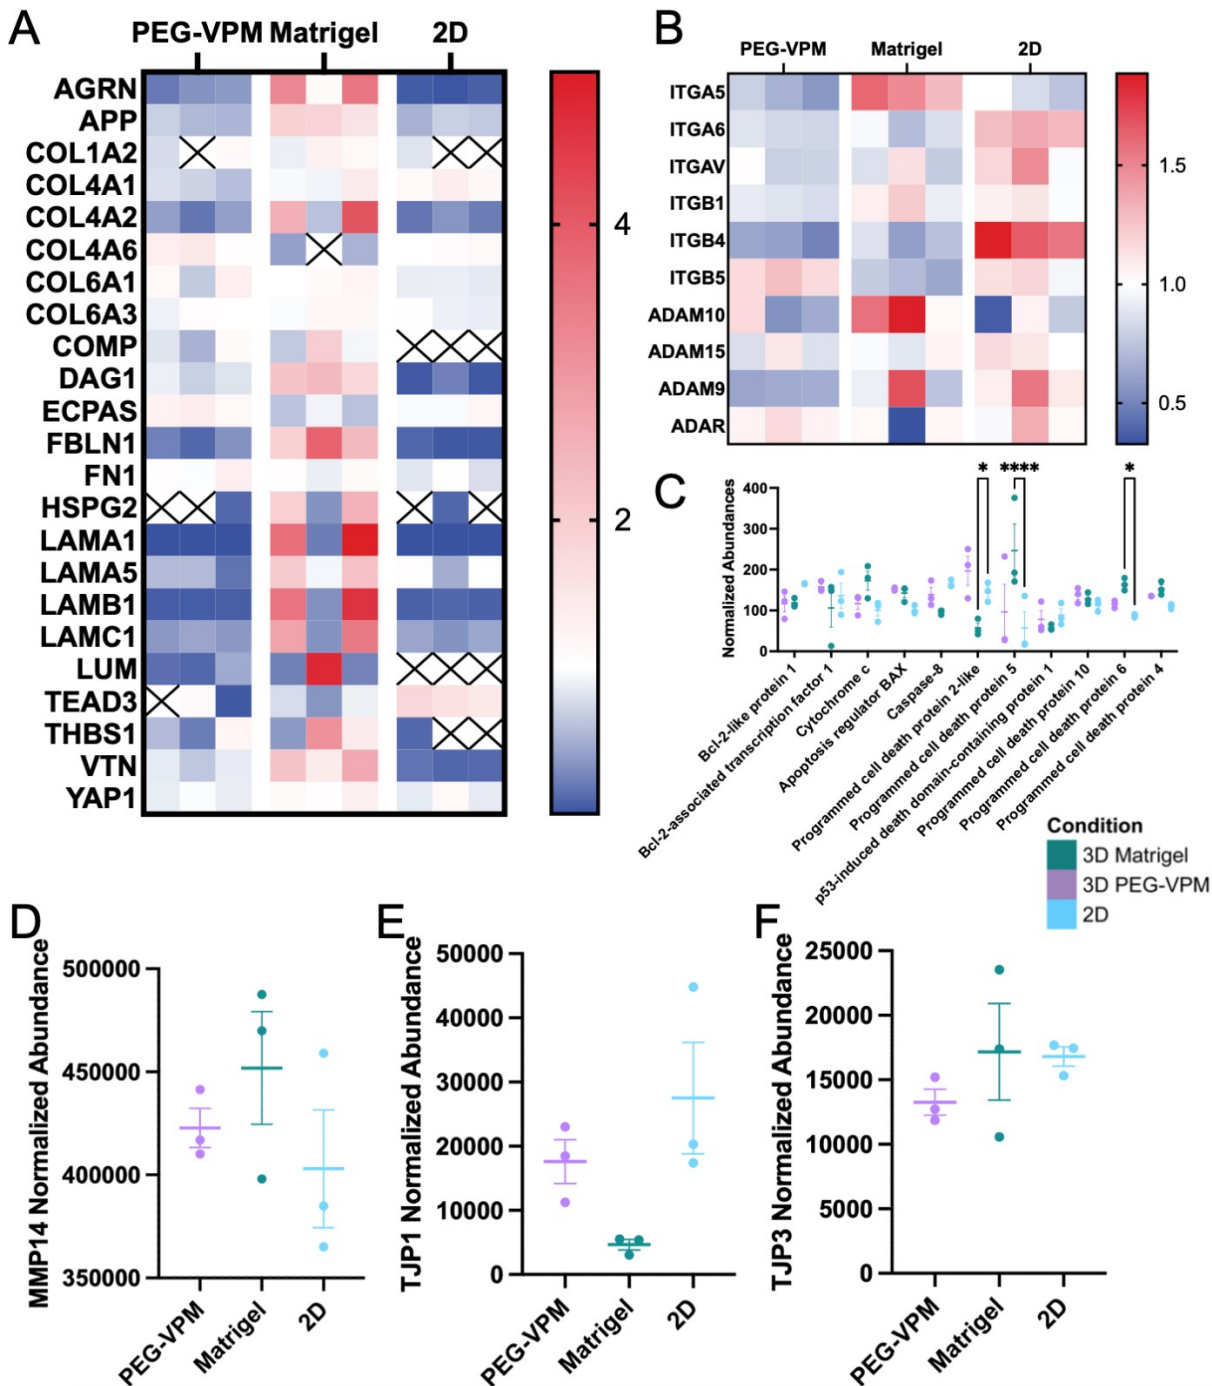

**Figure S6.** Normalized protein abundances of JAR cells cultured in PEG-VPM-RGD, Matrigel, or 2D from proteomic analysis. (A) ECM and structural integrity proteins, (B) integrins and disintegrin and metalloproteinase domain-containing proteins, (C) apoptosis-associated proteins, (D) MMP14, (E) Tight junction protein 1 (TJP1), and (F) Tight junction protein 3 (TJP3) normalized abundances. Data shown as mean  $\pm$  SEM. (C) Analyzed by two-way with Dunnett's multiple comparisons test to 2D or (D-F) one-way ANOVA with Tukey's multiple comparison test; \*  $p < 0.05$ , \*\*\*\*  $p < 0.0001$ .

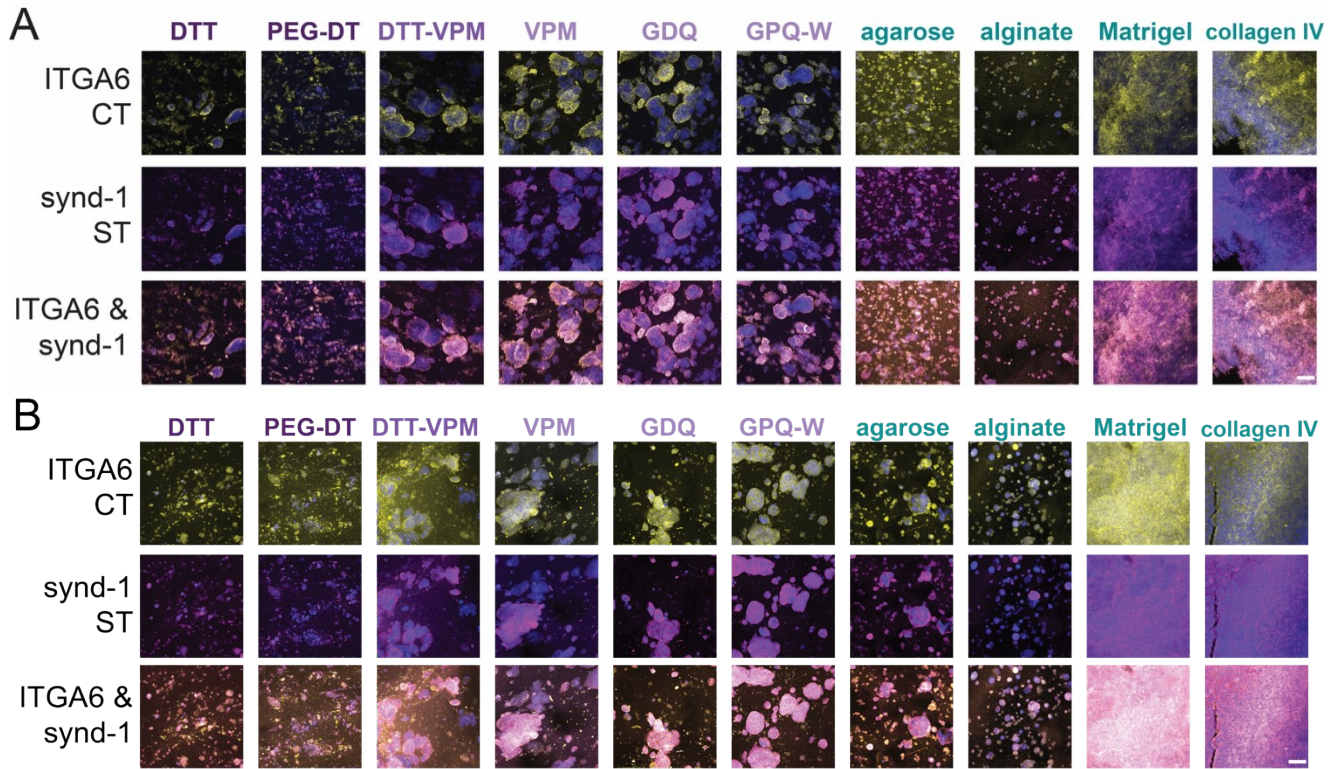

**Figure S7.** Impact of hydrogel degradability on trophoblast phenotype by surface markers. (A) JEG-3 and (B) BeWo stained with ITGA6 (yellow), synd-1 (magenta), and DAPI (blue) after culture in PEG-RGD hydrogels with varying crosslinkers or hydrogel controls for 7 days. Scale bar = 100  $\mu$ m.



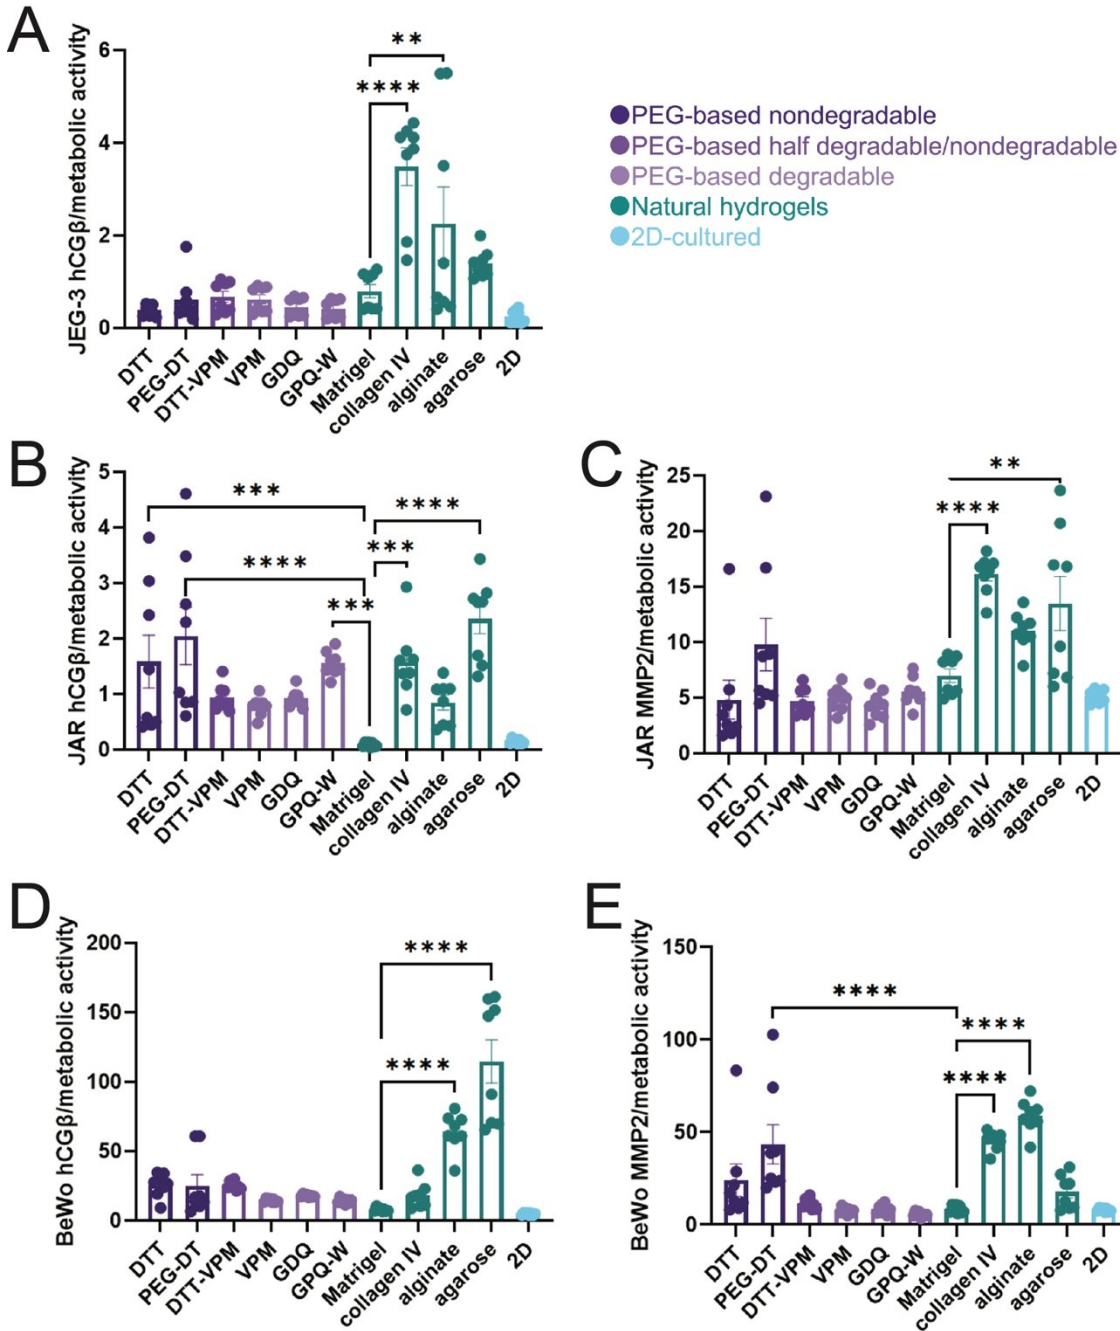

**Figure S8.** Cell line secretion on day 7 in various crosslinked PEG-RGD and control hydrogels normalized to metabolic activity. Secretion of (A, B, D) hCGβ and (C, E) MMP2 from (A) JEG-3, (B-C) JAR, and (D-E) BeWo cells normalized to the average metabolic activity of the cells in each condition on day 7. Data shown as mean  $\pm$  SEM. Analyzed by ordinary one-way ANOVA with Dunnett's multiple comparisons test compared to Matrigel; \*\*  $p < 0.01$ , \*\*\*  $p < 0.001$ , \*\*\*\*  $p < 0.0001$ .

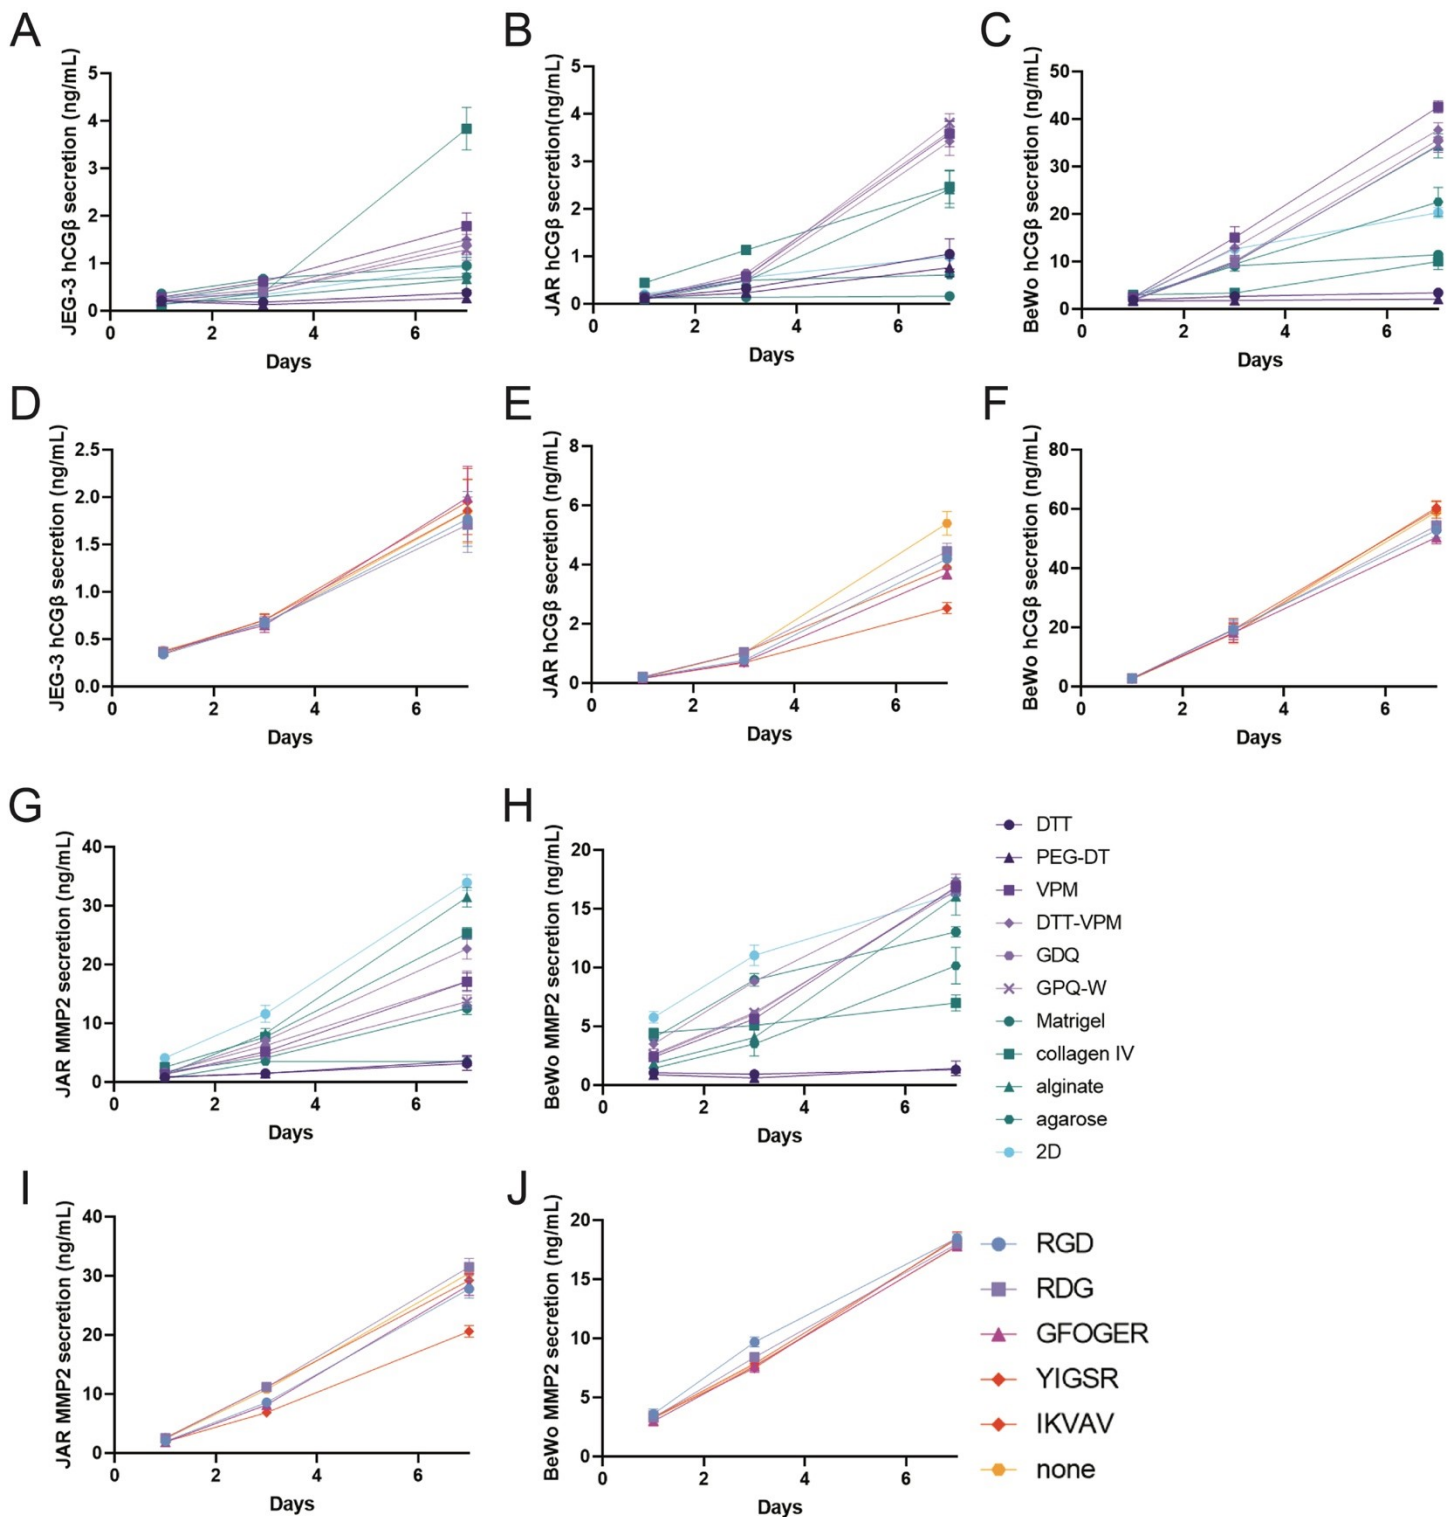

**Figure S9.** Secretion of (A-F) hCG $\beta$  and (G-J) MMP2 from JEG-3 (A, D), JAR (B, E, G, I), and BeWo (C, F, H, J) cell lines over time in hydrogels with varying crosslinked PEG-RGD hydrogels or controls (A-C, G-H) or degradable PEG-VPM hydrogels with varying adhesion ligands (D-F, I-J). Data shown as mean  $\pm$  SEM.

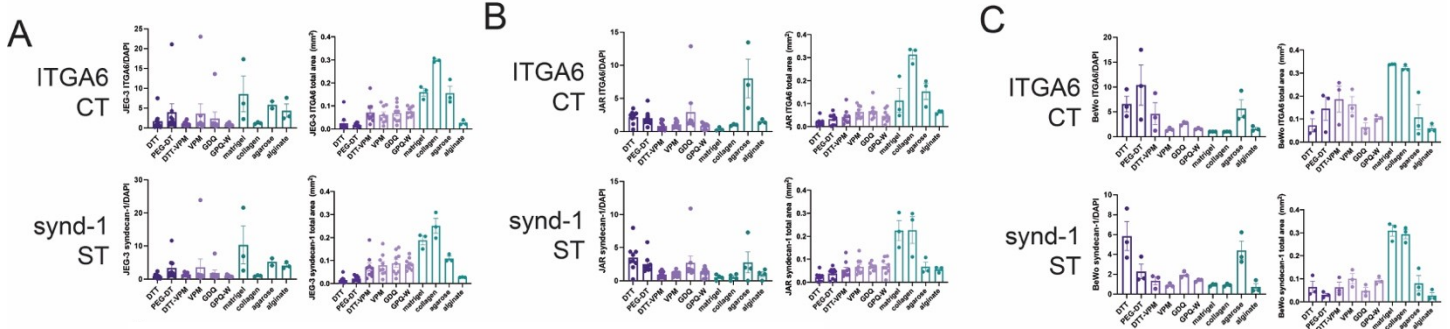

**Figure S10.** Image analysis of protein area expression data from Figure 5 and S5 of JEG-3 (A), JAR (B), and BeWo. (C) Total expression (right) of ITGA6 and syndecan-1 and normalized (left) to DAPI in PEG-RGD with various crosslinkers and natural hydrogel controls. Data shown as mean  $\pm$  SEM.

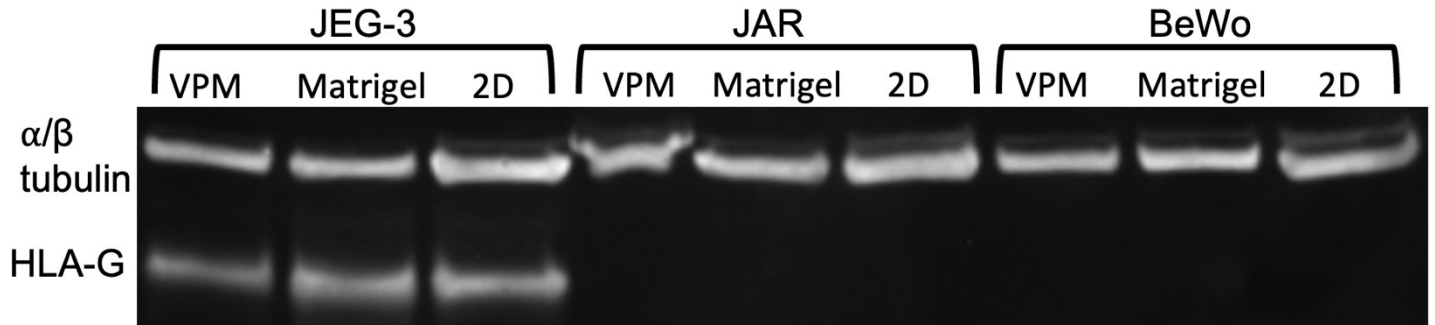

**Figure S11.** Western blot analysis of JEG-3, JAR, and BeWo cell lysates after culture in PEG-RGD-VPM ("VPM"), Matrigel, or 2D for 7 days and probed for HLA-G expression relating to the EVT subtype and  $\alpha/\beta$  tubulin housekeeping gene.

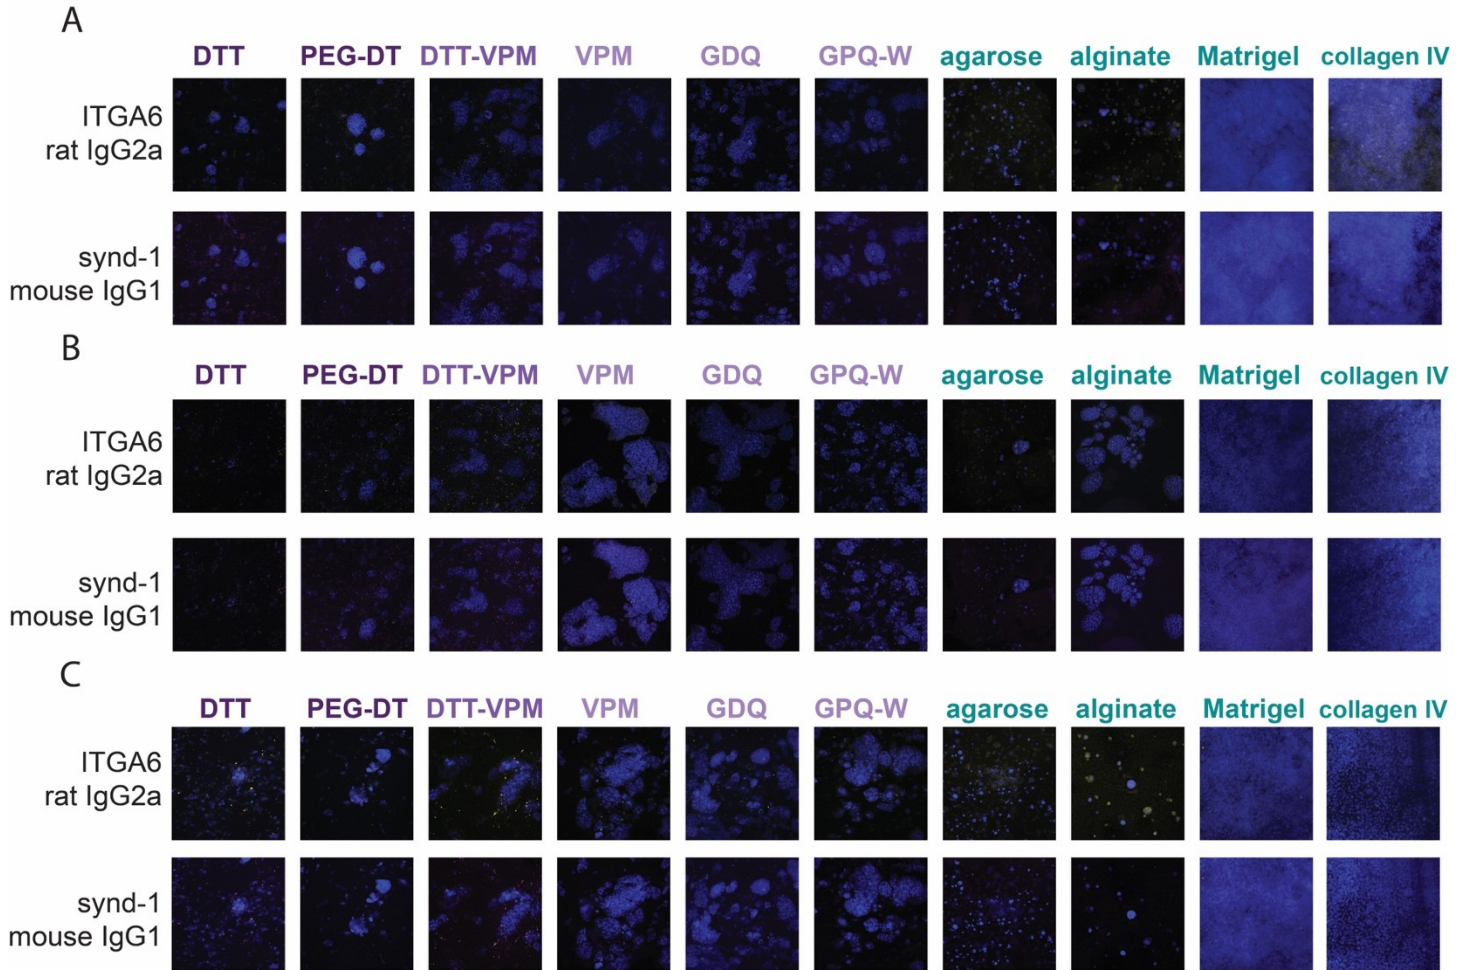

**Figure S12.** Isotype controls for data shown in Figure 5 and S5. (A) JEG-3, (B) JAR, and (C) BeWo stained with DAPI (blue) and isotype controls for ITGA6 (rat IgG2a - yellow) and syndecan-1 (mouse IgG1 - magenta) after culture in PEG-RGD hydrogels with varying crosslinkers or hydrogel controls for 7 days.

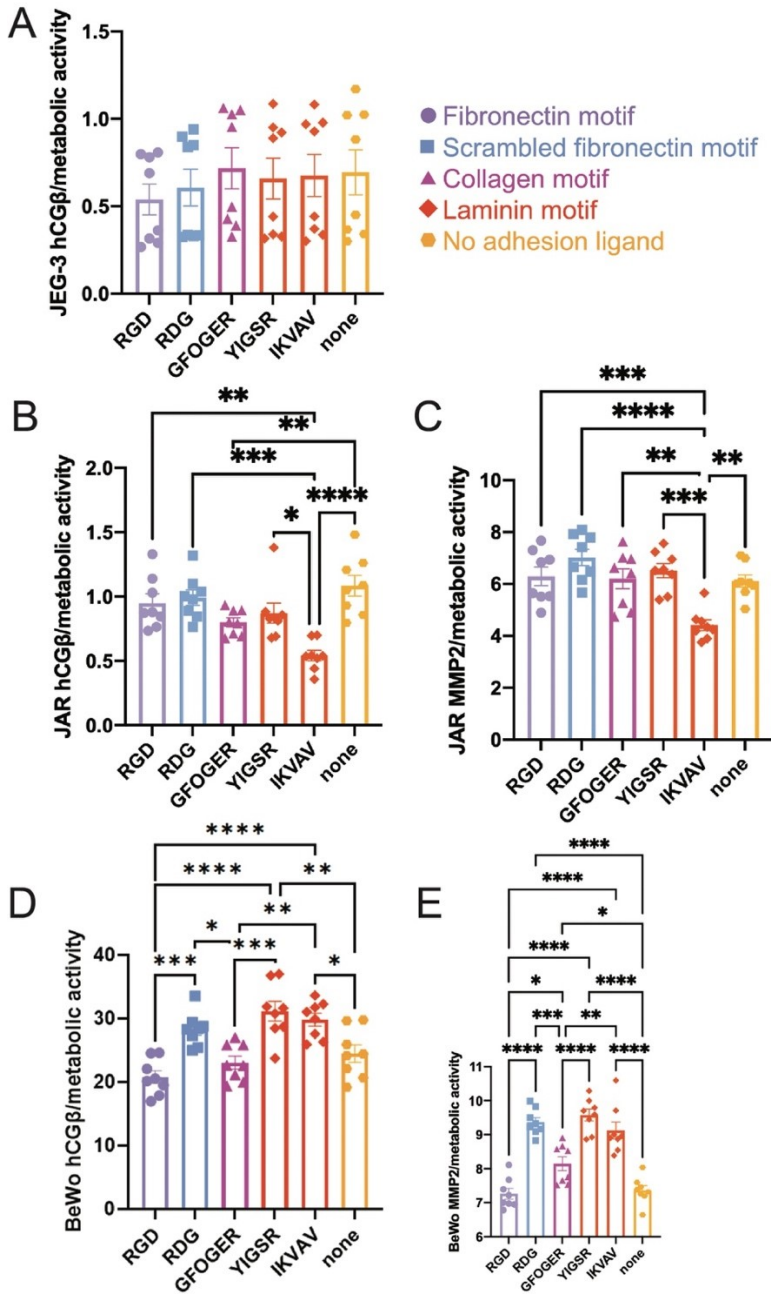

**Figure S13.** Cell line secretion on day 7 in degradable PEG-VPM hydrogels with varying adhesion ligands normalized to metabolic activity. Secretion of (A, B, D) hCG $\beta$  and (C, E) MMP2 from (A) JEG-3, (B-C) JAR, and (D-E) BeWo cells normalized to the average metabolic activity of the cells in each condition on day 7. Data shown as mean  $\pm$  SEM. Analyzed by ordinary one-way ANOVA with Tukey's multiple comparisons test; \*  $p < 0.05$ , \*\*  $p < 0.01$ , \*\*\*  $p < 0.001$ , \*\*\*\*  $p < 0.0001$ .

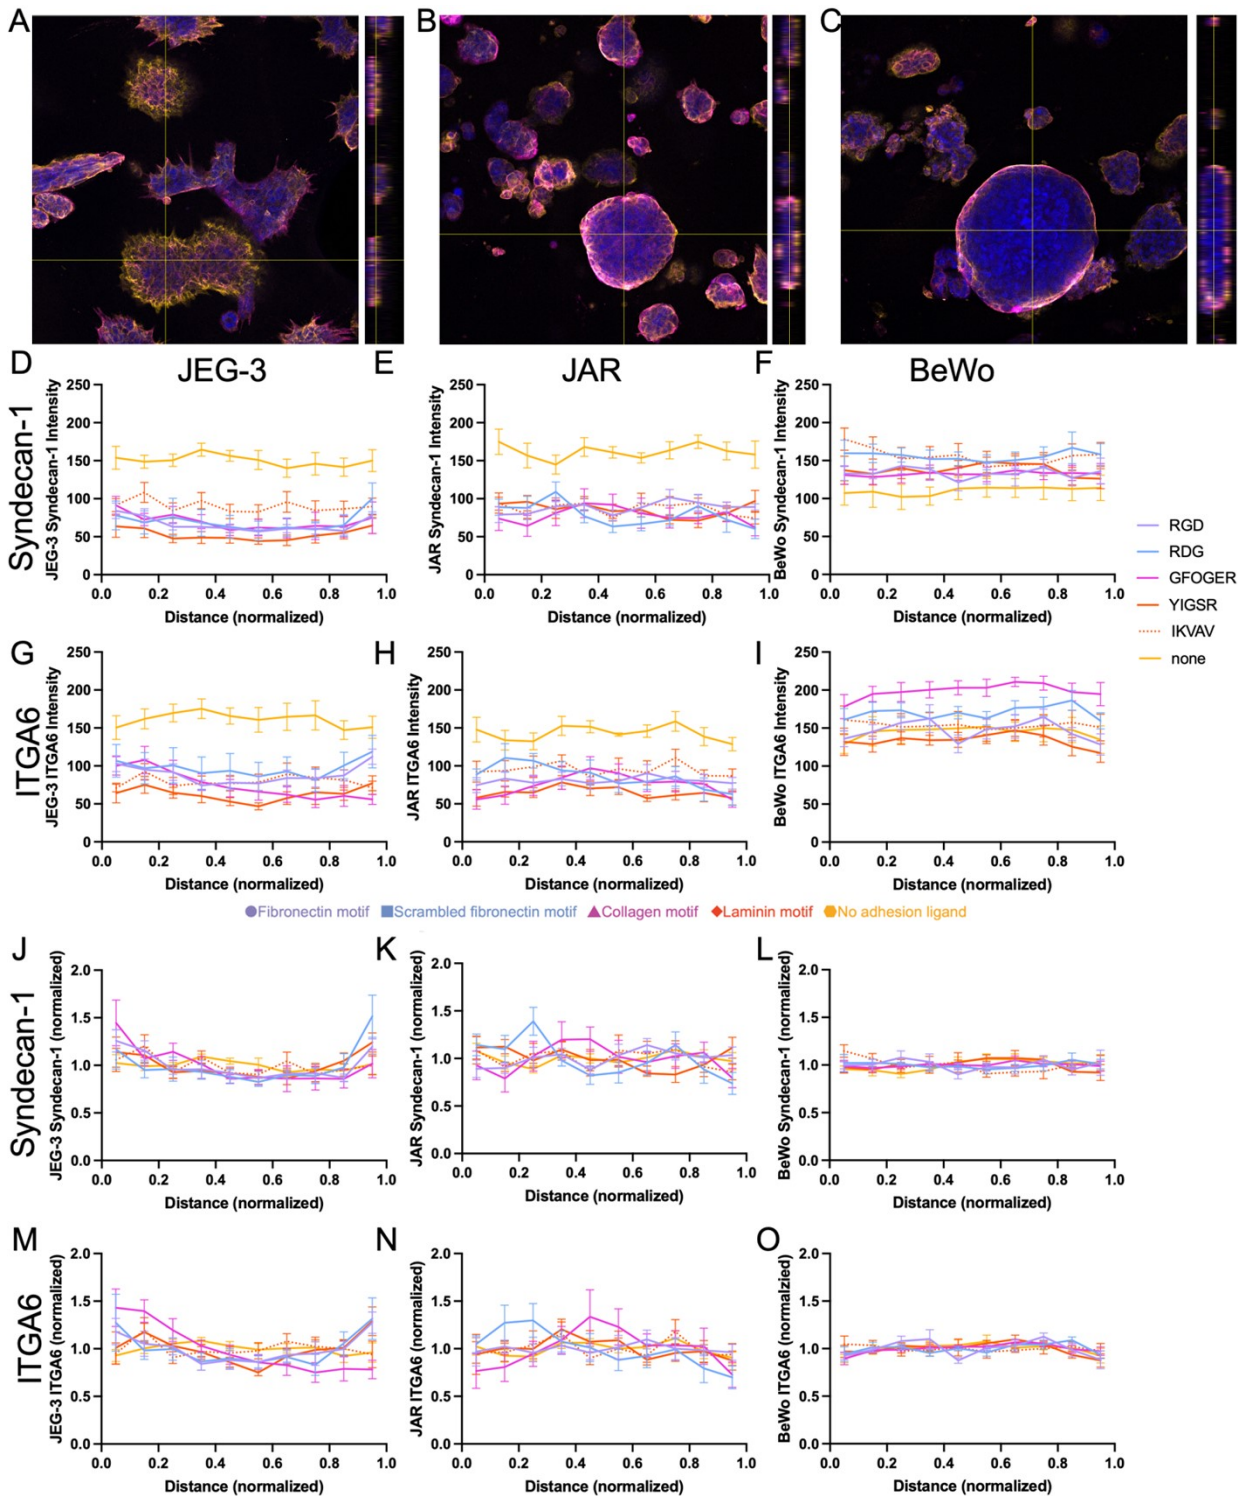

**Figure S14.** Distribution of select phenotypic markers across individual spheroids. (A-C) Orthogonal views of selected images of JEG-3 cultured in PEG-VPM (A) -RGD, (B) -GFOGER, and (C) -YIGSR stained with DAPI (blue), ITGA6 (yellow), and syndecan-1 (magenta). (D-O) Image analysis of syndecan-1 and ITGA6 intensity (D-I) and normalized (J-O) to the average intensity of each spheroid from n=7 spheroids within the respective images from Figure 6. Data shown as mean  $\pm$  SEM.

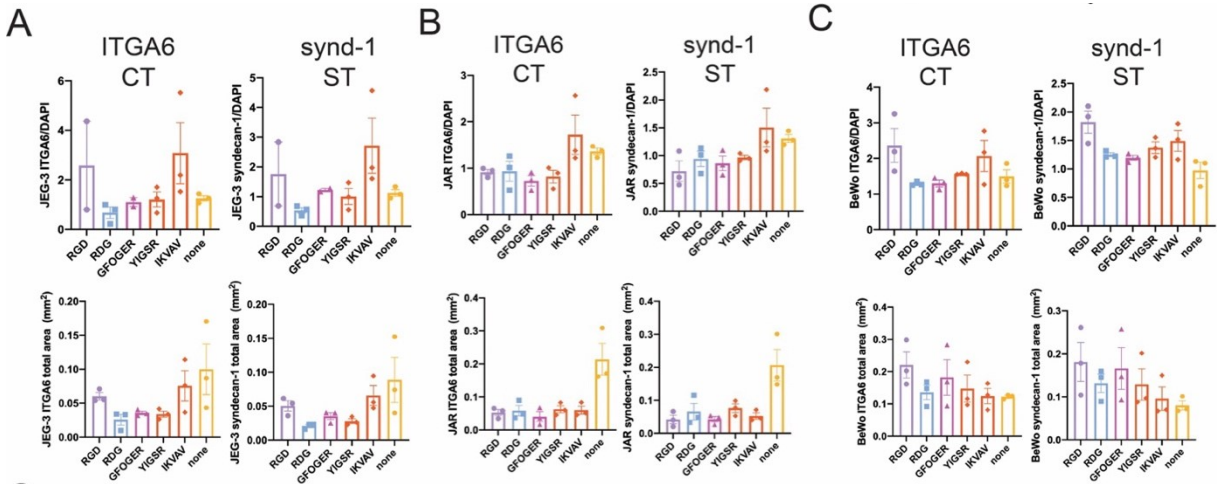

**Figure S15.** Image analysis of data from Figure 6 of JEG-3 (A), JAR (B), and BeWo (C) total area expression of ITGA6 and synd-1 (bottom) and normalized to DAPI (top) in PEG-VPM with various adhesive ligands. Data shown as mean  $\pm$  SEM.

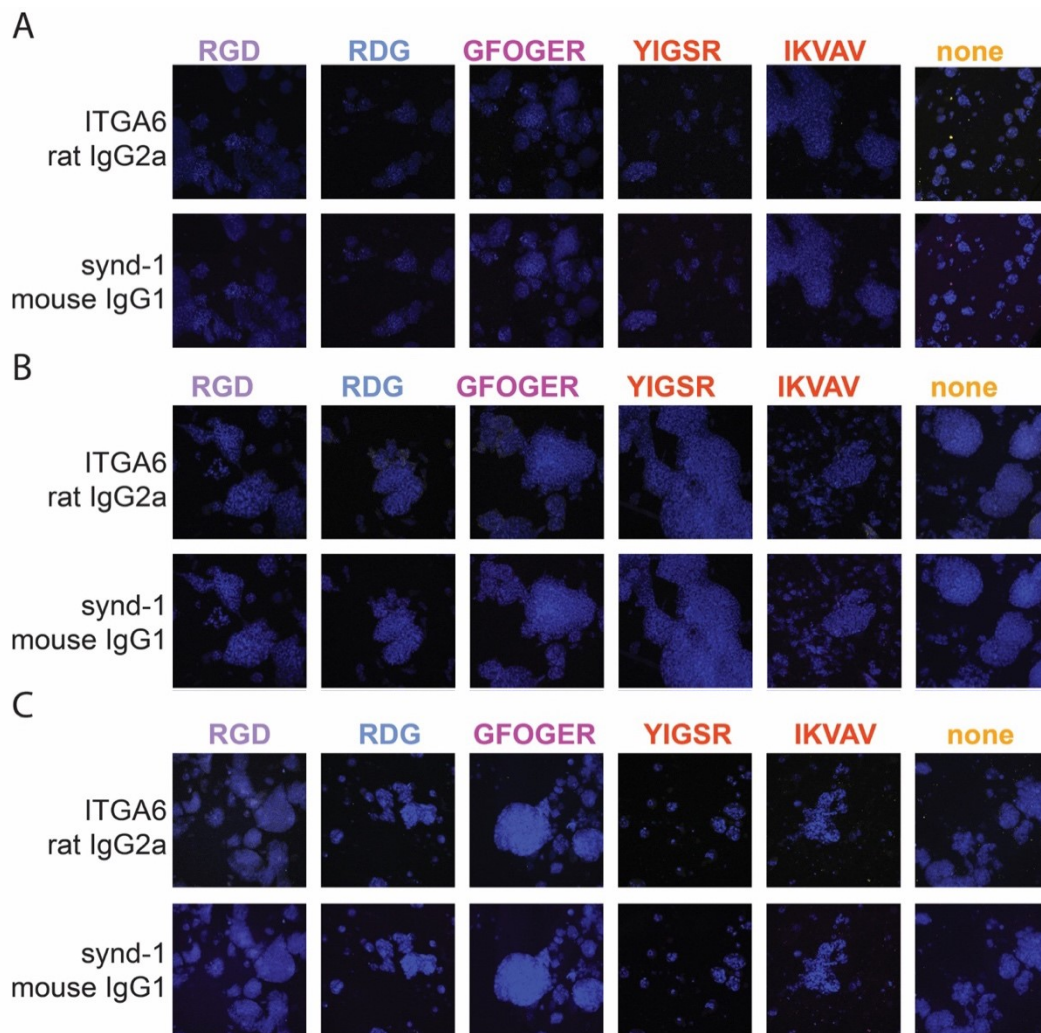

**Figure S16.** Isotype controls for data shown in Figure 6. (A) JEG-3, (B) JAR, and (C) BeWo stained with DAPI (blue) and isotype controls for ITGA6 (rat IgG2a - yellow) and syndecan-1 (mouse IgG1 - magenta) after culture in degradable PEG-VPM hydrogels with varying adhesion ligands for 7 days.
