# Supplementary material for: Controlling placental spheroid growth and phenotype using engineered synthetic hydrogel matrices
Source: Royal Society of Chemistry journal article supplement (doi:10.1039/d3bm01393f), 2024-01-01
Supplement: d3bm01393f2.xlsx [file d3bm01393f2.xlsx]

## Sheet: LFQ_NormalizedAbundance
Accession	Gene Symbol	Entrez Gene ID	Description	Biological Process	Syn2D_r1	Syn2D_r2	Syn2D_r3	Matrigel_r1	Matrigel_r2	Matrigel_r3	VPM_r1	VPM_r2	VPM_r3	mean_Syn2D	mean_Matrigel	mean_VPM	FC_Syn2DvsMatrigel	FC_VPMvsMatrigel	FC_Syn2DvsVPM	anova_pval	tukey_Matrigel_Syn2D_pval	tukey_Matrigel_VPM_pval	tukey_VPM_Syn2D_pval
P37268	FDFT1	2222	Squalene synthase [OS=Homo sapiens]	cellular homeostasis	381827	417531	373536	366545	367817	313449	309604	350043	325074	390965	349270	328240	1.11938	-1.06407	1.19109	0.0577039	0.135681	0.34856	0.0690985
Q13547	HDAC1	3065	Histone deacetylase 1 [OS=Homo sapiens]	cell growth;cell organization and biogenesis;cellular homeostasis;coagulation;defense response;metabolic process	476161	436163	447049	445359	207434	324455	534842	472197	439310	453124	325750	482117	1.39102	1.48002	-1.06398	0.0907065	0.124747	0.124747	0.653211
Q9P2X3	IMPACT	55364	Protein IMPACT [OS=Homo sapiens]	cell growth;coagulation;defense response;metabolic process	52789.6	57145.9	47649.4	45944.7	68533.7	47226.1	64232.9	66555.6	61363	52528.3	53901.5	64050.5	-1.02614	1.18829	-1.21935	0.233372	0.839768	0.254507	0.254507
Q9H8H0	NOL11	25926	Nucleolar protein 11 [OS=Homo sapiens]	cellular component movement;cellular homeostasis;metabolic process	12406.1	22171.5	13623	18692.5	4573.54	15766	22942	26997.2	22692.9	16066.9	13010.7	24210.7	1.2349	1.86083	-1.50687	0.104789	0.519171	0.137946	0.176907
P50750	CDK9	1025	Cyclin-dependent kinase 9 [OS=Homo sapiens]	cell differentiation;cell organization and biogenesis;cell proliferation;cellular component movement;cellular homeostasis;coagulation;metabolic process	77877.2	96811.8	73236.8	70208.5	48641.8	62057	85896.2	79226.5	88465.5	82641.9	60302.5	84529.4	1.37046	1.40176	-1.02284	0.0440086	0.050044	0.050044	0.824094
Q5SRE5	NUP188	23511	Nucleoporin NUP188 [OS=Homo sapiens]	conjugation	14677.8	37982.9	24101.5	17761.4	1691.14	41474	29046	48123.8	48509.1	25587.4	20308.8	41893	1.25991	2.0628	-1.63725	0.256487	0.678587	0.34105	0.34105
P49902	NT5C2	22978	Cytosolic purine 5'-nucleotidase [OS=Homo sapiens]	cellular homeostasis	98653.1	176840	139173	182363	100417	145295	155107	188314	162920	138222	142691	168781	-1.03233	1.18284	-1.22108	0.53407	0.878188	0.579834	0.579834
P29084	GTF2E2	2961	Transcription initiation factor IIE subunit beta [OS=Homo sapiens]	cellular component movement;cellular homeostasis	17920.5	17057.8	12695.7	12474.8	13991	4798.42	6046.84	14242.6	11051.7	15891.3	10421.4	10447.1	1.52487	1.00246	1.52113	0.241734	0.226139	0.994062	0.226139
O00401	WASL	8976	Neural Wiskott-Aldrich syndrome protein [OS=Homo sapiens]	cell differentiation;cell growth;conjugation;defense response;metabolic process	56865.5	73677.7	59704.7	40123.5	57058.9	26969.6	60126.1	64161.8	57019.5	63416	41384	60435.8	1.53238	1.46037	1.04931	0.0786657	0.0975551	0.0975551	0.736395
Q9Y3C1	NOP16	51491	Nucleolar protein 16 [OS=Homo sapiens]	metabolic process	21070.2	50027.7	41569.5	32612	17400.1	33365.7	43762	43607.6	43164.2	37555.8	27792.6	43511.3	1.35129	1.56557	-1.15858	0.233637	0.418548	0.311644	0.495272
P49959	MRE11	4361	Double-strand break repair protein MRE11 [OS=Homo sapiens]	cell differentiation;cell growth;cell proliferation;cellular homeostasis;coagulation;development;metabolic process	108624	127846	109404	77177.4	55444.4	75764.4	97741.2	94964.2	97596	115292	69462	96767.1	1.65978	1.39309	1.19143	0.00299873	0.00307431	0.0184689	0.0534884
Q8N1G2	CMTR1	23070	Cap-specific mRNA (nucleoside-2'-O-)-methyltransferase 1 [OS=Homo sapiens]	cellular component movement;cellular homeostasis	32636.9	32662.4	29941.7	25159.4	20459.4	24108.6	37055	35058.6	32456.1	31747	23242.5	34856.6	1.36591	1.49969	-1.09795	0.00145193	0.00428573	0.00171593	0.126662
Q8WX92	NELFB	25920	Negative elongation factor B [OS=Homo sapiens]	cell differentiation;metabolic process	130744	162763	138202	87854.9	77990.5	67055.4	135333	115116	114808	143903	77633.6	121752	1.85361	1.56829	1.18193	0.00239383	0.00260276	0.00979997	0.0866836
O43252	PAPSS1	9061	Bifunctional 3'-phosphoadenosine 5'-phosphosulfate synthase 1 [OS=Homo sapiens]	cellular homeostasis;defense response	649909	1.14544e+06	673192	825108	834550	692593	649042	620636	579623	822846	784084	616434	1.04944	-1.27197	1.33485	0.348281	0.788239	0.405099	0.405099
Q9C0C4	SEMA4C	54910	Semaphorin-4C [OS=Homo sapiens]	cell growth;defense response;development;metabolic process	21976	15805.5	17978.2	10520.6	13917.6	10722.4	58945.1	67309.9	43489.3	18586.6	11720.2	56581.4	1.58586	4.8277	-3.04421	0.000581036	0.292604	0.000849142	0.00104366
Q96C86	DCPS	28960	m7GpppX diphosphatase [OS=Homo sapiens]	cellular component movement;cellular homeostasis;metabolic process	353012	393154	316505	374729	435386	349909	379103	398097	345362	354224	386675	374187	-1.09161	-1.03337	-1.05636	0.58564	0.694065	0.694065	0.694065
Q86W42	THOC6	79228	THO complex subunit 6 homolog [OS=Homo sapiens]	cellular component movement;cellular homeostasis;conjugation;defense response;metabolic process	102747	154888	124686	102380	11845.6	111027	143992	144816	106295	127440	75084	131701	1.6973	1.75404	-1.03343	0.199228	0.20539	0.20539	0.893498
P43897	TSFM	10102	Elongation factor Ts, mitochondrial [OS=Homo sapiens]	cell organization and biogenesis;cellular homeostasis;metabolic process	143460	170108	179633	22867.7	17643.7	40691.4	68515.3	122451	73060.4	164400	27067.6	88009	6.0737	3.25145	1.868	0.000711526	0.000698748	0.0133951	0.00729148
Q9H6T0	ESRP2	80004	Epithelial splicing regulatory protein 2 [OS=Homo sapiens]	cellular component movement;cellular homeostasis;defense response;metabolic process	260679	267594	213092	247067	278160	245264	314372	258457	287908	247121	256830	286912	-1.03929	1.11713	-1.16102	0.225029	0.661732	0.305971	0.305971
P62306	SNRPF	6636	Small nuclear ribonucleoprotein F [OS=Homo sapiens]	cell growth;cellular component movement;cellular homeostasis	43771	52151	81664.2	50887.2	30438	108773	78723.1	60573.9	45129.2	59195.4	63365.9	61475.4	-1.07045	-1.03075	-1.03852	0.983341	0.936485	0.936485	0.936485
P23258	TUBG1	7283	Tubulin gamma-1 chain [OS=Homo sapiens]	cell differentiation;cell growth	57411.9	83056.2	74217.3	29023.8	23864.7	21162.3	74807.7	62193.2	53204.6	71561.8	24683.6	63401.8	2.89917	2.56858	1.1287	0.0026776	0.00375005	0.00491129	0.358719
Q9H0R8	GABARAPL1	23710	Gamma-aminobutyric acid receptor-associated protein-like 1 [OS=Homo sapiens]	cell growth;cellular homeostasis;coagulation	9958.44	6828.54	7989.13	7618.45	7632.42	8021.15	12543	12283.5	7303.93	8258.7	7757.34	10710.1	1.06463	1.38065	-1.29683	0.216908	0.762166	0.25862	0.25862
Q8NBQ5	HSD17B11	51170	Estradiol 17-beta-dehydrogenase 11 [OS=Homo sapiens]	cellular homeostasis	35770.3	39932.7	39005.8	35599.7	32255.8	27394	23516	27063.6	27010.6	38236.3	31749.8	25863.4	1.2043	-1.2276	1.47839	0.00624372	0.0496555	0.0496555	0.00632142
Q8N3C0	ASCC3	10973	Activating signal cointegrator 1 complex subunit 3 [OS=Homo sapiens]	cell differentiation;cell growth;cell proliferation;cellular homeostasis;coagulation	25569.8	57604.1	25572.8	16897	9402.4	10187.4	34575.9	15368.8	40779	36248.9	12162.3	30241.2	2.98044	2.48648	1.19866	0.149967	0.207414	0.222334	0.601385
Q9BRP1	PDCD2L	84306	Programmed cell death protein 2-like [OS=Homo sapiens]	cell differentiation	9885.17	11257.2	8104.44	2803.15	3405.04	5341.37	14130.2	16753.4	8697.16	9748.95	3849.85	13193.6	2.53229	3.42704	-1.35333	0.0138066	0.0518543	0.0150989	0.163113
Q96E11	MRRF	92399	Ribosome-recycling factor, mitochondrial [OS=Homo sapiens]	cell growth;cell organization and biogenesis;cellular homeostasis	96355.6	116490	135842	63337.4	102294	84048.5	111337	100008	76818.3	116229	83226.7	96054.3	1.39654	1.15413	1.21004	0.180546	0.231332	0.439219	0.360676
Q9UBI6	GNG12	55970	Guanine nucleotide-binding protein G(I)/G(S)/G(O) subunit gamma-12 [OS=Homo sapiens]	defense response;development;metabolic process	19328.8	34081.2	26955.5	27122.5	45961.1	67229.4	43835.1	42575.3	37555.7	26788.5	46771	41322	-1.74594	-1.13187	-1.54253	0.209456	0.293395	0.612369	0.30606
Q08378	GOLGA3	2802	Golgin subfamily A member 3 [OS=Homo sapiens]	metabolic process	104693	98863.5	122357	77168.4	87987.9	92184.9	124097	124147	111048	108638	85780.4	119764	1.26647	1.39617	-1.10241	0.0119241	0.0374695	0.013491	0.198507
Q5RKV6	EXOSC6	118460	Exosome complex component MTR3 [OS=Homo sapiens]	cell proliferation;cellular component movement;cellular homeostasis;defense response;metabolic process	66783.9	76509.8	81010.9	53645.7	33788.1	80986.1	107066	99684.1	74898.5	74768.2	56140	93883	1.33182	1.6723	-1.25565	0.0952972	0.235461	0.110898	0.235461
Q9UKZ1	CNOT11	55571	CCR4-NOT transcription complex subunit 11 [OS=Homo sapiens]	metabolic process	59342.7	59938.4	73138	42601.2	28656.8	29980.1	58524.2	67333	53209.9	64139.7	33746	59689.1	1.90066	1.76877	1.07456	0.0053198	0.00788066	0.00844258	0.497398
Q16595	FXN	2395	Frataxin, mitochondrial [OS=Homo sapiens]	cell growth;cell organization and biogenesis;cellular homeostasis;coagulation;conjugation;defense response;metabolic process	25401.2	31643.3	24014.8	32072.2	50701.5	44764.2	28690.1	40681.2	23193.9	27019.8	42512.7	30855.1	-1.57339	-1.37782	-1.14194	0.117059	0.159217	0.180867	0.573653
Q99757	TXN2	25828	Thioredoxin, mitochondrial [OS=Homo sapiens]	cellular homeostasis;coagulation;metabolic process	45590.5	38016.3	44532.8	33579.9	39589.8	34811	42767.2	44669.9	37910.7	42713.2	35993.6	41782.6	1.18669	1.16084	1.02227	0.121632	0.145504	0.145504	0.762783
Q99570	PIK3R4	30849	Phosphoinositide 3-kinase regulatory subunit 4 [OS=Homo sapiens]	cell organization and biogenesis;cellular homeostasis;coagulation;conjugation;metabolic process	22687.1	15925.1	18818.3	10744.4	13440.7	5386.5	18966.8	15259.6	17737.6	19143.5	9857.21	17321.4	1.94208	1.75723	1.1052	0.0283885	0.0390127	0.0464917	0.519186
Q9Y303	AMDHD2	51005	N-acetylglucosamine-6-phosphate deacetylase [OS=Homo sapiens]	cellular homeostasis	39030	47449	36073.4	18056.9	29639.5	36615.7	58059.3	63625.3	44972.1	40850.8	28104	55552.2	1.45356	1.97666	-1.35988	0.020738	0.114322	0.0219388	0.114322
Q9HCE1	MOV10	4343	Helicase MOV-10 [OS=Homo sapiens]	coagulation;metabolic process	57654.4	53893.5	74211	14978.1	31350.9	7949.95	46516.7	43082.1	47245.8	61919.6	18093	45614.8	3.4223	2.52113	1.35744	0.00358369	0.00377813	0.0174669	0.0781926
Q8N3F8	MICALL1	85377	MICAL-like protein 1 [OS=Homo sapiens]	cell growth;conjugation;defense response;metabolic process	194088	192294	164771	105852	112193	66223.9	160747	162906	148726	183718	94756.3	157460	1.93885	1.66173	1.16676	0.00227408	0.00259411	0.00749227	0.120583
P15509	CSF2RA	1438	Granulocyte-macrophage colony-stimulating factor receptor subunit alpha [OS=Homo sapiens]	development	15202.7	13735.8	16228.5	10862.2	10852.6	6999.96	11174.7	14380.4	9370.85	15055.7	9571.59	11642	1.57295	1.2163	1.29322	0.0468324	0.0536889	0.268362	0.136546
Q969X6	UTP4	84916	U3 small nucleolar RNA-associated protein 4 homolog [OS=Homo sapiens]	cellular component movement;cellular homeostasis;metabolic process	11921.3	19054.9	14430.2	13061.2	2769.85	16678.6	30430.8	30384.8	24053.9	15135.5	10836.6	28289.8	1.3967	2.61059	-1.86911	0.0139415	0.343412	0.0175309	0.0298382
Q8TCD5	NT5C	30833	5'(3')-deoxyribonucleotidase, cytosolic type [OS=Homo sapiens]	cellular homeostasis	38799.7	37282.5	44520.5	38432.1	69260.9	24386.7	52416.6	63720.3	50413.8	40200.9	44026.6	55516.9	-1.09516	1.26099	-1.38099	0.433326	0.750263	0.533211	0.533211
O14657	TOR1B	27348	Torsin-1B [OS=Homo sapiens]	cell growth;coagulation;metabolic process	37598.5	44789.5	51180	47754.6	38094.1	16924.7	47387.3	72480	41201.5	44522.6	34257.8	53689.6	1.29963	1.56722	-1.20589	0.29745	0.446169	0.404311	0.446169
Q9BV23	ABHD6	57406	Monoacylglycerol lipase ABHD6 [OS=Homo sapiens]	cellular homeostasis;metabolic process	63558.4	52952.9	48763.2	28294.7	24938.2	19654.1	31807	33675.2	28840.3	55091.5	24295.7	31440.8	2.26755	1.29409	1.75223	0.00089363	0.00111717	0.147376	0.00226278
Q86U38	NOP9	161424	Nucleolar protein 9 [OS=Homo sapiens]	cellular component movement;cellular homeostasis;conjugation	18410.4	27803.3	25285.5	7773.81	3676.76	14759.8	26175.6	29588.3	28500.6	23833.1	8736.8	28088.2	2.7279	3.21493	-1.17854	0.0039214	0.0085098	0.00505631	0.281047
Q9UPN3	MACF1	23499	Microtubule-actin cross-linking factor 1, isoforms 1/2/3/5 [OS=Homo sapiens]	cell death;cell growth;coagulation;conjugation;defense response;development;metabolic process	20166.3	50953.5	37913.7	37613.4	35104.8	7290.79	25999.8	12803.2	21337.5	36344.5	26669.7	20046.8	1.36277	-1.33037	1.81298	0.401463	0.576657	0.576657	0.576657
P51948	MNAT1	4331	CDK-activating kinase assembly factor MAT1 [OS=Homo sapiens]	cell differentiation;cell growth;cell proliferation;cellular component movement;cellular homeostasis;coagulation;defense response;metabolic process	7342.71	16560.7	10781.5	6022.99	6471.21	6050.75	16427.6	10252.6	8268.21	11561.6	6181.65	11649.5	1.87032	1.88452	-1.0076	0.190475	0.181051	0.181051	0.977419
Q96JB5	CDK5RAP3	80279	CDK5 regulatory subunit-associated protein 3 [OS=Homo sapiens]	cell differentiation;cell growth;cell organization and biogenesis;cellular homeostasis;coagulation;defense response;development;metabolic process	363315	393016	320360	386145	364357	317930	364053	388325	343186	358897	356144	365188	1.00773	1.02539	-1.01753	0.93934	0.919352	0.919352	0.919352
Q9H2W6	MRPL46	26589	39S ribosomal protein L46, mitochondrial [OS=Homo sapiens]		73187	66369.7	127950	32298.3	49690.6	41122.7	55935	54633.8	52789.8	89169	41037.2	54452.9	2.17288	1.32691	1.63755	0.0624906	0.0792821	0.445927	0.118997
Q96FJ2	DYNLL2	140735	Dynein light chain 2, cytoplasmic [OS=Homo sapiens]	cell growth;metabolic process	30035	48333.3	37503.7	65584.7	67950.4	80700.7	54505.9	40348.3	41301.5	38624	71411.9	45385.2	-1.8489	-1.57346	-1.17505	0.00705656	0.00936433	0.013776	0.364078
Q5VUJ6	LRCH2	57631	Leucine-rich repeat and calponin homology domain-containing protein 2 [OS=Homo sapiens]		10284.2	14355.9	14278.1	12999.9	13545.3	13594.4	16914	18026.5	18756.4	12972.8	13379.9	17899	-1.03138	1.33776	-1.37974	0.010912	0.744321	0.013584	0.013584
Q13153	PAK1	5058	Serine/threonine-protein kinase PAK 1 [OS=Homo sapiens]	cell growth;cell organization and biogenesis;cellular homeostasis;coagulation;conjugation;defense response;development;metabolic process	88815	79646.6	78799.9	134838	145342	133483	101481	103149	97479.4	82420.5	137888	100703	-1.67298	-1.36925	-1.22182	3.55268e-05	3.76692e-05	0.000186326	0.00511057
Q13190	STX5	6811	Syntaxin-5 [OS=Homo sapiens]	cell growth;conjugation;metabolic process	8233.97	7809.78	6215.9	7590.98	6128.15	7805.35	8113.69	7482.34	5263.18	7419.88	7174.82	6953.07	1.03416	-1.03189	1.06714	0.891867	0.826215	0.826215	0.826215
O14579	COPE	11316	Coatomer subunit epsilon [OS=Homo sapiens]	conjugation;metabolic process	422157	357780	560565	364425	521497	533257	474326	491241	365754	446834	473060	443774	-1.05869	-1.06599	1.0069	0.909712	0.968108	0.968108	0.968108
P48729	CSNK1A1	1452	Casein kinase I isoform alpha [OS=Homo sapiens]	cell death;cell differentiation;cell growth;cell organization and biogenesis;cellular homeostasis;development;metabolic process	120532	109219	112128	93668.4	88095.8	123446	136072	121265	140576	113959	101737	132638	1.12014	1.30374	-1.1639	0.067211	0.289323	0.0780488	0.189146
P63167	DYNLL1	8655	Dynein light chain 1, cytoplasmic [OS=Homo sapiens]	cell growth;metabolic process	107242	81620.4	113779	265334	149332	345699	213065	191773	175983	100880	253455	193607	-2.51244	-1.30912	-1.91918	0.0503625	0.0574702	0.259189	0.15264
Q9NP97	DYNLRB1	83658	Dynein light chain roadblock-type 1 [OS=Homo sapiens]	metabolic process	58905.6	66771.2	68814.1	126312	99313.5	163615	114907	87903.3	99932.1	64830.3	129747	100914	-2.00133	-1.28572	-1.55659	0.0226742	0.0242174	0.134734	0.110733
P16591	FER	2241	Tyrosine-protein kinase Fer [OS=Homo sapiens]	cell communication;cell differentiation;cell growth;cell organization and biogenesis;cellular homeostasis;coagulation;development;metabolic process	6805.69	5893.16	9082.28	3307.56	4996.25	7141.67	6245.05	7402	7565.96	7260.38	5148.49	7071	1.41019	1.37341	1.02678	0.247425	0.257609	0.257609	0.883536
Q9BVL4	SELENOO	83642	Protein adenylyltransferase SelO, mitochondrial [OS=Homo sapiens]	cell organization and biogenesis;cellular homeostasis	8400.77	6149.62	8275.93	6696.02	6424.13	6334.03	8275.63	5016.19	6014.08	7608.77	6484.73	6435.3	1.17334	-1.00768	1.18235	0.456619	0.450386	0.961865	0.450386
Q96CM8	ACSF2	80221	Medium-chain acyl-CoA ligase ACSF2, mitochondrial [OS=Homo sapiens]	cellular homeostasis	15414.9	27662.6	16319.5	22736.4	42293.7	18383.4	11536.4	6434.4	11669.4	19799	27804.5	9880.04	-1.40434	-2.81421	2.00394	0.106276	0.293518	0.125788	0.293518
P61225	RAP2B	5912	Ras-related protein Rap-2b [OS=Homo sapiens]	cell communication;coagulation;development;metabolic process	116887	123212	104619	142141	92721.8	117578	84378.8	82970.1	79975.7	114906	117480	82441.6	-1.0224	-1.42501	1.39379	0.0554203	0.843844	0.0615133	0.0615133
Q6P1J9	CDC73	79577	Parafibromin [OS=Homo sapiens]	cell death;cell differentiation;cell growth;cell organization and biogenesis;cellular component movement;cellular homeostasis;defense response;development;metabolic process	79427.2	94109.7	81477.2	58638.1	20911.2	53322	89730.8	80906.5	79821.7	85004.7	44290.5	83486.3	1.91926	1.88497	1.01819	0.0141441	0.0154478	0.0154478	0.891226
P19388	POLR2E	5434	DNA-directed RNA polymerases I, II, and III subunit RPABC1 [OS=Homo sapiens]	cellular component movement;cellular homeostasis	15517	47173.4	28029.3	4703.38	10840.7	11593.3	39049.9	32578.9	31497.2	30239.9	9045.81	34375.3	3.34297	3.80014	-1.13675	0.0392498	0.0561055	0.0561055	0.622017
Q9UP83	COG5	10466	Conserved oligomeric Golgi complex subunit 5 [OS=Homo sapiens]	conjugation	13713.4	11295.3	15479.7	10703.3	9317.94	4140.4	10605.6	11574.6	11523.9	13496.1	8053.88	11234.7	1.67573	1.39494	1.20129	0.0775775	0.0902227	0.224337	0.284608
Q96RQ1	ERGIC2	51290	Endoplasmic reticulum-Golgi intermediate compartment protein 2 [OS=Homo sapiens]	conjugation	39336	81990.2	127563	40485.5	85721.7	134328	136799	108236	130783	82963.2	86845	125273	-1.04679	1.44249	-1.50998	0.384687	0.905002	0.395905	0.395905
Q96S59	RANBP9	10048	Ran-binding protein 9 [OS=Homo sapiens]	cell growth;development;metabolic process	32524.4	48928.8	42577.7	13074.8	24268.8	7947.88	44026.9	43620.5	44605.2	41343.7	15097.2	44084.2	2.7385	2.92003	-1.06629	0.0035513	0.00481686	0.00481686	0.638667
Q9BVJ6	UTP14A	10813	U3 small nucleolar RNA-associated protein 14 homolog A [OS=Homo sapiens]	cellular component movement;cellular homeostasis	12806.1	32840	19701.8	16460.2	5749.28	10853.3	40520.8	33772.8	36392.1	21782.6	11020.9	36895.2	1.97648	3.34774	-1.69379	0.0108066	0.10568	0.0113573	0.0553303
P17655	CAPN2	824	Calpain-2 catalytic subunit [OS=Homo sapiens]	cell organization and biogenesis;cellular homeostasis;coagulation;defense response;metabolic process	35781.4	29623.7	33499.1	30201.5	57336.8	51409.2	23289.1	24308.7	24231.6	32968.1	46315.9	23943.1	-1.40487	-1.93441	1.37693	0.0465545	0.151163	0.0525509	0.238086
O15294	OGT	8473	UDP-N-acetylglucosamine--peptide N-acetylglucosaminyltransferase 110 kDa subunit [OS=Homo sapiens]	cell organization and biogenesis;cellular homeostasis;development;metabolic process	24589.7	18957.7	22586.3	3616.62	11124.7	9477.51	29364.7	32775.1	26351	22044.6	8072.93	29496.9	2.73068	3.65381	-1.33806	0.000671244	0.00340169	0.000708233	0.0351485
Q96FQ6	S100A16	140576	Protein S100-A16 [OS=Homo sapiens]	metabolic process	4404.69	20022.4	20883.6	76424.9	70287.1	123175	41765.9	34546.6	23259.3	15103.6	89962.4	33190.6	-5.95636	-2.71048	-2.19753	0.00590451	0.00737664	0.0136117	0.2727
Q9GZS3	WDR61	80349	WD repeat-containing protein 61 [OS=Homo sapiens]	cell death;cell organization and biogenesis;cellular component movement;cellular homeostasis;development;metabolic process	147592	173162	146156	130677	123887	107022	157697	171466	138201	155637	120529	155788	1.29128	1.29254	-1.00097	0.0418806	0.0408937	0.0408937	0.990448
O00148	DDX39A	10212	ATP-dependent RNA helicase DDX39A [OS=Homo sapiens]	cellular component movement;cellular homeostasis;conjugation	317174	372032	331373	278359	65041.7	209637	315664	309114	295772	340193	184346	306850	1.84541	1.66454	1.10866	0.0580796	0.0793087	0.0916861	0.554408
Q15022	SUZ12	23512	Polycomb protein SUZ12 [OS=Homo sapiens]	cell organization and biogenesis;cellular homeostasis;defense response;metabolic process	60550.8	63380.3	62421.6	22715.7	7716.37	26386.4	52340.7	54745.7	43504.7	62117.6	18939.5	50197.1	3.27979	2.65039	1.23747	0.000570902	0.000661493	0.00187667	0.072378
Q9UKS6	PACSIN3	29763	Protein kinase C and casein kinase substrate in neurons protein 3 [OS=Homo sapiens]	cell growth;conjugation;metabolic process	208990	212493	190457	197466	160509	167426	171360	143614	198185	203980	175134	171053	1.16471	-1.02386	1.1925	0.183261	0.205313	0.816211	0.205313
P55196	AFDN	4301	Afadin [OS=Homo sapiens]	cell communication;cell death;cell growth;development;metabolic process	186379	234390	164106	175190	127534	126284	173862	166917	167415	194958	143003	169398	1.36332	1.18458	1.15089	0.130357	0.156625	0.279666	0.279666
P57678	GEMIN4	50628	Gem-associated protein 4 [OS=Homo sapiens]	cell growth;cellular component movement;cellular homeostasis	93228.1	78416.2	101767	42948.8	27916.3	32159.3	87264.7	83106.3	72011.4	91137.1	34341.4	80794.1	2.65385	2.35267	1.12802	0.000660138	0.000907156	0.00133813	0.223928
Q96I25	RBM17	84991	Splicing factor 45 [OS=Homo sapiens]	cellular component movement;cellular homeostasis;metabolic process	91194	113845	107041	116167	35187.2	101077	107571	127919	101695	104027	84144	112395	1.23629	1.33574	-1.08044	0.465918	0.601576	0.601576	0.716828
O95155	UBE4B	10277	Ubiquitin conjugation factor E4 B [OS=Homo sapiens]	cell organization and biogenesis;cellular homeostasis;coagulation;development;metabolic process	8709.99	9793.64	11708.5	4189.16	3072.28	4546.53	9154.08	6695.68	5857.65	10070.7	3935.99	7235.8	2.55863	1.83837	1.39179	0.00499769	0.00504528	0.0410805	0.0471516
O60293	ZFC3H1	196441	Zinc finger C3H1 domain-containing protein [OS=Homo sapiens]	cellular component movement;cellular homeostasis	6030.08	4697.74	7664.75	2881.16	1942.36	3709.57	3859.36	3502.29	4264.02	6130.86	2844.36	3875.22	2.15544	1.36242	1.58207	0.0196904	0.0229468	0.263004	0.0532042
P35237	SERPINB6	5269	Serpin B6 [OS=Homo sapiens]	coagulation;metabolic process	52621	53861.9	62122	47678.8	103443	48631.8	115120	121409	115375	56201.7	66584.6	117301	-1.18475	1.76169	-2.08715	0.0152856	0.523638	0.0244028	0.0217541
Q15811	ITSN1	6453	Intersectin-1 [OS=Homo sapiens]	conjugation;defense response;development;metabolic process	68322.9	113698	74476.3	66975.7	68064.8	45425.8	46682.2	44090.8	86040.3	85499.2	60155.5	58937.8	1.4213	-1.02066	1.45067	0.290142	0.284463	0.94566	0.284463
P50897	PPT1	5538	Palmitoyl-protein thioesterase 1 [OS=Homo sapiens]	cell death;cell growth;cell organization and biogenesis;cellular homeostasis;conjugation;defense response;metabolic process	15621.5	11415.2	11851.4	8642.59	16018.6	16919.5	12911.8	16036.6	10687.1	12962.7	13860.2	13211.8	-1.06924	-1.04908	-1.01922	0.943978	0.929899	0.929899	0.929899
Q96G46	DUS3L	56931	tRNA-dihydrouridine(47) synthase [NAD(P)(+)]-like [OS=Homo sapiens]	cellular component movement;cellular homeostasis	15431.7	15802.3	16178.9	12803	12013.7	13307.6	20586.9	17221.7	18901.9	15804.3	12708.1	18903.5	1.24364	1.48752	-1.1961	0.00117495	0.0118681	0.00114808	0.0118681
Q9P0S3	ORMDL1	94101	ORM1-like protein 1 [OS=Homo sapiens]	cellular homeostasis;metabolic process	31119.2	63497.2	10028.3	2951.43	29727.3	5549.28	45975.6	40034.4	5372.83	34881.6	12742.7	30461	2.73738	2.39047	1.14512	0.466775	0.536604	0.536604	0.81205
Q96JG6	VPS50	55610	Syndetin [OS=Homo sapiens]	conjugation	7924.91	8588.27	9027.44	6513.72	4724.88	4594.26	9285.13	6884.14	5985.51	8513.54	5277.62	7384.93	1.61314	1.39929	1.15283	0.0430786	0.0501947	0.114409	0.295627
Q9NWY4	HPF1	54969	Histone PARylation factor 1 [OS=Homo sapiens]	cell organization and biogenesis;cell proliferation;cellular homeostasis;coagulation;metabolic process	23503.3	19943.8	14129.5	11295	14425.3	12065.4	22056.3	21057	18302.4	19192.2	12595.2	20471.9	1.52377	1.62537	-1.06668	0.0427865	0.0604801	0.0604801	0.6312
Q1KMD3	HNRNPUL2	221092	Heterogeneous nuclear ribonucleoprotein U-like protein 2 [OS=Homo sapiens]		180478	316451	239383	398823	83106.6	266785	214867	213807	235542	245437	249571	221405	-1.01684	-1.12721	1.10854	0.93357	0.961226	0.961226	0.961226
Q9NS86	LANCL2	55915	LanC-like protein 2 [OS=Homo sapiens]	cellular homeostasis;metabolic process	97911.1	93318.6	81638.7	57608.9	85744.7	77945.7	103326	112279	110733	90956.1	73766.4	108779	1.23303	1.47464	-1.19595	0.0153713	0.0815516	0.0160014	0.0815516
Q16774	GUK1	2987	Guanylate kinase [OS=Homo sapiens]	cellular homeostasis;conjugation	170001	121699	182081	135741	298691	244959	142096	159058	94219.9	157927	226463	131792	-1.43398	-1.71834	1.19831	0.173553	0.265841	0.237623	0.581188
Q8N7H5	PAF1	54623	RNA polymerase II-associated factor 1 homolog [OS=Homo sapiens]	cell death;cell growth;cell organization and biogenesis;cellular component movement;cellular homeostasis;defense response;development;metabolic process	16378.7	24808.5	13869.4	15480.6	7671.86	7225.4	21341.1	12513.6	13556.2	18352.2	10126	15803.6	1.81239	1.5607	1.16126	0.209012	0.285002	0.33107	0.562085
Q15269	PWP2	5822	Periodic tryptophan protein 2 homolog [OS=Homo sapiens]	cell growth;cellular component movement;cellular homeostasis	13077.6	59882.6	16516.7	38930.3	2826.65	38264.4	51714.2	91263.4	92588.9	29825.6	26673.8	78522.1	1.11816	2.9438	-2.63271	0.0610665	0.874535	0.0656129	0.0656129
A3KN83	SBNO1	55206	Protein strawberry notch homolog 1 [OS=Homo sapiens]	metabolic process	10945.7	11083.5	11578.8	6686.02	9054.28	7118.78	11649.3	12472.1	11526	11202.6	7619.69	11882.5	1.47022	1.55944	-1.06069	0.00136947	0.0024467	0.0019739	0.34333
Q8IVT5	KSR1	8844	Kinase suppressor of Ras 1 [OS=Homo sapiens]	cell organization and biogenesis;cellular homeostasis;development;metabolic process	50129.5	39605	36979.5	26103.9	32702.2	31604.8	31615.4	45754.1	37407.7	42238	30137	38259.1	1.40153	1.26951	1.104	0.120617	0.153157	0.230682	0.454464
Q8IWA0	WDR75	84128	WD repeat-containing protein 75 [OS=Homo sapiens]	cellular component movement;cellular homeostasis;metabolic process	5322.34	19049.9	7113.62	13728.8	3046.54	8041.43	23310.2	23311.4	19996.7	10495.3	8272.25	22206.1	1.26873	2.68441	-2.11582	0.040487	0.632931	0.057084	0.057084
O76031	CLPX	10845	ATP-dependent Clp protease ATP-binding subunit clpX-like, mitochondrial [OS=Homo sapiens]	cell organization and biogenesis;cellular homeostasis;metabolic process	61320.9	51045.2	58046.5	18331.3	8858.85	16949.3	28482.4	9083.38	11656.7	56804.2	14713.1	16407.5	3.86078	1.11516	3.46209	0.00068602	0.000820204	0.788859	0.000820204
Q9Y6Q1	CAPN6	827	Calpain-6 [OS=Homo sapiens]	cell growth;cell organization and biogenesis;metabolic process	13271.6	17421.1	16955.9	7078.66	8821.1	6302.58	30387.5	32213.9	25464.6	15882.9	7400.78	29355.3	2.14611	3.96651	-1.84824	0.00011893	0.00617557	0.000119322	0.000906385
Q9Y6G9	DYNC1LI1	51143	Cytoplasmic dynein 1 light intermediate chain 1 [OS=Homo sapiens]	cell differentiation;cell growth;metabolic process	460473	600501	448084	451709	508017	313148	486092	446085	468455	503019	424291	466877	1.18555	1.10037	1.07741	0.494772	0.584603	0.584603	0.584603
O43929	ORC4	5000	Origin recognition complex subunit 4 [OS=Homo sapiens]	cell proliferation;cellular homeostasis	47575.6	38682.1	37932.1	11464	15118.8	10147.4	41550.6	124132	90704.2	41396.6	12243.4	85462.3	3.38114	6.98028	-2.06448	0.0274536	0.190986	0.0302176	0.101234
Q9UHJ6	SHPK	23729	Sedoheptulokinase [OS=Homo sapiens]	cellular homeostasis;metabolic process	48025.7	47551.1	47753.1	38928.3	37331.2	30032.3	48094.9	51283.8	44828.2	47776.6	35430.6	48069	1.34846	1.35671	-1.00612	0.005301	0.00576941	0.00576941	0.91751
Q96I51	RCC1L	81554	RCC1-like G exchanging factor-like protein [OS=Homo sapiens]	cell growth;metabolic process	52745.4	41979.4	43523.4	27157.2	16922.6	4676	27411.7	35687.3	24414.2	46082.7	16252	29171	2.83552	1.79493	1.57974	0.0113567	0.0118567	0.0971266	0.0633965
Q9H9T3	ELP3	55140	Elongator complex protein 3 [OS=Homo sapiens]	cellular component movement;cellular homeostasis;defense response;metabolic process	21591.6	16717	21707.9	15000.8	18008.3	20791.2	20789.6	22620.9	22945.2	20005.5	17933.4	22118.6	1.11554	1.23337	-1.10563	0.191171	0.338281	0.241013	0.338281
P11310	ACADM	34	Medium-chain specific acyl-CoA dehydrogenase, mitochondrial [OS=Homo sapiens]	cellular homeostasis;coagulation;defense response;metabolic process	51698.2	73474.1	72482.5	22654	12668.5	16853.5	17647.5	22657	14370	65884.9	17392	18224.8	3.78823	1.04789	3.61512	0.0004624	0.000519551	0.903149	0.000519551
O95232	LUC7L3	51747	Luc7-like protein 3 [OS=Homo sapiens]	cell growth;cellular component movement;cellular homeostasis	84764.1	102267	66388.2	44973.6	7215.52	13399.4	61310.8	56732.6	60166.6	84473	21862.8	59403.3	3.86377	2.71709	1.42202	0.00781976	0.00821485	0.0393268	0.0979643
Q9GZM5	YIPF3	25844	Protein YIPF3 [OS=Homo sapiens]	metabolic process	46286.2	52799.6	36621.5	17834.8	44414.4	19327.4	43134.6	37417.3	39003.8	45235.8	27192.2	39851.9	1.66356	1.46556	1.1351	0.154442	0.205342	0.256159	0.532788
Q9Y608	LRRFIP2	9209	Leucine-rich repeat flightless-interacting protein 2 [OS=Homo sapiens]	cell death;development;metabolic process	8310.22	10651.3	11720	8520.45	4390.63	9234.65	13189.3	17036.7	10827.3	10227.2	7381.91	13684.4	1.38543	1.85378	-1.33805	0.0627289	0.222784	0.0709188	0.222784
P27707	DCK	1633	Deoxycytidine kinase [OS=Homo sapiens]	cellular homeostasis	91868.2	75482	101209	89808.7	101996	81366	98969.1	104533	96763.3	89519.9	91056.9	100089	-1.01717	1.09919	-1.11806	0.421621	0.855269	0.458958	0.458958
O15212	PFDN6	10471	Prefoldin subunit 6 [OS=Homo sapiens]	cell growth;metabolic process	14474	19489.3	28128.3	20505.9	80600.5	72090.2	62601.1	49141	54696.9	20697.2	57732.2	55479.7	-2.78937	-1.0406	-2.68054	0.104409	0.10885	0.892597	0.10885
Q9NPI6	DCP1A	55802	mRNA-decapping enzyme 1A [OS=Homo sapiens]	cellular component movement;cellular homeostasis;metabolic process	116069	98847.5	118089	74716.9	23326.3	68745.2	113084	92996.4	86986.7	111002	55596.2	97689.1	1.99657	1.75712	1.13628	0.0276919	0.0356785	0.0529099	0.424877
Q13330	MTA1	9112	Metastasis-associated protein MTA1 [OS=Homo sapiens]	cell growth;cell organization and biogenesis;cell proliferation;cellular homeostasis;coagulation;development;metabolic process	27830.5	28790.2	21492.5	19967.9	10734.1	16589.9	31470.7	27154.3	22575.4	26037.7	15763.9	27066.8	1.65173	1.71701	-1.03952	0.035466	0.0421898	0.0421898	0.782823
Q5T9A4	ATAD3B	83858	ATPase family AAA domain-containing protein 3B [OS=Homo sapiens]	cell growth	46850.2	66836.6	40716.1	24896.1	11871	17732.3	23499.7	21423.4	25953	51467.6	18166.5	23625.4	2.83311	1.30049	2.17849	0.00760472	0.0108972	0.477937	0.0125593
Q9H974	QTRT2	79691	Queuine tRNA-ribosyltransferase accessory subunit 2 [OS=Homo sapiens]	cellular component movement;cellular homeostasis	40625.1	52149.4	45687.3	38508.2	44139	32255	47310	44732.2	42996.6	46153.9	38300.7	45012.9	1.20504	1.17525	1.02535	0.191228	0.221427	0.221427	0.787057
Q7L1W4	LRRC8D	55144	Volume-regulated anion channel subunit LRRC8D [OS=Homo sapiens]	cell growth;coagulation;conjugation;metabolic process	29114.9	47830.8	45765.6	53551.1	41138	48396.5	49110.8	50753.1	43114.4	40903.8	47695.2	47659.4	-1.16603	-1.00075	-1.16516	0.47006	0.451432	0.995418	0.451432
P46734	MAP2K3	5606	Dual specificity mitogen-activated protein kinase kinase 3 [OS=Homo sapiens]	cell organization and biogenesis;cellular homeostasis;coagulation;development;metabolic process	17922.9	15053	18246.7	9107.98	13989.6	13883	16308.3	18703.9	18020.4	17074.2	12326.9	17677.5	1.38512	1.43407	-1.03534	0.0342226	0.0431236	0.0431236	0.728589
O14929	HAT1	8520	Histone acetyltransferase type B catalytic subunit [OS=Homo sapiens]	cell growth;cell organization and biogenesis;cellular homeostasis;metabolic process	661341	616547	617438	254345	205146	187068	660037	656253	551605	631775	215520	622632	2.9314	2.88897	1.01469	3.36303e-05	3.92708e-05	3.92708e-05	0.805079
P09001	MRPL3	11222	39S ribosomal protein L3, mitochondrial [OS=Homo sapiens]	cell organization and biogenesis;cellular homeostasis	56347	39300.2	47971.7	20468.3	14459.3	20120.8	30739.8	35079.5	35153.3	47873	18349.5	33657.5	2.60895	1.83425	1.42236	0.0017919	0.00176468	0.0192882	0.0192882
O95359	TACC2	10579	Transforming acidic coiled-coil-containing protein 2 [OS=Homo sapiens]	cell differentiation;cell growth;defense response	78488.4	106600	64907	28143	39845.4	33356.9	85046.9	62995.5	67046.3	83331.7	33781.7	71696.2	2.46677	2.12234	1.16229	0.01325	0.0169303	0.0272433	0.361377
O95302	FKBP9	11328	Peptidyl-prolyl cis-trans isomerase FKBP9 [OS=Homo sapiens]	cell organization and biogenesis;cellular homeostasis;metabolic process	5017.45	4142.64	3208.67	4803.87	8384.48	4511.91	2823.95	3142.65	4873.38	4122.92	5900.09	3613.33	-1.43105	-1.63287	1.14103	0.22392	0.292629	0.292629	0.690423
Q15061	WDR43	23160	WD repeat-containing protein 43 [OS=Homo sapiens]	cellular component movement;cellular homeostasis;metabolic process	102658	197671	121931	176808	43116.2	171050	276709	276032	251656	140753	130325	268132	1.08002	2.05741	-1.90498	0.0337937	0.817711	0.038846	0.038846
Q9UN37	VPS4A	27183	Vacuolar protein sorting-associated protein 4A [OS=Homo sapiens]	cell differentiation;cell growth;cell organization and biogenesis;cellular homeostasis;conjugation;defense response;development;metabolic process	76692.3	58748.8	60675.9	57286.6	50386	63373.9	66564.4	77014.9	91604	65372.3	57015.5	78394.4	1.14657	1.37497	-1.1992	0.0977556	0.343638	0.117235	0.240498
P49005	POLD2	5425	DNA polymerase delta subunit 2 [OS=Homo sapiens]	cell proliferation;cellular homeostasis;coagulation	42385.6	5071.06	43940.5	2650.51	3068.02	2783.13	35580.6	48572.3	44919.3	30465.7	2833.88	43024.1	10.7505	15.182	-1.41221	0.0255215	0.0654098	0.0300481	0.290853
O95376	ARIH2	10425	E3 ubiquitin-protein ligase ARIH2 [OS=Homo sapiens]	cell differentiation;cell organization and biogenesis;cellular homeostasis;defense response;metabolic process	32819.7	33085	32165.3	29445.8	26903.8	27591.6	39031.7	40757.2	34082.5	32690	27980.4	37957.2	1.16832	1.35656	-1.16112	0.00389734	0.0368169	0.00390275	0.0364412
Q13123	IK	3550	Protein Red [OS=Homo sapiens]	cell differentiation;cellular component movement;cellular homeostasis;development;metabolic process	81236.2	115186	86381.4	107979	19512.3	101434	100794	107068	111475	94267.9	76308.2	106446	1.23536	1.39495	-1.12919	0.515911	0.64236	0.64236	0.64236
Q13112	CHAF1B	8208	Chromatin assembly factor 1 subunit B [OS=Homo sapiens]	cell differentiation;cell growth;cell proliferation;cellular homeostasis;coagulation	69472.8	82252.6	71129.9	20065.3	14361	11907.4	64916.2	68480	63473.5	74285.1	15444.6	65623.2	4.80979	4.24895	1.13199	1.2769e-05	1.89493e-05	2.39856e-05	0.0742187
P13489	RNH1	6050	Ribonuclease inhibitor [OS=Homo sapiens]	cellular component movement;cellular homeostasis;metabolic process	436697	534282	326294	573269	917591	486473	641201	595674	604068	432424	659111	613647	-1.52422	-1.07409	-1.41909	0.210717	0.26654	0.714922	0.26654
Q14624	ITIH4	3700	Inter-alpha-trypsin inhibitor heavy chain H4 [OS=Homo sapiens]	cellular homeostasis;coagulation;metabolic process	46967	35736.8	25297.5	202127	623361	272322	253501	183695	387338	36000.4	365937	274845	-10.1648	-1.33143	-7.63448	0.0714112	0.0915013	0.466369	0.131388
O14964	HGS	9146	Hepatocyte growth factor-regulated tyrosine kinase substrate [OS=Homo sapiens]	cell growth;cellular homeostasis;conjugation;development;metabolic process	112569	147757	114779	80355.1	83186.6	92408.5	119599	117248	112915	125035	85316.8	116587	1.46554	1.36652	1.07246	0.0157766	0.0209198	0.029215	0.42557
Q96A65	EXOC4	60412	Exocyst complex component 4 [OS=Homo sapiens]	cell death;cell growth;conjugation;defense response;metabolic process	54680.9	40654.8	51594.6	40514	33441	16158.5	39975.7	50000.5	37663.5	48976.8	30037.9	42546.6	1.6305	1.41643	1.15113	0.108892	0.135993	0.220777	0.425186
Q92541	RTF1	23168	RNA polymerase-associated protein RTF1 homolog [OS=Homo sapiens]	cell death;cell organization and biogenesis;cellular component movement;cellular homeostasis;defense response;development;metabolic process	10259.2	10858.8	11324	6812.96	7375.1	9119.26	14216.3	10489.1	9988.68	10814	7769.11	11564.7	1.39193	1.48855	-1.06942	0.0499625	0.0767696	0.0694046	0.571077
P03915	MT-ND5	4540	NADH-ubiquinone oxidoreductase chain 5 [OS=Homo sapiens]	cell growth;cellular homeostasis;coagulation;conjugation;metabolic process	115773	111315	101819	67667.2	28241.2	59705	68162.2	76478.5	80832.9	109636	51871.1	75157.8	2.11362	1.44893	1.45874	0.0051007	0.00529158	0.0748889	0.0283845
O43808	SLC25A17	10478	Peroxisomal membrane protein PMP34 [OS=Homo sapiens]	cellular homeostasis;conjugation	8259.06	8043.36	8197.42	7528.64	9428.24	5731.11	7801.25	4900.54	6666.17	8166.61	7562.67	6455.99	1.07986	-1.17142	1.26497	0.360112	0.606702	0.537246	0.52492
P29144	TPP2	7174	Tripeptidyl-peptidase 2 [OS=Homo sapiens]	cell organization and biogenesis;cellular homeostasis	75652.2	103930	67523	61098.4	36597.8	69342.4	98568.5	99951.5	77826.6	82368.3	55679.6	92115.5	1.47933	1.65439	-1.11834	0.0801178	0.140448	0.104252	0.494592
Q9H201	EPN3	55040	Epsin-3 [OS=Homo sapiens]	conjugation	15294.7	15440.1	14638.6	14507	11215.9	12790.5	14734.2	12471.8	11230.5	15124.5	12837.8	12812.2	1.17812	-1.002	1.18048	0.151842	0.144021	0.983082	0.144021
Q9NP81	SARS2	54938	Serine--tRNA ligase, mitochondrial [OS=Homo sapiens]	cell organization and biogenesis;cellular component movement;cellular homeostasis	92214	120927	89511.2	50306.2	79628.6	30037.8	74213.8	80076.2	84194.3	100884	53324.2	79494.8	1.8919	1.49078	1.26906	0.0459506	0.0508832	0.182608	0.191392
Q9ULA0	DNPEP	23549	Aspartyl aminopeptidase [OS=Homo sapiens]	cell organization and biogenesis;cellular homeostasis	161066	151987	169578	189244	186633	181066	129592	120467	115946	160877	185647	122002	-1.15397	-1.52168	1.31864	8.69748e-05	0.00460866	8.69046e-05	0.000690785
O75688	PPM1B	5495	Protein phosphatase 1B [OS=Homo sapiens]	cell organization and biogenesis;cellular homeostasis;metabolic process	641762	593350	608623	408002	549587	445686	599851	585336	658715	614578	467759	614634	1.31388	1.314	-1.00009	0.017181	0.0171229	0.0171229	0.998947
Q8NI36	WDR36	134430	WD repeat-containing protein 36 [OS=Homo sapiens]	cellular component movement;cellular homeostasis;metabolic process	13889.5	25480.6	19938.9	28073.6	2068.49	21410.6	47327.7	42883.9	35808	19769.7	17184.2	42006.5	1.15045	2.44448	-2.1248	0.0295055	0.740442	0.036744	0.036744
Q9P260	RELCH	57614	RAB11-binding protein RELCH [OS=Homo sapiens]	conjugation	73926.8	94785.9	82039.6	47970.8	56260	44006.4	81072.3	73023.8	73268.6	83584.1	49412.4	75788.2	1.69156	1.53379	1.10286	0.00341762	0.00433992	0.00777834	0.25242
Q9NWU1	OXSM	54995	3-oxoacyl-[acyl-carrier-protein] synthase, mitochondrial [OS=Homo sapiens]	cellular homeostasis	82982.2	87259.8	62740.8	44998	95067.2	36844	82331.3	74015.2	75716.6	77660.9	58969.7	77354.4	1.31696	1.31176	1.00396	0.465692	0.450639	0.450639	0.985537
P50851	LRBA	987	Lipopolysaccharide-responsive and beige-like anchor protein [OS=Homo sapiens]	metabolic process	214819	118172	122739	138708	146136	136667	82435.4	134405	132661	151910	140504	116501	1.08118	-1.20603	1.30394	0.507988	0.710719	0.66648	0.66648
P42345	MTOR	2475	Serine/threonine-protein kinase mTOR [OS=Homo sapiens]	cell growth;cell organization and biogenesis;cellular homeostasis;coagulation;defense response;development;metabolic process	65608.9	64404.2	74821.5	38159.8	33717.9	35267.6	77966.4	77287	57400.2	68278.2	35715.1	70884.6	1.91175	1.98472	-1.03817	0.00226087	0.00291867	0.00291867	0.689738
Q9NZJ9	NUDT4	11163	Diphosphoinositol polyphosphate phosphohydrolase 2 [OS=Homo sapiens]	cellular homeostasis;development	425181	223660	280978	3.36954e+06	1.29433e+07	3.66463e+06	5.90182e+06	2.99143e+06	7.32729e+06	309940	6.65915e+06	5.40684e+06	-21.4853	-1.23162	-17.4448	0.128339	0.173095	0.66711	0.173095
Q9BYP7	WNK3	65267	Serine/threonine-protein kinase WNK3 [OS=Homo sapiens]	cell growth;cell organization and biogenesis;cellular homeostasis;coagulation;development;metabolic process	11996.4	13191.5	10030.7	19811.8	20274.2	21577.6	19129.9	14060.8	24999.6	11739.5	20554.5	19396.8	-1.75088	-1.05969	-1.65226	0.0347664	0.0459757	0.685482	0.0459757
Q9H3P7	ACBD3	64746	Golgi resident protein GCP60 [OS=Homo sapiens]	cellular homeostasis	413955	546893	468563	562219	472192	396757	380486	412182	373701	476470	477056	388790	-1.00123	-1.22703	1.22552	0.219113	0.991228	0.205481	0.205481
Q9UPQ8	DOLK	22845	Dolichol kinase [OS=Homo sapiens]	cell organization and biogenesis;cellular homeostasis	16480.7	14684.8	14002.1	6652.18	9136.33	4075.74	12766.6	17227.7	14113	15055.9	6621.42	14702.4	2.27381	2.22043	1.02404	0.0043146	0.00496651	0.00496651	0.843784
Q5K4L6	SLC27A3	11000	Solute carrier family 27 member 3 [OS=Homo sapiens]	cellular homeostasis;conjugation	11876.7	9828.76	7292.21	15124.7	14618.4	7849.05	8115.17	9950.65	7439.71	9665.89	12530.7	8501.85	-1.29638	-1.47388	1.13692	0.268736	0.384445	0.384385	0.628423
Q92667	AKAP1	8165	A-kinase anchor protein 1, mitochondrial [OS=Homo sapiens]	coagulation;metabolic process	17796.7	23639.3	23339.6	8165.87	4178.71	9870.09	17025.3	16457.6	11287.2	21591.9	7404.89	14923.4	2.91589	2.01534	1.44685	0.00430192	0.00431938	0.0387322	0.0400684
P33897	ABCD1	215	ATP-binding cassette sub-family D member 1 [OS=Homo sapiens]	cell growth;cellular homeostasis;conjugation;defense response;metabolic process	95980.6	95604.5	102929	44212.2	45926	36762	80584.2	58546.1	53431.6	98171.5	42300.1	64187.3	2.32083	1.51743	1.52945	0.000851143	0.000864087	0.0258549	0.00572041
O75153	CLUH	23277	Clustered mitochondria protein homolog [OS=Homo sapiens]	cell growth	243583	310913	262482	111014	53888.2	102835	310670	278477	246678	272326	89245.9	278608	3.05141	3.12181	-1.02307	0.000593366	0.000696168	0.000696168	0.821161
P09234	SNRPC	6631	U1 small nuclear ribonucleoprotein C [OS=Homo sapiens]	cell growth;cellular component movement;cellular homeostasis	89619.6	105882	102566	75508.6	88960.1	153836	114187	104742	107871	99356.1	106102	108933	-1.06789	1.02669	-1.09639	0.890975	0.893541	0.893541	0.893541
Q8NHV4	NEDD1	121441	Protein NEDD1 [OS=Homo sapiens]	cell differentiation;metabolic process	26667.4	30685.5	5836.58	10060.7	7716.82	6261.62	15116.3	9539.47	11456.8	21063.2	8013.04	12037.5	2.62861	1.50224	1.74979	0.201202	0.273328	0.558075	0.320689
Q99700	ATXN2	6311	Ataxin-2 [OS=Homo sapiens]	cell growth;cellular component movement;cellular homeostasis;conjugation;metabolic process	62507.8	59829.5	55986.6	38504.5	35122.6	38589.4	49055	43764.8	47387.9	59441.3	37405.5	46735.9	1.5891	1.24944	1.27186	0.000180166	0.000176486	0.00554503	0.00180649
Q16890	TPD52L1	7164	Tumor protein D53 [OS=Homo sapiens]	cell differentiation;metabolic process	83614	44181.5	87818.4	177461	236890	218950	107661	96779.5	107044	71871.3	211101	103828	-2.9372	-2.03317	-1.44464	0.000689128	0.000864306	0.00174664	0.135451
O43314	PPIP5K2	23262	Inositol hexakisphosphate and diphosphoinositol-pentakisphosphate kinase 2 [OS=Homo sapiens]	cellular homeostasis;metabolic process	13169.3	10200.3	9677.81	8865.62	8778.71	6083.05	10191.4	11615.4	9646.9	11015.8	7909.13	10484.6	1.3928	1.32563	1.05067	0.0979224	0.128846	0.128846	0.686712
P55327	TPD52	7163	Tumor protein D52 [OS=Homo sapiens]	conjugation;defense response;metabolic process	117943	127789	104778	269407	286715	327187	223405	180120	288806	116836	294436	230777	-2.52007	-1.27585	-1.97522	0.00283914	0.00301801	0.0768431	0.013163
P19404	NDUFV2	4729	NADH dehydrogenase [ubiquinone] flavoprotein 2, mitochondrial [OS=Homo sapiens]	cellular homeostasis;conjugation;defense response	15009.7	27698	24009.4	18617.5	16638	21363.7	24056.1	14846.1	16695.9	22239.1	18873.1	18532.7	1.17835	-1.01837	1.19999	0.616496	0.648335	0.934942	0.648335
P61006	RAB8A	4218	Ras-related protein Rab-8A [OS=Homo sapiens]	cell growth;cellular homeostasis;conjugation;defense response;metabolic process	67368.5	71264.7	43019.8	68838.6	72407.3	34147.2	27686	29517.5	26968.5	60551	58464.4	28057.3	1.03569	-2.08375	2.15812	0.0676994	0.871043	0.072818	0.072818
Q969G3	SMARCE1	6605	SWI/SNF-related matrix-associated actin-dependent regulator of chromatin subfamily E member 1 [OS=Homo sapiens]	cell growth;defense response;metabolic process	96999.9	139289	101373	91665.4	62483.3	73643.9	113041	94663.2	93710.2	112554	75930.9	100472	1.48232	1.3232	1.12026	0.0949356	0.118079	0.193746	0.419873
O95816	BAG2	9532	BAG family molecular chaperone regulator 2 [OS=Homo sapiens]	cell organization and biogenesis;cellular homeostasis;metabolic process	29207.6	15088	36760.1	15084.2	3343.32	17969.6	23894.3	24222.7	16436.6	27018.6	12132.4	21517.9	2.22699	1.7736	1.25563	0.158431	0.201636	0.313862	0.441333
Q9BSD7	NTPCR	84284	Cancer-related nucleoside-triphosphatase [OS=Homo sapiens]		164144	26224.4	192816	91440.1	148788	21819.7	73962.3	82732.9	80506.3	127728	87349.4	79067.2	1.46227	-1.10475	1.61544	0.625162	0.695882	0.877823	0.695882
Q9BV20	MRI1	84245	Methylthioribose-1-phosphate isomerase [OS=Homo sapiens]	cellular homeostasis	85390.4	81443.7	71161.1	68599.8	80469.1	70092.2	86312	106983	74666.1	79331.7	73053.7	89320.3	1.08594	1.22267	-1.12591	0.265853	0.511086	0.361059	0.463553
P42566	EPS15	2060	Epidermal growth factor receptor substrate 15 [OS=Homo sapiens]	cell growth;cellular homeostasis;conjugation;metabolic process	128163	141693	137155	98912.6	100805	115138	119271	129677	130213	135671	104952	126387	1.29269	1.20423	1.07346	0.0058958	0.00675892	0.0181383	0.175198
Q4G0P3	HYDIN	54768	Hydrocephalus-inducing protein homolog [OS=Homo sapiens]	cell growth;defense response;metabolic process	48569.2	60582.2	39279.7	31135.7	39650.1	31892.8	43247.4	38859.2	42696.1	49477.1	34226.2	41600.9	1.44559	1.21547	1.18933	0.090295	0.104616	0.2372	0.2372
Q6NUQ1	RINT1	60561	RAD50-interacting protein 1 [OS=Homo sapiens]	cell differentiation;coagulation;conjugation;development;metabolic process	15161.8	12916.9	13309.4	8926.74	10022	7523.06	9131.97	11161.3	9525.68	13796	8823.94	9939.66	1.56347	1.12644	1.38798	0.00486224	0.00623358	0.29021	0.0105751
Q8IUR7	ARMC8	25852	Armadillo repeat-containing protein 8 [OS=Homo sapiens]	cell organization and biogenesis;cellular homeostasis	166366	190108	186300	101877	89109.6	99046	203977	195990	171997	180925	96677.7	190655	1.87142	1.97206	-1.05378	0.000185526	0.000281268	0.000281268	0.384643
Q13057	COASY	80347	Bifunctional coenzyme A synthase [OS=Homo sapiens]	cellular homeostasis	105111	121991	90210.1	77665.7	92265.7	76428.3	105698	128325	99565.8	105771	82119.9	111196	1.288	1.35407	-1.0513	0.0842734	0.117365	0.117365	0.643922
P19634	SLC9A1	6548	Sodium/hydrogen exchanger 1 [OS=Homo sapiens]	cell growth;coagulation;conjugation;defense response;development;metabolic process	65648.3	85332.7	54216.3	50799.4	27982	43859.5	38028.6	36479.8	43362	68399.1	40880.3	39290.1	1.67316	-1.04047	1.74087	0.0362651	0.0395506	0.871221	0.0395506
P62312	LSM6	11157	U6 snRNA-associated Sm-like protein LSm6 [OS=Homo sapiens]	cellular component movement;cellular homeostasis	50540.1	64573.4	66164.9	124816	90401.1	156478	94926.6	80706.7	79146.9	60426.2	123898	84926.7	-2.05041	-1.45888	-1.40546	0.0238199	0.0262509	0.0860471	0.190676
O94903	PLPBP	11212	Pyridoxal phosphate homeostasis protein [OS=Homo sapiens]		165098	168630	119386	187400	201348	176306	195203	222301	133703	151038	188351	183736	-1.24705	-1.02512	-1.21649	0.351066	0.375616	0.863396	0.375616
Q5JWF2	GNAS	2778	Guanine nucleotide-binding protein G(s) subunit alpha isoforms XLas [OS=Homo sapiens]	cell communication;coagulation;defense response;development;metabolic process	1.06963e+06	1.01087e+06	949716	1.1263e+06	1.08581e+06	1.01955e+06	981416	950661	938976	1.01007e+06	1.07722e+06	957018	-1.06648	-1.1256	1.05544	0.0596372	0.208655	0.0673649	0.226591
Q9NQ50	MRPL40	64976	39S ribosomal protein L40, mitochondrial [OS=Homo sapiens]	metabolic process	33562.1	35016.5	36990.7	21500.3	19815.4	21418.4	25122.9	28116.7	20872.5	35189.8	20911.3	24704	1.68281	1.18137	1.42446	0.000842394	0.00099476	0.099784	0.00255137
Q9UK59	DBR1	51163	Lariat debranching enzyme [OS=Homo sapiens]	cellular component movement;cellular homeostasis	96328.6	152807	203856	94633.5	96868.7	74682.8	258504	109165	109281	150997	88728.3	158983	1.70179	1.7918	-1.05289	0.346385	0.366363	0.366363	0.873942
Q16864	ATP6V1F	9296	V-type proton ATPase subunit F [OS=Homo sapiens]	conjugation	3712.51	14459.2	2426.62	4569.75	21981	31505.1	4000.78	8620.5	2769.8	6866.12	19351.9	5130.36	-2.81847	-3.77204	1.33833	0.185549	0.206993	0.206993	0.81994
O15541	RNF113A	7737	E3 ubiquitin-protein ligase RNF113A [OS=Homo sapiens]	cell organization and biogenesis;cell proliferation;cellular component movement;cellular homeostasis;coagulation;metabolic process	51950.5	51193.5	57786.6	44270	40406.8	32234.6	67264	67209.5	56620	53643.6	38970.5	63697.8	1.37652	1.63452	-1.18743	0.00409419	0.0242613	0.00421723	0.063746
P08047	SP1	6667	Transcription factor Sp1 [OS=Homo sapiens]	coagulation;metabolic process	20539.8	18315.5	100219	11456.4	8652.65	58340.7	77135.5	16449.2	13912.1	46358.2	26149.9	35832.3	1.77279	1.37026	1.29376	0.810999	0.763044	0.763044	0.763044
Q68CZ6	HAUS3	79441	HAUS augmin-like complex subunit 3 [OS=Homo sapiens]	cell differentiation;cell growth;metabolic process	6961.09	14427.7	7321.05	5683.18	6472.91	6172.15	12061.4	9150.15	7303.37	9569.96	6109.42	9504.97	1.56643	1.55579	1.00684	0.297988	0.28353	0.28353	0.9783
Q9Y446	PKP3	11187	Plakophilin-3 [OS=Homo sapiens]	cell communication;cell growth;metabolic process	42798.7	24438.9	27907	21070.8	17587.1	31069.8	24011.1	24504.6	19091.9	31714.8	23242.6	22535.9	1.36452	-1.03136	1.4073	0.289724	0.29483	0.907521	0.29483
Q9BSH4	TACO1	51204	Translational activator of cytochrome c oxidase 1 [OS=Homo sapiens]	cell growth;metabolic process	191091	206202	183168	132549	182025	170706	138366	141734	135437	193487	161760	138512	1.19614	-1.16784	1.39689	0.0183685	0.085357	0.135591	0.0196088
P35249	RFC4	5984	Replication factor C subunit 4 [OS=Homo sapiens]	cell growth;cell proliferation;cellular homeostasis;coagulation;metabolic process	131930	178790	136020	86136	76092.7	93903.1	171481	147594	121974	148913	85377.3	147016	1.74418	1.72196	1.0129	0.0172679	0.0183864	0.0183864	0.916863
P60059	SEC61G	23480	Protein transport protein Sec61 subunit gamma [OS=Homo sapiens]	conjugation	27554.2	21901.7	22789	43922.6	33249.8	47311.1	34575.7	30100.5	25117.7	24081.6	41494.5	29931.3	-1.72308	-1.38632	-1.24291	0.0188737	0.0214712	0.0568052	0.22809
P05386	RPLP1	6176	60S acidic ribosomal protein P1 [OS=Homo sapiens]	cell organization and biogenesis;cellular homeostasis;metabolic process	76183.1	101011	129572	93388.2	38535.4	126090	125564	140583	100592	102255	86004.4	122246	1.18895	1.42139	-1.1955	0.433744	0.557284	0.557284	0.557284
Q9BVI4	NOC4L	79050	Nucleolar complex protein 4 homolog [OS=Homo sapiens]	cellular component movement;cellular homeostasis	43731.4	60970.6	46838.6	48626	23730.9	37520	76026.1	72890.2	60844.2	50513.5	36625.6	69920.2	1.37918	1.90905	-1.38419	0.0188417	0.14216	0.0201911	0.084388
O43491	EPB41L2	2037	Band 4.1-like protein 2 [OS=Homo sapiens]	cell differentiation;cell growth;metabolic process	195033	296473	232433	68373.4	58070.8	26609	164460	90991.3	179584	241313	51017.7	145012	4.72998	2.84238	1.66409	0.00445821	0.00446689	0.0343768	0.0343768
Q9HB40	SCPEP1	59342	Retinoid-inducible serine carboxypeptidase [OS=Homo sapiens]	cell organization and biogenesis;cellular homeostasis;metabolic process	336915	315198	311422	166108	152323	125683	156338	144120	182421	321178	148038	160960	2.16957	1.08729	1.9954	4.07247e-05	5.65796e-05	0.418104	5.65796e-05
Q7Z3B4	NUP54	53371	Nucleoporin p54 [OS=Homo sapiens]	cell growth;conjugation;metabolic process	39398.1	120509	24617.8	55629.8	17284.7	46336.6	70814.9	54438.4	98831.8	61508.3	39750.4	74695	1.54736	1.8791	-1.21439	0.497867	0.656162	0.656162	0.656162
Q96EY5	MVB12A	93343	Multivesicular body subunit 12A [OS=Homo sapiens]	cell growth;cell organization and biogenesis;cellular homeostasis;conjugation;metabolic process	7516.49	12502.3	7674.99	7544.37	7544.47	5827.01	6180.8	10458.9	8362.39	9231.25	6971.95	8334.02	1.32406	1.19536	1.10766	0.470554	0.62412	0.62412	0.62412
Q13416	ORC2	4999	Origin recognition complex subunit 2 [OS=Homo sapiens]	cell proliferation;cellular homeostasis;metabolic process	23263.8	27257.1	26671.2	15271.3	11365.7	16036	34030.2	27535.4	21850.7	25730.7	14224.3	27805.4	1.80892	1.95478	-1.08063	0.0122265	0.0187618	0.0179221	0.548962
Q96NT0	CCDC115	84317	Coiled-coil domain-containing protein 115 [OS=Homo sapiens]	cell growth;cell organization and biogenesis;cellular homeostasis;metabolic process	9647.29	7477.52	6796.55	9008.6	10008.9	12457.5	8056.04	6854.8	9741.98	7973.79	10491.7	8217.61	-1.31577	-1.27673	-1.03058	0.17893	0.191959	0.191959	0.856128
Q9H6Z4	RANBP3	8498	Ran-binding protein 3 [OS=Homo sapiens]	conjugation;metabolic process	241732	231186	244738	264734	174623	224479	283222	318124	245370	239219	221279	282239	1.08107	1.27549	-1.17984	0.154693	0.538878	0.206371	0.253885
Q9UMR2	DDX19B	11269	ATP-dependent RNA helicase DDX19B [OS=Homo sapiens]	cellular homeostasis;conjugation	23945.8	21962.2	22159.8	16354.5	18254.5	13588.3	14058.7	15178.4	17804.1	22689.3	16065.8	15680.4	1.41227	-1.02458	1.44698	0.00607676	0.00717271	0.808314	0.00717271
Q14318	FKBP8	23770	Peptidyl-prolyl cis-trans isomerase FKBP8 [OS=Homo sapiens]	cell organization and biogenesis;cellular homeostasis;defense response;development;metabolic process	168091	194678	188728	232584	198599	186618	171235	130255	169192	183833	205934	156894	-1.12022	-1.31257	1.1717	0.0727322	0.240648	0.0831791	0.240648
Q01968	OCRL	4952	Inositol polyphosphate 5-phosphatase OCRL [OS=Homo sapiens]	cell growth;cellular homeostasis;development;metabolic process	17839.5	19511.4	21214.1	29196.9	14104.9	25103.4	16110.2	17456.4	17657	19521.7	22801.7	17074.5	-1.16802	-1.33542	1.14332	0.376995	0.541863	0.541863	0.541863
Q7KZI7	MARK2	2011	Serine/threonine-protein kinase MARK2 [OS=Homo sapiens]	cell death;cell growth;cell organization and biogenesis;cellular homeostasis;defense response;development;metabolic process	56695.5	49649.2	30768.7	14393.9	23478.7	37887.4	28861.3	31073.8	39087	45704.5	25253.3	33007.4	1.80984	1.30705	1.38467	0.14211	0.177809	0.412481	0.299194
O14545	TRAFD1	10906	TRAF-type zinc finger domain-containing protein 1 [OS=Homo sapiens]	metabolic process	15667.4	17617.6	15514.4	14129.4	15217.7	15232.5	17168	19962.8	21467.4	16266.5	14859.9	19532.8	1.09466	1.31446	-1.2008	0.0207641	0.287414	0.0245802	0.0526308
Q9Y399	MRPS2	51116	28S ribosomal protein S2, mitochondrial [OS=Homo sapiens]	cell growth;cell organization and biogenesis;cellular homeostasis	135576	148379	177781	111714	87313.5	120765	123368	137771	120853	153912	106597	127331	1.44387	1.1945	1.20876	0.0376705	0.0413686	0.182355	0.152139
Q14160	SCRIB	23513	Protein scribble homolog [OS=Homo sapiens]	cell communication;cell death;cell differentiation;cell growth;coagulation;conjugation;defense response;metabolic process	67557.8	69436.8	73798.2	72515.5	32191.2	62213.8	53878.1	52137.9	47340.6	70264.2	55640.2	51118.8	1.26283	-1.08845	1.37453	0.221723	0.297702	0.670639	0.297702
Q9Y5R8	TRAPPC1	58485	Trafficking protein particle complex subunit 1 [OS=Homo sapiens]	conjugation	30464.2	37377.9	34195.4	27236.6	25601.8	26797.4	40779	31960.9	43868.3	34012.5	26545.3	38869.4	1.2813	1.46427	-1.1428	0.028529	0.102171	0.0315346	0.198715
P21953	BCKDHB	594	2-oxoisovalerate dehydrogenase subunit beta, mitochondrial [OS=Homo sapiens]	cellular homeostasis;metabolic process	13393.1	24164.5	19732.3	15254.6	16275.1	10266.7	9661.57	7644.7	6407.66	19096.6	13932.1	7904.64	1.37069	-1.76253	2.41588	0.029867	0.143242	0.143242	0.0321741
Q9BRT6	LLPH	84298	Protein LLP homolog [OS=Homo sapiens]	cell growth;defense response;metabolic process	138659	137849	142109	98144.4	86956.5	88735.1	179629	214078	154102	139539	91278.7	182603	1.52872	2.0005	-1.30862	0.0022681	0.023815	0.00224662	0.0250128
O95149	SNUPN	10073	Snurportin-1 [OS=Homo sapiens]	conjugation	17942	14084	17065	4487.35	6043.21	6810.3	20813.9	24925.3	15904.5	16363.7	5780.29	20547.9	2.83094	3.55482	-1.2557	0.00217892	0.00676102	0.0025258	0.131686
Q9H8H3	METTL7A	25840	Methyltransferase-like protein 7A [OS=Homo sapiens]	cellular homeostasis	549600	527737	495625	456684	512290	397733	383006	395801	366550	524321	455569	381786	1.15091	-1.19326	1.37334	0.0102711	0.0662173	0.0662173	0.0105455
Q9BV86	NTMT1	28989	N-terminal Xaa-Pro-Lys N-methyltransferase 1 [OS=Homo sapiens]	cell differentiation;cell growth;cell organization and biogenesis;cellular homeostasis;metabolic process	87492.6	112003	82117.3	56984.3	112465	69369.1	95483.1	139144	102002	93870.9	79606	112210	1.17919	1.40956	-1.19536	0.306134	0.48528	0.420544	0.48528
Q9NRF9	POLE3	54107	DNA polymerase epsilon subunit 3 [OS=Homo sapiens]	cell growth;cell organization and biogenesis;cell proliferation;cellular homeostasis;coagulation	9085.86	9106.54	9648.46	4433.54	6322.14	7011.08	13372.5	11680.1	9568.38	9280.29	5922.25	11540.3	1.56702	1.94864	-1.24353	0.00654179	0.0345005	0.00683164	0.0872638
Q86VN1	VPS36	51028	Vacuolar protein-sorting-associated protein 36 [OS=Homo sapiens]	cell growth;cell organization and biogenesis;cellular homeostasis;conjugation	74562.7	64414.6	33916.2	31698.9	74157.9	69413.3	89992.9	66776.3	79897.9	57631.2	58423.4	78889.1	-1.01375	1.3503	-1.36886	0.374367	0.961655	0.364497	0.364497
O75208	COQ9	57017	Ubiquinone biosynthesis protein COQ9, mitochondrial [OS=Homo sapiens]	cellular homeostasis	21305.4	28429.9	20718.2	23244.3	36476.7	14886.6	18771.8	19553.4	15464.2	23484.5	24869.2	17929.8	-1.05896	-1.38703	1.3098	0.470577	0.813287	0.540581	0.540581
Q6NUQ4	TMEM214	54867	Transmembrane protein 214 [OS=Homo sapiens]	metabolic process	209496	192230	194896	154560	118653	170421	205899	224514	195433	198874	147878	208615	1.34485	1.41072	-1.04898	0.013785	0.021497	0.0199393	0.539006
Q15386	UBE3C	9690	Ubiquitin-protein ligase E3C [OS=Homo sapiens]	cell organization and biogenesis;cellular homeostasis	14649	14368.5	16683.4	9670.78	8393.65	4975.87	12954.9	11304.8	10034.4	15233.6	7680.1	11431.4	1.98352	1.48844	1.33262	0.0062034	0.00626737	0.0426814	0.0426814
Q9C0E2	XPO4	64328	Exportin-4 [OS=Homo sapiens]	conjugation;metabolic process	5397.51	7857.77	9475.98	4231.04	3427.54	11896.4	4951.97	6163.53	3512.4	7577.09	6518.33	4875.97	1.16243	-1.33683	1.55397	0.579196	0.685162	0.685162	0.685162
P04049	RAF1	5894	RAF proto-oncogene serine/threonine-protein kinase [OS=Homo sapiens]	cell death;cell growth;cell organization and biogenesis;cellular homeostasis;coagulation;conjugation;defense response;development;metabolic process	42499	24995.8	34107.1	18614.8	20847.7	21533	35890.4	43661.3	38852.8	33867.3	20331.8	39468.2	1.66573	1.9412	-1.16538	0.0147453	0.0381151	0.0174527	0.267099
O60231	DHX16	8449	Pre-mRNA-splicing factor ATP-dependent RNA helicase DHX16 [OS=Homo sapiens]	cellular component movement;cellular homeostasis	24278.5	35403.8	30097.2	13067.9	16860.7	11712.2	29354.2	21577.6	31089.7	29926.5	13880.3	27340.5	2.15604	1.96974	1.09458	0.0110252	0.015906	0.0175441	0.517703
Q15370	ELOB	6923	Elongin-B [OS=Homo sapiens]	cell growth;cell organization and biogenesis;cellular component movement;cellular homeostasis;metabolic process	159711	95686.2	135468	98128.1	101551	49777.3	130319	159711	125359	130288	83152.3	138463	1.56687	1.66518	-1.06275	0.0938945	0.117692	0.117692	0.725936
Q96DT6	ATG4C	84938	Cysteine protease ATG4C [OS=Homo sapiens]	cell organization and biogenesis;cellular homeostasis;conjugation	3558.68	3691.45	4483.67	2779.76	4063.08	4610.78	4390.56	4346.95	2543.18	3911.27	3817.87	3760.23	1.02446	-1.01533	1.04017	0.977063	0.937607	0.937607	0.937607
Q8N8N7	PTGR2	145482	Prostaglandin reductase 2 [OS=Homo sapiens]	cellular homeostasis	80495	71291.3	71298	73558.2	121207	85191.5	83159.7	80879	98954.1	74361.4	93318.9	87664.3	-1.25494	-1.0645	-1.17889	0.378169	0.510341	0.675149	0.510341
Q8NAA5	LRRC75A	388341	Leucine-rich repeat-containing protein 75A [OS=Homo sapiens]		10241.9	18113.9	18414.9	14060.4	6201.53	14163.5	18143.6	16392	15786.1	15590.2	11475.2	16773.9	1.35861	1.46175	-1.07592	0.27955	0.35316	0.35316	0.717567
P62304	SNRPE	6635	Small nuclear ribonucleoprotein E [OS=Homo sapiens]	cell growth;cellular component movement;cellular homeostasis;metabolic process	86324.8	46902.1	140591	63531.3	21201.2	125565	75374	118180	53139.9	91272.6	70099.1	82231.3	1.30205	1.17307	1.10995	0.849508	0.813616	0.813616	0.813616
Q99504	EYA3	2140	Eyes absent homolog 3 [OS=Homo sapiens]	cell organization and biogenesis;cell proliferation;cellular homeostasis;coagulation;metabolic process	9882.89	9832.24	12013.5	5845.64	5804.11	4002.21	12261.9	8105.91	9356.96	10576.2	5217.32	9908.25	2.02714	1.89911	1.06742	0.0106056	0.0149983	0.0149983	0.616491
P32321	DCTD	1635	Deoxycytidylate deaminase [OS=Homo sapiens]	cellular homeostasis	137091	155414	115505	112156	131928	68766.4	108879	119702	96118.4	136003	104284	108233	1.30417	1.03787	1.25658	0.260107	0.283677	0.840151	0.283677
Q9BS26	ERP44	23071	Endoplasmic reticulum resident protein 44 [OS=Homo sapiens]	cell organization and biogenesis;cellular homeostasis;coagulation;metabolic process	16447.8	3905.06	15876.7	16942.7	6535.53	11086.5	11181.1	16296.9	12027.6	12076.5	11521.6	13168.5	1.04817	1.14295	-1.09042	0.929112	0.902511	0.902511	0.902511
O95757	HSPA4L	22824	Heat shock 70 kDa protein 4L [OS=Homo sapiens]	coagulation;metabolic process	7778.65	12010.3	4736.42	11777	12869	13288.5	10801.4	11236.4	7782.16	8175.13	12644.8	9939.99	-1.54674	-1.27212	-1.21588	0.153135	0.191803	0.32879	0.405206
Q6NXG1	ESRP1	54845	Epithelial splicing regulatory protein 1 [OS=Homo sapiens]	cellular component movement;cellular homeostasis;metabolic process	33311.8	32034.6	33219.9	9416.46	4429.14	5746.69	26495.7	27973.4	25273.7	32855.4	6530.76	26580.9	5.03087	4.07011	1.23605	3.82911e-06	4.67537e-06	1.15948e-05	0.00440801
Q15773	MLF2	8079	Myeloid leukemia factor 2 [OS=Homo sapiens]	metabolic process	3988.33	7308.56	6874.62	8627.59	8838.07	5224.56	8191.17	9388.34	9359.34	6057.17	7563.41	8979.62	-1.24867	1.18724	-1.48248	0.166544	0.324468	0.324468	0.206159
Q16537	PPP2R5E	5529	Serine/threonine-protein phosphatase 2A 56 kDa regulatory subunit epsilon isoform [OS=Homo sapiens]	cell organization and biogenesis;cellular homeostasis;development;metabolic process	49402.6	66238.2	54517.2	54547.5	54635.7	33915.4	74202	60080.2	80287.1	56719.3	47699.5	71523.1	1.1891	1.49945	-1.261	0.0782767	0.329003	0.0928012	0.197835
Q9Y6Y0	IVNS1ABP	10625	Influenza virus NS1A-binding protein [OS=Homo sapiens]	cellular component movement;cellular homeostasis;metabolic process	4174.51	2994.42	3836.04	4058.38	3818.9	3091.95	13250.4	16453.6	5207.77	3668.32	3656.41	11637.3	1.00326	3.1827	-3.17237	0.0427426	0.996692	0.041486	0.041486
P34949	MPI	4351	Mannose-6-phosphate isomerase [OS=Homo sapiens]	cell organization and biogenesis;cellular homeostasis	35534.9	45065	22820.5	206649	260363	181793	140824	126601	78689.7	34473.5	216268	115372	-6.27347	-1.87453	-3.34668	0.00103129	0.00101698	0.010123	0.0175785
Q9UDR5	AASS	10157	Alpha-aminoadipic semialdehyde synthase, mitochondrial [OS=Homo sapiens]	cellular homeostasis;metabolic process	12606.5	10911.2	12047	4108.24	7637.38	3880.54	5159.37	5530.05	5588.88	11854.9	5208.72	5426.1	2.27597	1.04173	2.18479	0.00129795	0.0014995	0.846961	0.0014995
Q16877	PFKFB4	5210	6-phosphofructo-2-kinase/fructose-2,6-bisphosphatase 4 [OS=Homo sapiens]	cellular homeostasis	101697	103605	86147.4	137985	160779	137623	194321	217125	171408	97149.5	145462	194285	-1.4973	1.33564	-1.99985	0.00101348	0.0107593	0.0107593	0.000988276
P50148	GNAQ	2776	Guanine nucleotide-binding protein G(q) subunit alpha [OS=Homo sapiens]	cell death;coagulation;development;metabolic process	248493	269588	237971	213845	220777	192959	121891	106322	217848	252017	209194	148687	1.20471	-1.40694	1.69495	0.0383985	0.206583	0.138556	0.042627
Q8TED1	GPX8	493869	Probable glutathione peroxidase 8 [OS=Homo sapiens]	coagulation;metabolic process	54793.5	49058.9	49431.8	46850.5	45808.5	39406.4	40923.7	42078.1	32053.4	51094.7	44021.8	38351.8	1.16067	-1.14784	1.33227	0.0317112	0.139828	0.161079	0.0344206
O43237	DYNC1LI2	1783	Cytoplasmic dynein 1 light intermediate chain 2 [OS=Homo sapiens]	cell growth;metabolic process	77010.9	99712.8	73074.9	93709.8	72389.9	79383.1	74966	62547.9	65587.3	83266.2	81827.6	67700.4	1.01758	-1.20867	1.22992	0.241764	0.878622	0.25298	0.25298
Q9H061	TMEM126A	84233	Transmembrane protein 126A [OS=Homo sapiens]	cell growth;defense response	66303.8	60026.4	63203.1	55088.5	33154.2	42292.1	48447.4	56961.2	42585.6	63177.8	43511.6	49331.4	1.45197	1.13375	1.28068	0.052622	0.0650117	0.397232	0.109843
Q9NZ32	ACTR10	55860	Actin-related protein 10 [OS=Homo sapiens]	conjugation;metabolic process	27003.1	19436.9	20193.8	11091.2	10551.9	14422.7	19400.3	19134.5	12229.3	22211.3	12022	16921.4	1.84755	1.40754	1.31262	0.0357839	0.0388035	0.144035	0.144035
Q9HA64	FN3KRP	79672	Ketosamine-3-kinase [OS=Homo sapiens]	cell organization and biogenesis;cellular homeostasis	15383.6	15057.1	17837.2	18199.2	14854.1	15435.6	23354.2	22569.9	17180.5	16092.6	16163	21034.8	-1.00437	1.30142	-1.30711	0.069388	0.972145	0.0677956	0.0677956
Q9NVD7	PARVA	55742	Alpha-parvin [OS=Homo sapiens]	cell communication;cell growth;defense response;metabolic process	5626.99	7083.46	5883.15	7336.33	7386.56	6676.77	6822.87	6020.07	8245.91	6197.86	7133.22	7029.62	-1.15092	-1.01474	-1.1342	0.373869	0.393083	0.882529	0.393083
Q9H8T0	AKTIP	64400	AKT-interacting protein [OS=Homo sapiens]	cell growth;cell organization and biogenesis;cellular homeostasis;conjugation;metabolic process	11918.2	19703.5	14738.3	9124.54	10673.5	6903.42	11194	6502.66	6185.74	15453.3	8900.5	7960.81	1.73623	-1.11804	1.94118	0.0431235	0.0551295	0.714443	0.0551295
Q6PI48	DARS2	55157	Aspartate--tRNA ligase, mitochondrial [OS=Homo sapiens]	cell organization and biogenesis;cellular component movement;cellular homeostasis	48730.8	51452.3	39136.5	27773.7	32388.7	27462.8	27784.8	28891.4	29093.6	46439.9	29208.4	28589.9	1.58995	-1.02163	1.62434	0.00271989	0.00310744	0.858861	0.00310744
O14737	PDCD5	9141	Programmed cell death protein 5 [OS=Homo sapiens]	metabolic process	57472.4	7024.2	8179.24	72346.8	81591.1	159332	98351.6	11634.8	12686.9	24225.3	104423	40891.1	-4.3105	-2.55369	-1.68795	0.132522	0.182216	0.182216	0.652985
O43324	EEF1E1	9521	Eukaryotic translation elongation factor 1 epsilon-1 [OS=Homo sapiens]	cell organization and biogenesis;cellular homeostasis;metabolic process	389078	360456	496344	299377	322498	555077	510931	490226	402356	415293	392317	467838	1.05856	1.1925	-1.12653	0.643984	0.782363	0.782363	0.782363
Q92917	GPKOW	27238	G-patch domain and KOW motifs-containing protein [OS=Homo sapiens]	cellular component movement;cellular homeostasis	79392.4	67045.8	62747.3	57829.3	40613.4	67450	81403.2	72615.1	69332.6	69728.5	55297.6	74450.3	1.26097	1.34636	-1.06772	0.124865	0.190174	0.170774	0.583165
P17612	PRKACA	5566	cAMP-dependent protein kinase catalytic subunit alpha [OS=Homo sapiens]	cell growth;cell organization and biogenesis;cellular component movement;cellular homeostasis;coagulation;defense response;development;metabolic process	30543.8	51843.2	34637	23324.5	18787.8	26043	10459.3	27676.1	27415.6	39008	22718.4	21850.4	1.71702	-1.03973	1.78523	0.0971951	0.0998656	0.908982	0.0998656
P49458	SRP9	6726	Signal recognition particle 9 kDa protein [OS=Homo sapiens]	conjugation;metabolic process	41898.4	238162	314051	340404	349527	633140	369507	49134.3	43083.9	198037	441024	153908	-2.22697	-2.8655	1.28672	0.152586	0.183747	0.183747	0.755268
Q96BN8	OTULIN	90268	Ubiquitin thioesterase otulin [OS=Homo sapiens]	cell death;cell organization and biogenesis;cellular homeostasis;coagulation;defense response;development;metabolic process	108951	90789.8	92264.2	30442.6	119246	79889.8	113930	111352	119359	97334.9	76526.2	114881	1.27192	1.50119	-1.18026	0.280837	0.447533	0.378158	0.447533
P50226	SULT1A2	6799	Sulfotransferase 1A2 [OS=Homo sapiens]	cellular homeostasis	202949	227243	196858	195838	248451	173335	215386	206320	204856	209016	205875	208854	1.01526	1.01447	1.00078	0.98432	0.993743	0.993743	0.993743
Q9Y6Y8	SEC23IP	11196	SEC23-interacting protein [OS=Homo sapiens]	cell growth;conjugation	61813.5	24054.5	25833.7	19935.1	23486.8	20214.7	22983.9	24208.7	22600.8	37233.9	21212.2	23264.5	1.7553	1.09675	1.60046	0.297893	0.323498	0.845612	0.323498
Q8IWA4	MFN1	55669	Mitofusin-1 [OS=Homo sapiens]	cell growth;cellular homeostasis;metabolic process	49201.4	55136.3	46479.8	43175.8	46333.5	33989.7	46834	43165.5	45548.2	50272.5	41166.3	45182.5	1.2212	1.09756	1.11265	0.130099	0.157451	0.328485	0.328485
Q9Y5K5	UCHL5	51377	Ubiquitin carboxyl-terminal hydrolase isozyme L5 [OS=Homo sapiens]	cell organization and biogenesis;cell proliferation;cellular homeostasis;coagulation;defense response;metabolic process	479734	493561	394039	439520	383919	429441	435217	463683	467821	455778	417627	455574	1.09135	1.09086	1.00045	0.403577	0.383056	0.383056	0.99482
Q9H3P2	NELFA	7469	Negative elongation factor A [OS=Homo sapiens]	defense response;metabolic process	97510.2	97744	155534	73616.7	29471.1	114550	135154	171667	42499.1	116929	72546	116440	1.6118	1.60505	1.0042	0.494402	0.47924	0.47924	0.990741
P82909	MRPS36	92259	28S ribosomal protein S36, mitochondrial [OS=Homo sapiens]	cell organization and biogenesis;cellular homeostasis	21814	25261.7	42105.6	14776.9	14684.6	19755.6	27016.4	27686.1	15557.2	29727.1	16405.7	23419.9	1.812	1.42755	1.26931	0.18003	0.22538	0.348025	0.348025
Q9UPT5	EXOC7	23265	Exocyst complex component 7 [OS=Homo sapiens]	conjugation;metabolic process	99899.3	64331.2	41032.4	11330.7	34541.2	13965.2	57596.1	177348	40596.4	68421	19945.7	91846.8	3.43036	4.60484	-1.34238	0.238879	0.378566	0.328328	0.563058
Q9NVX2	NLE1	54475	Notchless protein homolog 1 [OS=Homo sapiens]	cell growth;defense response;development;metabolic process	87668.7	90278.6	23272.7	26227.5	29023.1	61961.3	105023	85683.6	81577.9	67073.4	39070.6	90761.7	1.71672	2.32301	-1.35317	0.123475	0.303252	0.148027	0.303252
Q96JB2	COG3	83548	Conserved oligomeric Golgi complex subunit 3 [OS=Homo sapiens]	cell growth;cell organization and biogenesis;cellular homeostasis;conjugation;metabolic process	52692.3	81362.6	53266.2	53736	36580.3	28582.4	44460.8	41621.3	23681.8	62440.4	39632.9	36588	1.57547	-1.08322	1.70658	0.113058	0.130589	0.794172	0.130589
Q9H2J4	PDCL3	79031	Phosducin-like protein 3 [OS=Homo sapiens]	cell growth;coagulation;defense response;metabolic process	3765.72	5122.78	4076.92	2570.51	4335.49	3631.66	5256.41	3514.65	4714.78	4321.81	3512.55	4495.28	1.23039	1.27978	-1.04014	0.368341	0.419785	0.419785	0.807548
Q9NXJ5	PGPEP1	54858	Pyroglutamyl-peptidase 1 [OS=Homo sapiens]	cell organization and biogenesis	3308.09	5011.23	2761.78	3669.12	7200.08	2712.86	5103.03	5086.88	3665.05	3693.7	4527.35	4618.32	-1.22569	1.02009	-1.25032	0.747402	0.819079	0.946625	0.819079
Q8N442	GUF1	60558	Translation factor GUF1, mitochondrial [OS=Homo sapiens]	cell organization and biogenesis;cellular homeostasis;metabolic process	9247.1	9257.43	3973.05	3741.07	3547.6	3954.57	7164.64	7321.27	3696.32	7492.53	3747.75	6060.74	1.99921	1.61717	1.23624	0.173871	0.22235	0.345951	0.440559
Q92600	CNOT9	9125	CCR4-NOT transcription complex subunit 9 [OS=Homo sapiens]	cellular component movement;cellular homeostasis;development;metabolic process	22736.3	21839.4	23976.1	10518.7	6993.88	36520.7	31902.8	28730.7	21149.5	22850.6	18011.1	27261	1.2687	1.51357	-1.19301	0.550548	0.603626	0.603626	0.603626
Q96S99	PLEKHF1	79156	Pleckstrin homology domain-containing family F member 1 [OS=Homo sapiens]	cell growth;metabolic process	23506.3	15398.4	24530.9	8566.8	10414.2	7214.27	26535.9	27787.7	23617.5	21145.2	8731.77	25980.4	2.42164	2.97538	-1.22866	0.00170074	0.00530402	0.00197503	0.120643
Q6BCY4	CYB5R2	51700	NADH-cytochrome b5 reductase 2 [OS=Homo sapiens]	cellular homeostasis;conjugation	221331	184276	164351	389338	614102	438993	297788	315216	280283	189986	480811	297762	-2.53077	-1.61475	-1.56728	0.00671792	0.00718756	0.0292798	0.111972
Q92797	SYMPK	8189	Symplekin [OS=Homo sapiens]	cell communication;cellular component movement;cellular homeostasis;metabolic process	220912	248874	238011	193957	75537.9	174371	183653	178942	203038	235933	147955	188544	1.59462	1.27433	1.25134	0.0795986	0.0914897	0.241503	0.241503
Q16637	SMN1; SMN2	6606; 6607	Survival motor neuron protein [OS=Homo sapiens]	cell growth;cellular component movement;cellular homeostasis;defense response	39430.8	41587.3	42066.7	39092.5	19512.4	32108.3	39134.2	37041.3	40979.5	41028.3	30237.8	39051.6	1.35686	1.29149	1.05062	0.13505	0.175347	0.175347	0.695676
Q96BP3	PPWD1	23398	Peptidylprolyl isomerase domain and WD repeat-containing protein 1 [OS=Homo sapiens]	cell organization and biogenesis;cellular component movement;cellular homeostasis	19811.2	27518	27422.1	17400.5	10009.6	13432.1	18596.2	23114.5	15902.6	24917.1	13614.1	19204.4	1.83025	1.41063	1.29747	0.034901	0.0377564	0.132736	0.132736
Q9HBL8	NMRAL1	57407	NmrA-like family domain-containing protein 1 [OS=Homo sapiens]		18608.9	17302.4	22935.5	8086.48	4986.73	6035.32	29622.9	26899	12937.4	19615.6	6369.51	23153.1	3.0796	3.63499	-1.18034	0.021942	0.0388867	0.0293472	0.462127
P07902	GALT	2592	Galactose-1-phosphate uridylyltransferase [OS=Homo sapiens]	cellular homeostasis	55200.6	59142.5	51288.9	23974.7	38766.7	40661.2	62591.9	69882.7	58208.9	55210.7	34467.5	63561.2	1.60182	1.84409	-1.15125	0.00454582	0.0133573	0.00529289	0.176363
Q9BW92	TARS2	80222	Threonine--tRNA ligase, mitochondrial [OS=Homo sapiens]	cell organization and biogenesis;cellular component movement;cellular homeostasis	115727	87837.8	54083.7	46091.6	49069.1	26667.9	71477	65597	65149.7	85882.9	40609.5	67407.9	2.11485	1.6599	1.27408	0.0726686	0.0843572	0.208975	0.284664
Q9NUW8	TDP1	55775	Tyrosyl-DNA phosphodiesterase 1 [OS=Homo sapiens]	cell proliferation;cellular homeostasis;coagulation	15736.9	17036.9	17078.2	14611.5	15527.5	16505.1	17646.6	16758.5	17287.8	16617.3	15548	17231	1.06877	1.10824	-1.03693	0.0825441	0.195783	0.0991051	0.353731
Q96EP5	DAZAP1	26528	DAZ-associated protein 1 [OS=Homo sapiens]	cell differentiation;defense response;metabolic process	1.13315e+06	1.15663e+06	1.09502e+06	744564	324429	714701	740167	785881	706144	1.12827e+06	594565	744064	1.89763	1.25144	1.51636	0.00822819	0.00976849	0.234234	0.0217911
Q9BUT1	BDH2	56898	3-hydroxybutyrate dehydrogenase type 2 [OS=Homo sapiens]	cellular homeostasis;metabolic process	4393.13	2859.21	3113.36	4287	6626.26	6454.15	4015.47	5417.49	3071.15	3455.24	5789.14	4168.03	-1.67547	-1.38894	-1.2063	0.102247	0.130458	0.190355	0.465682
Q9Y3D8	AK6	102157402	Adenylate kinase isoenzyme 6 [OS=Homo sapiens]	cellular homeostasis	12069.6	7536.15	16602.7	8964.23	6140.91	14486.8	16597.5	16829.6	11374.9	12069.5	9863.99	14934	1.22359	1.51399	-1.23734	0.361954	0.525001	0.515654	0.525001
Q96MN2	NLRP4	147945	NACHT, LRR and PYD domains-containing protein 4 [OS=Homo sapiens]	coagulation	11548.2	16243	10361.5	7763.84	10151.6	13454.5	17364.2	14853.7	16821.2	12717.6	10456.6	16346.3	1.21622	1.56325	-1.28534	0.0768222	0.320073	0.0906713	0.198909
Q01970	PLCB3	5331	1-phosphatidylinositol 4,5-bisphosphate phosphodiesterase beta-3 [OS=Homo sapiens]	cellular homeostasis;development;metabolic process	36983.5	47740.8	38971.4	27451.8	29257.8	8031.76	12560.3	20293.8	31908.9	41231.9	21580.5	21587.7	1.91061	1.00034	1.90997	0.0679389	0.0648354	0.999279	0.0648354
Q9Y6W5	WASF2	10163	Wiskott-Aldrich syndrome protein family member 2 [OS=Homo sapiens]	cell growth;conjugation;defense response;development;metabolic process	42168.7	46485.2	44156.4	55518.6	53492.8	57907.2	41750.2	38787.6	45370	44270.1	55639.5	41969.3	-1.25682	-1.32572	1.05482	0.00143237	0.00264833	0.00202712	0.321573
Q9UKD2	MRTO4	51154	mRNA turnover protein 4 homolog [OS=Homo sapiens]	cell growth;cellular component movement;cellular homeostasis;metabolic process	41814	41196.5	46490.7	29915.8	19024.7	27592.6	28880.1	51098.6	39788.6	43167.1	25511	39922.4	1.69209	1.56491	1.08127	0.0563279	0.0800674	0.0819244	0.611043
Q9BYX2	TBC1D2	55357	TBC1 domain family member 2A [OS=Homo sapiens]	conjugation;metabolic process	5899.79	8400.28	6730.76	5330.2	5743	6324.72	4809.6	4755.48	5108.98	7010.27	5799.31	4891.36	1.20881	-1.18562	1.4332	0.0466821	0.168356	0.212605	0.0521083
Q9BXR0	QTRT1	81890	Queuine tRNA-ribosyltransferase catalytic subunit 1 [OS=Homo sapiens]	cellular component movement;cellular homeostasis	57586.1	49109.3	48539	43297.2	35476.1	24804.6	46676.2	50188.3	39865.5	51744.8	34526	45576.7	1.49872	1.32007	1.13534	0.0544696	0.0638513	0.141443	0.310185
Q9Y450	HBS1L	10767	HBS1-like protein [OS=Homo sapiens]	cell organization and biogenesis;cellular homeostasis;development	52820.7	56240.6	49126.2	48825.8	47276	45549.8	50403	54534.1	52606.9	52729.2	47217.2	52514.7	1.11674	1.11219	1.00408	0.06472	0.0663793	0.0663793	0.921529
Q9NVM6	DNAJC17	55192	DnaJ homolog subfamily C member 17 [OS=Homo sapiens]	conjugation;metabolic process	11906.4	13124.2	12529	5712.77	3112.44	9387.65	13730.2	15056.4	11169.7	12519.8	6070.95	13318.8	2.06225	2.19385	-1.06381	0.0122924	0.016479	0.016479	0.668845
Q8IVM0	CCDC50	152137	Coiled-coil domain-containing protein 50 [OS=Homo sapiens]	metabolic process	21640.7	21731.8	15246.4	14959.4	11427.8	11784.3	19289.1	20747.9	20037.1	19539.6	12723.8	20024.7	1.53567	1.57379	-1.02482	0.0188661	0.021881	0.021881	0.817147
Q5SWX8	ODR4	54953	Protein odr-4 homolog [OS=Homo sapiens]	metabolic process	119661	18922.2	8992.48	108755	149318	92665.2	84925.6	14219.9	86629.9	49191.7	116913	61925.1	-2.37667	-1.88797	-1.25885	0.236984	0.2885	0.2885	0.745391
Q9Y4B6	DCAF1	9730	DDB1- and CUL4-associated factor 1 [OS=Homo sapiens]	cell organization and biogenesis;cell proliferation;cellular homeostasis;defense response;metabolic process	22760.1	17184.8	20154.4	12847.2	10685.4	14198.6	19468.2	22611.4	16993	20033.1	12577.1	19690.9	1.59283	1.56562	1.01738	0.017941	0.0198178	0.0198178	0.872697
Q658Y4	FAM91A1	157769	Protein FAM91A1 [OS=Homo sapiens]	cell growth;conjugation	13914.7	11312.3	15864.1	12338.4	8491.1	8959.88	15506.6	14875.2	13873.1	13697	9929.8	14751.6	1.37938	1.48559	-1.077	0.0422298	0.0707356	0.0567105	0.511831
Q8NBZ7	UXS1	80146	UDP-glucuronic acid decarboxylase 1 [OS=Homo sapiens]	cellular homeostasis	49467.6	45263.7	35070.3	40901.8	115470	18621.6	48951.7	42080.4	39144	43267.2	58331.3	43392.1	-1.34816	-1.34429	-1.00289	0.783264	0.841449	0.841449	0.996064
Q9NWW5	CLN6	54982	Ceroid-lipofuscinosis neuronal protein 6 [OS=Homo sapiens]	cell growth;cell organization and biogenesis;cellular homeostasis;metabolic process	153060	114698	143253	111058	164705	136880	103350	153394	108197	137003	137548	121647	-1.00397	-1.13071	1.12624	0.692826	0.979613	0.721131	0.721131
Q68CQ7	GLT8D1	55830	Glycosyltransferase 8 domain-containing protein 1 [OS=Homo sapiens]		9137.73	8599.05	9215.03	14550.4	12510.7	12357.1	14460.5	12784.5	13182.2	8983.94	13139.4	13475.8	-1.46255	1.0256	-1.49998	0.0014209	0.00186355	0.659955	0.00186355
Q14353	GAMT	2593	Guanidinoacetate N-methyltransferase [OS=Homo sapiens]	cellular homeostasis;defense response;metabolic process	61265	52266.4	47730	9389.1	24845.9	44250.8	83221.2	83971.3	25040	53753.8	26161.9	64077.5	2.05466	2.44926	-1.19206	0.180117	0.271397	0.2483	0.591745
Q92990	GLMN	11146	Glomulin [OS=Homo sapiens]	cell growth;defense response;development;metabolic process	91469.1	88796.6	90354.4	63196.2	61839.6	56660.8	120501	122079	92188.1	90206.7	60565.5	111589	1.48941	1.84246	-1.23704	0.00224233	0.0160425	0.00226597	0.0388676
P37235	HPCAL1	3241	Hippocalcin-like protein 1 [OS=Homo sapiens]		41445.1	56277.5	31694	155505	138249	147819	51374.7	57971.5	71423.3	43138.9	147191	60256.5	-3.41203	-2.44275	-1.3968	4.05954e-05	5.78671e-05	8.13765e-05	0.0934922
P01024	C3	718	Complement C3 [OS=Homo sapiens]	cell death;cell growth;cellular homeostasis;coagulation;defense response;development;metabolic process	127462	142244	68721.9	866558	2.82293e+06	1.18564e+06	1.13136e+06	764407	1.62051e+06	112809	1.62504e+06	1.17209e+06	-14.4052	-1.38645	-10.39	0.0720333	0.0902268	0.429604	0.142486
Q68D91	MBLAC2	153364	Metallo-beta-lactamase domain-containing protein 2 [OS=Homo sapiens]		11439	11109.6	13441	22909.3	17225.3	15315.8	10761.7	10964.3	12085.6	11996.5	18483.5	11270.5	-1.54073	-1.63998	1.06441	0.0201841	0.0255338	0.0255338	0.726905
Q6ZSR9	0	0	Uncharacterized protein FLJ45252 [OS=Homo sapiens]		101139	110005	119423	94935.7	63735	65255.7	117105	120949	117158	110189	74642.1	118404	1.47623	1.58629	-1.07456	0.00763228	0.0137675	0.010469	0.415896
Q9NTJ3	SMC4	10051	Structural maintenance of chromosomes protein 4 [OS=Homo sapiens]	cell differentiation;cell growth;metabolic process	618076	483835	537170	944421	190566	1.18715e+06	560227	680810	548828	546360	774045	596622	-1.41673	-1.29738	-1.09199	0.651879	0.755401	0.755401	0.846965
Q9UGJ1	TUBGCP4	27229	Gamma-tubulin complex component 4 [OS=Homo sapiens]	cell differentiation;cell growth	7329.58	7419.32	7276.29	2830.03	2616.74	4776.38	12280.5	8435.8	7600.5	7341.73	3407.72	9438.92	2.15444	2.76987	-1.28565	0.00978306	0.0352357	0.0107871	0.158896
O95834	EML2	24139	Echinoderm microtubule-associated protein-like 2 [OS=Homo sapiens]	cell growth;metabolic process	73932.4	67314.4	45455.7	67194	85374.3	72411.3	77849.3	50632.5	63808.6	62234.2	74993.2	64096.8	-1.20502	-1.17	-1.02993	0.468127	0.508299	0.508299	0.864882
Q9Y6A4	CFAP20	29105	Cilia- and flagella-associated protein 20 [OS=Homo sapiens]	cell growth;cell organization and biogenesis;cellular homeostasis;defense response;metabolic process	13490.9	16956.9	20727	9386.29	9181.57	11480.7	16518.4	17131.5	10713.9	17058.3	10016.2	14787.9	1.70307	1.4764	1.15353	0.0704021	0.0862686	0.150923	0.391878
O95249	GOSR1	9527	Golgi SNAP receptor complex member 1 [OS=Homo sapiens]	cell growth;conjugation;metabolic process	29923.1	39945.3	40583.4	32911.2	38482	28047.6	42758.5	38781.6	23765.4	36817.3	33146.9	35101.8	1.11073	1.05898	1.04887	0.835026	0.785424	0.785424	0.785424
Q99933	BAG1	573	BAG family molecular chaperone regulator 1 [OS=Homo sapiens]	development;metabolic process	9030.49	10598.2	11441.2	8311.78	10462	7336.18	9395.61	11101.5	9796.27	10356.6	8703.33	10097.8	1.18996	1.16022	1.02563	0.302813	0.341669	0.341669	0.811441
Q08379	GOLGA2	2801	Golgin subfamily A member 2 [OS=Homo sapiens]	cell differentiation;cell growth;cell organization and biogenesis;cellular homeostasis;conjugation;metabolic process	166826	182481	154684	81302.2	81954.9	79030.1	110323	112569	128028	167997	80762.4	116973	2.08014	1.44836	1.4362	0.000109444	0.000107411	0.00403979	0.00106189
Q8N1S5	SLC39A11	201266	Zinc transporter ZIP11 [OS=Homo sapiens]	conjugation	34198.3	28921.4	22906	6168.33	5997	37586.6	23133.3	3803.49	27035	28675.2	16584	17990.6	1.72909	1.08482	1.5939	0.50778	0.536344	0.899933	0.536344
Q9UBR2	CTSZ	1522	Cathepsin Z [OS=Homo sapiens]	cell organization and biogenesis;cellular homeostasis;defense response;metabolic process	585729	659975	560582	238218	98675.6	16107.6	490044	482844	522681	602095	117667	498523	5.11694	4.23672	1.20776	0.000414231	0.00053398	0.000992649	0.130316
P09132	SRP19	6728	Signal recognition particle 19 kDa protein [OS=Homo sapiens]	cell growth;conjugation	86090.1	96061.4	92914.6	31042.1	65880.8	55109.4	59766.2	48048.6	37980.4	91688.7	50677.4	48598.4	1.80926	-1.04278	1.88666	0.00889747	0.0101694	0.844382	0.0101694
O95989	NUDT3	11165	Diphosphoinositol polyphosphate phosphohydrolase 1 [OS=Homo sapiens]	cell death;cellular component movement;cellular homeostasis	14918.6	25207.2	19502.8	25326.4	34796.7	16176.1	19943.6	13877.3	19779.5	19876.2	25433.1	17866.8	-1.27957	-1.42348	1.11247	0.390553	0.499021	0.499021	0.716365
Q13033	STRN3	29966	Striatin-3 [OS=Homo sapiens]	metabolic process	49968.8	49441	47053.3	36442.7	28090.8	28338.3	39472.8	46075.8	32400.4	48821	30957.2	39316.3	1.57705	1.27002	1.24175	0.0122377	0.0126694	0.0812433	0.0812433
Q8IUR0	TRAPPC5	126003	Trafficking protein particle complex subunit 5 [OS=Homo sapiens]	conjugation	18638.1	15412.6	19617.8	9820.32	11825.1	16459.2	22615.4	22488.2	9628.7	17889.5	12701.5	18244.1	1.40845	1.43637	-1.01982	0.364033	0.363883	0.363883	0.932298
Q9P2W9	STX18	53407	Syntaxin-18 [OS=Homo sapiens]	cell growth;conjugation;metabolic process	20032.7	26930	28057.2	19143.4	16049.9	11832.5	25241.5	27647.3	20988.9	25006.7	15675.3	24625.9	1.59529	1.571	1.01546	0.0404041	0.0425306	0.0425306	0.906746
P49593	PPM1F	9647	Protein phosphatase 1F [OS=Homo sapiens]	cell organization and biogenesis;cellular homeostasis;development;metabolic process	4731.8	7795.75	14198.5	11329	15737.7	7989.18	14777.3	14786.3	19089.3	8908.69	11685.3	16217.6	-1.31167	1.38787	-1.82043	0.142367	0.411847	0.300192	0.178099
O43318	MAP3K7	6885	Mitogen-activated protein kinase kinase kinase 7 [OS=Homo sapiens]	cell organization and biogenesis;cellular homeostasis;coagulation;development;metabolic process	11532.3	9830.57	7741.76	7201.14	7262.93	7513.17	9964.98	13228.8	9281.03	9701.56	7325.74	10824.9	1.32431	1.47766	-1.11579	0.0959056	0.189971	0.120213	0.434029
Q969M3	YIPF5	81555	Protein YIPF5 [OS=Homo sapiens]	conjugation;metabolic process	64380.8	49688.9	52259.1	52888.1	35645.5	44217	45068.9	38584.1	39283.4	55442.9	44250.2	40978.8	1.25294	-1.07983	1.35297	0.0989854	0.149001	0.589779	0.136348
A2RRP1	NBAS	51594	Neuroblastoma-amplified sequence [OS=Homo sapiens]	cellular component movement;cellular homeostasis;conjugation;metabolic process	5537.3	15002.1	7210.35	7946.53	5882.62	18125.6	10871.3	6047.22	4718.57	9249.91	10651.6	7212.36	-1.15153	-1.47685	1.28251	0.724059	0.749301	0.749301	0.749301
O15091	PRORP	9692	Mitochondrial ribonuclease P catalytic subunit [OS=Homo sapiens]	cellular component movement;cellular homeostasis	17996.8	16171.7	12010.6	10324.4	9552.53	8826.13	13778.4	12679.4	11342.7	15393	9567.68	12600.2	1.60886	1.31695	1.22165	0.0299081	0.0321214	0.13071	0.13071
P23142	FBLN1	2192	Fibulin-1 [OS=Homo sapiens]	cell growth;cell organization and biogenesis;cellular homeostasis;coagulation;defense response;metabolic process	56618.6	19156.5	19129.9	1.03223e+06	2.09153e+06	1.27526e+06	132066	61411.8	182725	31635	1.46634e+06	125401	-46.3518	-11.6932	-3.96399	0.00268757	0.00335902	0.00335902	0.733989
O60678	PRMT3	10196	Protein arginine N-methyltransferase 3 [OS=Homo sapiens]	cell organization and biogenesis;cellular homeostasis;metabolic process	75278.6	61754	62691.1	35872.1	42443.3	39279.6	71440.1	65215.5	74424.7	66574.6	39198.3	70360.1	1.6984	1.79498	-1.05686	0.000828578	0.00129884	0.00129884	0.429555
Q5JRA6	MIA3	375056	Transport and Golgi organization protein 1 homolog [OS=Homo sapiens]	cell growth;coagulation;conjugation;defense response;metabolic process	8538.89	7447.19	9010.67	5257.04	4046.89	6297.98	7662.86	6710.04	5977.4	8332.25	5200.64	6783.43	1.60216	1.30435	1.22832	0.0182187	0.0190939	0.0890011	0.0890011
Q15369	ELOC	6921	Elongin-C [OS=Homo sapiens]	cell organization and biogenesis;cellular homeostasis;metabolic process	426017	634047	460708	703092	784318	605418	701698	611469	601300	506924	697610	638156	-1.37616	-1.09317	-1.25888	0.0919798	0.115814	0.442119	0.178915
P98170	XIAP	331	E3 ubiquitin-protein ligase XIAP [OS=Homo sapiens]	cell death;cell organization and biogenesis;cellular homeostasis;coagulation;development;metabolic process	7286.34	13363.2	6673.36	5956.41	8862.49	5390.94	12352.2	9953.36	10602.2	9107.64	6736.61	10969.3	1.35196	1.62831	-1.2044	0.19565	0.396167	0.249189	0.396167
Q96ST2	IWS1	55677	Protein IWS1 homolog [OS=Homo sapiens]	cellular component movement;cellular homeostasis;conjugation;metabolic process	14209.3	20703	14476.1	9792.24	7534.21	8611.6	11842.5	8192.63	9958.07	16462.8	8646.02	9997.72	1.90409	1.15634	1.64666	0.0169688	0.0240471	0.525527	0.0271115
Q86Y56	DNAAF5	54919	Dynein axonemal assembly factor 5 [OS=Homo sapiens]	cell growth;metabolic process	69013.1	55120.8	61864.9	51188.4	47831.1	43563.1	76931.4	68355.5	67723.5	61999.6	47527.5	71003.5	1.3045	1.49394	-1.14523	0.00536812	0.0262555	0.00565374	0.0897823
Q8N6H7	ARFGAP2	84364	ADP-ribosylation factor GTPase-activating protein 2 [OS=Homo sapiens]	cell growth;conjugation	178861	175791	135963	149531	147865	121138	164175	128806	117167	163538	139512	136716	1.17222	-1.02045	1.19619	0.323021	0.338687	0.880362	0.338687
O43678	NDUFA2	4695	NADH dehydrogenase [ubiquinone] 1 alpha subcomplex subunit 2 [OS=Homo sapiens]	cell growth;cellular homeostasis;conjugation;defense response	10378.8	12403.6	15704.6	17499.4	10304.9	25039.4	20809.8	14142.7	11066.6	12829	17614.6	15339.7	-1.37302	-1.1483	-1.1957	0.579948	0.622073	0.622073	0.622073
Q9UBP6	METTL1	4234	tRNA (guanine-N(7)-)-methyltransferase [OS=Homo sapiens]	cellular component movement;cellular homeostasis	86303.9	102953	108892	111297	95456.5	86086.2	125531	135247	107092	99382.9	97613.1	122623	1.01813	1.25622	-1.23385	0.0993031	0.872686	0.105735	0.105735
O15027	SEC16A	9919	Protein transport protein Sec16A [OS=Homo sapiens]	cell growth;cellular homeostasis;coagulation;conjugation;metabolic process	68548.6	54697.9	51405.5	28454.3	19579.1	21490.2	57352	43983.9	35688.3	58217.4	23174.5	45674.7	2.51213	1.9709	1.27461	0.00702544	0.00760894	0.0283	0.125805
P54105	CLNS1A	1207	Methylosome subunit pICln [OS=Homo sapiens]	cell growth;cellular component movement;cellular homeostasis;conjugation	75233.8	215420	233530	60138.4	61931.7	30253.8	97868	102239	74292.8	174728	50774.6	91466.7	3.44124	1.80143	1.91029	0.0649349	0.0787727	0.373125	0.144786
Q01415	GALK2	2585	N-acetylgalactosamine kinase [OS=Homo sapiens]	cellular homeostasis	119669	97231.2	111470	120568	164552	113427	108190	102650	115167	109457	132849	108669	-1.21371	-1.22251	1.00725	0.24153	0.233573	0.233573	0.958179
Q9HCY8	S100A14	57402	Protein S100-A14 [OS=Homo sapiens]	coagulation;development;metabolic process	31552.8	35442.1	34805.7	159810	99738.6	153123	51196.3	42195.7	43214.2	33933.5	137557	45535.4	-4.05372	-3.02088	-1.3419	0.00109831	0.00164792	0.00164792	0.488434
P42356	PI4KA	5297	Phosphatidylinositol 4-kinase alpha [OS=Homo sapiens]	cell growth;cellular homeostasis;development;metabolic process	22966.3	23886.7	25584.8	10005.2	5246.49	4918.04	20222.7	23716.2	18303	24145.9	6723.26	20747.3	3.5914	3.0859	1.16381	0.000258188	0.000345027	0.000574128	0.134677
O43464	HTRA2	27429	Serine protease HTRA2, mitochondrial [OS=Homo sapiens]	cell growth;cell organization and biogenesis;cellular homeostasis;coagulation;defense response;development;metabolic process	38292.9	43390.7	45296.3	25180.4	15674.9	16455.5	25682.6	32731	24017.3	42326.6	19103.6	27477	2.21564	1.43831	1.54044	0.00222941	0.00235589	0.0654943	0.0108108
P51649	ALDH5A1	7915	Succinate-semialdehyde dehydrogenase, mitochondrial [OS=Homo sapiens]	cellular homeostasis;defense response	103408	95377	90560.3	58298.5	73713.2	48546.5	65680.3	65170.4	65106.3	96448.5	60186.1	65319	1.60251	1.08528	1.47658	0.00334909	0.00501134	0.473953	0.00535501
Q9P2M7	CGN	57530	Cingulin [OS=Homo sapiens]		52904.6	91436.7	65081.4	27924.6	16598.5	32463.1	56646.3	34880.4	36282.5	69807.6	25662.1	42603	2.72026	1.66016	1.63856	0.0239917	0.0264885	0.193698	0.0855955
O15084	ANKRD28	23243	Serine/threonine-protein phosphatase 6 regulatory ankyrin repeat subunit A [OS=Homo sapiens]		29773.6	28326.3	37761.3	9360.69	6758.25	8067.69	14234.1	25349	25504	31953.7	8062.21	21695.7	3.9634	2.69103	1.47282	0.00265603	0.00267761	0.0198404	0.0398811
P08236	GUSB	2990	Beta-glucuronidase [OS=Homo sapiens]	cellular homeostasis	36371.4	53880.9	35884.6	36315.7	46775.1	38184.5	37226.2	32424.8	25258.3	42045.6	40425.1	31636.4	1.04009	-1.2778	1.32903	0.270865	0.802276	0.308345	0.308345
Q8N392	ARHGAP18	93663	Rho GTPase-activating protein 18 [OS=Homo sapiens]	cell growth;development;metabolic process	79912.8	72944.3	89132.5	65395.9	77874.7	57666.3	101947	117533	110147	80663.2	66978.9	109875	1.20431	1.64045	-1.36215	0.00263131	0.104535	0.00291635	0.00975464
Q12846	STX4	6810	Syntaxin-4 [OS=Homo sapiens]	cell death;cell growth;coagulation;conjugation;metabolic process	32488	30652.7	26793.7	51115.8	52770	38807.1	30069.2	32978.8	30039.4	29978.2	47564.3	31029.2	-1.58663	-1.53289	-1.03506	0.00711204	0.00845799	0.00845799	0.79809
Q99990	VGLL1	51442	Transcription cofactor vestigial-like protein 1 [OS=Homo sapiens]	metabolic process	322135	314009	273495	29009.6	20967.5	35776.1	161324	131557	163525	303213	28584.4	152136	10.6076	5.32233	1.99304	6.03823e-06	5.75645e-06	0.000192779	9.31849e-05
Q9NV70	EXOC1	55763	Exocyst complex component 1 [OS=Homo sapiens]	coagulation;conjugation;development;metabolic process	30141.6	25497.7	30585.1	29824.3	21891.5	23503.9	25288	21574.2	25222.4	28741.4	25073.2	24028.2	1.1463	-1.04349	1.19615	0.238759	0.308214	0.699885	0.308214
P48449	LSS	4047	Lanosterol synthase [OS=Homo sapiens]	cellular homeostasis;metabolic process	67324.3	125011	71832.4	111366	124789	57344	28525.8	55147.1	54654.8	88056.1	97832.9	46109.2	-1.11103	-2.12176	1.90973	0.147352	0.694757	0.191473	0.191473
Q96RL7	VPS13A	23230	Vacuolar protein sorting-associated protein 13A [OS=Homo sapiens]	cell growth;cell organization and biogenesis;cellular homeostasis;conjugation;defense response;metabolic process	53278.3	72087.3	53033	77153.5	110633	59496	70862.7	55361.7	73026.1	59466.2	82427.6	66416.8	-1.38612	-1.24106	-1.11688	0.315477	0.446358	0.446358	0.638143
P35080	PFN2	5217	Profilin-2 [OS=Homo sapiens]	cell growth;metabolic process	126193	108690	105615	171012	176287	170210	188186	174907	190065	113500	172503	184386	-1.51986	1.06888	-1.62455	8.9399e-05	0.000179396	0.126795	0.000126548
Q9UDX3	SEC14L4	284904	SEC14-like protein 4 [OS=Homo sapiens]		34216.2	17189.3	23926.1	4664.17	33064.3	22130.8	22017.7	5121.24	15818.1	25110.5	19953.1	14319	1.25848	-1.39347	1.75365	0.513919	0.580935	0.580935	0.580935
O95487	SEC24B	10427	Protein transport protein Sec24B [OS=Homo sapiens]	cell growth;conjugation;defense response;metabolic process	44812.7	18255.2	112171	7480.23	33695.5	29951.4	21651.6	37060.8	10577	58412.9	23709	23096.4	2.46374	-1.02652	2.52909	0.327711	0.311848	0.980936	0.311848
O95999	BCL10	8915	B-cell lymphoma/leukemia 10 [OS=Homo sapiens]	cell growth;coagulation;defense response;development;metabolic process	10068.3	9888.02	10764.6	8492.52	7509.22	12673.8	13214.3	12520.6	11210.1	10240.3	9558.51	12315	1.07133	1.28838	-1.2026	0.201738	0.64262	0.281708	0.281708
Q9P0K7	RAI14	26064	Ankycorbin [OS=Homo sapiens]	metabolic process	5056.91	11647.2	5644.97	5250.33	2463.88	7543.43	6530.58	6630.87	6676.58	7449.68	5085.88	6612.67	1.46478	1.3002	1.12658	0.553544	0.703525	0.703525	0.703525
O00399	DCTN6	10671	Dynactin subunit 6 [OS=Homo sapiens]	cell differentiation;cell growth	99847.4	93748	90969.9	81148.6	71189.9	82214.6	95666.6	97522.7	102635	94855.1	78184.4	98608.2	1.21322	1.26123	-1.03957	0.00458221	0.00845198	0.00631159	0.380021
P32519	ELF1	1997	ETS-related transcription factor Elf-1 [OS=Homo sapiens]	metabolic process	30868.8	34260.8	35713.2	31547.7	25713.1	34977.9	30360.4	37072	38703	33614.3	30746.3	35378.5	1.09328	1.15066	-1.05248	0.41194	0.607328	0.607328	0.607328
Q9H9P8	L2HGDH	79944	L-2-hydroxyglutarate dehydrogenase, mitochondrial [OS=Homo sapiens]	cell organization and biogenesis;cellular homeostasis	68701.2	64672.3	67785.1	39694.6	45570.3	38963.4	46991.4	54866.6	51142.5	67052.9	41409.5	51000.2	1.61927	1.23161	1.31476	0.000234506	0.00023891	0.0122729	0.0015535
Q6UN15	FIP1L1	81608	Pre-mRNA 3'-end-processing factor FIP1 [OS=Homo sapiens]	cellular component movement;cellular homeostasis	196067	284787	224110	171007	33666.3	144287	173468	156187	182927	234988	116320	170861	2.02018	1.46888	1.37532	0.0720408	0.0821604	0.231163	0.231163
O75431	MTX2	10651	Metaxin-2 [OS=Homo sapiens]	cell growth;conjugation	30076.8	46169	43340	18498.3	8987.06	19627.4	31631.4	30408.6	18516.2	39861.9	15704.2	26852.1	2.53829	1.70986	1.4845	0.0192208	0.0202801	0.11116	0.108288
Q15436	SEC23A	10484	Protein transport protein Sec23A [OS=Homo sapiens]	cell growth;conjugation;metabolic process	16217.6	15614.9	17424.8	15354	6662.39	8927.6	7701.16	11795.2	11148.6	16419.1	10314.7	10215	1.59182	-1.00976	1.60736	0.0675184	0.0662526	0.968278	0.0662526
P57740	NUP107	57122	Nuclear pore complex protein Nup107 [OS=Homo sapiens]	cell growth;cellular homeostasis;conjugation;defense response;metabolic process	353484	457306	369370	356068	251818	334684	554158	482972	425084	393387	314190	487405	1.25207	1.55131	-1.239	0.0310452	0.149574	0.0335442	0.146248
Q9Y3C4	TPRKB	51002	EKC/KEOPS complex subunit TPRKB [OS=Homo sapiens]	cell growth;cell proliferation;cellular component movement;cellular homeostasis	35073.5	29887.8	33390.5	30431.7	38334.1	42211.2	42337.5	41936.2	32749	32783.9	36992.3	39007.6	-1.12837	1.05448	-1.18984	0.351077	0.502015	0.633404	0.502015
Q9Y237	PIN4	5303	Peptidyl-prolyl cis-trans isomerase NIMA-interacting 4 [OS=Homo sapiens]	cell organization and biogenesis;cellular component movement;cellular homeostasis	140306	93509.4	105123	26475.6	108234	100847	119127	169755	130670	112980	78518.8	139850	1.43888	1.78111	-1.23784	0.158383	0.362254	0.19625	0.362254
Q9Y2Q9	MRPS28	28957	28S ribosomal protein S28, mitochondrial [OS=Homo sapiens]	cell organization and biogenesis;cellular homeostasis	11403.8	18399.5	32793.5	11311.3	9749.15	28365.3	32272.9	28730.7	9721.09	20865.6	16475.3	23574.9	1.26648	1.43093	-1.12985	0.744517	0.775959	0.775959	0.775959
Q15477	SKIV2L	6499	Helicase SKI2W [OS=Homo sapiens]	cellular component movement;cellular homeostasis	47079.3	41144.1	49388.7	45466.4	44266.5	33767.4	47304.3	40253.8	34962	45870.7	41166.8	40840	1.11427	-1.008	1.12318	0.520794	0.528046	0.946419	0.528046
Q92504	SLC39A7	7922	Zinc transporter SLC39A7 [OS=Homo sapiens]	conjugation;metabolic process	17958.9	19410.5	18424.8	7223.32	13793.1	10553.4	17993.9	20936.3	9647.94	18598	10523.3	16192.7	1.76733	1.53876	1.14854	0.103472	0.133	0.187958	0.478628
P19525	EIF2AK2	5610	Interferon-induced, double-stranded RNA-activated protein kinase [OS=Homo sapiens]	cell organization and biogenesis;cellular homeostasis;coagulation;development;metabolic process	170996	195757	208520	67783.7	59752.5	72020.4	150879	79515.7	147836	191758	66518.9	126077	2.88276	1.89535	1.52096	0.00318546	0.00317396	0.0310259	0.0310259
Q8N8S7	ENAH	55740	Protein enabled homolog [OS=Homo sapiens]	cell growth;defense response;metabolic process	517961	647051	569723	515290	541690	434057	480222	439483	484778	578245	497013	468161	1.16344	-1.06163	1.23514	0.0909697	0.153215	0.519075	0.11994
Q5VT79	ANXA8L1	728113	Annexin A8-like protein 1 [OS=Homo sapiens]	cell growth;conjugation;metabolic process	47320.5	67602.5	35835.8	60888.2	126571	46418.4	28833.5	25144.6	18804.5	50253	77959.2	24260.9	-1.55134	-3.21337	2.07136	0.1203	0.275154	0.143346	0.275154
Q9UJY5	GGA1	26088	ADP-ribosylation factor-binding protein GGA1 [OS=Homo sapiens]	conjugation;metabolic process	25988.7	36801.7	36803.9	30162.3	32280.4	18180.1	31455.8	33585.5	31853.9	33198.1	26874.3	32298.4	1.23531	1.20183	1.02786	0.399311	0.434129	0.434129	0.853536
Q9H6R3	ACSS3	79611	Acyl-CoA synthetase short-chain family member 3, mitochondrial [OS=Homo sapiens]	cellular homeostasis	38328.2	45692.6	26252.1	23201.3	36392.9	22615.7	18484.6	12302.8	20591.7	36757.7	27403.3	17126.4	1.34136	-1.60007	2.14626	0.053898	0.184905	0.184905	0.0599953
Q9UI10	EIF2B4	8890	Translation initiation factor eIF-2B subunit delta [OS=Homo sapiens]	cell organization and biogenesis;cellular homeostasis;coagulation;defense response;development;metabolic process	81280.3	82202	83887.5	60927.3	49763.3	55274.5	79113.2	78192.9	83671.3	82456.6	55321.7	80325.8	1.49049	1.45198	1.02653	0.000188113	0.000260303	0.000260303	0.509257
P08134	RHOC	389	Rho-related GTP-binding protein RhoC [OS=Homo sapiens]	cell differentiation;cell growth;coagulation;development;metabolic process	20568.6	17593.6	17235	19873.3	27809	10627.3	12383.9	14582.3	16729.8	18465.7	19436.5	14565.4	-1.05257	-1.33443	1.26779	0.520519	0.827673	0.594219	0.594219
Q96GT9	XAGE2	9502	X antigen family member 2 [OS=Homo sapiens]		19711.4	31756.6	37837.1	44277.9	75346.4	87256.8	52833	26724.3	49469.8	29768.4	68960.4	43009	-2.31656	-1.60339	-1.44479	0.0617295	0.074066	0.144094	0.353153
Q5HYI8	RABL3	285282	Rab-like protein 3 [OS=Homo sapiens]	conjugation;defense response;metabolic process	83211.6	73581.3	78164.1	60417.3	54241.3	53822.7	76961.1	79103.5	5517.61	78319	56160.5	53860.8	1.39456	-1.0427	1.4541	0.449343	0.463777	0.911984	0.463777
Q9BST9	RTKN	6242	Rhotekin [OS=Homo sapiens]	cell differentiation;cell growth;development;metabolic process	18746.1	18315.3	16159.5	6317.3	8944.15	5966.62	13734.2	13654.9	11630.7	17740.3	7076.03	13006.6	2.5071	1.83812	1.36395	0.000279242	0.000271669	0.00320304	0.00633652
Q9NRR5	UBQLN4	56893	Ubiquilin-4 [OS=Homo sapiens]	cell organization and biogenesis;cell proliferation;cellular homeostasis;coagulation;metabolic process	30188.2	14237.5	15889.4	11327	11582.2	13006.9	26695	13201.3	11037.7	20105	11972	16978	1.67933	1.41814	1.18418	0.418228	0.607289	0.607289	0.607289
O94906	PRPF6	24148	Pre-mRNA-processing factor 6 [OS=Homo sapiens]	cell growth;cellular component movement;cellular homeostasis;metabolic process	326741	537675	432954	349868	87286.4	288884	403891	409915	379831	432457	242013	397879	1.78692	1.64404	1.08691	0.121251	0.159104	0.159104	0.687965
Q9Y679	AUP1	550	Lipid droplet-regulating VLDL assembly factor AUP1 [OS=Homo sapiens]	cell growth;cell organization and biogenesis;cellular homeostasis;coagulation;conjugation;metabolic process	19811	24330.2	20233.8	17463.1	15808.9	13768.9	11838.3	16053.5	17179.1	21458.3	15680.3	15023.7	1.36849	-1.04371	1.4283	0.0323221	0.039778	0.751039	0.039778
A6NDB9	PALM3	342979	Paralemmin-3 [OS=Homo sapiens]	development;metabolic process	16297.6	49379.9	19255.8	17877.3	17447.8	11579.7	15902.2	12108.2	15163.3	28311.1	15634.9	14391.2	1.81076	-1.08642	1.96725	0.292566	0.302263	0.892701	0.302263
Q9UPY3	DICER1	23405	Endoribonuclease Dicer [OS=Homo sapiens]	cell growth;cell proliferation;cellular component movement;cellular homeostasis;defense response;development;metabolic process	48024.8	53105.6	24383	28822	15802.7	44973.8	29967.2	29154.8	41057.5	41837.8	29866.2	33393.2	1.40084	1.11809	1.25289	0.536832	0.675681	0.747553	0.675681
Q96T60	PNKP	11284	Bifunctional polynucleotide phosphatase/kinase [OS=Homo sapiens]	cell proliferation;cellular homeostasis;coagulation;metabolic process	103916	95264	96680.9	73625.8	25744.3	67612.1	105597	104558	86201.6	98620.2	55660.7	98785.4	1.77181	1.77478	-1.00168	0.0289439	0.0285859	0.0285859	0.990634
Q9UHB6	LIMA1	51474	LIM domain and actin-binding protein 1 [OS=Homo sapiens]	cell growth;cellular homeostasis;conjugation;metabolic process	631725	1.47443e+06	1.15234e+06	1.37995e+06	154263	1.402e+06	1.05565e+06	1.07209e+06	1.14878e+06	1.08617e+06	978739	1.09217e+06	1.10976	1.1159	-1.00553	0.948921	0.988285	0.988285	0.988285
Q8N0U8	VKORC1L1	154807	Vitamin K epoxide reductase complex subunit 1-like protein 1 [OS=Homo sapiens]	cell organization and biogenesis;cellular homeostasis;coagulation	43920	41755.7	38139.3	43098.7	39306	46455.9	38861.5	34168	38391.7	41271.6	42953.5	37140.4	-1.04075	-1.15652	1.11123	0.133125	0.525318	0.175895	0.223215
Q9BRF8	CPPED1	55313	Serine/threonine-protein phosphatase CPPED1 [OS=Homo sapiens]	cell organization and biogenesis;cellular homeostasis	80070.3	76788.5	74648.6	76320.3	106890	64756.5	96601.6	96296.4	109468	77169.1	82655.8	100789	-1.0711	1.21938	-1.30607	0.157378	0.633661	0.222426	0.222119
Q13685	AAMP	14	Angio-associated migratory cell protein [OS=Homo sapiens]	defense response;metabolic process	103320	80992.7	83697.4	7796.15	6026.1	6165.58	123075	131121	115827	89336.5	6662.61	123341	13.4086	18.5124	-1.38063	6.73938e-06	2.81989e-05	7.51445e-06	0.00244771
P61966	AP1S1	1174	AP-1 complex subunit sigma-1A [OS=Homo sapiens]	conjugation;metabolic process	37942.5	46386.8	50920.5	37881.3	45630	43523.4	41285.3	35257.2	32633.5	45083.3	42344.9	36392	1.06467	-1.16358	1.23882	0.186985	0.537903	0.308233	0.250676
Q9H900	ZWILCH	55055	Protein zwilch homolog [OS=Homo sapiens]	cell differentiation;development;metabolic process	22992.2	22320.6	20390.4	10183.6	12168.1	9690.54	23707.5	24245.2	17017.3	21901.1	10680.8	21656.7	2.05051	2.02763	1.01129	0.00263966	0.00291326	0.00291326	0.910957
Q13444	ADAM15	8751	Disintegrin and metalloproteinase domain-containing protein 15 [OS=Homo sapiens]	cell communication;cell growth;cell organization and biogenesis;cellular homeostasis;coagulation;defense response;development;metabolic process	12497.2	12056	10795.7	10543.5	9586.76	11358.1	9209.46	12039.1	9323.94	11783	10496.1	10190.8	1.1226	-1.02996	1.15623	0.285588	0.341722	0.760821	0.341722
Q8N264	ARHGAP24	83478	Rho GTPase-activating protein 24 [OS=Homo sapiens]	coagulation;defense response;development;metabolic process	25742.8	31787.7	26156.6	13390.3	10954.7	12108.5	17495.6	20695.9	18764.1	27895.7	12151.2	18985.2	2.29572	1.56242	1.46934	0.000447294	0.000438992	0.0102812	0.00448535
Q9BXB5	OSBPL10	114884	Oxysterol-binding protein-related protein 10 [OS=Homo sapiens]	cellular homeostasis;conjugation	93931.4	117587	92835.7	91154	68237.1	80818.7	80983.5	102671	60263.6	101451	80069.9	81306.1	1.26704	1.01544	1.24777	0.265264	0.264202	0.928112	0.264202
Q9BTW9	TBCD	6904	Tubulin-specific chaperone D [OS=Homo sapiens]	cell differentiation;cell growth;defense response;metabolic process	68071.6	68249.4	67100.9	31176.7	39727.6	21654.2	59968.8	61337.7	57392.6	67807.3	30852.8	59566.4	2.19777	1.93066	1.13835	0.000356178	0.000451008	0.000899223	0.108609
Q96QF0	RAB3IP	117177	Rab-3A-interacting protein [OS=Homo sapiens]	cell growth;conjugation;metabolic process	11832.4	13909.7	5788.13	7507.91	7101.51	3658.39	11645.3	9702.47	11663.3	10510.1	6089.27	11003.7	1.726	1.80707	-1.04697	0.138431	0.152197	0.152197	0.836289
P54725	RAD23A	5886	UV excision repair protein RAD23 homolog A [OS=Homo sapiens]	cell organization and biogenesis;cell proliferation;cellular homeostasis;coagulation;metabolic process	60242.5	55841.4	38905.1	45644.7	55195.9	39217.1	53612.5	47624.8	41934.5	51663	46685.9	47723.9	1.10661	1.02223	1.08254	0.768674	0.888262	0.888262	0.888262
P19013	KRT4	3851	Keratin, type II cytoskeletal 4 [OS=Homo sapiens]	cell growth;metabolic process	58390.6	66737.4	58208.3	55186.9	60073.5	39397.6	60936.4	64103.4	62451.3	61112.1	51552.7	62497.1	1.18543	1.2123	-1.02266	0.188237	0.211338	0.211338	0.814135
P57735	RAB25	57111	Ras-related protein Rab-25 [OS=Homo sapiens]	cell growth;conjugation;metabolic process	114926	96354	99552	201394	203120	196951	97506.7	97414.9	83775.7	103611	200489	92899.1	-1.93502	-2.15813	1.1153	4.08174e-06	6.32553e-06	6.32553e-06	0.133077
Q9NPL8	TIMMDC1	51300	Complex I assembly factor TIMMDC1, mitochondrial [OS=Homo sapiens]		36255.8	64564.8	49018	16265.1	11933.1	16994.6	30246.9	32112	24321.7	49946.2	15064.2	28893.5	3.31555	1.91802	1.72863	0.00747994	0.00786892	0.098288	0.0370935
P05187	ALPP	250	Alkaline phosphatase, placental type [OS=Homo sapiens]	cellular homeostasis	34331.6	64981.6	38892.6	220555	46031	167482	80576.8	70768.4	101326	46068.6	144689	84223.6	-3.14074	-1.71792	-1.82822	0.152764	0.191966	0.321064	0.41431
O14972	VPS26C	10311	Vacuolar protein sorting-associated protein 26C [OS=Homo sapiens]	conjugation	43969.9	47948.1	39552.2	20301.1	19633.7	21709.4	42795.5	41141.7	44105	43823.4	20548.1	42680.8	2.13272	2.07712	1.02677	5.93831e-05	7.53073e-05	7.53073e-05	0.61556
Q14118	DAG1	1605	Dystroglycan [OS=Homo sapiens]	cell communication;cell death;cell growth;cell organization and biogenesis;coagulation;defense response;metabolic process	9737.99	56285.6	8847.74	505345	550561	422085	207033	162651	189246	24957.1	492664	186310	-19.7404	-2.64433	-7.46519	3.08505e-05	3.20886e-05	0.000181854	0.00360497
Q69YN2	CWF19L1	55280	CWF19-like protein 1 [OS=Homo sapiens]	cellular component movement;cellular homeostasis	39683.5	41440.1	39035.5	23857	24034.3	24072.9	32244.4	43396.2	37116.9	40053	23988.1	37585.8	1.66971	1.56686	1.06564	0.00207355	0.00302627	0.00355179	0.39615
Q9H074	PAIP1	10605	Polyadenylate-binding protein-interacting protein 1 [OS=Homo sapiens]	cell organization and biogenesis;cellular homeostasis;metabolic process	241164	235245	206750	223094	241794	195350	261324	241648	250714	227720	220079	251229	1.03472	1.14154	-1.10324	0.169917	0.623448	0.23844	0.243833
Q9Y3D9	MRPS23	51649	28S ribosomal protein S23, mitochondrial [OS=Homo sapiens]	cell organization and biogenesis;cellular homeostasis	103051	131468	145928	84497	79869.1	109505	114599	111444	83593.3	126815	91290.4	103212	1.38914	1.13059	1.22869	0.13275	0.169257	0.458846	0.252288
Q13573	SNW1	22938	SNW domain-containing protein 1 [OS=Homo sapiens]	cell differentiation;cellular component movement;cellular homeostasis;coagulation;defense response;development;metabolic process	234374	241524	269694	255421	105762	244296	272811	325353	270158	248531	201826	289441	1.23141	1.43411	-1.16461	0.204556	0.376779	0.260966	0.376779
O00186	STXBP3	6814	Syntaxin-binding protein 3 [OS=Homo sapiens]	cell communication;cell death;coagulation;conjugation;defense response;metabolic process	54741.2	45130.2	49919	64562.2	55791	56978.3	52476	51131.4	46735.2	49930.1	59110.5	50114.2	-1.18386	-1.17952	-1.00369	0.0633086	0.0627275	0.0627275	0.959627
Q9P013	CWC15	51503	Spliceosome-associated protein CWC15 homolog [OS=Homo sapiens]	cellular component movement;cellular homeostasis	73045.8	137408	75109.5	96675.3	87277.4	80307.4	98437.9	83213.7	97101.7	95187.9	88086.7	92917.8	1.08062	1.05484	1.02443	0.923928	0.904363	0.904363	0.904363
O95674	CDS2	8760	Phosphatidate cytidylyltransferase 2 [OS=Homo sapiens]	cell growth;cellular homeostasis	14079.7	11740.6	11822.7	16225.1	55752	11826.6	10643.9	9395.83	9078.02	12547.6	27934.6	9705.93	-2.22628	-2.87809	1.29278	0.301667	0.340173	0.340173	0.811906
O75845	SC5D	6309	Lathosterol oxidase [OS=Homo sapiens]	cellular homeostasis	20198.3	16568.5	16400	23369.2	23051.6	20258.4	16287.3	18889	14032.2	17722.3	22226.4	16402.8	-1.25415	-1.35504	1.08044	0.0341975	0.0605008	0.0451575	0.474154
P41240	CSK	1445	Tyrosine-protein kinase CSK [OS=Homo sapiens]	cell growth;cell organization and biogenesis;cellular homeostasis;defense response;development;metabolic process	55850.5	47840.6	42749.6	39212	38540.9	42741.4	52530.7	59442.9	61338.6	48813.6	40164.8	57770.7	1.21533	1.43834	-1.1835	0.0124736	0.0711023	0.0128833	0.0711023
Q9Y316	MEMO1	51072	Protein MEMO1 [OS=Homo sapiens]	metabolic process	52149.4	53157.1	48274.1	66133	74609.9	58073	84954	52822.8	84306.3	51193.5	66272	74027.7	-1.29454	1.11703	-1.44604	0.128668	0.249438	0.448763	0.163114
Q9Y3L5	RAP2C	57826	Ras-related protein Rap-2c [OS=Homo sapiens]	development;metabolic process	135936	112524	120376	78911.1	50315.9	46122.5	77935.9	90613.9	54224.2	122945	58449.8	74258	2.10344	1.27046	1.65565	0.00699341	0.00870923	0.281023	0.0160983
P31942	HNRNPH3	3189	Heterogeneous nuclear ribonucleoprotein H3 [OS=Homo sapiens]	cellular component movement;cellular homeostasis;metabolic process	1.05368e+06	1.42499e+06	1.17935e+06	1.31498e+06	149187	1.12872e+06	1.29857e+06	1.25471e+06	1.30746e+06	1.21934e+06	864295	1.28691e+06	1.41079	1.48898	-1.05542	0.396942	0.440665	0.440665	0.833956
Q9C0K1	SLC39A8	64116	Metal cation symporter ZIP8 [OS=Homo sapiens]	cell communication;cell growth;cell organization and biogenesis;cellular component movement;cellular homeostasis;conjugation;metabolic process	81899.5	89491.3	99544	11288.3	17365.9	6953.65	37487	37745.3	34108	90311.6	11869.3	36446.8	7.60884	3.07068	2.4779	1.09902e-05	1.18749e-05	0.00251357	5.29331e-05
Q9NZZ3	CHMP5	51510	Charged multivesicular body protein 5 [OS=Homo sapiens]	cell differentiation;cell growth;conjugation;metabolic process	14250.6	30852.9	23166.4	17926.2	33406.2	28690.8	21893.8	22195	23749.3	22756.6	26674.4	22612.7	-1.17216	-1.17962	1.00637	0.712136	0.747317	0.747317	0.979735
Q9H9A5	CNOT10	25904	CCR4-NOT transcription complex subunit 10 [OS=Homo sapiens]	cellular component movement;cellular homeostasis;metabolic process	24573.5	29557.3	29250.4	17431.9	8045.36	18594.7	25139.7	21937.9	22288	27793.7	14690.6	23121.9	1.89194	1.57392	1.20205	0.0158191	0.0175547	0.0543782	0.187248
P51153	RAB13	5872	Ras-related protein Rab-13 [OS=Homo sapiens]	cell growth;conjugation;defense response;development;metabolic process	106029	105024	94756.6	75381.5	94342.2	58692.1	107132	116028	95510	101936	76138.6	106223	1.33883	1.39513	-1.04205	0.0499023	0.065813	0.065813	0.68728
O75531	BANF1	8815	Barrier-to-autointegration factor [OS=Homo sapiens]	cell growth;metabolic process	23290.7	31468.7	25358.3	59011.2	50712	81454.3	67985.4	51014.4	36496.5	26705.9	63725.8	51832.1	-2.38621	-1.22947	-1.94085	0.0347934	0.0411121	0.31067	0.0869198
Q8IWB7	WDFY1	57590	WD repeat and FYVE domain-containing protein 1 [OS=Homo sapiens]	metabolic process	27915.5	41746.4	25069.9	33246.9	38437.7	7904.63	25886.8	6230.7	18843.9	31577.3	26529.8	16987.1	1.19026	-1.56176	1.85889	0.389266	0.630113	0.561964	0.561964
Q8IYI6	EXOC8	149371	Exocyst complex component 8 [OS=Homo sapiens]	cell growth;conjugation;metabolic process	10125.8	13227.3	7599.35	12166.8	12582.7	5657.33	6702.13	12154.6	5605.09	10317.5	10135.6	8153.94	1.01794	-1.24303	1.26534	0.707469	0.950359	0.758968	0.758968
Q9NYK5	MRPL39	54148	39S ribosomal protein L39, mitochondrial [OS=Homo sapiens]		204039	165791	195729	117523	95797	106533	132118	162069	155175	188520	106618	149787	1.76818	1.4049	1.25858	0.00232298	0.00230139	0.0245241	0.0251732
P41236	PPP1R2	5504	Protein phosphatase inhibitor 2 [OS=Homo sapiens]	cellular homeostasis;metabolic process	36075.7	61761.7	21765.5	64297.8	106940	29225.6	63417.3	33486	77747.6	39867.6	66821.2	58216.9	-1.67608	-1.1478	-1.46025	0.532855	0.690421	0.724192	0.690421
Q9NRG7	SDR39U1	56948	Epimerase family protein SDR39U1 [OS=Homo sapiens]		34602.4	30511.5	30334.5	23156.3	29945.7	20312.5	32944.7	36361.3	24570.4	31816.1	24471.5	31292.1	1.30013	1.27872	1.01675	0.18649	0.191771	0.191771	0.896521
O14896	IRF6	3664	Interferon regulatory factor 6 [OS=Homo sapiens]	cell differentiation;defense response;metabolic process	10959.3	14626.3	11397.6	1312.07	5516.58	4442.9	10157.7	10510.5	4886.01	12327.7	3757.18	8518.07	3.28111	2.26714	1.44725	0.0161411	0.0169925	0.0873637	0.110916
O15523	DDX3Y	8653	ATP-dependent RNA helicase DDX3Y [OS=Homo sapiens]	metabolic process	39671.9	50523.8	53609.7	34343.7	7183.49	36442.5	42788.3	38781.9	39697.8	47935.1	25989.9	40422.7	1.84437	1.55532	1.18585	0.100554	0.124497	0.210066	0.410291
P41214	EIF2D	1939	Eukaryotic translation initiation factor 2D [OS=Homo sapiens]	cell growth;cell organization and biogenesis;cellular homeostasis;conjugation;metabolic process	20062.8	23543	23937.6	14247.3	10669.5	18093.7	18758	19946.8	23036.8	22514.5	14336.8	20580.5	1.57039	1.4355	1.09397	0.026341	0.0340708	0.0499923	0.427149
Q2TAL8	QRICH1	54870	Transcriptional regulator QRICH1 [OS=Homo sapiens]	coagulation;development;metabolic process	95555.3	87773	83296.2	55688.1	53638.4	49797	85722.5	91174	90039.5	88874.8	53041.2	88978.7	1.67558	1.67754	-1.00117	7.12593e-05	7.82354e-05	7.82354e-05	0.977411
Q9BQL6	FERMT1	55612	Fermitin family homolog 1 [OS=Homo sapiens]	cell communication;cell differentiation;cell growth;development;metabolic process	87352	77641.9	72514.9	56581.4	63613.5	59809	60141.2	72811.5	59848.5	79169.6	60001.3	64267.1	1.31947	1.07109	1.23188	0.0243235	0.0320322	0.447382	0.0443807
Q5VW36	FOCAD	54914	Focadhesin [OS=Homo sapiens]		8406.34	6406	8177.98	6586.17	6645.89	7291.32	7784.7	12337.2	6796.74	7663.44	6841.12	8972.89	1.1202	1.31161	-1.17087	0.412052	0.60263	0.60263	0.60263
Q9BRJ2	MRPL45	0	39S ribosomal protein L45, mitochondrial [OS=Homo sapiens]		85103.8	80525.9	82275.1	18705.8	17204	27785	24769.1	55478.7	48086.1	82634.9	21231.6	42778	3.89207	2.01483	1.93172	0.000778714	0.000820123	0.037469	0.00397494
P09417	QDPR	5860	Dihydropteridine reductase [OS=Homo sapiens]	cellular homeostasis;defense response;metabolic process	99721.6	55173.7	67052	103191	201856	132274	85827.5	97753.7	86853.7	73982.4	145774	90145	-1.97038	-1.6171	-1.21846	0.0768212	0.10461	0.12008	0.563458
P18846	ATF1	466	Cyclic AMP-dependent transcription factor ATF-1 [OS=Homo sapiens]	cell growth;metabolic process	20524.6	25065.2	25596	19852.3	18428.6	15681.9	28672.4	18525.1	30685.8	23728.6	17987.6	25961.1	1.31916	1.44328	-1.09408	0.139714	0.226316	0.186858	0.545789
Q15643	TRIP11	9321	Thyroid receptor-interacting protein 11 [OS=Homo sapiens]	cell growth;cell organization and biogenesis;cellular component movement;cellular homeostasis;conjugation;defense response;metabolic process	34592.1	87037.3	28523.5	23358.2	32410.1	4042.21	36105.9	26134.4	36987.4	50051	19936.9	33075.9	2.51048	1.65903	1.51322	0.277237	0.373791	0.465805	0.465805
O15117	FYB1	2533	FYN-binding protein 1 [OS=Homo sapiens]	development;metabolic process	25742.8	31787.7	26156.6	13390.3	10954.7	12108.5	17495.6	20695.9	18764.1	27895.7	12151.2	18985.2	2.29572	1.56242	1.46934	0.000447294	0.000438992	0.0102812	0.00448535
Q14139	UBE4A	9354	Ubiquitin conjugation factor E4 A [OS=Homo sapiens]	cell organization and biogenesis;cellular homeostasis;coagulation	33018.6	55322.8	45875.4	37012.4	47215.8	26661.3	50237.6	25853.4	47553.1	44738.9	36963.2	41214.7	1.21037	1.11502	1.08551	0.729228	0.724563	0.724563	0.724563
O95777	LSM8	51691	U6 snRNA-associated Sm-like protein LSm8 [OS=Homo sapiens]	cellular component movement;cellular homeostasis	43770.5	70156	88945.8	78572.6	70607.5	130025	95739	71787.6	58673.9	67624.1	93068.2	75400.2	-1.37626	-1.23432	-1.11499	0.491385	0.635801	0.635801	0.718729
Q5T1M5	FKBP15	23307	FK506-binding protein 15 [OS=Homo sapiens]	cell organization and biogenesis;cellular homeostasis;conjugation	144301	149985	152097	67508.8	90266.5	55024.8	118940	107832	111243	148794	70933.4	112672	2.09766	1.58841	1.3206	0.000417538	0.000404894	0.00544602	0.00716024
P60510	PPP4C	5531	Serine/threonine-protein phosphatase 4 catalytic subunit [OS=Homo sapiens]	cell organization and biogenesis;cellular homeostasis;development;metabolic process	30230.7	121850	33224	36961.8	34970.1	31457.9	31391.3	36168.4	33846	61768.2	34463.3	33801.9	1.79229	-1.01957	1.82736	0.476182	0.464247	0.979423	0.464247
Q13619	CUL4A	8451	Cullin-4A [OS=Homo sapiens]	cell differentiation;cell organization and biogenesis;cell proliferation;cellular homeostasis;coagulation;defense response;development;metabolic process	43258.3	33966.4	35506.9	5945.55	19690.8	25076.8	29654.2	40667.4	27651.6	37577.2	16904.4	32657.7	2.22292	1.93191	1.15064	0.0354855	0.0461899	0.0649103	0.455566
Q6NVY1	HIBCH	26275	3-hydroxyisobutyryl-CoA hydrolase, mitochondrial [OS=Homo sapiens]	cellular homeostasis	47011.8	86144.3	34910.3	40903.3	82051.5	19662.5	32023.1	32689.8	24244.6	56022.1	47539.1	29652.5	1.17844	-1.60321	1.88929	0.443316	0.681696	0.598142	0.598142
Q9BU61	NDUFAF3	25915	NADH dehydrogenase [ubiquinone] 1 alpha subcomplex assembly factor 3 [OS=Homo sapiens]	cell growth	95093.1	98545.5	92092.7	110419	77523.6	99707.4	90912.1	116001	106328	95243.8	95883.3	104414	-1.00671	1.08897	-1.09628	0.618087	0.951197	0.641039	0.641039
Q9BZH6	WDR11	55717	WD repeat-containing protein 11 [OS=Homo sapiens]	cell growth;conjugation;defense response;metabolic process	7184.56	8294.54	6809.14	8112.18	6168.17	5695.41	5477.8	9678.71	6793.19	7429.41	6658.59	7316.57	1.11576	1.09882	1.01542	0.803052	0.919658	0.919658	0.930125
Q6IAA8	LAMTOR1	55004	Ragulator complex protein LAMTOR1 [OS=Homo sapiens]	cell growth;conjugation;metabolic process	204150	138609	223680	163126	76417.2	208213	79139.4	161495	48172.8	188813	149252	96269.2	1.26506	-1.55036	1.9613	0.221339	0.431384	0.431384	0.28796
Q7Z3Z4	PIWIL4	143689	Piwi-like protein 4 [OS=Homo sapiens]	cell differentiation;cell proliferation;cellular component movement;cellular homeostasis;metabolic process	60135.6	82039.3	79478.1	69972	22321.6	56058.2	57790.8	50954.9	58839.7	73884.3	49450.6	55861.8	1.4941	1.12965	1.32263	0.230174	0.323085	0.639772	0.323085
Q8WXA9	SREK1	140890	Splicing regulatory glutamine/lysine-rich protein 1 [OS=Homo sapiens]	cellular component movement;cellular homeostasis	13893.4	26157.1	17444.7	14549.4	4325.73	13324.2	13948.6	10632.8	11433.9	19165.1	10733.1	12005.1	1.7856	1.11851	1.59641	0.161067	0.191775	0.764363	0.191775
O75909	CCNK	8812	Cyclin-K [OS=Homo sapiens]	cell differentiation;cell organization and biogenesis;cellular component movement;cellular homeostasis;coagulation;metabolic process	40279.3	40364.6	48052	35941.9	18065.1	37397.7	36295.9	35309.4	33729.5	42898.7	30468.2	35111.6	1.40798	1.1524	1.22178	0.155214	0.19667	0.433095	0.312863
Q9HAS0	C17orf75	64149	Protein Njmu-R1 [OS=Homo sapiens]	cell growth;conjugation	11073.6	12541.7	11355.9	7840.64	7996.44	8409.56	13788.7	11181.6	11040.6	11657	8082.22	12003.6	1.44231	1.48519	-1.02973	0.00576115	0.00751259	0.00751259	0.69025
Q15418	RPS6KA1	6195	Ribosomal protein S6 kinase alpha-1 [OS=Homo sapiens]	cell death;cell differentiation;cell organization and biogenesis;cellular homeostasis;coagulation;defense response;development;metabolic process	32533	19944.1	19217.6	22694.6	20358.6	19791.8	18098.6	22595.4	24737.8	23898.2	20948.3	21810.6	1.14082	1.04116	1.09572	0.753906	0.834077	0.834077	0.834077
Q9P032	NDUFAF4	29078	NADH dehydrogenase [ubiquinone] 1 alpha subcomplex assembly factor 4 [OS=Homo sapiens]	cell growth;coagulation	62883.8	73404.2	86440.5	21523.8	22234.8	40298.1	34956.4	25891.1	22056.9	74242.8	28018.9	27634.8	2.64974	-1.0139	2.68657	0.00176775	0.00189713	0.963785	0.00189713
Q9BXW6	OSBPL1A	114876	Oxysterol-binding protein-related protein 1 [OS=Homo sapiens]	cellular homeostasis;conjugation	7628.98	6450.91	6203.68	7189.18	7204.16	6921.37	5322.44	4917.23	5161.58	6761.19	7104.9	5133.75	-1.05084	-1.38396	1.31701	0.00431887	0.399636	0.00605407	0.00770705
Q7L523	RRAGA	10670	Ras-related GTP-binding protein A [OS=Homo sapiens]	coagulation;metabolic process	19784	24583.7	17683.3	10807.6	9245.36	10936.6	20106.5	22766.9	12553.7	20683.6	10329.8	18475.7	2.00232	1.78857	1.11951	0.0319527	0.0429195	0.0545598	0.494411
Q86TB9	PATL1	219988	Protein PAT1 homolog 1 [OS=Homo sapiens]	cell growth;cellular component movement;cellular homeostasis	25838.2	21910.6	31559.2	21761.9	20559	19683.9	20341.6	23751.8	20678.7	26436	20668.3	21590.7	1.27906	1.04463	1.22442	0.120862	0.151319	0.724994	0.151319
O94973	AP2A2	161	AP-2 complex subunit alpha-2 [OS=Homo sapiens]	conjugation	124053	147833	135847	59795.5	34563	75951.3	76271.2	78911.4	81406.7	135911	56769.9	78863.1	2.39407	1.38917	1.72338	0.00113734	0.00131822	0.100321	0.00363615
Q96GQ5	RUSF1	64755	RUS family member 1 [OS=Homo sapiens]		44186	46827.7	36173.7	84448.2	102061	72103	42988.3	41075.4	41028.3	42395.8	86204	41697.4	-2.03332	-2.06737	1.01675	0.00160653	0.00176214	0.00176214	0.929608
Q9Y2T2	AP3M1	26985	AP-3 complex subunit mu-1 [OS=Homo sapiens]	conjugation	237797	222393	261279	150584	95588.8	78527.4	225981	242151	196040	240490	108233	221390	2.22196	2.04549	1.08627	0.00234491	0.00348864	0.00385532	0.435182
Q03135	CAV1	857	Caveolin-1 [OS=Homo sapiens]	cell death;cell growth;cellular homeostasis;coagulation;conjugation;defense response;development;metabolic process	2.37182e+06	3.52452e+06	2.24471e+06	1.70872e+06	3.63217e+06	1.93782e+06	2.42823e+06	1.91914e+06	1.99549e+06	2.71368e+06	2.42624e+06	2.11429e+06	1.11847	-1.14754	1.2835	0.639283	0.654304	0.654304	0.654304
Q13526	PIN1	5300	Peptidyl-prolyl cis-trans isomerase NIMA-interacting 1 [OS=Homo sapiens]	cell differentiation;cell growth;cell organization and biogenesis;cellular homeostasis;coagulation;defense response;metabolic process	329538	255577	271652	173110	218078	176149	424771	334017	282668	285589	189112	347152	1.51015	1.83569	-1.21557	0.0214368	0.0808572	0.0234652	0.177822
O14949	UQCRQ	27089	Cytochrome b-c1 complex subunit 8 [OS=Homo sapiens]	cellular homeostasis;conjugation;defense response	61717.6	84113.8	132717	83148.8	45690.9	132104	85584.4	87710.4	61763.8	92849.4	86981.1	78352.9	1.06747	-1.11012	1.18502	0.871588	0.838079	0.838079	0.838079
Q7L2E3	DHX30	22907	ATP-dependent RNA helicase DHX30 [OS=Homo sapiens]	cell growth;defense response	33377.3	51833.4	49927.7	8660.93	16412.5	3228.47	27421.9	26743.6	14451.1	45046.2	9433.97	22872.2	4.77489	2.42445	1.96947	0.00500625	0.0052903	0.0905801	0.0238828
P00734	F2	2147	Prothrombin [OS=Homo sapiens]	cell organization and biogenesis;coagulation;defense response;development;metabolic process	87576.4	68209.7	51871.3	471442	510967	663878	325717	233865	409237	69219.1	548762	322940	-7.9279	-1.69927	-4.66547	0.000885673	0.000864741	0.0122634	0.0110006
Q96F86	EDC3	80153	Enhancer of mRNA-decapping protein 3 [OS=Homo sapiens]	cell growth;cellular component movement;cellular homeostasis	15667.8	18607.3	12065.9	10726.8	8560.8	9921.35	14671.5	19271.5	12349.1	15447	9736.31	15430.7	1.58654	1.58486	1.00106	0.0784702	0.0748668	0.0748668	0.994631
P31749	AKT1	207	RAC-alpha serine/threonine-protein kinase [OS=Homo sapiens]	cell death;cell differentiation;cell growth;cell organization and biogenesis;cellular homeostasis;coagulation;conjugation;defense response;development;metabolic process	78030.5	65366.5	53450.6	43299.7	52861.9	43107.7	64825	72441.6	70032.3	65615.9	46423.1	69099.6	1.41343	1.48847	-1.05309	0.028682	0.0410987	0.0410987	0.617715
P85037	FOXK1	221937	Forkhead box protein K1 [OS=Homo sapiens]	cellular homeostasis;coagulation;defense response;metabolic process	30944.1	33464.5	26563.8	31384	30321.6	28101.6	24811.6	31021	26041.2	30324.1	29935.7	27291.3	1.01297	-1.0969	1.11113	0.438166	0.876486	0.4677	0.4677
O76075	DFFB	1677	DNA fragmentation factor subunit beta [OS=Homo sapiens]	cell growth;cell proliferation;cellular homeostasis	8010.72	8053.33	7576.91	6114.81	10892.6	8798.53	6687.71	6002.76	8166.99	7880.32	8601.99	6952.49	-1.09158	-1.23725	1.13345	0.463854	0.584649	0.584649	0.584649
P40938	RFC3	5983	Replication factor C subunit 3 [OS=Homo sapiens]	cell growth;cell proliferation;cellular homeostasis;coagulation;metabolic process	170952	161021	158851	92382	76073.3	95476.7	172449	180775	147189	163608	87977.3	166804	1.85966	1.89599	-1.01954	0.000357461	0.000432218	0.000432218	0.761661
Q6ZR08	DNAH12	201625	Dynein axonemal heavy chain 12 [OS=Homo sapiens]	metabolic process	139702	146036	134963	139597	132831	129991	166142	154238	154829	140234	134140	158403	1.04543	1.18088	-1.12956	0.00520762	0.244101	0.0063997	0.01269
O43708	GSTZ1	2954	Maleylacetoacetate isomerase [OS=Homo sapiens]	cellular homeostasis;metabolic process	51155.8	37306.4	51634.5	43021.7	74988.8	65611	63829.2	59570.8	42316.8	46698.9	61207.1	55238.9	-1.31068	-1.10804	-1.18287	0.413467	0.578932	0.578932	0.578932
Q13501	SQSTM1	8878	Sequestosome-1 [OS=Homo sapiens]	cell growth;cell organization and biogenesis;cellular homeostasis;coagulation;conjugation;development;metabolic process	23472.7	32338.5	19500.1	24396.2	18697.6	29992.2	39107.1	43366.2	33481.2	25103.8	24362	38651.5	1.03045	1.58655	-1.53967	0.0390455	0.879941	0.0421675	0.0421675
O60216	RAD21	5885	Double-strand-break repair protein rad21 homolog [OS=Homo sapiens]	cell differentiation;cell growth;cell proliferation;cellular homeostasis;coagulation;metabolic process	215049	327820	279031	271285	89460.8	256198	320051	334287	306196	273966	205648	320178	1.33221	1.55692	-1.16868	0.191942	0.389963	0.246474	0.432426
Q9UJY4	GGA2	23062	ADP-ribosylation factor-binding protein GGA2 [OS=Homo sapiens]	conjugation;metabolic process	31538.8	32822.5	23559	23874	18594.3	15978.3	25449.4	33670.8	29832.6	29306.7	19482.2	29650.9	1.50428	1.52195	-1.01174	0.0499142	0.0512943	0.0512943	0.926926
Q12933	TRAF2	7186	TNF receptor-associated factor 2 [OS=Homo sapiens]	cell growth;cell organization and biogenesis;cellular homeostasis;coagulation;development;metabolic process	59654.5	68274.8	61274.8	30742.9	22104.3	29883.9	51499.9	53831.2	40284	63068	27577	48538.3	2.28698	1.7601	1.29934	0.000764069	0.00076494	0.00592504	0.0199614
Q9HCG8	CWC22	57703	Pre-mRNA-splicing factor CWC22 homolog [OS=Homo sapiens]	cellular component movement;cellular homeostasis;metabolic process	48869	63018	51274.6	30263.4	4836.1	27628.2	55118.5	57638.8	50452.6	54387.2	20909.2	54403.3	2.60111	2.60188	-1.0003	0.00705555	0.00720631	0.00720631	0.998395
Q03252	LMNB2	84823	Lamin-B2 [OS=Homo sapiens]		289423	1.29537e+06	924160	1.24118e+06	12409.6	1.02392e+06	895120	1.04433e+06	1.04837e+06	836319	759169	995940	1.10162	1.31188	-1.19086	0.832969	0.850996	0.850996	0.850996
Q7Z4H3	HDDC2	51020	5'-deoxynucleotidase HDDC2 [OS=Homo sapiens]	cellular homeostasis	13983.9	9418.79	16636.3	14734.4	25279.9	22343.1	19342.5	22121.8	11540	13346.3	20785.8	17668.1	-1.55742	-1.17646	-1.32382	0.256817	0.343025	0.468416	0.468416
P84090	ERH	2079	Enhancer of rudimentary homolog [OS=Homo sapiens]	cell differentiation;cellular homeostasis	139272	220165	194269	334212	57890.4	532066	402603	323110	248601	184569	308056	324771	-1.66906	1.05426	-1.75962	0.484356	0.512431	0.893419	0.512431
Q8WWY3	PRPF31	26121	U4/U6 small nuclear ribonucleoprotein Prp31 [OS=Homo sapiens]	cell growth;cellular component movement;cellular homeostasis;metabolic process	96940.8	177008	184544	100675	46850.4	100589	145035	134209	87178.3	152831	82704.9	122141	1.8479	1.47683	1.25127	0.153218	0.189109	0.357427	0.357427
Q9P015	MRPL15	29088	39S ribosomal protein L15, mitochondrial [OS=Homo sapiens]	cell organization and biogenesis;cellular homeostasis;metabolic process	168918	139913	197125	94821.3	74837	75210.6	120585	113458	108581	168652	81623	114208	2.06623	1.39921	1.47671	0.00306356	0.00321384	0.06992	0.0155147
Q9H267	VPS33B	26276	Vacuolar protein sorting-associated protein 33B [OS=Homo sapiens]	cell growth;cell organization and biogenesis;cellular homeostasis;conjugation;metabolic process	50652.1	45249	41179	35963.9	39256.1	43242.6	51495.1	48288.1	45925.6	45693.4	39487.5	48569.6	1.15716	1.23	-1.06295	0.0655867	0.140215	0.0804131	0.391526
Q9Y320	TMX2	51075	Thioredoxin-related transmembrane protein 2 [OS=Homo sapiens]	defense response	275900	213568	236393	99984.1	86881.4	101534	158839	170429	150218	241954	96133	159828	2.51687	1.66258	1.51383	0.000308727	0.000301565	0.00742133	0.00329824
Q9UFC0	LRWD1	222229	Leucine-rich repeat and WD repeat-containing protein 1 [OS=Homo sapiens]	cell growth;cell proliferation;cellular homeostasis;metabolic process	52627.4	56681.2	51697.4	32396.1	24171	33662.5	38793.4	41884.9	53130.4	53668.6	30076.5	44602.9	1.7844	1.48298	1.20325	0.00541524	0.00570129	0.0265612	0.0897189
Q9UIV1	CNOT7	29883	CCR4-NOT transcription complex subunit 7 [OS=Homo sapiens]	cell growth;cellular component movement;cellular homeostasis;coagulation;metabolic process	10287.1	9837.57	9255.35	7930.07	6239.63	6615.9	10936	10994.8	9912.87	9793.35	6928.53	10614.6	1.41348	1.53201	-1.08385	0.00142755	0.0033646	0.0018188	0.194828
Q9NZM3	ITSN2	50618	Intersectin-2 [OS=Homo sapiens]	conjugation;metabolic process	26083.4	25518.6	24512	5797.67	3180.4	3705.85	18661.7	18660.6	17129.2	25371.3	4227.97	18150.5	6.00082	4.29296	1.39783	8.64597e-07	8.97214e-07	5.32146e-06	0.000156041
Q96RD7	PANX1	24145	Pannexin-1 [OS=Homo sapiens]	cell death;coagulation;conjugation;metabolic process	8299.13	9559.2	6415.93	17906.4	18054.8	15168.7	9117.79	8921.96	8745.71	8091.42	17043.3	8928.49	-2.10634	-1.90887	-1.10345	0.000286783	0.000415717	0.000415717	0.464856
P24752	ACAT1	38	Acetyl-CoA acetyltransferase, mitochondrial [OS=Homo sapiens]	cellular homeostasis;coagulation;defense response;metabolic process	447107	345414	454024	365278	331351	276377	224561	328179	329824	415515	324335	294188	1.28113	-1.10248	1.41241	0.0842842	0.138515	0.532869	0.112253
Q9BWS9	CHID1	66005	Chitinase domain-containing protein 1 [OS=Homo sapiens]	cellular homeostasis;coagulation;metabolic process	15568.5	22414.7	20264.4	29889.6	18931.8	21729.7	23617.9	20865.4	18444	19415.9	23517	20975.8	-1.21123	-1.12115	-1.08034	0.511711	0.66058	0.66058	0.66058
Q9H0M0	WWP1	11059	NEDD4-like E3 ubiquitin-protein ligase WWP1 [OS=Homo sapiens]	cell organization and biogenesis;cellular homeostasis;conjugation;defense response;development;metabolic process	9139.18	10878.6	8899.06	4623.44	4180.03	6113.8	11396.1	11094	9785.32	9638.95	4972.42	10758.5	1.93848	2.16363	-1.11615	0.000826625	0.00174771	0.0011107	0.214393
P07099	EPHX1	2052	Epoxide hydrolase 1 [OS=Homo sapiens]	cellular homeostasis;metabolic process	25386.3	24817.2	28514.9	19224.6	23317.4	6481.73	13919	19870.4	17182.6	26239.5	16341.3	16990.7	1.60572	1.03974	1.54435	0.12087	0.126048	0.889264	0.126048
Q6N069	NAA16	79612	N-alpha-acetyltransferase 16, NatA auxiliary subunit [OS=Homo sapiens]	cell organization and biogenesis;cellular homeostasis;metabolic process	7975.78	8945.14	10359.7	5947.62	6491.05	7862.21	8597.02	8020.96	7389.73	9093.55	6766.96	8002.57	1.34382	1.18259	1.13633	0.0667975	0.0756052	0.214146	0.214146
O95210	STBD1	8987	Starch-binding domain-containing protein 1 [OS=Homo sapiens]	cellular homeostasis;conjugation	81639.4	88191.7	106796	210106	71193.5	183009	131189	110501	120367	92208.9	154770	120685	-1.67847	-1.28242	-1.30882	0.286794	0.387837	0.454135	0.454135
P40818	USP8	9101	Ubiquitin carboxyl-terminal hydrolase 8 [OS=Homo sapiens]	cell differentiation;cell growth;cell organization and biogenesis;cellular homeostasis;development;metabolic process	96946.7	38326.9	93455.6	59127.8	70158.3	55607.4	73790.9	96454	84952.3	76243	61631.1	85065.8	1.23709	1.38024	-1.11572	0.423508	0.617929	0.617929	0.617929
P19793	RXRA	6256	Retinoic acid receptor RXR-alpha [OS=Homo sapiens]	cellular homeostasis;development;metabolic process	81669.1	71687.7	91430.1	30082.4	13729.4	30117.9	67695.4	79478.3	71882.9	81595.6	24643.2	73018.9	3.31107	2.96304	1.11746	0.000387576	0.000569624	0.000697407	0.268291
O75569	PRKRA	8575	Interferon-inducible double-stranded RNA-dependent protein kinase activator A [OS=Homo sapiens]	cell organization and biogenesis;cellular component movement;cellular homeostasis;coagulation;defense response;metabolic process	70292.8	98074.8	93230	105264	77674.8	77016	74164.1	69596.6	78833.9	87199.2	86651.6	74198.2	1.00632	-1.16784	1.17522	0.431401	0.960313	0.424171	0.424171
O95825	CRYZL1	9946	Quinone oxidoreductase-like protein 1 [OS=Homo sapiens]	cellular homeostasis	86589.4	92491.4	87161.9	36049.1	91931.7	29222.2	102163	103688	95686	88747.5	52401	100512	1.69362	1.91814	-1.13257	0.0598416	0.103083	0.0787364	0.500445
Q9H7B2	RPF2	84154	Ribosome production factor 2 homolog [OS=Homo sapiens]	cell growth;cellular component movement;cellular homeostasis;metabolic process	6260.85	20476.4	13599	12258.7	5894.86	11859.1	29600.2	25877.5	21547.5	13445.4	10004.2	25675.1	1.34398	2.56642	-1.90957	0.0221628	0.444203	0.0292564	0.0404777
Q6P996	PDXDC1	23042	Pyridoxal-dependent decarboxylase domain-containing protein 1 [OS=Homo sapiens]	cellular homeostasis;metabolic process	523866	562325	411599	430692	355313	334173	452510	498311	501275	499263	373393	484032	1.3371	1.29631	1.03147	0.0641984	0.0784645	0.0784645	0.750976
Q14149	MORC3	23515	MORC family CW-type zinc finger protein 3 [OS=Homo sapiens]	cell organization and biogenesis;cellular homeostasis;defense response;metabolic process	20389.5	16761.1	19030.9	13135.8	6735.69	13477.7	19323.5	17395.1	17125.3	18727.2	11116.4	17948	1.68464	1.61455	1.04341	0.0191652	0.0244409	0.0244409	0.719121
P46013	MKI67	4288	Proliferation marker protein Ki-67 [OS=Homo sapiens]	cell differentiation;metabolic process	52889.1	59046.9	38631.8	38101.9	8291.34	16081.9	119354	105986	113400	50189.3	20825	112913	2.41005	5.422	-2.24975	0.000175303	0.0200694	0.000189707	0.000800231
Q8TD55	PLEKHO2	80301	Pleckstrin homology domain-containing family O member 2 [OS=Homo sapiens]		76825.2	50031.9	68393.6	50774.3	35448.5	34790.1	61118.2	68326.4	71183.6	65083.5	40337.6	66876	1.61347	1.65791	-1.02754	0.029771	0.0338059	0.0338059	0.83252
P54802	NAGLU	4669	Alpha-N-acetylglucosaminidase [OS=Homo sapiens]	cell growth;cellular homeostasis;defense response;metabolic process	22060.3	21883.4	24338.2	23734.3	13593.4	12788.8	16102.1	23133.8	12642.2	22760.6	16705.5	17292.7	1.36246	1.03515	1.3162	0.299668	0.312311	0.884609	0.312311
Q5JTH9	RRP12	23223	RRP12-like protein [OS=Homo sapiens]	cellular component movement;cellular homeostasis	45265.8	48264.8	50102.4	38858.9	15409.3	27909.8	71899.2	72765.5	68357.4	47877.7	27392.7	71007.4	1.74783	2.5922	-1.4831	0.000844103	0.0119421	0.000823866	0.010457
Q13868	EXOSC2	23404	Exosome complex component RRP4 [OS=Homo sapiens]	cellular component movement;cellular homeostasis;metabolic process	110853	150229	124776	120568	78953.4	98782.9	150550	163375	158212	128619	99434.8	157379	1.29351	1.58274	-1.2236	0.0170866	0.084575	0.0178589	0.084575
Q96B26	EXOSC8	11340	Exosome complex component RRP43 [OS=Homo sapiens]	cellular component movement;cellular homeostasis	14423.3	20262.2	18392.6	10603.7	5238.72	10232.7	20300.4	22366	15991	17692.7	8691.7	19552.4	2.03559	2.24955	-1.10511	0.01056	0.0174656	0.0149541	0.487414
Q8N3U4	STAG2	10735	Cohesin subunit SA-2 [OS=Homo sapiens]	cell differentiation;cell growth;metabolic process	302486	370074	343591	327777	88993.3	280366	319311	352058	328178	338717	232378	333182	1.45761	1.43379	1.01661	0.236602	0.234608	0.234608	0.932029
O95140	MFN2	9927	Mitofusin-2 [OS=Homo sapiens]	cell growth;cellular homeostasis;coagulation;conjugation;defense response;metabolic process	36379.7	32633.9	29518.8	38986.3	39764.5	36556.5	39307.3	34477.6	28202.1	32844.1	38435.8	33995.7	-1.17025	-1.13061	-1.03506	0.256706	0.318828	0.318828	0.729956
Q9UJW3	DNMT3L	29947	DNA (cytosine-5)-methyltransferase 3-like [OS=Homo sapiens]	cell differentiation;cell growth;cell proliferation;cellular homeostasis;metabolic process	280642	393579	275621	199501	90666.8	178846	192470	191612	266316	316614	156338	216799	2.02519	1.38674	1.4604	0.0355594	0.0401665	0.239056	0.111461
Q8N4V1	MMGT1	93380	ER membrane protein complex subunit 5 [OS=Homo sapiens]	cell growth;conjugation	106865	81361.3	123669	84457	64173.7	132293	113932	92039.5	84923.8	103965	93641.3	96965	1.11025	1.03549	1.07219	0.879531	0.876995	0.876995	0.876995
Q7Z3T8	ZFYVE16	9765	Zinc finger FYVE domain-containing protein 16 [OS=Homo sapiens]	cell growth;conjugation;development;metabolic process	11060.4	12231.2	9792.28	1910.65	3298.5	2593.93	5362.75	5101.24	9507.97	11027.9	2601.03	6657.32	4.23985	2.5595	1.65651	0.00228375	0.00225873	0.0231902	0.0231902
Q9NX46	ADPRS	54936	ADP-ribose glycohydrolase ARH3 [OS=Homo sapiens]	cell organization and biogenesis;cell proliferation;cellular homeostasis;coagulation	48571.4	43339.2	33044.6	53491.9	57031.7	42175.1	49797.9	51663	42624.6	41651.7	50899.6	48028.5	-1.22203	-1.05978	-1.1531	0.319823	0.457218	0.631507	0.457218
Q96A49	SYAP1	94056	Synapse-associated protein 1 [OS=Homo sapiens]	development;metabolic process	12480	15053.9	14803.2	3276.72	24601.4	6664.64	14965.9	16421.2	11426.8	14112.4	11514.3	14271.3	1.22564	1.23945	-1.01126	0.860468	0.978187	0.978187	0.978187
Q9Y3D3	MRPS16	51021	28S ribosomal protein S16, mitochondrial [OS=Homo sapiens]	cell organization and biogenesis;cellular homeostasis	116556	96060.1	116670	72806.4	84390	71968.4	79103.6	111405	81049.2	109762	76388.3	90519.2	1.4369	1.18499	1.21258	0.0550916	0.0622837	0.235518	0.184177
Q9P0R6	GSKIP	51527	GSK3B-interacting protein [OS=Homo sapiens]	coagulation;development;metabolic process	8546.31	7502.74	11557.2	8960.71	9955.93	5113.99	14939.5	17718.4	14927.5	9202.07	8010.21	15861.8	1.14879	1.9802	-1.72372	0.00818488	0.51792	0.012005	0.0128827
Q9BYD2	MRPL9	65005	39S ribosomal protein L9, mitochondrial [OS=Homo sapiens]	cell organization and biogenesis;cellular homeostasis	14836.3	25932.3	16407	9440.65	9178.61	7004.99	11807.6	7968.84	9810.09	19058.5	8541.42	9862.18	2.23131	1.15463	1.93249	0.0261031	0.0347668	0.678926	0.0347668
P01023	A2M	2	Alpha-2-macroglobulin [OS=Homo sapiens]	metabolic process	338451	191382	10898.3	1.76548e+06	5.95065e+06	2.27166e+06	2.12664e+06	1.16243e+06	3.38338e+06	180244	3.32926e+06	2.22415e+06	-18.4709	-1.49687	-12.3397	0.0964158	0.118256	0.392783	0.209308
Q9HCU5	PREB	10113	Prolactin regulatory element-binding protein [OS=Homo sapiens]	cell growth;conjugation;metabolic process	60763.4	43306.8	43098.8	44203.8	42179.7	33978.1	38987.5	48246.2	43713.7	49056.3	40120.6	43649.1	1.22272	1.08795	1.12388	0.367779	0.530891	0.567933	0.567933
Q9BQ61	TRIR	79002	Telomerase RNA component interacting RNase [OS=Homo sapiens]	cellular component movement;cellular homeostasis	12807.9	32264.4	27219	15631.7	18362.6	17370.4	31996.5	33526.5	29784.7	24097.1	17121.6	31769.2	1.40741	1.85551	-1.31838	0.0640445	0.20325	0.0721837	0.20325
P22830	FECH	2235	Ferrochelatase, mitochondrial [OS=Homo sapiens]	cellular homeostasis;metabolic process	38234.8	37531.6	32627.4	18231.9	31966.2	16798.3	19302.7	18937.3	16440.4	36131.2	22332.1	18226.8	1.6179	-1.22523	1.98231	0.0132774	0.0267016	0.373017	0.0171091
Q06546	GABPA	2551	GA-binding protein alpha chain [OS=Homo sapiens]	defense response;metabolic process	50133	65394.6	42222.5	16805.2	31457.1	17016.6	38721.7	40651.1	44926.6	52583.4	21759.6	41433.1	2.41656	1.90413	1.26911	0.012308	0.0134886	0.0456654	0.161378
O75191	XYLB	9942	Xylulose kinase [OS=Homo sapiens]	cellular homeostasis	34899.4	37564.3	36737.2	34569.2	31784.6	23707.5	28613.3	32325.9	27573.4	36400.3	30020.4	29504.2	1.21252	-1.0175	1.23373	0.106681	0.113953	0.868114	0.113953
Q9UQB8	BAIAP2	10458	Brain-specific angiogenesis inhibitor 1-associated protein 2 [OS=Homo sapiens]	cell growth;defense response;development;metabolic process	24388	27755.6	22414.6	26244.9	13574.2	25297.2	4896.77	20026.6	17080.5	24852.7	21705.5	14001.3	1.145	-1.55024	1.77503	0.180351	0.566825	0.282894	0.245192
Q9HAT2	SIAE	54414	Sialate O-acetylesterase [OS=Homo sapiens]	cellular homeostasis;metabolic process	49895.2	40869.9	47869.8	36973.4	36076.9	33316.8	38958.1	34005.5	34082.5	46211.6	35455.7	35682	1.30336	1.00638	1.29509	0.0123879	0.0130718	0.937151	0.0130718
Q8IXH7	NELFCD	51497	Negative elongation factor C/D [OS=Homo sapiens]	metabolic process	54463	57280.1	48359.2	39790.6	9887.69	33086.8	49451.7	46588.2	45636.9	53367.4	27588.4	47225.6	1.93442	1.71179	1.13005	0.0367609	0.0478843	0.0669601	0.458789
P49366	DHPS	1725	Deoxyhypusine synthase [OS=Homo sapiens]	cell organization and biogenesis;cellular homeostasis;metabolic process	2856.36	2395.52	3419.01	6268	6270.85	3332.9	4229.81	4719.51	5496.47	2890.29	5290.58	4815.26	-1.83047	-1.09871	-1.66601	0.0754	0.10612	0.611549	0.109779
Q9BT73	PSMG3	84262	Proteasome assembly chaperone 3 [OS=Homo sapiens]	cell growth	37326.6	36624.2	29747.7	32529.7	29170.7	22010	34439.5	34812.2	28891.7	34566.2	27903.5	32714.5	1.23878	1.17241	1.0566	0.236019	0.334121	0.339927	0.622695
Q99828	CIB1	10519	Calcium and integrin-binding protein 1 [OS=Homo sapiens]	cell communication;cell differentiation;cell growth;cell proliferation;cellular homeostasis;coagulation;defense response;development;metabolic process	2649.03	3043.8	2116.81	6684.97	7926.82	4710.1	1973.17	2758.02	3264.55	2603.21	6440.63	2665.25	-2.47411	-2.41652	-1.02383	0.00624661	0.0066493	0.0066493	0.944365
Q7L0X0	TRIL	9865	TLR4 interactor with leucine rich repeats [OS=Homo sapiens]	coagulation;development;metabolic process	24680	21188.2	26896.6	33291.4	41943.4	43454.4	34809.2	26275.4	32935.4	24254.9	39563.1	31340	-1.63114	-1.26238	-1.29211	0.0154909	0.0161963	0.0940327	0.0969437
Q92754	TFAP2C	7022	Transcription factor AP-2 gamma [OS=Homo sapiens]	cell death;cell growth;defense response;metabolic process	92313.2	285237	181152	216413	37243.6	300617	261672	293995	254156	186234	184758	269941	1.00799	1.46105	-1.44947	0.504737	0.98564	0.492558	0.492558
P11441	UBL4A	8266	Ubiquitin-like protein 4A [OS=Homo sapiens]	cell growth;cell organization and biogenesis;cellular homeostasis	203248	152115	204801	235785	191440	359249	210520	200298	195678	186721	262158	202165	-1.40401	-1.29675	-1.08271	0.263764	0.32569	0.32569	0.734754
Q92599	SEPTIN8	23176	Septin-8 [OS=Homo sapiens]	cell differentiation;metabolic process	91086.5	106158	95064.3	85258.2	73789.6	69468.7	84715.1	77769	63586.1	97436.2	76172.2	75356.7	1.27916	-1.01082	1.293	0.0397409	0.0415229	0.915357	0.0415229
Q3YEC7	RABL6	55684	Rab-like protein 6 [OS=Homo sapiens]		157976	192814	171824	179041	186715	180344	195120	164375	169242	174205	182033	176246	-1.04494	-1.03284	-1.01172	0.787732	0.865238	0.865238	0.865238
Q96GZ6	SLC41A3	54946	Solute carrier family 41 member 3 [OS=Homo sapiens]	conjugation	43510.5	49167.3	59933.2	72551.3	78983.1	59637.1	46295.4	29951.8	38116.8	50870.3	70390.5	38121.3	-1.38372	-1.84649	1.33443	0.0117836	0.0526481	0.0125744	0.127115
Q9UBW8	COPS7A	50813	COP9 signalosome complex subunit 7a [OS=Homo sapiens]	cell growth;cell organization and biogenesis;cellular homeostasis	9055.8	9169.53	15191.5	7519.06	8131.35	8590.94	11851.2	12413.9	7315.91	11139	8080.45	10527	1.37851	1.30277	1.05813	0.376615	0.441758	0.441758	0.783578
Q96GW9	MARS2	92935	Methionine--tRNA ligase, mitochondrial [OS=Homo sapiens]	cell organization and biogenesis;cellular component movement;cellular homeostasis	20950.6	14534.9	16627.5	11562.9	13684.7	13784.1	14816.4	14294.7	12397.1	17371	13010.6	13836.1	1.33515	1.06345	1.25549	0.0995159	0.136484	0.655161	0.136484
Q9BRP8	PYM1	84305	Partner of Y14 and mago [OS=Homo sapiens]	cell growth;cellular component movement;cellular homeostasis;metabolic process	483242	388693	620894	511412	405722	636105	548451	582513	441237	497610	517747	524067	-1.04047	1.01221	-1.05317	0.948744	0.943019	0.943019	0.943019
O43837	IDH3B	3420	Isocitrate dehydrogenase [NAD] subunit beta, mitochondrial [OS=Homo sapiens]	cellular homeostasis	83873.2	103536	74360.6	41211.6	69202.6	47482.2	70716.2	68487.1	67843.1	87256.5	52632.1	69015.5	1.65786	1.31128	1.2643	0.0353093	0.0382981	0.148404	0.148404
Q5T653	MRPL2	51069	39S ribosomal protein L2, mitochondrial [OS=Homo sapiens]	cell organization and biogenesis;cellular homeostasis	46580.3	125189	52018	92327.9	31353.5	70924.9	89787.2	96791	103339	74595.8	64868.8	96639.2	1.14995	1.48976	-1.2955	0.486689	0.716191	0.631275	0.631275
Q9P0U1	TOMM7	54543	Mitochondrial import receptor subunit TOM7 homolog [OS=Homo sapiens]	cell growth;coagulation;conjugation;metabolic process	5509.74	13074.2	10781.6	10989.4	4019.95	10397.9	15399.7	15689.5	9999.72	9788.51	8469.07	13696.3	1.1558	1.61722	-1.39922	0.268129	0.674529	0.358755	0.358755
P20936	RASA1	5921	Ras GTPase-activating protein 1 [OS=Homo sapiens]	cell differentiation;cell growth;defense response;development;metabolic process	83531.1	49089.4	75836.2	24917.4	24380.7	20872.3	86513	103832	44683.9	69485.5	23390.1	78343	2.97072	3.3494	-1.12747	0.0342682	0.0493619	0.0493619	0.615072
P36873	PPP1CC	5501	Serine/threonine-protein phosphatase PP1-gamma catalytic subunit [OS=Homo sapiens]	cell differentiation;cell organization and biogenesis;cellular homeostasis;defense response;development;metabolic process	185077	176703	176976	108602	84298.4	76878.8	163742	157295	161633	179585	89926.3	160890	1.99703	1.78913	1.1162	8.50707e-05	0.000110457	0.000208359	0.064821
Q8NHQ9	DDX55	57696	ATP-dependent RNA helicase DDX55 [OS=Homo sapiens]		24318	15802.7	31433.3	16278.9	6082.57	7078.18	18740.3	25305.5	22006.5	23851.3	9813.23	22017.4	2.43053	2.24365	1.08329	0.0516129	0.0658297	0.0658297	0.715504
Q8IVP5	FUNDC1	139341	FUN14 domain-containing protein 1 [OS=Homo sapiens]	cell growth;cellular homeostasis;coagulation;metabolic process	4497.09	5332.22	4827.88	4584.41	4694.81	5261.51	5684.44	5409.86	6039.47	4885.73	4846.91	5711.26	1.00801	1.17833	-1.16897	0.0480571	0.901698	0.0506022	0.0506022
Q9NX24	NHP2	55651	H/ACA ribonucleoprotein complex subunit 2 [OS=Homo sapiens]	cell growth;cell proliferation;cellular component movement;cellular homeostasis	20907.4	32004.8	29302.8	15499.6	10246.7	15257.4	35084.9	34296.6	30051.8	27405	13667.9	33144.4	2.00506	2.42498	-1.20943	0.00284541	0.009146	0.0032571	0.13462
Q8TEQ6	GEMIN5	25929	Gem-associated protein 5 [OS=Homo sapiens]	cell growth;cell organization and biogenesis;cellular component movement;cellular homeostasis;metabolic process	301327	345416	306531	226983	140948	182484	238820	276957	249134	317758	183472	254970	1.73192	1.3897	1.24626	0.00512216	0.00516736	0.0434472	0.046042
Q96I59	NARS2	79731	Probable asparagine--tRNA ligase, mitochondrial [OS=Homo sapiens]	cell organization and biogenesis;cellular component movement;cellular homeostasis	102629	86815.1	92903.9	81774.6	101075	77567	24216	56820.6	65869.4	94116	86805.6	48968.7	1.08422	-1.77268	1.92196	0.0230465	0.579347	0.034555	0.0333758
Q5VV41	ARHGEF16	27237	Rho guanine nucleotide exchange factor 16 [OS=Homo sapiens]	metabolic process	41647.8	39113.2	39921.2	39461.2	47896.2	38489.4	37105.4	43998.9	39002.7	40227.4	41948.9	40035.7	-1.04279	-1.04779	1.00479	0.791654	0.884545	0.884545	0.951487
P05067	APP	351	Amyloid-beta precursor protein [OS=Homo sapiens]	cell communication;cell growth;cell organization and biogenesis;cellular component movement;cellular homeostasis;coagulation;conjugation;defense response;development;metabolic process	119582	161761	149236	449907	437103	360555	160906	128336	124847	143527	415855	138030	-2.89741	-3.0128	1.03983	6.66997e-05	7.70154e-05	7.70154e-05	0.843479
P05114	HMGN1	3150	Non-histone chromosomal protein HMG-14 [OS=Homo sapiens]	cell growth;cell proliferation;coagulation;defense response;metabolic process	67314.3	168230	75524	92420.7	59244.7	71284.8	98604.7	51050.1	93846.1	103689	74316.7	81167	1.39524	1.09218	1.27748	0.62051	0.726341	0.828185	0.726341
Q9UQ35	SRRM2	23524	Serine/arginine repetitive matrix protein 2 [OS=Homo sapiens]	cellular component movement;cellular homeostasis	151181	119879	134327	116901	29857	113298	136649	129328	102879	135129	86685.4	122952	1.55884	1.41837	1.09904	0.227561	0.313248	0.313248	0.653142
P19838	NFKB1	4790	Nuclear factor NF-kappa-B p105 subunit [OS=Homo sapiens]	cellular component movement;cellular homeostasis;coagulation;development;metabolic process	57139.7	59690.7	62974	42350.7	37498.3	48949	55745	60869.7	47332.2	59934.8	42932.7	54649	1.39602	1.2729	1.09672	0.0219367	0.0257331	0.0574347	0.277815
Q9UP95	SLC12A4	6560	Solute carrier family 12 member 4 [OS=Homo sapiens]	cell death;cell growth;conjugation;metabolic process	39094.1	43471	38284.2	24343.1	6077.38	22464.5	28650.4	10691.7	26729.2	40283.1	17628.3	22023.8	2.28513	1.24934	1.82908	0.0334974	0.0463384	0.539955	0.0534411
P37198	NUP62	23636	Nuclear pore glycoprotein p62 [OS=Homo sapiens]	cell differentiation;cell growth;conjugation;development;metabolic process	63834.2	71015.3	69523.3	58995.4	24904.3	71301	60454.1	88618.8	75127.6	68124.3	51733.6	74733.5	1.31683	1.44458	-1.09702	0.278033	0.39363	0.39363	0.635769
Q9UHR4	BAIAP2L1	55971	Brain-specific angiogenesis inhibitor 1-associated protein 2-like protein 1 [OS=Homo sapiens]	cell growth;metabolic process	57815.3	70885	57752.6	27388.4	24964.4	20023.6	44122.2	42470.6	43647.4	62151	24125.5	43413.4	2.57616	1.79949	1.43161	0.000241512	0.000231958	0.00338325	0.00338325
P51946	CCNH	902	Cyclin-H [OS=Homo sapiens]	cell differentiation;cell organization and biogenesis;cellular component movement;cellular homeostasis;metabolic process	26613.4	28683.3	24520.6	9294.66	10873.2	6236.48	23373.1	31481.9	21929.1	26605.7	8801.43	25594.7	3.02289	2.90802	1.0395	0.00126719	0.00157404	0.00157404	0.734411
O14497	ARID1A	8289	AT-rich interactive domain-containing protein 1A [OS=Homo sapiens]	cell growth;defense response;development;metabolic process	31408.1	32652.9	29474.4	29872.9	63735.6	21112.2	30204.2	26644.7	26421.4	31178.4	38240.2	27756.8	-1.2265	-1.37769	1.12327	0.629385	0.759652	0.759652	0.759652
Q00796	SORD	6652	Sorbitol dehydrogenase [OS=Homo sapiens]	cellular homeostasis;coagulation;metabolic process	364871	423144	330645	455657	559860	404235	292661	216181	276312	372887	473251	261718	-1.26915	-1.80825	1.42477	0.0123443	0.0784041	0.0127684	0.0784041
Q9BYJ9	YTHDF1	54915	YTH domain-containing family protein 1 [OS=Homo sapiens]	cell growth;metabolic process	55514.4	21441	24535.7	9108.23	3629.78	13093.1	18223.8	17479.3	13947.3	33830.4	8610.38	16550.1	3.92902	1.92211	2.04411	0.0818657	0.101976	0.422403	0.165219
O43172	PRPF4	9128	U4/U6 small nuclear ribonucleoprotein Prp4 [OS=Homo sapiens]	cellular component movement;cellular homeostasis	109802	172516	120937	93380.1	15482.9	77731.5	97147.5	110232	115545	134418	62198.2	107641	2.16113	1.73062	1.24876	0.0745954	0.0885397	0.186023	0.332677
Q13085	ACACA	31	Acetyl-CoA carboxylase 1 [OS=Homo sapiens]	cell growth;cell organization and biogenesis;cellular homeostasis;metabolic process	1.84541e+06	2.16896e+06	1.96025e+06	838231	850098	715663	1.32234e+06	1.17679e+06	1.44068e+06	1.99154e+06	801331	1.31327e+06	2.48529	1.63886	1.51647	8.86935e-05	8.61759e-05	0.00282056	0.000994852
Q96TA2	YME1L1	10730	ATP-dependent zinc metalloprotease YME1L1 [OS=Homo sapiens]	cell differentiation;cell growth;cell organization and biogenesis;cellular homeostasis;metabolic process	24094.3	25471.5	25364.6	10954.3	8423.88	9798.98	21155.3	20411.6	18887.8	24976.8	9725.71	20151.6	2.56812	2.07199	1.23945	6.84319e-06	7.35635e-06	3.39841e-05	0.00158784
Q14008	CKAP5	9793	Cytoskeleton-associated protein 5 [OS=Homo sapiens]	cell differentiation;cell growth;conjugation;metabolic process	642685	697204	634637	385267	367605	347479	578643	562056	522845	658175	366784	554514	1.79445	1.51183	1.18694	4.09868e-05	4.21579e-05	0.000259367	0.00389757
Q8N3R9	PALS1	64398	Protein PALS1 [OS=Homo sapiens]	cell growth;cellular homeostasis;defense response;metabolic process	14658.4	9664.82	11729.8	9243.01	5426.89	5731.4	9165.58	8183.86	8001.12	12017.7	6800.43	8450.19	1.76719	1.2426	1.42218	0.0406988	0.0486705	0.335702	0.0964631
Q13505	MTX1	4580	Metaxin-1 [OS=Homo sapiens]	cell growth;conjugation;defense response	82682.7	69390.9	98562.6	54394.9	41616.3	52982.1	66411.9	74845.9	59903.1	83545.4	49664.5	67053.6	1.6822	1.35013	1.24595	0.0196845	0.0207079	0.0976631	0.0976631
Q92747	ARPC1A	10552	Actin-related protein 2/3 complex subunit 1A [OS=Homo sapiens]	cell growth	35676.5	39661.2	53604.2	43100.3	35132.9	38077.6	51989.3	45621.6	56237.3	42980.6	38770.3	51282.8	1.1086	1.32273	-1.19316	0.143143	0.468695	0.183757	0.267201
Q9P2D3	HEATR5B	54497	HEAT repeat-containing protein 5B [OS=Homo sapiens]	conjugation;metabolic process	7483.28	10993.8	12208.2	6071.2	4843.64	3827.8	9797.33	12463.6	10112.3	10228.4	4914.21	10791.1	2.0814	2.19589	-1.05501	0.0121138	0.0155728	0.0155728	0.710581
O95479	H6PD	9563	GDH/6PGL endoplasmic bifunctional protein [OS=Homo sapiens]	cellular homeostasis;metabolic process	21944.8	16742.7	22289.2	51090	83001.9	44101.1	9387.6	42099.1	8702.33	20325.6	59397.7	20063	-2.92231	-2.96056	1.01309	0.0405169	0.03979	0.03979	0.984964
Q9Y512	SAMM50	25813	Sorting and assembly machinery component 50 homolog [OS=Homo sapiens]	cell growth;conjugation	197422	192678	198185	148840	48803.7	158761	109490	124177	121635	196095	118802	118434	1.65061	-1.00311	1.65574	0.0574032	0.0555062	0.990274	0.0555062
P24928	POLR2A	5430	DNA-directed RNA polymerase II subunit RPB1 [OS=Homo sapiens]	cellular component movement;cellular homeostasis;metabolic process	157356	195484	171720	115882	59722.2	97453.5	153955	149538	157335	174853	91019.1	153609	1.92106	1.68766	1.1383	0.0053245	0.0065228	0.0130807	0.241977
Q96GC9	VMP1	81671	Vacuole membrane protein 1 [OS=Homo sapiens]	cell communication;cell growth;cellular homeostasis;conjugation;defense response;metabolic process	77245.7	93929.7	61213.7	61510.1	80924.6	47849	52130.7	48619.8	57660.8	77463	63427.9	52803.8	1.22128	-1.2012	1.467	0.167852	0.379525	0.379525	0.209906
Q9H875	PRKRIP1	79706	PRKR-interacting protein 1 [OS=Homo sapiens]	cellular component movement;cellular homeostasis;metabolic process	14225	27230	10120.5	30012.9	20234.7	28392.3	11515.1	22201.6	25631.3	17191.8	26213.3	19782.7	-1.52475	-1.32506	-1.1507	0.363738	0.486421	0.486421	0.68047
Q15382	RHEB	6009	GTP-binding protein Rheb [OS=Homo sapiens]	defense response;development;metabolic process	224757	168857	171888	243478	287245	272256	218064	226768	219825	188501	267659	221552	-1.41994	-1.20811	-1.17534	0.0139626	0.0147896	0.0677532	0.120634
Q9NRG9	AAAS	8086	Aladin [OS=Homo sapiens]	cell differentiation;cell growth;conjugation;metabolic process	50500	71433.2	47327.2	67258.9	25117.3	45251.2	66374.3	94012.4	75736.4	56420.1	45875.8	78707.7	1.22984	1.71567	-1.39503	0.118438	0.46271	0.151005	0.222672
Q9UMY4	SNX12	29934	Sorting nexin-12 [OS=Homo sapiens]	conjugation;metabolic process	51475.5	29825.9	53187.1	27899.7	31185.8	57116.9	50898.5	60526.7	38532.9	44829.5	38734.1	49986	1.15736	1.29049	-1.11503	0.618155	0.656579	0.656579	0.656579
Q8WVJ2	NUDCD2	134492	NudC domain-containing protein 2 [OS=Homo sapiens]	metabolic process	265605	160078	178878	221011	278614	261158	326012	298899	228132	201520	253594	284348	-1.25841	1.12127	-1.41101	0.172203	0.33394	0.452423	0.221126
Q8WUY1	THEM6	51337	Protein THEM6 [OS=Homo sapiens]		97212.9	13293.9	112824	122431	34877.4	91564.5	87328.3	78327.1	78742.6	74443.5	82957.5	81466	-1.11437	-1.01831	-1.09433	0.9627	0.965284	0.965284	0.965284
Q14997	PSME4	23198	Proteasome activator complex subunit 4 [OS=Homo sapiens]	cell growth;cell organization and biogenesis;cell proliferation;cellular homeostasis;coagulation;metabolic process	38086.9	40150.9	43475.4	22244.9	12507	9347.29	41884.4	38448.9	31822.7	40571.1	14699.7	37385.3	2.75998	2.54326	1.08521	0.0015819	0.00244193	0.00244193	0.475177
P50583	NUDT2	318	Bis(5'-nucleosyl)-tetraphosphatase [asymmetrical] [OS=Homo sapiens]	cellular homeostasis;coagulation;metabolic process	15947.8	12525.9	20018.6	9327.69	26361.8	25955.7	25731.6	24839	15652.1	16164.1	20548.4	22074.2	-1.27124	1.07426	-1.36563	0.57555	0.691875	0.793363	0.691875
Q96LD8	SENP8	123228	Sentrin-specific protease 8 [OS=Homo sapiens]	cell organization and biogenesis;cellular homeostasis	5747.08	3672.62	4052.38	5153.15	6026.77	3660.51	6808.4	5818.34	5518.1	4490.69	4946.81	6048.28	-1.10157	1.22266	-1.34685	0.23563	0.602903	0.349869	0.330041
Q15126	PMVK	10654	Phosphomevalonate kinase [OS=Homo sapiens]	cellular homeostasis;metabolic process	11900.9	11361.3	11836.3	11235.4	17352.7	11891.4	21271.1	13629.7	11788.6	11699.5	13493.2	15563.2	-1.15331	1.15341	-1.33024	0.448911	0.552825	0.552825	0.552825
Q9Y3Y2	CHTOP	26097	Chromatin target of PRMT1 protein [OS=Homo sapiens]	cellular homeostasis;conjugation;defense response;metabolic process	120354	160397	227528	136449	12444.5	181089	120152	128157	81081.3	169426	109994	109797	1.54032	-1.0018	1.54309	0.438407	0.417851	0.99697	0.417851
Q14141	SEPTIN6	23157	Septin-6 [OS=Homo sapiens]	cell differentiation;cell growth;metabolic process	290717	292537	284099	355373	299959	266503	228876	229561	243202	289118	307278	233880	-1.06281	-1.31383	1.23618	0.0339595	0.432716	0.0435982	0.0646059
Q8WWC4	MAIP1	79568	m-AAA protease-interacting protein 1, mitochondrial [OS=Homo sapiens]	cell growth;conjugation;metabolic process	52547.2	87964.6	43855.2	29440.7	43372.6	35523.3	40730.8	33330.6	30710.6	61455.7	36112.2	34924	1.7018	-1.03402	1.7597	0.110518	0.11171	0.922773	0.11171
Q9H910	JPT2	90861	Jupiter microtubule associated homolog 2 [OS=Homo sapiens]		15761	50586.8	54009.9	35404.7	51186.8	117424	60468.5	67001	47200.9	40119.2	68005.2	58223.5	-1.69508	-1.168	-1.45126	0.517253	0.689276	0.689276	0.689276
Q9H840	GEMIN7	79760	Gem-associated protein 7 [OS=Homo sapiens]	cell growth;cellular component movement;cellular homeostasis	7015.83	6858.51	6108.39	7463.53	6027.93	11841.4	12906.3	9293.95	8752.64	6660.91	8444.3	10317.6	-1.26774	1.22185	-1.54898	0.206611	0.358903	0.358903	0.263513
Q14746	COG2	22796	Conserved oligomeric Golgi complex subunit 2 [OS=Homo sapiens]	cell growth;conjugation	10362.1	17338.7	10834.9	10201.8	11330.3	12416.1	9599.62	11470.2	14961.5	12845.2	11316.1	12010.4	1.13513	1.06136	1.06951	0.807666	0.773041	0.773041	0.773041
Q13188	STK3	6788	Serine/threonine-protein kinase 3 [OS=Homo sapiens]	cell growth;cell organization and biogenesis;cellular homeostasis;defense response;development;metabolic process	44712.3	47902.3	36670.9	34586	37377.9	26257.6	38390.5	28153.3	31675	43095.2	32740.5	32739.6	1.31626	-1.00003	1.3163	0.101962	0.0961108	0.999844	0.0961108
Q9GZT9	EGLN1	54583	Egl nine homolog 1 [OS=Homo sapiens]	cell organization and biogenesis;cellular homeostasis;coagulation;metabolic process	11931.7	14700.9	13699	17614.5	23433.2	18087.9	26065	23481.1	19901.8	13443.9	19711.9	23149.3	-1.46624	1.17438	-1.72192	0.0125407	0.0446039	0.170926	0.0138429
O75410	TACC1	6867	Transforming acidic coiled-coil-containing protein 1 [OS=Homo sapiens]	cell differentiation;cell growth;defense response;metabolic process	48331.3	66485.8	40007.5	27949	38352.1	36714.8	36684.3	49033.4	36600.2	51608.2	34338.7	40772.6	1.50292	1.18737	1.26576	0.155466	0.197126	0.434574	0.312371
O43813	LANCL1	10314	Glutathione S-transferase LANCL1 [OS=Homo sapiens]	cellular homeostasis;development;metabolic process	146011	131198	132727	179820	193172	164766	143183	186306	157036	136645	179253	162175	-1.31181	-1.1053	-1.18683	0.044036	0.0496109	0.234902	0.143818
Q07866	KLC1	3831	Kinesin light chain 1 [OS=Homo sapiens]	cell growth	38853.2	33715.6	33905.8	14643.1	16950.6	21138.1	42481.1	43273.4	30372.4	35491.5	17577.2	38709	2.01917	2.20222	-1.09065	0.00375927	0.00621595	0.00550283	0.450694
Q86WB0	ZC3HC1	51530	Nuclear-interacting partner of ALK [OS=Homo sapiens]	cell differentiation;cell organization and biogenesis;cellular homeostasis;metabolic process	28081.5	34573	28642	9461.08	4729.79	9819.26	13219.5	22599.1	19463.2	30432.2	8003.38	18427.3	3.80242	2.30244	1.65147	0.00112085	0.00109943	0.0155939	0.0127248
Q5UIP0	RIF1	55183	Telomere-associated protein RIF1 [OS=Homo sapiens]	cell differentiation;cell growth;cell proliferation;cellular homeostasis;coagulation;metabolic process	153696	172679	177738	50229.4	17127.6	48087.2	147293	158495	139778	168038	38481.4	148522	4.36673	3.85959	1.1314	5.88869e-05	8.66318e-05	0.000110264	0.139897
Q96AB3	ISOC2	79763	Isochorismatase domain-containing protein 2 [OS=Homo sapiens]	metabolic process	49670.8	29032.7	37311.2	55523.7	63012.7	79155.2	35372.7	52082.3	32436	38671.6	65897.2	39963.7	-1.70402	-1.64893	-1.03341	0.0396113	0.0423351	0.0423351	0.89077
O43402	EMC8	10328	ER membrane protein complex subunit 8 [OS=Homo sapiens]	cell growth	337401	395850	350981	53583.2	35454.2	40769.7	357745	42467.5	45092.8	361411	43269	148435	8.35264	3.43052	2.4348	0.0271747	0.0314973	0.271076	0.0742392
Q13409	DYNC1I2	1781	Cytoplasmic dynein 1 intermediate chain 2 [OS=Homo sapiens]	conjugation;metabolic process	438793	566564	447145	337701	305090	305436	322006	265177	331425	484168	316076	306203	1.53181	-1.03224	1.5812	0.0061783	0.0072983	0.807224	0.0072983
P52306	RAP1GDS1	5910	Rap1 GTPase-GDP dissociation stimulator 1 [OS=Homo sapiens]	cell growth;metabolic process	29963.5	37760.9	33835.4	19043.4	32966	9668.5	29659.2	34221.5	20366.2	33853.3	20559.3	28082.3	1.64662	1.36592	1.2055	0.219235	0.284331	0.422639	0.422639
Q9UM54	MYO6	4646	Unconventional myosin-VI [OS=Homo sapiens]	cell growth;coagulation;conjugation;defense response;development;metabolic process	43439.9	48055.9	73026.4	16587.2	15768.1	49778.7	24467.1	42262.3	28749.6	54840.7	27378	31826.3	2.00309	1.16248	1.72312	0.143474	0.176864	0.736433	0.176864
Q9Y5X1	SNX9	51429	Sorting nexin-9 [OS=Homo sapiens]	cell differentiation;cell growth;conjugation;metabolic process	45898.2	89606	70994.4	78065.8	34588.8	49362.3	71863.6	71850.8	82595.7	68832.9	54005.6	75436.7	1.27455	1.39683	-1.09594	0.398939	0.540229	0.540229	0.674536
Q96BR5	COA7	65260	Cytochrome c oxidase assembly factor 7 [OS=Homo sapiens]		55166.2	64334.7	38522.3	12988.3	19796.4	5622.16	35333.6	34817.8	32256.9	52674.4	12802.3	34136.1	4.11444	2.6664	1.54307	0.00394821	0.00396094	0.0349842	0.0392476
Q9HCN4	GPN1	11321	GPN-loop GTPase 1 [OS=Homo sapiens]		14877.6	26855.9	16241.9	20988.5	21081.7	21466.2	35430.3	32962.6	30261.6	19325.2	21178.8	32884.9	-1.09592	1.55273	-1.70166	0.0129369	0.597355	0.0187612	0.0187612
P31937	HIBADH	11112	3-hydroxyisobutyrate dehydrogenase, mitochondrial [OS=Homo sapiens]	cellular homeostasis	426365	443820	419554	593678	766720	494105	272703	229473	281100	429913	618168	261092	-1.43789	-2.36762	1.64659	0.00513271	0.0443644	0.00517281	0.0443644
Q14571	ITPR2	3709	Inositol 1,4,5-trisphosphate receptor type 2 [OS=Homo sapiens]	coagulation;conjugation;development;metabolic process	111678	71580.3	96841.6	106967	66790.1	140936	115532	123143	101992	93366.7	104898	113556	-1.12351	1.08253	-1.21623	0.637867	0.688445	0.688445	0.688445
O75306	NDUFS2	4720	NADH dehydrogenase [ubiquinone] iron-sulfur protein 2, mitochondrial [OS=Homo sapiens]	cell differentiation;cell growth;cellular homeostasis;coagulation;conjugation;defense response;metabolic process	243370	130026	264536	184058	47036.6	139200	154474	171747	132138	212644	123432	152787	1.72276	1.23782	1.39177	0.248634	0.343105	0.565766	0.392518
Q7L099	RUFY3	22902	Protein RUFY3 [OS=Homo sapiens]	cell growth;defense response;metabolic process	22360	23818.7	20766.6	19078	19224.7	16774.7	20750.5	20522.2	20765.1	22315.1	18359.1	20679.3	1.21548	1.12637	1.0791	0.0182567	0.0195757	0.0809258	0.142808
Q12965	MYO1E	4643	Unconventional myosin-Ie [OS=Homo sapiens]	cell growth;cellular homeostasis;conjugation;defense response;development;metabolic process	103459	28116.5	29869.6	30016.7	34126.4	52730.1	36010.8	118882	54662.4	53815.2	38957.7	69851.9	1.38137	1.79302	-1.298	0.602	0.63116	0.63116	0.63116
Q15042	RAB3GAP1	22930	Rab3 GTPase-activating protein catalytic subunit [OS=Homo sapiens]	cell death;cell growth;defense response;development;metabolic process	179481	161791	160639	123824	112315	91754.3	154917	132510	142953	167304	109297	143460	1.53072	1.31257	1.1662	0.00443116	0.00455968	0.0266263	0.0646081
P78346	RPP30	10556	Ribonuclease P protein subunit p30 [OS=Homo sapiens]	cellular component movement;cellular homeostasis	47705.2	43698	48026.5	33086.6	23850.7	49607.3	43007.9	55182.2	44150.7	46476.6	35514.9	47446.9	1.30865	1.33597	-1.02088	0.246299	0.253569	0.253569	0.894471
Q14657	LAGE3	8270	EKC/KEOPS complex subunit LAGE3 [OS=Homo sapiens]	cellular component movement;cellular homeostasis;metabolic process	15701.6	11968.4	11236.2	12250.3	23570.5	20647.5	13231.3	17564.6	15366.4	12968.7	18822.8	15387.4	-1.4514	-1.22326	-1.1865	0.254801	0.340448	0.473184	0.473184
P07311	ACYP1	97	Acylphosphatase-1 [OS=Homo sapiens]	cellular homeostasis	55396.9	52386.3	59776.6	66974.5	97263.6	96003.3	120012	101873	102745	55853.3	86747.1	108210	-1.55312	1.24742	-1.93739	0.00453151	0.0269206	0.0660886	0.00466842
P53384	NUBP1	4682	Cytosolic Fe-S cluster assembly factor NUBP1 [OS=Homo sapiens]	cell growth;cellular homeostasis;metabolic process	93309.5	115298	112951	56628.7	65846.7	62872.8	72258.4	79425.8	90986	107186	61782.8	80890.1	1.73489	1.30927	1.32508	0.00284056	0.00288003	0.0448446	0.0197593
Q9C0C9	UBE2O	63893	(E3-independent) E2 ubiquitin-conjugating enzyme [OS=Homo sapiens]	cell organization and biogenesis;cellular homeostasis;conjugation;metabolic process	104195	150296	104392	105344	104985	107950	135708	123069	111223	119627	106093	123333	1.12757	1.1625	-1.03098	0.468041	0.547276	0.547276	0.797388
Q9Y2H0	DLGAP4	22839	Disks large-associated protein 4 [OS=Homo sapiens]	metabolic process	25705.5	20845.3	22850	26507.3	37885	36884.9	25250.6	25773.6	27534.9	23133.6	33759.1	26186.3	-1.45931	-1.28919	-1.13196	0.0407212	0.0501735	0.0866496	0.381754
P13861	PRKAR2A	5576	cAMP-dependent protein kinase type II-alpha regulatory subunit [OS=Homo sapiens]	development;metabolic process	629608	323344	616248	560423	402201	418814	448921	599010	490740	523066	460479	512891	1.13592	1.11382	1.01984	0.798815	0.919842	0.919842	0.92096
P82663	MRPS25	64432	28S ribosomal protein S25, mitochondrial [OS=Homo sapiens]		97567	75568.3	84773	67129.9	57863.6	45753.1	77668.5	62120.7	64950.9	85969.4	56915.5	68246.7	1.51047	1.19909	1.25969	0.033393	0.0372895	0.218238	0.112541
P38432	COIL	8161	Coilin [OS=Homo sapiens]	cell growth;cellular component movement;cellular homeostasis	12019.7	13791.1	10506.6	14238	3411.46	12453	25147.5	23545.5	22212.5	12105.8	10034.1	23635.2	1.20646	2.35548	-1.95238	0.00720018	0.505636	0.0105473	0.0114509
Q9Y2G5	POFUT2	23275	GDP-fucose protein O-fucosyltransferase 2 [OS=Homo sapiens]	cell organization and biogenesis;cellular homeostasis;defense response;metabolic process	13135.8	10463.2	11103	15922.2	21015.7	17211.4	8138.62	8656.67	6990.27	11567.3	18049.8	7928.52	-1.56041	-2.27656	1.45895	0.00131002	0.00672045	0.00137557	0.0478064
Q8NB49	ATP11C	286410	Phospholipid-transporting ATPase IG [OS=Homo sapiens]	cell growth;conjugation	35292	37151.4	38325.6	28184.6	16195	13209	15968.6	15686.1	13081.4	36923	19196.2	14912	1.92345	-1.2873	2.47605	0.00287229	0.00571326	0.311664	0.00386772
Q8NEZ5	FBXO22	26263	F-box only protein 22 [OS=Homo sapiens]	cell organization and biogenesis;cellular homeostasis;metabolic process	604582	534015	357744	478060	555273	450731	623586	661822	557770	498781	494688	614392	1.00827	1.24198	-1.23179	0.229438	0.955096	0.222507	0.222507
O00469	PLOD2	5352	Procollagen-lysine,2-oxoglutarate 5-dioxygenase 2 [OS=Homo sapiens]	cell organization and biogenesis;cellular homeostasis;coagulation	56275.3	71646.5	56400.1	111819	142283	128606	61418.9	69553.9	31191.9	61440.6	127569	54054.9	-2.0763	-2.35999	1.13663	0.0020814	0.00293683	0.00293683	0.580444
Q96QR8	PURB	5814	Transcriptional activator protein Pur-beta [OS=Homo sapiens]	cell differentiation;metabolic process	15860.2	13490.2	14841.5	36721.4	7785.73	13133.8	17399.1	15582.2	16483.3	14730.6	19213.6	16488.2	-1.30433	-1.1653	-1.11931	0.83025	0.817558	0.817558	0.817558
Q9UBU8	MORF4L1	10933	Mortality factor 4-like protein 1 [OS=Homo sapiens]	cell growth;cell organization and biogenesis;cell proliferation;cellular homeostasis;coagulation;metabolic process	9939.66	5874.97	7885.74	5521.57	2754.56	8356.51	9798.36	10598.6	11865.5	7900.12	5544.21	10754.2	1.42493	1.93971	-1.36126	0.0593826	0.216001	0.0668565	0.216001
Q9UG63	ABCF2	10061; 114483834	ATP-binding cassette sub-family F member 2 [OS=Homo sapiens]	conjugation	111581	66269.2	159931	13575.3	39922.3	59788.6	126339	116891	96488.6	112594	37762.1	113239	2.98166	2.99876	-1.00574	0.040763	0.0401699	0.0401699	0.98074
P04080	CSTB	1476	Cystatin-B [OS=Homo sapiens]	metabolic process	1.65164e+06	1.16684e+06	1.58563e+06	3.22068e+06	4.59805e+06	5.74323e+06	2.87612e+06	2.50261e+06	2.3043e+06	1.46804e+06	4.52065e+06	2.56101e+06	-3.07939	-1.76518	-1.74451	0.00752127	0.00815854	0.0299659	0.130097
P50748	KNTC1	9735	Kinetochore-associated protein 1 [OS=Homo sapiens]	cell differentiation;cell growth;development;metabolic process	21464.6	11770.3	24102	3026.89	12709.7	14748.7	17053.3	6829.37	16673.5	19112.3	10161.8	13518.7	1.88081	1.33035	1.41377	0.277342	0.381019	0.531306	0.46629
Q3MHD2	LSM12	124801	Protein LSM12 homolog [OS=Homo sapiens]		87268.7	82415.8	32130.7	15075.9	18402.9	18975.1	127710	118378	23779.7	67271.7	17484.6	89955.8	3.84748	5.14485	-1.3372	0.130458	0.234075	0.168806	0.487932
Q13158	FADD	8772	FAS-associated death domain protein [OS=Homo sapiens]	cell growth;cell organization and biogenesis;cellular homeostasis;coagulation;defense response;development;metabolic process	11005.3	8557.26	11848.6	8889.56	9842.89	10346.6	14812.1	15021	11511.7	10470.4	9693.03	13781.6	1.0802	1.4218	-1.31624	0.0399485	0.565206	0.0557938	0.0616805
O95983	MBD3	53615	Methyl-CpG-binding domain protein 3 [OS=Homo sapiens]	cell growth;cell organization and biogenesis;cellular homeostasis;defense response;metabolic process	19972.2	24892.6	26381.1	16807.7	13985.8	21557.6	26291.7	27315.4	21925.1	23748.6	17450.4	25177.4	1.36093	1.4428	-1.06016	0.0649636	0.093122	0.0925737	0.622271
Q9H2M9	RAB3GAP2	25782	Rab3 GTPase-activating protein non-catalytic subunit [OS=Homo sapiens]	conjugation;metabolic process	108775	114973	112441	71945.7	68627.7	71079.5	89570.5	107769	92024.9	112063	70551	96454.9	1.5884	1.36717	1.16182	0.000458387	0.00046862	0.00292222	0.0197116
P82933	MRPS9	64965	28S ribosomal protein S9, mitochondrial [OS=Homo sapiens]	cell organization and biogenesis;cellular homeostasis	22540.8	34570	26602	17691.1	58431.2	14052.5	62175.1	16063.4	19100	27904.3	30058.3	32446.2	-1.07719	1.07944	-1.16277	0.965352	0.903652	0.903652	0.903652
Q8WVD5	RNF141	50862	RING finger protein 141 [OS=Homo sapiens]	cell organization and biogenesis;cellular homeostasis;metabolic process	48098.8	47533	49213.8	72617	65060.1	74293.9	29268.4	29224.3	22848.8	48281.9	70657	27113.8	-1.46343	-2.60594	1.78071	1.84038e-05	0.0003551	1.74402e-05	0.0003551
Q9NP92	MRPS30	10884	39S ribosomal protein S30, mitochondrial [OS=Homo sapiens]	cell organization and biogenesis;cellular homeostasis;metabolic process	56698	69673.2	69956.6	37499.9	13728.3	17137.1	54743.9	41553.3	33398.7	65442.6	22788.4	43232	2.87175	1.8971	1.51376	0.00784804	0.00799314	0.0565361	0.0565361
O00471	EXOC5	10640	Exocyst complex component 5 [OS=Homo sapiens]	cell growth;conjugation;metabolic process	330827	31715.5	162321	1.25292e+06	1.24348e+06	1.91381e+06	1.85752e+06	2.00773e+06	2.362e+06	174954	1.47007e+06	2.07575e+06	-8.40258	1.41201	-11.8645	0.000463592	0.00199659	0.0386622	0.000504871
Q16204	CCDC6	8030	Coiled-coil domain-containing protein 6 [OS=Homo sapiens]	cell growth	79909.5	88892.1	54524	43653.1	72619	51066.8	46129.9	83560	92111.6	74441.8	55779.6	73933.8	1.33457	1.32546	1.00687	0.458498	0.446905	0.446905	0.975595
Q96PV6	LENG8	114823	Leukocyte receptor cluster member 8 [OS=Homo sapiens]		12035.6	10642.9	10915.2	8209.83	3862.84	6348.21	7111.39	7443.19	9099.43	11197.9	6140.3	7884.67	1.82368	1.28409	1.42021	0.0147604	0.0165152	0.194942	0.048599
Q8IWS0	PHF6	84295	PHD finger protein 6 [OS=Homo sapiens]	defense response;metabolic process	13275.9	36838.1	23041.4	9052.69	9601.97	6963.87	15311.6	12041.6	15789.1	24385.1	8539.51	14380.8	2.85557	1.68403	1.69568	0.0803662	0.0960498	0.345058	0.194711
P12931	SRC	6714	Proto-oncogene tyrosine-protein kinase Src [OS=Homo sapiens]	cell communication;cell differentiation;cell growth;cell organization and biogenesis;cellular homeostasis;coagulation;conjugation;defense response;development;metabolic process	32606.3	30286.4	30216.5	29619.5	26272.5	28581.3	26934.3	26318.7	24498.1	31036.4	28157.7	25917	1.10223	-1.08646	1.19753	0.0145919	0.0782373	0.109087	0.0153408
Q7Z7H8	MRPL10	124995	39S ribosomal protein L10, mitochondrial [OS=Homo sapiens]	cell organization and biogenesis;cellular homeostasis	12528.1	9021.77	12470.9	6115.28	5278.21	4413.86	5820.41	8416.61	4781.75	11340.3	5269.12	6339.59	2.15221	1.20316	1.7888	0.0089657	0.0125671	0.459573	0.0153004
Q9BRX2	PELO	53918	Protein pelota homolog [OS=Homo sapiens]	cell differentiation;cell growth;cellular component movement;cellular homeostasis;defense response;metabolic process	33042.3	36914.6	26054.9	21340.4	19257.3	20011.6	41678.2	33786.1	31900.9	32003.9	20203.1	35788.4	1.58411	1.77143	-1.11825	0.011741	0.0252881	0.0147921	0.33359
P82675	MRPS5	64969	28S ribosomal protein S5, mitochondrial [OS=Homo sapiens]	cell organization and biogenesis;cellular homeostasis	36124.7	29124.1	47862.1	27260	17171.7	14236.8	28816.8	20144.9	27954.4	37703.6	19556.2	25638.7	1.92797	1.31103	1.47058	0.0563512	0.0673905	0.345841	0.13321
O75940	SMNDC1	10285	Survival of motor neuron-related-splicing factor 30 [OS=Homo sapiens]	cellular component movement;cellular homeostasis;metabolic process	126336	194098	135185	104295	108440	25462.5	193320	145894	109507	151873	79399.1	149574	1.91278	1.88382	1.01537	0.133032	0.130622	0.130622	0.948812
O75962	TRIO	7204	Triple functional domain protein [OS=Homo sapiens]	cell growth;cell organization and biogenesis;cellular homeostasis;defense response;development;metabolic process	29095.5	26471.9	29573.9	17020.8	16363.9	11212.8	29686.9	28359.2	26456.7	28380.4	14865.8	28167.6	1.90911	1.89479	1.00756	0.000503503	0.000562783	0.000562783	0.912568
Q9Y3Z3	SAMHD1	25939	Deoxynucleoside triphosphate triphosphohydrolase SAMHD1 [OS=Homo sapiens]	cell growth;cell proliferation;cellular component movement;cellular homeostasis;coagulation;defense response;metabolic process	73402.9	95890.9	96522.6	81311	55648.9	57656.6	94970.5	97569.4	90406.1	88605.4	64872.1	94315.3	1.36585	1.45387	-1.06444	0.0421231	0.0653702	0.0585759	0.562296
P53804	TTC3	7267	E3 ubiquitin-protein ligase TTC3 [OS=Homo sapiens]	cell organization and biogenesis;cellular homeostasis	147403	63974.4	95663.9	844818	2.35413e+06	1.01775e+06	1.003e+06	536437	1.61803e+06	102347	1.40556e+06	1.05249e+06	-13.7333	-1.33547	-10.2835	0.0729719	0.0941189	0.477591	0.131583
Q15836	VAMP3	9341	Vesicle-associated membrane protein 3 [OS=Homo sapiens]	cell communication;cell growth;coagulation;conjugation;metabolic process	60849.1	105438	117488	405568	223258	328083	262017	221492	200601	94591.8	318969	228037	-3.37206	-1.39876	-2.41075	0.00943377	0.00993339	0.105215	0.0468783
P29350	PTPN6	5777	Tyrosine-protein phosphatase non-receptor type 6 [OS=Homo sapiens]	cell communication;cell differentiation;cell organization and biogenesis;cellular homeostasis;coagulation;defense response;development;metabolic process	9680.85	6208.78	7677.37	9692.93	7312.12	9402.93	6086.43	8369.64	9506.06	7855.66	8802.66	7987.38	-1.12055	-1.10207	-1.01677	0.747729	0.836225	0.836225	0.923365
Q9NXR7	BABAM2	9577	BRISC and BRCA1-A complex member 2 [OS=Homo sapiens]	cell differentiation;cell growth;cell organization and biogenesis;cell proliferation;cellular homeostasis;coagulation;development;metabolic process	8215.22	33514.8	20453.8	26558.5	19422.1	23521.7	5875.04	21742.6	28488.6	20727.9	23167.4	18702.1	-1.11769	-1.23876	1.10832	0.866947	0.81462	0.81462	0.81462
P11137	MAP2	4133	Microtubule-associated protein 2 [OS=Homo sapiens]	cell growth;defense response;metabolic process	104091	101897	82844	135869	170535	118453	54095	50887.8	48640.4	96277.4	141619	51207.7	-1.47095	-2.76558	1.88013	0.00178853	0.0167152	0.00175916	0.0167152
P21964	COMT	1312	Catechol O-methyltransferase [OS=Homo sapiens]	cellular homeostasis;coagulation;metabolic process	8495.92	11491.7	7750.79	8855.9	13415.1	3916.38	6352.07	6302.36	6988.1	9246.15	8729.11	6547.51	1.05923	-1.3332	1.41216	0.535981	0.838738	0.60662	0.60662
Q9H307	PNN	5411	Pinin [OS=Homo sapiens]	cell communication;cellular component movement;cellular homeostasis	92713.6	272509	152363	209000	18475	182056	217061	167465	178549	172528	136510	187692	1.26385	1.37493	-1.08789	0.74061	0.826323	0.826323	0.826323
Q96RE7	NACC1	112939	Nucleus accumbens-associated protein 1 [OS=Homo sapiens]	metabolic process	98262.3	98139.6	94419.3	125078	94000	102811	108282	108317	91092.1	96940.4	107296	102563	-1.10683	-1.04615	-1.05801	0.54537	0.615704	0.615704	0.615704
Q5JTY5	CBWD3	220869; 445571	COBW domain-containing protein 3 [OS=Homo sapiens]		52875.2	38445.1	34749.5	25385.8	42546.9	24547.7	40318.4	16830.5	32463.7	42023.3	30826.8	29870.8	1.36321	-1.032	1.40683	0.360256	0.36578	0.915753	0.36578
P54252	ATXN3	4287	Ataxin-3 [OS=Homo sapiens]	cell death;cell growth;cell organization and biogenesis;cell proliferation;cellular homeostasis;coagulation;defense response;metabolic process	20996.2	28150.2	25385.9	22735.1	43605.4	22697.2	23598.2	28842.2	29002.5	24844.1	29679.2	27147.6	-1.19462	-1.09325	-1.09272	0.742185	0.719085	0.719085	0.719085
Q8NHP6	MOSPD2	158747	Motile sperm domain-containing protein 2 [OS=Homo sapiens]	metabolic process	22011.8	5241.67	18518.5	3513.44	14328.5	12836.3	16013.4	18796.7	11703.7	15257.3	10226.1	15504.6	1.492	1.51618	-1.01621	0.561335	0.566048	0.566048	0.964165
P16144	ITGB4	3691	Integrin beta-4 [OS=Homo sapiens]	cell communication;cell growth;cellular homeostasis;coagulation;defense response;development;metabolic process	2.08557e+06	1.83105e+06	1.72832e+06	957945	656633	802682	692854	663719	541879	1.88165e+06	805754	632817	2.33526	-1.27328	2.97344	8.41474e-05	0.00014866	0.194005	0.000127319
Q13636	RAB31	11031	Ras-related protein Rab-31 [OS=Homo sapiens]	cell growth;cellular homeostasis;conjugation;metabolic process	11743.9	13796.2	9831.56	12722.6	7874.88	7755.49	9756.37	9293.94	11229.4	11790.5	9450.98	10093.2	1.24755	1.06796	1.16816	0.417838	0.534383	0.718372	0.534383
Q96IJ6	GMPPA	29926	Mannose-1-phosphate guanyltransferase alpha [OS=Homo sapiens]	cellular homeostasis	50237.8	36713.6	53255.8	28183.4	47793.1	42021.7	68368.6	64945.5	67223.4	46735.8	39332.7	66845.9	1.18822	1.6995	-1.43029	0.0122545	0.288828	0.014886	0.0293328
P05166	PCCB	5096	Propionyl-CoA carboxylase beta chain, mitochondrial [OS=Homo sapiens]	cellular homeostasis	50152.6	42660.5	47121.6	46071.3	48536.1	43376.5	29480.3	16347.4	27942.6	46644.9	45994.7	24590.1	1.01414	-1.87045	1.8969	0.00234665	0.876551	0.00265219	0.00265219
Q9UPN7	PPP6R1	22870	Serine/threonine-protein phosphatase 6 regulatory subunit 1 [OS=Homo sapiens]	metabolic process	43713.9	57845.9	43580.5	38145.8	36690.3	15404.8	43401.5	53179	43878	48380.1	30080.3	46819.5	1.60837	1.55648	1.03333	0.0953205	0.104624	0.104624	0.844015
Q14558	PRPSAP1	5635	Phosphoribosyl pyrophosphate synthase-associated protein 1 [OS=Homo sapiens]	cellular homeostasis;metabolic process	36285.6	35298.2	38660.7	28279.3	30099.5	28910.4	19000.5	35666.8	25150.6	36748.2	29096.4	26605.9	1.26298	-1.09361	1.3812	0.105046	0.164664	0.563888	0.142165
Q9BW27	NUP85	79902	Nuclear pore complex protein Nup85 [OS=Homo sapiens]	cell growth;cellular homeostasis;conjugation;defense response;metabolic process	32924	85307.7	66909.8	49073.9	9893.3	47960.7	80832.3	56561.6	42997.3	61713.8	35642.6	60130.4	1.73146	1.68704	1.02633	0.358325	0.35694	0.35694	0.935227
Q13480	GAB1	2549	GRB2-associated-binding protein 1 [OS=Homo sapiens]	cell growth;defense response;development;metabolic process	35999.8	42336.7	38812.2	38900	46605.8	28983.9	43535.2	41677.8	44684.2	39049.6	38163.2	43299	1.02323	1.13458	-1.10882	0.511938	0.849784	0.569604	0.569604
Q9Y5K8	ATP6V1D	51382	V-type proton ATPase subunit D [OS=Homo sapiens]	cell growth;conjugation;metabolic process	83370.8	82218.6	89218.6	78630.8	76190.9	90658.2	73094.7	82635	64187.2	84936	81826.6	73305.6	1.038	-1.11624	1.15866	0.209666	0.61986	0.302897	0.294944
Q9BQ95	ECSIT	51295	Evolutionarily conserved signaling intermediate in Toll pathway, mitochondrial [OS=Homo sapiens]	coagulation;metabolic process	4543.08	4199.26	4352.06	3630.05	2136.52	3874.93	4441.65	2527.8	3593.1	4364.8	3213.83	3520.85	1.35813	1.09553	1.2397	0.253145	0.351635	0.647673	0.351635
Q9H008	LHPP	64077	Phospholysine phosphohistidine inorganic pyrophosphate phosphatase [OS=Homo sapiens]	cell organization and biogenesis;cellular homeostasis	8384.64	10960.9	7888.64	14679.9	17135.9	11092.7	12220.4	10274.3	11496.9	9078.07	14302.8	11330.5	-1.57553	-1.26233	-1.24812	0.0572851	0.0647462	0.194997	0.232123
Q9UJW0	DCTN4	51164	Dynactin subunit 4 [OS=Homo sapiens]		165164	192200	177417	121975	182569	98701.5	140965	172499	188913	178260	134415	167459	1.32619	1.24583	1.0645	0.248588	0.333496	0.333496	0.671934
O00443	PIK3C2A	5286	Phosphatidylinositol 4-phosphate 3-kinase C2 domain-containing subunit alpha [OS=Homo sapiens]	cell growth;cellular homeostasis;conjugation;development;metabolic process	12826.5	8046.46	11355.9	5553.15	3197.91	7330.46	6984.68	9177.47	9343.41	10743	5360.51	8501.86	2.00409	1.58602	1.2636	0.0444106	0.049674	0.154532	0.219448
Q9HCS7	XAB2	56949	Pre-mRNA-splicing factor SYF1 [OS=Homo sapiens]	cell growth;cell proliferation;cellular component movement;cellular homeostasis;coagulation;defense response	61223.8	126739	137173	32596.1	3737.23	28950.9	114492	139888	55580.8	108379	21761.4	103320	4.98032	4.74787	1.04896	0.0427592	0.046619	0.046619	0.867746
O75934	BCAS2	10286	Pre-mRNA-splicing factor SPF27 [OS=Homo sapiens]	cellular component movement;cellular homeostasis	23633.3	38324.9	34201.2	29284.2	25304.4	36301.8	48458.9	37900.8	25490	32053.1	30296.8	37283.2	1.05797	1.2306	-1.16317	0.609223	0.810304	0.724962	0.724962
P18887	XRCC1	7515	DNA repair protein XRCC1 [OS=Homo sapiens]	cell growth;cell proliferation;cellular homeostasis;coagulation;defense response;metabolic process	68842	85814.4	73609.3	33959.1	15303.9	24463.7	65838	52197.7	36557.6	76088.5	24575.6	51531.1	3.09611	2.09684	1.47656	0.00406747	0.00407372	0.0366166	0.0366166
Q9NR50	EIF2B3	8891	Translation initiation factor eIF-2B subunit gamma [OS=Homo sapiens]	cell organization and biogenesis;cellular homeostasis;coagulation;defense response;development;metabolic process	51678.6	51261.5	45465	34162	24408.9	31787.8	47997.9	55811.7	52110.1	49468.4	30119.6	51973.2	1.6424	1.72556	-1.05064	0.00134259	0.00202082	0.00202082	0.493776
Q14435	GALNT3	2591	Polypeptide N-acetylgalactosaminyltransferase 3 [OS=Homo sapiens]	cell organization and biogenesis;cellular homeostasis;development	62225.4	54450.7	56006.2	29029.2	119634	24153.6	21985.6	41203.6	30769.1	57560.8	57605.7	31319.4	-1.00078	-1.8393	1.83786	0.537586	0.998667	0.523161	0.523161
Q9H0A0	NAT10	55226	RNA cytidine acetyltransferase [OS=Homo sapiens]	cell organization and biogenesis;cellular component movement;cellular homeostasis;metabolic process	28528.2	69630	44889.6	68120.2	24659.9	55651.5	96921	86147.6	77153.6	47682.6	49477.2	86740.7	-1.03764	1.75314	-1.81913	0.0705233	0.909313	0.0730109	0.0730109
Q9NYY8	FASTKD2	22868	FAST kinase domain-containing protein 2, mitochondrial [OS=Homo sapiens]	cell growth;cell organization and biogenesis;cellular component movement;cellular homeostasis;metabolic process	27864.9	34864.2	31445.5	7909.41	8833.53	10977.5	25224	14929.5	20220.4	31391.6	9240.15	20124.6	3.3973	2.17795	1.55986	0.00102219	0.000997127	0.0114217	0.0114217
Q96HS1	PGAM5	192111	Serine/threonine-protein phosphatase PGAM5, mitochondrial [OS=Homo sapiens]	cell organization and biogenesis;cellular homeostasis;metabolic process	275075	247327	281764	188441	129385	151576	169838	162235	184017	268055	156467	172030	1.71317	1.09946	1.55819	0.00130804	0.00196803	0.402794	0.00216255
O95049	TJP3	27134	Tight junction protein ZO-3 [OS=Homo sapiens]	cell communication;cell growth;metabolic process	17444.7	17668.9	15315.7	17392	10571.9	23527.4	15190.5	12722.9	11867.5	16809.8	17163.8	13260.3	-1.02106	-1.29437	1.26767	0.455591	0.916046	0.468897	0.468897
Q5T1C6	THEM4	117145	Acyl-coenzyme A thioesterase THEM4 [OS=Homo sapiens]	cell growth;cellular homeostasis;conjugation;development	49905.2	40692	38603.6	18756.7	23337.5	17529.4	26247.7	29835.6	19654.1	43066.9	19874.5	25245.8	2.16694	1.27026	1.7059	0.00276585	0.00348554	0.228474	0.00650038
Q71UM5	RPS27L	51065	40S ribosomal protein S27-like [OS=Homo sapiens]	cell differentiation;cell growth;cell organization and biogenesis;cellular homeostasis;coagulation;development;metabolic process	278763	530580	315061	424270	508570	311535	452093	338110	412838	374802	414792	401013	-1.1067	-1.03436	-1.06994	0.891281	0.874907	0.874907	0.874907
Q96HY7	DHTKD1	55526	Probable 2-oxoglutarate dehydrogenase E1 component DHKTD1, mitochondrial [OS=Homo sapiens]	cellular homeostasis;defense response	196338	225770	178848	130742	135265	119951	130035	123997	132091	200319	128653	128707	1.55705	1.00042	1.55639	0.00137401	0.00145206	0.9965	0.00145206
Q8IZ83	ALDH16A1	126133	Aldehyde dehydrogenase family 16 member A1 [OS=Homo sapiens]		237500	367362	350746	364907	228497	359773	421232	419374	390425	318536	317726	410344	1.00255	1.2915	-1.28822	0.185157	0.987603	0.174398	0.174398
Q7Z3U7	MON2	23041	Protein MON2 homolog [OS=Homo sapiens]	conjugation	266271	178471	207430	112950	95990.1	65152.7	184822	200081	228141	217390	91364.4	204348	2.37938	2.23663	1.06382	0.00542541	0.00743731	0.00743731	0.635404
O60264	SMARCA5	8467	SWI/SNF-related matrix-associated actin-dependent regulator of chromatin subfamily A member 5 [OS=Homo sapiens]	cell growth;cellular component movement;cellular homeostasis;metabolic process	457560	593024	490959	391768	154981	318554	579236	562090	590858	513848	288434	577395	1.78151	2.00182	-1.12367	0.0111345	0.0219928	0.0145205	0.376038
A3KMH1	VWA8	23078	von Willebrand factor A domain-containing protein 8 [OS=Homo sapiens]		40363.5	38348.1	32605.9	13774.4	4015.27	4640.19	20359.2	13232.4	17256.2	37105.8	7476.62	16949.3	4.96291	2.26697	2.18923	0.00049052	0.000533692	0.0395762	0.00211876
Q9H3Z4	DNAJC5	80331	DnaJ homolog subfamily C member 5 [OS=Homo sapiens]	cell death;conjugation;metabolic process	18017.1	16351.2	10167.5	18769.6	17782.5	13829.1	15484.5	13132.8	14662.2	14845.3	16793.8	14426.5	-1.13125	-1.16409	1.02903	0.595272	0.664785	0.664785	0.865798
P18031	PTPN1	5770	Tyrosine-protein phosphatase non-receptor type 1 [OS=Homo sapiens]	cell growth;cell organization and biogenesis;cellular homeostasis;coagulation;development;metabolic process	434657	373659	420837	264622	219815	229811	289260	214860	250690	409718	238082	251604	1.72091	1.05679	1.62843	0.000934583	0.00125497	0.617009	0.00125497
Q6XQN6	NAPRT	93100	Nicotinate phosphoribosyltransferase [OS=Homo sapiens]	cellular homeostasis;coagulation	141092	146997	127333	110599	279946	106851	147810	156309	147883	138474	165799	150667	-1.19733	-1.10043	-1.08806	0.847331	0.803595	0.803595	0.803595
P04183	TK1	7083	Thymidine kinase, cytosolic [OS=Homo sapiens]	cell growth;cell proliferation;cellular homeostasis	20488.1	16000.2	21736.7	8052.89	11403.7	10876.6	40566.7	31606.9	27704.4	19408.3	10111.1	33292.6	1.91952	3.2927	-1.71538	0.00174127	0.038575	0.00177246	0.0114172
Q6P1X6	C8orf82	414919	UPF0598 protein C8orf82 [OS=Homo sapiens]		12190.3	9043.25	13245.1	6000.79	12323.5	6041.6	10944	13209.1	6505.62	11492.9	8121.96	10219.6	1.41504	1.25827	1.12459	0.462391	0.637487	0.637487	0.637487
P02765	AHSG	197	Alpha-2-HS-glycoprotein [OS=Homo sapiens]	coagulation;conjugation;defense response;metabolic process	3.16238e+06	2.22252e+06	1.864e+06	1.27572e+07	5.68213e+07	2.05987e+07	3.31897e+07	2.03468e+07	3.05537e+07	2.4163e+06	3.00591e+07	2.80301e+07	-12.4401	-1.07239	-11.6004	0.0953486	0.102286	0.866185	0.102286
Q5T160	RARS2	57038	Probable arginine--tRNA ligase, mitochondrial [OS=Homo sapiens]	cell organization and biogenesis;cellular component movement;cellular homeostasis	23118.8	16945.6	18178.5	8246.2	11085.5	4732.7	10416.3	9714.72	12681.5	19414.3	8021.47	10937.5	2.42029	1.36353	1.77502	0.00591832	0.00723277	0.246443	0.0145538
Q9UPU5	USP24	23358	Ubiquitin carboxyl-terminal hydrolase 24 [OS=Homo sapiens]	cell organization and biogenesis;cellular homeostasis	9964.33	10058.6	14940.2	11408.5	11622.9	2863.39	8130.9	11761.6	12484.4	11654.4	8631.6	10792.3	1.3502	1.25032	1.07988	0.595055	0.732021	0.732021	0.778152
O95292	VAPB	9217	Vesicle-associated membrane protein-associated protein B/C [OS=Homo sapiens]	cell growth;coagulation;conjugation;development;metabolic process	516155	483965	475159	571297	454363	452572	374851	505729	345015	491759	492744	408532	-1.002	-1.20613	1.20372	0.260794	0.985646	0.245977	0.245977
Q96BW5	PTER	9317	Phosphotriesterase-related protein [OS=Homo sapiens]	cellular homeostasis;metabolic process	29819.4	54108.3	47132.2	20545	59468.8	21021.1	56964	67041.7	51516.1	43686.6	33678.3	58507.3	1.29717	1.73724	-1.33925	0.221562	0.458151	0.29045	0.427413
Q6WKZ4	RAB11FIP1	80223	Rab11 family-interacting protein 1 [OS=Homo sapiens]	conjugation;metabolic process	544995	668318	628330	528278	619125	628210	408059	424917	432733	613881	591871	421903	1.03719	-1.40286	1.45503	0.00564081	0.601308	0.00800224	0.00800224
Q9Y5A9	YTHDF2	51441	YTH domain-containing family protein 2 [OS=Homo sapiens]	cell differentiation;cell growth;cellular component movement;cellular homeostasis;coagulation;defense response;metabolic process	302673	285146	267331	78018.3	67635.6	68068.1	242664	244844	214975	285050	71240.7	234161	4.00123	3.2869	1.21733	4.41207e-06	5.39117e-06	1.33147e-05	0.00497488
P28340	POLD1	5424	DNA polymerase delta catalytic subunit [OS=Homo sapiens]	cell proliferation;cellular homeostasis;coagulation;metabolic process	229285	199782	150503	95051.4	95655.5	48205.3	127900	162493	160517	193190	79637.4	150304	2.42587	1.88735	1.28533	0.00994894	0.0106945	0.0418956	0.130697
Q6UW68	TMEM205	374882	Transmembrane protein 205 [OS=Homo sapiens]		128196	107445	142275	243576	210540	216698	143756	154088	150683	125972	223604	149509	-1.77503	-1.49559	-1.18684	0.000444189	0.0005447	0.00122033	0.0965447
Q14244	MAP7	9053	Ensconsin [OS=Homo sapiens]	cell growth;coagulation;metabolic process	24469.9	79459.3	27588	19682.1	17978.2	28971.1	24934.6	49589.7	27469.4	43839.1	22210.5	33997.9	1.9738	1.53072	1.28946	0.455253	0.564514	0.564514	0.564514
Q8N0X7	SPART	23111	Spartin [OS=Homo sapiens]	cell growth;defense response;metabolic process	172763	227595	170877	117834	137495	95679.2	195173	166950	161588	190412	117003	174570	1.62741	1.49202	1.09075	0.0236114	0.031386	0.042223	0.458599
Q9BZE1	MRPL37	51253	39S ribosomal protein L37, mitochondrial [OS=Homo sapiens]	cell organization and biogenesis;cellular homeostasis	46979.6	88991.5	94829.4	27283.8	14548.2	23774	31963.7	30052.5	28616.5	76933.5	21868.7	30210.9	3.51797	1.38147	2.54655	0.0100628	0.0147758	0.536105	0.0155967
Q05086	UBE3A	7337	Ubiquitin-protein ligase E3A [OS=Homo sapiens]	cell organization and biogenesis;cellular homeostasis;coagulation;conjugation;defense response;development;metabolic process	79882.9	96278.5	126307	71193.9	92113.2	63562.8	125016	96133.9	133211	100823	75623.3	118120	1.33322	1.56196	-1.17156	0.09531	0.249525	0.113186	0.321203
Q7Z2T5	TRMT1L	81627	TRMT1-like protein [OS=Homo sapiens]	cellular component movement;cellular homeostasis;metabolic process	46732.8	85523.8	86860.2	36812.1	15682.9	25466.8	72248.2	75009	68187.8	73038.9	25987.3	71815	2.81057	2.76347	1.01704	0.0121022	0.0129333	0.0129333	0.921785
Q7Z4S6	KIF21A	55605	Kinesin-like protein KIF21A [OS=Homo sapiens]	metabolic process	102250	81100	88890.7	48225.3	54533.6	26701.6	124549	114467	85456.7	90746.7	43153.5	108158	2.10288	2.50635	-1.19186	0.00570958	0.0148973	0.0068529	0.223188
Q96TC7	RMDN3	55177	Regulator of microtubule dynamics protein 3 [OS=Homo sapiens]	metabolic process	115086	112642	132046	121612	49429	79836.4	88642.2	98535.5	83534	119925	83625.7	90237.2	1.43407	1.07906	1.32899	0.184678	0.229679	0.728221	0.229679
Q3LXA3	TKFC	26007	Triokinase/FMN cyclase [OS=Homo sapiens]	cellular homeostasis;metabolic process	307695	303738	313090	565804	632737	505833	336968	410354	345105	308175	568124	364142	-1.84351	-1.56017	-1.18161	0.000771422	0.000993637	0.00181262	0.165951
Q8NFH3	NUP43	348995	Nucleoporin Nup43 [OS=Homo sapiens]	cell differentiation;conjugation;metabolic process	75715	116939	81304.4	51249.5	29571.1	102317	139572	117611	121161	91319.4	61045.9	126114	1.49591	2.06589	-1.38102	0.0593491	0.204328	0.0666284	0.204328
Q96RS6	NUDCD1	84955	NudC domain-containing protein 1 [OS=Homo sapiens]	metabolic process	39112.1	28780.9	27442.5	17365	26620.6	19528	28568.3	32073.3	24417.6	31778.5	21171.2	28353.1	1.50102	1.33923	1.12081	0.105841	0.133497	0.205748	0.44463
Q96EY4	TMA16	55319	Translation machinery-associated protein 16 [OS=Homo sapiens]		17218.4	18022.3	16502.4	17275.9	16480.7	13038.1	19057.6	17513.4	20525.5	17247.7	15598.2	19032.1	1.10575	1.22015	-1.10346	0.105385	0.260142	0.123924	0.260142
Q9UHN6	CEMIP2	23670	Cell surface hyaluronidase [OS=Homo sapiens]	cellular homeostasis;defense response;metabolic process	139395	146296	105801	48791.2	36272.8	9412.68	97531.1	82825.4	82766.4	130498	31492.2	87707.6	4.1438	2.78506	1.48787	0.00146017	0.00145527	0.0123112	0.0255992
P47914	RPL29	6159	60S ribosomal protein L29 [OS=Homo sapiens]	cell organization and biogenesis;cellular homeostasis;defense response	1.13889e+06	1.0961e+06	1.37972e+06	1.06452e+06	695838	735863	1.18281e+06	1.1749e+06	1.06504e+06	1.2049e+06	832075	1.14092e+06	1.44807	1.37117	1.05608	0.0487583	0.0697233	0.0697233	0.622933
P41208	CETN2	1069	Centrin-2 [OS=Homo sapiens]	cell differentiation;cell growth;cell proliferation;cellular homeostasis;coagulation;conjugation;metabolic process	4636.06	6821.47	6318.12	8250.36	9035.22	13945.5	10706.6	10307	8315.1	5925.22	10410.4	9776.22	-1.75696	-1.06487	-1.64993	0.070869	0.0900754	0.71645	0.0900754
Q9BWM7	SFXN3	81855	Sideroflexin-3 [OS=Homo sapiens]	cellular homeostasis;conjugation	4344.73	4666.38	6032.68	97725.3	29245	65656	16124.9	16644.3	5038.79	5014.6	64208.8	12602.6	-12.8044	-5.09486	-2.51319	0.0222418	0.0302125	0.0302125	0.66085
P02768	ALB	213	Albumin [OS=Homo sapiens]	coagulation;metabolic process	2.14197e+07	8.63839e+06	1.16586e+07	1.60573e+08	4.31605e+08	1.80586e+08	2.01352e+08	1.30346e+08	287375238	1.39056e+07	2.57588e+08	2.06358e+08	-18.5241	-1.24826	-14.8399	0.0505061	0.068988	0.547202	0.0804108
Q13885	TUBB2A	7280	Tubulin beta-2A chain [OS=Homo sapiens]	cell differentiation;cell growth;defense response	3.81389e+06	3.81262e+06	4.05654e+06	3.19462e+06	3.2263e+06	2.93269e+06	4.18917e+06	4.39894e+06	4.03038e+06	3.89435e+06	3.11787e+06	4.20616e+06	1.24904	1.34905	-1.08007	0.000477186	0.00168412	0.000543581	0.0578097
Q9BXW7	HDHD5	27440	Haloacid dehalogenase-like hydrolase domain-containing 5 [OS=Homo sapiens]	cellular homeostasis	114918	256098	93648	130870	346230	282905	90953.9	92737.3	88932.5	154888	253335	90874.6	-1.6356	-2.78775	1.70442	0.124614	0.286043	0.152684	0.374592
Q9UL15	BAG5	9529	BAG family molecular chaperone regulator 5 [OS=Homo sapiens]	cell growth;metabolic process	12429.4	24296.9	9205.84	9728.2	11420.6	3954.21	17658.9	14222.9	14095.2	15310.7	8367.68	15325.6	1.82974	1.83153	-1.00098	0.251114	0.234275	0.234275	0.997331
P36404	ARL2	402	ADP-ribosylation factor-like protein 2 [OS=Homo sapiens]	cell differentiation;cell growth;metabolic process	79150.2	64788	64504.6	45787.6	60272.2	47034.4	75081.9	86392.7	71998.6	69481	51031.4	77824.4	1.36153	1.52503	-1.12008	0.0163877	0.0452681	0.0190359	0.2487
Q8WUM0	NUP133	55746	Nuclear pore complex protein Nup133 [OS=Homo sapiens]	cell growth;cellular homeostasis;conjugation;defense response	170780	214066	213375	129753	1830.94	164807	234144	232562	234364	199407	98796.9	233690	2.01835	2.36536	-1.17193	0.0432344	0.0810448	0.055496	0.446535
Q9UPT8	ZC3H4	23211	Zinc finger CCCH domain-containing protein 4 [OS=Homo sapiens]	metabolic process	16092.7	24715.4	18847.8	12933	12963.3	15004.3	12392	14452.4	15308.1	19885.3	13633.5	14050.8	1.45856	1.03061	1.41524	0.0575618	0.0628348	0.859779	0.0628348
Q6NUM9	RETSAT	54884	All-trans-retinol 13,14-reductase [OS=Homo sapiens]	cellular homeostasis	16121.5	19923.8	16066.6	16426.6	15860.1	13770.4	15900.2	13347.6	11774.8	17370.6	15352.4	13674.2	1.13146	-1.12273	1.27032	0.141494	0.328011	0.328011	0.17236
Q9UDY8	MALT1	10892	Mucosa-associated lymphoid tissue lymphoma translocation protein 1 [OS=Homo sapiens]	cell differentiation;cell organization and biogenesis;cellular homeostasis;coagulation;conjugation;defense response;development;metabolic process	10255.7	10421	8675.43	6820.62	9465.74	7349.47	11898.8	9054.93	7289.61	9784.06	7878.61	9414.44	1.24185	1.19494	1.03926	0.389558	0.451754	0.451754	0.794573
P22570	FDXR	2232	NADPH:adrenodoxin oxidoreductase, mitochondrial [OS=Homo sapiens]	cellular homeostasis	107507	37804.2	81831.2	82704.7	32978.1	62195.5	31513	76846.6	50310.9	75714.1	59292.8	52890.2	1.27695	-1.12105	1.43153	0.617589	0.753797	0.790303	0.753797
Q9Y3A3	MOB4	25843	MOB-like protein phocein [OS=Homo sapiens]		43758.5	57969.3	57057.9	41706.7	44049.5	32031.2	49432.3	54270.2	43892.2	52928.6	39262.5	49198.2	1.34807	1.25306	1.07582	0.101439	0.133227	0.172425	0.514913
O95219	SNX4	8723	Sorting nexin-4 [OS=Homo sapiens]	conjugation;metabolic process	13767.5	12886.4	12992.7	16201.8	13690.4	18951.7	14401.7	15351.9	17728.3	13215.5	16281.3	15827.3	-1.23198	-1.02868	-1.19763	0.16759	0.197675	0.772027	0.197675
O94822	LTN1	26046	E3 ubiquitin-protein ligase listerin [OS=Homo sapiens]	cell organization and biogenesis;cellular homeostasis	12292.7	14104.4	16185.7	4627.01	5367.87	7121.92	15092.8	11601.7	11585	14194.3	5705.6	12759.8	2.48778	2.23637	1.11242	0.00236373	0.0033432	0.0042763	0.362085
Q9NVH6	TMLHE	55217	Trimethyllysine dioxygenase, mitochondrial [OS=Homo sapiens]	cellular homeostasis;metabolic process	4597.64	8421.37	5844.73	6071.61	9371.16	7280.32	5175.82	3125.26	4253.66	6287.91	7574.36	4184.91	-1.20459	-1.80992	1.50252	0.100758	0.36173	0.121883	0.23662
Q9UDY2	TJP2	9414	Tight junction protein ZO-2 [OS=Homo sapiens]	cell communication;cell growth;cellular homeostasis;conjugation;metabolic process	307268	361690	339866	217136	158712	153836	258140	262586	283419	336274	176561	268048	1.90458	1.51816	1.25453	0.00104107	0.00103527	0.00888312	0.0209866
Q49AR2	C5orf22	55322	UPF0489 protein C5orf22 [OS=Homo sapiens]		56736.6	42514	42727.3	11928.7	25065.5	23286.4	49292.3	71640.3	62457.2	47326	20093.6	61129.9	2.35528	3.04227	-1.29168	0.00386132	0.0150822	0.00422064	0.10962
Q8NFF5	FLAD1	80308	FAD synthase [OS=Homo sapiens]	cellular homeostasis	116316	74576.1	76341.8	64418.5	77011.6	63841.8	116055	98749.1	88135.8	89078	68424	100980	1.30185	1.4758	-1.13361	0.124342	0.262341	0.154584	0.409489
Q8N163	CCAR2	57805	Cell cycle and apoptosis regulator protein 2 [OS=Homo sapiens]	cell death;cell differentiation;cell growth;cellular component movement;cellular homeostasis;coagulation;development;metabolic process	1.49563e+06	1.24879e+06	1.37169e+06	1.31831e+06	656084	1.06019e+06	1.4358e+06	1.51579e+06	1.14376e+06	1.37204e+06	1.01153e+06	1.36512e+06	1.3564	1.34955	1.00507	0.179464	0.1715	0.1715	0.972337
O14662	STX16	8675	Syntaxin-16 [OS=Homo sapiens]	cell growth;conjugation	10789.8	12960.3	11152.4	12701.5	11345.8	13691.6	10897.5	13714.2	14391.2	11634.2	12579.7	13001	-1.08127	1.03349	-1.11748	0.52684	0.675407	0.731365	0.675407
Q9UBN7	HDAC6	10013	Histone deacetylase 6 [OS=Homo sapiens]	cell growth;cell organization and biogenesis;cellular homeostasis;coagulation;conjugation;defense response;metabolic process	51455.7	52066	49136.7	41059	55405.2	21655.2	39183.6	50613.2	28898.7	50886.2	39373.1	39565.2	1.29241	1.00488	1.28614	0.434671	0.418488	0.98455	0.418488
O00468	AGRN	375790	Agrin [OS=Homo sapiens]	cell death;cell growth;defense response;development;metabolic process	5282.6	2722.35	7913.84	369602	123166	401976	22239.5	37367.3	42219.5	5306.26	298248	33942.1	-56.2068	-8.78696	-6.39661	0.0121616	0.0157226	0.0157226	0.704837
P15941	MUC1	4582	Mucin-1 [OS=Homo sapiens]	cell differentiation;coagulation;development;metabolic process	26442.9	41693.4	24103.3	23470.6	17796.3	19363.9	21150.9	19901.5	17604.3	30746.5	20210.3	19552.2	1.52133	-1.03366	1.57253	0.100822	0.104926	0.895133	0.104926
Q86XP3	DDX42	11325	ATP-dependent RNA helicase DDX42 [OS=Homo sapiens]	metabolic process	387500	363834	383915	221112	110806	196669	312596	298275	332372	378416	176196	314415	2.1477	1.78446	1.20356	0.0012014	0.001323	0.00474346	0.070202
Q9UPN6	SCAF8	22828	SR-related and CTD-associated factor 8 [OS=Homo sapiens]	cellular component movement;cellular homeostasis;metabolic process	36446.1	34926.8	22267.6	12893.2	12148.3	16566.4	25664.6	28475.6	22556.4	31213.5	13869.3	25565.5	2.25055	1.84332	1.22092	0.0141766	0.0161479	0.0428786	0.215688
Q7LBC6	KDM3B	51780	Lysine-specific demethylase 3B [OS=Homo sapiens]	cell organization and biogenesis;cellular homeostasis;metabolic process	105476	151048	107448	117456	105932	104391	116467	106020	117905	121324	109260	113464	1.11042	1.03848	1.06927	0.659793	0.756777	0.756777	0.756777
Q7L5D6	GET4	51608	Golgi to ER traffic protein 4 homolog [OS=Homo sapiens]	cell growth;cell organization and biogenesis;cellular homeostasis;coagulation;metabolic process	26002.3	40444.2	24745.7	19124.4	24445.6	25740.1	29719.4	26036.4	24625.4	30397.4	23103.3	26793.8	1.31571	1.15974	1.13449	0.350222	0.463387	0.463387	0.463387
O75448	MED24	9862	Mediator of RNA polymerase II transcription subunit 24 [OS=Homo sapiens]	cell organization and biogenesis;cellular homeostasis;metabolic process	26794.8	19898.5	27260.1	21293.1	21506.9	10941	30289.5	32898.7	25970.2	24651.1	17913.7	29719.5	1.3761	1.65904	-1.2056	0.0568096	0.192521	0.0642141	0.232988
P09496	CLTA	1211	Clathrin light chain A [OS=Homo sapiens]	cell differentiation;cell growth;conjugation;metabolic process	223439	422876	314168	273914	192609	551284	382327	237335	237943	320161	339269	285868	-1.05968	-1.1868	1.11996	0.883929	0.865166	0.865166	0.865166
P51648	ALDH3A2	224	Aldehyde dehydrogenase family 3 member A2 [OS=Homo sapiens]	cellular homeostasis;defense response;metabolic process	54507.9	58138.3	46791.7	43830.1	59850.4	64037.4	43682.9	43938.2	48322.2	53146	55906	45314.4	-1.05193	-1.23373	1.17283	0.24991	0.653874	0.343984	0.343984
A0AV96	RBM47	54502	RNA-binding protein 47 [OS=Homo sapiens]	cellular component movement;cellular homeostasis;defense response	459775	458398	472271	203567	61068.4	163473	298308	253667	294195	463481	142703	282057	3.24788	1.97653	1.64322	0.000381093	0.000373382	0.00901854	0.00390218
Q7Z392	TRAPPC11	60684	Trafficking protein particle complex subunit 11 [OS=Homo sapiens]	cell growth;conjugation;metabolic process	14179.7	15266.4	15756.4	6589.36	11402.9	2904.03	12146.6	13175.9	13732.5	15067.5	6965.44	13018.3	2.16319	1.86899	1.15741	0.0191839	0.0240662	0.0404431	0.3625
Q9H6T3	RPAP3	79657	RNA polymerase II-associated protein 3 [OS=Homo sapiens]		24338.5	19219.7	19112.7	12862.5	12975.1	12898.2	19810.3	22339.9	19376.1	20890.3	12911.9	20508.8	1.61791	1.58836	1.0186	0.00401893	0.00471324	0.00471324	0.819199
Q9BQG0	MYBBP1A	10514	Myb-binding protein 1A [OS=Homo sapiens]	cellular homeostasis;coagulation;development;metabolic process	90654.9	107861	82446.7	65164.8	27025.3	33677	73966.9	76523.7	87135.1	93654.3	41955.7	79208.6	2.23222	1.88791	1.18238	0.0119225	0.014276	0.0299732	0.26862
Q9H3K6	BOLA2; BOLA2B	552900; 654483	BolA-like protein 2 [OS=Homo sapiens]	cell growth;cell organization and biogenesis;cellular homeostasis;metabolic process	230910	136952	181877	174105	344978	367463	375278	326874	278708	183246	295515	326953	-1.61267	1.10638	-1.78423	0.10968	0.159385	0.613918	0.153218
P06132	UROD	7389	Uroporphyrinogen decarboxylase [OS=Homo sapiens]	cellular homeostasis	70446.4	37813.1	70381.2	34134.1	37754.7	40820.7	75152.5	73464.6	63081.5	59546.9	37569.8	70566.2	1.58497	1.87827	-1.18505	0.0344277	0.0907149	0.0401822	0.29126
Q86X29	LSR	51599	Lipolysis-stimulated lipoprotein receptor [OS=Homo sapiens]	cell growth;defense response;metabolic process	33660.4	39156.6	31407.8	11958.1	12120.9	10148.1	21642.4	20867.1	23090.7	34741.6	11409	21866.7	3.0451	1.91662	1.58879	7.88768e-05	7.59468e-05	0.00205987	0.00105114
Q9Y371	SH3GLB1	51100	Endophilin-B1 [OS=Homo sapiens]	cell growth;cellular homeostasis;coagulation;metabolic process	48178	47444.1	46276.5	50252.4	105794	61553.7	60723.9	64348.2	48081.7	47299.5	72533.4	57717.9	-1.53349	-1.25669	-1.22026	0.287204	0.391997	0.49712	0.49712
Q9BQI0	AIF1L	83543	Allograft inflammatory factor 1-like [OS=Homo sapiens]	cell growth	36682.5	24858.5	46693	53596.5	42319.2	153848	84826.7	68961.1	74604.2	36078	83254.4	76130.7	-2.30762	-1.09357	-2.11017	0.301827	0.33799	0.818069	0.33799
Q9UK41	VPS28	51160	Vacuolar protein sorting-associated protein 28 homolog [OS=Homo sapiens]	cell growth;cell organization and biogenesis;cellular homeostasis;conjugation;metabolic process	11198.3	16238.8	18077.3	15839	18603.7	25751.5	20993.7	22827.6	17569.1	15171.5	20064.7	20463.5	-1.32253	1.01987	-1.34881	0.260034	0.265005	0.9048	0.265005
Q13084	MRPL28	10573	39S ribosomal protein L28, mitochondrial [OS=Homo sapiens]	cell organization and biogenesis;cellular homeostasis	25605.5	45050.8	53725.9	14406.1	20112.9	19955	39294	33833	23597.6	41460.7	18158	32241.5	2.28333	1.77561	1.28594	0.0665032	0.0771648	0.187824	0.287932
Q13277	STX3	6809	Syntaxin-3 [OS=Homo sapiens]	cell death;cell growth;conjugation;defense response;metabolic process	24846.4	20728.4	28308	19667	20763.7	10986.1	17020.9	20019.7	12773.4	24627.6	17138.9	16604.7	1.43694	-1.03217	1.48317	0.112532	0.118035	0.884943	0.118035
Q9H1B7	IRF2BPL	64207	Probable E3 ubiquitin-protein ligase IRF2BPL [OS=Homo sapiens]	cell organization and biogenesis;cellular homeostasis;defense response;metabolic process	136607	140010	123445	129613	90111.4	137955	125839	123566	101801	133354	119227	117069	1.11849	-1.01843	1.13911	0.500955	0.536746	0.884098	0.536746
P31327	CPS1	1373	Carbamoyl-phosphate synthase [ammonia], mitochondrial [OS=Homo sapiens]	cell organization and biogenesis;cellular homeostasis;coagulation;defense response;metabolic process	8618.26	11623.6	8943.16	12827.8	14589.9	8511.47	9151.9	7873.69	8211.52	9728.34	11976.4	8412.37	-1.23108	-1.42366	1.15643	0.185626	0.349761	0.240845	0.467194
O43278	SPINT1	6692	Kunitz-type protease inhibitor 1 [OS=Homo sapiens]	cell growth;defense response;metabolic process	174540	174349	149699	437503	422597	358620	291154	301700	221580	166196	406240	271478	-2.44434	-1.4964	-1.63348	0.000542009	0.000531852	0.0055153	0.0114106
P29992	GNA11	2767	Guanine nucleotide-binding protein subunit alpha-11 [OS=Homo sapiens]	cell death;defense response;development;metabolic process	12341.8	22022.3	10253.7	16120.9	16268.6	11300.7	13343.9	12336.3	12582.7	14872.6	14563.4	12754.3	1.02123	-1.14184	1.16609	0.78866	0.927428	0.897763	0.897763
Q9NRW7	VPS45	11311	Vacuolar protein sorting-associated protein 45 [OS=Homo sapiens]	conjugation	57781.9	59399.2	56181.3	41343	33142.3	38867.6	55145.9	55101.8	48476.3	57787.5	37784.3	52908	1.52941	1.40026	1.09223	0.000909707	0.00111398	0.00244474	0.130814
Q5JSH3	WDR44	54521	WD repeat-containing protein 44 [OS=Homo sapiens]		33055	30510.2	31198.4	26965.9	25327.9	17378	25008.6	35667.8	30183.7	31587.9	23223.9	30286.7	1.36014	1.30412	1.04296	0.111689	0.139768	0.139768	0.725944
P25325	MPST	4357	3-mercaptopyruvate sulfurtransferase [OS=Homo sapiens]	cellular homeostasis;defense response;metabolic process	105431	98249.6	100379	89544.7	126625	86063.5	114140	107984	113764	101353	100744	111963	1.00604	1.11136	-1.10468	0.54413	0.957125	0.549586	0.549586
Q9NW64	RBM22	55696	Pre-mRNA-splicing factor RBM22 [OS=Homo sapiens]	cellular component movement;cellular homeostasis;metabolic process	153311	184086	155843	148715	38596.4	112520	194039	211976	195654	164413	99943.8	200556	1.64506	2.00669	-1.21983	0.0304875	0.0918494	0.0346376	0.245007
Q04726	TLE3	7090	Transducin-like enhancer protein 3 [OS=Homo sapiens]	cell death;defense response;development;metabolic process	103734	106831	84430.2	10665.2	35644.4	14854.1	82404.6	69098	83646.2	98331.5	20387.9	78382.9	4.82303	3.84458	1.2545	0.000400359	0.000478314	0.00119769	0.076238
P49840	GSK3A	2931	Glycogen synthase kinase-3 alpha [OS=Homo sapiens]	cell death;cell growth;cell organization and biogenesis;cellular homeostasis;conjugation;defense response;development;metabolic process	15931.3	15933.2	17548.9	23910.8	22098	28145.8	13485.5	55548.5	47910.1	16471.1	24718.2	38981.4	-1.5007	1.57703	-2.36665	0.183737	0.469037	0.344813	0.238428
Q07817	BCL2L1	598	Bcl-2-like protein 1 [OS=Homo sapiens]	cell differentiation;cell growth;coagulation;conjugation;defense response;development;metabolic process	24481	24569.3	24809.1	16971.6	16329.4	19387	18316.9	21757	11840.6	24619.8	17562.7	17304.9	1.40183	-1.0149	1.42271	0.043319	0.0449275	0.921024	0.0449275
Q08209	PPP3CA	5530	Serine/threonine-protein phosphatase 2B catalytic subunit alpha isoform [OS=Homo sapiens]	cell death;cell differentiation;cell organization and biogenesis;cellular homeostasis;coagulation;conjugation;defense response;development;metabolic process	301711	299322	282966	237539	130127	218224	257805	266170	249233	294667	195297	257736	1.50882	1.31972	1.14329	0.0307777	0.034656	0.0976758	0.230938
Q96MW1	CCDC43	124808	Coiled-coil domain-containing protein 43 [OS=Homo sapiens]		32704.9	55395.2	38955.5	40462.8	55706.1	35620.9	54660.6	28615.8	35260	42351.8	43929.9	39512.1	-1.03726	-1.11181	1.07187	0.90211	0.877103	0.877103	0.877103
Q8N1F7	NUP93	9688	Nuclear pore complex protein Nup93 [OS=Homo sapiens]	cell growth;cellular homeostasis;conjugation;development;metabolic process	474825	850791	637099	513885	192079	620563	863452	768936	719728	654238	442175	784039	1.47959	1.77314	-1.1984	0.127737	0.278639	0.158008	0.395701
Q8N543	OGFOD1	55239	Prolyl 3-hydroxylase OGFOD1 [OS=Homo sapiens]	cell differentiation;cell growth;cell organization and biogenesis;cellular homeostasis;metabolic process	83160.5	103397	99514.4	49219.5	46243.9	45367.8	137575	165417	109391	95357.4	46943.7	137461	2.03131	2.92821	-1.44154	0.00210114	0.0213329	0.00208137	0.0249462
Q92930	RAB8B	51762	Ras-related protein Rab-8B [OS=Homo sapiens]	cell growth;conjugation;metabolic process	11452.6	9237.22	9169.15	16136.4	11882.4	9439.87	8997.34	10167.1	8061.52	9952.98	12486.2	9075.3	-1.25452	-1.37585	1.09671	0.219087	0.307375	0.307375	0.639793
P82650	MRPS22	56945	28S ribosomal protein S22, mitochondrial [OS=Homo sapiens]		120206	97577.4	120427	70052.8	51053.4	53251.6	68474.2	86096.4	74730	112737	58119.3	76433.5	1.93975	1.31512	1.47496	0.00243212	0.00264184	0.0865953	0.0100014
Q96FX8	PERP	64065	p53 apoptosis effector related to PMP-22 [OS=Homo sapiens]	cell communication;cell growth;cell organization and biogenesis;cellular homeostasis;defense response;development;metabolic process	154324	124827	141192	87448.7	51349.6	108133	81016.9	76052	80322.7	140114	82310.6	79130.5	1.70226	-1.04019	1.77067	0.012049	0.013748	0.842086	0.013748
O75368	SH3BGRL	6451	SH3 domain-binding glutamic acid-rich-like protein [OS=Homo sapiens]		51799.8	49311.1	45887.8	77286	125926	113859	90746.7	83783	81023	48999.6	105690	85184.3	-2.15696	-1.24072	-1.73847	0.0098839	0.0107631	0.145199	0.0382427
Q9UMS0	NFU1	27247	NFU1 iron-sulfur cluster scaffold homolog, mitochondrial [OS=Homo sapiens]	cell growth;cell organization and biogenesis;cellular homeostasis	13911.1	85735.7	54353.9	49688.4	86962.1	39045.8	71503	44552.8	17440.3	51333.6	58565.4	44498.7	-1.14088	-1.31612	1.1536	0.849681	0.788072	0.788072	0.788072
Q9H1C7	CYSTM1	84418	Cysteine-rich and transmembrane domain-containing protein 1 [OS=Homo sapiens]		54857.6	55206.3	48901.5	54081.1	80366.8	52089	64519.3	49472.2	55343.4	52988.5	62178.9	56445	-1.17344	-1.10158	-1.06523	0.575035	0.695745	0.695745	0.695745
Q13363	CTBP1	1487	C-terminal-binding protein 1 [OS=Homo sapiens]	cell growth;cell organization and biogenesis;cellular homeostasis;metabolic process	76481.7	72092.5	87588.4	93964.1	70012.2	89969.7	84548.2	71722.7	69770.2	78720.8	84648.7	75347	-1.0753	-1.12345	1.04478	0.541184	0.690364	0.690364	0.690364
Q9NXE4	SMPD4	55627	Sphingomyelin phosphodiesterase 4 [OS=Homo sapiens]	cell growth;cellular homeostasis;metabolic process	54468.5	60465.4	49827.1	38677.7	16285.4	34155.5	40466.3	43402.3	40264.1	54920.3	29706.2	41377.6	1.84878	1.39289	1.3273	0.0184916	0.0194724	0.107756	0.106284
Q13464	ROCK1	6093	Rho-associated protein kinase 1 [OS=Homo sapiens]	cell communication;cell differentiation;cell growth;cell organization and biogenesis;cellular homeostasis;defense response;development;metabolic process	23360.9	27923.3	14038.4	27817.7	26123.3	8788.93	23618.4	24260.1	27893.5	21774.2	20910	25257.3	1.04133	1.20791	-1.15996	0.760527	0.891605	0.881239	0.881239
P23786	CPT2	1376	Carnitine O-palmitoyltransferase 2, mitochondrial [OS=Homo sapiens]	cellular homeostasis;conjugation;defense response;metabolic process	382176	444781	411051	389451	502913	340071	271532	265203	266504	412670	410812	267746	1.00452	-1.53433	1.54127	0.0213679	0.966209	0.0217265	0.0217265
Q14919	DRAP1	10589	Dr1-associated corepressor [OS=Homo sapiens]	cellular component movement;cellular homeostasis;metabolic process	7238.4	7726.56	7574.9	6443.11	8936.49	5164.14	10734.9	11546.2	7250.4	7513.28	6847.91	9843.84	1.09716	1.43749	-1.31019	0.163329	0.653773	0.224321	0.224321
Q8NBU5	ATAD1	84896	Outer mitochondrial transmembrane helix translocase [OS=Homo sapiens]	metabolic process	175483	224917	183374	155457	28461	88097.8	159030	162328	167344	194591	90672	162901	2.1461	1.79659	1.19454	0.0461481	0.0561347	0.102177	0.367483
Q9BRP4	PAAF1	80227	Proteasomal ATPase-associated factor 1 [OS=Homo sapiens]		23583	22331.9	34562.6	32557	36549.6	37669.4	28604.7	32175.3	33596.3	26825.8	35592	31458.7	-1.32678	-1.13139	-1.1727	0.129626	0.155905	0.297613	0.297613
Q9BTY7	HGH1	51236	Protein HGH1 homolog [OS=Homo sapiens]		6356.98	5463.03	8755.09	2806.67	3469.88	6923.37	10307.4	7814.85	4518.96	6858.37	4399.97	7547.08	1.55873	1.71526	-1.10042	0.29252	0.36431	0.36431	0.729173
Q99963	SH3GL3	6457	Endophilin-A3 [OS=Homo sapiens]	conjugation;defense response;development;metabolic process	20772.9	20138	17004.4	12775.2	15441.9	13417.8	18041.5	17340.3	21454.9	19305.1	13878.3	18945.6	1.39102	1.36512	1.01898	0.0224344	0.02578	0.02578	0.824609
P35658	NUP214	8021	Nuclear pore complex protein Nup214 [OS=Homo sapiens]	cell differentiation;cellular homeostasis;conjugation;metabolic process	42287.8	87747.1	79379.3	93310.5	20994.6	89336	91051.9	78177.5	89199.4	69804.7	67880.3	86142.9	1.02835	1.26904	-1.23406	0.689171	0.934744	0.743772	0.743772
Q16718	NDUFA5	4698	NADH dehydrogenase [ubiquinone] 1 alpha subcomplex subunit 5 [OS=Homo sapiens]	cell growth;cellular homeostasis;conjugation	41750.2	47615.9	45937.3	45991.9	43561.1	77178.8	57571.7	43595.6	53067.1	45101.1	55577.3	51411.5	-1.23228	-1.08103	-1.13992	0.574611	0.678326	0.678326	0.678326
Q8IV38	ANKMY2	57037	Ankyrin repeat and MYND domain-containing protein 2 [OS=Homo sapiens]		72818.1	73641.6	68458.5	100502	137036	76293.8	147696	127794	156243	71639.4	104611	143911	-1.46024	1.37568	-2.00883	0.0117579	0.0853839	0.0744721	0.0121901
O76024	WFS1	7466	Wolframin [OS=Homo sapiens]	cell organization and biogenesis;cellular homeostasis;coagulation;defense response;development;metabolic process	143707	107499	132370	67442.7	65734.1	65418.3	80020.4	68883.9	83454.6	127859	66198.4	77453	1.93145	1.17001	1.65079	0.00135276	0.00185992	0.27884	0.00266345
P53365	ARFIP2	23647	Arfaptin-2 [OS=Homo sapiens]	cell growth;cellular homeostasis;conjugation;development;metabolic process	3549.09	4635.05	6631.71	7413.79	7051.26	5490.7	8746.75	9725.17	4297.71	4938.62	6651.92	7589.88	-1.34692	1.14101	-1.53684	0.323113	0.497757	0.584393	0.460561
Q92621	NUP205	23165	Nuclear pore complex protein Nup205 [OS=Homo sapiens]	cell growth;conjugation	89899.6	301541	253403	308269	9500.23	244652	287555	304418	256672	214948	187474	282882	1.14655	1.50891	-1.31605	0.590224	0.774069	0.728667	0.728667
Q96S66	CLCC1	23155	Chloride channel CLIC-like protein 1 [OS=Homo sapiens]	conjugation	26483.7	42744.6	19241.7	34794.4	51157.7	20104	32630.9	29627.8	20763.3	29490	35352	27674	-1.19878	-1.27745	1.06562	0.723617	0.852205	0.852205	0.857804
P19823	ITIH2	3698	Inter-alpha-trypsin inhibitor heavy chain H2 [OS=Homo sapiens]	cellular homeostasis;metabolic process	275516	186549	217554	1.09729e+06	3.19938e+06	1.13514e+06	1.08979e+06	697628	2.2219e+06	226540	1.8106e+06	1.33644e+06	-7.99242	-1.35479	-5.89936	0.133736	0.175314	0.511189	0.229962
Q8N2G8	GHDC	84514	GH3 domain-containing protein [OS=Homo sapiens]		32623.4	28190.1	30204.4	25109.5	28328.7	26802.3	44712.3	41925.2	36359.1	30339.3	26746.9	40998.9	1.13431	1.53285	-1.35135	0.0024316	0.182796	0.0029592	0.00636654
Q99816	TSG101	7251	Tumor susceptibility gene 101 protein [OS=Homo sapiens]	cell differentiation;cell growth;cell organization and biogenesis;cellular homeostasis;conjugation;defense response;metabolic process	69053.9	85805.3	72400.6	67809.7	74226.4	78081.5	76313.8	71122.6	77575.9	75753.3	73372.5	75004.1	1.03245	1.02224	1.00999	0.894326	0.888102	0.888102	0.888102
Q9UKV8	AGO2	27161	Protein argonaute-2 [OS=Homo sapiens]	cell growth;cell organization and biogenesis;cellular component movement;cellular homeostasis;defense response;metabolic process	105182	94191.7	97747	49458.8	38247.4	77749	91977	53480.6	55359.2	99040.1	55151.7	66938.9	1.79578	1.21372	1.47956	0.0514851	0.0654378	0.440532	0.0983152
Q4VC31	MIX23	131076	Protein MIX23 [OS=Homo sapiens]		49457.4	39994.6	59639.7	56235.7	99897.4	179108	67632.9	58477.7	50910.7	49697.2	111747	59007.1	-2.24856	-1.89379	-1.18733	0.163126	0.193667	0.193667	0.766707
O14976	GAK	2580	Cyclin-G-associated kinase [OS=Homo sapiens]	cell differentiation;cell growth;cell organization and biogenesis;cellular homeostasis;conjugation;metabolic process	82681.8	86650.8	79052.2	20783.3	19672.8	37549.1	68392.4	80728.9	68134.6	82794.9	26001.7	72418.6	3.18421	2.78515	1.14328	0.000187474	0.000256941	0.000396749	0.138984
Q9NP77	SSU72	29101	RNA polymerase II subunit A C-terminal domain phosphatase SSU72 [OS=Homo sapiens]	cell organization and biogenesis;cellular component movement;cellular homeostasis	50172.8	41714.5	39382	24030.3	28449.7	23333.5	34550.9	40603.6	30929.9	43756.4	25271.2	35361.4	1.73148	1.39928	1.23741	0.00787341	0.00806407	0.0548573	0.0673469
Q9Y6M7	SLC4A7	9497	Sodium bicarbonate cotransporter 3 [OS=Homo sapiens]	conjugation;defense response;metabolic process	34452.4	37493.8	32082.8	80661.5	53074.2	70274	23801.6	30618.1	27186.2	34676.3	68003.2	27202	-1.96108	-2.49994	1.27477	0.00223984	0.0043085	0.00307976	0.319118
Q92620	DHX38	9785	Pre-mRNA-splicing factor ATP-dependent RNA helicase PRP16 [OS=Homo sapiens]	cellular component movement;cellular homeostasis	70923.2	58059.6	65477	32216.1	32875.8	31764.8	46778.8	56292.5	36646.2	64819.9	32285.6	46572.5	2.00771	1.44252	1.39181	0.00323872	0.00326313	0.0420528	0.0249588
Q9Y3D7	PAM16	51025	Mitochondrial import inner membrane translocase subunit TIM16 [OS=Homo sapiens]	cell growth;conjugation;metabolic process	12649	12954.6	15543.6	16197.8	17546.9	29687.8	18919.6	14632.6	12666.8	13715.7	21144.2	15406.3	-1.5416	-1.37244	-1.12326	0.214972	0.285378	0.285378	0.678733
Q9P0J7	KCMF1	56888	E3 ubiquitin-protein ligase KCMF1 [OS=Homo sapiens]	cell death;cell organization and biogenesis;cellular homeostasis	27212.4	33293.1	28902.8	22081.4	27403.7	11707.2	22929.3	19040.6	22040.2	29802.7	20397.4	21336.7	1.4611	1.04605	1.39678	0.118518	0.131697	0.828703	0.131697
P53701	HCCS	3052	Holocytochrome c-type synthase [OS=Homo sapiens]	cell growth;cell organization and biogenesis;cellular homeostasis;defense response	26652.1	48065.5	29441.9	9550.65	20296	8138.83	14016.1	19856.1	13107.8	34719.8	12661.8	15660	2.74208	1.23679	2.2171	0.0298621	0.0405097	0.663319	0.0405097
Q9BWF3	RBM4	5936	RNA-binding protein 4 [OS=Homo sapiens]	cell organization and biogenesis;cellular component movement;cellular homeostasis;coagulation;metabolic process	530406	765896	649987	374937	95489.4	430651	656051	405645	591857	648763	300359	551184	2.15996	1.83508	1.17703	0.061214	0.0774699	0.117547	0.441219
Q9Y223	GNE	10020	Bifunctional UDP-N-acetylglucosamine 2-epimerase/N-acetylmannosamine kinase [OS=Homo sapiens]	cell communication;cellular homeostasis	28829.6	24440.7	40653.8	18393.5	16340.3	9773.14	40723.4	41449.4	38770.1	31308	14835.7	40314.3	2.11032	2.71739	-1.28767	0.00379151	0.0163918	0.00407049	0.0942034
Q96ER3	SAAL1	113174	Protein SAAL1 [OS=Homo sapiens]	metabolic process	52912.4	54319.1	69146.1	19198.3	24683.7	20956.7	38509.6	40308.6	37884.6	58792.5	21612.9	38900.9	2.72025	1.79989	1.51134	0.000512349	0.000497735	0.00837359	0.00656389
Q9NR46	SH3GLB2	56904	Endophilin-B2 [OS=Homo sapiens]		289527	419594	423614	344173	511013	432094	416391	367579	339944	377578	429094	374638	-1.13644	-1.14536	1.00785	0.583042	0.593651	0.593651	0.960068
O00754	MAN2B1	4125	Lysosomal alpha-mannosidase [OS=Homo sapiens]	cell organization and biogenesis;cellular homeostasis	62377.8	62290	60619.3	23311.5	33983.8	18577.3	39487.9	40035.8	40052.1	61762.3	25290.9	39858.6	2.44208	1.57601	1.54954	0.000205103	0.000204332	0.00814997	0.00167064
Q9BTE3	MCMBP	79892	Mini-chromosome maintenance complex-binding protein [OS=Homo sapiens]	cell differentiation;cell growth;cellular homeostasis;metabolic process	101627	79750.5	114126	77008.2	39689.8	52472.4	195449	186911	163736	98500.9	56390.1	182032	1.74678	3.22809	-1.84802	0.000351647	0.0264042	0.00037443	0.00171916
P53602	MVD	4597	Diphosphomevalonate decarboxylase [OS=Homo sapiens]	cellular homeostasis;metabolic process	14194.7	8489.63	17037	15299.5	14478.5	13429.3	12854.8	13474	15695.6	13240.5	14402.4	14008.1	-1.08776	-1.02815	-1.05798	0.870064	0.864506	0.864506	0.864506
Q6PGP7	TTC37	9652	Tetratricopeptide repeat protein 37 [OS=Homo sapiens]	cellular component movement;cellular homeostasis	70870.4	53430.9	114835	48426.7	37820	43628	91827.8	93556.9	122961	79712	43291.6	102782	1.84128	2.37418	-1.28941	0.0362797	0.118396	0.0407419	0.229035
O95336	PGLS	25796	6-phosphogluconolactonase [OS=Homo sapiens]	cellular homeostasis	174106	63335	82741.6	167101	229112	267638	192031	141086	169564	106728	221284	167560	-2.07335	-1.32062	-1.56998	0.0667094	0.0754972	0.213953	0.213953
P78417	GSTO1	9446	Glutathione S-transferase omega-1 [OS=Homo sapiens]	cellular homeostasis;development;metabolic process	43361.8	33929.4	50082.1	33761	55159.2	47261.2	61342.8	53430	38232.2	42457.8	45393.8	51001.7	-1.06915	1.12354	-1.20123	0.614571	0.739946	0.739946	0.739946
O00267	SUPT5H	6829	Transcription elongation factor SPT5 [OS=Homo sapiens]	cellular component movement;cellular homeostasis;metabolic process	105957	65119.2	88329.1	33984.2	21969.1	47095.1	48087.2	93978.7	100001	86468.5	34349.5	80689	2.51732	2.34906	1.07163	0.0470704	0.0576063	0.0576063	0.752912
O75607	NPM3	10360	Nucleoplasmin-3 [OS=Homo sapiens]	cell growth;cellular component movement;cellular homeostasis	31985.9	77307.9	63746	13266.9	8658.28	9402.51	61107.9	22005.4	50442.7	57679.9	10442.6	44518.7	5.52353	4.26319	1.29563	0.0425095	0.0529809	0.0869874	0.401292
Q9BPW8	NIPSNAP1	8508	Protein NipSnap homolog 1 [OS=Homo sapiens]	metabolic process	181721	152643	119292	173856	185563	154470	86649.6	84503.7	92219.6	151218	171296	87791	-1.13277	-1.95118	1.72248	0.00568612	0.271664	0.00711369	0.0130871
Q14C86	GAPVD1	26130	GTPase-activating protein and VPS9 domain-containing protein 1 [OS=Homo sapiens]	conjugation;development;metabolic process	161807	266225	154990	275576	420246	241785	149172	141915	155524	194341	312536	148870	-1.60818	-2.09938	1.30544	0.0532961	0.104312	0.0671527	0.428653
P13929	ENO3	2027	Beta-enolase [OS=Homo sapiens]	cellular homeostasis;metabolic process	207534	173107	161870	168485	228414	173820	243758	245215	210979	180837	190239	233317	-1.052	1.22644	-1.29021	0.100478	0.674309	0.134336	0.134336
Q12979	ABR	29	Active breakpoint cluster region-related protein [OS=Homo sapiens]	development;metabolic process	124653	113376	127894	59667.6	52394.4	18978.6	86410.1	44590.6	111000	121974	43680.2	80667	2.79244	1.84676	1.51207	0.0185342	0.0194824	0.102136	0.102136
P83436	COG7	91949	Conserved oligomeric Golgi complex subunit 7 [OS=Homo sapiens]	cell growth;cell organization and biogenesis;cellular homeostasis;conjugation;metabolic process	5689.23	7919.85	6650.16	6591.21	5610.84	3751.87	6428.06	4918.79	6835.56	6753.08	5317.98	6060.8	1.26986	1.13968	1.11422	0.401843	0.507816	0.507816	0.507816
Q9BQ52	ELAC2	60528	Zinc phosphodiesterase ELAC protein 2 [OS=Homo sapiens]	cellular component movement;cellular homeostasis	62531.3	64461.8	55010.1	17149.7	20697.4	13568	62504.2	46167.2	43703.4	60667.7	17138.3	50791.6	3.53988	2.96362	1.19444	0.00057884	0.000728946	0.00145983	0.12929
Q9ULK4	MED23	9439	Mediator of RNA polymerase II transcription subunit 23 [OS=Homo sapiens]	cellular component movement;cellular homeostasis;metabolic process	37986	45092.2	37621	34663	16565	25359.8	40487.7	42574	32689.1	40233	25529.3	38583.6	1.57596	1.51135	1.04275	0.0613633	0.0737498	0.0737498	0.766513
Q9BSJ2	TUBGCP2	10844	Gamma-tubulin complex component 2 [OS=Homo sapiens]	cell differentiation;cell growth;defense response	12766.7	17450.2	12480.7	8092.76	8320.88	7825.12	15104.8	14476.7	12897.3	14232.5	8079.59	14159.6	1.76154	1.75252	1.00515	0.00756871	0.00792941	0.00792941	0.960874
O43617	TRAPPC3	27095	Trafficking protein particle complex subunit 3 [OS=Homo sapiens]	conjugation	168412	72804.8	168040	208474	198558	296179	260708	251641	211638	136419	234403	241329	-1.71826	1.02955	-1.76903	0.0593309	0.06455	0.862486	0.06455
O14787	TNPO2	30000	Transportin-2 [OS=Homo sapiens]	conjugation	7267.76	8564.75	6079.94	4123.29	4806.08	6740.4	8510.63	6690.73	4173.98	7304.15	5223.26	6458.44	1.39839	1.23648	1.13095	0.361212	0.517635	0.552401	0.552401
Q9NRX2	MRPL17	63875	39S ribosomal protein L17, mitochondrial [OS=Homo sapiens]	cell organization and biogenesis;cellular homeostasis	5746.15	59038.4	109005	32539.2	38183.1	48557.6	70006.2	71581.4	38718.6	57929.9	39760	60102.1	1.45699	1.51162	-1.0375	0.708567	0.769621	0.769621	0.93649
Q9C0J8	WDR33	55339	pre-mRNA 3' end processing protein WDR33 [OS=Homo sapiens]	cell proliferation;cellular component movement;cellular homeostasis;coagulation;metabolic process	35245.1	42304	40027.3	26942.3	6395.29	30313.5	33437	24819.5	28146	39192.1	21217	28800.8	1.8472	1.35744	1.3608	0.0908168	0.106751	0.298098	0.254401
O15400	STX7	8417	Syntaxin-7 [OS=Homo sapiens]	cell growth;conjugation;metabolic process	38821.1	40553.6	53478.2	54745	49030.4	60191.9	47375.9	44495.2	29926.9	44284.3	54655.7	40599.3	-1.2342	-1.34622	1.09076	0.15248	0.232204	0.208735	0.584182
Q53EP0	FNDC3B	64778	Fibronectin type III domain-containing protein 3B [OS=Homo sapiens]		67088.4	54434	63215.7	2975.1	3973.69	1898.15	6549.87	4807.79	22255.4	61579.4	2948.98	11204.3	20.8816	3.7994	5.49602	7.9008e-05	0.000118899	0.183132	0.00014111
Q7Z2W9	MRPL21	219927	39S ribosomal protein L21, mitochondrial [OS=Homo sapiens]	cell organization and biogenesis;cellular homeostasis	132191	95519.9	132446	27790.7	33576.1	53444.1	85248.5	89049.7	31886.9	120052	38270.3	68728.4	3.13695	1.79587	1.74676	0.014525	0.0158637	0.163231	0.0550215
Q4G0F5	VPS26B	112936	Vacuolar protein sorting-associated protein 26B [OS=Homo sapiens]	coagulation;conjugation;metabolic process	15908	12808.1	13621.4	8077.76	5204.49	10862.9	14716.8	15879.8	11302.6	14112.5	8048.4	13966.4	1.75346	1.7353	1.01046	0.0302339	0.0310985	0.0310985	0.9412
Q9H1C4	UNC93B1	81622	Protein unc-93 homolog B1 [OS=Homo sapiens]	coagulation;conjugation;development;metabolic process	13227.2	12949.4	12226.9	3319.66	4706.6	3656.76	14820.1	16857.3	11798.1	12801.2	3894.34	14491.8	3.28713	3.72125	-1.13207	0.000336462	0.000631419	0.00048485	0.23179
Q96D71	REPS1	85021	RalBP1-associated Eps domain-containing protein 1 [OS=Homo sapiens]	conjugation	10541.3	19051.5	15668.8	15081.9	17927.5	10228.7	16502.7	15349.4	17145	15087.2	14412.7	16332.4	1.0468	1.13319	-1.08253	0.787577	0.815234	0.815234	0.815234
P31483	TIA1	7072	Nucleolysin TIA-1 isoform p40 [OS=Homo sapiens]	metabolic process	962951	1.02669e+06	810207	652976	341794	617267	803076	926132	778453	933283	537346	835887	1.73684	1.55559	1.11652	0.0200566	0.0254304	0.0409131	0.380373
Q9Y3D6	FIS1	51024	Mitochondrial fission 1 protein [OS=Homo sapiens]	cell growth;cellular homeostasis;coagulation;conjugation;development;metabolic process	30007	23206.8	25904.4	51318.3	68492	66795.2	44944	39516	38852.2	26372.7	62201.8	41104.1	-2.35856	-1.51328	-1.55858	0.00111216	0.00111731	0.0083379	0.0257165
Q12996	CSTF3	1479	Cleavage stimulation factor subunit 3 [OS=Homo sapiens]	cellular component movement;cellular homeostasis	449418	349408	482044	432787	168005	357143	288830	388459	343516	426957	319312	340268	1.33711	1.06563	1.25477	0.382386	0.444649	0.79151	0.444649
Q9NR28	DIABLO	56616	Diablo homolog, mitochondrial [OS=Homo sapiens]	coagulation;development;metabolic process	9154.68	5806.54	8145.74	12693.9	16794.2	19245.3	10103.4	6631.24	10830.8	7702.32	16244.5	9188.46	-2.10903	-1.76792	-1.19295	0.0125926	0.0177674	0.020727	0.496128
P30419	NMT1	4836	Glycylpeptide N-tetradecanoyltransferase 1 [OS=Homo sapiens]	cell growth;cell organization and biogenesis;cellular homeostasis;conjugation;defense response;metabolic process	714714	721778	700972	640716	357029	625420	613772	691204	688615	712488	541055	664530	1.31685	1.22821	1.07217	0.157106	0.212394	0.247986	0.562109
O60645	EXOC3	11336	Exocyst complex component 3 [OS=Homo sapiens]	conjugation;metabolic process	4381.99	8320.19	6310.73	7038.59	5984.12	3300.01	5589.41	5690.65	3463.8	6337.64	5440.91	4914.62	1.16481	-1.10709	1.28955	0.625533	0.725094	0.725094	0.725094
Q9BVS4	RIOK2	55781	Serine/threonine-protein kinase RIO2 [OS=Homo sapiens]	cell differentiation;cell organization and biogenesis;cellular component movement;cellular homeostasis;metabolic process	11259.6	12955.3	13950.5	5137.4	3787.92	5975.96	11907	17211.8	11196.8	12721.8	4967.09	13438.5	2.56122	2.70551	-1.05634	0.00519986	0.00673192	0.00673192	0.697305
Q9BQ67	GRWD1	83743	Glutamate-rich WD repeat-containing protein 1 [OS=Homo sapiens]	cell growth;cellular homeostasis	30711.3	20149.2	36389	14056.6	6790.07	14783.6	36118	36243.1	32225.1	29083.2	11876.8	34862.1	2.44875	2.93532	-1.1987	0.00561034	0.0135864	0.00689868	0.249984
Q15291	RBBP5	5929	Retinoblastoma-binding protein 5 [OS=Homo sapiens]	cell organization and biogenesis;cellular homeostasis;coagulation;metabolic process	75933.1	84492.8	63533.2	44965.8	26294.5	46191.6	71550.8	66603.7	57364.8	74653	39150.7	65173.1	1.90681	1.66467	1.14546	0.0107628	0.0130757	0.0259668	0.280248
Q9H173	SIL1	64374	Nucleotide exchange factor SIL1 [OS=Homo sapiens]	conjugation;metabolic process	16032.2	17572.3	13938.3	14786.5	20415.5	18886.3	19131.9	16475.7	15592.9	15847.6	18029.5	17066.9	-1.13768	-1.0564	-1.07694	0.529467	0.619136	0.619136	0.619136
Q6Y7W6	GIGYF2	26058	GRB10-interacting GYF protein 2 [OS=Homo sapiens]	cell differentiation;cell organization and biogenesis;cellular homeostasis;coagulation;defense response;development;metabolic process	214850	209501	217082	140050	96901.3	115894	267193	293624	286255	213811	117615	282357	1.81789	2.40069	-1.32059	3.1343e-05	0.000329513	3.056e-05	0.00135288
O75381	PEX14	5195	Peroxisomal membrane protein PEX14 [OS=Homo sapiens]	cell growth;conjugation;metabolic process	14594.5	25194.1	18731.1	41138.8	51419.7	25518.3	24480	14194.6	14983.7	19506.6	39358.9	17886.1	-2.01773	-2.20053	1.0906	0.0430369	0.0487332	0.0487332	0.828723
Q9UH99	SUN2	25777	SUN domain-containing protein 2 [OS=Homo sapiens]	cell differentiation;cell growth;conjugation;defense response;metabolic process	85746.9	74907.8	82721.2	46119.8	25336.7	34135.9	61194.5	49318.3	44413.6	81125.3	35197.5	51642.1	2.30486	1.46721	1.57091	0.00158795	0.00167399	0.0546534	0.00789643
Q2Q1W2	TRIM71	131405	E3 ubiquitin-protein ligase TRIM71 [OS=Homo sapiens]	cell differentiation;cell organization and biogenesis;cellular component movement;cellular homeostasis;defense response;development;metabolic process	90830.2	101213	105284	38322.3	20173.1	23485.1	80017.7	79678.2	78585.8	99109.2	27326.8	79427.2	3.62681	2.90657	1.2478	4.27357e-05	4.91506e-05	0.000154165	0.014241
Q7L5N7	LPCAT2	54947	Lysophosphatidylcholine acyltransferase 2 [OS=Homo sapiens]	cell growth;cellular homeostasis	375531	340755	346848	339255	338448	303770	237996	236019	264699	354378	327157	246238	1.0832	-1.32862	1.43917	0.000894042	0.1194	0.00250443	0.00108039
Q92552	MRPS27	23107	28S ribosomal protein S27, mitochondrial [OS=Homo sapiens]	cell differentiation;metabolic process	71148.4	80333.1	90878.8	43477.1	36134.1	24521	69228.6	63002.7	55284.2	80786.8	34710.7	62505.2	2.32743	1.80075	1.29248	0.00211062	0.00216156	0.0130666	0.0455461
Q86SX6	GLRX5	51218	Glutaredoxin-related protein 5, mitochondrial [OS=Homo sapiens]	cell growth;cell organization and biogenesis;cellular homeostasis;defense response	40137.1	38578.9	29694.7	39413.8	19999.3	58304	49735.5	42095.6	33221.5	36136.9	39239	41684.2	-1.08584	1.06231	-1.15351	0.864666	0.81828	0.81828	0.81828
Q9Y6D9	MAD1L1	8379	Mitotic spindle assembly checkpoint protein MAD1 [OS=Homo sapiens]	cell differentiation;cell growth;defense response;development;metabolic process	26064.5	22997	25360.8	24584.2	16815.6	31740.6	27737.4	7080.28	21165.3	24807.4	24380.1	18661	1.01753	-1.30648	1.32937	0.566946	0.946784	0.581415	0.581415
Q6UXN9	WDR82	80335	WD repeat-containing protein 82 [OS=Homo sapiens]	cell organization and biogenesis;cellular homeostasis	95390.3	98535.3	96388.4	63854.7	35679.4	48163.8	94494.9	83129.2	68499	96771.3	49232.6	82041	1.96559	1.6664	1.17955	0.00518038	0.00586913	0.0168518	0.15621
Q9UKV3	ACIN1	22985	Apoptotic chromatin condensation inducer in the nucleus [OS=Homo sapiens]	cell growth;cellular component movement;cellular homeostasis;defense response;metabolic process	205303	424333	304692	322426	13693.5	241805	277326	248934	323541	311443	192641	283267	1.6167	1.47044	1.09947	0.459653	0.552615	0.552615	0.772618
Q9NQE9	HINT3	135114	Histidine triad nucleotide-binding protein 3 [OS=Homo sapiens]		30783.5	40760	34723.8	58841.1	79264.5	37902.2	32307.4	26498.5	22961.2	35422.4	58669.3	27255.7	-1.65627	-2.15255	1.29963	0.0521296	0.0965446	0.0669512	0.45707
Q13131	PRKAA1	5562	5'-AMP-activated protein kinase catalytic subunit alpha-1 [OS=Homo sapiens]	cell death;cell organization and biogenesis;cellular homeostasis;coagulation;conjugation;development;metabolic process	117725	105238	102348	110715	16819.2	96744.7	121737	143458	132265	108437	74759.6	132487	1.45048	1.77217	-1.22179	0.141992	0.333181	0.17482	0.368304
Q92614	MYO18A	399687	Unconventional myosin-XVIIIa [OS=Homo sapiens]	cell growth;cell proliferation;cellular homeostasis;conjugation;metabolic process	34136.6	85798.9	60497.3	76136.8	20035.3	51661.3	46044.3	44251.1	43502.4	60144.3	49277.8	44599.3	1.22051	-1.1049	1.34855	0.691807	0.803756	0.803756	0.803756
Q05209	PTPN12	5782	Tyrosine-protein phosphatase non-receptor type 12 [OS=Homo sapiens]	cell organization and biogenesis;cellular homeostasis;metabolic process	4596.76	8151.93	6281.38	5288.25	4707.05	5530.06	4697.35	4198.53	5664.97	6343.35	5175.12	4853.62	1.22574	-1.06624	1.30693	0.312859	0.384077	0.741538	0.384077
Q9BT22	ALG1	56052	Chitobiosyldiphosphodolichol beta-mannosyltransferase [OS=Homo sapiens]	cell organization and biogenesis;cellular homeostasis	41135.3	35171.4	37433.9	21717.9	30086.3	20685.5	33582	37172.3	24843	37913.5	24163.3	31865.8	1.56906	1.31877	1.18979	0.041932	0.0463115	0.16463	0.191175
Q9UID3	VPS51	738	Vacuolar protein sorting-associated protein 51 homolog [OS=Homo sapiens]	cell growth;cellular homeostasis;conjugation;defense response	16000.6	24942.1	21082.2	6244	4845.34	4847.47	20456.2	21844.7	13612.1	20674.9	5312.27	18637.7	3.89192	3.50842	1.10931	0.00420148	0.00640323	0.00643114	0.52084
Q5JPH6	EARS2	124454	Probable glutamate--tRNA ligase, mitochondrial [OS=Homo sapiens]	cell organization and biogenesis;cellular component movement;cellular homeostasis	18344.7	15868.2	16501.1	7152.87	6214.69	22174.7	13136.6	13624.6	9148.14	16904.6	11847.4	11969.8	1.42686	1.01033	1.41228	0.472279	0.460313	0.978813	0.460313
Q9NVE7	PANK4	55229	4'-phosphopantetheine phosphatase [OS=Homo sapiens]	cellular homeostasis	35311	41077.1	35993.1	37600.8	42907.1	44304.6	46751.2	46761.4	47161.7	37460.4	41604.2	46891.4	-1.11062	1.12709	-1.25176	0.0158538	0.113231	0.083844	0.0167093
Q2M2I8	AAK1	22848	AP2-associated protein kinase 1 [OS=Homo sapiens]	cell growth;cell organization and biogenesis;cellular homeostasis;conjugation;metabolic process	141722	103976	92955.6	56884.4	78134.3	47806.2	95461.9	131505	138553	112885	60941.6	121840	1.85234	1.99929	-1.07933	0.0286753	0.0403037	0.0403037	0.633382
Q8TAQ2	SMARCC2	6601	SWI/SNF complex subunit SMARCC2 [OS=Homo sapiens]	cell growth;defense response;metabolic process	24648.7	37701.8	32879.4	25438.1	10138.8	18947.4	19563.3	23406.9	23001.2	31743.3	18174.8	21990.5	1.74656	1.20994	1.4435	0.0748378	0.0956447	0.463647	0.138603
Q96Q11	TRNT1	51095	CCA tRNA nucleotidyltransferase 1, mitochondrial [OS=Homo sapiens]	cellular component movement;cellular homeostasis	104041	159529	158353	152664	172791	155197	94497.1	92033.9	172267	140641	160217	119599	-1.13919	-1.33962	1.17594	0.375595	0.491024	0.491024	0.491024
Q8WX93	PALLD	23022	Palladin [OS=Homo sapiens]	cell communication;cell growth;defense response;metabolic process	33678.8	28069.9	29606.7	17034	26964.9	11987.2	22700.3	24439.7	17677	30451.8	18662	21605.7	1.63175	1.15774	1.40943	0.0693964	0.0913797	0.508148	0.118416
Q15027	ACAP1	9744	Arf-GAP with coiled-coil, ANK repeat and PH domain-containing protein 1 [OS=Homo sapiens]	conjugation	162300	74350.2	175227	135092	43818.9	104577	122874	149598	119889	137292	94495.9	130787	1.45289	1.38405	1.04974	0.462273	0.505187	0.505187	0.857739
Q9BQA1	WDR77	79084	Methylosome protein 50 [OS=Homo sapiens]	cell growth;defense response;metabolic process	340692	309068	286434	245599	270987	248408	347786	340016	311774	312065	254998	333192	1.22379	1.30665	-1.0677	0.00910526	0.0227513	0.0109781	0.259497
Q9NZN8	CNOT2	4848	CCR4-NOT transcription complex subunit 2 [OS=Homo sapiens]	cellular component movement;cellular homeostasis;defense response;metabolic process	45299.4	10620.1	11585.5	5092.22	4228.95	4359.88	42497.9	40535.3	6093.08	22501.7	4560.35	29708.8	4.9342	6.51458	-1.32029	0.234536	0.344202	0.329724	0.610358
Q9Y2L5	TRAPPC8	22878	Trafficking protein particle complex subunit 8 [OS=Homo sapiens]	cell growth;cellular homeostasis;conjugation	50857.3	42811.2	38221.3	44935	27142.9	27512.9	33699.6	29014.6	28790.9	43963.2	33196.9	30501.7	1.32432	-1.08836	1.44134	0.124717	0.170052	0.659144	0.170052
P30876	POLR2B	5431	DNA-directed RNA polymerase II subunit RPB2 [OS=Homo sapiens]	cellular component movement;cellular homeostasis	98497.2	44486.5	39718.7	8041.76	5021.31	43567.2	152444	124709	115862	60900.8	18876.8	131005	3.22623	6.94002	-2.15112	0.00441729	0.0861471	0.00466536	0.0211863
Q96MW5	COG8	84342	Conserved oligomeric Golgi complex subunit 8 [OS=Homo sapiens]	conjugation	23149.9	22394.9	23751.8	16455.5	14056.1	23168	22646.9	20845.9	17784.9	23098.9	17893.2	20425.9	1.29093	1.14154	1.13086	0.20154	0.256111	0.355497	0.355497
Q2M389	WASHC4	23325	WASH complex subunit 4 [OS=Homo sapiens]	cell growth;conjugation	21773.2	22796	26431.6	11447.8	6367.16	7085.86	16330.9	16954.5	21135.7	23666.9	8300.28	18140.4	2.85134	2.18551	1.30466	0.00102492	0.00107291	0.00540106	0.0408295
Q96AX1	VPS33A	65082	Vacuolar protein sorting-associated protein 33A [OS=Homo sapiens]	cell growth;cellular homeostasis;conjugation;defense response;metabolic process	31467.4	39630.5	36497.7	13285.4	12107.2	8958.55	46466.3	40727.9	33595.8	35865.2	11450.4	40263.4	3.13222	3.51633	-1.12263	0.000527524	0.000948786	0.00077167	0.28619
Q99543	DNAJC2	27000	DnaJ homolog subfamily C member 2 [OS=Homo sapiens]	cell growth;cellular homeostasis;metabolic process	57565.4	61789.6	53624.3	51603.3	43606.1	39379.6	62361.1	63153.6	55201.6	57659.8	44863	60238.8	1.28524	1.34273	-1.04473	0.0192075	0.0298294	0.0274949	0.549308
Q01082	SPTBN1	6711	Spectrin beta chain, non-erythrocytic 1 [OS=Homo sapiens]	cell differentiation;cell growth;cell organization and biogenesis;cellular homeostasis;conjugation;development;metabolic process	1.30265e+06	1.76782e+06	1.35099e+06	1.48584e+06	455237	1.26375e+06	952032	819179	922858	1.47382e+06	1.06827e+06	898023	1.37962	-1.18959	1.64118	0.196458	0.306063	0.571568	0.268511
Q9NVG8	TBC1D13	54662	TBC1 domain family member 13 [OS=Homo sapiens]	conjugation;metabolic process	60510	47309.5	49022.6	19886.3	29675.6	24876.9	35927.7	42562	31961.6	52280.7	24813	36817.1	2.10699	1.48379	1.42001	0.00370805	0.00374998	0.0468459	0.0274122
P10398	ARAF	369	Serine/threonine-protein kinase A-Raf [OS=Homo sapiens]	cell organization and biogenesis;cellular homeostasis;development;metabolic process	8752.69	11413.4	9076.99	9306.27	9234.5	7890.97	9920.44	10778.7	12369.8	9747.7	8810.58	11023	1.10636	1.25111	-1.13083	0.154677	0.374095	0.191899	0.358827
P35270	SPR	6697	Sepiapterin reductase [OS=Homo sapiens]	cellular homeostasis	55044	34255.7	48974.4	62343	80104.4	48282.6	49873	48695.8	36968.4	46091.4	63576.7	45179.1	-1.37936	-1.40721	1.02019	0.180685	0.180157	0.180157	0.927797
Q6ZMI0	PPP1R21	129285	Protein phosphatase 1 regulatory subunit 21 [OS=Homo sapiens]		20296.8	18392.3	19689.1	20173.9	20206.5	12291.3	17545.1	17512.5	16730.3	19459.4	17557.2	17262.6	1.10834	-1.01706	1.12725	0.587088	0.633359	0.89827	0.633359
P35611	ADD1	118	Alpha-adducin [OS=Homo sapiens]	cell growth;metabolic process	36198.5	34598.5	36628.7	14637.7	3984.57	19392.9	22857.5	23915.4	22405.2	35808.6	12671.7	23059.4	2.82587	1.81975	1.55289	0.00257565	0.00257352	0.0330945	0.0222675
Q9UQ16	DNM3	26052	Dynamin-3 [OS=Homo sapiens]	cell growth;cellular homeostasis;conjugation;defense response;metabolic process	31985.8	25037.7	32108.4	26987	19939.2	24078.4	27351	39915.7	31067	29710.6	23668.2	32777.9	1.2553	1.38489	-1.10324	0.142825	0.266922	0.183282	0.468078
Q9UKG1	APPL1	26060	DCC-interacting protein 13-alpha [OS=Homo sapiens]	cell differentiation;conjugation;development;metabolic process	50059.6	92557.9	42939.3	39351	39402.5	35371.7	41270.8	44598.5	41292.7	61852.3	38041.7	42387.3	1.62591	1.11423	1.45922	0.21789	0.265514	0.744395	0.265514
O60888	CUTA	51596	Protein CutA [OS=Homo sapiens]	metabolic process	32491.7	19556.7	24252.3	33850.1	34240.1	48920.9	47933.7	42933.7	38854.3	25433.6	39003.7	43240.6	-1.53355	1.10863	-1.70014	0.041432	0.0740591	0.472237	0.0542002
Q9H223	EHD4	30844	EH domain-containing protein 4 [OS=Homo sapiens]	cell growth;conjugation;metabolic process	378693	478498	329055	454571	490045	318242	334045	419047	422014	395415	420953	391702	-1.06458	-1.07467	1.00948	0.873625	0.95312	0.95312	0.95312
Q9Y3L3	SH3BP1	23616	SH3 domain-binding protein 1 [OS=Homo sapiens]	cell growth;conjugation;development;metabolic process	65901.2	79503.6	62677.2	61314.7	46394.2	55526.9	60847	57119.7	59539.2	69360.7	54411.9	59168.7	1.27473	1.08742	1.17225	0.0877237	0.109489	0.426373	0.176024
P52294	KPNA1	3836	Importin subunit alpha-5 [OS=Homo sapiens]	cell death;cell differentiation;conjugation;development;metabolic process	76172.8	78507.8	70996.8	56470.8	50542.4	50681.1	84076.5	69202.5	72797.3	75225.8	52564.8	75358.8	1.43111	1.43364	-1.00177	0.00294709	0.00311158	0.00311158	0.976779
Q9UHD2	TBK1	29110	Serine/threonine-protein kinase TBK1 [OS=Homo sapiens]	cell differentiation;cell organization and biogenesis;cellular homeostasis;coagulation;development;metabolic process	56728.9	43692	59374.3	32887.5	28015.9	18100.4	273706	255635	48758	53265	26334.6	192700	2.02263	7.31736	-3.61775	0.0625597	0.664951	0.0847726	0.0847726
P16220	CREB1	1385	Cyclic AMP-responsive element-binding protein 1 [OS=Homo sapiens]	cell growth;cell organization and biogenesis;cellular component movement;cellular homeostasis;coagulation;conjugation;defense response;development;metabolic process	28840.2	26021.1	26031.3	27941.4	18977.8	26572.6	23942.2	26074.2	24193.5	26964.2	24497.3	24736.6	1.1007	1.00977	1.09005	0.573969	0.601127	0.925764	0.601127
O75832	PSMD10	5716	26S proteasome non-ATPase regulatory subunit 10 [OS=Homo sapiens]	cell growth;metabolic process	317330	192945	206442	315259	677883	673962	415629	454113	288064	238905	555701	385935	-2.32603	-1.43988	-1.61543	0.0764004	0.0874713	0.23401	0.23401
Q9UBD5	ORC3	23595	Origin recognition complex subunit 3 [OS=Homo sapiens]	cell differentiation;cell growth;cell proliferation;cellular homeostasis;metabolic process	28012	42968.5	30165.3	13852.1	7030.03	12152.9	34029.3	27378.1	20939.1	33715.3	11011.7	27448.8	3.06177	2.4927	1.22829	0.0116321	0.0139834	0.0289017	0.272027
P42226	STAT6	6778	Signal transducer and activator of transcription 6 [OS=Homo sapiens]	cell differentiation;coagulation;defense response;development;metabolic process	9918.89	8197.6	9444.46	8261.56	6981.99	9090.85	7872.7	11070.2	9089.45	9186.99	8111.47	9344.12	1.13259	1.15196	-1.0171	0.456728	0.486976	0.486976	0.880603
Q8IY67	RAVER1	125950	Ribonucleoprotein PTB-binding 1 [OS=Homo sapiens]	cellular component movement;cellular homeostasis	117320	118816	83848.5	114687	72572.7	79746.2	109130	99756.5	90141	106661	89002.1	99675.7	1.19841	1.11993	1.07008	0.524488	0.654092	0.654092	0.654092
O00159	MYO1C	4641	Unconventional myosin-Ic [OS=Homo sapiens]	cell growth;coagulation;conjugation;development;metabolic process	5984.74	10433.9	8246.13	4899.97	3168.33	6088.35	6789.04	7897.16	5825.24	8221.59	4718.88	6837.14	1.74227	1.44889	1.20249	0.101851	0.122331	0.25083	0.344109
P30039	PBLD	64081	Phenazine biosynthesis-like domain-containing protein [OS=Homo sapiens]	cellular homeostasis;metabolic process	32723.3	41049.5	40181.7	25989.4	32282.8	25690.2	46251.6	37435.1	40246	37984.8	27987.5	41310.9	1.35721	1.47605	-1.08756	0.0211071	0.0433622	0.0266604	0.378522
Q5JTZ9	AARS2	57505	Alanine--tRNA ligase, mitochondrial [OS=Homo sapiens]	cell organization and biogenesis;cellular component movement;cellular homeostasis	67520.4	78105.8	58573.1	48714.4	62107.8	43827.5	58703.6	62963.8	55174.4	68066.4	51549.9	58947.3	1.3204	1.1435	1.1547	0.120483	0.144379	0.310082	0.310082
Q9UK45	LSM7	51690	U6 snRNA-associated Sm-like protein LSm7 [OS=Homo sapiens]	cellular component movement;cellular homeostasis	32934.5	38322.6	35469.6	35826.8	40377.3	43058	57878.8	69868.4	44827	35575.6	39754	57524.7	-1.11745	1.44702	-1.61697	0.0279291	0.530573	0.0449612	0.0387182
Q9H251	CDH23	64072	Cadherin-23 [OS=Homo sapiens]	cell communication;cell growth;conjugation;defense response;metabolic process	139797	60832.8	70749.8	2.138e+06	5.94239e+06	2.19442e+06	1.31174e+06	955987	3.01013e+06	90460	3.42494e+06	1.75929e+06	-37.8614	-1.94678	-19.4482	0.0724324	0.0823042	0.197987	0.197987
Q14980	NUMA1	4926	Nuclear mitotic apparatus protein 1 [OS=Homo sapiens]	cell differentiation;cell growth;metabolic process	335111	492588	450557	269270	86542.1	334295	433873	400070	455236	426085	230036	429727	1.85226	1.86808	-1.00855	0.0545308	0.054161	0.054161	0.961793
Q9H444	CHMP4B	128866	Charged multivesicular body protein 4b [OS=Homo sapiens]	cell differentiation;cell growth;cell organization and biogenesis;cellular homeostasis;conjugation;metabolic process	83808.8	87148.9	121688	152578	223102	316688	188154	168744	130063	97548.5	230789	162320	-2.36589	-1.42182	-1.66399	0.053985	0.0600414	0.177504	0.177504
Q13952	NFYC	4802	Nuclear transcription factor Y subunit gamma [OS=Homo sapiens]	metabolic process	25181.5	25666	23782	11221.1	8203.86	13244.3	19049.2	19238.9	13526.7	24876.5	10889.7	17271.6	2.2844	1.58604	1.44031	0.00128032	0.00126131	0.0186422	0.013278
Q8WVV9	HNRNPLL	92906	Heterogeneous nuclear ribonucleoprotein L-like [OS=Homo sapiens]	cellular component movement;cellular homeostasis;metabolic process	58588.8	45701.8	78447.5	25008	15619.1	15021.3	21483.4	46237	42182.7	60912.7	18549.5	36634.4	3.2838	1.97496	1.66272	0.0178625	0.0190122	0.130422	0.0854343
Q5TBB1	RNASEH2B	79621	Ribonuclease H2 subunit B [OS=Homo sapiens]	cellular component movement;cellular homeostasis;defense response;metabolic process	193019	147787	121142	45588.5	52984.4	73226.1	184955	130575	158540	153983	57266.3	158023	2.68888	2.75945	-1.02624	0.00667769	0.00754514	0.00754514	0.862977
Q96KG9	SCYL1	57410	N-terminal kinase-like protein [OS=Homo sapiens]	cell organization and biogenesis;cellular homeostasis;coagulation;conjugation;defense response;metabolic process	49636.7	42482	35867.9	5969.96	5270.75	7161.57	36232.3	43100.2	47109.7	42662.2	6134.09	42147.4	6.95493	6.871	1.01221	0.000179079	0.000201595	0.000201595	0.905985
Q00613	HSF1	3297	Heat shock factor protein 1 [OS=Homo sapiens]	cell growth;cell proliferation;cellular component movement;cellular homeostasis;coagulation;conjugation;development;metabolic process	16943.6	14472.3	15178.7	13769.1	10592.2	13094.2	12243.7	17667	17059.5	15531.5	12485.2	15656.7	1.244	1.25403	-1.00806	0.193021	0.189293	0.189293	0.944206
P11388	TOP2A	7153	DNA topoisomerase 2-alpha [OS=Homo sapiens]	cell differentiation;cell growth;cell proliferation;cellular homeostasis;coagulation;defense response;metabolic process	192854	148433	221442	61284	68366.4	33088.4	71369.2	152721	124572	187576	54246.2	116221	3.45787	2.14247	1.61396	0.00840731	0.00860329	0.0652792	0.061598
Q9Y5Q8	GTF3C5	9328	General transcription factor 3C polypeptide 5 [OS=Homo sapiens]	cellular component movement;cellular homeostasis;defense response	16621.4	15740.5	14798.7	11277.6	9077.42	12310.4	15869	16069	15714.4	15720.2	10888.5	15884.1	1.44375	1.4588	-1.01043	0.00216272	0.00247187	0.00247187	0.860399
O95633	FSTL3	10272	Follistatin-related protein 3 [OS=Homo sapiens]	defense response;metabolic process	27850.9	28564.7	20816.2	206431	425348	232198	179556	226049	108819	25743.9	287992	171475	-11.1868	-1.6795	-6.66078	0.0167717	0.0176844	0.113532	0.0896782
Q9UI30	TRMT112	51504	Multifunctional methyltransferase subunit TRM112-like protein [OS=Homo sapiens]	cell organization and biogenesis;cellular component movement;cellular homeostasis;metabolic process	62787.2	60595.3	86582.2	53357.6	64794.6	86542.6	200885	130645	83273.5	69988.2	68231.6	138268	1.02574	2.02645	-1.97559	0.0941442	0.954894	0.0926603	0.0926603
Q9HD33	MRPL47	57129	39S ribosomal protein L47, mitochondrial [OS=Homo sapiens]	cell organization and biogenesis;cellular homeostasis	78140.8	56604.6	77333	30213.4	22660.2	35768.6	55447.5	58386.4	48361.6	70692.8	29547.4	54065.2	2.39252	1.82978	1.30755	0.00308095	0.0031604	0.0188791	0.0544541
Q92845	KIFAP3	22920	Kinesin-associated protein 3 [OS=Homo sapiens]	cell growth;conjugation;development;metabolic process	4113.04	3467.64	4491.31	3875.07	4513.07	3421.66	4946.82	5774.5	3655.29	4024	3936.6	4792.2	1.0222	1.21734	-1.19091	0.37315	0.891877	0.388573	0.388573
P11216	PYGB	5834	Glycogen phosphorylase, brain form [OS=Homo sapiens]	cellular homeostasis	8348.81	9748.07	9954.47	8799.22	3324.65	3827.62	11632.4	8989.73	6209.29	9350.45	5317.16	8943.81	1.75854	1.68206	1.04547	0.156322	0.170441	0.170441	0.842446
P13984	GTF2F2	2963	General transcription factor IIF subunit 2 [OS=Homo sapiens]	cell growth;cellular component movement;cellular homeostasis	129724	154794	154469	136159	136719	108556	152337	134427	134439	146329	127145	140401	1.15088	1.10426	1.04222	0.293205	0.419966	0.426829	0.618158
Q8WZ82	OVCA2	124641	Esterase OVCA2 [OS=Homo sapiens]	metabolic process	8201.23	5117.11	8163.75	6089.88	8521.99	10088.9	13336.6	10305.1	7587.09	7160.7	8233.58	10409.6	-1.14983	1.26428	-1.45371	0.278357	0.583826	0.427441	0.390712
Q6P1L8	MRPL14	64928	39S ribosomal protein L14, mitochondrial [OS=Homo sapiens]	cell organization and biogenesis;cellular homeostasis	197703	222338	196030	82196.1	30843.1	38878.1	135184	139205	139068	205357	50639.1	137819	4.0553	2.7216	1.49005	0.000138652	0.00013464	0.00159117	0.00383277
P68032	ACTC1	70	Actin, alpha cardiac muscle 1 [OS=Homo sapiens]	cell growth;defense response;metabolic process	1.36196e+07	2.86135e+07	2.07803e+07	2.53483e+07	1.87446e+07	2.14824e+07	2.0159e+07	1.65179e+07	2.18523e+07	2.10044e+07	2.18584e+07	1.95097e+07	-1.04066	-1.12038	1.07661	0.847336	0.840895	0.840895	0.840895
Q7Z3D6	DGLUCY	80017	D-glutamate cyclase, mitochondrial [OS=Homo sapiens]	cellular homeostasis	17933.9	18261.5	18506.9	10064.4	11713.6	9876.68	11781	8094.93	12300	18234.1	10551.6	10725.3	1.7281	1.01647	1.7001	0.000978104	0.00110359	0.888591	0.00110359
Q15424	SAFB	6294	Scaffold attachment factor B1 [OS=Homo sapiens]	cell growth;development;metabolic process	67475.3	81117.2	82171	83704.9	32228.8	93759.7	141012	114235	113549	76921.2	69897.8	122932	1.10048	1.75874	-1.59816	0.0467606	0.704471	0.0604441	0.0604441
P40763	STAT3	6774	Signal transducer and activator of transcription 3 [OS=Homo sapiens]	cell death;cell differentiation;cell growth;cellular component movement;cellular homeostasis;coagulation;conjugation;defense response;development;metabolic process	11738.7	11783.9	14489.7	20077.1	49142.1	18188.5	16477.4	38146.8	8650.7	12670.8	29135.9	21091.6	-2.29946	-1.3814	-1.66459	0.381605	0.489286	0.489286	0.489286
Q9Y606	PUS1	80324	tRNA pseudouridine synthase A [OS=Homo sapiens]	cellular component movement;cellular homeostasis	221857	153762	176730	192252	141481	143267	166078	208185	149441	184116	159000	174568	1.15796	1.09791	1.05469	0.634702	0.721902	0.721902	0.721902
Q86YP4	GATAD2A	54815	Transcriptional repressor p66-alpha [OS=Homo sapiens]	cell proliferation;cellular homeostasis;metabolic process	226168	231142	236389	161231	130597	144227	199211	207514	188049	231233	145352	198258	1.59085	1.36399	1.16632	0.000212039	0.000213948	0.00152602	0.010067
Q16795	NDUFA9	4704	NADH dehydrogenase [ubiquinone] 1 alpha subcomplex subunit 9, mitochondrial [OS=Homo sapiens]	cell growth;cellular homeostasis;conjugation;metabolic process	369019	421504	389475	353960	125321	315136	427869	423710	375612	393332	264806	409063	1.48536	1.54477	-1.03999	0.102346	0.11714	0.11714	0.803782
Q9BVP2	GNL3	26354	Guanine nucleotide-binding protein-like 3 [OS=Homo sapiens]	cell differentiation;metabolic process	15571	29772.8	20574.3	23544.8	10771	10406.7	24080.3	23158.3	25129.6	21972.7	14907.5	24122.7	1.47394	1.61816	-1.09785	0.226453	0.301307	0.301307	0.677291
O15173	PGRMC2	10424	Membrane-associated progesterone receptor component 2 [OS=Homo sapiens]	conjugation;defense response;development	41238.4	89685.7	48804	116105	143209	125386	70226.9	33200.7	86608.4	59909.4	128234	63345.3	-2.14046	-2.02436	-1.05735	0.0189935	0.0211529	0.0211529	0.862159
Q12959	DLG1	1739	Disks large homolog 1 [OS=Homo sapiens]	cell communication;cell death;cell differentiation;cell growth;cell organization and biogenesis;cellular homeostasis;defense response;metabolic process	147256	204320	176249	137930	95321.6	152560	180925	118458	159518	175942	128604	152967	1.36809	1.18944	1.15019	0.234679	0.305385	0.38499	0.38499
Q9Y2I1	NISCH	11188	Nischarin [OS=Homo sapiens]	cell death;cell growth;cellular homeostasis;conjugation;development;metabolic process	16390.8	20108.4	17880.2	11972.2	13260.9	9834.6	21782.4	21295.6	20722.2	18126.5	11689.2	21266.7	1.5507	1.81934	-1.17324	0.000648659	0.00289241	0.000700149	0.0429752
Q12768	WASHC5	9897	WASH complex subunit 5 [OS=Homo sapiens]	cell differentiation;cell growth;conjugation;metabolic process	57575.7	49112.8	51670.5	32441.9	28792.7	14309.2	39958.5	46472.8	48323.5	52786.3	25181.2	44918.3	2.09625	1.7838	1.17516	0.00550686	0.00644881	0.0156748	0.193751
Q99871	HAUS7	55559	HAUS augmin-like complex subunit 7 [OS=Homo sapiens]	cell differentiation;cell growth;metabolic process	9670.96	7256.06	7696.23	4318.99	2653.16	7294.62	10795.3	11773.4	8166.65	8207.75	4755.59	10245.1	1.72592	2.15433	-1.24822	0.0314903	0.0991479	0.0355098	0.233835
Q8WW33	GTSF1	121355	Gametocyte-specific factor 1 [OS=Homo sapiens]	metabolic process	22268.8	31246	20008.2	19416	42862.2	17204.4	39941.8	73341	41646.9	24507.7	26494.2	51643.2	-1.08106	1.94923	-2.10723	0.0991228	0.868118	0.106039	0.106039
Q7Z434	MAVS	57506	Mitochondrial antiviral-signaling protein [OS=Homo sapiens]	coagulation;development;metabolic process	144544	248731	149961	149917	102351	102670	153161	116227	140838	181079	118313	136742	1.53051	1.15577	1.32424	0.208152	0.286865	0.583001	0.318515
Q92665	MRPS31	10240	28S ribosomal protein S31, mitochondrial [OS=Homo sapiens]		368246	319623	455229	180195	145893	112395	205695	220290	190033	381033	146161	205339	2.60694	1.40489	1.85562	0.00172312	0.0020911	0.159051	0.00462883
Q8IUD2	ERC1	23085	ELKS/Rab6-interacting/CAST family member 1 [OS=Homo sapiens]	cell death;cell growth;cell organization and biogenesis;cellular homeostasis;conjugation;defense response;development;metabolic process	20465	16390	23345.7	11516.3	5608.36	13066.1	17214.7	21239.9	21531.2	20066.9	10063.6	19995.3	1.99401	1.98689	1.00358	0.0160558	0.0162743	0.0162743	0.979915
P00813	ADA	100	Adenosine deaminase [OS=Homo sapiens]	cell communication;cellular homeostasis;coagulation;conjugation;defense response;metabolic process	23464.1	15382	9949.76	29748.1	41799.6	27315	37121.1	33204.9	27493.2	16265.3	32954.2	32606.4	-2.02605	-1.01067	-2.00466	0.0335283	0.0341134	0.95047	0.0341134
Q9BRT9	GINS4	84296	DNA replication complex GINS protein SLD5 [OS=Homo sapiens]	cell differentiation;cell proliferation;cellular homeostasis;coagulation;defense response	71399.9	59829.4	67764.1	13427.7	51109	10602.4	122671	76623.5	69643.3	66331.1	25046.3	89645.9	2.64834	3.5792	-1.35149	0.0270275	0.0843777	0.0305022	0.230912
P18615	NELFE	7936	Negative elongation factor E [OS=Homo sapiens]	metabolic process	61586.1	81924.8	69217.1	6494.74	25452.8	27595.5	45949.4	43291.9	48470.8	70909.3	19847.7	45904	3.57267	2.31282	1.54473	0.00141212	0.00138416	0.0149657	0.0149657
P55212	CASP6	839	Caspase-6 [OS=Homo sapiens]	cell organization and biogenesis;metabolic process	65714.6	65743.2	54824.6	50512.7	69245.9	66299.6	51018.5	48528.5	50098	62094.1	62019.4	49881.7	1.0012	-1.24333	1.24483	0.117988	0.989845	0.111811	0.111811
Q9H078	CLPB	81570	Caseinolytic peptidase B protein homolog [OS=Homo sapiens]	coagulation;development	105029	35928.9	91361.9	10980.4	18209.1	57605.2	95144.3	90450.7	70376.5	77440	28931.6	85323.8	2.67666	2.94916	-1.10181	0.0815297	0.101811	0.101811	0.730209
Q7RTS9	DYM	54808	Dymeclin [OS=Homo sapiens]	cell growth;defense response	8282.77	7770.34	8922.01	6972.06	7762.34	3898.52	8439.05	9832.69	9525.52	8325.04	6210.97	9265.75	1.34038	1.49184	-1.113	0.0673246	0.138939	0.0833304	0.408098
Q8WVM0	TFB1M	51106	Dimethyladenosine transferase 1, mitochondrial [OS=Homo sapiens]	cellular component movement;cellular homeostasis	40414	31595.7	36436	26166.4	13445.5	20708.4	30369.5	37788.8	38835.8	36148.5	20106.7	35664.7	1.79783	1.77377	1.01357	0.014899	0.0159632	0.0159632	0.913207
Q8IZE3	SCYL3	57147	Protein-associating with the carboxyl-terminal domain of ezrin [OS=Homo sapiens]	cell organization and biogenesis;cellular homeostasis;coagulation;defense response;metabolic process	9710.99	9098.91	10175.2	6125.25	6294.01	3997.79	8473.95	8897.59	9541.98	9661.71	5472.35	8971.17	1.76555	1.63936	1.07697	0.00208959	0.00297978	0.0037412	0.363358
P49916	LIG3	3980	DNA ligase 3 [OS=Homo sapiens]	cell differentiation;cell growth;cell proliferation;cellular homeostasis;coagulation;metabolic process	28110.6	34214	27026	11973.3	1698.04	13901.3	22203.7	21549.3	18020.3	29783.5	9190.85	20591.1	3.24056	2.24039	1.44643	0.00449712	0.00455065	0.0340267	0.0494861
Q9BY77	POLDIP3	84271	Polymerase delta-interacting protein 3 [OS=Homo sapiens]	cellular homeostasis;conjugation;metabolic process	376968	289571	401369	333060	49580.8	263981	338511	319436	327782	355969	215540	328576	1.65152	1.52443	1.08337	0.220773	0.274677	0.274677	0.727891
P16083	NQO2	4835	Ribosyldihydronicotinamide dehydrogenase [quinone] [OS=Homo sapiens]	cellular homeostasis;metabolic process	16410	21887.8	28776.4	7191.68	52450.9	6909.41	37480.6	32400.1	35878	22358.1	22184	35252.9	1.00785	1.58911	-1.57674	0.537135	0.989555	0.526634	0.526634
P02788	LTF	4057	Lactotransferrin [OS=Homo sapiens]	cell organization and biogenesis;coagulation;conjugation;defense response;metabolic process	531622	277510	357197	2.94747e+06	7.74563e+06	3.40504e+06	3.58141e+06	1.9319e+06	5.15142e+06	388776	4.69938e+06	3.55491e+06	-12.0876	-1.32194	-9.14384	0.0599743	0.0770311	0.463557	0.110297
Q9Y244	POMP	51371	Proteasome maturation protein [OS=Homo sapiens]	cell growth	6221.01	7827.29	5772.96	8811.46	17507.2	17588.6	11534.2	11878	7729.9	6607.09	14635.8	10380.7	-2.21516	-1.4099	-1.57115	0.0627229	0.0706448	0.206226	0.206226
Q12824	SMARCB1	6598	SWI/SNF-related matrix-associated actin-dependent regulator of chromatin subfamily B member 1 [OS=Homo sapiens]	cell differentiation;cell growth;cell proliferation;cellular component movement;cellular homeostasis;defense response;metabolic process	42934.7	44279.1	48537	39402.6	19342.2	27456.8	29063.5	39232.3	36742.6	45250.3	28733.9	35012.8	1.57481	1.21852	1.29239	0.0635607	0.0741617	0.300881	0.171757
Q14738	PPP2R5D	5528	Serine/threonine-protein phosphatase 2A 56 kDa regulatory subunit delta isoform [OS=Homo sapiens]	cell organization and biogenesis;cellular homeostasis;defense response;development;metabolic process	38998.8	34168.7	36337.1	7171	8002.3	3185.53	29677.4	38008.6	36936.2	36501.5	6119.61	34874.1	5.96468	5.69874	1.04667	4.79042e-05	6.17756e-05	6.17756e-05	0.569977
Q06787	FMR1	2332	Synaptic functional regulator FMR1 [OS=Homo sapiens]	cellular component movement;cellular homeostasis;coagulation;conjugation;defense response;development;metabolic process	55992.3	60147.7	65554.9	43888.1	18836	34760.8	47094.4	51225.7	43249.2	60565	32495	47189.8	1.86382	1.45222	1.28343	0.0160792	0.0167928	0.0914077	0.0914077
Q13795	ARFRP1	10139	ADP-ribosylation factor-related protein 1 [OS=Homo sapiens]	conjugation;defense response;development;metabolic process	15991.9	10866.7	14132.2	7770.94	6757.67	6799.17	10804.3	10567	10594.5	13663.6	7109.26	10655.3	1.92194	1.49879	1.28233	0.00580931	0.00589193	0.0450807	0.0533785
Q96AC1	FERMT2	10979	Fermitin family homolog 2 [OS=Homo sapiens]	cell communication;cell death;cell growth;defense response;development;metabolic process	340005	247771	302534	65520.7	172932	65289.5	253415	214023	248421	296770	101248	238620	2.93113	2.35679	1.24369	0.00546546	0.00629557	0.016565	0.175906
Q8IYB3	SRRM1	10250	Serine/arginine repetitive matrix protein 1 [OS=Homo sapiens]	cellular component movement;cellular homeostasis	279440	427106	289685	307420	126237	210477	244174	249549	277834	332077	214711	257186	1.54662	1.19782	1.29119	0.207062	0.273552	0.494411	0.37051
Q969S9	GFM2	84340	Ribosome-releasing factor 2, mitochondrial [OS=Homo sapiens]	cell growth;cell organization and biogenesis;cellular homeostasis	33165.3	38968.1	35585.3	31631.6	27457	27678.8	25766.1	35556.1	39963.9	35906.2	28922.5	33762	1.24146	1.16733	1.06351	0.25614	0.359655	0.383756	0.598039
O14981	BTAF1	9044	TATA-binding protein-associated factor 172 [OS=Homo sapiens]	cell growth;metabolic process	7875.41	6194.45	8815.85	4603.02	4329.85	4807.32	7876.44	8993	6785.74	7628.57	4580.06	7885.06	1.6656	1.72161	-1.03362	0.0122592	0.0149621	0.0149621	0.76552
Q9UJ83	HACL1	26061	2-hydroxyacyl-CoA lyase 1 [OS=Homo sapiens]	cell growth;cellular homeostasis;conjugation	30807.4	8976.81	17430.8	29251.3	24775.4	22223.1	16578.7	38101.2	18128.9	19071.7	25416.6	24269.6	-1.33269	-1.04726	-1.27255	0.70532	0.799345	0.888733	0.799345
Q9Y6I3	EPN1	29924	Epsin-1 [OS=Homo sapiens]	conjugation;defense response;development;metabolic process	44494.7	38972	45433.9	29274.8	30987.8	44817	28924.4	40529.9	26900.7	42966.9	35026.6	32118.3	1.22669	-1.09055	1.33777	0.210506	0.304325	0.619418	0.296091
Q8IUH5	ZDHHC17	23390	Palmitoyltransferase ZDHHC17 [OS=Homo sapiens]	cell growth;cell organization and biogenesis;cellular homeostasis;conjugation;defense response;metabolic process	33645.7	29578.6	43078.4	22093.8	19607.7	13968.1	26085	23703	19955.6	35434.3	18556.6	23247.8	1.90953	1.25281	1.5242	0.0151411	0.0182667	0.293785	0.0365668
Q9Y4P3	TBL2	26608	Transducin beta-like protein 2 [OS=Homo sapiens]	coagulation;development	92833.3	113840	108235	86992.9	61319.3	67126.8	73723.1	94458.7	47639.5	104970	71813	71940.5	1.46171	1.00177	1.45912	0.0834393	0.0795873	0.992902	0.0795873
Q9Y613	FHOD1	29109	FH1/FH2 domain-containing protein 1 [OS=Homo sapiens]	cell growth;conjugation;metabolic process	26157.8	46150	75784.4	38043.2	46151.2	10217.3	26156.6	23136.8	25890.2	49364.1	31470.6	25061.2	1.56858	-1.25575	1.96974	0.305404	0.406806	0.679462	0.406806
O75116	ROCK2	9475	Rho-associated protein kinase 2 [OS=Homo sapiens]	cell differentiation;cell growth;cell organization and biogenesis;cellular homeostasis;coagulation;defense response;development;metabolic process	28266.8	24609.2	26947.4	19238.4	18825.7	19418.9	32917.5	28913.6	23218	26607.8	19161	28349.7	1.38864	1.47955	-1.06547	0.0210924	0.0348988	0.0291475	0.505827
Q9NZB2	FAM120A	23196	Constitutive coactivator of PPAR-gamma-like protein 1 [OS=Homo sapiens]		520184	491537	503566	534437	281617	399519	1.39354e+06	389662	402571	505096	405191	728591	1.24656	1.79814	-1.44248	0.528998	0.731662	0.678233	0.678233
Q9Y6B6	SAR1B	51128	GTP-binding protein SAR1b [OS=Homo sapiens]	cell growth;conjugation;metabolic process	27707.1	38829.4	29212.5	24857.3	39202.6	15673.3	36201.4	23830	28428.8	31916.3	26577.7	29486.7	1.20087	1.10945	1.0824	0.753033	0.737889	0.737889	0.737889
O14618	CCS	9973	Copper chaperone for superoxide dismutase [OS=Homo sapiens]	cell organization and biogenesis;cellular homeostasis;coagulation;metabolic process	10566.4	10508.4	13739.6	18309.9	21970.5	13283.9	17949.4	16461.5	16425.8	11604.8	17854.8	16945.6	-1.53857	-1.05366	-1.46022	0.0659804	0.0853063	0.702675	0.0853063
O43765	SGTA	6449	Small glutamine-rich tetratricopeptide repeat-containing protein alpha [OS=Homo sapiens]	cell growth;cell organization and biogenesis;cellular homeostasis;coagulation;conjugation;metabolic process	105949	164687	148018	102794	174223	172185	195280	190498	149262	139551	149734	178347	-1.07297	1.19109	-1.278	0.382085	0.716144	0.487847	0.487847
P50895	BCAM	4059	Basal cell adhesion molecule [OS=Homo sapiens]	cell communication;development	859882	1.07436e+06	806819	2.29918e+06	1.90891e+06	1.75174e+06	717729	763794	699204	913686	1.98661e+06	726909	-2.17428	-2.73296	1.25695	0.000309804	0.000555361	0.000457766	0.258165
Q8NFW8	CMAS	55907	N-acylneuraminate cytidylyltransferase [OS=Homo sapiens]	cellular homeostasis	171398	136319	185691	230274	52848	130562	113897	116243	114527	164469	137895	114889	1.19272	-1.20024	1.43155	0.556403	0.616735	0.616735	0.616735
O15160	POLR1C	9533	DNA-directed RNA polymerases I and III subunit RPAC1 [OS=Homo sapiens]	cellular component movement;cellular homeostasis	109341	123516	34671.1	25644.7	85055.5	69437	109135	120854	105893	89176.2	60045.7	111961	1.48514	1.86459	-1.2555	0.236226	0.43165	0.309656	0.43165
Q9Y3R5	DOP1B	9980	Protein dopey-2 [OS=Homo sapiens]	cell growth;conjugation;defense response;metabolic process	21218.2	22750.3	22800.5	21369.7	24273.4	13327.8	22752.4	20885.8	15897.8	22256.3	19656.9	19845.3	1.13224	1.00958	1.12149	0.677718	0.71569	0.954686	0.71569
O95400	CD2BP2	10421	CD2 antigen cytoplasmic tail-binding protein 2 [OS=Homo sapiens]	cell growth;cellular component movement;cellular homeostasis	111608	129033	120383	75810.4	49098.2	64146.8	120963	121153	106233	120341	63018.5	116116	1.90962	1.84258	1.03639	0.000910066	0.00120245	0.00120245	0.638548
Q9Y6I8	PXMP4	11264	Peroxisomal membrane protein 4 [OS=Homo sapiens]		13200.1	14221.2	15258.3	6161.43	10603.3	12084.9	13411.1	14751.1	14703.6	14226.5	9616.54	14288.6	1.47938	1.48583	-1.00436	0.0395978	0.0394265	0.0394265	0.96982
Q15003	NCAPH	23397	Condensin complex subunit 2 [OS=Homo sapiens]	cell differentiation;cell growth;metabolic process	171584	187426	159398	55655.9	34536.6	55482.1	187694	197316	160984	172803	48558.2	181998	3.55867	3.74804	-1.05321	6.53368e-05	8.85564e-05	8.85564e-05	0.488572
O75179	ANKRD17	26057	Ankyrin repeat domain-containing protein 17 [OS=Homo sapiens]	coagulation;defense response;metabolic process	65488.7	83848	70891.2	36385.3	26708.5	18540.8	65727.1	57770.2	58895.3	73409.3	27211.6	60797.6	2.69773	2.23426	1.20744	0.00096192	0.00112391	0.0030075	0.0984391
P51116	FXR2	9513	Fragile X mental retardation syndrome-related protein 2 [OS=Homo sapiens]	metabolic process	23103.8	27965.5	29864.1	19226.8	11225.5	21729.9	31430.8	21142.5	24023.3	26977.8	17394	25532.2	1.55098	1.46787	1.05662	0.102461	0.128104	0.128104	0.727344
Q9UHI6	DDX20	11218	Probable ATP-dependent RNA helicase DDX20 [OS=Homo sapiens]	cell growth;cellular component movement;cellular homeostasis;metabolic process	61554.2	50351.3	50071.3	34261.2	23864.3	25131.2	52206.7	42778.9	57646	53992.3	27752.2	50877.2	1.94551	1.83327	1.06123	0.00545034	0.00785021	0.00785021	0.585628
Q3SYG4	BBS9	27241	Protein PTHB1 [OS=Homo sapiens]	cell growth;conjugation;metabolic process	334790	359966	325570	353645	231237	276594	485369	511411	378292	340109	287158	458357	1.18439	1.59618	-1.34768	0.0228105	0.284164	0.02684	0.0588973
P61960	UFM1	51569	Ubiquitin-fold modifier 1 [OS=Homo sapiens]	cell growth;cell organization and biogenesis;cellular homeostasis;coagulation;defense response;metabolic process	164020	124988	157330	197528	181931	278935	204382	222351	195856	148779	219464	207530	-1.4751	-1.05751	-1.39489	0.0833698	0.111257	0.676308	0.111257
Q8IVD9	NUDCD3	23386	NudC domain-containing protein 3 [OS=Homo sapiens]	cell growth;metabolic process	10954	10264.4	9448.43	11248.8	11002.9	11528	12168.3	13634	10760.9	10222.3	11259.9	12187.7	-1.10151	1.0824	-1.19227	0.112127	0.276248	0.276248	0.132793
P46939	UTRN	7402	Utrophin [OS=Homo sapiens]	defense response;metabolic process	9017.79	9128.45	8553.33	10308.4	7154.57	9252.7	4082.5	3902.4	5791.51	8899.86	8905.22	4592.13	-1.0006	-1.93923	1.93807	0.00475953	0.995508	0.00491603	0.00491603
O15230	LAMA5	3911	Laminin subunit alpha-5 [OS=Homo sapiens]	cell communication;cell growth;defense response;development;metabolic process	156163	71806.4	149214	306086	139541	328990	84736.7	83903.1	25608.3	125728	258206	64749.4	-2.05369	-3.98777	1.94176	0.033857	0.0830275	0.0401973	0.316761
Q9UJX5	ANAPC4	29945	Anaphase-promoting complex subunit 4 [OS=Homo sapiens]	cell differentiation;cell organization and biogenesis;cellular homeostasis;metabolic process	15136.2	9875.43	12382.5	6182.46	3693.34	5354.88	14563.2	11421.8	11458.3	12464.7	5076.89	12481.1	2.45519	2.45842	-1.00132	0.00556642	0.00574208	0.00574208	0.992242
Q96HR9	REEP6	92840	Receptor expression-enhancing protein 6 [OS=Homo sapiens]	cell growth;metabolic process	21078.1	23766.9	25256.5	32003.1	29725.3	34175.9	33328.9	27927.4	21532.4	23367.2	31968.1	27596.3	-1.36808	-1.15842	-1.18098	0.0875261	0.101077	0.226404	0.226404
P28288	ABCD3	5825	ATP-binding cassette sub-family D member 3 [OS=Homo sapiens]	cell growth;cellular homeostasis;conjugation;metabolic process	114258	93290	101796	55691.5	53225.1	57199.3	95824.6	89523	76830.2	103115	55372	87392.6	1.86222	1.57828	1.1799	0.00116504	0.00126251	0.00498782	0.0604491
Q14247	CTTN	2017	Src substrate cortactin [OS=Homo sapiens]	cell communication;cell growth;conjugation;defense response;metabolic process	1.37727e+06	1.77702e+06	1.29338e+06	1.26248e+06	1.0876e+06	1.16869e+06	1.36593e+06	1.15007e+06	1.49229e+06	1.48255e+06	1.17292e+06	1.3361e+06	1.26398	1.13912	1.10962	0.207386	0.264936	0.373408	0.373408
Q8NG85	OR2L3	391192	Olfactory receptor 2L3 [OS=Homo sapiens]	development;metabolic process	11472	18742.3	13179	15643.2	17461.9	17301.9	8269.02	18510.8	7241.93	14464.4	16802.3	11340.6	-1.16163	-1.48161	1.27546	0.353008	0.525957	0.500725	0.525957
Q9HBH5	RDH14	57665	Retinol dehydrogenase 14 [OS=Homo sapiens]	cellular homeostasis	17756.4	15352.3	14187.1	14964.2	15912.5	11056.4	16393	13807.3	11412.8	15765.2	13977.7	13871.1	1.12788	-1.00769	1.13655	0.563832	0.572561	0.956929	0.572561
P41743	PRKCI	5584	Protein kinase C iota type [OS=Homo sapiens]	cell growth;cell organization and biogenesis;cellular homeostasis;conjugation;defense response;development;metabolic process	42928.3	40670.8	40443.4	25843.1	37471.3	7485.21	32353.9	32575.3	30663	41347.5	23599.9	31864.1	1.75202	1.35018	1.29762	0.120992	0.144556	0.293112	0.293112
Q86YN1	DOLPP1	57171	Dolichyldiphosphatase 1 [OS=Homo sapiens]	cell organization and biogenesis;cellular homeostasis	6579.09	4617.13	5477.9	7795.64	5438.12	4701.46	5356.06	5933.19	5089.77	5558.04	5978.41	5459.67	-1.07563	-1.09501	1.01802	0.838477	0.91787	0.91787	0.91787
Q9H1P3	OSBPL2	9885	Oxysterol-binding protein-related protein 2 [OS=Homo sapiens]	cell growth;cellular homeostasis;conjugation	8701.53	5706.91	10819.7	8281.22	6835.15	7016.72	10786.9	7540.35	9920.51	8409.38	7377.69	9415.91	1.13984	1.27627	-1.11969	0.444645	0.52561	0.52561	0.52561
P49354	FNTA	2339	Protein farnesyltransferase/geranylgeranyltransferase type-1 subunit alpha [OS=Homo sapiens]	cell growth;cell organization and biogenesis;cellular homeostasis;development;metabolic process	80646.9	142589	154274	93064.3	140742	102170	113419	105313	102073	125837	111992	106935	1.12362	-1.04729	1.17676	0.696353	0.828228	0.828228	0.828228
Q02252	ALDH6A1	4329	Methylmalonate-semialdehyde dehydrogenase [acylating], mitochondrial [OS=Homo sapiens]	cellular homeostasis;metabolic process	58635.7	54425.6	58227.3	78016.2	92969	49053.1	31579.1	26577.2	44974.3	57096.2	73346.1	34376.8	-1.28461	-2.13359	1.66089	0.0396013	0.207115	0.0439864	0.143163
Q9UKL0	RCOR1	23186	REST corepressor 1 [OS=Homo sapiens]	cell organization and biogenesis;cellular homeostasis;defense response;metabolic process	132762	178377	136764	139056	75852	125742	135598	139509	134465	149301	113550	136524	1.31485	1.20232	1.09359	0.262929	0.360726	0.433344	0.541606
Q9NWU5	MRPL22	29093	39S ribosomal protein L22, mitochondrial [OS=Homo sapiens]	cell growth;cell organization and biogenesis;cellular homeostasis	60742.1	50259.1	52824.6	30727.4	20109.5	19534.8	36165.1	35571.4	32042.3	54608.6	23457.2	34592.9	2.32801	1.47472	1.57861	0.000745836	0.000779802	0.033921	0.00399508
P78318	IGBP1	3476	Immunoglobulin-binding protein 1 [OS=Homo sapiens]	development;metabolic process	56623.7	62720.2	66581	51417.4	53323.4	49497.4	68471.3	84929.7	72665.3	61975	51412.7	75355.4	1.20544	1.4657	-1.2159	0.00697379	0.0683485	0.00715008	0.0461152
Q92696	RABGGTA	5875	Geranylgeranyl transferase type-2 subunit alpha [OS=Homo sapiens]	cell organization and biogenesis;cellular homeostasis;metabolic process	15053.1	10186.2	11957.7	23052.2	28802.1	15412.5	25129.5	29802.7	28249.8	12399	22422.2	27727.4	-1.80839	1.2366	-2.23626	0.0135205	0.0455309	0.186155	0.0150698
Q92466	DDB2	1643	DNA damage-binding protein 2 [OS=Homo sapiens]	cell organization and biogenesis;cell proliferation;cellular homeostasis;coagulation;metabolic process	44044.9	40280.1	43584.8	48577.8	44015.3	33041	43538.1	45146.1	21179.3	42636.6	41878	36621.2	1.01811	-1.14355	1.16426	0.692857	0.92186	0.757502	0.757502
P35250	RFC2	5982	Replication factor C subunit 2 [OS=Homo sapiens]	cell growth;cell proliferation;cellular homeostasis;coagulation;metabolic process	152915	212179	153688	108581	79294	88277.4	192175	152793	177321	172927	92050.8	174096	1.87861	1.89131	-1.00676	0.00941191	0.00985622	0.00985622	0.954982
O43598	DNPH1	10591	2'-deoxynucleoside 5'-phosphate N-hydrolase 1 [OS=Homo sapiens]	cellular homeostasis;metabolic process	10236	11837.3	148603	4066.97	118706	197170	235217	168210	7733.2	56892.1	106648	137053	-1.87456	1.28511	-2.40901	0.629072	0.719753	0.719753	0.719753
Q9UL46	PSME2	5721	Proteasome activator complex subunit 2 [OS=Homo sapiens]	metabolic process	86298.5	160449	258769	164676	274680	332261	204522	214328	141946	168505	257206	186932	-1.52639	-1.37593	-1.10935	0.361474	0.430418	0.430418	0.76967
Q14790	CASP8	841	Caspase-8 [OS=Homo sapiens]	cell organization and biogenesis;cellular homeostasis;coagulation;defense response;development;metabolic process	9690.94	10668.4	9722.04	6024.07	5440.57	6046.88	10538.2	7891.53	6896.01	10027.1	5837.17	8441.92	1.71781	1.44623	1.18778	0.011887	0.01284	0.0484392	0.142451
Q96K76	USP47	55031	Ubiquitin carboxyl-terminal hydrolase 47 [OS=Homo sapiens]	cell organization and biogenesis;cell proliferation;cellular homeostasis;coagulation;metabolic process	10346.8	15518.2	8059.25	13088.8	12452.6	15293.9	13837.7	15762	11192.4	11308.1	13611.8	13597.3	-1.20372	-1.00106	-1.20244	0.526068	0.511981	0.995009	0.511981
Q14137	BOP1	23246	Ribosome biogenesis protein BOP1 [OS=Homo sapiens]	cell differentiation;cell growth;cellular component movement;cellular homeostasis;metabolic process	27293.8	60479.6	32770.6	43210.1	12613.4	30440.2	136507	101746	115148	40181.3	28754.6	117800	1.39739	4.09675	-2.93172	0.00128911	0.440113	0.00198792	0.00204371
Q8IXM3	MRPL41	64975	39S ribosomal protein L41, mitochondrial [OS=Homo sapiens]	cell differentiation;cell organization and biogenesis;cellular homeostasis;metabolic process	5058.14	4250.3	9009.12	4813.45	4936.9	4919.41	5023.14	4173.29	4376.46	6105.85	4889.92	4524.29	1.24866	-1.08081	1.34957	0.447268	0.535535	0.774337	0.535535
Q86Y82	STX12	23673	Syntaxin-12 [OS=Homo sapiens]	cell growth;cellular homeostasis;conjugation;metabolic process	141258	197928	164152	179724	189460	160884	145462	29677.2	161799	167779	176689	112313	-1.0531	-1.57319	1.49386	0.24991	0.818462	0.279119	0.279119
Q6IA86	ELP2	55250	Elongator complex protein 2 [OS=Homo sapiens]	cellular component movement;cellular homeostasis;metabolic process	25926.7	22680.3	21190	18653.8	14928.4	12476.2	22446.3	29329.4	19570	23265.7	15352.8	23781.9	1.5154	1.54903	-1.02219	0.0539977	0.0584772	0.0584772	0.869333
Q6UX04	CWC27	10283	Spliceosome-associated protein CWC27 homolog [OS=Homo sapiens]	cell organization and biogenesis;cellular component movement;cellular homeostasis;metabolic process	62841.2	62457.8	67500.9	44573.7	38850.1	37807.1	61756.1	66208.7	55608.3	64266.6	40410.3	61191	1.59035	1.51424	1.05026	0.000710047	0.00109496	0.00115043	0.389475
P10109	FDX1	2230	Adrenodoxin, mitochondrial [OS=Homo sapiens]	cellular homeostasis;metabolic process	159196	198541	142590	38486.9	80366.1	25258.8	121108	105400	106452	166775	48037.3	110987	3.47179	2.31043	1.50266	0.00277281	0.00275804	0.0275468	0.0293754
O43583	DENR	8562	Density-regulated protein [OS=Homo sapiens]	cell growth;cell organization and biogenesis;cellular homeostasis;metabolic process	8739.23	18696.8	57284.7	50687.6	90949.3	41366.4	85113.8	57238	75284.5	28240.2	61001.1	72545.4	-2.16008	1.18925	-2.56887	0.121096	0.19222	0.557023	0.162991
Q9H446	RWDD1	51389	RWD domain-containing protein 1 [OS=Homo sapiens]	cell organization and biogenesis;cellular homeostasis	52079.4	71611.7	59958.8	47743.4	42630.5	47751.2	77745.9	69915.4	54164.6	61216.6	46041.7	67275.3	1.32959	1.46118	-1.09897	0.0689771	0.131564	0.0873816	0.446946
Q9BVK8	TMEM147	10430	Transmembrane protein 147 [OS=Homo sapiens]		177270	124836	158182	144238	276695	166265	226794	190632	194074	153429	195733	203833	-1.27572	1.04139	-1.32852	0.39934	0.443594	0.833689	0.443594
P07947	YES1	7525	Tyrosine-protein kinase Yes [OS=Homo sapiens]	cell organization and biogenesis;cellular homeostasis;coagulation;conjugation;development;metabolic process	67260.5	79216.8	34161.3	14945.9	10557.2	6937.52	55219.9	27116.5	19232.5	60212.9	10813.6	33856.3	5.56828	3.13091	1.77848	0.0372144	0.0405318	0.157932	0.157932
Q93034	CUL5	8065	Cullin-5 [OS=Homo sapiens]	cell differentiation;cell organization and biogenesis;cellular homeostasis;conjugation;development	23746.6	28736.8	25887.8	23507.3	25760.6	19207.5	26976.6	21222.2	27560.9	26123.7	22825.2	25253.2	1.14451	1.10638	1.03447	0.459467	0.57078	0.57078	0.745964
Q99685	MGLL	11343	Monoglyceride lipase [OS=Homo sapiens]	cellular homeostasis;coagulation;metabolic process	27086.7	20153.2	25530.1	28150.4	35326.4	20550.5	19723.2	23144	17765.3	24256.7	28009.1	20210.8	-1.1547	-1.38585	1.20018	0.241207	0.394185	0.315388	0.394185
Q494V2	CFAP100	348807	Cilia- and flagella-associated protein 100 [OS=Homo sapiens]	cell growth;metabolic process	356912	205595	241399	2.06318e+06	6.58157e+06	3.20853e+06	3449691	1.60407e+06	5.50559e+06	267969	3.95109e+06	3.51978e+06	-14.7446	-1.12254	-13.135	0.0818453	0.0970894	0.774666	0.0970894
Q5GLZ8	HERC4	26091	Probable E3 ubiquitin-protein ligase HERC4 [OS=Homo sapiens]	cell organization and biogenesis;cellular homeostasis;metabolic process	10154	13390.4	10568.3	6859.16	8951.28	7112.73	9659.36	6902.07	9531.18	11370.9	7641.06	8697.54	1.48813	1.13826	1.30737	0.055349	0.0694601	0.423976	0.109531
Q9NU22	MDN1	23195	Midasin [OS=Homo sapiens]	cell growth;cellular component movement;cellular homeostasis	39092.4	62561.7	51405.2	30042.8	6519.2	12500.9	35253.9	30954.5	36031.4	51019.8	16354.3	34079.9	3.11965	2.08385	1.49706	0.0149635	0.0155629	0.0812564	0.0812564
Q9NQX3	GPHN	10243	Gephyrin [OS=Homo sapiens]	cell growth;cell organization and biogenesis;cellular homeostasis;metabolic process	72595.9	77989.2	72308.2	45750.8	53512.1	42580.3	75374.5	80973.5	70454.5	74297.7	47281.1	75600.8	1.57141	1.59897	-1.01754	0.000575615	0.000702597	0.000702597	0.751606
Q9P2I0	CPSF2	53981	Cleavage and polyadenylation specificity factor subunit 2 [OS=Homo sapiens]	cellular component movement;cellular homeostasis	86933.1	64868.8	87891.1	56794.1	4498.61	47967.5	84468.8	108424	66063.3	79897.6	36420.1	86318.8	2.19378	2.37009	-1.08037	0.0586378	0.0735817	0.0735817	0.728725
Q7L5L3	GDPD3	79153	Lysophospholipase D GDPD3 [OS=Homo sapiens]	cellular homeostasis	39816.3	51999.8	39637.4	63417.4	81346.7	61299.4	35991.5	35596.1	34741.6	43817.9	68687.8	35443.1	-1.56758	-1.93798	1.23629	0.00416198	0.0103969	0.00509478	0.224244
O94915	FRYL	285527	Protein furry homolog-like [OS=Homo sapiens]	cell growth;defense response;metabolic process	10097.9	9037.64	9165.79	6680.4	3944.5	5244.75	9809.23	7955.51	6393.6	9433.76	5289.88	8052.78	1.78336	1.5223	1.17149	0.021383	0.0244962	0.0620396	0.243489
Q9H2P9	DPH5	51611	Diphthine methyl ester synthase [OS=Homo sapiens]	cell organization and biogenesis;cellular homeostasis	13965.9	11781.9	14209.1	12890.3	12157.6	11343.4	16302.5	16716.9	14546.6	13319	12130.4	15855.3	1.09798	1.30707	-1.19043	0.0165388	0.238609	0.0190573	0.0472258
P24666	ACP1	52	Low molecular weight phosphotyrosine protein phosphatase [OS=Homo sapiens]	cell organization and biogenesis;cellular homeostasis	134297	124370	109565	249130	410565	254677	360523	322969	113803	122744	304790	265765	-2.48314	-1.14684	-2.1652	0.115929	0.163265	0.62747	0.165226
O15126	SCAMP1	9522	Secretory carrier-associated membrane protein 1 [OS=Homo sapiens]	conjugation	76378.3	167708	104816	103706	281045	188672	125632	65040.1	65798	116301	191141	85489.9	-1.64351	-2.23583	1.3604	0.175371	0.277871	0.237425	0.560552
Q12800	TFCP2	7024	Alpha-globin transcription factor CP2 [OS=Homo sapiens]	cellular component movement;cellular homeostasis;metabolic process	81098.2	75055.8	87179.2	68540.9	27879.5	58637.3	62221.3	68217.9	62907.8	81111.1	51685.9	64449	1.56931	1.24694	1.25853	0.080707	0.0935334	0.270237	0.245981
Q9H2P0	ADNP	23394	Activity-dependent neuroprotector homeobox protein [OS=Homo sapiens]	cell growth;defense response;development;metabolic process	41466.2	50652.2	40769.3	4565.95	22396	6155.11	30195.5	33587.1	32213	44295.9	11039	31998.5	4.01266	2.89867	1.38431	0.00237972	0.00249589	0.012128	0.0626443
Q9UK39	NOCT	25819	Nocturnin [OS=Homo sapiens]	cell growth;cellular component movement;cellular homeostasis;metabolic process	37167	28936.6	21169.3	77266.1	139722	78350.9	39848.1	30394.4	25544.8	29091	98446.3	31929.1	-3.38409	-3.08328	-1.09756	0.012465	0.0138034	0.0138034	0.877228
Q06033	ITIH3	3699	Inter-alpha-trypsin inhibitor heavy chain H3 [OS=Homo sapiens]	cellular homeostasis;metabolic process	46685.6	33270.5	30578.2	147304	384920	177663	189189	120931	261742	36844.8	236629	190621	-6.42233	-1.24136	-5.17362	0.0632821	0.0849154	0.532743	0.103487
Q9HBM6	TAF9B	51616	Transcription initiation factor TFIID subunit 9B [OS=Homo sapiens]	cellular component movement;cellular homeostasis;metabolic process	8893.21	17194.4	8731.03	8195.32	4081.16	6511.44	12925.5	12030.7	7360.57	11606.2	6262.64	10772.2	1.85324	1.72008	1.07742	0.212126	0.24761	0.24761	0.779916
Q9BTC8	MTA3	57504	Metastasis-associated protein MTA3 [OS=Homo sapiens]	cell organization and biogenesis;cellular homeostasis;metabolic process	48634.6	42643.2	40531.2	26587.7	14685.9	31036.9	32183.1	37943.3	35967.1	43936.3	24103.5	35364.5	1.82282	1.46719	1.24239	0.0151898	0.016029	0.0781442	0.115444
Q9H300	PARL	55486	Presenilins-associated rhomboid-like protein, mitochondrial [OS=Homo sapiens]	cell organization and biogenesis;cellular homeostasis;metabolic process	23327.7	26564.9	23660.7	24224.5	11793.3	28176.2	14592.5	15886.7	15844.5	24517.7	21398	15441.2	1.1458	-1.38577	1.58781	0.162988	0.478743	0.299139	0.211169
P09668	CTSH	1512	Pro-cathepsin H [OS=Homo sapiens]	cell organization and biogenesis;cellular homeostasis;defense response;development;metabolic process	355355	310097	292904	10557.8	59542	4197.65	10009.1	74625.5	77723.7	319452	24765.8	54119.4	12.8989	2.18525	5.90272	7.12832e-05	0.000107972	0.32791	0.000107972
Q9UNP9	PPIE	10450	Peptidyl-prolyl cis-trans isomerase E [OS=Homo sapiens]	cell organization and biogenesis;cellular component movement;cellular homeostasis;metabolic process	249350	139502	128439	125764	107669	121851	148683	258272	134464	172430	118428	180473	1.45599	1.52391	-1.04664	0.386099	0.41431	0.41431	0.864302
Q9BX95	SGPP1	81537	Sphingosine-1-phosphate phosphatase 1 [OS=Homo sapiens]	cellular homeostasis;conjugation;development;metabolic process	297204	422247	387951	149720	165050	126283	188470	201002	295625	369134	147017	228366	2.51082	1.55332	1.61641	0.00528	0.00563897	0.101729	0.0233841
Q96KP1	EXOC2	55770	Exocyst complex component 2 [OS=Homo sapiens]	conjugation;metabolic process	46000.1	43277.8	41648	34333.1	31475.1	31859.7	34627.9	31404.1	39476.5	43641.9	32556	35169.5	1.34052	1.08028	1.2409	0.00694206	0.00877165	0.298665	0.0153529
Q9UN86	G3BP2	9908	Ras GTPase-activating protein-binding protein 2 [OS=Homo sapiens]	cell growth;coagulation;conjugation;development;metabolic process	64637.8	7031.22	73620.3	15036.2	5336.01	17556.4	48167.6	55022.5	36609.6	48429.8	12642.9	46599.9	3.8306	3.68586	1.03927	0.157964	0.158733	0.158733	0.921689
Q96RF0	SNX18	112574	Sorting nexin-18 [OS=Homo sapiens]	cell differentiation;cell growth;conjugation;metabolic process	161893	126483	148391	139854	61095.8	84948.9	84414.8	110417	107196	145589	95299.5	100676	1.5277	1.05642	1.44612	0.113839	0.128627	0.813953	0.128627
Q9NVT9	ARMC1	55156	Armadillo repeat-containing protein 1 [OS=Homo sapiens]	cell growth	47176.6	13877	43204.2	34090.8	33855.5	32184.8	49667.5	58123.9	41229.3	34752.6	33377	49673.6	1.04121	1.48826	-1.42935	0.240636	0.889221	0.249054	0.249054
O95071	UBR5	51366	E3 ubiquitin-protein ligase UBR5 [OS=Homo sapiens]	cell organization and biogenesis;cell proliferation;cellular homeostasis;coagulation;development;metabolic process	36791.9	37292.6	30521.9	30830.2	14373.1	19798.1	42929.7	42599.6	23408	34868.8	21667.2	36312.4	1.60929	1.67592	-1.0414	0.138477	0.151732	0.151732	0.839432
Q14188	TFDP2	7029	Transcription factor Dp-2 [OS=Homo sapiens]	cell differentiation;defense response;metabolic process	17540.8	18063.6	17100.5	6101.46	2592.99	3281.04	14143.7	15947.4	11190.4	17568.3	3991.83	13760.5	4.40106	3.44717	1.27672	0.000220249	0.00025217	0.000780134	0.0392278
P42224	STAT1	6772	Signal transducer and activator of transcription 1-alpha/beta [OS=Homo sapiens]	cell differentiation;coagulation;defense response;development;metabolic process	406388	373487	383007	302807	422230	328009	359439	253588	345124	387627	351015	319384	1.1043	-1.09904	1.21367	0.318935	0.469208	0.469208	0.440054
O60218	AKR1B10	57016	Aldo-keto reductase family 1 member B10 [OS=Homo sapiens]	cellular homeostasis;metabolic process	4839.26	4544.82	5599.04	8215.21	12268.4	59163.6	7357.44	8564.6	8233.82	4994.37	26549.1	8051.95	-5.3158	-3.29722	-1.61221	0.291359	0.323	0.323	0.826512
P36955	SERPINF1	5176	Pigment epithelium-derived factor [OS=Homo sapiens]	defense response;metabolic process	9545.13	6379.41	8515.44	52803.6	295311	73208.5	57847.7	26717.4	157219	8146.66	140441	80594.7	-17.2391	-1.74256	-9.89298	0.254032	0.336212	0.432135	0.432135
O15460	P4HA2	8974	Prolyl 4-hydroxylase subunit alpha-2 [OS=Homo sapiens]	cell organization and biogenesis;cellular homeostasis	58524.4	27887.5	45288.3	178108	251262	203131	51251.5	100186	54643.3	43900.1	210833	68693.7	-4.80257	-3.06918	-1.56478	0.000694526	0.00102505	0.00121734	0.321028
Q8NDW8	TTC21A	199223	Tetratricopeptide repeat protein 21A [OS=Homo sapiens]	cell growth;conjugation;metabolic process	132857	48672.4	63234.4	1.07047e+06	2.95263e+06	1.32687e+06	1.0885e+06	595528	1.87291e+06	81587.9	1.78332e+06	1.18564e+06	-21.8577	-1.5041	-14.5321	0.061556	0.0730836	0.334293	0.150869
Q16555	DPYSL2	1808	Dihydropyrimidinase-related protein 2 [OS=Homo sapiens]	cell growth;cellular homeostasis;conjugation;defense response;development;metabolic process	56776.7	58859.4	74527.8	41916.7	6172.38	38540.4	57219.1	58351.9	49868.9	63388	28876.5	55146.6	2.19514	1.90974	1.14944	0.0397372	0.051853	0.0716824	0.466079
Q92692	NECTIN2	5819	Nectin-2 [OS=Homo sapiens]	cell communication;cell growth;metabolic process	250503	264160	222519	248027	366407	227439	193986	210984	238369	245727	280624	214446	-1.14201	-1.3086	1.14587	0.29635	0.444498	0.402489	0.444498
P55198	MLLT6	4302	Protein AF-17 [OS=Homo sapiens]	metabolic process	127172	263384	145620	100528	58596.2	85063.1	122823	102862	122742	178725	81395.8	116142	2.19576	1.42688	1.53885	0.0929121	0.113158	0.379623	0.207786
Q5T8P6	RBM26	64062	RNA-binding protein 26 [OS=Homo sapiens]	cellular component movement;cellular homeostasis	74541.2	93035.3	85367.7	80222.4	64101.6	73231	91191.9	73398.2	83272.9	84314.8	72518.3	82621	1.16267	1.13931	1.0205	0.280326	0.312503	0.312503	0.821047
Q14653	IRF3	3661	Interferon regulatory factor 3 [OS=Homo sapiens]	coagulation;development;metabolic process	12446.7	13977.9	11868.1	6941.93	13399.1	7827.66	15206.6	16060.8	12849.9	12764.2	9389.58	14705.8	1.3594	1.56618	-1.15211	0.0780967	0.188537	0.0933402	0.345752
Q8NEB9	PIK3C3	5289	Phosphatidylinositol 3-kinase catalytic subunit type 3 [OS=Homo sapiens]	cell differentiation;cell growth;cell organization and biogenesis;cellular homeostasis;coagulation;conjugation;development;metabolic process	7017.31	15028.3	10433.6	5746.35	7202.34	8166.92	11263.7	10532	7108.28	10826.4	7038.54	9634.65	1.53816	1.36884	1.12369	0.297049	0.425057	0.435551	0.61371
O95352	ATG7	10533	Ubiquitin-like modifier-activating enzyme ATG7 [OS=Homo sapiens]	cell growth;cell organization and biogenesis;cellular homeostasis;coagulation;conjugation;metabolic process	89819.1	94945.3	94265	70406.8	92288.1	90057.5	117624	118258	91797.3	93009.8	84250.8	109227	1.10396	1.29644	-1.17435	0.0859998	0.377702	0.104551	0.192496
O15042	U2SURP	23350	U2 snRNP-associated SURP motif-containing protein [OS=Homo sapiens]	cellular component movement;cellular homeostasis	144607	172520	177620	73470.8	26420.7	87463.9	151904	86530	77460.7	164916	62451.8	105298	2.64068	1.68607	1.56618	0.0204181	0.021942	0.147426	0.0899616
P36507	MAP2K2	5605	Dual specificity mitogen-activated protein kinase kinase 2 [OS=Homo sapiens]	cell organization and biogenesis;cellular homeostasis;development;metabolic process	162198	150580	148940	139076	153079	128113	158541	164458	160396	153906	140090	161132	1.09863	1.1502	-1.04695	0.058698	0.141538	0.0699021	0.339221
Q8NBM8	PCYOX1L	78991	Prenylcysteine oxidase-like [OS=Homo sapiens]	cell organization and biogenesis;cellular homeostasis	18351.6	16259.5	11421	13922.4	13864.4	20900.9	6449.15	6823.27	9547.76	15344	16229.3	7606.73	-1.05769	-2.13354	2.01716	0.0329843	0.750709	0.0406003	0.0406003
P56715	RP1	6101	Oxygen-regulated protein 1 [OS=Homo sapiens]	cell growth;defense response;development;metabolic process	12754.2	13537.3	12544.9	3805.79	6320.2	10276.7	11902.3	14976.8	12964.8	12945.5	6800.88	13281.3	1.9035	1.95288	-1.02594	0.0157369	0.0177393	0.0177393	0.851861
P50613	CDK7	1022	Cyclin-dependent kinase 7 [OS=Homo sapiens]	cell differentiation;cell organization and biogenesis;cell proliferation;cellular component movement;cellular homeostasis;coagulation;metabolic process	64662.5	61659.3	58804.8	13717.4	21423.3	20000.3	65292.3	62392.3	52866.6	61708.8	18380.3	60183.7	3.35733	3.27435	1.02534	4.65037e-05	5.64818e-05	5.64818e-05	0.707658
O75818	RPP40	10799	Ribonuclease P protein subunit p40 [OS=Homo sapiens]	cellular component movement;cellular homeostasis	23694.6	26365.2	22536.9	13885.9	12186.5	11089.4	24665.2	21594.3	19439.7	24198.9	12387.2	21899.8	1.95353	1.76793	1.10498	0.00093217	0.00125004	0.0019707	0.220737
Q9NP73	ALG13	79868	Putative bifunctional UDP-N-acetylglucosamine transferase and deubiquitinase ALG13 [OS=Homo sapiens]	cell organization and biogenesis	32056.8	126453	56208.3	58289	19976.6	65903.4	84131.1	42171	58303.4	71572.8	48056.3	61535.2	1.48935	1.28048	1.16312	0.710293	0.729712	0.729712	0.729712
Q9UKN8	GTF3C4	9329	General transcription factor 3C polypeptide 4 [OS=Homo sapiens]	cell organization and biogenesis;cellular component movement;cellular homeostasis	143936	191973	189775	94398.9	23386.4	21534.4	177584	187556	151308	175228	46439.9	172149	3.77322	3.70692	1.01789	0.00323636	0.00357508	0.00357508	0.905992
P0C0L4	C4A	720; 721	Complement C4-A [OS=Homo sapiens]	coagulation;metabolic process	28421.3	9975.76	29205.4	168304	687827	264449	355697	339769	363129	22534.2	373527	352865	-16.576	-1.05855	-15.6591	0.0626369	0.0669403	0.879415	0.0669403
Q15057	ACAP2	23527	Arf-GAP with coiled-coil, ANK repeat and PH domain-containing protein 2 [OS=Homo sapiens]	conjugation;metabolic process	42852.4	53788	50239.9	51257.1	42121.3	34847.8	53894.2	54309.5	43406.6	48960.1	42742.1	50536.8	1.14548	1.18237	-1.0322	0.387041	0.45398	0.45398	0.784606
Q5H9R7	PPP6R3	55291	Serine/threonine-protein phosphatase 6 regulatory subunit 3 [OS=Homo sapiens]	metabolic process	137715	185866	150650	115413	136125	86218	162621	165332	178880	158077	112585	168944	1.40406	1.50059	-1.06875	0.0361867	0.0569978	0.0502294	0.549963
P48147	PREP	5550	Prolyl endopeptidase [OS=Homo sapiens]	cell organization and biogenesis	52125.9	47634.4	61362.6	60526.8	68612.6	65213.1	54989.5	66066.5	60437.9	53707.6	64784.2	60498	-1.20624	-1.07085	-1.12643	0.130144	0.160707	0.389573	0.288337
Q96RT1	ERBIN	55914	Erbin [OS=Homo sapiens]	cell communication;cell growth;conjugation;development;metabolic process	11781.2	16288.7	9576.55	16980.1	14415.3	7603.76	12210.9	11008	10573.3	12548.8	12999.7	11264.1	-1.03594	-1.15409	1.11406	0.821433	0.878404	0.878404	0.878404
P14859	POU2F1	5451	POU domain, class 2, transcription factor 1 [OS=Homo sapiens]	metabolic process	48801.2	24106.7	62861.4	18591.9	41970.1	16282.5	16383.8	12281.9	53333.7	45256.4	25614.8	27333.1	1.76681	1.06708	1.65573	0.431559	0.442365	0.915997	0.442365
Q8TBC4	UBA3	9039	NEDD8-activating enzyme E1 catalytic subunit [OS=Homo sapiens]	cell differentiation;cell organization and biogenesis;cellular homeostasis;metabolic process	350800	245480	289642	267912	364413	190786	321559	335651	219152	295307	274370	292121	1.07631	1.0647	1.01091	0.924537	0.956918	0.956918	0.956918
Q8WZA0	LZIC	84328	Protein LZIC [OS=Homo sapiens]	metabolic process	5781.5	5949.29	6043.36	9424.43	16815.6	15370.6	12703.5	7080.28	7196.76	5924.71	13870.2	8993.53	-2.34108	-1.54224	-1.51797	0.0420867	0.047691	0.130979	0.246367
O00233	PSMD9	5715	26S proteasome non-ATPase regulatory subunit 9 [OS=Homo sapiens]	cell growth;cell organization and biogenesis;cellular homeostasis;metabolic process	138724	149639	160743	140195	182792	160666	181287	183236	141891	149702	161218	168805	-1.07692	1.04706	-1.1276	0.514519	0.647518	0.647518	0.647518
Q9BXP2	SLC12A9	56996	Solute carrier family 12 member 9 [OS=Homo sapiens]	cell growth;conjugation;metabolic process	175082	173142	155066	79762.3	61586.4	67513.5	108503	105219	91316.2	167763	69620.7	101679	2.40967	1.46048	1.64992	5.18515e-05	5.52559e-05	0.00722967	0.000262918
Q05397	PTK2	5747	Focal adhesion kinase 1 [OS=Homo sapiens]	cell growth;cell organization and biogenesis;cellular homeostasis;coagulation;conjugation;defense response;development;metabolic process	161267	119918	146179	143867	139855	125390	91762.2	116829	89003.6	142455	136371	99198.3	1.04461	-1.37473	1.43606	0.0321867	0.657712	0.0439663	0.0439663
P82094	TMF1	7110	TATA element modulatory factor [OS=Homo sapiens]	cell death;cell growth;coagulation;conjugation;defense response;development;metabolic process	10068.4	7805.69	9465.92	6663.29	7919.11	6189.69	7629.68	8541.33	6217.79	9113.33	6924.03	7462.93	1.31619	1.07783	1.22115	0.107679	0.145865	0.56586	0.168306
Q7Z4Q2	HEATR3	55027	HEAT repeat-containing protein 3 [OS=Homo sapiens]	conjugation;metabolic process	32898.6	38236.7	27275	19418.6	20308.8	17675.9	50964.1	44529.7	33707.1	32803.5	19134.4	43067	1.71437	2.25076	-1.31288	0.00796037	0.0472705	0.00823529	0.0809185
Q00535	CDK5	1020	Cyclin-dependent-like kinase 5 [OS=Homo sapiens]	cell communication;cell death;cell differentiation;cell growth;cell organization and biogenesis;cellular homeostasis;coagulation;conjugation;defense response;development;metabolic process	20372.4	19357.7	18027.5	12529.3	14293.2	14077	15083.8	19066.6	16158.1	19252.6	13633.2	16769.5	1.41218	1.23005	1.14807	0.0100783	0.0104441	0.0611007	0.0853584
Q07157	TJP1	7082	Tight junction protein ZO-1 [OS=Homo sapiens]	cell communication;cell growth;metabolic process	20310.5	44805.5	17390	5412.16	3075.4	5513.58	18464.3	11274.2	23021.9	27502	4667.05	17586.8	5.8928	3.7683	1.56378	0.0646384	0.0736108	0.213619	0.242816
Q9NRN7	AASDHPPT	60496	L-aminoadipate-semialdehyde dehydrogenase-phosphopantetheinyl transferase [OS=Homo sapiens]	cell organization and biogenesis;cellular homeostasis	14061.5	12861.9	14328.9	15572.3	24272	10690.7	21265.1	21230.5	14699.5	13750.8	16845	19065	-1.22502	1.13179	-1.38647	0.412443	0.572344	0.572344	0.572344
O94919	ENDOD1	23052	Endonuclease domain-containing 1 protein [OS=Homo sapiens]	cellular homeostasis	9683.33	15217.7	5249.88	20270.1	26570.3	11865.1	15898.1	5542.18	17519.2	10050.3	19568.5	12986.5	-1.94705	-1.50684	-1.29215	0.250594	0.350434	0.37855	0.592648
Q9Y263	PLAA	9373	Phospholipase A-2-activating protein [OS=Homo sapiens]	cell organization and biogenesis;cellular homeostasis;coagulation;defense response;development;metabolic process	802458	734052	707621	494277	509696	491453	669956	797384	774633	748043	498475	747324	1.50066	1.49922	1.00096	0.00108415	0.00115653	0.00115653	0.986153
P02749	APOH	350	Beta-2-glycoprotein 1 [OS=Homo sapiens]	cell organization and biogenesis;cellular homeostasis;coagulation;conjugation;metabolic process	58338.6	29539.2	29470.3	209815	581319	190957	112468	83715.8	170148	39116	327364	122111	-8.36904	-2.68088	-3.12175	0.0818176	0.104437	0.151875	0.463889
O95477	ABCA1	19	Phospholipid-transporting ATPase ABCA1 [OS=Homo sapiens]	cell death;cell growth;cell organization and biogenesis;cellular homeostasis;coagulation;conjugation;development;metabolic process	135785	152819	114397	688579	2.59199e+06	807804	732734	308108	1.09493e+06	134333	1.36279e+06	711924	-10.1448	-1.91424	-5.29968	0.151238	0.185211	0.322516	0.322516
P01008	SERPINC1	462	Antithrombin-III [OS=Homo sapiens]	coagulation;conjugation;defense response;metabolic process	285148	323133	253898	1.58535e+06	2.99421e+06	1.93479e+06	1.24867e+06	585270	1.57415e+06	287393	2.17145e+06	1.13603e+06	-7.55567	-1.91144	-3.95288	0.0120122	0.0124845	0.0730936	0.0897696
O75347	TBCA	6902	Tubulin-specific chaperone A [OS=Homo sapiens]	cell growth;metabolic process	89577.8	110389	138330	310194	690046	670207	476869	344604	512286	112766	556816	444586	-4.93781	-1.25244	-3.94257	0.0161638	0.0202026	0.345626	0.0348432
P68871	HBB	3043	Hemoglobin subunit beta [OS=Homo sapiens]	cellular homeostasis;coagulation;conjugation;metabolic process	301176	228553	223591	2.03197e+06	2.76884e+06	3.51037e+06	2.3488e+06	2.13591e+06	2.36432e+06	251106	2.77039e+06	2.28301e+06	-11.0327	-1.21348	-9.09181	0.000866995	0.00116515	0.217986	0.00182898
Q9NSK7	C19orf12	83636	Protein C19orf12 [OS=Homo sapiens]	cellular homeostasis;coagulation;metabolic process	14453.7	7401.71	11244.7	49082.8	193050	48269	66107.1	44762.1	100070	11033.4	96800.5	70313.1	-8.77343	-1.37671	-6.37276	0.187339	0.252284	0.546594	0.304198
O60512	B4GALT3	8703	Beta-1,4-galactosyltransferase 3 [OS=Homo sapiens]	cell organization and biogenesis;cellular homeostasis	8232.79	10572.6	5703.68	39806.7	81902	28356.9	22003.4	6983.71	33119.6	8169.68	50021.9	20702.2	-6.12287	-2.41625	-2.53403	0.0703354	0.0879803	0.139812	0.426756
P04004	VTN	7448	Vitronectin [OS=Homo sapiens]	cell communication;conjugation;defense response;metabolic process	17472.9	10855.1	12775	230844	151039	279768	89854.8	67145.4	90767.5	13701	220550	82589.2	-16.0974	-2.67045	-6.02796	0.00160438	0.00173746	0.0068117	0.0701193
Q9NVA2	SEPTIN11	55752	Septin-11 [OS=Homo sapiens]	cell differentiation;metabolic process	4.12252e+06	4.54859e+06	3.91015e+06	9.36463e+06	2.04991e+07	1.08347e+07	1.26511e+07	7.51112e+06	1.61046e+07	4.19375e+06	1.35661e+07	1.20889e+07	-3.23484	-1.12219	-2.88261	0.0746267	0.0981242	0.688401	0.0981242
Q6MZP7	LIN54	132660	Protein lin-54 homolog [OS=Homo sapiens]	cell differentiation;cell growth;metabolic process	35709.2	25732.6	26448	86168.2	181837	132431	94328.7	91783.1	110090	29296.6	133478	98734.1	-4.5561	-1.3519	-3.37015	0.0110425	0.0123887	0.184586	0.0362283
Q9H2D6	TRIOBP	11078	TRIO and F-actin-binding protein [OS=Homo sapiens]	cell differentiation;cell growth;cell organization and biogenesis;cellular homeostasis;defense response;metabolic process	38273.4	29513.4	29579.3	93300.4	188719	116809	105821	96754.8	129593	32455.4	132943	110723	-4.09617	-1.20068	-3.41154	0.0156025	0.0204149	0.406118	0.0298564
Q96NY8	NECTIN4	81607	Nectin-4 [OS=Homo sapiens]	cell communication;metabolic process	21188	62178	55454.6	489019	714442	666115	551463	511856	606459	46273.5	623192	556593	-13.4676	-1.11966	-12.0283	0.000151437	0.000241185	0.31789	0.000241185
Q2NL82	TSR1	55720	Pre-rRNA-processing protein TSR1 homolog [OS=Homo sapiens]	cellular component movement;cellular homeostasis	258403	276498	261709	409167	723670	406943	487901	376169	575011	265536	513260	479693	-1.93292	-1.06997	-1.80651	0.0874227	0.107366	0.743688	0.107366
Q9Y3F4	STRAP	11171	Serine-threonine kinase receptor-associated protein [OS=Homo sapiens]	cell growth;cellular component movement;cellular homeostasis;defense response;metabolic process	8.06576e+06	7.31128e+06	6.71638e+06	1.42838e+07	2.62787e+07	1.5618e+07	1.89198e+07	1.59201e+07	2.40404e+07	7.36447e+06	1.87269e+07	1.96267e+07	-2.54286	1.04805	-2.66506	0.0274504	0.0317582	0.814361	0.0317582
P69905	HBA1; HBA2	3039; 3040	Hemoglobin subunit alpha [OS=Homo sapiens]	cellular homeostasis;coagulation;conjugation;metabolic process	3.15233e+06	2.7308e+06	2902704	8.97266e+06	1.54571e+07	1.33511e+07	9.50417e+06	8.96301e+06	1.12915e+07	2.92861e+06	1.25936e+07	9.91956e+06	-4.3002	-1.26957	-3.38712	0.00292692	0.00343735	0.159346	0.00853566
P06396	GSN	2934	Gelsolin [OS=Homo sapiens]	cell growth;cell organization and biogenesis;cellular homeostasis;conjugation;defense response;metabolic process	411774	380684	464561	3.96609e+06	4.95509e+06	3.86651e+06	1.1817e+06	1.11604e+06	1.42972e+06	419006	4.26256e+06	1.24249e+06	-10.173	-3.43067	-2.96532	2.9417e-05	3.77118e-05	7.58339e-05	0.0314769
P23378	GLDC	2731	Glycine dehydrogenase (decarboxylating), mitochondrial [OS=Homo sapiens]	cell growth;cellular homeostasis;metabolic process	4.87378e+06	4.73424e+06	4.51747e+06	4.70974e+06	9.90447e+06	5.60438e+06	5.03329e+06	4.28956e+06	7.1457e+06	4.7085e+06	6.73953e+06	5.48952e+06	-1.43136	-1.22771	-1.16588	0.437999	0.618086	0.618086	0.618086
P00747	PLG	5340	Plasminogen [OS=Homo sapiens]	cell growth;cell organization and biogenesis;coagulation;metabolic process	15694.7	18780.8	23122.1	29125.6	110366	25396.8	33759.3	27523.3	38978.2	19199.2	54962.8	33420.3	-2.86276	-1.64459	-1.74071	0.354105	0.506419	0.556831	0.556831
P24386	CHM	1121	Rab proteins geranylgeranyltransferase component A 1 [OS=Homo sapiens]	cell organization and biogenesis;cellular homeostasis;conjugation;development;metabolic process	76926.1	21035.4	7321.02	143974	25478.9	11450.3	22685.1	93038.8	56785.6	35094.2	60301.2	57503.1	-1.71827	-1.04866	-1.63854	0.810564	0.91791	0.948918	0.91791
P12109	COL6A1	1291	Collagen alpha-1(VI) chain [OS=Homo sapiens]	cell communication;defense response;metabolic process	35309	35803.5	34391.2	40877.4	44702.7	48851.7	45494.4	26404.5	53726.5	35167.9	44810.6	41875.2	-1.27419	-1.0701	-1.19072	0.411619	0.550676	0.684414	0.550676
P34932	HSPA4	3308	Heat shock 70 kDa protein 4 [OS=Homo sapiens]	cell growth;coagulation;conjugation	1.08411e+07	1.32821e+07	1.07051e+07	1.50654e+07	3.36144e+07	1.49313e+07	1.94126e+07	1.3367e+07	2.37076e+07	1.16094e+07	2.12037e+07	1.88291e+07	-1.82642	-1.12611	-1.62188	0.285896	0.3749	0.68988	0.3749
O00178	GTPBP1	9567	GTP-binding protein 1 [OS=Homo sapiens]	cell organization and biogenesis;cellular homeostasis;development;metabolic process	75454.6	80880.2	99041.2	43676.3	54245.6	39758.6	192157	125684	101002	85125.4	45893.5	139614	1.85485	3.04214	-1.6401	0.0192205	0.142432	0.0205986	0.0862833
P49368	CCT3	7203	T-complex protein 1 subunit gamma [OS=Homo sapiens]	cell growth;conjugation;metabolic process	1.65691e+07	1.58393e+07	1.59638e+07	2.47126e+07	3.36988e+07	2.35513e+07	2.69689e+07	2.5549e+07	3.26388e+07	1.61241e+07	2.73209e+07	2.83855e+07	-1.69442	1.03897	-1.76044	0.0148181	0.0183724	0.748017	0.0183724
O43395	PRPF3	9129	U4/U6 small nuclear ribonucleoprotein Prp3 [OS=Homo sapiens]	cell growth;cellular component movement;cellular homeostasis	76657.2	94398	105606	106299	107090	79606.2	132421	102657	165002	92220.5	97665	133360	-1.05904	1.36549	-1.4461	0.116502	0.770381	0.138209	0.138209
Q6NYC1	JMJD6	23210	Bifunctional arginine demethylase and lysyl-hydroxylase JMJD6 [OS=Homo sapiens]	cell growth;cell organization and biogenesis;cellular component movement;cellular homeostasis;conjugation;defense response;development;metabolic process	42895.9	48763.8	40293	44038.3	49866.8	40217.9	58620.4	52890.1	58802.3	43984.2	44707.7	56770.9	-1.01645	1.26982	-1.29071	0.0171213	0.841101	0.0194586	0.0194586
P54760	EPHB4	2050	Ephrin type-B receptor 4 [OS=Homo sapiens]	cell communication;cell growth;cell organization and biogenesis;cellular homeostasis;defense response;development;metabolic process	17695.6	21479.4	17726	15477.7	20109.2	19130	30256.2	23386.6	19247.3	18967	18238.9	24296.7	1.03992	1.33213	-1.281	0.174765	0.818751	0.195317	0.195317
Q02413	DSG1	1828	Desmoglein-1 [OS=Homo sapiens]	cell communication;cell growth;metabolic process	16711.9	27915.3	64169	122879	4201.96	114084	11785	16970.4	132442	36265.4	80388.4	53732.6	-2.21667	-1.49608	-1.48165	0.651316	0.718888	0.718888	0.718888
Q96C23	GALM	130589	Galactose mutarotase [OS=Homo sapiens]	cellular homeostasis	753101	595721	1.23637e+06	2.06622e+06	1.15557e+06	1.75249e+06	385218	607966	1.35847e+06	861731	1.65809e+06	783884	-1.92414	-2.11523	1.09931	0.0939855	0.104028	0.104028	0.836278
P02647	APOA1	335	Apolipoprotein A-I [OS=Homo sapiens]	cell differentiation;cell growth;cell organization and biogenesis;cellular homeostasis;coagulation;conjugation;defense response;development;metabolic process	30660.1	27428.7	27019.9	65130.5	155870	81178.6	68933.2	53987.5	78342.9	28369.6	100726	67087.9	-3.55051	-1.50141	-2.36478	0.058683	0.0658315	0.203426	0.203426
Q96C36	PYCR2	29920	Pyrroline-5-carboxylate reductase 2 [OS=Homo sapiens]	cellular homeostasis;coagulation	837351	813799	785135	690766	780461	624479	525774	558614	693198	812095	698569	592529	1.16251	-1.17896	1.37056	0.0240678	0.112782	0.112782	0.0255605
P35908	KRT2	3849	Keratin, type II cytoskeletal 2 epidermal [OS=Homo sapiens]	cell differentiation;cell growth;cell organization and biogenesis;cellular homeostasis;defense response;metabolic process	1.89307e+07	1.54297e+07	3.28371e+07	4.68505e+07	1.89286e+07	4.89732e+07	1.18495e+07	1.96832e+07	3.60104e+07	2.23992e+07	3.82508e+07	2.25144e+07	-1.70769	-1.69895	-1.00514	0.307405	0.289149	0.289149	0.991782
O75165	DNAJC13	23317	DnaJ homolog subfamily C member 13 [OS=Homo sapiens]	cell growth;conjugation;metabolic process	90956.4	108911	107375	101985	133505	72419.5	106350	99963.2	143775	102414	102636	116696	-1.00217	1.13699	-1.13945	0.700219	0.990966	0.7246	0.7246
Q8TDC3	BRSK1	84446	Serine/threonine-protein kinase BRSK1 [OS=Homo sapiens]	cell death;cell differentiation;cell growth;cell organization and biogenesis;cellular homeostasis;coagulation;conjugation;defense response;development;metabolic process	239829	72360.1	172516	97235.3	73601.7	222439	111403	159610	118492	161568	131092	129835	1.23248	-1.00968	1.24441	0.820131	0.910068	0.982856	0.910068
P04264	KRT1	3848	Keratin, type II cytoskeletal 1 [OS=Homo sapiens]	cell growth;cell organization and biogenesis;cellular homeostasis;coagulation;defense response;metabolic process	6.69416e+07	6.72944e+07	1.38265e+08	1.07163e+08	4.0438e+07	9.71058e+07	4.96717e+07	5.22466e+07	1.53795e+08	9.08337e+07	8.1569e+07	8.52379e+07	1.11358	1.04498	1.06565	0.970492	0.926285	0.926285	0.926285
P02538	KRT6A	3853	Keratin, type II cytoskeletal 6A [OS=Homo sapiens]	cell growth;coagulation;metabolic process	753879	927251	5.53877e+06	1.31904e+06	194027	918436	2.38657e+06	286579	9.06196e+06	2.40663e+06	810502	3.9117e+06	2.96931	4.82627	-1.62538	0.510142	0.572892	0.572892	0.572892
Q5D862	FLG2	388698	Filaggrin-2 [OS=Homo sapiens]	cell communication;defense response;metabolic process	102172	65760.6	204894	122064	40457.6	174166	32919.4	70544.9	118723	124276	112229	74062.5	1.10734	-1.51533	1.67799	0.612115	0.820324	0.720919	0.720919
P35527	KRT9	3857	Keratin, type I cytoskeletal 9 [OS=Homo sapiens]	cell growth;defense response;metabolic process	2.43637e+07	3.27598e+07	4.83441e+07	4.05126e+07	2.08774e+07	2.3842e+07	2.18977e+07	1.74528e+07	6.40945e+07	3.51559e+07	2.84107e+07	3.44817e+07	1.23742	1.21369	1.01955	0.876619	0.963975	0.963975	0.963975
Q5TCS8	AK9	221264	Adenylate kinase 9 [OS=Homo sapiens]	cellular homeostasis	541394	674790	713615	852043	765949	589493	368424	417663	463620	643266	735828	416569	-1.14389	-1.7664	1.5442	0.0174403	0.287725	0.0208061	0.043395
P13647	KRT5	3852	Keratin, type II cytoskeletal 5 [OS=Homo sapiens]	cell growth;metabolic process	3.00859e+06	3.53652e+06	8.89062e+06	7.66499e+06	2.13783e+06	5.5865e+06	3.17174e+06	2.02371e+06	1.24272e+07	5.14524e+06	5.12977e+06	5.87423e+06	1.00302	1.14512	-1.14168	0.968683	0.99648	0.99648	0.99648
Q92973	TNPO1	3842	Transportin-1 [OS=Homo sapiens]	conjugation	5.66499e+06	4.19876e+06	4.75521e+06	4.84284e+06	4.71033e+06	6.80484e+06	5.17944e+06	5.49794e+06	5.4748e+06	4.87299e+06	5.45267e+06	5.38406e+06	-1.11896	-1.01274	-1.10488	0.650801	0.701357	0.92049	0.701357
P47897	QARS1	5859	Glutamine--tRNA ligase [OS=Homo sapiens]	cell organization and biogenesis;cellular component movement;cellular homeostasis;defense response;metabolic process	4.35459e+08	4.59589e+08	4.23311e+08	3.94336e+08	4.1613e+08	456606301	3.97303e+08	4.02176e+08	4.1231e+08	4.39453e+08	4.22358e+08	4.0393e+08	1.04048	-1.04562	1.08794	0.211936	0.36956	0.36956	0.271447
P02771	AFP	174	Alpha-fetoprotein [OS=Homo sapiens]	cellular homeostasis;defense response;development	4.01915e+06	5.37755e+06	4.11075e+06	5.94423e+06	9.76679e+06	6.02038e+06	5.17221e+06	5.09621e+06	5.97677e+06	4.50248e+06	7.2438e+06	5.41506e+06	-1.60884	-1.33771	-1.20268	0.116795	0.147446	0.227929	0.444206
Q8NEZ4	KMT2C	58508	Histone-lysine N-methyltransferase 2C [OS=Homo sapiens]	cell organization and biogenesis;cellular homeostasis;metabolic process	265459	62955.2	230856	156786	152688	277943	156503	223999	108687	186423	195806	163063	-1.05033	-1.2008	1.14326	0.883072	0.893092	0.893092	0.893092
Q15842	KCNJ8	3764	ATP-sensitive inward rectifier potassium channel 8 [OS=Homo sapiens]	coagulation;conjugation;defense response;metabolic process	90107.6	54630.5	83140.3	55453.8	48698.7	83633.3	51326.4	71836	73214.5	75959.4	62595.3	65458.9	1.2135	1.04575	1.16041	0.615852	0.709589	0.841562	0.709589
P13645	KRT10	3858	Keratin, type I cytoskeletal 10 [OS=Homo sapiens]	cell growth;cell organization and biogenesis;cellular homeostasis;defense response;metabolic process	6.94528e+07	4.64009e+07	1.12091e+08	1.15483e+08	3.97511e+07	1.13132e+08	3.65739e+07	4.87806e+07	1.0428e+08	7.59817e+07	8.94551e+07	6.32115e+07	-1.17732	-1.41517	1.20202	0.70973	0.692785	0.692785	0.692785
P19827	ITIH1	3697	Inter-alpha-trypsin inhibitor heavy chain H1 [OS=Homo sapiens]	cellular homeostasis;metabolic process	244122	218257	256685	171320	115964	131833	151625	162779	154810	239688	139706	156405	1.71566	1.11953	1.53249	0.00195362	0.00277325	0.351363	0.00354063
P80297	MT1X	4501	Metallothionein-1X [OS=Homo sapiens]	coagulation;metabolic process	63073.3	28143	43969.4	13998.3	75834.1	29838.6	54951.9	73685.6	33517.1	45061.9	39890.3	54051.5	1.12964	1.355	-1.1995	0.775482	0.801438	0.801438	0.801438
Q5JWR5	DOP1A	23033	Protein dopey-1 [OS=Homo sapiens]	conjugation	1.2132e+06	907204	1.22068e+06	826401	1.25077e+06	933426	1.13656e+06	1.38455e+06	1.04795e+06	1.1137e+06	1.00353e+06	1.18969e+06	1.10978	1.1855	-1.06823	0.528993	0.645856	0.645856	0.645856
Q13617	CUL2	8453	Cullin-2 [OS=Homo sapiens]	cell differentiation;cell organization and biogenesis;cellular homeostasis;development	223089	217280	245981	223596	278321	162087	276605	262478	274199	228783	221335	271094	1.03365	1.22481	-1.18494	0.249258	0.80292	0.283349	0.283349
P27816	MAP4	4134	Microtubule-associated protein 4 [OS=Homo sapiens]	cell differentiation;cell growth;defense response;metabolic process	1008159012	9.37868e+08	1026798999	8.66387e+08	1030766989	1098649766	9.62706e+08	9.88753e+08	9.37625e+08	9.90942e+08	9.98601e+08	9.63028e+08	-1.00773	-1.03694	1.02899	0.836198	0.905217	0.905217	0.905217
P07477	PRSS1	5644	Trypsin-1 [OS=Homo sapiens]	cell growth;cell organization and biogenesis;metabolic process	200334	363998	231847	209611	296600	228004	247216	193445	260950	265393	244738	233870	1.0844	-1.04647	1.13479	0.81522	0.832671	0.832671	0.832671
Q63ZY3	KANK2	25959	KN motif and ankyrin repeat domain-containing protein 2 [OS=Homo sapiens]	defense response;metabolic process	149663	151214	146571	127104	117323	108500	152914	126570	160232	149149	117642	146572	1.26782	1.24591	1.01758	0.0287745	0.0338973	0.0338973	0.79515
O43852	CALU	813	Calumenin [OS=Homo sapiens]		1.90419e+06	2.74996e+06	1.90918e+06	3.00122e+06	4.34129e+06	2.57226e+06	2.32361e+06	2.00702e+06	2.32405e+06	2.18778e+06	3.30492e+06	2.21823e+06	-1.51063	-1.48989	-1.01392	0.11068	0.108652	0.108652	0.953354
P02533	KRT14	3861	Keratin, type I cytoskeletal 14 [OS=Homo sapiens]	cell growth;metabolic process	1.11204e+06	1.76632e+06	4.71823e+06	2.93304e+06	712859	2.02714e+06	1.86378e+06	708906	7.48632e+06	2.5322e+06	1.89101e+06	3.353e+06	1.33907	1.77312	-1.32415	0.774118	0.75993	0.75993	0.75993
Q96CB9	NSUN4	387338	5-methylcytosine rRNA methyltransferase NSUN4 [OS=Homo sapiens]	cellular component movement;cellular homeostasis	2.15095e+06	2.26326e+06	2.94585e+06	3.79502e+06	4.60144e+06	2.81372e+06	1.96862e+06	2.14585e+06	2.2438e+06	2.45335e+06	3.73673e+06	2.11942e+06	-1.52311	-1.76309	1.15756	0.0312749	0.0523624	0.042406	0.506527
O95630	STAMBP	10617	STAM-binding protein [OS=Homo sapiens]	cell differentiation;cell organization and biogenesis;cellular homeostasis;development;metabolic process	91954.9	119375	229421	100492	55522.6	153705	83676.6	72841	118717	146917	103240	91744.9	1.42307	-1.12529	1.60137	0.448041	0.521932	0.797738	0.521932
Q9BY84	DUSP16	80824	Dual specificity protein phosphatase 16 [OS=Homo sapiens]	cell organization and biogenesis;cellular homeostasis;conjugation	213498	183814	157828	157432	209780	204985	147105	139422	149176	185046	190733	145234	-1.03073	-1.31327	1.27412	0.104304	0.775846	0.123143	0.123143
O43399	TPD52L2	7165	Tumor protein D54 [OS=Homo sapiens]	cellular homeostasis;metabolic process	303677	277940	334071	337381	426506	462096	387509	398004	457728	305229	408661	414414	-1.33886	1.01408	-1.35771	0.0463814	0.0497327	0.883316	0.0497327
Q96AQ6	PBXIP1	57326	Pre-B-cell leukemia transcription factor-interacting protein 1 [OS=Homo sapiens]	cell communication;cell growth;cell organization and biogenesis;cellular homeostasis;coagulation;defense response;metabolic process	39246	31318.7	29506.5	4397.68	40851.4	10304.3	42084.5	7662.84	34096.5	33357.1	18517.8	27947.9	1.80135	1.50925	1.19354	0.536802	0.686712	0.686712	0.686712
A6NDU8	C5orf51	285636	UPF0600 protein C5orf51 [OS=Homo sapiens]		36909	19495.2	12174.7	10184.3	23881	14869.5	20336.1	14934.9	17817	22859.6	16311.6	17696	1.40143	1.08487	1.2918	0.633271	0.728113	0.848636	0.728113
P61019	RAB2A	5862	Ras-related protein Rab-2A [OS=Homo sapiens]	cell growth;conjugation	5.03148e+06	4.52525e+06	4.55467e+06	5.07997e+06	6.07962e+06	4.68082e+06	3.3172e+06	3.91114e+06	4.69251e+06	4.7038e+06	5.28014e+06	3.97362e+06	-1.12253	-1.3288	1.18376	0.0944823	0.283118	0.110759	0.278913
Q86YZ3	HRNR	388697	Hornerin [OS=Homo sapiens]	cell growth;defense response	120730	89280.2	265004	115916	73645.1	125895	123083	158979	380004	158338	105152	220689	1.5058	2.09876	-1.39378	0.409118	0.531614	0.531614	0.531614
Q99426	TBCB	1155	Tubulin-folding cofactor B [OS=Homo sapiens]	defense response;metabolic process	137293	103977	70710.6	116497	151349	102151	127109	92440	107675	103993	123332	109075	-1.18596	-1.13072	-1.04886	0.662569	0.793517	0.793517	0.819768
Q08554	DSC1	1823	Desmocollin-1 [OS=Homo sapiens]	cell communication	42862.4	47769.4	78463.9	103837	39446.1	70376.7	48901.6	28242.9	121021	56365.3	71220.1	66055.3	-1.26355	-1.07819	-1.17191	0.876012	0.864465	0.864465	0.864465
O75144	ICOSLG	23308	ICOS ligand [OS=Homo sapiens]	coagulation;development;metabolic process	15018.2	10166.6	8424.41	18293.5	16278.8	15899.5	17544.2	23205.5	22520.1	11203.1	16823.9	21089.9	-1.50172	1.25356	-1.88251	0.0132632	0.070467	0.107357	0.013931
Q6KC79	NIPBL	25836	Nipped-B-like protein [OS=Homo sapiens]	cell differentiation;cell growth;cell proliferation;coagulation;defense response;metabolic process	151554	36469.4	153721	87685.1	97833.2	90965.8	117486	21051.9	119221	113915	92161.3	85919.6	1.23603	-1.07265	1.32583	0.784349	0.884879	0.884879	0.884879
A6NHR9	SMCHD1	23347	Structural maintenance of chromosomes flexible hinge domain-containing protein 1 [OS=Homo sapiens]	cell growth;cell proliferation;cellular homeostasis;coagulation;defense response;metabolic process	273162	255748	293800	168584	96291.4	199330	134279	222532	222398	274237	154735	193070	1.7723	1.24774	1.4204	0.0392968	0.0467117	0.324887	0.0954995
P02751	FN1	2335	Fibronectin [OS=Homo sapiens]	cell communication;cell growth;cell organization and biogenesis;cellular homeostasis;coagulation;defense response;development;metabolic process	104721	128487	98725.8	132162	111423	139752	132281	123228	166148	110645	127779	140552	-1.15486	1.09997	-1.27031	0.205999	0.418772	0.418772	0.265166
Q9NQI0	DDX4	54514	Probable ATP-dependent RNA helicase DDX4 [OS=Homo sapiens]	cell differentiation;cell growth;cell proliferation;cellular component movement;cellular homeostasis;metabolic process	113677	126254	107355	79798	111616	236199	98881.4	116156	102605	115762	142538	105881	-1.2313	-1.34621	1.09332	0.650707	0.784103	0.784103	0.810636
P55058	PLTP	5360	Phospholipid transfer protein [OS=Homo sapiens]	cell growth;cellular homeostasis;conjugation;metabolic process	69706.8	37779.6	69313.2	70524.5	122463	27087.8	112851	103041	123830	58933.2	73358.5	113241	-1.24477	1.54366	-1.92151	0.152549	0.579037	0.234211	0.208193
P35749	MYH11	4629	Myosin-11 [OS=Homo sapiens]	cell growth;defense response;metabolic process	65730.4	62474.1	67953	52803.7	68680	83800.3	64894.2	62946.4	82349.5	65385.8	68428	70063.4	-1.04653	1.0239	-1.07154	0.87204	0.861323	0.861323	0.861323
Q9NXV6	CDKN2AIP	55602	CDKN2A-interacting protein [OS=Homo sapiens]	coagulation;metabolic process	142717	124159	89579.9	53223.6	105028	46722.8	56129.2	38047.6	91348.7	118819	68324.8	61841.9	1.73903	-1.10483	1.92133	0.0971051	0.112717	0.791813	0.112717
P01031	C5	727	Complement C5 [OS=Homo sapiens]	coagulation;defense response;development;metabolic process	240266	222798	188598	383459	429983	316124	83975.3	105904	113470	217220	376522	101116	-1.73336	-3.72366	2.14823	0.000318215	0.00298493	0.000313429	0.00897528
P00533	EGFR	1956	Epidermal growth factor receptor [OS=Homo sapiens]	cell communication;cell growth;cell organization and biogenesis;cellular homeostasis;coagulation;defense response;development;metabolic process	1.29151e+06	945223	802213	1.61755e+06	1.08278e+06	1.04799e+06	747511	840528	1.33554e+06	1.01298e+06	1.24944e+06	974527	-1.23342	-1.2821	1.03946	0.51108	0.551417	0.551417	0.879313
O00442	RTCA	8634	RNA 3'-terminal phosphate cyclase [OS=Homo sapiens]	cellular component movement;cellular homeostasis	378604	529392	389859	335640	341142	246033	325373	296190	353984	432618	307605	325182	1.40641	1.05714	1.33039	0.0844657	0.105298	0.731345	0.105298
Q13362	PPP2R5C	5527	Serine/threonine-protein phosphatase 2A 56 kDa regulatory subunit gamma isoform [OS=Homo sapiens]	cell differentiation;cell organization and biogenesis;cellular homeostasis;coagulation;development;metabolic process	116051	107428	113178	33368.9	39244	48166.7	129846	127429	117887	112219	40259.9	125054	2.78736	3.10617	-1.11438	5.81958e-06	1.12107e-05	8.55419e-06	0.0439982
Q92520	FAM3C	10447	Protein FAM3C [OS=Homo sapiens]	development;metabolic process	1.35191e+06	2.14518e+06	1.51795e+06	2.27433e+06	2.24153e+06	2.20355e+06	1.6845e+06	1.32107e+06	1.67247e+06	1.67168e+06	2.2398e+06	1.55934e+06	-1.33985	-1.43637	1.07204	0.0444252	0.0630119	0.0630119	0.628721
Q9GZR7	DDX24	57062	ATP-dependent RNA helicase DDX24 [OS=Homo sapiens]	cellular component movement;cellular homeostasis	39221.3	22829.5	33661.9	28762.2	14158.7	35687	33802.5	42495.3	32599	31904.2	26202.7	36298.9	1.2176	1.38531	-1.13775	0.406123	0.552321	0.552321	0.552321
Q9H4A4	RNPEP	6051	Aminopeptidase B [OS=Homo sapiens]	cell organization and biogenesis	1.80635e+06	1.67205e+06	1.69252e+06	1.78114e+06	2.50029e+06	1.83825e+06	1.68853e+06	1.62265e+06	1.81695e+06	1.72364e+06	2.03989e+06	1.70938e+06	-1.18348	-1.19335	1.00834	0.244522	0.239541	0.239541	0.944656
Q01650	SLC7A5	8140	Large neutral amino acids transporter small subunit 1 [OS=Homo sapiens]	conjugation;metabolic process	1.38626e+06	1.45385e+06	1.2488e+06	1.65015e+06	1.68879e+06	1.48313e+06	1.44031e+06	1.18517e+06	1.20399e+06	1.36297e+06	1.60736e+06	1.27649e+06	-1.1793	-1.2592	1.06775	0.0352281	0.0700115	0.0444887	0.410786
O00743	PPP6C	5537	Serine/threonine-protein phosphatase 6 catalytic subunit [OS=Homo sapiens]	cell differentiation;cell growth;cell organization and biogenesis;cellular homeostasis;coagulation;conjugation	126168	142257	120148	32530.5	64280.8	32929.8	69576.7	106811	89855.1	129524	43247.1	88747.7	2.99498	2.05211	1.45947	0.00202897	0.00200533	0.0219764	0.0228247
P15924	DSP	1832	Desmoplakin [OS=Homo sapiens]	cell communication;cell growth;cell organization and biogenesis;cellular homeostasis;coagulation;defense response;metabolic process	1.17858e+07	1.18371e+07	1.0912e+07	6.61357e+06	6.44638e+06	7.9466e+06	9.08356e+06	8.49682e+06	9.83312e+06	1.15116e+07	7.00219e+06	9.13783e+06	1.64401	1.305	1.25978	0.000586884	0.00056987	0.00859986	0.00794979
P53396	ACLY	47	ATP-citrate synthase [OS=Homo sapiens]	cellular homeostasis	1.35891e+07	1.12153e+07	1.71102e+07	1.5238e+07	9.78816e+06	1.49239e+07	1.10746e+07	1.17392e+07	1.74095e+07	1.39715e+07	1.33167e+07	1.34078e+07	1.04917	1.00684	1.04205	0.963518	0.973122	0.973122	0.973122
Q5J8M3	EMC4	51234	ER membrane protein complex subunit 4 [OS=Homo sapiens]	cell growth;metabolic process	14063.6	15603.5	14989.2	20696.9	20709.2	18359.3	15483.5	15758.4	17299.1	14885.4	19921.8	16180.3	-1.33834	-1.23124	-1.08699	0.00284925	0.00344526	0.0075485	0.186298
P0DPH7	TUBA3C	7278	Tubulin alpha-3C chain [OS=Homo sapiens]	cell differentiation;cell growth	29353.4	34748	32451.8	24633.2	27693.1	45942.9	28121.7	30104.8	33930.8	32184.4	32756.4	30719.1	-1.01777	-1.06632	1.0477	0.936085	0.924003	0.924003	0.924003
P42704	LRPPRC	10128	Leucine-rich PPR motif-containing protein, mitochondrial [OS=Homo sapiens]	conjugation;metabolic process	2.2369e+07	2.12193e+07	2.07141e+07	1.21318e+07	12261157	1.10895e+07	1.62269e+07	1.59173e+07	1.6768e+07	2.14341e+07	1.18275e+07	1.63041e+07	1.81223	1.37849	1.31465	6.48605e-06	6.15159e-06	0.000168749	0.000117605
Q9HB75	PIDD1	55367	p53-induced death domain-containing protein 1 [OS=Homo sapiens]	cell differentiation;cell organization and biogenesis;cellular homeostasis;coagulation;development;metabolic process	24717.5	36338.7	20301	20200.1	16464.5	16403.7	37278.2	18450.6	15985.4	27119	17689.4	23904.7	1.53306	1.35136	1.13446	0.425212	0.595413	0.595413	0.653849
P50749	RASSF2	9770	Ras association domain-containing protein 2 [OS=Homo sapiens]	cell differentiation;cell organization and biogenesis;cellular homeostasis;defense response;development;metabolic process	106307	109347	105873	66887.5	65966.2	60941.1	94612.8	68956.6	72758	107176	64598.3	78775.8	1.65911	1.21947	1.36051	0.00205887	0.00223702	0.0807303	0.00850905
P33947	KDELR2	11014	ER lumen protein-retaining receptor 2 [OS=Homo sapiens]	conjugation;metabolic process	17761.9	41951.5	27512.9	4635.14	7758.83	9934.17	28156.1	37509.2	15668.8	29075.4	7442.71	27111.4	3.90656	3.64267	1.07244	0.0596277	0.0684142	0.0684142	0.810104
P12111	COL6A3	1293	Collagen alpha-3(VI) chain [OS=Homo sapiens]	cell communication;defense response;metabolic process	7415.03	6770.7	6611.48	7328.76	8837.98	8646.12	6800.59	8009.69	7564.8	6932.4	8270.95	7458.36	-1.19309	-1.10895	-1.07587	0.106574	0.12868	0.256677	0.353245
P10619	CTSA	5476	Lysosomal protective protein [OS=Homo sapiens]	cell organization and biogenesis;conjugation;metabolic process	44966.6	60568.3	72102.6	59945.1	43847	91789.3	64351.1	67083.9	60067.7	59212.5	65193.8	63834.2	-1.10101	-1.0213	-1.07805	0.89627	0.921774	0.921774	0.921774
Q9Y520	PRRC2C	23215	Protein PRRC2C [OS=Homo sapiens]	cell growth;defense response;metabolic process	238460	124136	306691	150433	176979	135652	232042	221485	267744	223096	154355	240424	1.44534	1.55761	-1.07767	0.221802	0.27893	0.27893	0.719538
Q6IBS0	TWF2	11344	Twinfilin-2 [OS=Homo sapiens]	cell growth;defense response;metabolic process	74836	75006.9	80151.2	72218.7	85657	77954.4	74475.4	84000.1	86772.5	76664.7	78610	81749.4	-1.02537	1.03994	-1.06632	0.571143	0.688603	0.688603	0.688603
P33993	MCM7	4176	DNA replication licensing factor MCM7 [OS=Homo sapiens]	cell differentiation;cell growth;cell proliferation;cellular homeostasis;coagulation;metabolic process	4.25501e+06	3.57777e+06	3.73342e+06	2.22917e+06	2.53667e+06	2.15267e+06	3.45642e+06	3.44248e+06	3.24823e+06	3.8554e+06	2.30617e+06	3.38238e+06	1.67177	1.46666	1.13985	0.000663324	0.000737291	0.00256546	0.0562326
Q15014	MORF4L2	9643	Mortality factor 4-like protein 2 [OS=Homo sapiens]	cell growth;cell organization and biogenesis;cell proliferation;cellular homeostasis;coagulation;metabolic process	81572.8	95120.5	99907.6	48484.3	55521.9	37045	110643	108639	104275	92200.3	47017.1	107852	1.961	2.2939	-1.16976	0.000206295	0.000639958	0.00024522	0.0517514
Q05048	CSTF1	1477	Cleavage stimulation factor subunit 1 [OS=Homo sapiens]	cellular component movement;cellular homeostasis	234432	225524	207466	165278	124022	164932	223146	263473	247604	222474	151411	244741	1.46934	1.61641	-1.10009	0.00276648	0.00671833	0.00344564	0.215508
P42892	ECE1	1889	Endothelin-converting enzyme 1 [OS=Homo sapiens]	cell organization and biogenesis;cellular homeostasis;defense response;development;metabolic process	6040.18	7622.48	5174.42	125743	126750	100866	74413.8	55214.8	68496.8	6279.03	117787	66041.8	-18.7587	-1.78352	-10.5178	3.41363e-05	3.25629e-05	0.000809787	0.000560243
P08779	KRT16	3868	Keratin, type I cytoskeletal 16 [OS=Homo sapiens]	cell growth;coagulation;defense response;metabolic process	6.05144e+06	5.88104e+06	1.32392e+07	7.15637e+06	3.947e+06	6.37729e+06	6.44949e+06	2.49897e+06	2.08145e+07	8.39057e+06	5.82689e+06	9.92099e+06	1.43998	1.70262	-1.1824	0.724774	0.770712	0.770712	0.770712
Q8IWJ2	GCC2	9648	GRIP and coiled-coil domain-containing protein 2 [OS=Homo sapiens]	cell growth;conjugation;metabolic process	72370	53256.1	48115.9	46516.8	44775.5	39679.2	38124.8	47342.6	40627.1	57914	43657.1	42031.5	1.32656	-1.03868	1.37787	0.100204	0.113346	0.814876	0.113346
Q9Y676	MRPS18B	28973	28S ribosomal protein S18b, mitochondrial [OS=Homo sapiens]	cell organization and biogenesis;cellular homeostasis	23588.2	36458.9	29077.3	18972.7	25040.3	17919.8	28963.9	18368.9	22792	29708.1	20644.3	23374.9	1.43905	1.13227	1.27094	0.181924	0.245498	0.552513	0.292312
Q86SF2	GALNT7	51809	N-acetylgalactosaminyltransferase 7 [OS=Homo sapiens]	cell organization and biogenesis;cellular homeostasis	16109.6	23838.3	19140.6	10803.2	11517.1	14851.5	61872	15050	12969.9	19696.2	12390.6	29964	1.58961	2.41829	-1.52131	0.457236	0.600052	0.600052	0.600052
Q14204	DYNC1H1	1778	Cytoplasmic dynein 1 heavy chain 1 [OS=Homo sapiens]	cell differentiation;cell growth;conjugation;metabolic process	1.0866e+07	1.12058e+07	1.10817e+07	1.03623e+07	9.94682e+06	1.03042e+07	8.74736e+06	8.25028e+06	8.49624e+06	1.10512e+07	1.02044e+07	8.49796e+06	1.08298	-1.20081	1.30045	2.01615e-05	0.00310334	0.000109097	2.12883e-05
P08195	SLC3A2	6520	4F2 cell-surface antigen heavy chain [OS=Homo sapiens]	cellular homeostasis;conjugation;metabolic process	1.3733e+07	1.29501e+07	1.2856e+07	1.41784e+07	1.33099e+07	1.21838e+07	1.05759e+07	1.10978e+07	1.04539e+07	1.31797e+07	1.3224e+07	1.07092e+07	-1.00336	-1.23483	1.23069	0.00567112	0.938106	0.00607482	0.00607482
P62258	YWHAE	7531	14-3-3 protein epsilon [OS=Homo sapiens]	coagulation;conjugation;development;metabolic process	1.87594e+07	1.82935e+07	2.11003e+07	2.09679e+07	2.94627e+07	3.02412e+07	2.41819e+07	2.12074e+07	1.79649e+07	1.93844e+07	2.68906e+07	2.11181e+07	-1.38723	-1.27334	-1.08944	0.0930359	0.127032	0.14327	0.574494
P23229	ITGA6	3655	Integrin alpha-6 [OS=Homo sapiens]	cell communication;cell growth;defense response;development;metabolic process	2.02855e+06	2.15413e+06	2.06284e+06	1.52546e+06	1.12761e+06	1.33899e+06	1.37582e+06	1.29658e+06	1.28948e+06	2.08184e+06	1.33068e+06	1.32063e+06	1.56449	-1.00762	1.5764	0.000415945	0.000462714	0.924115	0.000462714
P30566	ADSL	158	Adenylosuccinate lyase [OS=Homo sapiens]	cellular homeostasis;coagulation;metabolic process	670586	864539	749130	605714	725671	585507	756651	787653	815177	761418	638964	786493	1.19164	1.23089	-1.03293	0.0992285	0.13004	0.13004	0.689794
Q9HD45	TM9SF3	56889	Transmembrane 9 superfamily member 3 [OS=Homo sapiens]	metabolic process	884607	712296	757313	822209	901940	677589	585623	461371	624006	784739	800579	557000	-1.02019	-1.4373	1.40887	0.0378016	0.847875	0.042114	0.042114
Q15125	EBP	10682	3-beta-hydroxysteroid-Delta(8),Delta(7)-isomerase [OS=Homo sapiens]	cellular homeostasis;conjugation;defense response	291755	287637	263750	371146	335864	324324	310715	253572	279551	281047	343778	281279	-1.2232	-1.22219	-1.00083	0.02573	0.0255023	0.0255023	0.990701
Q9P0S9	TMEM14C	51522	Transmembrane protein 14C [OS=Homo sapiens]	cellular homeostasis;conjugation;defense response;metabolic process	625862	385407	492420	624743	443703	712950	515421	515413	481728	501230	593799	504187	-1.18468	-1.17773	-1.0059	0.516738	0.510853	0.510853	0.973857
O95573	ACSL3	2181	Long-chain-fatty-acid--CoA ligase 3 [OS=Homo sapiens]	cell growth;cellular homeostasis;conjugation;defense response;metabolic process	2.02619e+06	2.13455e+06	1.88854e+06	1.62164e+06	1.93151e+06	1.31962e+06	1.08524e+06	1.11965e+06	1.13482e+06	2.01643e+06	1.62426e+06	1.11324e+06	1.24145	-1.45904	1.81131	0.00344393	0.0456204	0.0253411	0.00348178
O15143	ARPC1B	10095	Actin-related protein 2/3 complex subunit 1B [OS=Homo sapiens]	cell growth;metabolic process	1.69e+06	1.92046e+06	1.84823e+06	1.01101e+06	1.04855e+06	1.00973e+06	1.66585e+06	1.68605e+06	1.58378e+06	1.81957e+06	1.0231e+06	1.64522e+06	1.77849	1.60808	1.10597	3.2381e-05	4.11349e-05	8.5426e-05	0.03073
Q04695	KRT17	3872	Keratin, type I cytoskeletal 17 [OS=Homo sapiens]	cell growth;defense response;metabolic process	381200	615336	668082	776587	475297	380573	633591	364234	1.29089e+06	554873	544152	762905	1.0197	1.40201	-1.37492	0.648084	0.967868	0.66942	0.66942
P31944	CASP14	23581	Caspase-14 [OS=Homo sapiens]	cell organization and biogenesis;defense response;metabolic process	67195.9	51255.3	59260.7	107888	117717	117911	97333.7	86202	104249	59237.3	114506	95928.2	-1.933	-1.19366	-1.61939	0.000346621	0.000368617	0.0258397	0.00170729
Q92769	HDAC2	3066	Histone deacetylase 2 [OS=Homo sapiens]	cell growth;cell organization and biogenesis;cellular homeostasis;coagulation;defense response;metabolic process	2.36793e+06	1.87139e+06	2.35364e+06	2.03983e+06	1.41779e+06	1.87284e+06	2.27295e+06	2.27694e+06	2.27664e+06	2.19765e+06	1.77682e+06	2.27551e+06	1.23685	1.28067	-1.03543	0.0969927	0.123454	0.123454	0.713149
Q96IZ0	PAWR	5074	PRKC apoptosis WT1 regulator protein [OS=Homo sapiens]	cell growth;development;metabolic process	1.70501e+06	1.99063e+06	1.72578e+06	1.59797e+06	1.42756e+06	1.48168e+06	1.7804e+06	1.91301e+06	2.10722e+06	1.80714e+06	1.5024e+06	1.93355e+06	1.20283	1.28697	-1.06995	0.0241908	0.0578137	0.0290372	0.315487
Q8NF37	LPCAT1	79888	Lysophosphatidylcholine acyltransferase 1 [OS=Homo sapiens]	cellular homeostasis;defense response;metabolic process	2.3337e+06	2.02015e+06	1.75035e+06	1.88568e+06	2.12532e+06	1.60335e+06	1.43579e+06	1.31586e+06	1.26663e+06	2.03473e+06	1.87145e+06	1.33943e+06	1.08725	-1.3972	1.51911	0.0240968	0.421263	0.0460073	0.0311714
P61604	HSPE1	3336	10 kDa heat shock protein, mitochondrial [OS=Homo sapiens]	coagulation;metabolic process	2.45406e+07	2.57868e+07	2.29564e+07	2.8965e+07	3.31671e+07	2.63481e+07	2.70509e+07	2.55469e+07	2.58754e+07	2.44279e+07	2.94934e+07	2.61577e+07	-1.20736	-1.12752	-1.07081	0.0747109	0.090508	0.168324	0.371999
P45974	USP5	8078	Ubiquitin carboxyl-terminal hydrolase 5 [OS=Homo sapiens]	cell organization and biogenesis;cellular homeostasis;metabolic process	1.58627e+06	1.76583e+06	1.53554e+06	1.31152e+06	1.39615e+06	1.15991e+06	1.78676e+06	1.70192e+06	1.68214e+06	1.62921e+06	1.28919e+06	1.72361e+06	1.26375	1.33697	-1.05794	0.00490471	0.0103372	0.00636481	0.306178
P67812	SEC11A	23478	Signal peptidase complex catalytic subunit SEC11A [OS=Homo sapiens]	cell organization and biogenesis;cellular homeostasis	950833	991118	864762	984400	947799	860384	864902	933267	842567	935571	930861	880245	1.00506	-1.0575	1.06285	0.488357	0.925356	0.501318	0.501318
P61009	SPCS3	60559	Signal peptidase complex subunit 3 [OS=Homo sapiens]	cell organization and biogenesis;cellular homeostasis;conjugation;metabolic process	1.04262e+06	969925	935828	1.04885e+06	1.02436e+06	939669	964652	948903	902097	982790	1.00429e+06	938550	-1.02188	-1.07005	1.04714	0.320833	0.612997	0.462365	0.471945
Q9UHB9	SRP68	6730	Signal recognition particle subunit SRP68 [OS=Homo sapiens]	conjugation;metabolic process	1.04614e+06	1.0641e+06	1.09752e+06	875162	1.17375e+06	742970	1.00657e+06	989156	1.01162e+06	1.06926e+06	930628	1.00245e+06	1.14896	1.07717	1.06665	0.464551	0.547722	0.547722	0.547722
Q16778	H2BC21	8349	Histone H2B type 2-E [OS=Homo sapiens]	cell growth;coagulation;metabolic process	645697	3.16719e+06	2.05731e+06	1.78309e+06	249094	2.48416e+06	2.88886e+06	3.22407e+06	2.76212e+06	1.95673e+06	1.50545e+06	2.95835e+06	1.29977	1.9651	-1.51188	0.263251	0.598084	0.370343	0.394579
Q9NX20	MRPL16	54948	39S ribosomal protein L16, mitochondrial [OS=Homo sapiens]	cell organization and biogenesis;cellular homeostasis	98807.3	105541	92989.6	65056.7	54063.3	20559.6	57853.1	22150.7	67391.3	99112.5	46559.8	49131.7	2.12871	1.05524	2.01728	0.0278526	0.0303791	0.877225	0.0303791
P25205	MCM3	4172	DNA replication licensing factor MCM3 [OS=Homo sapiens]	cell differentiation;cell growth;cell proliferation;cellular homeostasis;coagulation	4.47215e+06	5.00477e+06	4.18552e+06	2.64082e+06	2.42556e+06	2.25362e+06	4.12007e+06	4.03949e+06	3.82352e+06	4.55415e+06	2.44e+06	3.99436e+06	1.86645	1.63703	1.14014	0.000227385	0.000267016	0.000733383	0.0494587
P00505	GOT2	2806	Aspartate aminotransferase, mitochondrial [OS=Homo sapiens]	cellular homeostasis;conjugation;defense response;metabolic process	8.36255e+06	7.7201e+06	7.38888e+06	6.13236e+06	7.42695e+06	5.40859e+06	6.06379e+06	6.29817e+06	5.68732e+06	7.82384e+06	6.32263e+06	6.01643e+06	1.23743	-1.0509	1.30041	0.036097	0.0529867	0.601007	0.0519315
P16422	EPCAM	4072	Epithelial cell adhesion molecule [OS=Homo sapiens]	cell communication;defense response;development;metabolic process	800093	710977	752246	1.00039e+06	1.22011e+06	641187	582036	738585	649036	754439	953895	656552	-1.26438	-1.45288	1.14909	0.191058	0.3238	0.254443	0.522548
P05023	ATP1A1	476	Sodium/potassium-transporting ATPase subunit alpha-1 [OS=Homo sapiens]	cellular homeostasis;conjugation;metabolic process	1.56826e+07	1.56412e+07	1.46342e+07	16002334	1.48365e+07	1.3081e+07	1.28543e+07	1.23972e+07	1.31058e+07	1.53193e+07	1.464e+07	1.27858e+07	1.0464	-1.14502	1.19816	0.0388968	0.409565	0.0778965	0.0488966
Q15005	SPCS2	9789	Signal peptidase complex subunit 2 [OS=Homo sapiens]	cell organization and biogenesis;cellular homeostasis;conjugation	1.1241e+06	936382	1.15151e+06	1.09885e+06	1.08621e+06	1.05962e+06	985220	1.08149e+06	1.0012e+06	1.07066e+06	1.08156e+06	1.02264e+06	-1.01018	-1.05762	1.04696	0.615198	0.864242	0.692129	0.692129
Q15041	ARL6IP1	23204	ADP-ribosylation factor-like protein 6-interacting protein 1 [OS=Homo sapiens]	cell growth;conjugation;metabolic process	213877	241073	263869	343945	351903	344346	302130	284448	207797	239606	346731	264791	-1.44709	-1.30945	-1.10511	0.0158904	0.0203639	0.0320138	0.378671
P56747	CLDN6	9074	Claudin-6 [OS=Homo sapiens]	cell communication;cell growth;metabolic process	778602	692749	692511	857737	822205	770557	805911	883597	775095	721287	816833	821534	-1.13247	1.00576	-1.13898	0.0845886	0.0869364	0.912148	0.0869364
P24390	KDELR1	10945	ER lumen protein-retaining receptor 1 [OS=Homo sapiens]	conjugation;defense response;metabolic process	77252.9	78471.5	73271.8	40210.3	40393.9	68228.4	68856.7	64930.8	61359.3	76332.1	49610.9	65048.9	1.53862	1.31118	1.17346	0.0402398	0.0446322	0.148144	0.203547
P25391	LAMA1	284217	Laminin subunit alpha-1 [OS=Homo sapiens]	cell communication;cell growth;cell organization and biogenesis;cellular homeostasis;defense response;development;metabolic process	190067	231324	215154	6.5645e+07	3.80808e+06	8.95685e+07	206226	212441	201911	212182	5.30072e+07	206859	-249.82	-256.247	1.02573	0.0702685	0.0669579	0.0669579	0.999805
Q32MZ4	LRRFIP1	9208	Leucine-rich repeat flightless-interacting protein 1 [OS=Homo sapiens]	metabolic process	2.16051e+06	2.75308e+06	2.34753e+06	1.58418e+06	1.71909e+06	1.29533e+06	1.87528e+06	1.8409e+06	1.85213e+06	2.42037e+06	1.53287e+06	1.8561e+06	1.57899	1.21087	1.30401	0.00650732	0.0069953	0.115451	0.0275068
P27449	ATP6V0C	527	V-type proton ATPase 16 kDa proteolipid subunit [OS=Homo sapiens]	cellular homeostasis;conjugation;metabolic process	396215	334734	377021	345801	307371	341798	357372	367253	362180	369323	331656	362268	1.11357	1.0923	1.01947	0.164859	0.210243	0.210243	0.708844
P39748	FEN1	2237	Flap endonuclease 1 [OS=Homo sapiens]	cell differentiation;cell growth;cell proliferation;cellular component movement;cellular homeostasis;coagulation;metabolic process	1.89144e+06	2.03188e+06	1.80566e+06	1.47136e+06	1.60327e+06	1.29039e+06	2.123e+06	2.15635e+06	2.09848e+06	1.90966e+06	1.45501e+06	2.12594e+06	1.31247	1.46112	-1.11326	0.000963787	0.00401971	0.00105121	0.0581244
Q16563	SYPL1	6856	Synaptophysin-like protein 1 [OS=Homo sapiens]	cell death	596484	545002	431923	504904	462285	435733	501095	494508	526656	524469	467641	507420	1.12152	1.08506	1.0336	0.458413	0.596606	0.596606	0.70988
Q9BQP7	MGME1	92667	Mitochondrial genome maintenance exonuclease 1 [OS=Homo sapiens]	cell growth;cell proliferation;cellular homeostasis;coagulation	84472.1	43642	70985.2	13163.5	44912.5	50945.9	59087.5	93122.5	72709.6	66366.5	36340.6	74973.2	1.82623	2.06307	-1.12969	0.110452	0.161936	0.153668	0.60788
P37837	TALDO1	6888	Transaldolase [OS=Homo sapiens]	cellular homeostasis	1.50817e+07	1.39843e+07	1.31564e+07	1.24517e+07	1.48642e+07	1.44862e+07	1.6854e+07	1.39605e+07	1.22692e+07	1.40741e+07	1.39341e+07	1.43612e+07	1.01005	1.03066	-1.0204	0.948444	0.919717	0.919717	0.919717
Q9H9B4	SFXN1	94081	Sideroflexin-1 [OS=Homo sapiens]	cellular homeostasis;conjugation	2.29099e+06	2.12897e+06	2.11769e+06	2.40316e+06	1.75756e+06	2.03674e+06	1.70121e+06	1.54609e+06	1.63874e+06	2.17922e+06	2.06582e+06	1.62868e+06	1.05489	-1.2684	1.33803	0.0333437	0.513945	0.0552987	0.0453095
Q96FW1	OTUB1	55611	Ubiquitin thioesterase OTUB1 [OS=Homo sapiens]	cell organization and biogenesis;cell proliferation;cellular homeostasis;coagulation;metabolic process	1.68366e+06	1.62235e+06	1.89006e+06	1.59292e+06	3.05321e+06	2.27165e+06	2.44231e+06	2.32223e+06	1.96613e+06	1.73202e+06	2.30593e+06	2.24356e+06	-1.33135	-1.0278	-1.29534	0.306184	0.323589	0.871569	0.323589
P11166	SLC2A1	6513	Solute carrier family 2, facilitated glucose transporter member 1 [OS=Homo sapiens]	cell growth;cellular homeostasis;coagulation;conjugation;defense response;metabolic process	5.6635e+06	4.95928e+06	5.26826e+06	1.32995e+07	1.18285e+07	1.01835e+07	6.60319e+06	6.49959e+06	6.14383e+06	5.29701e+06	1.17705e+07	6.41554e+06	-2.2221	-1.83469	-1.21116	0.000311743	0.00043651	0.000621568	0.192483
P08758	ANXA5	308	Annexin A5 [OS=Homo sapiens]	coagulation;development;metabolic process	4.17142e+06	3.36358e+06	4.13957e+06	4.09983e+06	5.51533e+06	4.59772e+06	4.93441e+06	5.4543e+06	4.36308e+06	3.89152e+06	4.73763e+06	4.91726e+06	-1.21742	1.03792	-1.26358	0.150476	0.18944	0.719292	0.18944
Q99959	PKP2	5318	Plakophilin-2 [OS=Homo sapiens]	cell communication;cell death;cell growth;defense response;metabolic process	2.86588e+06	2.20993e+06	2.39075e+06	701933	471592	833324	862157	797695	762954	2.48885e+06	668950	807602	3.72054	1.20727	3.08178	0.000101886	0.000140983	0.477554	0.000140983
O15127	SCAMP2	10066	Secretory carrier-associated membrane protein 2 [OS=Homo sapiens]	conjugation	933574	854770	860952	1.13402e+06	1.11804e+06	948618	621743	564615	631036	883099	1.06689e+06	605798	-1.20812	-1.76114	1.45775	0.000483702	0.0159525	0.000485599	0.00363124
P08559	PDHA1	5160	Pyruvate dehydrogenase E1 component subunit alpha, somatic form, mitochondrial [OS=Homo sapiens]	cellular homeostasis	1.48733e+06	1.68731e+06	1.5335e+06	1.21271e+06	739972	990026	1.01777e+06	1.0185e+06	994543	1.56938e+06	980901	1.01027e+06	1.59994	1.02994	1.55342	0.00482549	0.00565985	0.817902	0.00565985
Q16850	0	0	Lanosterol 14-alpha demethylase [OS=Homo sapiens]		40424.2	38827.8	36961.7	133685	194165	165480	113758	112529	86332.8	38737.9	164443	104207	-4.24502	-1.57805	-2.69004	0.000704566	0.000684919	0.00945806	0.00945806
Q13148	TARDBP	23435	TAR DNA-binding protein 43 [OS=Homo sapiens]	cell growth;cellular component movement;cellular homeostasis;coagulation;metabolic process	2.90294e+06	3.06714e+06	2.58265e+06	2.38866e+06	940962	2.06414e+06	2.35274e+06	2.44508e+06	2.2057e+06	2.85091e+06	1.79792e+06	2.33451e+06	1.58567	1.29845	1.2212	0.0849485	0.0978472	0.223836	0.223836
Q08722	CD47	961	Leukocyte surface antigen CD47 [OS=Homo sapiens]	cell communication;coagulation;conjugation;development;metabolic process	378888	440702	378159	596315	525065	440942	377079	332603	370846	399250	520774	360176	-1.30438	-1.44589	1.10848	0.0204342	0.041155	0.0260182	0.387534
P51571	SSR4	6748	Translocon-associated protein subunit delta [OS=Homo sapiens]		693756	731924	778801	779029	733687	683275	710364	747839	715434	734827	731997	724545	1.00387	-1.01028	1.01419	0.945898	0.931772	0.931772	0.931772
P54709	ATP1B3	483	Sodium/potassium-transporting ATPase subunit beta-3 [OS=Homo sapiens]	conjugation;metabolic process	5.48151e+06	4.97615e+06	5.07952e+06	5.50123e+06	4.5915e+06	4.19839e+06	4.44917e+06	4.42851e+06	4.39574e+06	5.17906e+06	4.76371e+06	4.42448e+06	1.08719	-1.07667	1.17055	0.164177	0.356242	0.356242	0.203809
Q14498	RBM39	9584	RNA-binding protein 39 [OS=Homo sapiens]	cellular component movement;cellular homeostasis;metabolic process	1.23688e+06	1.24057e+06	1.19182e+06	887102	191426	630237	812932	863125	780968	1.22309e+06	569588	819009	2.14732	1.4379	1.49338	0.0216972	0.0238889	0.186966	0.0785493
Q99523	SORT1	6272	Sortilin [OS=Homo sapiens]	cell growth;conjugation;development;metabolic process	1.52261e+06	1.68593e+06	1.41014e+06	668030	843219	600933	1.13173e+06	1.06535e+06	1.10086e+06	1.53956e+06	704061	1.09931e+06	2.18669	1.56139	1.40047	0.000265278	0.00025563	0.0044709	0.00397251
P07858	CTSB	1508	Cathepsin B [OS=Homo sapiens]	cell organization and biogenesis;cellular homeostasis;defense response;metabolic process	7.33544e+06	6.03829e+06	6.48361e+06	8.14897e+06	1.03167e+07	7.2368e+06	4.7771e+06	4.81039e+06	4.83098e+06	6.61911e+06	8.56749e+06	4.80616e+06	-1.29436	-1.78261	1.37721	0.010186	0.0660074	0.0104557	0.0660074
P33991	MCM4	4173	DNA replication licensing factor MCM4 [OS=Homo sapiens]	cell differentiation;cell growth;cell proliferation;cellular homeostasis;coagulation	4.14698e+06	4.45854e+06	4.00233e+06	2.32693e+06	2.03947e+06	2.0472e+06	3.69793e+06	3.84796e+06	3.43286e+06	4.20262e+06	2.13787e+06	3.65958e+06	1.9658	1.71179	1.14839	4.35784e-05	5.1068e-05	0.000146778	0.0173882
P20073	ANXA7	310	Annexin A7 [OS=Homo sapiens]	cell growth;cellular homeostasis;metabolic process	1.9634e+06	1.62871e+06	1.92549e+06	2.16575e+06	2.79415e+06	2.56871e+06	2.21757e+06	2.29333e+06	1.74298e+06	1.8392e+06	2.50954e+06	2.08463e+06	-1.36447	-1.20383	-1.13344	0.060946	0.0715516	0.158184	0.313399
Q9BR76	CORO1B	57175	Coronin-1B [OS=Homo sapiens]	cell growth;coagulation;metabolic process	991107	961351	850025	787813	654862	776837	967076	904721	923395	934161	739837	931731	1.26266	1.25937	1.00261	0.0144263	0.0148496	0.0148496	0.963988
P50995	ANXA11	311	Annexin A11 [OS=Homo sapiens]	cell differentiation;conjugation;metabolic process	1.27557e+06	940686	1.22349e+06	1.49916e+06	1.76039e+06	1.44241e+06	1.25341e+06	1.4244e+06	1.13379e+06	1.14658e+06	1.56732e+06	1.27053e+06	-1.36695	-1.23359	-1.10811	0.0508947	0.0628589	0.106462	0.395442
Q9Y3B3	TMED7	100302736; 51014	Transmembrane emp24 domain-containing protein 7 [OS=Homo sapiens]	cell growth;conjugation	804148	922716	798567	718772	914814	602666	585144	556910	531652	841811	745418	557902	1.12931	-1.33611	1.50889	0.0352983	0.286227	0.0946186	0.0410422
P43307	SSR1	6745	Translocon-associated protein subunit alpha [OS=Homo sapiens]	conjugation;metabolic process	1.21627e+06	1.54246e+06	1.10094e+06	1.54353e+06	1.58416e+06	1.21703e+06	1.21855e+06	1.23505e+06	1.07977e+06	1.28656e+06	1.44824e+06	1.17779e+06	-1.12567	-1.22963	1.09235	0.266281	0.480341	0.359697	0.493554
P54886	ALDH18A1	5832	Delta-1-pyrroline-5-carboxylate synthase [OS=Homo sapiens]	cellular homeostasis	4.85172e+06	4.90927e+06	4.56822e+06	3.84636e+06	1.61412e+06	3.04439e+06	3.38611e+06	3.27868e+06	3.36085e+06	4.7764e+06	2.83496e+06	3.34188e+06	1.68482	1.17881	1.42926	0.027497	0.0344583	0.384592	0.0567702
P61086	UBE2K	3093	Ubiquitin-conjugating enzyme E2 K [OS=Homo sapiens]	cell growth;cell organization and biogenesis;cellular homeostasis;coagulation;development;metabolic process	1.46752e+06	1.42383e+06	1.56241e+06	1.44235e+06	2.30538e+06	1.60779e+06	1.98236e+06	1.87613e+06	1.62702e+06	1.48459e+06	1.78517e+06	1.82851e+06	-1.20247	1.02428	-1.23166	0.346126	0.371627	0.859648	0.371627
Q02978	SLC25A11	8402	Mitochondrial 2-oxoglutarate/malate carrier protein [OS=Homo sapiens]	conjugation	1.39685e+06	1.26463e+06	1.3898e+06	1.10138e+06	703819	1.00144e+06	713913	865378	731235	1.35042e+06	935547	770175	1.44346	-1.21472	1.7534	0.004973	0.0143201	0.185933	0.0058143
Q9NSE4	IARS2	55699	Isoleucine--tRNA ligase, mitochondrial [OS=Homo sapiens]	cell organization and biogenesis;cellular component movement;cellular homeostasis	2.27142e+06	2.18815e+06	1.93697e+06	1.74415e+06	1.85384e+06	1.63525e+06	1.3809e+06	1.43063e+06	1.59947e+06	2.13218e+06	1.74441e+06	1.47033e+06	1.22229	-1.18641	1.45013	0.00292787	0.0193503	0.0484251	0.00298171
Q9BUL8	PDCD10	11235	Programmed cell death protein 10 [OS=Homo sapiens]	cell growth;coagulation;defense response;development;metabolic process	151228	117033	140217	139348	151263	173129	168581	185576	141518	136159	154580	165225	-1.13529	1.06886	-1.21347	0.246858	0.422582	0.519887	0.333929
Q9UHX1	PUF60	22827	Poly(U)-binding-splicing factor PUF60 [OS=Homo sapiens]	cell growth;cellular component movement;cellular homeostasis;metabolic process	1.57946e+06	1.67133e+06	1.58404e+06	1.31251e+06	600961	1.08638e+06	1.44606e+06	1.28167e+06	1.49626e+06	1.61161e+06	999949	1.40799e+06	1.61169	1.40807	1.14462	0.0380255	0.0446293	0.0976038	0.303633
Q14376	GALE	2582	UDP-glucose 4-epimerase [OS=Homo sapiens]	cellular homeostasis	140036	161599	134775	173942	234359	179610	195710	186038	169564	145470	195970	183771	-1.34715	-1.06638	-1.26329	0.072528	0.0966042	0.527545	0.119923
P08729	KRT7	3855	Keratin, type II cytoskeletal 7 [OS=Homo sapiens]		5.3602e+06	3.65139e+06	4.56519e+06	2.5332e+06	3.3059e+06	2.58821e+06	2.35929e+06	2.31436e+06	2.35827e+06	4.52559e+06	2.80911e+06	2.34397e+06	1.61104	-1.19844	1.93073	0.00665537	0.0134362	0.342734	0.00872212
P27487	DPP4	1803	Dipeptidyl peptidase 4 [OS=Homo sapiens]	cell communication;cell organization and biogenesis;coagulation;development;metabolic process	9831.44	8980.79	11543.5	11362.3	13603.3	13145.2	12100.8	10582.4	11159.5	10118.6	12703.6	11280.9	-1.25548	-1.12612	-1.11487	0.0759136	0.0871388	0.246805	0.246805
O60292	SIPA1L3	23094	Signal-induced proliferation-associated 1-like protein 3 [OS=Homo sapiens]	cell growth;defense response;metabolic process	162655	53020.1	116045	64641.1	52884.4	46333.9	80045.6	105545	77740.3	110573	54619.8	87777.1	2.02442	1.60706	1.25971	0.200481	0.25863	0.405029	0.435536
Q9UBL3	ASH2L	9070	Set1/Ash2 histone methyltransferase complex subunit ASH2 [OS=Homo sapiens]	cell organization and biogenesis;cellular homeostasis;coagulation;defense response;metabolic process	12898	39739.1	14660.5	14544.6	18140.6	15009	12101.5	13884.2	11727.9	22432.6	15898	12571.2	1.41103	-1.26464	1.78444	0.427478	0.594746	0.658484	0.594746
Q9NPA0	EMC7	56851	ER membrane protein complex subunit 7 [OS=Homo sapiens]	cell growth	153353	167892	162420	132495	120345	113930	151356	132171	131020	161222	122256	138182	1.31872	1.13027	1.16673	0.00706027	0.00735831	0.0870194	0.0381065
Q00325	SLC25A3	5250	Phosphate carrier protein, mitochondrial [OS=Homo sapiens]	conjugation	1.4243e+07	1.32445e+07	1.26875e+07	8.36662e+06	7.51316e+06	7.51374e+06	7.95078e+06	8.19538e+06	7.81616e+06	1.33917e+07	7.79784e+06	7.98744e+06	1.71736	1.02431	1.67659	2.41371e-05	2.93199e-05	0.686491	2.93199e-05
Q9UJS0	SLC25A13	10165	Calcium-binding mitochondrial carrier protein Aralar2 [OS=Homo sapiens]	cellular homeostasis;conjugation;metabolic process	3.78474e+06	3.18784e+06	3.37623e+06	1.9871e+06	1.26456e+06	2.01874e+06	1.81253e+06	1.94511e+06	1.88272e+06	3.44961e+06	1.7568e+06	1.88012e+06	1.96357	1.0702	1.83478	0.000849051	0.00112047	0.638315	0.00112047
O60716	CTNND1	1500	Catenin delta-1 [OS=Homo sapiens]	cell communication;cell death;cell growth;defense response;development;metabolic process	5.9563e+06	5.54975e+06	5.21805e+06	5.68298e+06	4.34984e+06	4.99641e+06	4.47082e+06	4.313e+06	4.34362e+06	5.5747e+06	5.00974e+06	4.37581e+06	1.11277	-1.14487	1.27398	0.0438962	0.169155	0.169155	0.0482445
Q96I24	FUBP3	8939	Far upstream element-binding protein 3 [OS=Homo sapiens]	cellular component movement;cellular homeostasis;metabolic process	1.65412e+06	1.69873e+06	1.50588e+06	1.17243e+06	443837	951702	1.22393e+06	1.30146e+06	1.17546e+06	1.61958e+06	855991	1.23362e+06	1.89205	1.44116	1.31287	0.0176177	0.0184382	0.0871391	0.0871391
P22695	UQCRC2	7385	Cytochrome b-c1 complex subunit 2, mitochondrial [OS=Homo sapiens]	cell organization and biogenesis;cellular homeostasis;metabolic process	2.90881e+06	3.46148e+06	2.79649e+06	2.12403e+06	1.46607e+06	1.71893e+06	1.93066e+06	1.83049e+06	1.92224e+06	3.05559e+06	1.76968e+06	1.89446e+06	1.72664	1.07051	1.61291	0.00258407	0.00357657	0.6084	0.00357657
Q9NRP0	OSTC	58505	Oligosaccharyltransferase complex subunit OSTC [OS=Homo sapiens]	cell organization and biogenesis;cellular homeostasis	370451	349089	350560	470547	444391	416404	283826	320285	299704	356700	443781	301271	-1.24413	-1.47303	1.18398	0.000380622	0.00271543	0.000384172	0.0148452
P11169	SLC2A3	6515	Solute carrier family 2, facilitated glucose transporter member 3 [OS=Homo sapiens]	cellular homeostasis;conjugation	6.97655e+06	6.45827e+06	6.90985e+06	1.45808e+07	1.4633e+07	1.17679e+07	6.48544e+06	6.44827e+06	5.89534e+06	6.78156e+06	1.36605e+07	6.27635e+06	-2.01437	-2.17651	1.08049	0.000151679	0.000203254	0.000203254	0.550724
P42126	ECI1	1632	Enoyl-CoA delta isomerase 1, mitochondrial [OS=Homo sapiens]	cellular homeostasis	2.22306e+06	2.33575e+06	2.24799e+06	1.94003e+06	2.46139e+06	2.00132e+06	2.2885e+06	2.3755e+06	2.2102e+06	2.26893e+06	2.13425e+06	2.2914e+06	1.06311	1.07363	-1.0099	0.528675	0.572213	0.572213	0.880012
Q8WXF1	PSPC1	55269	Paraspeckle component 1 [OS=Homo sapiens]	cellular component movement;cellular homeostasis;coagulation;metabolic process	1.7382e+06	1.78788e+06	1.69914e+06	1.69656e+06	735945	1.39964e+06	1.36446e+06	1.45117e+06	1.32076e+06	1.74174e+06	1.27738e+06	1.3788e+06	1.36353	1.0794	1.26323	0.196449	0.259902	0.680998	0.259902
M5A8F1	ERVH48-1	90625	Suppressyn [OS=Homo sapiens]	metabolic process	495449	485946	539580	228778	192622	226811	357834	377325	400664	506992	216070	378608	2.34642	1.75224	1.33909	1.72762e-05	1.65772e-05	0.000235446	0.000572118
Q86SS6	SYT9	143425	Synaptotagmin-9 [OS=Homo sapiens]	cell death;conjugation;metabolic process	562380	980829	693630	691469	1.17448e+06	742849	562209	535067	578884	745613	869600	558720	-1.16629	-1.55641	1.3345	0.230999	0.4705	0.305212	0.434767
Q4G148	GXYLT1	283464	Glucoside xylosyltransferase 1 [OS=Homo sapiens]	cell organization and biogenesis;cellular homeostasis	203614	201258	194515	153607	211968	149871	215658	229952	203656	199796	171816	216422	1.16285	1.25962	-1.08322	0.110717	0.247221	0.135585	0.383572
Q9Y3E0	GOLT1B	51026	Vesicle transport protein GOT1B [OS=Homo sapiens]	conjugation	690338	418497	555047	571100	492782	494294	495094	631664	568325	554627	519392	565028	1.06784	1.08786	-1.01875	0.820355	0.893912	0.893912	0.893912
O75340	PDCD6	10016	Programmed cell death protein 6 [OS=Homo sapiens]	cell growth;cell organization and biogenesis;cellular homeostasis;coagulation;conjugation;defense response;development;metabolic process	614126	561219	589489	1.00978e+06	1.10173e+06	1.21355e+06	837567	792185	717455	588278	1.10835e+06	782402	-1.88406	-1.4166	-1.32999	0.000295904	0.00030218	0.00191638	0.0147526
Q9NY12	GAR1	54433	H/ACA ribonucleoprotein complex subunit 1 [OS=Homo sapiens]	cell growth;cell proliferation;cellular component movement;cellular homeostasis	10158.5	24535.8	20870.7	15286	12045.5	28082.3	30814.8	26340.1	18049.3	18521.6	18471.3	25068.1	1.00273	1.35714	-1.35345	0.506463	0.99372	0.491068	0.491068
Q14019	COTL1	23406	Coactosin-like protein [OS=Homo sapiens]	cell growth;coagulation	1.01853e+06	876194	925617	1.48485e+06	2.13983e+06	1.70492e+06	1.58464e+06	1.4952e+06	1.4458e+06	940113	1.77653e+06	1.50854e+06	-1.8897	-1.17765	-1.60464	0.0059692	0.00669674	0.153706	0.0201369
Q07021	C1QBP	708	Complement component 1 Q subcomponent-binding protein, mitochondrial [OS=Homo sapiens]	cell growth;cellular component movement;cellular homeostasis;coagulation;development;metabolic process	1.78863e+06	2.80185e+06	1.87418e+06	1.64091e+06	1.92307e+06	1.28934e+06	1.64844e+06	1.21135e+06	1.45847e+06	2.15489e+06	1.61777e+06	1.43942e+06	1.33201	-1.12391	1.49705	0.146802	0.218443	0.598904	0.20271
P28072	PSMB6	5694	Proteasome subunit beta type-6 [OS=Homo sapiens]	cell organization and biogenesis;cellular homeostasis	3.28829e+06	4.00428e+06	3.37792e+06	3.25492e+06	2.52878e+06	3.31924e+06	4.82595e+06	4.79835e+06	5.12662e+06	3.55683e+06	3.03431e+06	4.91697e+06	1.1722	1.62046	-1.3824	0.00163062	0.121484	0.00190062	0.00502681
O75844	ZMPSTE24	10269	CAAX prenyl protease 1 homolog [OS=Homo sapiens]	cell growth;cell organization and biogenesis;cell proliferation;cellular homeostasis;coagulation;conjugation;defense response;development;metabolic process	1.0273e+06	1.24406e+06	1.03421e+06	943586	1.07269e+06	678319	966501	891079	898483	1.10186e+06	898199	918688	1.22674	1.02281	1.19938	0.21942	0.233653	0.86194	0.233653
Q96IU4	ABHD14B	84836	Protein ABHD14B [OS=Homo sapiens]	cellular homeostasis;metabolic process	39900.6	22338.1	25623.7	54397.3	60344.5	64750.2	77030.3	33022.3	63814.9	29287.5	59830.7	57955.8	-2.04288	-1.03235	-1.97886	0.0715601	0.0762903	0.878737	0.0762903
Q9HDC9	APMAP	57136	Adipocyte plasma membrane-associated protein [OS=Homo sapiens]	cellular homeostasis	5.21842e+06	4.66714e+06	4.71285e+06	6.36861e+06	7.60747e+06	5.32509e+06	3.7875e+06	4.36499e+06	3.92085e+06	4.86614e+06	6.43372e+06	4.02445e+06	-1.32214	-1.59866	1.20914	0.0155183	0.0517053	0.0173199	0.193931
Q9UBC2	EPS15L1	58513	Epidermal growth factor receptor substrate 15-like 1 [OS=Homo sapiens]	conjugation	247877	315254	270935	203572	172677	166847	211726	206228	215236	278022	181032	211063	1.53576	1.16589	1.31724	0.00547706	0.00621323	0.160423	0.0176693
Q9H3S7	PTPN23	25930	Tyrosine-protein phosphatase non-receptor type 23 [OS=Homo sapiens]	cell growth;cell organization and biogenesis;cellular homeostasis;conjugation;metabolic process	17690.9	19875.5	16684	13939.6	9067.02	21140.3	14833.6	14465.4	16560.5	18083.5	14715.7	15286.5	1.22886	1.03879	1.18297	0.525978	0.583225	0.855905	0.583225
O75352	MPDU1	9526	Mannose-P-dolichol utilization defect 1 protein [OS=Homo sapiens]	cell organization and biogenesis;cellular homeostasis;metabolic process	72336.6	58531.5	53148.7	94543.4	83643.1	81466.4	71413.5	65897.4	63362.2	61338.9	86551	66891.1	-1.41103	-1.29391	-1.09052	0.0133975	0.017511	0.0259816	0.393198
Q99808	SLC29A1	2030	Equilibrative nucleoside transporter 1 [OS=Homo sapiens]	cell death;cellular homeostasis;coagulation;conjugation;defense response;development;metabolic process	2.26658e+06	1.94857e+06	1.77123e+06	1.16654e+06	995945	985162	1.80511e+06	1.95139e+06	1.82739e+06	1.99546e+06	1.04921e+06	1.86129e+06	1.90186	1.77399	1.07208	0.000775334	0.00116135	0.00131773	0.351897
P63173	RPL38	6169	60S ribosomal protein L38 [OS=Homo sapiens]	cell growth;cell organization and biogenesis;cellular homeostasis;defense response;metabolic process	864980	1.23185e+06	1.98266e+06	914362	970638	2.05557e+06	1.59496e+06	1.47486e+06	1.09637e+06	1.35983e+06	1.31352e+06	1.38873e+06	1.03525	1.05726	-1.02125	0.984099	0.947773	0.947773	0.947773
P04179	SOD2	6648	Superoxide dismutase [Mn], mitochondrial [OS=Homo sapiens]	cell growth;cellular homeostasis;coagulation;development;metabolic process	198786	187987	179161	156390	200340	127236	165368	152244	156690	188645	161322	158101	1.16937	-1.02038	1.19319	0.260893	0.276875	0.86555	0.276875
P20645	M6PR	4074	Cation-dependent mannose-6-phosphate receptor [OS=Homo sapiens]	conjugation	3.19927e+06	3.90516e+06	3.15407e+06	3.37163e+06	4.07098e+06	2.7629e+06	2.54534e+06	2.36912e+06	2.3212e+06	3.4195e+06	3.40184e+06	2.41188e+06	1.00519	-1.41045	1.41777	0.0562509	0.963583	0.0557288	0.0557288
Q7L014	DDX46	9879	Probable ATP-dependent RNA helicase DDX46 [OS=Homo sapiens]	cellular component movement;cellular homeostasis	1.22276e+06	1.20247e+06	1.17047e+06	863091	486560	806823	1.0824e+06	1.04622e+06	1.00003e+06	1.19857e+06	718825	1.04289e+06	1.6674	1.45082	1.14928	0.00746449	0.00837462	0.0249112	0.16503
Q9BVK6	TMED9	54732	Transmembrane emp24 domain-containing protein 9 [OS=Homo sapiens]	cell growth;conjugation;metabolic process	3.00461e+06	3.5043e+06	3.14399e+06	4.0431e+06	4.4426e+06	3.47513e+06	3.14572e+06	3.07745e+06	2.63129e+06	3.21764e+06	3.98694e+06	2.95149e+06	-1.23909	-1.35082	1.09017	0.0284122	0.0574894	0.0358273	0.395586
P15291	B4GALT1	2683	Beta-1,4-galactosyltransferase 1 [OS=Homo sapiens]	cell communication;cell growth;cell organization and biogenesis;cellular homeostasis;coagulation;defense response;metabolic process	428056	417996	391821	126801	170547	109122	261706	275049	241289	412624	135490	259348	3.04542	1.91415	1.59101	2.09412e-05	2.00577e-05	0.000636328	0.000298562
P12236	SLC25A6	293	ADP/ATP translocase 3 [OS=Homo sapiens]	conjugation;metabolic process	1.45556e+06	1.20375e+06	1.2189e+06	571108	644846	561772	718666	728778	623948	1.29274e+06	592575	690464	2.18156	1.16519	1.87227	0.000171217	0.00025807	0.240003	0.000300278
Q969E2	SCAMP4	113178	Secretory carrier-associated membrane protein 4 [OS=Homo sapiens]	conjugation	221077	211021	161322	201950	210166	183788	163889	132490	153349	197807	198635	149910	-1.00418	-1.32503	1.31951	0.0570489	0.964854	0.0564315	0.0564315
Q10471	GALNT2	2590	Polypeptide N-acetylgalactosaminyltransferase 2 [OS=Homo sapiens]	cell organization and biogenesis;cellular homeostasis	165041	96527.9	132052	69521.5	98621.6	49763	114633	122814	106335	131207	72635.4	114594	1.80638	1.57766	1.14497	0.0654969	0.0828795	0.125547	0.443447
P35613	BSG	682	Basigin [OS=Homo sapiens]	cell communication;cell growth;defense response;development;metabolic process	9.25444e+06	9.20096e+06	8.31142e+06	1.20277e+07	1.22029e+07	9.29989e+06	7.30634e+06	7.22964e+06	7.15809e+06	8.92227e+06	1.11768e+07	7.23136e+06	-1.25269	-1.5456	1.23383	0.00798235	0.0472896	0.00825977	0.0812134
Q9P2J5	LARS1	51520	Leucine--tRNA ligase, cytoplasmic [OS=Homo sapiens]	cell growth;cell organization and biogenesis;cellular component movement;cellular homeostasis;coagulation;metabolic process	4.74801e+06	5.20347e+06	4.55271e+06	3.13419e+06	3.22097e+06	3.12955e+06	4.06321e+06	3.9078e+06	4.1919e+06	4.83473e+06	3.16157e+06	4.0543e+06	1.52922	1.28237	1.19249	0.000216853	0.000208941	0.00312509	0.00403573
P27797	CALR	811	Calreticulin [OS=Homo sapiens]	cell growth;cell organization and biogenesis;cellular homeostasis;coagulation;conjugation;defense response;development;metabolic process	1.76356e+07	2.30633e+07	1.61795e+07	2.24785e+07	3.27285e+07	1.80531e+07	1.60225e+07	1.45113e+07	1.46572e+07	1.89595e+07	2.44201e+07	1.50637e+07	-1.28801	-1.62112	1.25862	0.137036	0.325491	0.168064	0.36308
P47985	UQCRFS1	7386	Cytochrome b-c1 complex subunit Rieske, mitochondrial [OS=Homo sapiens]	cell growth;cellular homeostasis;conjugation	634295	591781	575232	421256	270878	362340	413327	397687	354901	600436	351492	388638	1.70825	1.10568	1.54497	0.0018585	0.00273738	0.400439	0.00314542
P09110	ACAA1	30	3-ketoacyl-CoA thiolase, peroxisomal [OS=Homo sapiens]	cellular homeostasis	785441	761896	525280	751893	1.13688e+06	851351	535466	559606	758662	690873	913374	617911	-1.32206	-1.47816	1.11808	0.137083	0.205439	0.188699	0.594002
Q9UBQ0	VPS29	51699	Vacuolar protein sorting-associated protein 29 [OS=Homo sapiens]	conjugation	1.25249e+06	1.1954e+06	1.08918e+06	551019	619814	638351	1.30383e+06	1.31925e+06	1.11865e+06	1.17902e+06	603061	1.24724e+06	1.95506	2.06819	-1.05786	0.000157515	0.000241623	0.000241623	0.361221
Q9UBS4	DNAJB11	51726	DnaJ homolog subfamily B member 11 [OS=Homo sapiens]	cell organization and biogenesis;cellular homeostasis;metabolic process	835174	980343	733668	863104	763529	693882	704022	625549	648042	849728	773505	659205	1.09854	-1.17339	1.28902	0.102298	0.339024	0.255564	0.122639
P22307	SCP2	6342	Sterol carrier protein 2 [OS=Homo sapiens]	cell growth;cellular homeostasis;conjugation;metabolic process	963914	928808	847148	2.24279e+06	3.04661e+06	2.00546e+06	1.05526e+06	1.15212e+06	1.0341e+06	913290	2.43162e+06	1.08049e+06	-2.66248	-2.25047	-1.18308	0.00209819	0.00305963	0.00305963	0.544641
P40926	MDH2	4191	Malate dehydrogenase, mitochondrial [OS=Homo sapiens]	cellular homeostasis	3.78404e+07	3.68266e+07	3.45456e+07	3.69144e+07	4.27524e+07	3.14398e+07	2.9687e+07	3.0637e+07	2.96679e+07	3.64042e+07	3.70356e+07	2.99973e+07	-1.01734	-1.23463	1.21358	0.0828514	0.828803	0.092651	0.092651
Q92900	UPF1	5976	Regulator of nonsense transcripts 1 [OS=Homo sapiens]	cell differentiation;cell growth;cell proliferation;cellular component movement;cellular homeostasis;coagulation;conjugation;metabolic process	1.4758e+06	1.45231e+06	1.52857e+06	1.11813e+06	898182	977110	1.42446e+06	1.57133e+06	1.4035e+06	1.48556e+06	997809	1.46643e+06	1.48882	1.46965	1.01305	0.000699694	0.00083366	0.00083366	0.794932
Q9BSJ8	ESYT1	23344	Extended synaptotagmin-1 [OS=Homo sapiens]	cell growth;conjugation	662616	654711	593967	693488	620234	600050	435078	487163	511979	637098	637924	478073	-1.0013	-1.33436	1.33264	0.00530113	0.981701	0.0055144	0.0055144
P41252	IARS1	3376	Isoleucine--tRNA ligase, cytoplasmic [OS=Homo sapiens]	cell organization and biogenesis;cellular component movement;cellular homeostasis	3.04243e+06	3.28712e+06	2.93085e+06	2.18734e+06	2.14897e+06	2.12056e+06	2.62274e+06	2.52998e+06	2.54345e+06	3.0868e+06	2.15229e+06	2.56539e+06	1.43419	1.19194	1.20325	0.000149143	0.000144529	0.00382902	0.00178662
Q99623	PHB2	11331	Prohibitin-2 [OS=Homo sapiens]	cell differentiation;cell growth;cellular homeostasis;coagulation;conjugation;defense response;development;metabolic process	1.33192e+07	1.17893e+07	1.30699e+07	9.65683e+06	6.7285e+06	9.72326e+06	9.31999e+06	9.23316e+06	8.36334e+06	1.27261e+07	8.70286e+06	8.97216e+06	1.46229	1.03094	1.4184	0.00843293	0.010162	0.78152	0.010162
Q8WXH0	SYNE2	23224	Nesprin-2 [OS=Homo sapiens]	conjugation;metabolic process	567854	567381	566332	284856	141443	255102	386410	374000	314467	567189	227134	358293	2.49716	1.57745	1.58303	0.000430703	0.000436363	0.016883	0.00296584
Q9BVC6	TMEM109	79073	Transmembrane protein 109 [OS=Homo sapiens]	coagulation;conjugation;development;metabolic process	534900	573651	522995	706045	628448	608470	590148	512561	505709	543849	647654	536139	-1.19087	-1.208	1.01438	0.0337797	0.0382336	0.0382336	0.833627
Q6P2Q9	PRPF8	10594	Pre-mRNA-processing-splicing factor 8 [OS=Homo sapiens]	cell growth;cell organization and biogenesis;cellular component movement;cellular homeostasis;metabolic process	2.03889e+06	2.24944e+06	2.48288e+06	2.08405e+06	501863	1.9769e+06	2.08838e+06	2.05086e+06	1.95991e+06	2.25707e+06	1.52094e+06	2.03305e+06	1.484	1.33671	1.11019	0.2897	0.415248	0.419296	0.621737
Q01813	PFKP	5214	ATP-dependent 6-phosphofructokinase, platelet type [OS=Homo sapiens]	cellular homeostasis;metabolic process	7.09188e+06	7.10095e+06	6.78077e+06	6.87165e+06	6.93343e+06	6.54204e+06	6.59642e+06	6.5546e+06	6.4333e+06	6.9912e+06	6.78237e+06	6.52811e+06	1.03079	-1.03895	1.07094	0.0407741	0.178768	0.169859	0.044807
Q9BUQ8	DDX23	9416	Probable ATP-dependent RNA helicase DDX23 [OS=Homo sapiens]	cell growth;cell proliferation;cellular component movement;cellular homeostasis	76632.8	91359.8	129189	43340.8	34266.4	37208.3	40018.4	62930.2	70601.1	99060.6	38271.8	57849.9	2.58834	1.51155	1.71237	0.0173757	0.0199893	0.239049	0.0498537
O95833	CLIC3	9022	Chloride intracellular channel protein 3 [OS=Homo sapiens]	cellular homeostasis;conjugation;development;metabolic process	3.24072e+06	2.66838e+06	3.286e+06	4.30937e+06	5.35956e+06	5.65527e+06	5.4654e+06	5.35967e+06	4.15701e+06	3.06503e+06	5.10807e+06	4.99403e+06	-1.66656	-1.02284	-1.62936	0.0113703	0.0131301	0.828794	0.0131301
Q9NX02	NLRP2	55655	NACHT, LRR and PYD domains-containing protein 2 [OS=Homo sapiens]	coagulation;metabolic process	3.84354e+06	3.56487e+06	3.49977e+06	1.98007e+06	2.17594e+06	1.51223e+06	3.65272e+06	3.62709e+06	2.97072e+06	3.63606e+06	1.88941e+06	3.41684e+06	1.92444	1.80842	1.06416	0.000976	0.00151569	0.00154547	0.42776
P26196	DDX6	1656	Probable ATP-dependent RNA helicase DDX6 [OS=Homo sapiens]	cell growth;metabolic process	1.71326e+06	1.88053e+06	1.79704e+06	1.73771e+06	1.16731e+06	1.42563e+06	2.13358e+06	2.21564e+06	2.02266e+06	1.79695e+06	1.44355e+06	2.12396e+06	1.24481	1.47134	-1.18198	0.0106411	0.0685312	0.0109406	0.0685312
Q5JPE7	NOMO2	283820	Nodal modulator 2 [OS=Homo sapiens]		816968	827350	750641	766837	768042	616331	783710	867195	750738	798320	717070	800548	1.11331	1.11641	-1.00279	0.28237	0.270909	0.270909	0.96821
P33992	MCM5	4174	DNA replication licensing factor MCM5 [OS=Homo sapiens]	cell differentiation;cell growth;cell proliferation;cellular homeostasis;coagulation	4.36262e+06	4.44737e+06	4.38375e+06	2.45888e+06	2.30779e+06	2.18672e+06	3.73005e+06	4.10198e+06	3.6143e+06	4.39791e+06	2.3178e+06	3.81544e+06	1.89745	1.64615	1.15266	1.40724e-05	1.59955e-05	5.39708e-05	0.0055211
P49755	TMED10	10972	Transmembrane emp24 domain-containing protein 10 [OS=Homo sapiens]	cell growth;conjugation;defense response;metabolic process	4.99544e+06	4.2577e+06	4.56931e+06	5.82022e+06	4.92638e+06	5.06959e+06	3.88362e+06	4.06347e+06	3.85646e+06	4.60748e+06	5.27207e+06	3.93452e+06	-1.14424	-1.33995	1.17104	0.0107697	0.062277	0.0110643	0.062277
Q969V3	NCLN	56926	Nicalin [OS=Homo sapiens]	cell organization and biogenesis;metabolic process	543911	550296	563989	597429	507028	541844	559149	546382	460678	552732	548767	522069	1.00722	-1.05114	1.05873	0.632184	0.909665	0.683879	0.683879
Q6P1M0	SLC27A4	10999	Long-chain fatty acid transport protein 4 [OS=Homo sapiens]	cellular homeostasis;conjugation;defense response;metabolic process	316803	302723	322860	322988	294703	257866	319748	339699	286848	314129	291852	315432	1.07633	1.08079	-1.00415	0.477391	0.477339	0.477339	0.951312
P35232	PHB	5245	Prohibitin [OS=Homo sapiens]	cell growth;cell organization and biogenesis;cell proliferation;cellular homeostasis;coagulation;development;metabolic process	8.09937e+06	7.10521e+06	7.52918e+06	7.11808e+06	4.82603e+06	7.16016e+06	6.54231e+06	5.99763e+06	5.31667e+06	7.57792e+06	6.36809e+06	5.9522e+06	1.18998	-1.06987	1.27313	0.148607	0.224054	0.590443	0.204159
Q92616	GCN1	10985	eIF-2-alpha kinase activator GCN1 [OS=Homo sapiens]	cell organization and biogenesis;cellular homeostasis;coagulation;metabolic process	4.06796e+06	4.07202e+06	4.17423e+06	2.867e+06	2.74073e+06	2.78396e+06	3.95346e+06	3.89929e+06	3.58369e+06	4.10474e+06	2.79723e+06	3.81215e+06	1.46743	1.36283	1.07675	3.46862e-05	4.36477e-05	9.38339e-05	0.0294047
Q14566	MCM6	4175	DNA replication licensing factor MCM6 [OS=Homo sapiens]	cell differentiation;cell growth;cell proliferation;cellular homeostasis;coagulation	3.28679e+06	3.67614e+06	3.35865e+06	1.87404e+06	1.85832e+06	1.72067e+06	2.74104e+06	3.22943e+06	2.75022e+06	3.44053e+06	1.81768e+06	2.9069e+06	1.89282	1.59924	1.18357	0.000202697	0.000216741	0.000981728	0.0194917
O60701	UGDH	7358	UDP-glucose 6-dehydrogenase [OS=Homo sapiens]	cell growth;cell organization and biogenesis;cellular homeostasis;defense response	1.72278e+06	1.67949e+06	1.62072e+06	1.70383e+06	1.84235e+06	1.6633e+06	1.41582e+06	1.55288e+06	1.5378e+06	1.67433e+06	1.7365e+06	1.50217e+06	-1.03713	-1.15599	1.11461	0.0216626	0.351993	0.0268153	0.0471188
Q7Z7M9	GALNT5	11227	Polypeptide N-acetylgalactosaminyltransferase 5 [OS=Homo sapiens]	cell organization and biogenesis;cellular homeostasis	210693	192962	206760	140472	106832	147199	116822	114371	109696	203472	131501	113630	1.5473	-1.15728	1.79065	0.000459848	0.00102118	0.162634	0.000610416
P36776	LONP1	9361	Lon protease homolog, mitochondrial [OS=Homo sapiens]	cell growth;cell organization and biogenesis;cell proliferation;cellular homeostasis;coagulation;metabolic process	2.00482e+06	2.5434e+06	2.11817e+06	1.77643e+06	1.4717e+06	1.39452e+06	1.79211e+06	1.54319e+06	1.65091e+06	2.22213e+06	1.54755e+06	1.66207e+06	1.4359	1.074	1.33696	0.0174726	0.0249027	0.535933	0.0275511
Q04837	SSBP1	6742	Single-stranded DNA-binding protein, mitochondrial [OS=Homo sapiens]	cell growth;cellular homeostasis;metabolic process	2.83948e+06	2.97142e+06	2.85716e+06	2.52198e+06	2.51984e+06	2.35134e+06	2.74238e+06	2.7114e+06	2.49403e+06	2.88935e+06	2.46439e+06	2.64927e+06	1.17244	1.07502	1.09062	0.00743356	0.00765409	0.0742795	0.0466028
Q07666	KHDRBS1	10657	KH domain-containing, RNA-binding, signal transduction-associated protein 1 [OS=Homo sapiens]	cell differentiation;cellular component movement;cellular homeostasis;development;metabolic process	1.93216e+06	2.37614e+06	2.12603e+06	1.61093e+06	1.24712e+06	1.6104e+06	1.73102e+06	1.45812e+06	1.65525e+06	2.14477e+06	1.48948e+06	1.6148e+06	1.43994	1.08413	1.3282	0.0135001	0.0185004	0.460004	0.0234795
Q99856	ARID3A	1820	AT-rich interactive domain-containing protein 3A [OS=Homo sapiens]	metabolic process	2.33311e+06	2.40942e+06	2.38041e+06	2.25079e+06	1.91238e+06	1.89497e+06	2.37281e+06	2.45707e+06	2.4173e+06	2.37431e+06	2.01938e+06	2.41573e+06	1.17576	1.19627	-1.01744	0.0128129	0.016845	0.016845	0.688249
Q5QNW6	H2BC18	440689	Histone H2B type 2-F [OS=Homo sapiens]	cell growth	1.2051e+07	5.12586e+07	4.1795e+07	3.20856e+07	4.72074e+06	5.55892e+07	6.06812e+07	54783053	4.96166e+07	3.50349e+07	3.07985e+07	5.50269e+07	1.13755	1.78667	-1.57063	0.322814	0.795268	0.371596	0.371596
O43169	CYB5B	80777	Cytochrome b5 type B [OS=Homo sapiens]	cellular homeostasis;coagulation	646148	811754	692373	1.29222e+06	1.03542e+06	1.05037e+06	862536	712890	764482	716758	1.126e+06	779970	-1.57097	-1.44365	-1.08819	0.00671476	0.00979402	0.0108097	0.493612
Q9Y6Q5	AP1M2	10053	AP-1 complex subunit mu-2 [OS=Homo sapiens]	conjugation	945925	887072	1.01931e+06	645473	622189	577215	766315	806497	812285	950767	614959	795032	1.54607	1.29282	1.19588	0.000319921	0.000309473	0.00430565	0.00575631
P31930	UQCRC1	7384	Cytochrome b-c1 complex subunit 1, mitochondrial [OS=Homo sapiens]	cellular homeostasis;conjugation;metabolic process	4.6834e+06	4.6661e+06	4.38785e+06	3.39609e+06	2.38657e+06	3.04469e+06	3.46286e+06	3.39105e+06	3.30178e+06	4.57912e+06	2.94245e+06	3.38523e+06	1.55622	1.15048	1.35267	0.00178228	0.00210117	0.135371	0.00525574
Q7Z2K6	ERMP1	79956	Endoplasmic reticulum metallopeptidase 1 [OS=Homo sapiens]	cell organization and biogenesis;coagulation;development	858205	801974	791583	1.50467e+06	1.48701e+06	1.34091e+06	504533	529062	424839	817254	1.4442e+06	486145	-1.76713	-2.97071	1.68109	4.97258e-06	3.08272e-05	5.14635e-06	0.000730335
P05141	SLC25A5	292	ADP/ATP translocase 2 [OS=Homo sapiens]	cell growth;cellular homeostasis;conjugation;defense response;metabolic process	7.38827e+07	6.15711e+07	6.44016e+07	4.69175e+07	3.82691e+07	4.0391e+07	4.84927e+07	4.86408e+07	4.65629e+07	6.66184e+07	4.18592e+07	4.78988e+07	1.59149	1.14428	1.39082	0.00141566	0.00173841	0.158283	0.00370209
P16278	GLB1	2720	Beta-galactosidase [OS=Homo sapiens]	cellular homeostasis;metabolic process	571676	660006	567575	339413	408240	354167	427154	315870	421097	599753	367273	388040	1.63299	1.05654	1.54559	0.00263425	0.00355241	0.638934	0.00355241
Q9HC38	GLOD4	51031	Glyoxalase domain-containing protein 4 [OS=Homo sapiens]		1.09391e+06	1.26366e+06	993016	1.23556e+06	1.79515e+06	1.13112e+06	1.19655e+06	1.10456e+06	1.22045e+06	1.11686e+06	1.38728e+06	1.17385e+06	-1.24212	-1.18182	-1.05103	0.359364	0.430011	0.430011	0.76545
Q15020	SART3	9733	Squamous cell carcinoma antigen recognized by T-cells 3 [OS=Homo sapiens]	cell differentiation;cell growth;cellular component movement;cellular homeostasis;defense response;metabolic process	536641	558098	548244	476542	390732	407832	434275	435198	485375	547661	425035	451616	1.28851	1.06254	1.21267	0.00746851	0.00974122	0.34541	0.0151429
Q06203	PPAT	5471	Amidophosphoribosyltransferase [OS=Homo sapiens]	cell differentiation;cellular homeostasis;conjugation;defense response;metabolic process	1.32543e+06	1.10852e+06	1.19588e+06	1.34518e+06	1.53564e+06	1.10677e+06	1.24135e+06	1.50749e+06	1.27529e+06	1.20994e+06	1.32919e+06	1.34138e+06	-1.09856	1.00917	-1.10863	0.578543	0.604452	0.929762	0.604452
Q9UNL2	SSR3	6747	Translocon-associated protein subunit gamma [OS=Homo sapiens]	conjugation	127590	143633	166918	170045	159059	170387	151880	70156.3	114658	146047	166497	112232	-1.14002	-1.48351	1.3013	0.112815	0.381072	0.138079	0.253668
P07942	LAMB1	3912	Laminin subunit beta-1 [OS=Homo sapiens]	cell communication;cell growth;defense response;metabolic process	1.94325e+06	2.48955e+06	2.03327e+06	8.83849e+07	7.97477e+06	1.14319e+08	1.40044e+06	1.30351e+06	1.47963e+06	2.15536e+06	7.02264e+07	1.39452e+06	-32.5822	-50.3586	1.54559	0.0621867	0.0606538	0.0606538	0.977723
Q14651	PLS1	5357	Plastin-1 [OS=Homo sapiens]	cell growth;conjugation;defense response;metabolic process	463090	538113	451962	450828	573596	433196	314293	273754	357265	484388	485873	315104	-1.00307	-1.54195	1.53723	0.0161835	0.975633	0.0164558	0.0164558
P61619	SEC61A1	29927	Protein transport protein Sec61 subunit alpha isoform 1 [OS=Homo sapiens]	cell growth;coagulation;conjugation;defense response	2.19648e+06	2.18882e+06	2.03095e+06	2.05902e+06	2.07121e+06	1.78267e+06	2.03682e+06	2.0954e+06	1.80171e+06	2.13875e+06	1.97096e+06	1.97797e+06	1.08513	1.00356	1.08128	0.325277	0.317426	0.953375	0.317426
Q92544	TM9SF4	9777	Transmembrane 9 superfamily member 4 [OS=Homo sapiens]	cell communication;cell growth;coagulation;conjugation;metabolic process	242096	278815	250472	191236	226239	165494	155683	182262	164679	257127	194323	167541	1.32319	-1.15985	1.53471	0.00679931	0.0202018	0.190542	0.00784783
A5YKK6	CNOT1	23019	CCR4-NOT transcription complex subunit 1 [OS=Homo sapiens]	cellular component movement;cellular homeostasis;defense response;metabolic process	453688	431064	442483	328810	258730	356534	446373	474562	437795	442411	314692	452910	1.40586	1.43922	-1.02373	0.00311753	0.00400607	0.00400607	0.700224
Q15056	EIF4H	7458	Eukaryotic translation initiation factor 4H [OS=Homo sapiens]	cell growth;cell organization and biogenesis;cellular homeostasis;metabolic process	2.29265e+06	2.52523e+06	2.34175e+06	2.47098e+06	2.66942e+06	2.30363e+06	3.15008e+06	3.09949e+06	2.76275e+06	2.38654e+06	2.48134e+06	3.00411e+06	-1.03972	1.21068	-1.25877	0.0104612	0.533868	0.0162794	0.0153049
Q9UBX3	SLC25A10	1468	Mitochondrial dicarboxylate carrier [OS=Homo sapiens]	cellular homeostasis;conjugation	217551	188669	185692	116377	124438	117941	129120	115069	101434	197304	119585	115208	1.6499	-1.038	1.71259	0.000423469	0.00053166	0.697855	0.00053166
Q8NBN3	TMEM87A	25963	Transmembrane protein 87A [OS=Homo sapiens]	conjugation	65952.8	92704.8	56821.6	72971.3	115189	54792.5	77994.5	53960	74352.9	71826.4	80984.2	68769.1	-1.1275	-1.17762	1.04446	0.789132	0.87148	0.87148	0.87148
P13073	COX4I1	1327	Cytochrome c oxidase subunit 4 isoform 1, mitochondrial [OS=Homo sapiens]	cellular homeostasis;conjugation;metabolic process	5.03003e+06	5.38848e+06	5.16124e+06	2.68497e+06	2.28812e+06	2.66114e+06	4.94176e+06	4.5343e+06	4.48054e+06	5.19325e+06	2.54474e+06	4.6522e+06	2.04077	1.82816	1.1163	1.42714e-05	1.86594e-05	3.52859e-05	0.0239021
P63244	RACK1	10399	Receptor of activated protein C kinase 1 [OS=Homo sapiens]	cell differentiation;cell organization and biogenesis;cellular homeostasis;defense response;metabolic process	1.88671e+07	1.82076e+07	1.65495e+07	1.38914e+07	1.26158e+07	1.30887e+07	1.85941e+07	1.91715e+07	1.69895e+07	1.78747e+07	1.31986e+07	1.82517e+07	1.35429	1.38285	-1.02109	0.00156201	0.00204156	0.00204156	0.666646
P30040	ERP29	10961	Endoplasmic reticulum resident protein 29 [OS=Homo sapiens]	conjugation;metabolic process	6.22363e+06	5.96916e+06	6.16039e+06	6.30148e+06	7.94715e+06	6.48979e+06	4.78242e+06	5.23777e+06	4.5852e+06	6.11773e+06	6.9128e+06	4.86846e+06	-1.12996	-1.41992	1.2566	0.0118485	0.132724	0.0126989	0.051133
Q9Y2Q3	GSTK1	373156	Glutathione S-transferase kappa 1 [OS=Homo sapiens]	cellular homeostasis;metabolic process	684755	314395	673279	573789	728976	757010	625380	529332	423767	557477	686592	526159	-1.23161	-1.30491	1.05952	0.417832	0.482149	0.482149	0.80203
Q5BJD5	TMEM41B	440026	Transmembrane protein 41B [OS=Homo sapiens]	cell growth;cellular homeostasis;defense response	3.84014e+06	3.21756e+06	3.31353e+06	2.06664e+06	2.78516e+06	2.47293e+06	2.09992e+06	1.79246e+06	1.91792e+06	3.45708e+06	2.44158e+06	1.93677e+06	1.41592	-1.26064	1.78497	0.00213956	0.00875566	0.0831858	0.00232843
Q9UJC3	HOOK1	51361	Protein Hook homolog 1 [OS=Homo sapiens]	cell growth;conjugation;metabolic process	778519	943785	699040	793125	950433	614980	618244	587994	610171	807115	786179	605470	1.02663	-1.29846	1.33304	0.161028	0.839335	0.176098	0.176098
Q13867	BLMH	642	Bleomycin hydrolase [OS=Homo sapiens]	cell organization and biogenesis;cellular homeostasis;metabolic process	552694	486271	547584	502217	514693	477269	531902	518034	542704	528850	498060	530880	1.06182	1.0659	-1.00384	0.274304	0.274366	0.274366	0.924152
O95197	RTN3	10313	Reticulon-3 [OS=Homo sapiens]	cell growth;conjugation;metabolic process	1.6197e+06	1.67769e+06	1.60179e+06	2.05279e+06	2.32993e+06	1.71129e+06	1.37582e+06	1.47646e+06	1.34613e+06	1.63306e+06	2.03134e+06	1.39947e+06	-1.24389	-1.4515	1.16691	0.0156901	0.0576554	0.0172185	0.172232
Q27J81	INF2	64423	Inverted formin-2 [OS=Homo sapiens]	cell growth;metabolic process	4.42535e+06	4.28093e+06	3.96851e+06	4.57673e+06	5.14423e+06	3.99109e+06	3.72538e+06	3.91453e+06	3.72914e+06	4.22493e+06	4.57068e+06	3.78969e+06	-1.08184	-1.20609	1.11485	0.100275	0.289514	0.118146	0.289514
Q13162	PRDX4	10549	Peroxiredoxin-4 [OS=Homo sapiens]	cell growth;cell organization and biogenesis;cellular homeostasis;coagulation;defense response;development;metabolic process	2.15322e+06	2.38404e+06	2.10503e+06	3.04892e+06	3.62604e+06	2.69984e+06	2.19148e+06	1.98228e+06	2.04527e+06	2.2141e+06	3.12493e+06	2.07301e+06	-1.41138	-1.50744	1.06806	0.00864413	0.0127674	0.0127674	0.573241
P09382	LGALS1	3956	Galectin-1 [OS=Homo sapiens]	coagulation;defense response;metabolic process	1.65617e+06	1.56656e+06	1.52905e+06	4.66504e+06	1.08545e+06	4.75138e+06	1.82913e+06	1.93907e+06	1.85061e+06	1.58393e+06	3.50062e+06	1.87294e+06	-2.21009	-1.86906	-1.18246	0.192924	0.225357	0.225357	0.779538
P17858	PFKL	5211	ATP-dependent 6-phosphofructokinase, liver type [OS=Homo sapiens]	cellular homeostasis;metabolic process	5.08839e+06	4.86666e+06	5.10487e+06	4.52635e+06	4.54447e+06	4.44783e+06	4.15387e+06	4.32682e+06	4.15058e+06	5.01997e+06	4.50622e+06	4.21042e+06	1.11401	-1.07025	1.19227	0.000186439	0.00117623	0.0114641	0.000191236
P35606	COPB2	9276	Coatomer subunit beta' [OS=Homo sapiens]	conjugation	2.76354e+06	2.76815e+06	2.36486e+06	2.90288e+06	2.67596e+06	2.34468e+06	2.66355e+06	2.60105e+06	2.53959e+06	2.63218e+06	2.64117e+06	2.6014e+06	-1.00341	-1.01529	1.01184	0.9718	0.960487	0.960487	0.960487
P46977	STT3A	3703	Dolichyl-diphosphooligosaccharide--protein glycosyltransferase subunit STT3A [OS=Homo sapiens]	cell organization and biogenesis;cellular homeostasis	2.19556e+06	2.27809e+06	2.05409e+06	2.56272e+06	2.59885e+06	2.25213e+06	1.74708e+06	1.82993e+06	1.62279e+06	2.17591e+06	2.47123e+06	1.73327e+06	-1.13572	-1.42577	1.25538	0.00203288	0.0430927	0.00207563	0.0129532
P30038	ALDH4A1	8659	Delta-1-pyrroline-5-carboxylate dehydrogenase, mitochondrial [OS=Homo sapiens]	cellular homeostasis	413770	398764	371554	377223	386097	337942	273588	292858	270928	394696	367087	279124	1.07521	-1.31514	1.41405	0.00110002	0.149777	0.00284924	0.00136028
Q9H4A6	GOLPH3	64083	Golgi phosphoprotein 3 [OS=Homo sapiens]	cell communication;cell growth;cell organization and biogenesis;cellular homeostasis;conjugation;metabolic process	496162	524383	559504	464573	603443	501121	523482	536438	419655	526683	523046	493192	1.00695	-1.06053	1.06791	0.754421	0.94183	0.833001	0.833001
Q13564	NAE1	8883	NEDD8-activating enzyme E1 regulatory subunit [OS=Homo sapiens]	cell differentiation;cell organization and biogenesis;cellular homeostasis;development;metabolic process	640866	667371	524111	401867	668430	422482	560773	489197	451369	610783	497593	500446	1.22748	1.00573	1.22048	0.360907	0.346977	0.973643	0.346977
P49720	PSMB3	5691	Proteasome subunit beta type-3 [OS=Homo sapiens]	cell organization and biogenesis;cellular homeostasis	1.78081e+06	1.96327e+06	1.8335e+06	1.89293e+06	1.73173e+06	1.88492e+06	1.97341e+06	1.97965e+06	1.79297e+06	1.8592e+06	1.83652e+06	1.91534e+06	1.01235	1.04292	-1.0302	0.617253	0.784605	0.758357	0.758357
Q9BTV4	TMEM43	79188	Transmembrane protein 43 [OS=Homo sapiens]	cell growth	1.01538e+06	1.03199e+06	983725	1.60919e+06	1.29752e+06	1.62404e+06	793135	780558	727388	1.01037e+06	1.51025e+06	767027	-1.49475	-1.96896	1.31725	0.000452339	0.00206494	0.0004871	0.0342923
Q53EL6	PDCD4	27250	Programmed cell death protein 4 [OS=Homo sapiens]	defense response;development;metabolic process	1.27355e+06	1.3175e+06	1.17707e+06	1.95493e+06	1.58676e+06	1.72551e+06	1.54418e+06	1.5414e+06	1.55225e+06	1.25604e+06	1.75573e+06	1.54595e+06	-1.39783	-1.1357	-1.23081	0.0052608	0.00540783	0.0671099	0.0323293
O15427	SLC16A3	9123	Monocarboxylate transporter 4 [OS=Homo sapiens]	conjugation	552361	533230	548782	967380	971204	940450	544784	542612	449976	544791	959678	512457	-1.76155	-1.8727	1.0631	5.31195e-06	7.41551e-06	7.41551e-06	0.278424
P26572	MGAT1	4245	Alpha-1,3-mannosyl-glycoprotein 2-beta-N-acetylglucosaminyltransferase [OS=Homo sapiens]	cell organization and biogenesis;cellular homeostasis;defense response;metabolic process	13077.1	12554.2	9599.17	7040.91	8552.7	7580.23	11828.6	12784.7	8861.93	11743.5	7724.61	11158.4	1.52027	1.44453	1.05243	0.0504461	0.0669981	0.0669981	0.681447
P00367	GLUD1	2746	Glutamate dehydrogenase 1, mitochondrial [OS=Homo sapiens]	cellular homeostasis;metabolic process	2.79205e+06	2.80738e+06	2.60172e+06	2.3633e+06	2.81981e+06	2.18425e+06	1.60997e+06	1.56571e+06	1.81647e+06	2.73371e+06	2.45579e+06	1.66405e+06	1.11317	-1.47579	1.64281	0.00221152	0.164157	0.00606509	0.00265611
Q12907	LMAN2	10960	Vesicular integral-membrane protein VIP36 [OS=Homo sapiens]	cell growth;conjugation;metabolic process	1.68209e+06	2.01616e+06	1.64456e+06	1.13148e+06	1.36835e+06	1.05299e+06	1.79466e+06	1.7119e+06	1.70413e+06	1.78093e+06	1.18427e+06	1.73689e+06	1.50382	1.46663	1.02536	0.00554321	0.00692977	0.00692977	0.738419
P18754	RCC1	1104	Regulator of chromosome condensation [OS=Homo sapiens]	cell differentiation;cell growth;metabolic process	671924	906966	755536	569119	442808	522036	701211	644607	618853	778142	511321	654890	1.52183	1.28078	1.1882	0.0202467	0.0214083	0.112479	0.114306
P27708	CAD	790	CAD protein [OS=Homo sapiens]	cell organization and biogenesis;cellular homeostasis;coagulation;conjugation;defense response;metabolic process	2.17595e+06	2.12718e+06	2.03903e+06	1.31232e+06	1.28005e+06	1.41581e+06	1.74978e+06	1.77612e+06	1.72424e+06	2.11406e+06	1.33606e+06	1.75005e+06	1.5823	1.30985	1.208	1.15706e-05	1.0985e-05	0.000208972	0.000284526
P48735	IDH2	3418	Isocitrate dehydrogenase [NADP], mitochondrial [OS=Homo sapiens]	cellular homeostasis;defense response;metabolic process	1.15143e+07	1.08377e+07	9.80549e+06	2.02763e+07	2.33646e+07	1.67664e+07	8.39768e+06	8.9855e+06	8.71766e+06	1.07192e+07	2.01357e+07	8.70028e+06	-1.87848	-2.31438	1.23205	0.000856232	0.00167618	0.0011906	0.257614
Q15417	CNN3	1266	Calponin-3 [OS=Homo sapiens]	cell growth;metabolic process	1.91787e+06	2.03109e+06	1.72143e+06	1.6671e+06	2.04697e+06	1.41372e+06	1.40161e+06	1.35903e+06	1.48056e+06	1.89013e+06	1.70926e+06	1.41374e+06	1.10581	-1.20904	1.33698	0.0785215	0.328105	0.198996	0.0930566
Q9Y639	NPTN	27020	Neuroplastin [OS=Homo sapiens]	cell communication;cell death;cell growth;defense response;metabolic process	219979	253565	182871	139619	212768	100319	184621	189693	150267	218805	150902	174860	1.44998	1.15877	1.25131	0.197799	0.260954	0.497959	0.351174
Q13813	SPTAN1	6709	Spectrin alpha chain, non-erythrocytic 1 [OS=Homo sapiens]	cell growth	2.02229e+06	2.51769e+06	2.06179e+06	2.36766e+06	802716	2.13414e+06	1.26777e+06	1.27479e+06	1.55069e+06	2.20059e+06	1.76817e+06	1.36441e+06	1.24456	-1.29592	1.61285	0.225043	0.379258	0.379258	0.290908
Q14203	DCTN1	1639	Dynactin subunit 1 [OS=Homo sapiens]	cell differentiation;cell growth;conjugation;defense response;metabolic process	1.01096e+06	1.27183e+06	1.1787e+06	1.08693e+06	1.08772e+06	847608	921185	1.0533e+06	948222	1.15383e+06	1.00742e+06	974237	1.14533	-1.03406	1.18434	0.218584	0.267327	0.74149	0.267327
O96019	ACTL6A	86	Actin-like protein 6A [OS=Homo sapiens]	cell growth;cell organization and biogenesis;cell proliferation;cellular homeostasis;coagulation;defense response;development;metabolic process	1.42348e+06	1.60782e+06	1.52402e+06	1.56615e+06	1.18109e+06	1.28282e+06	1.85737e+06	1.6846e+06	1.79587e+06	1.51844e+06	1.34335e+06	1.77928e+06	1.13034	1.32451	-1.17178	0.021837	0.167591	0.0237433	0.0869898
Q8WY22	BRI3BP	140707	BRI3-binding protein [OS=Homo sapiens]		14912.6	61492	13859.2	36767.8	33264.9	39555.9	44208.1	12271.5	44622.8	30087.9	36529.6	33700.8	-1.21409	-1.08394	-1.12008	0.91894	0.86203	0.86203	0.86203
Q5XKP0	MICOS13	125988	MICOS complex subunit MIC13 [OS=Homo sapiens]	cell growth	225663	214016	216061	164538	140721	209148	213074	231272	169101	218580	171469	204482	1.27475	1.19253	1.06894	0.179195	0.241775	0.287593	0.553084
Q15642	TRIP10	9322	Cdc42-interacting protein 4 [OS=Homo sapiens]	cell growth;conjugation;development;metabolic process	658026	808043	658212	1.15326e+06	7.90657e+06	770354	590671	585788	589775	708094	3.27673e+06	588745	-4.62753	-5.56561	1.20272	0.342563	0.335361	0.335361	0.951769
P08648	ITGA5	3678	Integrin alpha-5 [OS=Homo sapiens]	cell communication;coagulation;defense response;development;metabolic process	699338	590384	520566	1.13238e+06	1.04124e+06	907334	555191	462840	396668	603429	1.02699e+06	471566	-1.70192	-2.17782	1.27963	0.000924824	0.00240169	0.00114544	0.141232
O95747	OXSR1	9943	Serine/threonine-protein kinase OSR1 [OS=Homo sapiens]	cell organization and biogenesis;cellular homeostasis;coagulation;development;metabolic process	861820	868909	845733	1.08436e+06	1.21355e+06	1.00171e+06	1.054e+06	935770	950367	858821	1.09987e+06	980046	-1.28068	-1.12227	-1.14115	0.0185675	0.0194739	0.0887996	0.0887996
P13473	LAMP2	3920	Lysosome-associated membrane glycoprotein 2 [OS=Homo sapiens]	cell growth;cell organization and biogenesis;cellular homeostasis;coagulation;conjugation;metabolic process	2.04238e+06	3.27689e+06	1.79282e+06	1.06539e+06	1.76797e+06	778456	1.80994e+06	1.42877e+06	1.76938e+06	2.3707e+06	1.20394e+06	1.66937e+06	1.96912	1.38659	1.42012	0.106831	0.128657	0.346487	0.262076
Q9UHQ9	CYB5R1	51706	NADH-cytochrome b5 reductase 1 [OS=Homo sapiens]	cellular homeostasis;conjugation	1.56272e+06	1.74613e+06	1.55235e+06	956098	890075	776385	1.11379e+06	1.21063e+06	1.06425e+06	1.6204e+06	874186	1.12956e+06	1.85361	1.29213	1.43454	0.000177407	0.000186521	0.0148589	0.000949588
Q96SU4	OSBPL9	114883	Oxysterol-binding protein-related protein 9 [OS=Homo sapiens]	cellular homeostasis;conjugation	670665	704749	669614	533671	384724	366887	584498	659426	772593	681676	428427	672172	1.59111	1.56893	1.01414	0.0111057	0.0122467	0.0122467	0.884692
P08574	CYC1	1537	Cytochrome c1, heme protein, mitochondrial [OS=Homo sapiens]	cellular homeostasis;conjugation;metabolic process	1.38145e+06	1.39916e+06	1.49385e+06	2.12243e+06	1.3343e+06	1.64322e+06	1.33218e+06	1.32538e+06	1.14154e+06	1.42482e+06	1.69999e+06	1.26636e+06	-1.19312	-1.34241	1.12513	0.161959	0.315216	0.207095	0.449923
O15260	SURF4	6836	Surfeit locus protein 4 [OS=Homo sapiens]	cell growth;metabolic process	1.46225e+06	1.54503e+06	1.13497e+06	1.57391e+06	1.48074e+06	1.24944e+06	1.19089e+06	1.291e+06	1.16885e+06	1.38075e+06	1.4347e+06	1.21691e+06	-1.03907	-1.17897	1.13463	0.303843	0.698308	0.394375	0.394375
Q9BYC5	FUT8	2530	Alpha-(1,6)-fucosyltransferase [OS=Homo sapiens]	cell organization and biogenesis;cellular homeostasis;defense response;development;metabolic process	262189	239078	229341	318260	315175	281388	193802	204721	194724	243536	304941	197749	-1.25214	-1.54206	1.23154	0.000484572	0.00455115	0.000477648	0.0117686
P05787	KRT8	3856	Keratin, type II cytoskeletal 8 [OS=Homo sapiens]	cell growth;coagulation;defense response;development;metabolic process	1.58789e+08	1.05563e+08	1.38647e+08	8.13066e+07	9.2271e+07	9.31306e+07	6.78322e+07	6.47693e+07	7.22166e+07	1.34333e+08	8.89027e+07	6.82727e+07	1.51101	-1.30217	1.9676	0.00636802	0.0204144	0.168093	0.00722157
Q9NSB2	KRT84	3890	Keratin, type II cuticular Hb4 [OS=Homo sapiens]	cell growth;defense response;metabolic process	4.33742e+06	2.79042e+06	3.43914e+06	1.96087e+06	2.82538e+06	1.98794e+06	1.57084e+06	1.39999e+06	1.48655e+06	3.52233e+06	2.25806e+06	1.48579e+06	1.55989	-1.51977	2.37067	0.00950743	0.0407399	0.126343	0.0101946
P07954	FH	2271	Fumarate hydratase, mitochondrial [OS=Homo sapiens]	cell proliferation;cellular homeostasis;coagulation;metabolic process	4.87748e+06	5.1883e+06	4.73509e+06	3.36401e+06	3.87699e+06	3.03334e+06	4.23612e+06	4.18718e+06	3.90342e+06	4.93363e+06	3.42478e+06	4.10891e+06	1.44057	1.19976	1.20071	0.00244679	0.0024387	0.0307462	0.0220742
P00846	MT-ATP6	4508	ATP synthase subunit a [OS=Homo sapiens]	cellular homeostasis;coagulation;conjugation;metabolic process	554316	483451	443947	473500	360336	437302	370302	356115	375988	493905	423713	367469	1.16566	-1.15306	1.34407	0.0440405	0.173859	0.191504	0.0487077
Q9NVH1	DNAJC11	55735	DnaJ homolog subfamily C member 11 [OS=Homo sapiens]	cell growth	165755	172122	162421	125878	39916.2	77053.6	120493	119507	115864	166766	80949.4	118621	2.06012	1.46538	1.40587	0.0163688	0.017276	0.115588	0.0856064
Q9BWH2	FUNDC2	65991	FUN14 domain-containing protein 2 [OS=Homo sapiens]	cell growth;cellular homeostasis	95206.8	39820.4	44600.7	121815	124848	66367.5	102044	49528.5	42407.4	59876	104343	64659.8	-1.74266	-1.61373	-1.0799	0.253961	0.270749	0.270749	0.861082
Q9Y6M9	NDUFB9	4715	NADH dehydrogenase [ubiquinone] 1 beta subcomplex subunit 9 [OS=Homo sapiens]	cell growth;cellular homeostasis;conjugation;metabolic process	419309	582370	475001	516968	672622	461172	438434	390176	405202	492227	550254	411271	-1.11789	-1.33794	1.19684	0.186551	0.411834	0.237484	0.397011
Q9Y312	AAR2	25980	Protein AAR2 homolog [OS=Homo sapiens]	cell growth;cellular component movement;cellular homeostasis	26391	24615.2	16281.8	18110.3	26280.4	22721	48221.7	47009.9	29800.5	22429.3	22370.6	41677.4	1.00263	1.86305	-1.85816	0.0244869	0.992262	0.0242757	0.0242757
P11279	LAMP1	3916	Lysosome-associated membrane glycoprotein 1 [OS=Homo sapiens]	conjugation;development;metabolic process	2.81846e+06	2.58199e+06	2.49069e+06	1.67306e+06	1.40878e+06	1.47317e+06	1.38443e+06	2.08885e+06	1.37678e+06	2.63038e+06	1.51834e+06	1.61668e+06	1.73241	1.06477	1.62702	0.00401361	0.00531336	0.668429	0.00531336
O60547	GMDS	2762	GDP-mannose 4,6 dehydratase [OS=Homo sapiens]	cellular homeostasis;development	52638.1	57531	47953.4	30902.1	42264.8	48062.6	48774.9	55559.5	51812.6	52707.5	40409.8	52049	1.30432	1.28803	1.01265	0.0825053	0.0859607	0.0859607	0.898714
P18206	VCL	7414	Vinculin [OS=Homo sapiens]	cell communication;cell growth;defense response;metabolic process	2.58109e+06	2.41026e+06	2.45662e+06	3.6802e+06	7.70317e+06	6.28619e+06	1.0333e+07	7.66709e+06	6.30765e+06	2.48266e+06	5.88985e+06	8.10259e+06	-2.3724	1.37569	-3.26368	0.0171938	0.0698832	0.155726	0.0186071
[truncated: 1,637 more rows]
