# Supplementary material for: Controlling placental spheroid growth and phenotype using engineered synthetic hydrogel matrices
Source: Royal Society of Chemistry journal article supplement (doi:10.1039/d3bm01393f), 2024-01-01
Supplement: d3bm01393f3.xlsx [file d3bm01393f3.xlsx]

## Sheet: Cluster1_Matrigel_high
GroupID	Category	Term	Description	LogP	Log(q-value)	InTerm_InList	Genes	Symbols
1_Summary	Reactome Gene Sets	R-HSA-6798695	Neutrophil degranulation	-19.7515	-15.4021	37/482	226,230,302,847,961,1476,1508,1650,1727,1778,1992,2495,2548,2934,3043,3163,4282,5223,5315,5660,5869,5870,6282,6286,6515,8566,8895,9218,9761,10120,10549,10857,22931,23406,51552,57153,196527	ALDOA,ALDOC,ANXA2,CAT,CD47,CSTB,CTSB,DDOST,CYB5R3,DYNC1H1,SERPINB1,FTH1,GAA,GSN,HBB,HMOX2,MIF,PGAM1,PKM,PSAP,RAB5B,RAB6A,S100A11,S100P,SLC2A3,PDXK,CPNE3,VAPA,MLEC,ACTR1B,PRDX4,PGRMC1,RAB18,COTL1,RAB14,SLC44A2,ANO6
1_Member	Reactome Gene Sets	R-HSA-6798695	Neutrophil degranulation	-19.7515	-15.4021	37/482	226,230,302,847,961,1476,1508,1650,1727,1778,1992,2495,2548,2934,3043,3163,4282,5223,5315,5660,5869,5870,6282,6286,6515,8566,8895,9218,9761,10120,10549,10857,22931,23406,51552,57153,196527	ALDOA,ALDOC,ANXA2,CAT,CD47,CSTB,CTSB,DDOST,CYB5R3,DYNC1H1,SERPINB1,FTH1,GAA,GSN,HBB,HMOX2,MIF,PGAM1,PKM,PSAP,RAB5B,RAB6A,S100A11,S100P,SLC2A3,PDXK,CPNE3,VAPA,MLEC,ACTR1B,PRDX4,PGRMC1,RAB18,COTL1,RAB14,SLC44A2,ANO6
2_Summary	KEGG Pathway	hsa01200	Carbon metabolism	-17.7914	-13.743	20/115	51,226,230,847,2023,2597,2746,3099,3418,4329,5096,5223,5230,5315,5631,6389,6390,7167,9563,26007,2530,2548,2632,2739,3939,4351,5210,6513,6515,6520,6652,7165,7358,9526,9761,10314,23193,23275,54187,100,523,525,2773,3295,5636,9497,9524,10135,25819,221264,37,444,1355,2631,5447,8974,10954,6566,9123,587,29920,501,5352,6009,801,375790,10397,5604,581,10935	ACOX1,ALDOA,ALDOC,CAT,ENO1,GAPDH,GLUD1,HK2,IDH2,ALDH6A1,PCCB,PGAM1,PGK1,PKM,PRPS1,SDHA,SDHB,TPI1,H6PD,TKFC,FUT8,GAA,GBE1,GLO1,LDHA,MPI,PFKFB4,SLC2A1,SLC2A3,SLC3A2,SORD,TPD52L2,UGDH,MPDU1,MLEC,LANCL1,GANAB,POFUT2,NANS,ADA,ATP6V1A,ATP6V1B1,GNAI3,HSD17B4,PRPSAP2,SLC4A7,TECR,NAMPT,NOCT,AK9,ACADVL,ASPH,COX15,NIPSNAP2,POR,P4HA2,PDIA5,SLC16A1,SLC16A3,BCAT2,PYCR2,ALDH7A1,PLOD2,RHEB,CALM1,AGRN,NDRG1,MAP2K…
2_Member	KEGG Pathway	hsa01200	Carbon metabolism	-17.7914	-13.743	20/115	51,226,230,847,2023,2597,2746,3099,3418,4329,5096,5223,5230,5315,5631,6389,6390,7167,9563,26007	ACOX1,ALDOA,ALDOC,CAT,ENO1,GAPDH,GLUD1,HK2,IDH2,ALDH6A1,PCCB,PGAM1,PGK1,PKM,PRPS1,SDHA,SDHB,TPI1,H6PD,TKFC
2_Member	GO Biological Processes	GO:0005975	carbohydrate metabolic process	-14.8317	-11.0843	31/467	226,230,2023,2530,2548,2597,2632,2739,3099,3418,3939,4351,5210,5223,5230,5315,6513,6515,6520,6652,7165,7167,7358,9526,9563,9761,10314,23193,23275,26007,54187	ALDOA,ALDOC,ENO1,FUT8,GAA,GAPDH,GBE1,GLO1,HK2,IDH2,LDHA,MPI,PFKFB4,PGAM1,PGK1,PKM,SLC2A1,SLC2A3,SLC3A2,SORD,TPD52L2,TPI1,UGDH,MPDU1,H6PD,MLEC,LANCL1,GANAB,POFUT2,TKFC,NANS
2_Member	WikiPathways	WP534	Glycolysis and gluconeogenesis	-13.2874	-9.78305	12/45	226,230,2023,2597,3099,3939,5223,5230,5315,6513,6515,7167	ALDOA,ALDOC,ENO1,GAPDH,HK2,LDHA,PGAM1,PGK1,PKM,SLC2A1,SLC2A3,TPI1
2_Member	WikiPathways	WP4629	Aerobic glycolysis	-13.038	-9.612	8/12	226,2023,2597,3939,5230,5315,6513,7167	ALDOA,ENO1,GAPDH,LDHA,PGK1,PKM,SLC2A1,TPI1
2_Member	GO Biological Processes	GO:0055086	nucleobase-containing small molecule metabolic process	-12.1131	-8.84286	31/590	100,226,230,523,525,2023,2530,2597,2773,3099,3295,3418,3939,4329,4351,5223,5230,5315,5631,5636,6389,6390,7167,7358,9497,9524,9563,10135,25819,54187,221264	ADA,ALDOA,ALDOC,ATP6V1A,ATP6V1B1,ENO1,FUT8,GAPDH,GNAI3,HK2,HSD17B4,IDH2,LDHA,ALDH6A1,MPI,PGAM1,PGK1,PKM,PRPS1,PRPSAP2,SDHA,SDHB,TPI1,UGDH,SLC4A7,TECR,H6PD,NAMPT,NOCT,NANS,AK9
2_Member	GO Biological Processes	GO:0006091	generation of precursor metabolites and energy	-12.0535	-8.81798	26/410	37,51,226,230,444,847,1355,2023,2548,2597,2631,2632,3099,3418,3939,5223,5230,5315,5447,6389,6390,7167,8974,9563,10954,221264	ACADVL,ACOX1,ALDOA,ALDOC,ASPH,CAT,COX15,ENO1,GAA,GAPDH,NIPSNAP2,GBE1,HK2,IDH2,LDHA,PGAM1,PGK1,PKM,POR,SDHA,SDHB,TPI1,P4HA2,H6PD,PDIA5,AK9
2_Member	GO Biological Processes	GO:0005996	monosaccharide metabolic process	-11.8943	-8.71306	18/177	226,230,2023,2530,2548,2597,3099,4351,5210,5230,5315,6513,6515,6652,7167,9563,23275,26007	ALDOA,ALDOC,ENO1,FUT8,GAA,GAPDH,HK2,MPI,PFKFB4,PGK1,PKM,SLC2A1,SLC2A3,SORD,TPI1,H6PD,POFUT2,TKFC
2_Member	GO Biological Processes	GO:0006757	ATP generation from ADP	-11.8864	-8.71306	11/44	226,230,2023,2597,3099,3939,5223,5230,5315,7167,221264	ALDOA,ALDOC,ENO1,GAPDH,HK2,LDHA,PGAM1,PGK1,PKM,TPI1,AK9
2_Member	GO Biological Processes	GO:0006090	pyruvate metabolic process	-11.1433	-8.11607	12/66	226,230,2023,2597,3099,3939,5223,5230,5315,6566,7167,9123	ALDOA,ALDOC,ENO1,GAPDH,HK2,LDHA,PGAM1,PGK1,PKM,SLC16A1,TPI1,SLC16A3
2_Member	GO Biological Processes	GO:0046031	ADP metabolic process	-11.024	-8.01698	11/52	226,230,2023,2597,3099,3939,5223,5230,5315,7167,221264	ALDOA,ALDOC,ENO1,GAPDH,HK2,LDHA,PGAM1,PGK1,PKM,TPI1,AK9
2_Member	GO Biological Processes	GO:0006163	purine nucleotide metabolic process	-10.9923	-8.00456	26/457	100,226,230,523,525,2023,2597,2773,3099,3295,3418,3939,5223,5230,5315,5631,5636,6389,6390,7167,9497,9524,9563,10135,25819,221264	ADA,ALDOA,ALDOC,ATP6V1A,ATP6V1B1,ENO1,GAPDH,GNAI3,HK2,HSD17B4,IDH2,LDHA,PGAM1,PGK1,PKM,PRPS1,PRPSAP2,SDHA,SDHB,TPI1,SLC4A7,TECR,H6PD,NAMPT,NOCT,AK9
2_Member	GO Biological Processes	GO:0016052	carbohydrate catabolic process	-10.7051	-7.75357	14/110	226,230,2023,2530,2548,2597,3099,3939,5223,5230,5315,6652,7167,26007	ALDOA,ALDOC,ENO1,FUT8,GAA,GAPDH,HK2,LDHA,PGAM1,PGK1,PKM,SORD,TPI1,TKFC
2_Member	GO Biological Processes	GO:0019318	hexose metabolic process	-10.6512	-7.73926	16/157	226,230,2023,2530,2548,2597,3099,4351,5210,5230,5315,6652,7167,9563,23275,26007	ALDOA,ALDOC,ENO1,FUT8,GAA,GAPDH,HK2,MPI,PFKFB4,PGK1,PKM,SORD,TPI1,H6PD,POFUT2,TKFC
2_Member	GO Biological Processes	GO:0006096	glycolytic process	-10.5146	-7.62757	10/43	226,230,2023,2597,3099,3939,5223,5230,5315,7167	ALDOA,ALDOC,ENO1,GAPDH,HK2,LDHA,PGAM1,PGK1,PKM,TPI1
2_Member	KEGG Pathway	hsa01230	Biosynthesis of amino acids	-10.4568	-7.58855	12/75	226,230,587,2023,2597,3418,5223,5230,5315,5631,7167,29920	ALDOA,ALDOC,BCAT2,ENO1,GAPDH,IDH2,PGAM1,PGK1,PKM,PRPS1,TPI1,PYCR2
2_Member	GO Biological Processes	GO:0009144	purine nucleoside triphosphate metabolic process	-10.446	-7.58855	17/188	100,226,230,523,525,2023,2597,2773,3099,3939,5223,5230,5315,6389,6390,7167,221264	ADA,ALDOA,ALDOC,ATP6V1A,ATP6V1B1,ENO1,GAPDH,GNAI3,HK2,LDHA,PGAM1,PGK1,PKM,SDHA,SDHB,TPI1,AK9
2_Member	GO Biological Processes	GO:0072521	purine-containing compound metabolic process	-10.3831	-7.5521	26/487	100,226,230,523,525,2023,2597,2773,3099,3295,3418,3939,5223,5230,5315,5631,5636,6389,6390,7167,9497,9524,9563,10135,25819,221264	ADA,ALDOA,ALDOC,ATP6V1A,ATP6V1B1,ENO1,GAPDH,GNAI3,HK2,HSD17B4,IDH2,LDHA,PGAM1,PGK1,PKM,PRPS1,PRPSAP2,SDHA,SDHB,TPI1,SLC4A7,TECR,H6PD,NAMPT,NOCT,AK9
2_Member	GO Biological Processes	GO:0006165	nucleoside diphosphate phosphorylation	-10.3041	-7.48607	11/60	226,230,2023,2597,3099,3939,5223,5230,5315,7167,221264	ALDOA,ALDOC,ENO1,GAPDH,HK2,LDHA,PGAM1,PGK1,PKM,TPI1,AK9
2_Member	GO Biological Processes	GO:0046939	nucleotide phosphorylation	-10.1414	-7.33595	11/62	226,230,2023,2597,3099,3939,5223,5230,5315,7167,221264	ALDOA,ALDOC,ENO1,GAPDH,HK2,LDHA,PGAM1,PGK1,PKM,TPI1,AK9
2_Member	GO Biological Processes	GO:0009135	purine nucleoside diphosphate metabolic process	-9.98458	-7.20331	11/64	226,230,2023,2597,3099,3939,5223,5230,5315,7167,221264	ALDOA,ALDOC,ENO1,GAPDH,HK2,LDHA,PGAM1,PGK1,PKM,TPI1,AK9
2_Member	GO Biological Processes	GO:0009179	purine ribonucleoside diphosphate metabolic process	-9.98458	-7.20331	11/64	226,230,2023,2597,3099,3939,5223,5230,5315,7167,221264	ALDOA,ALDOC,ENO1,GAPDH,HK2,LDHA,PGAM1,PGK1,PKM,TPI1,AK9
2_Member	GO Biological Processes	GO:0009117	nucleotide metabolic process	-9.85542	-7.108	26/515	100,226,230,523,525,2023,2597,2773,3099,3295,3418,3939,5223,5230,5315,5631,5636,6389,6390,7167,9497,9524,9563,10135,25819,221264	ADA,ALDOA,ALDOC,ATP6V1A,ATP6V1B1,ENO1,GAPDH,GNAI3,HK2,HSD17B4,IDH2,LDHA,PGAM1,PGK1,PKM,PRPS1,PRPSAP2,SDHA,SDHB,TPI1,SLC4A7,TECR,H6PD,NAMPT,NOCT,AK9
2_Member	KEGG Pathway	hsa00010	Glycolysis / Gluconeogenesis	-9.75969	-7.02713	11/67	226,230,501,2023,2597,3099,3939,5223,5230,5315,7167	ALDOA,ALDOC,ALDH7A1,ENO1,GAPDH,HK2,LDHA,PGAM1,PGK1,PKM,TPI1
2_Member	GO Biological Processes	GO:0009141	nucleoside triphosphate metabolic process	-9.75335	-7.02713	17/208	100,226,230,523,525,2023,2597,2773,3099,3939,5223,5230,5315,6389,6390,7167,221264	ADA,ALDOA,ALDOC,ATP6V1A,ATP6V1B1,ENO1,GAPDH,GNAI3,HK2,LDHA,PGAM1,PGK1,PKM,SDHA,SDHB,TPI1,AK9
2_Member	WikiPathways	WP4018	Clear cell renal cell carcinoma pathways	-9.73616	-7.02015	12/86	226,230,2023,2597,3099,3939,5230,5315,5352,6009,6513,7167	ALDOA,ALDOC,ENO1,GAPDH,HK2,LDHA,PGK1,PKM,PLOD2,RHEB,SLC2A1,TPI1
2_Member	GO Biological Processes	GO:0006753	nucleoside phosphate metabolic process	-9.71129	-7.00527	26/523	100,226,230,523,525,2023,2597,2773,3099,3295,3418,3939,5223,5230,5315,5631,5636,6389,6390,7167,9497,9524,9563,10135,25819,221264	ADA,ALDOA,ALDOC,ATP6V1A,ATP6V1B1,ENO1,GAPDH,GNAI3,HK2,HSD17B4,IDH2,LDHA,PGAM1,PGK1,PKM,PRPS1,PRPSAP2,SDHA,SDHB,TPI1,SLC4A7,TECR,H6PD,NAMPT,NOCT,AK9
2_Member	GO Biological Processes	GO:0009205	purine ribonucleoside triphosphate metabolic process	-9.64754	-6.95128	16/183	226,230,523,525,2023,2597,2773,3099,3939,5223,5230,5315,6389,6390,7167,221264	ALDOA,ALDOC,ATP6V1A,ATP6V1B1,ENO1,GAPDH,GNAI3,HK2,LDHA,PGAM1,PGK1,PKM,SDHA,SDHB,TPI1,AK9
2_Member	GO Biological Processes	GO:0046034	ATP metabolic process	-9.58409	-6.89738	15/158	226,230,523,525,2023,2597,3099,3939,5223,5230,5315,6389,6390,7167,221264	ALDOA,ALDOC,ATP6V1A,ATP6V1B1,ENO1,GAPDH,HK2,LDHA,PGAM1,PGK1,PKM,SDHA,SDHB,TPI1,AK9
2_Member	WikiPathways	WP1946	Cori cycle	-9.49897	-6.8216	7/17	226,2597,3939,5223,5230,6513,7167	ALDOA,GAPDH,LDHA,PGAM1,PGK1,SLC2A1,TPI1
2_Member	GO Biological Processes	GO:0009199	ribonucleoside triphosphate metabolic process	-9.40558	-6.7463	16/190	226,230,523,525,2023,2597,2773,3099,3939,5223,5230,5315,6389,6390,7167,221264	ALDOA,ALDOC,ATP6V1A,ATP6V1B1,ENO1,GAPDH,GNAI3,HK2,LDHA,PGAM1,PGK1,PKM,SDHA,SDHB,TPI1,AK9
2_Member	GO Biological Processes	GO:0009185	ribonucleoside diphosphate metabolic process	-9.27709	-6.63519	11/74	226,230,2023,2597,3099,3939,5223,5230,5315,7167,221264	ALDOA,ALDOC,ENO1,GAPDH,HK2,LDHA,PGAM1,PGK1,PKM,TPI1,AK9
2_Member	WikiPathways	WP5049	Glycolysis in senescence	-9.13459	-6.51751	6/11	230,2023,2597,3939,5230,5315	ALDOC,ENO1,GAPDH,LDHA,PGK1,PKM
2_Member	Reactome Gene Sets	R-HSA-70171	Glycolysis	-8.25083	-5.70744	10/71	226,230,2023,2597,3099,5210,5223,5230,5315,7167	ALDOA,ALDOC,ENO1,GAPDH,HK2,PFKFB4,PGAM1,PGK1,PKM,TPI1
2_Member	Reactome Gene Sets	R-HSA-71387	Metabolism of carbohydrates	-8.24875	-5.70744	18/295	226,230,801,2023,2548,2597,2632,3099,5210,5223,5230,5315,5631,6513,6652,7167,26007,375790	ALDOA,ALDOC,CALM1,ENO1,GAA,GAPDH,GBE1,HK2,PFKFB4,PGAM1,PGK1,PKM,PRPS1,SLC2A1,SORD,TPI1,TKFC,AGRN
2_Member	GO Biological Processes	GO:0009132	nucleoside diphosphate metabolic process	-8.24399	-5.70744	11/92	226,230,2023,2597,3099,3939,5223,5230,5315,7167,221264	ALDOA,ALDOC,ENO1,GAPDH,HK2,LDHA,PGAM1,PGK1,PKM,TPI1,AK9
2_Member	GO Biological Processes	GO:0019693	ribose phosphate metabolic process	-8.22706	-5.69713	21/407	100,226,230,523,525,2023,2597,2773,3099,3295,3939,5223,5230,5315,5631,5636,6389,6390,7167,9524,221264	ADA,ALDOA,ALDOC,ATP6V1A,ATP6V1B1,ENO1,GAPDH,GNAI3,HK2,HSD17B4,LDHA,PGAM1,PGK1,PKM,PRPS1,PRPSAP2,SDHA,SDHB,TPI1,TECR,AK9
2_Member	GO Biological Processes	GO:0009150	purine ribonucleotide metabolic process	-7.29976	-4.86761	19/379	100,226,230,523,525,2023,2597,2773,3099,3295,3939,5223,5230,5315,6389,6390,7167,9524,221264	ADA,ALDOA,ALDOC,ATP6V1A,ATP6V1B1,ENO1,GAPDH,GNAI3,HK2,HSD17B4,LDHA,PGAM1,PGK1,PKM,SDHA,SDHB,TPI1,TECR,AK9
2_Member	Reactome Gene Sets	R-HSA-70326	Glucose metabolism	-7.19131	-4.78136	10/91	226,230,2023,2597,3099,5210,5223,5230,5315,7167	ALDOA,ALDOC,ENO1,GAPDH,HK2,PFKFB4,PGAM1,PGK1,PKM,TPI1
2_Member	Reactome Gene Sets	R-HSA-70263	Gluconeogenesis	-7.12663	-4.74564	7/34	226,230,2023,2597,5223,5230,7167	ALDOA,ALDOC,ENO1,GAPDH,PGAM1,PGK1,TPI1
2_Member	GO Biological Processes	GO:0009259	ribonucleotide metabolic process	-6.968	-4.59625	19/398	100,226,230,523,525,2023,2597,2773,3099,3295,3939,5223,5230,5315,6389,6390,7167,9524,221264	ADA,ALDOA,ALDOC,ATP6V1A,ATP6V1B1,ENO1,GAPDH,GNAI3,HK2,HSD17B4,LDHA,PGAM1,PGK1,PKM,SDHA,SDHB,TPI1,TECR,AK9
2_Member	GO Biological Processes	GO:0019320	hexose catabolic process	-6.69082	-4.34567	7/39	2023,2530,3099,5230,5315,7167,26007	ENO1,FUT8,HK2,PGK1,PKM,TPI1,TKFC
2_Member	GO Biological Processes	GO:0046365	monosaccharide catabolic process	-6.38595	-4.08956	7/43	2023,2530,3099,5230,5315,7167,26007	ENO1,FUT8,HK2,PGK1,PKM,TPI1,TKFC
2_Member	GO Biological Processes	GO:0006735	NADH regeneration	-6.21551	-3.9664	5/16	2023,3099,5230,5315,7167	ENO1,HK2,PGK1,PKM,TPI1
2_Member	GO Biological Processes	GO:0061621	canonical glycolysis	-6.21551	-3.9664	5/16	2023,3099,5230,5315,7167	ENO1,HK2,PGK1,PKM,TPI1
2_Member	GO Biological Processes	GO:0061718	glucose catabolic process to pyruvate	-6.21551	-3.9664	5/16	2023,3099,5230,5315,7167	ENO1,HK2,PGK1,PKM,TPI1
2_Member	Canonical Pathways	M255	PID HIF1 TFPATHWAY	-6.19697	-3.95337	8/66	226,2023,3099,3939,5230,5315,6513,10397	ALDOA,ENO1,HK2,LDHA,PGK1,PKM,SLC2A1,NDRG1
2_Member	GO Biological Processes	GO:0006006	glucose metabolic process	-6.19273	-3.95337	10/116	230,2023,2548,2597,3099,5230,5315,6652,7167,9563	ALDOC,ENO1,GAA,GAPDH,HK2,PGK1,PKM,SORD,TPI1,H6PD
2_Member	WikiPathways	WP2456	HIF1A and PPARG regulation of glycolysis	-6.01751	-3.79515	4/8	2597,3939,6513,7167	GAPDH,LDHA,SLC2A1,TPI1
2_Member	GO Biological Processes	GO:0061615	glycolytic process through fructose-6-phosphate	-5.93074	-3.71799	5/18	2023,3099,5230,5315,7167	ENO1,HK2,PGK1,PKM,TPI1
2_Member	GO Biological Processes	GO:0061620	glycolytic process through glucose-6-phosphate	-5.93074	-3.71799	5/18	2023,3099,5230,5315,7167	ENO1,HK2,PGK1,PKM,TPI1
2_Member	KEGG Pathway	hsa04066	HIF-1 signaling pathway	-5.47426	-3.33431	9/109	226,230,2023,2597,3099,3939,5230,5604,6513	ALDOA,ALDOC,ENO1,GAPDH,HK2,LDHA,PGK1,MAP2K1,SLC2A1
2_Member	GO Biological Processes	GO:0006007	glucose catabolic process	-5.45876	-3.32677	5/22	2023,3099,5230,5315,7167	ENO1,HK2,PGK1,PKM,TPI1
2_Member	Canonical Pathways	M66	PID MYC ACTIV PATHWAY	-3.62729	-1.87378	6/79	581,2023,2597,3939,6513,10935	BAX,ENO1,GAPDH,LDHA,SLC2A1,PRDX3
3_Summary	KEGG Pathway	hsa04141	Protein processing in endoplasmic reticulum	-15.4509	-11.5786	21/171	581,824,1650,2923,3309,3337,3703,3998,5034,5589,6184,6185,7184,9601,10130,10134,10961,23193,23480,30001,201595,6902,7203,9526,10549,10954,64175,80273,81562,746,7009,55139,55161,79956	BAX,CAPN2,DDOST,PDIA3,HSPA5,DNAJB1,STT3A,LMAN1,P4HB,PRKCSH,RPN1,RPN2,HSP90B1,PDIA4,PDIA6,BCAP31,ERP29,GANAB,SEC61G,ERO1A,STT3B,TBCA,CCT3,MPDU1,PRDX4,PDIA5,P3H1,GRPEL1,LMAN2L,TMEM258,TMBIM6,ANKZF1,TMEM33,ERMP1
3_Member	KEGG Pathway	hsa04141	Protein processing in endoplasmic reticulum	-15.4509	-11.5786	21/171	581,824,1650,2923,3309,3337,3703,3998,5034,5589,6184,6185,7184,9601,10130,10134,10961,23193,23480,30001,201595	BAX,CAPN2,DDOST,PDIA3,HSPA5,DNAJB1,STT3A,LMAN1,P4HB,PRKCSH,RPN1,RPN2,HSP90B1,PDIA4,PDIA6,BCAP31,ERP29,GANAB,SEC61G,ERO1A,STT3B
3_Member	GO Biological Processes	GO:0006457	protein folding	-10.4329	-7.58855	18/216	2923,3309,3337,3998,5034,6902,7184,7203,9526,9601,10130,10549,10954,10961,30001,64175,80273,81562	PDIA3,HSPA5,DNAJB1,LMAN1,P4HB,TBCA,HSP90B1,CCT3,MPDU1,PDIA4,PDIA6,PRDX4,PDIA5,ERP29,ERO1A,P3H1,GRPEL1,LMAN2L
3_Member	GO Biological Processes	GO:0034976	response to endoplasmic reticulum stress	-7.58065	-5.12327	15/221	581,746,2923,3309,5034,7009,7184,9601,10130,10134,30001,55139,55161,79956,201595	BAX,TMEM258,PDIA3,HSPA5,P4HB,TMBIM6,HSP90B1,PDIA4,PDIA6,BCAP31,ERO1A,ANKZF1,TMEM33,ERMP1,STT3B
4_Summary	GO Biological Processes	GO:0032787	monocarboxylic acid metabolic process	-14.07	-10.4195	31/498	37,51,226,230,525,1376,1622,2023,2597,3099,3295,3418,3939,4282,5096,5223,5230,5315,5447,6307,6342,6566,6652,7167,9123,9524,10994,26090,51495,114876,153364,847,5052,5195,79153,79143	ACADVL,ACOX1,ALDOA,ALDOC,ATP6V1B1,CPT2,DBI,ENO1,GAPDH,HK2,HSD17B4,IDH2,LDHA,MIF,PCCB,PGAM1,PGK1,PKM,POR,MSMO1,SCP2,SLC16A1,SORD,TPI1,SLC16A3,TECR,ILVBL,ABHD12,HACD3,OSBPL1A,MBLAC2,CAT,PRDX1,PEX14,GDPD3,MBOAT7
4_Member	GO Biological Processes	GO:0032787	monocarboxylic acid metabolic process	-14.07	-10.4195	31/498	37,51,226,230,525,1376,1622,2023,2597,3099,3295,3418,3939,4282,5096,5223,5230,5315,5447,6307,6342,6566,6652,7167,9123,9524,10994,26090,51495,114876,153364	ACADVL,ACOX1,ALDOA,ALDOC,ATP6V1B1,CPT2,DBI,ENO1,GAPDH,HK2,HSD17B4,IDH2,LDHA,MIF,PCCB,PGAM1,PGK1,PKM,POR,MSMO1,SCP2,SLC16A1,SORD,TPI1,SLC16A3,TECR,ILVBL,ABHD12,HACD3,OSBPL1A,MBLAC2
4_Member	GO Biological Processes	GO:0072329	monocarboxylic acid catabolic process	-6.37114	-4.07857	10/111	37,51,1376,3295,5096,6342,6566,6652,9123,10994	ACADVL,ACOX1,CPT2,HSD17B4,PCCB,SCP2,SLC16A1,SORD,SLC16A3,ILVBL
4_Member	GO Biological Processes	GO:0006631	fatty acid metabolic process	-6.24121	-3.97453	16/319	37,51,525,1376,1622,3295,4282,5096,5447,6307,6342,9524,10994,26090,51495,153364	ACADVL,ACOX1,ATP6V1B1,CPT2,DBI,HSD17B4,MIF,PCCB,POR,MSMO1,SCP2,TECR,ILVBL,ABHD12,HACD3,MBLAC2
4_Member	KEGG Pathway	hsa01212	Fatty acid metabolism	-5.52898	-3.37536	7/57	37,51,1376,3295,6342,9524,51495	ACADVL,ACOX1,CPT2,HSD17B4,SCP2,TECR,HACD3
4_Member	WikiPathways	WP1941	Peroxisomal beta-oxidation of tetracosanoyl-CoA	-5.28516	-3.19814	3/4	51,3295,6342	ACOX1,HSD17B4,SCP2
4_Member	KEGG Pathway	hsa01040	Biosynthesis of unsaturated fatty acids	-4.99179	-2.95407	5/27	51,3295,6342,9524,51495	ACOX1,HSD17B4,SCP2,TECR,HACD3
4_Member	GO Biological Processes	GO:0019395	fatty acid oxidation	-4.4729	-2.54994	7/82	37,51,1376,3295,5447,6342,10994	ACADVL,ACOX1,CPT2,HSD17B4,POR,SCP2,ILVBL
4_Member	KEGG Pathway	hsa04146	Peroxisome	-4.4729	-2.54994	7/82	51,847,3295,3418,5052,5195,6342	ACOX1,CAT,HSD17B4,IDH2,PRDX1,PEX14,SCP2
4_Member	Reactome Gene Sets	R-HSA-9033500	TYSND1 cleaves peroxisomal proteins	-4.3538	-2.45612	3/7	51,3295,6342	ACOX1,HSD17B4,SCP2
4_Member	GO Biological Processes	GO:0009062	fatty acid catabolic process	-4.33888	-2.44729	7/86	37,51,1376,3295,5096,6342,10994	ACADVL,ACOX1,CPT2,HSD17B4,PCCB,SCP2,ILVBL
4_Member	GO Biological Processes	GO:0034440	lipid oxidation	-4.27457	-2.39931	7/88	37,51,1376,3295,5447,6342,10994	ACADVL,ACOX1,CPT2,HSD17B4,POR,SCP2,ILVBL
4_Member	Reactome Gene Sets	R-HSA-8978868	Fatty acid metabolism	-3.80379	-2.01898	9/177	37,51,1376,1622,3295,5096,6342,9524,51495	ACADVL,ACOX1,CPT2,DBI,HSD17B4,PCCB,SCP2,TECR,HACD3
4_Member	GO Biological Processes	GO:0044242	cellular lipid catabolic process	-3.59117	-1.84593	9/189	37,51,1376,3295,5096,6342,10994,26090,79153	ACADVL,ACOX1,CPT2,HSD17B4,PCCB,SCP2,ILVBL,ABHD12,GDPD3
4_Member	Reactome Gene Sets	R-HSA-2046104	alpha-linolenic (omega3) and linoleic (omega6) acid metabolism	-3.46276	-1.74831	3/13	51,3295,6342	ACOX1,HSD17B4,SCP2
4_Member	Reactome Gene Sets	R-HSA-2046106	alpha-linolenic acid (ALA) metabolism	-3.46276	-1.74831	3/13	51,3295,6342	ACOX1,HSD17B4,SCP2
4_Member	GO Biological Processes	GO:0006635	fatty acid beta-oxidation	-3.28992	-1.61439	5/60	37,51,1376,3295,6342	ACADVL,ACOX1,CPT2,HSD17B4,SCP2
4_Member	GO Biological Processes	GO:0030258	lipid modification	-3.28581	-1.61119	8/166	37,51,1376,3295,5447,6342,10994,79143	ACADVL,ACOX1,CPT2,HSD17B4,POR,SCP2,ILVBL,MBOAT7
4_Member	GO Biological Processes	GO:0000038	very long-chain fatty acid metabolic process	-3.2451	-1.57778	4/35	51,3295,9524,51495	ACOX1,HSD17B4,TECR,HACD3
4_Member	Reactome Gene Sets	R-HSA-9033241	Peroxisomal protein import	-3.19197	-1.53798	5/63	51,847,3295,5195,6342	ACOX1,CAT,HSD17B4,PEX14,SCP2
4_Member	WikiPathways	WP2878	PPAR-alpha pathway	-2.54997	-1.05662	3/26	1376,1622,6342	CPT2,DBI,SCP2
4_Member	Reactome Gene Sets	R-HSA-390918	Peroxisomal lipid metabolism	-2.4127	-0.955322	3/29	51,3295,6342	ACOX1,HSD17B4,SCP2
4_Member	GO Biological Processes	GO:0016042	lipid catabolic process	-2.35139	-0.907711	9/285	37,51,1376,3295,5096,6342,10994,26090,79153	ACADVL,ACOX1,CPT2,HSD17B4,PCCB,SCP2,ILVBL,ABHD12,GDPD3
4_Member	Reactome Gene Sets	R-HSA-192105	Synthesis of bile acids and bile salts	-2.21598	-0.815602	3/34	3295,6342,114876	HSD17B4,SCP2,OSBPL1A
4_Member	WikiPathways	WP3942	PPAR signaling pathway	-2.17596	-0.779765	4/68	51,1376,1622,6342	ACOX1,CPT2,DBI,SCP2
4_Member	KEGG Pathway	hsa03320	PPAR signaling pathway	-2.02788	-0.666964	4/75	51,1376,1622,6342	ACOX1,CPT2,DBI,SCP2
5_Summary	WikiPathways	WP4290	Metabolic reprogramming in colon cancer	-13.6898	-10.1184	12/42	2023,2597,2746,3418,3939,5223,5230,5315,6390,6513,9123,29920,587,3099,6566,8140,5604,581,6515,801,2776	ENO1,GAPDH,GLUD1,IDH2,LDHA,PGAM1,PGK1,PKM,SDHB,SLC2A1,SLC16A3,PYCR2,BCAT2,HK2,SLC16A1,SLC7A5,MAP2K1,BAX,SLC2A3,CALM1,GNAQ
5_Member	WikiPathways	WP4290	Metabolic reprogramming in colon cancer	-13.6898	-10.1184	12/42	2023,2597,2746,3418,3939,5223,5230,5315,6390,6513,9123,29920	ENO1,GAPDH,GLUD1,IDH2,LDHA,PGAM1,PGK1,PKM,SDHB,SLC2A1,SLC16A3,PYCR2
5_Member	WikiPathways	WP5220	Metabolic reprogramming in pancreatic cancer	-7.78494	-5.31628	8/42	587,2746,3099,3939,5315,6513,6566,8140	BCAT2,GLUD1,HK2,LDHA,PKM,SLC2A1,SLC16A1,SLC7A5
5_Member	KEGG Pathway	hsa05230	Central carbon metabolism in cancer	-7.1284	-4.74564	9/70	3099,3418,3939,5223,5315,5604,6513,8140,9123	HK2,IDH2,LDHA,PGAM1,PKM,MAP2K1,SLC2A1,SLC7A5,SLC16A3
5_Member	WikiPathways	WP3614	Photodynamic therapy-induced HIF-1 survival signaling	-6.77266	-4.41882	7/38	581,3939,5230,5315,6513,6515,6566	BAX,LDHA,PGK1,PKM,SLC2A1,SLC2A3,SLC16A1
5_Member	WikiPathways	WP5211	Glucose metabolism in triple-negative breast cancer cells	-6.01751	-3.79515	4/8	3939,5315,6513,6566	LDHA,PKM,SLC2A1,SLC16A1
5_Member	KEGG Pathway	hsa04922	Glucagon signaling pathway	-2.92526	-1.33242	6/107	801,2776,3939,5223,5315,6513	CALM1,GNAQ,LDHA,PGAM1,PKM,SLC2A1
6_Summary	Reactome Gene Sets	R-HSA-109582	Hemostasis	-13.0072	-9.612	33/621	226,302,334,351,462,682,801,928,961,2147,2316,2773,2776,2885,3043,3309,3678,4282,5660,5747,5868,6520,6566,6717,6810,7873,8140,9123,10447,10916,26090,50848,78991	ALDOA,ANXA2,APLP2,APP,SERPINC1,BSG,CALM1,CD9,CD47,F2,FLNA,GNAI3,GNAQ,GRB2,HBB,HSPA5,ITGA5,MIF,PSAP,PTK2,RAB5A,SLC3A2,SLC16A1,SRI,STX4,MANF,SLC7A5,SLC16A3,FAM3C,MAGED2,ABHD12,F11R,PCYOX1L
6_Member	Reactome Gene Sets	R-HSA-109582	Hemostasis	-13.0072	-9.612	33/621	226,302,334,351,462,682,801,928,961,2147,2316,2773,2776,2885,3043,3309,3678,4282,5660,5747,5868,6520,6566,6717,6810,7873,8140,9123,10447,10916,26090,50848,78991	ALDOA,ANXA2,APLP2,APP,SERPINC1,BSG,CALM1,CD9,CD47,F2,FLNA,GNAI3,GNAQ,GRB2,HBB,HSPA5,ITGA5,MIF,PSAP,PTK2,RAB5A,SLC3A2,SLC16A1,SRI,STX4,MANF,SLC7A5,SLC16A3,FAM3C,MAGED2,ABHD12,F11R,PCYOX1L
6_Member	Reactome Gene Sets	R-HSA-76002	Platelet activation, signaling and aggregation	-9.9069	-7.14849	19/263	226,334,351,801,928,2147,2316,2773,2776,2885,3309,5660,5747,6810,7873,10447,10916,26090,78991	ALDOA,APLP2,APP,CALM1,CD9,F2,FLNA,GNAI3,GNAQ,GRB2,HSPA5,PSAP,PTK2,STX4,MANF,FAM3C,MAGED2,ABHD12,PCYOX1L
6_Member	Reactome Gene Sets	R-HSA-76005	Response to elevated platelet cytosolic Ca2+	-8.50063	-5.92931	13/134	226,334,351,801,928,2316,3309,5660,6810,7873,10447,10916,78991	ALDOA,APLP2,APP,CALM1,CD9,FLNA,HSPA5,PSAP,STX4,MANF,FAM3C,MAGED2,PCYOX1L
6_Member	Reactome Gene Sets	R-HSA-114608	Platelet degranulation	-7.68554	-5.22256	12/129	226,334,351,801,928,2316,3309,5660,7873,10447,10916,78991	ALDOA,APLP2,APP,CALM1,CD9,FLNA,HSPA5,PSAP,MANF,FAM3C,MAGED2,PCYOX1L
7_Summary	GO Biological Processes	GO:0018126	protein hydroxylation	-12.8037	-9.45427	10/27	444,5033,5034,5351,5352,8974,8985,10549,30001,64175,1282,79709,1508,462,1476,1992,2147,301,302,309,3998,6282,6286,10272,57402,140576	ASPH,P4HA1,P4HB,PLOD1,PLOD2,P4HA2,PLOD3,PRDX4,ERO1A,P3H1,COL4A1,COLGALT1,CTSB,SERPINC1,CSTB,SERPINB1,F2,ANXA1,ANXA2,ANXA6,LMAN1,S100A11,S100P,FSTL3,S100A14,S100A16
7_Member	GO Biological Processes	GO:0018126	protein hydroxylation	-12.8037	-9.45427	10/27	444,5033,5034,5351,5352,8974,8985,10549,30001,64175	ASPH,P4HA1,P4HB,PLOD1,PLOD2,P4HA2,PLOD3,PRDX4,ERO1A,P3H1
7_Member	GO Biological Processes	GO:0019511	peptidyl-proline hydroxylation	-8.11592	-5.59252	6/15	5033,5034,8974,10549,30001,64175	P4HA1,P4HB,P4HA2,PRDX4,ERO1A,P3H1
7_Member	GO Biological Processes	GO:0018401	peptidyl-proline hydroxylation to 4-hydroxy-L-proline	-7.43086	-4.97902	5/10	5033,5034,8974,10549,30001	P4HA1,P4HB,P4HA2,PRDX4,ERO1A
7_Member	Reactome Gene Sets	R-HSA-1650814	Collagen biosynthesis and modifying enzymes	-7.298	-4.86761	9/67	1282,5033,5034,5351,5352,8974,8985,64175,79709	COL4A1,P4HA1,P4HB,PLOD1,PLOD2,P4HA2,PLOD3,P3H1,COLGALT1
7_Member	Reactome Gene Sets	R-HSA-1474290	Collagen formation	-7.23766	-4.81761	10/90	1282,1508,5033,5034,5351,5352,8974,8985,64175,79709	COL4A1,CTSB,P4HA1,P4HB,PLOD1,PLOD2,P4HA2,PLOD3,P3H1,COLGALT1
7_Member	WikiPathways	WP4786	Type I collagen synthesis in the context of osteogenesis imperfecta	-7.22266	-4.80769	7/33	5033,5034,5351,5352,8974,64175,79709	P4HA1,P4HB,PLOD1,PLOD2,P4HA2,P3H1,COLGALT1
7_Member	GO Biological Processes	GO:0018208	peptidyl-proline modification	-4.91277	-2.88551	6/47	5033,5034,8974,10549,30001,64175	P4HA1,P4HB,P4HA2,PRDX4,ERO1A,P3H1
7_Member	Canonical Pathways	M3468	NABA ECM REGULATORS	-4.15007	-2.29614	11/238	462,1476,1508,1992,2147,5033,5351,5352,8974,8985,64175	SERPINC1,CSTB,CTSB,SERPINB1,F2,P4HA1,PLOD1,PLOD2,P4HA2,PLOD3,P3H1
7_Member	Canonical Pathways	M5885	NABA MATRISOME ASSOCIATED	-3.57007	-1.83125	20/751	301,302,309,462,1476,1508,1992,2147,3998,5033,5351,5352,6282,6286,8974,8985,10272,57402,64175,140576	ANXA1,ANXA2,ANXA6,SERPINC1,CSTB,CTSB,SERPINB1,F2,LMAN1,P4HA1,PLOD1,PLOD2,S100A11,S100P,P4HA2,PLOD3,FSTL3,S100A14,P3H1,S100A16
8_Summary	GO Biological Processes	GO:0044282	small molecule catabolic process	-12.4275	-9.11941	25/362	37,51,100,587,1376,1629,2023,2530,2746,3099,3295,4329,4942,5096,5230,5315,6342,6566,6652,7167,9123,10994,11112,26007,51380,501,3939,6230,6520,6611,8140,29920	ACADVL,ACOX1,ADA,BCAT2,CPT2,DBT,ENO1,FUT8,GLUD1,HK2,HSD17B4,ALDH6A1,OAT,PCCB,PGK1,PKM,SCP2,SLC16A1,SORD,TPI1,SLC16A3,ILVBL,HIBADH,TKFC,CSAD,ALDH7A1,LDHA,RPS25,SLC3A2,SMS,SLC7A5,PYCR2
8_Member	GO Biological Processes	GO:0044282	small molecule catabolic process	-12.4275	-9.11941	25/362	37,51,100,587,1376,1629,2023,2530,2746,3099,3295,4329,4942,5096,5230,5315,6342,6566,6652,7167,9123,10994,11112,26007,51380	ACADVL,ACOX1,ADA,BCAT2,CPT2,DBT,ENO1,FUT8,GLUD1,HK2,HSD17B4,ALDH6A1,OAT,PCCB,PGK1,PKM,SCP2,SLC16A1,SORD,TPI1,SLC16A3,ILVBL,HIBADH,TKFC,CSAD
8_Member	GO Biological Processes	GO:0046395	carboxylic acid catabolic process	-9.25344	-6.61997	17/224	37,51,587,1376,1629,2746,3295,4329,4942,5096,6342,6566,6652,9123,10994,11112,51380	ACADVL,ACOX1,BCAT2,CPT2,DBT,GLUD1,HSD17B4,ALDH6A1,OAT,PCCB,SCP2,SLC16A1,SORD,SLC16A3,ILVBL,HIBADH,CSAD
8_Member	GO Biological Processes	GO:0016054	organic acid catabolic process	-9.13505	-6.51751	17/228	37,51,587,1376,1629,2746,3295,4329,4942,5096,6342,6566,6652,9123,10994,11112,51380	ACADVL,ACOX1,BCAT2,CPT2,DBT,GLUD1,HSD17B4,ALDH6A1,OAT,PCCB,SCP2,SLC16A1,SORD,SLC16A3,ILVBL,HIBADH,CSAD
8_Member	GO Biological Processes	GO:0009081	branched-chain amino acid metabolic process	-6.39223	-4.09198	6/27	587,1629,4329,5096,10994,11112	BCAT2,DBT,ALDH6A1,PCCB,ILVBL,HIBADH
8_Member	GO Biological Processes	GO:0006573	valine metabolic process	-6.31477	-4.03718	4/7	587,4329,10994,11112	BCAT2,ALDH6A1,ILVBL,HIBADH
8_Member	WikiPathways	WP4686	Leucine, isoleucine and valine metabolism	-5.25867	-3.17402	5/24	587,1629,4329,5096,11112	BCAT2,DBT,ALDH6A1,PCCB,HIBADH
8_Member	KEGG Pathway	hsa00280	Valine, leucine and isoleucine degradation	-4.85877	-2.85172	6/48	501,587,1629,4329,5096,11112	ALDH7A1,BCAT2,DBT,ALDH6A1,PCCB,HIBADH
8_Member	KEGG Pathway	hsa00640	Propanoate metabolism	-4.61434	-2.66971	5/32	51,1629,3939,4329,5096	ACOX1,DBT,LDHA,ALDH6A1,PCCB
8_Member	GO Biological Processes	GO:0009083	branched-chain amino acid catabolic process	-4.13453	-2.28475	4/21	587,1629,4329,11112	BCAT2,DBT,ALDH6A1,HIBADH
8_Member	Reactome Gene Sets	R-HSA-70895	Branched-chain amino acid catabolism	-4.13453	-2.28475	4/21	587,1629,4329,11112	BCAT2,DBT,ALDH6A1,HIBADH
8_Member	GO Biological Processes	GO:0009063	amino acid catabolic process	-3.68809	-1.92408	7/109	587,1629,2746,4329,4942,11112,51380	BCAT2,DBT,GLUD1,ALDH6A1,OAT,HIBADH,CSAD
8_Member	Reactome Gene Sets	R-HSA-71291	Metabolism of amino acids and derivatives	-3.53193	-1.80467	13/376	501,587,1629,2746,4329,4942,6230,6520,6611,8140,11112,29920,51380	ALDH7A1,BCAT2,DBT,GLUD1,ALDH6A1,OAT,RPS25,SLC3A2,SMS,SLC7A5,HIBADH,PYCR2,CSAD
8_Member	KEGG Pathway	hsa00410	beta-Alanine metabolism	-3.4513	-1.73832	4/31	51,501,4329,51380	ACOX1,ALDH7A1,ALDH6A1,CSAD
8_Member	GO Biological Processes	GO:1901606	alpha-amino acid catabolic process	-3.29508	-1.61771	6/91	587,2746,4329,4942,11112,51380	BCAT2,GLUD1,ALDH6A1,OAT,HIBADH,CSAD
9_Summary	Reactome Gene Sets	R-HSA-1474244	Extracellular matrix organization	-11.5125	-8.36714	22/300	351,682,824,961,999,1282,1508,1605,2192,3678,3911,5033,5034,5351,5352,7448,8974,8985,50848,64175,79709,375790,100,2885,5604,5747,6692,10935,6513,10916	APP,BSG,CAPN2,CD47,CDH1,COL4A1,CTSB,DAG1,FBLN1,ITGA5,LAMA5,P4HA1,P4HB,PLOD1,PLOD2,VTN,P4HA2,PLOD3,F11R,P3H1,COLGALT1,AGRN,ADA,GRB2,MAP2K1,PTK2,SPINT1,PRDX3,SLC2A1,MAGED2
9_Member	Reactome Gene Sets	R-HSA-1474244	Extracellular matrix organization	-11.5125	-8.36714	22/300	351,682,824,961,999,1282,1508,1605,2192,3678,3911,5033,5034,5351,5352,7448,8974,8985,50848,64175,79709,375790	APP,BSG,CAPN2,CD47,CDH1,COL4A1,CTSB,DAG1,FBLN1,ITGA5,LAMA5,P4HA1,P4HB,PLOD1,PLOD2,VTN,P4HA2,PLOD3,F11R,P3H1,COLGALT1,AGRN
9_Member	GO Biological Processes	GO:0001890	placenta development	-3.56109	-1.82651	8/151	100,682,1508,2885,5604,5747,6692,10935	ADA,BSG,CTSB,GRB2,MAP2K1,PTK2,SPINT1,PRDX3
9_Member	GO Biological Processes	GO:0007565	female pregnancy	-3.18429	-1.53363	8/172	682,824,1508,2192,3678,6513,10916,10935	BSG,CAPN2,CTSB,FBLN1,ITGA5,SLC2A1,MAGED2,PRDX3
9_Member	GO Biological Processes	GO:0044703	multi-organism reproductive process	-2.87599	-1.29414	8/192	682,824,1508,2192,3678,6513,10916,10935	BSG,CAPN2,CTSB,FBLN1,ITGA5,SLC2A1,MAGED2,PRDX3
9_Member	GO Biological Processes	GO:0044706	multi-multicellular organism process	-2.7505	-1.20924	8/201	682,824,1508,2192,3678,6513,10916,10935	BSG,CAPN2,CTSB,FBLN1,ITGA5,SLC2A1,MAGED2,PRDX3
9_Member	Reactome Gene Sets	R-HSA-1474228	Degradation of the extracellular matrix	-2.33998	-0.90121	6/140	682,824,999,1282,1508,3911	BSG,CAPN2,CDH1,COL4A1,CTSB,LAMA5
9_Member	GO Biological Processes	GO:0001893	maternal placenta development	-2.18056	-0.783879	3/35	682,1508,10935	BSG,CTSB,PRDX3
10_Summary	Reactome Gene Sets	R-HSA-446203	Asparagine N-linked glycosylation	-11.3985	-8.2841	22/304	378,1650,1778,2530,2923,3703,3998,4351,5589,6184,6185,9526,9761,10195,10972,23193,23423,54187,54732,81562,91869,140735,100,226,523,746,5631,5636,6389,6390,6652,7167,7358,8985,9524,10724,22906,23275,58505,201595,221264,55129,196527,2810,6230,7334,26007,375790,476,2885,1974,2632,55830,79731,23480	ARF4,DDOST,DYNC1H1,FUT8,PDIA3,STT3A,LMAN1,MPI,PRKCSH,RPN1,RPN2,MPDU1,MLEC,ALG3,TMED10,GANAB,TMED3,NANS,TMED9,LMAN2L,RFT1,DYNLL2,ADA,ALDOA,ATP6V1A,TMEM258,PRPS1,PRPSAP2,SDHA,SDHB,SORD,TPI1,UGDH,PLOD3,TECR,OGA,TRAK1,POFUT2,OSTC,STT3B,AK9,ANO10,ANO6,SFN,RPS25,UBE2N,TKFC,AGRN,ATP1A1,GRB2,EIF4A2,GBE1,GLT8D1,NARS2,SEC61G
10_Member	Reactome Gene Sets	R-HSA-446203	Asparagine N-linked glycosylation	-11.3985	-8.2841	22/304	378,1650,1778,2530,2923,3703,3998,4351,5589,6184,6185,9526,9761,10195,10972,23193,23423,54187,54732,81562,91869,140735	ARF4,DDOST,DYNC1H1,FUT8,PDIA3,STT3A,LMAN1,MPI,PRKCSH,RPN1,RPN2,MPDU1,MLEC,ALG3,TMED10,GANAB,TMED3,NANS,TMED9,LMAN2L,RFT1,DYNLL2
10_Member	GO Biological Processes	GO:1901137	carbohydrate derivative biosynthetic process	-11.3783	-8.2841	30/590	100,226,523,746,1650,2530,3703,4351,5631,5636,6184,6185,6389,6390,6652,7167,7358,8985,9524,9526,9761,10195,10724,22906,23275,54187,58505,91869,201595,221264	ADA,ALDOA,ATP6V1A,TMEM258,DDOST,FUT8,STT3A,MPI,PRPS1,PRPSAP2,RPN1,RPN2,SDHA,SDHB,SORD,TPI1,UGDH,PLOD3,TECR,MPDU1,MLEC,ALG3,OGA,TRAK1,POFUT2,NANS,OSTC,RFT1,STT3B,AK9
10_Member	GO Biological Processes	GO:0006487	protein N-linked glycosylation	-10.6746	-7.74008	12/72	746,1650,2530,3703,6184,6185,9526,9761,10195,58505,91869,201595	TMEM258,DDOST,FUT8,STT3A,RPN1,RPN2,MPDU1,MLEC,ALG3,OSTC,RFT1,STT3B
10_Member	GO Biological Processes	GO:0070085	glycosylation	-8.84959	-6.24048	17/238	746,1650,2530,3703,6184,6185,8985,9526,9761,10195,10724,22906,23275,54187,58505,91869,201595	TMEM258,DDOST,FUT8,STT3A,RPN1,RPN2,PLOD3,MPDU1,MLEC,ALG3,OGA,TRAK1,POFUT2,NANS,OSTC,RFT1,STT3B
10_Member	GO Biological Processes	GO:0006486	protein glycosylation	-8.50448	-5.92931	16/219	746,1650,2530,3703,6184,6185,8985,9526,9761,10195,10724,22906,23275,58505,91869,201595	TMEM258,DDOST,FUT8,STT3A,RPN1,RPN2,PLOD3,MPDU1,MLEC,ALG3,OGA,TRAK1,POFUT2,OSTC,RFT1,STT3B
10_Member	GO Biological Processes	GO:0043413	macromolecule glycosylation	-8.50448	-5.92931	16/219	746,1650,2530,3703,6184,6185,8985,9526,9761,10195,10724,22906,23275,58505,91869,201595	TMEM258,DDOST,FUT8,STT3A,RPN1,RPN2,PLOD3,MPDU1,MLEC,ALG3,OGA,TRAK1,POFUT2,OSTC,RFT1,STT3B
10_Member	GO Biological Processes	GO:0018279	protein N-linked glycosylation via asparagine	-8.27729	-5.72021	7/24	1650,2530,3703,6184,6185,58505,201595	DDOST,FUT8,STT3A,RPN1,RPN2,OSTC,STT3B
10_Member	GO Biological Processes	GO:0009100	glycoprotein metabolic process	-7.90903	-5.41082	19/347	746,1650,2530,3703,5589,6184,6185,7358,8985,9526,9761,10195,10724,22906,23193,23275,58505,91869,201595	TMEM258,DDOST,FUT8,STT3A,PRKCSH,RPN1,RPN2,UGDH,PLOD3,MPDU1,MLEC,ALG3,OGA,TRAK1,GANAB,POFUT2,OSTC,RFT1,STT3B
10_Member	GO Biological Processes	GO:0009101	glycoprotein biosynthetic process	-7.88313	-5.39965	17/276	746,1650,2530,3703,6184,6185,7358,8985,9526,9761,10195,10724,22906,23275,58505,91869,201595	TMEM258,DDOST,FUT8,STT3A,RPN1,RPN2,UGDH,PLOD3,MPDU1,MLEC,ALG3,OGA,TRAK1,POFUT2,OSTC,RFT1,STT3B
10_Member	KEGG Pathway	hsa00510	N-Glycan biosynthesis	-7.16016	-4.76199	8/50	1650,2530,3703,6184,6185,10195,23193,201595	DDOST,FUT8,STT3A,RPN1,RPN2,ALG3,GANAB,STT3B
10_Member	Reactome Gene Sets	R-HSA-9772573	Late SARS-CoV-2 Infection Events	-7.1284	-4.74564	9/70	1650,2530,3703,5589,6184,6185,23193,55129,196527	DDOST,FUT8,STT3A,PRKCSH,RPN1,RPN2,GANAB,ANO10,ANO6
10_Member	Reactome Gene Sets	R-HSA-9694548	Maturation of spike protein	-6.85699	-4.48979	7/37	1650,2530,3703,5589,6184,6185,23193	DDOST,FUT8,STT3A,PRKCSH,RPN1,RPN2,GANAB
10_Member	KEGG Pathway	hsa00513	Various types of N-glycan biosynthesis	-6.69082	-4.34567	7/39	1650,2530,3703,6184,6185,10195,201595	DDOST,FUT8,STT3A,RPN1,RPN2,ALG3,STT3B
10_Member	CORUM	CORUM:1199	Oligosaccharyltransferase complex (Stt3A variant)	-6.67896	-4.33809	4/6	1650,3703,6184,6185	DDOST,STT3A,RPN1,RPN2
10_Member	CORUM	CORUM:1200	Oligosaccharyltransferase complex (Stt3B variant)	-6.31477	-4.03718	4/7	1650,6184,6185,201595	DDOST,RPN1,RPN2,STT3B
10_Member	CORUM	CORUM:6131	SELK multiprotein complex	-5.54794	-3.38599	4/10	1650,3703,6184,6185	DDOST,STT3A,RPN1,RPN2
10_Member	Reactome Gene Sets	R-HSA-9694635	Translation of Structural Proteins	-5.52898	-3.37536	7/57	1650,2530,3703,5589,6184,6185,23193	DDOST,FUT8,STT3A,PRKCSH,RPN1,RPN2,GANAB
10_Member	Reactome Gene Sets	R-HSA-9694516	SARS-CoV-2 Infection	-5.19045	-3.11973	14/299	1650,2530,2810,3703,5589,6184,6185,6230,7334,23193,26007,55129,196527,375790	DDOST,FUT8,SFN,STT3A,PRKCSH,RPN1,RPN2,RPS25,UBE2N,GANAB,TKFC,ANO10,ANO6,AGRN
10_Member	Reactome Gene Sets	R-HSA-9679506	SARS-CoV Infections	-4.79715	-2.80561	16/414	476,1650,2530,2810,2885,3703,5589,6184,6185,6230,7334,23193,26007,55129,196527,375790	ATP1A1,DDOST,FUT8,SFN,GRB2,STT3A,PRKCSH,RPN1,RPN2,RPS25,UBE2N,GANAB,TKFC,ANO10,ANO6,AGRN
10_Member	GO Biological Processes	GO:0034645	cellular macromolecule biosynthetic process	-4.31308	-2.42645	22/770	746,1650,1974,2530,2632,3703,6184,6185,6230,7358,8985,9526,9761,10195,10724,22906,23275,55830,58505,79731,91869,201595	TMEM258,DDOST,EIF4A2,FUT8,GBE1,STT3A,RPN1,RPN2,RPS25,UGDH,PLOD3,MPDU1,MLEC,ALG3,OGA,TRAK1,POFUT2,GLT8D1,OSTC,NARS2,RFT1,STT3B
10_Member	Reactome Gene Sets	R-HSA-1799339	SRP-dependent cotranslational protein targeting to membrane	-2.08384	-0.709804	5/113	1650,6184,6185,6230,23480	DDOST,RPN1,RPN2,RPS25,SEC61G
11_Summary	Reactome Gene Sets	R-HSA-5653656	Vesicle-mediated transport	-11.3408	-8.27009	32/673	351,378,801,1282,1778,2495,2664,2810,2885,3039,3040,3043,3998,4035,5868,5869,5870,5898,6810,7163,7164,7184,9341,9525,10640,10972,22931,23423,51552,54732,81562,140735,5034,9218,10016,10134,11018,222068,10066,2530	APP,ARF4,CALM1,COL4A1,DYNC1H1,FTH1,GDI1,SFN,GRB2,HBA1,HBA2,HBB,LMAN1,LRP1,RAB5A,RAB5B,RAB6A,RALA,STX4,TPD52,TPD52L1,HSP90B1,VAMP3,VPS4B,EXOC5,TMED10,RAB18,TMED3,RAB14,TMED9,LMAN2L,DYNLL2,P4HB,VAPA,PDCD6,BCAP31,TMED1,TMED4,SCAMP2,FUT8
11_Member	Reactome Gene Sets	R-HSA-5653656	Vesicle-mediated transport	-11.3408	-8.27009	32/673	351,378,801,1282,1778,2495,2664,2810,2885,3039,3040,3043,3998,4035,5868,5869,5870,5898,6810,7163,7164,7184,9341,9525,10640,10972,22931,23423,51552,54732,81562,140735	APP,ARF4,CALM1,COL4A1,DYNC1H1,FTH1,GDI1,SFN,GRB2,HBA1,HBA2,HBB,LMAN1,LRP1,RAB5A,RAB5B,RAB6A,RALA,STX4,TPD52,TPD52L1,HSP90B1,VAMP3,VPS4B,EXOC5,TMED10,RAB18,TMED3,RAB14,TMED9,LMAN2L,DYNLL2
11_Member	Reactome Gene Sets	R-HSA-199991	Membrane Trafficking	-7.9651	-5.46073	26/634	351,378,801,1778,2495,2664,2810,2885,3998,5868,5869,5870,5898,6810,7163,7164,9341,9525,10640,10972,22931,23423,51552,54732,81562,140735	APP,ARF4,CALM1,DYNC1H1,FTH1,GDI1,SFN,GRB2,LMAN1,RAB5A,RAB5B,RAB6A,RALA,STX4,TPD52,TPD52L1,VAMP3,VPS4B,EXOC5,TMED10,RAB18,TMED3,RAB14,TMED9,LMAN2L,DYNLL2
11_Member	GO Biological Processes	GO:0006888	endoplasmic reticulum to Golgi vesicle-mediated transport	-7.87989	-5.39965	12/124	378,3998,5034,9218,10016,10134,10972,11018,23423,54732,81562,222068	ARF4,LMAN1,P4HB,VAPA,PDCD6,BCAP31,TMED10,TMED1,TMED3,TMED9,LMAN2L,TMED4
11_Member	GO Biological Processes	GO:0048193	Golgi vesicle transport	-7.79086	-5.31645	17/280	378,3998,5034,5870,9218,9341,10016,10066,10134,10640,10972,11018,23423,51552,54732,81562,222068	ARF4,LMAN1,P4HB,RAB6A,VAPA,VAMP3,PDCD6,SCAMP2,BCAP31,EXOC5,TMED10,TMED1,TMED3,RAB14,TMED9,LMAN2L,TMED4
11_Member	Reactome Gene Sets	R-HSA-8856688	Golgi-to-ER retrograde transport	-3.9397	-2.12553	8/133	378,1778,5870,10972,22931,23423,54732,140735	ARF4,DYNC1H1,RAB6A,TMED10,RAB18,TMED3,TMED9,DYNLL2
11_Member	Reactome Gene Sets	R-HSA-948021	Transport to the Golgi and subsequent modification	-3.66011	-1.9017	9/185	378,1778,2530,3998,10972,23423,54732,81562,140735	ARF4,DYNC1H1,FUT8,LMAN1,TMED10,TMED3,TMED9,LMAN2L,DYNLL2
11_Member	Reactome Gene Sets	R-HSA-199977	ER to Golgi Anterograde Transport	-3.50338	-1.78128	8/154	378,1778,3998,10972,23423,54732,81562,140735	ARF4,DYNC1H1,LMAN1,TMED10,TMED3,TMED9,LMAN2L,DYNLL2
11_Member	Reactome Gene Sets	R-HSA-6811442	Intra-Golgi and retrograde Golgi-to-ER traffic	-3.37932	-1.68402	9/202	378,1778,5870,9341,10972,22931,23423,54732,140735	ARF4,DYNC1H1,RAB6A,VAMP3,TMED10,RAB18,TMED3,TMED9,DYNLL2
11_Member	Reactome Gene Sets	R-HSA-6807878	COPI-mediated anterograde transport	-3.05565	-1.43453	6/101	378,1778,10972,23423,54732,140735	ARF4,DYNC1H1,TMED10,TMED3,TMED9,DYNLL2
11_Member	GO Biological Processes	GO:0007030	Golgi organization	-2.2955	-0.869419	6/143	3998,10972,11018,23423,54732,222068	LMAN1,TMED10,TMED1,TMED3,TMED9,TMED4
11_Member	Reactome Gene Sets	R-HSA-5694530	Cargo concentration in the ER	-2.2526	-0.84215	3/33	3998,10972,81562	LMAN1,TMED10,LMAN2L
12_Summary	GO Biological Processes	GO:0044283	small molecule biosynthetic process	-11.2939	-8.24541	26/443	100,230,587,1717,1727,2746,4282,4942,5230,5352,5631,6307,6309,6342,6652,7167,7358,8566,8985,9524,10682,10994,29920,51380,51495,114876,501,3939,5315,6389,6611,8974,11112,1629,4329,5096,79731,5033	ADA,ALDOC,BCAT2,DHCR7,CYB5R3,GLUD1,MIF,OAT,PGK1,PLOD2,PRPS1,MSMO1,SC5D,SCP2,SORD,TPI1,UGDH,PDXK,PLOD3,TECR,EBP,ILVBL,PYCR2,CSAD,HACD3,OSBPL1A,ALDH7A1,LDHA,PKM,SDHA,SMS,P4HA2,HIBADH,DBT,ALDH6A1,PCCB,NARS2,P4HA1
12_Member	GO Biological Processes	GO:0044283	small molecule biosynthetic process	-11.2939	-8.24541	26/443	100,230,587,1717,1727,2746,4282,4942,5230,5352,5631,6307,6309,6342,6652,7167,7358,8566,8985,9524,10682,10994,29920,51380,51495,114876	ADA,ALDOC,BCAT2,DHCR7,CYB5R3,GLUD1,MIF,OAT,PGK1,PLOD2,PRPS1,MSMO1,SC5D,SCP2,SORD,TPI1,UGDH,PDXK,PLOD3,TECR,EBP,ILVBL,PYCR2,CSAD,HACD3,OSBPL1A
12_Member	WikiPathways	WP3925	Amino acid metabolism	-6.1349	-3.89938	9/91	501,2746,3939,4942,5315,6389,6611,8974,11112	ALDH7A1,GLUD1,LDHA,OAT,PKM,SDHA,SMS,P4HA2,HIBADH
12_Member	GO Biological Processes	GO:0016053	organic acid biosynthetic process	-5.70201	-3.51986	14/270	587,2746,4282,4942,5352,6342,7358,8985,9524,10994,29920,51380,51495,114876	BCAT2,GLUD1,MIF,OAT,PLOD2,SCP2,UGDH,PLOD3,TECR,ILVBL,PYCR2,CSAD,HACD3,OSBPL1A
12_Member	GO Biological Processes	GO:0006520	amino acid metabolic process	-5.50012	-3.35747	14/281	587,1629,2746,4329,4942,5096,5352,6611,8985,10994,11112,29920,51380,79731	BCAT2,DBT,GLUD1,ALDH6A1,OAT,PCCB,PLOD2,SMS,PLOD3,ILVBL,HIBADH,PYCR2,CSAD,NARS2
12_Member	GO Biological Processes	GO:0046394	carboxylic acid biosynthetic process	-5.05891	-3.00391	13/266	587,2746,4282,4942,5352,6342,7358,8985,9524,10994,29920,51495,114876	BCAT2,GLUD1,MIF,OAT,PLOD2,SCP2,UGDH,PLOD3,TECR,ILVBL,PYCR2,HACD3,OSBPL1A
12_Member	GO Biological Processes	GO:1901607	alpha-amino acid biosynthetic process	-5.05258	-3.00196	7/67	587,2746,4942,5352,8985,10994,29920	BCAT2,GLUD1,OAT,PLOD2,PLOD3,ILVBL,PYCR2
12_Member	GO Biological Processes	GO:1901605	alpha-amino acid metabolic process	-4.88207	-2.86504	11/198	587,2746,4329,4942,5352,6611,8985,10994,11112,29920,51380	BCAT2,GLUD1,ALDH6A1,OAT,PLOD2,SMS,PLOD3,ILVBL,HIBADH,PYCR2,CSAD
12_Member	KEGG Pathway	hsa00330	Arginine and proline metabolism	-4.75452	-2.77054	6/50	501,4942,5033,6611,8974,29920	ALDH7A1,OAT,P4HA1,SMS,P4HA2,PYCR2
12_Member	GO Biological Processes	GO:0008652	amino acid biosynthetic process	-4.72673	-2.74832	7/75	587,2746,4942,5352,8985,10994,29920	BCAT2,GLUD1,OAT,PLOD2,PLOD3,ILVBL,PYCR2
12_Member	Reactome Gene Sets	R-HSA-8964539	Glutamate and glutamine metabolism	-3.36156	-1.672	3/14	2746,4942,29920	GLUD1,OAT,PYCR2
12_Member	GO Biological Processes	GO:0009084	glutamine family amino acid biosynthetic process	-3.18154	-1.53363	3/16	2746,4942,29920	GLUD1,OAT,PYCR2
12_Member	WikiPathways	WP497	Urea cycle and metabolism of amino groups	-2.82351	-1.25695	3/21	2746,4942,6611	GLUD1,OAT,SMS
13_Summary	WikiPathways	WP3888	VEGFA-VEGFR2 signaling pathway	-10.747	-7.77773	25/432	226,301,378,682,824,2597,2746,2885,3418,3939,3998,5034,5058,5230,5604,5747,5829,5868,6902,7430,8411,8974,8985,10130,10397	ALDOA,ANXA1,ARF4,BSG,CAPN2,GAPDH,GLUD1,GRB2,IDH2,LDHA,LMAN1,P4HB,PAK1,PGK1,MAP2K1,PTK2,PXN,RAB5A,TBCA,EZR,EEA1,P4HA2,PLOD3,PDIA6,NDRG1
13_Member	WikiPathways	WP3888	VEGFA-VEGFR2 signaling pathway	-10.747	-7.77773	25/432	226,301,378,682,824,2597,2746,2885,3418,3939,3998,5034,5058,5230,5604,5747,5829,5868,6902,7430,8411,8974,8985,10130,10397	ALDOA,ANXA1,ARF4,BSG,CAPN2,GAPDH,GLUD1,GRB2,IDH2,LDHA,LMAN1,P4HB,PAK1,PGK1,MAP2K1,PTK2,PXN,RAB5A,TBCA,EZR,EEA1,P4HA2,PLOD3,PDIA6,NDRG1
14_Summary	GO Biological Processes	GO:0006979	response to oxidative stress	-10.6416	-7.73926	23/366	301,351,824,847,3039,3040,3043,3163,5052,5829,6810,8815,9943,10549,10550,10935,29920,29957,30001,55139,56616,79956,80777,6513,65267	ANXA1,APP,CAPN2,CAT,HBA1,HBA2,HBB,HMOX2,PRDX1,PXN,STX4,BANF1,OXSR1,PRDX4,ARL6IP5,PRDX3,PYCR2,SLC25A24,ERO1A,ANKZF1,DIABLO,ERMP1,CYB5B,SLC2A1,WNK3
14_Member	GO Biological Processes	GO:0006979	response to oxidative stress	-10.6416	-7.73926	23/366	301,351,824,847,3039,3040,3043,3163,5052,5829,6810,8815,9943,10549,10550,10935,29920,29957,30001,55139,56616,79956,80777	ANXA1,APP,CAPN2,CAT,HBA1,HBA2,HBB,HMOX2,PRDX1,PXN,STX4,BANF1,OXSR1,PRDX4,ARL6IP5,PRDX3,PYCR2,SLC25A24,ERO1A,ANKZF1,DIABLO,ERMP1,CYB5B
14_Member	GO Biological Processes	GO:0062197	cellular response to chemical stress	-6.36515	-4.07637	15/274	301,847,5052,5829,6513,6810,9943,10550,10935,29920,29957,55139,56616,65267,79956	ANXA1,CAT,PRDX1,PXN,SLC2A1,STX4,OXSR1,ARL6IP5,PRDX3,PYCR2,SLC25A24,ANKZF1,DIABLO,WNK3,ERMP1
14_Member	GO Biological Processes	GO:0034599	cellular response to oxidative stress	-5.11306	-3.05362	12/224	301,847,5052,5829,6810,10550,10935,29920,29957,55139,56616,79956	ANXA1,CAT,PRDX1,PXN,STX4,ARL6IP5,PRDX3,PYCR2,SLC25A24,ANKZF1,DIABLO,ERMP1
15_Summary	GO Biological Processes	GO:0010256	endomembrane system organization	-9.96181	-7.19213	27/549	309,523,928,3998,5869,6810,7905,8411,8815,9525,10313,10397,10972,11018,22931,23204,23344,23423,26509,51234,54732,55161,57142,79188,163590,196527,222068,302,581,2773,2934,3099,9218,9341,10016,10640,54947,91869,375790	ANXA6,ATP6V1A,CD9,LMAN1,RAB5B,STX4,REEP5,EEA1,BANF1,VPS4B,RTN3,NDRG1,TMED10,TMED1,RAB18,ARL6IP1,ESYT1,TMED3,MYOF,EMC4,TMED9,TMEM33,RTN4,TMEM43,TOR1AIP2,ANO6,TMED4,ANXA2,BAX,GNAI3,GSN,HK2,VAPA,VAMP3,PDCD6,EXOC5,LPCAT2,RFT1,AGRN
15_Member	GO Biological Processes	GO:0010256	endomembrane system organization	-9.96181	-7.19213	27/549	309,523,928,3998,5869,6810,7905,8411,8815,9525,10313,10397,10972,11018,22931,23204,23344,23423,26509,51234,54732,55161,57142,79188,163590,196527,222068	ANXA6,ATP6V1A,CD9,LMAN1,RAB5B,STX4,REEP5,EEA1,BANF1,VPS4B,RTN3,NDRG1,TMED10,TMED1,RAB18,ARL6IP1,ESYT1,TMED3,MYOF,EMC4,TMED9,TMEM33,RTN4,TMEM43,TOR1AIP2,ANO6,TMED4
15_Member	GO Biological Processes	GO:0061024	membrane organization	-9.4332	-6.76497	31/754	302,309,581,928,2773,2934,3099,6810,7905,8411,8815,9218,9341,9525,10016,10397,10640,10972,23204,23344,26509,51234,54732,54947,55161,57142,79188,91869,163590,196527,375790	ANXA2,ANXA6,BAX,CD9,GNAI3,GSN,HK2,STX4,REEP5,EEA1,BANF1,VAPA,VAMP3,VPS4B,PDCD6,NDRG1,EXOC5,TMED10,ARL6IP1,ESYT1,MYOF,EMC4,TMED9,LPCAT2,TMEM33,RTN4,TMEM43,RFT1,TOR1AIP2,ANO6,AGRN
16_Summary	GO Biological Processes	GO:0052547	regulation of peptidase activity	-9.37834	-6.72784	23/424	334,351,444,581,1476,1508,1992,2597,2810,2934,4035,5447,6692,7448,10016,10134,10550,10935,10972,23204,26355,51024,56616,302,2023,2147,5747,301,7009,50848,1974,2773,2776,8815,27250,64793	APLP2,APP,ASPH,BAX,CSTB,CTSB,SERPINB1,GAPDH,SFN,GSN,LRP1,POR,SPINT1,VTN,PDCD6,BCAP31,ARL6IP5,PRDX3,TMED10,ARL6IP1,FAM162A,FIS1,DIABLO,ANXA2,ENO1,F2,PTK2,ANXA1,TMBIM6,F11R,EIF4A2,GNAI3,GNAQ,BANF1,PDCD4,CEP85
16_Member	GO Biological Processes	GO:0052547	regulation of peptidase activity	-9.37834	-6.72784	23/424	334,351,444,581,1476,1508,1992,2597,2810,2934,4035,5447,6692,7448,10016,10134,10550,10935,10972,23204,26355,51024,56616	APLP2,APP,ASPH,BAX,CSTB,CTSB,SERPINB1,GAPDH,SFN,GSN,LRP1,POR,SPINT1,VTN,PDCD6,BCAP31,ARL6IP5,PRDX3,TMED10,ARL6IP1,FAM162A,FIS1,DIABLO
16_Member	GO Biological Processes	GO:0030162	regulation of proteolysis	-7.37368	-4.9327	27/726	302,334,351,444,581,1476,1508,1992,2023,2147,2597,2810,2934,4035,5447,5747,6692,7448,10016,10134,10550,10935,10972,23204,26355,51024,56616	ANXA2,APLP2,APP,ASPH,BAX,CSTB,CTSB,SERPINB1,ENO1,F2,GAPDH,SFN,GSN,LRP1,POR,PTK2,SPINT1,VTN,PDCD6,BCAP31,ARL6IP5,PRDX3,TMED10,ARL6IP1,FAM162A,FIS1,DIABLO
16_Member	GO Biological Processes	GO:0051346	negative regulation of hydrolase activity	-6.50456	-4.18039	17/344	301,334,351,1476,1508,1992,2597,2810,4035,5447,6692,7009,7448,10935,10972,23204,50848	ANXA1,APLP2,APP,CSTB,CTSB,SERPINB1,GAPDH,SFN,LRP1,POR,SPINT1,TMBIM6,VTN,PRDX3,TMED10,ARL6IP1,F11R
16_Member	GO Biological Processes	GO:0010466	negative regulation of peptidase activity	-6.41969	-4.11161	14/235	334,351,1476,1508,1992,2597,2810,4035,5447,6692,7448,10935,10972,23204	APLP2,APP,CSTB,CTSB,SERPINB1,GAPDH,SFN,LRP1,POR,SPINT1,VTN,PRDX3,TMED10,ARL6IP1
16_Member	GO Biological Processes	GO:0043086	negative regulation of catalytic activity	-5.80996	-3.61583	23/666	301,334,351,1476,1508,1974,1992,2597,2773,2776,2810,4035,5447,6692,7009,7448,8815,10935,10972,23204,27250,50848,64793	ANXA1,APLP2,APP,CSTB,CTSB,EIF4A2,SERPINB1,GAPDH,GNAI3,GNAQ,SFN,LRP1,POR,SPINT1,TMBIM6,VTN,BANF1,PRDX3,TMED10,ARL6IP1,PDCD4,F11R,CEP85
16_Member	GO Biological Processes	GO:0045861	negative regulation of proteolysis	-5.37941	-3.26039	15/329	334,351,1476,1508,1992,2147,2597,2810,4035,5447,6692,7448,10935,10972,23204	APLP2,APP,CSTB,CTSB,SERPINB1,F2,GAPDH,SFN,LRP1,POR,SPINT1,VTN,PRDX3,TMED10,ARL6IP1
16_Member	GO Biological Processes	GO:0010951	negative regulation of endopeptidase activity	-3.39205	-1.69288	8/160	1992,2597,2810,5447,7448,10935,10972,23204	SERPINB1,GAPDH,SFN,POR,VTN,PRDX3,TMED10,ARL6IP1
17_Summary	KEGG Pathway	hsa00051	Fructose and mannose metabolism	-8.67715	-6.07586	8/33	226,230,3099,4351,5210,6652,7167,26007,2530,2632,5230,9526,54187,2548,3418	ALDOA,ALDOC,HK2,MPI,PFKFB4,SORD,TPI1,TKFC,FUT8,GBE1,PGK1,MPDU1,NANS,GAA,IDH2
17_Member	KEGG Pathway	hsa00051	Fructose and mannose metabolism	-8.67715	-6.07586	8/33	226,230,3099,4351,5210,6652,7167,26007	ALDOA,ALDOC,HK2,MPI,PFKFB4,SORD,TPI1,TKFC
17_Member	GO Biological Processes	GO:0006000	fructose metabolic process	-6.54649	-4.2182	5/14	226,230,5210,6652,26007	ALDOA,ALDOC,PFKFB4,SORD,TKFC
17_Member	GO Biological Processes	GO:0019405	alditol catabolic process	-4.3538	-2.45612	3/7	6652,7167,26007	SORD,TPI1,TKFC
17_Member	GO Biological Processes	GO:0016051	carbohydrate biosynthetic process	-3.9856	-2.15987	8/131	230,2530,2632,5230,6652,7167,9526,54187	ALDOC,FUT8,GBE1,PGK1,SORD,TPI1,MPDU1,NANS
17_Member	GO Biological Processes	GO:0044275	cellular carbohydrate catabolic process	-3.39705	-1.69356	4/32	2548,6652,7167,26007	GAA,SORD,TPI1,TKFC
17_Member	GO Biological Processes	GO:0044262	cellular carbohydrate metabolic process	-3.33831	-1.65254	8/163	2548,2632,3099,3418,5210,6652,7167,26007	GAA,GBE1,HK2,IDH2,PFKFB4,SORD,TPI1,TKFC
17_Member	GO Biological Processes	GO:0019400	alditol metabolic process	-2.76336	-1.21666	3/22	6652,7167,26007	SORD,TPI1,TKFC
17_Member	GO Biological Processes	GO:0019319	hexose biosynthetic process	-2.72352	-1.18763	4/48	230,5230,6652,7167	ALDOC,PGK1,SORD,TPI1
17_Member	GO Biological Processes	GO:0046835	carbohydrate phosphorylation	-2.5997	-1.08823	3/25	3099,5210,26007	HK2,PFKFB4,TKFC
17_Member	GO Biological Processes	GO:0046364	monosaccharide biosynthetic process	-2.59497	-1.08623	4/52	230,5230,6652,7167	ALDOC,PGK1,SORD,TPI1
17_Member	GO Biological Processes	GO:0046174	polyol catabolic process	-2.50233	-1.02091	3/27	6652,7167,26007	SORD,TPI1,TKFC
18_Summary	KEGG Pathway	hsa05132	Salmonella infection	-8.55168	-5.95809	17/249	302,581,1778,2316,2597,5058,5217,5604,5868,5869,5898,7184,10120,10640,79026,83658,140735	ANXA2,BAX,DYNC1H1,FLNA,GAPDH,PAK1,PFN2,MAP2K1,RAB5A,RAB5B,RALA,HSP90B1,ACTR1B,EXOC5,AHNAK,DYNLRB1,DYNLL2
18_Member	KEGG Pathway	hsa05132	Salmonella infection	-8.55168	-5.95809	17/249	302,581,1778,2316,2597,5058,5217,5604,5868,5869,5898,7184,10120,10640,79026,83658,140735	ANXA2,BAX,DYNC1H1,FLNA,GAPDH,PAK1,PFN2,MAP2K1,RAB5A,RAB5B,RALA,HSP90B1,ACTR1B,EXOC5,AHNAK,DYNLRB1,DYNLL2
19_Summary	GO Biological Processes	GO:0019725	cellular homeostasis	-8.34149	-5.77735	27/652	226,309,351,476,523,525,581,2147,2495,2548,3099,5052,6717,7009,7184,9497,10134,10549,10568,10935,25932,30001,51024,57142,64710,65267,196527,3163,57402	ALDOA,ANXA6,APP,ATP1A1,ATP6V1A,ATP6V1B1,BAX,F2,FTH1,GAA,HK2,PRDX1,SRI,TMBIM6,HSP90B1,SLC4A7,BCAP31,PRDX4,SLC34A2,PRDX3,CLIC4,ERO1A,FIS1,RTN4,NUCKS1,WNK3,ANO6,HMOX2,S100A14
19_Member	GO Biological Processes	GO:0019725	cellular homeostasis	-8.34149	-5.77735	27/652	226,309,351,476,523,525,581,2147,2495,2548,3099,5052,6717,7009,7184,9497,10134,10549,10568,10935,25932,30001,51024,57142,64710,65267,196527	ALDOA,ANXA6,APP,ATP1A1,ATP6V1A,ATP6V1B1,BAX,F2,FTH1,GAA,HK2,PRDX1,SRI,TMBIM6,HSP90B1,SLC4A7,BCAP31,PRDX4,SLC34A2,PRDX3,CLIC4,ERO1A,FIS1,RTN4,NUCKS1,WNK3,ANO6
19_Member	GO Biological Processes	GO:0055082	cellular chemical homeostasis	-4.94185	-2.91252	19/546	309,351,476,523,525,581,2147,2495,3099,6717,7009,7184,9497,10134,10568,25932,51024,57142,64710	ANXA6,APP,ATP1A1,ATP6V1A,ATP6V1B1,BAX,F2,FTH1,HK2,SRI,TMBIM6,HSP90B1,SLC4A7,BCAP31,SLC34A2,CLIC4,FIS1,RTN4,NUCKS1
19_Member	GO Biological Processes	GO:0050801	monoatomic ion homeostasis	-4.8268	-2.82368	18/507	309,351,476,523,525,581,2147,2495,3163,6717,7009,7184,9497,10134,25932,51024,57402,65267	ANXA6,APP,ATP1A1,ATP6V1A,ATP6V1B1,BAX,F2,FTH1,HMOX2,SRI,TMBIM6,HSP90B1,SLC4A7,BCAP31,CLIC4,FIS1,S100A14,WNK3
19_Member	GO Biological Processes	GO:0098771	inorganic ion homeostasis	-4.56076	-2.62291	16/433	309,351,476,523,525,581,2147,2495,3163,6717,7009,7184,10134,10568,51024,57402	ANXA6,APP,ATP1A1,ATP6V1A,ATP6V1B1,BAX,F2,FTH1,HMOX2,SRI,TMBIM6,HSP90B1,BCAP31,SLC34A2,FIS1,S100A14
19_Member	GO Biological Processes	GO:0055080	monoatomic cation homeostasis	-4.40988	-2.50132	17/495	309,351,476,523,525,581,2147,2495,3163,6717,7009,7184,9497,10134,25932,51024,57402	ANXA6,APP,ATP1A1,ATP6V1A,ATP6V1B1,BAX,F2,FTH1,HMOX2,SRI,TMBIM6,HSP90B1,SLC4A7,BCAP31,CLIC4,FIS1,S100A14
19_Member	GO Biological Processes	GO:0030003	cellular monoatomic cation homeostasis	-4.34686	-2.45071	15/403	309,351,476,523,525,581,2147,2495,6717,7009,7184,9497,10134,25932,51024	ANXA6,APP,ATP1A1,ATP6V1A,ATP6V1B1,BAX,F2,FTH1,SRI,TMBIM6,HSP90B1,SLC4A7,BCAP31,CLIC4,FIS1
19_Member	GO Biological Processes	GO:0055065	metal ion homeostasis	-4.26249	-2.38869	15/410	309,351,476,523,525,581,2147,2495,3163,6717,7009,7184,10134,51024,57402	ANXA6,APP,ATP1A1,ATP6V1A,ATP6V1B1,BAX,F2,FTH1,HMOX2,SRI,TMBIM6,HSP90B1,BCAP31,FIS1,S100A14
19_Member	GO Biological Processes	GO:0006873	cellular monoatomic ion homeostasis	-4.23874	-2.37071	15/412	309,351,476,523,525,581,2147,2495,6717,7009,7184,9497,10134,25932,51024	ANXA6,APP,ATP1A1,ATP6V1A,ATP6V1B1,BAX,F2,FTH1,SRI,TMBIM6,HSP90B1,SLC4A7,BCAP31,CLIC4,FIS1
19_Member	GO Biological Processes	GO:0055074	calcium ion homeostasis	-3.68579	-1.92291	10/225	309,351,525,581,2147,7009,7184,10134,51024,57402	ANXA6,APP,ATP6V1B1,BAX,F2,TMBIM6,HSP90B1,BCAP31,FIS1,S100A14
19_Member	GO Biological Processes	GO:0006875	cellular metal ion homeostasis	-3.59472	-1.84839	12/322	309,351,476,523,581,2147,2495,6717,7009,7184,10134,51024	ANXA6,APP,ATP1A1,ATP6V1A,BAX,F2,FTH1,SRI,TMBIM6,HSP90B1,BCAP31,FIS1
19_Member	GO Biological Processes	GO:0006874	cellular calcium ion homeostasis	-2.77774	-1.22066	8/199	309,351,581,2147,7009,7184,10134,51024	ANXA6,APP,BAX,F2,TMBIM6,HSP90B1,BCAP31,FIS1
20_Summary	GO Biological Processes	GO:0042743	hydrogen peroxide metabolic process	-8.05547	-5.54354	8/39	51,847,3039,3040,3043,5052,10549,10935,1282,2495,4035,7184,51700,301,824,5829,55139,2147,5034,30001,3163,2776,581,999	ACOX1,CAT,HBA1,HBA2,HBB,PRDX1,PRDX4,PRDX3,COL4A1,FTH1,LRP1,HSP90B1,CYB5R2,ANXA1,CAPN2,PXN,ANKZF1,F2,P4HB,ERO1A,HMOX2,GNAQ,BAX,CDH1
20_Member	GO Biological Processes	GO:0042743	hydrogen peroxide metabolic process	-8.05547	-5.54354	8/39	51,847,3039,3040,3043,5052,10549,10935	ACOX1,CAT,HBA1,HBA2,HBB,PRDX1,PRDX4,PRDX3
20_Member	GO Biological Processes	GO:0042744	hydrogen peroxide catabolic process	-7.88034	-5.39965	7/27	847,3039,3040,3043,5052,10549,10935	CAT,HBA1,HBA2,HBB,PRDX1,PRDX4,PRDX3
20_Member	Reactome Gene Sets	R-HSA-2173782	Binding and Uptake of Ligands by Scavenger Receptors	-6.45904	-4.14299	7/42	1282,2495,3039,3040,3043,4035,7184	COL4A1,FTH1,HBA1,HBA2,HBB,LRP1,HSP90B1
20_Member	Reactome Gene Sets	R-HSA-1237044	Erythrocytes take up carbon dioxide and release oxygen	-5.02717	-2.98305	4/13	3039,3040,3043,51700	HBA1,HBA2,HBB,CYB5R2
20_Member	Reactome Gene Sets	R-HSA-1480926	O2/CO2 exchange in erythrocytes	-5.02717	-2.98305	4/13	3039,3040,3043,51700	HBA1,HBA2,HBB,CYB5R2
20_Member	Reactome Gene Sets	R-HSA-2168880	Scavenging of heme from plasma	-5.02717	-2.98305	4/13	3039,3040,3043,4035	HBA1,HBA2,HBB,LRP1
20_Member	GO Biological Processes	GO:0030185	nitric oxide transport	-4.89077	-2.86968	3/5	3039,3040,3043	HBA1,HBA2,HBB
20_Member	GO Biological Processes	GO:0072593	reactive oxygen species metabolic process	-4.67153	-2.70909	8/105	51,847,3039,3040,3043,5052,10549,10935	ACOX1,CAT,HBA1,HBA2,HBB,PRDX1,PRDX4,PRDX3
20_Member	GO Biological Processes	GO:0000302	response to reactive oxygen species	-4.65899	-2.70046	10/172	301,824,847,3039,3040,3043,5052,5829,10935,55139	ANXA1,CAPN2,CAT,HBA1,HBA2,HBB,PRDX1,PXN,PRDX3,ANKZF1
20_Member	GO Biological Processes	GO:0042542	response to hydrogen peroxide	-4.64156	-2.69124	8/106	301,824,847,3039,3040,3043,10935,55139	ANXA1,CAPN2,CAT,HBA1,HBA2,HBB,PRDX3,ANKZF1
20_Member	WikiPathways	WP15	Selenium micronutrient network	-4.33888	-2.44729	7/86	847,2147,3039,3043,5052,10549,10935	CAT,F2,HBA1,HBB,PRDX1,PRDX4,PRDX3
20_Member	Reactome Gene Sets	R-HSA-3299685	Detoxification of Reactive Oxygen Species	-4.29847	-2.41734	5/37	847,5034,5052,10935,30001	CAT,P4HB,PRDX1,PRDX3,ERO1A
20_Member	GO Biological Processes	GO:0098869	cellular oxidant detoxification	-4.24304	-2.37214	7/89	847,3039,3040,3043,5052,10549,10935	CAT,HBA1,HBA2,HBB,PRDX1,PRDX4,PRDX3
20_Member	Reactome Gene Sets	R-HSA-1247673	Erythrocytes take up oxygen and release carbon dioxide	-3.98068	-2.15755	3/9	3039,3040,3043	HBA1,HBA2,HBB
20_Member	GO Biological Processes	GO:1990748	cellular detoxification	-3.7889	-2.00763	7/105	847,3039,3040,3043,5052,10549,10935	CAT,HBA1,HBA2,HBB,PRDX1,PRDX4,PRDX3
20_Member	GO Biological Processes	GO:0097237	cellular response to toxic substance	-3.56813	-1.83084	7/114	847,3039,3040,3043,5052,10549,10935	CAT,HBA1,HBA2,HBB,PRDX1,PRDX4,PRDX3
20_Member	Reactome Gene Sets	R-HSA-9711123	Cellular response to chemical stress	-3.42663	-1.71665	9/199	847,3039,3040,3043,3163,5034,5052,10935,30001	CAT,HBA1,HBA2,HBB,HMOX2,P4HB,PRDX1,PRDX3,ERO1A
20_Member	GO Biological Processes	GO:0098754	detoxification	-3.3888	-1.69254	7/122	847,3039,3040,3043,5052,10549,10935	CAT,HBA1,HBA2,HBB,PRDX1,PRDX4,PRDX3
20_Member	GO Biological Processes	GO:0015670	carbon dioxide transport	-3.36156	-1.672	3/14	3039,3040,3043	HBA1,HBA2,HBB
20_Member	GO Biological Processes	GO:0015671	oxygen transport	-3.18154	-1.53363	3/16	3039,3040,3043	HBA1,HBA2,HBB
20_Member	KEGG Pathway	hsa05143	African trypanosomiasis	-3.15174	-1.50899	4/37	2776,3039,3040,3043	GNAQ,HBA1,HBA2,HBB
20_Member	GO Biological Processes	GO:0009636	response to toxic substance	-3.11331	-1.47395	9/220	581,847,999,3039,3040,3043,5052,10549,10935	BAX,CAT,CDH1,HBA1,HBA2,HBB,PRDX1,PRDX4,PRDX3
20_Member	GO Biological Processes	GO:0045454	cell redox homeostasis	-3.02189	-1.40802	4/40	5052,10549,10935,30001	PRDX1,PRDX4,PRDX3,ERO1A
20_Member	GO Biological Processes	GO:0015669	gas transport	-2.76336	-1.21666	3/22	3039,3040,3043	HBA1,HBA2,HBB
20_Member	KEGG Pathway	hsa05144	Malaria	-2.65777	-1.12915	4/50	3039,3040,3043,4035	HBA1,HBA2,HBB,LRP1
20_Member	GO Biological Processes	GO:0034614	cellular response to reactive oxygen species	-2.65283	-1.12636	6/121	301,847,5052,5829,10935,55139	ANXA1,CAT,PRDX1,PXN,PRDX3,ANKZF1
20_Member	GO Biological Processes	GO:0019755	one-carbon compound transport	-2.54997	-1.05662	3/26	3039,3040,3043	HBA1,HBA2,HBB
20_Member	Reactome Gene Sets	R-HSA-9707564	Cytoprotection by HMOX1	-2.26897	-0.851443	4/64	3039,3040,3043,3163	HBA1,HBA2,HBB,HMOX2
20_Member	WikiPathways	WP176	Folate metabolism	-2.15372	-0.763764	4/69	847,2147,3039,3043	CAT,F2,HBA1,HBB

## Sheet: Cluster2_VPM_high
GroupID	Category	Term	Description	LogP	Log(q-value)	InTerm_InList	Genes	Symbols
1_Summary	Reactome Gene Sets	R-HSA-8953854	Metabolism of RNA	-40.5929	-36.2435	64/716	705,1432,1656,1736,1975,2107,2197,2935,3312,5431,5434,5437,5518,5520,5683,5684,5685,5687,5689,5694,5700,5701,5702,5704,5705,5706,5708,5901,6222,6223,7737,9130,9188,9652,10197,10419,10436,10528,10813,10914,11340,23160,23246,23404,23481,23708,27336,51602,51645,51690,53938,55127,55651,55696,55746,55759,56902,57122,57703,79050,79084,84128,84916,134430,1983,3320,3326,3692,5036,6059,8161,8666,8668,8669…	BYSL,MAPK14,DDX6,DKC1,EIF4B,ETF1,FAU,GSPT1,HSPA8,POLR2B,POLR2E,POLR2H,PPP2R1A,PPP2R2A,PSMA2,PSMA3,PSMA4,PSMA6,PSMB1,PSMB6,PSMC1,PSMC2,PSMC3,PSMC4,PSMC5,PSMC6,PSMD2,RAN,RPS18,RPS19,RNF113A,FAM50A,DDX21,SKIC3,PSME3,PRMT5,EMG1,NOP56,UTP14A,PAPOLA,EXOSC8,WDR43,BOP1,EXOSC2,PES1,GSPT2,HTATSF1,NOP58,PPIL1,LSM7,PPIL3,HEATR1,NHP2,RBM22,NUP133,WDR12,PNO1,NUP107,CWC22,NOC4L,WDR77,WDR75,UTP4,WDR36,EIF5,HSP90…
1_Member	Reactome Gene Sets	R-HSA-8953854	Metabolism of RNA	-40.5929	-36.2435	64/716	705,1432,1656,1736,1975,2107,2197,2935,3312,5431,5434,5437,5518,5520,5683,5684,5685,5687,5689,5694,5700,5701,5702,5704,5705,5706,5708,5901,6222,6223,7737,9130,9188,9652,10197,10419,10436,10528,10813,10914,11340,23160,23246,23404,23481,23708,27336,51602,51645,51690,53938,55127,55651,55696,55746,55759,56902,57122,57703,79050,79084,84128,84916,134430	BYSL,MAPK14,DDX6,DKC1,EIF4B,ETF1,FAU,GSPT1,HSPA8,POLR2B,POLR2E,POLR2H,PPP2R1A,PPP2R2A,PSMA2,PSMA3,PSMA4,PSMA6,PSMB1,PSMB6,PSMC1,PSMC2,PSMC3,PSMC4,PSMC5,PSMC6,PSMD2,RAN,RPS18,RPS19,RNF113A,FAM50A,DDX21,SKIC3,PSME3,PRMT5,EMG1,NOP56,UTP14A,PAPOLA,EXOSC8,WDR43,BOP1,EXOSC2,PES1,GSPT2,HTATSF1,NOP58,PPIL1,LSM7,PPIL3,HEATR1,NHP2,RBM22,NUP133,WDR12,PNO1,NUP107,CWC22,NOC4L,WDR77,WDR75,UTP4,WDR36
1_Member	GO Biological Processes	GO:0022613	ribonucleoprotein complex biogenesis	-27.5672	-23.5187	43/466	705,1736,1983,3320,3326,3692,5036,5901,6059,6223,8161,8666,8668,8669,9188,9221,10419,10436,10528,10813,11340,23160,23223,23246,23404,23481,25980,27336,28985,51602,55027,55127,55299,55651,55759,79050,79084,83743,84128,84154,84916,134430,161424	BYSL,DKC1,EIF5,HSP90AA1,HSP90AB1,EIF6,PA2G4,RAN,ABCE1,RPS19,COIL,EIF3G,EIF3I,EIF3J,DDX21,NOLC1,PRMT5,EMG1,NOP56,UTP14A,EXOSC8,WDR43,RRP12,BOP1,EXOSC2,PES1,AAR2,HTATSF1,MCTS1,NOP58,HEATR3,HEATR1,BRIX1,NHP2,WDR12,NOC4L,WDR77,GRWD1,WDR75,RPF2,UTP4,WDR36,NOP9
1_Member	GO Biological Processes	GO:0034660	ncRNA metabolic process	-21.8802	-18.3089	39/514	705,833,1615,1736,2617,3692,5036,5917,6223,6301,7257,7453,7737,8565,9188,9221,10436,10528,10813,11340,23160,23223,23246,23404,23481,51602,53918,55127,55299,55651,55759,56931,57510,79050,84128,84154,84916,134430,161424	BYSL,CARS1,DARS1,DKC1,GARS1,EIF6,PA2G4,RARS1,RPS19,SARS1,TSNAX,WARS1,RNF113A,YARS1,DDX21,NOLC1,EMG1,NOP56,UTP14A,EXOSC8,WDR43,RRP12,BOP1,EXOSC2,PES1,NOP58,PELO,HEATR1,BRIX1,NHP2,WDR12,DUS3L,XPO5,NOC4L,WDR75,RPF2,UTP4,WDR36,NOP9
1_Member	GO Biological Processes	GO:0042254	ribosome biogenesis	-21.7502	-18.2459	31/291	705,1736,3692,5036,5901,6059,6223,9188,9221,10436,10528,10813,11340,23160,23223,23246,23404,23481,51602,55027,55127,55299,55651,55759,79050,83743,84128,84154,84916,134430,161424	BYSL,DKC1,EIF6,PA2G4,RAN,ABCE1,RPS19,DDX21,NOLC1,EMG1,NOP56,UTP14A,EXOSC8,WDR43,RRP12,BOP1,EXOSC2,PES1,NOP58,HEATR3,HEATR1,BRIX1,NHP2,WDR12,NOC4L,GRWD1,WDR75,RPF2,UTP4,WDR36,NOP9
1_Member	GO Biological Processes	GO:0006364	rRNA processing	-21.1004	-17.6541	27/211	705,1736,3692,5036,6223,9188,9221,10436,10528,10813,11340,23160,23223,23246,23404,23481,51602,55127,55299,55651,55759,79050,84128,84154,84916,134430,161424	BYSL,DKC1,EIF6,PA2G4,RPS19,DDX21,NOLC1,EMG1,NOP56,UTP14A,EXOSC8,WDR43,RRP12,BOP1,EXOSC2,PES1,NOP58,HEATR1,BRIX1,NHP2,WDR12,NOC4L,WDR75,RPF2,UTP4,WDR36,NOP9
1_Member	GO Biological Processes	GO:0016072	rRNA metabolic process	-20.6564	-17.2612	28/242	705,1736,3692,5036,6223,9188,9221,10436,10528,10813,11340,23160,23223,23246,23404,23481,51602,53918,55127,55299,55651,55759,79050,84128,84154,84916,134430,161424	BYSL,DKC1,EIF6,PA2G4,RPS19,DDX21,NOLC1,EMG1,NOP56,UTP14A,EXOSC8,WDR43,RRP12,BOP1,EXOSC2,PES1,NOP58,PELO,HEATR1,BRIX1,NHP2,WDR12,NOC4L,WDR75,RPF2,UTP4,WDR36,NOP9
1_Member	Reactome Gene Sets	R-HSA-8868773	rRNA processing in the nucleus and cytosol	-17.231	-14.2795	23/195	705,1736,2197,6222,6223,9188,10436,10528,10813,11340,23160,23246,23404,23481,51602,55127,55651,55759,56902,79050,84128,84916,134430	BYSL,DKC1,FAU,RPS18,RPS19,DDX21,EMG1,NOP56,UTP14A,EXOSC8,WDR43,BOP1,EXOSC2,PES1,NOP58,HEATR1,NHP2,WDR12,PNO1,NOC4L,WDR75,UTP4,WDR36
1_Member	GO Biological Processes	GO:0034470	ncRNA processing	-17.2025	-14.268	31/416	705,1736,3692,5036,6223,6301,7257,7737,9188,9221,10436,10528,10813,11340,23160,23223,23246,23404,23481,51602,55127,55299,55651,55759,56931,79050,84128,84154,84916,134430,161424	BYSL,DKC1,EIF6,PA2G4,RPS19,SARS1,TSNAX,RNF113A,DDX21,NOLC1,EMG1,NOP56,UTP14A,EXOSC8,WDR43,RRP12,BOP1,EXOSC2,PES1,NOP58,HEATR1,BRIX1,NHP2,WDR12,DUS3L,NOC4L,WDR75,RPF2,UTP4,WDR36,NOP9
1_Member	Reactome Gene Sets	R-HSA-72312	rRNA processing	-16.7411	-13.883	23/205	705,1736,2197,6222,6223,9188,10436,10528,10813,11340,23160,23246,23404,23481,51602,55127,55651,55759,56902,79050,84128,84916,134430	BYSL,DKC1,FAU,RPS18,RPS19,DDX21,EMG1,NOP56,UTP14A,EXOSC8,WDR43,BOP1,EXOSC2,PES1,NOP58,HEATR1,NHP2,WDR12,PNO1,NOC4L,WDR75,UTP4,WDR36
1_Member	Reactome Gene Sets	R-HSA-6791226	Major pathway of rRNA processing in the nucleolus and cytosol	-15.4325	-12.8892	21/185	705,2197,6222,6223,9188,10436,10528,10813,11340,23160,23246,23404,23481,51602,55127,55759,56902,79050,84128,84916,134430	BYSL,FAU,RPS18,RPS19,DDX21,EMG1,NOP56,UTP14A,EXOSC8,WDR43,BOP1,EXOSC2,PES1,NOP58,HEATR1,WDR12,PNO1,NOC4L,WDR75,UTP4,WDR36
1_Member	Reactome Gene Sets	R-HSA-6790901	rRNA modification in the nucleus and cytosol	-13.4049	-11.0725	13/61	1736,10436,10528,10813,23160,51602,55127,55651,56902,79050,84128,84916,134430	DKC1,EMG1,NOP56,UTP14A,WDR43,NOP58,HEATR1,NHP2,PNO1,NOC4L,WDR75,UTP4,WDR36
1_Member	KEGG Pathway	hsa03008	Ribosome biogenesis in eukaryotes	-10.7383	-8.60371	14/118	1460,1736,3692,5901,10436,10528,10813,23160,51602,55127,55651,84128,84916,134430	CSNK2B,DKC1,EIF6,RAN,EMG1,NOP56,UTP14A,WDR43,NOP58,HEATR1,NHP2,WDR75,UTP4,WDR36
2_Summary	Reactome Gene Sets	R-HSA-1640170	Cell Cycle	-27.1442	-23.2718	50/692	1460,1736,2237,2932,3320,3326,4171,4999,5000,5111,5425,5431,5434,5437,5518,5520,5683,5684,5685,5687,5689,5694,5700,5701,5702,5704,5705,5706,5708,5901,6241,7083,7280,10197,10383,10540,10592,10726,10844,27229,54107,55291,55559,55651,55746,57122,64151,64785,84296,203068,1432,3312,11340,23404,7296,8878,7323,54583,11059,440,1915,2197,2475,3301,6222,6223,7266,10808,833,1445,1937,5291,5894,7414,8546,103…	CSNK2B,DKC1,FEN1,GSK3B,HSP90AA1,HSP90AB1,MCM2,ORC2,ORC4,PCNA,POLD2,POLR2B,POLR2E,POLR2H,PPP2R1A,PPP2R2A,PSMA2,PSMA3,PSMA4,PSMA6,PSMB1,PSMB6,PSMC1,PSMC2,PSMC3,PSMC4,PSMC5,PSMC6,PSMD2,RAN,RRM2,TK1,TUBB2A,PSME3,TUBB4B,DCTN2,SMC2,NUDC,TUBGCP2,TUBGCP4,POLE3,PPP6R3,HAUS7,NHP2,NUP133,NUP107,NCAPG,GINS3,GINS4,TUBB,MAPK14,HSPA8,EXOSC8,EXOSC2,TXNRD1,SQSTM1,UBE2D3,EGLN1,WWP1,ASNS,EEF1A1,FAU,MTOR,DNAJA1,RPS1…
2_Member	Reactome Gene Sets	R-HSA-1640170	Cell Cycle	-27.1442	-23.2718	50/692	1460,1736,2237,2932,3320,3326,4171,4999,5000,5111,5425,5431,5434,5437,5518,5520,5683,5684,5685,5687,5689,5694,5700,5701,5702,5704,5705,5706,5708,5901,6241,7083,7280,10197,10383,10540,10592,10726,10844,27229,54107,55291,55559,55651,55746,57122,64151,64785,84296,203068	CSNK2B,DKC1,FEN1,GSK3B,HSP90AA1,HSP90AB1,MCM2,ORC2,ORC4,PCNA,POLD2,POLR2B,POLR2E,POLR2H,PPP2R1A,PPP2R2A,PSMA2,PSMA3,PSMA4,PSMA6,PSMB1,PSMB6,PSMC1,PSMC2,PSMC3,PSMC4,PSMC5,PSMC6,PSMD2,RAN,RRM2,TK1,TUBB2A,PSME3,TUBB4B,DCTN2,SMC2,NUDC,TUBGCP2,TUBGCP4,POLE3,PPP6R3,HAUS7,NHP2,NUP133,NUP107,NCAPG,GINS3,GINS4,TUBB
2_Member	Reactome Gene Sets	R-HSA-69278	Cell Cycle, Mitotic	-25.2877	-21.5403	44/561	1460,2237,2932,3320,3326,4171,4999,5000,5111,5425,5518,5520,5683,5684,5685,5687,5689,5694,5700,5701,5702,5704,5705,5706,5708,5901,6241,7083,7280,10197,10383,10540,10592,10726,10844,27229,54107,55559,55746,57122,64151,64785,84296,203068	CSNK2B,FEN1,GSK3B,HSP90AA1,HSP90AB1,MCM2,ORC2,ORC4,PCNA,POLD2,PPP2R1A,PPP2R2A,PSMA2,PSMA3,PSMA4,PSMA6,PSMB1,PSMB6,PSMC1,PSMC2,PSMC3,PSMC4,PSMC5,PSMC6,PSMD2,RAN,RRM2,TK1,TUBB2A,PSME3,TUBB4B,DCTN2,SMC2,NUDC,TUBGCP2,TUBGCP4,POLE3,HAUS7,NUP133,NUP107,NCAPG,GINS3,GINS4,TUBB
2_Member	Reactome Gene Sets	R-HSA-69239	Synthesis of DNA	-22.0906	-18.4401	23/121	2237,4171,4999,5000,5111,5425,5683,5684,5685,5687,5689,5694,5700,5701,5702,5704,5705,5706,5708,10197,54107,64785,84296	FEN1,MCM2,ORC2,ORC4,PCNA,POLD2,PSMA2,PSMA3,PSMA4,PSMA6,PSMB1,PSMB6,PSMC1,PSMC2,PSMC3,PSMC4,PSMC5,PSMC6,PSMD2,PSME3,POLE3,GINS3,GINS4
2_Member	Reactome Gene Sets	R-HSA-69242	S Phase	-20.2735	-16.924	24/163	2237,2932,4171,4999,5000,5111,5425,5683,5684,5685,5687,5689,5694,5700,5701,5702,5704,5705,5706,5708,10197,54107,64785,84296	FEN1,GSK3B,MCM2,ORC2,ORC4,PCNA,POLD2,PSMA2,PSMA3,PSMA4,PSMA6,PSMB1,PSMB6,PSMC1,PSMC2,PSMC3,PSMC4,PSMC5,PSMC6,PSMD2,PSME3,POLE3,GINS3,GINS4
2_Member	Reactome Gene Sets	R-HSA-453279	Mitotic G1 phase and G1/S transition	-19.9288	-16.6417	23/149	4171,4999,5000,5111,5518,5520,5683,5684,5685,5687,5689,5694,5700,5701,5702,5704,5705,5706,5708,6241,7083,10197,54107	MCM2,ORC2,ORC4,PCNA,PPP2R1A,PPP2R2A,PSMA2,PSMA3,PSMA4,PSMA6,PSMB1,PSMB6,PSMC1,PSMC2,PSMC3,PSMC4,PSMC5,PSMC6,PSMD2,RRM2,TK1,PSME3,POLE3
2_Member	Reactome Gene Sets	R-HSA-69206	G1/S Transition	-19.912	-16.6417	22/131	4171,4999,5000,5111,5518,5683,5684,5685,5687,5689,5694,5700,5701,5702,5704,5705,5706,5708,6241,7083,10197,54107	MCM2,ORC2,ORC4,PCNA,PPP2R1A,PSMA2,PSMA3,PSMA4,PSMA6,PSMB1,PSMB6,PSMC1,PSMC2,PSMC3,PSMC4,PSMC5,PSMC6,PSMD2,RRM2,TK1,PSME3,POLE3
2_Member	Reactome Gene Sets	R-HSA-69275	G2/M Transition	-19.5319	-16.2964	25/196	3320,3326,5518,5520,5683,5684,5685,5687,5689,5694,5700,5701,5702,5704,5705,5706,5708,7280,10197,10383,10540,10844,27229,55559,203068	HSP90AA1,HSP90AB1,PPP2R1A,PPP2R2A,PSMA2,PSMA3,PSMA4,PSMA6,PSMB1,PSMB6,PSMC1,PSMC2,PSMC3,PSMC4,PSMC5,PSMC6,PSMD2,TUBB2A,PSME3,TUBB4B,DCTN2,TUBGCP2,TUBGCP4,HAUS7,TUBB
2_Member	Reactome Gene Sets	R-HSA-453274	Mitotic G2-G2/M phases	-19.4222	-16.2189	25/198	3320,3326,5518,5520,5683,5684,5685,5687,5689,5694,5700,5701,5702,5704,5705,5706,5708,7280,10197,10383,10540,10844,27229,55559,203068	HSP90AA1,HSP90AB1,PPP2R1A,PPP2R2A,PSMA2,PSMA3,PSMA4,PSMA6,PSMB1,PSMB6,PSMC1,PSMC2,PSMC3,PSMC4,PSMC5,PSMC6,PSMD2,TUBB2A,PSME3,TUBB4B,DCTN2,TUBGCP2,TUBGCP4,HAUS7,TUBB
2_Member	Reactome Gene Sets	R-HSA-8852276	The role of GTSE1 in G2/M progression after G2 checkpoint	-19.131	-15.9576	18/77	3320,3326,5683,5684,5685,5687,5689,5694,5700,5701,5702,5704,5705,5706,5708,7280,10197,10383	HSP90AA1,HSP90AB1,PSMA2,PSMA3,PSMA4,PSMA6,PSMB1,PSMB6,PSMC1,PSMC2,PSMC3,PSMC4,PSMC5,PSMC6,PSMD2,TUBB2A,PSME3,TUBB4B
2_Member	Reactome Gene Sets	R-HSA-68949	Orc1 removal from chromatin	-18.291	-15.1456	17/71	4171,4999,5000,5683,5684,5685,5687,5689,5694,5700,5701,5702,5704,5705,5706,5708,10197	MCM2,ORC2,ORC4,PSMA2,PSMA3,PSMA4,PSMA6,PSMB1,PSMB6,PSMC1,PSMC2,PSMC3,PSMC4,PSMC5,PSMC6,PSMD2,PSME3
2_Member	CORUM	CORUM:181	26S proteasome	-18.2508	-15.1318	12/22	5683,5684,5685,5687,5689,5694,5700,5701,5702,5704,5705,5706	PSMA2,PSMA3,PSMA4,PSMA6,PSMB1,PSMB6,PSMC1,PSMC2,PSMC3,PSMC4,PSMC5,PSMC6
2_Member	Reactome Gene Sets	R-HSA-450531	Regulation of mRNA stability by proteins that bind AU-rich elements	-18.0044	-14.9102	18/88	1432,3312,5683,5684,5685,5687,5689,5694,5700,5701,5702,5704,5705,5706,5708,10197,11340,23404	MAPK14,HSPA8,PSMA2,PSMA3,PSMA4,PSMA6,PSMB1,PSMB6,PSMC1,PSMC2,PSMC3,PSMC4,PSMC5,PSMC6,PSMD2,PSME3,EXOSC8,EXOSC2
2_Member	Reactome Gene Sets	R-HSA-69306	DNA Replication	-17.5914	-14.5276	23/188	2237,4171,4999,5000,5111,5425,5683,5684,5685,5687,5689,5694,5700,5701,5702,5704,5705,5706,5708,10197,54107,64785,84296	FEN1,MCM2,ORC2,ORC4,PCNA,POLD2,PSMA2,PSMA3,PSMA4,PSMA6,PSMB1,PSMB6,PSMC1,PSMC2,PSMC3,PSMC4,PSMC5,PSMC6,PSMD2,PSME3,POLE3,GINS3,GINS4
2_Member	Reactome Gene Sets	R-HSA-75815	Ubiquitin-dependent degradation of Cyclin D	-17.5549	-14.5276	15/52	2932,5683,5684,5685,5687,5689,5694,5700,5701,5702,5704,5705,5706,5708,10197	GSK3B,PSMA2,PSMA3,PSMA4,PSMA6,PSMB1,PSMB6,PSMC1,PSMC2,PSMC3,PSMC4,PSMC5,PSMC6,PSMD2,PSME3
2_Member	Reactome Gene Sets	R-HSA-9762114	GSK3B and BTRC:CUL1-mediated-degradation of NFE2L2	-17.5549	-14.5276	15/52	2932,5683,5684,5685,5687,5689,5694,5700,5701,5702,5704,5705,5706,5708,10197	GSK3B,PSMA2,PSMA3,PSMA4,PSMA6,PSMB1,PSMB6,PSMC1,PSMC2,PSMC3,PSMC4,PSMC5,PSMC6,PSMD2,PSME3
2_Member	Reactome Gene Sets	R-HSA-9759194	Nuclear events mediated by NFE2L2	-17.4352	-14.4474	17/79	2932,5683,5684,5685,5687,5689,5694,5700,5701,5702,5704,5705,5706,5708,7296,8878,10197	GSK3B,PSMA2,PSMA3,PSMA4,PSMA6,PSMB1,PSMB6,PSMC1,PSMC2,PSMC3,PSMC4,PSMC5,PSMC6,PSMD2,TXNRD1,SQSTM1,PSME3
2_Member	Reactome Gene Sets	R-HSA-1234176	Oxygen-dependent proline hydroxylation of Hypoxia-inducible Factor Alpha	-17.3411	-14.3719	16/66	5683,5684,5685,5687,5689,5694,5700,5701,5702,5704,5705,5706,5708,7323,10197,54583	PSMA2,PSMA3,PSMA4,PSMA6,PSMB1,PSMB6,PSMC1,PSMC2,PSMC3,PSMC4,PSMC5,PSMC6,PSMD2,UBE2D3,PSME3,EGLN1
2_Member	Reactome Gene Sets	R-HSA-68886	M Phase	-17.1433	-14.2252	31/418	1460,3320,5518,5520,5683,5684,5685,5687,5689,5694,5700,5701,5702,5704,5705,5706,5708,5901,7280,10197,10383,10540,10592,10726,10844,27229,55559,55746,57122,64151,203068	CSNK2B,HSP90AA1,PPP2R1A,PPP2R2A,PSMA2,PSMA3,PSMA4,PSMA6,PSMB1,PSMB6,PSMC1,PSMC2,PSMC3,PSMC4,PSMC5,PSMC6,PSMD2,RAN,TUBB2A,PSME3,TUBB4B,DCTN2,SMC2,NUDC,TUBGCP2,TUBGCP4,HAUS7,NUP133,NUP107,NCAPG,TUBB
2_Member	Reactome Gene Sets	R-HSA-450408	AUF1 (hnRNP D0) binds and destabilizes mRNA	-17.0111	-14.1088	15/56	3312,5683,5684,5685,5687,5689,5694,5700,5701,5702,5704,5705,5706,5708,10197	HSPA8,PSMA2,PSMA3,PSMA4,PSMA6,PSMB1,PSMB6,PSMC1,PSMC2,PSMC3,PSMC4,PSMC5,PSMC6,PSMD2,PSME3
2_Member	KEGG Pathway	hsa03050	Proteasome	-16.7923	-13.9052	14/46	5683,5684,5685,5687,5689,5694,5700,5701,5702,5704,5705,5706,5708,10197	PSMA2,PSMA3,PSMA4,PSMA6,PSMB1,PSMB6,PSMC1,PSMC2,PSMC3,PSMC4,PSMC5,PSMC6,PSMD2,PSME3
2_Member	CORUM	CORUM:193	PA700-20S-PA28 complex	-16.7602	-13.8878	13/36	5683,5684,5685,5687,5689,5694,5700,5701,5702,5704,5705,5706,5708	PSMA2,PSMA3,PSMA4,PSMA6,PSMB1,PSMB6,PSMC1,PSMC2,PSMC3,PSMC4,PSMC5,PSMC6,PSMD2
2_Member	Reactome Gene Sets	R-HSA-8939902	Regulation of RUNX2 expression and activity	-16.579	-13.748	16/73	2932,5683,5684,5685,5687,5689,5694,5700,5701,5702,5704,5705,5706,5708,10197,11059	GSK3B,PSMA2,PSMA3,PSMA4,PSMA6,PSMB1,PSMB6,PSMC1,PSMC2,PSMC3,PSMC4,PSMC5,PSMC6,PSMD2,PSME3,WWP1
2_Member	Reactome Gene Sets	R-HSA-5610783	Degradation of GLI2 by the proteasome	-16.512	-13.7066	15/60	2932,5683,5684,5685,5687,5689,5694,5700,5701,5702,5704,5705,5706,5708,10197	GSK3B,PSMA2,PSMA3,PSMA4,PSMA6,PSMB1,PSMB6,PSMC1,PSMC2,PSMC3,PSMC4,PSMC5,PSMC6,PSMD2,PSME3
2_Member	Reactome Gene Sets	R-HSA-5610785	GLI3 is processed to GLI3R by the proteasome	-16.512	-13.7066	15/60	2932,5683,5684,5685,5687,5689,5694,5700,5701,5702,5704,5705,5706,5708,10197	GSK3B,PSMA2,PSMA3,PSMA4,PSMA6,PSMB1,PSMB6,PSMC1,PSMC2,PSMC3,PSMC4,PSMC5,PSMC6,PSMD2,PSME3
2_Member	Reactome Gene Sets	R-HSA-9755511	KEAP1-NFE2L2 pathway	-16.3983	-13.6052	18/107	1460,2932,5683,5684,5685,5687,5689,5694,5700,5701,5702,5704,5705,5706,5708,7296,8878,10197	CSNK2B,GSK3B,PSMA2,PSMA3,PSMA4,PSMA6,PSMB1,PSMB6,PSMC1,PSMC2,PSMC3,PSMC4,PSMC5,PSMC6,PSMD2,TXNRD1,SQSTM1,PSME3
2_Member	Reactome Gene Sets	R-HSA-1234174	Cellular response to hypoxia	-16.3769	-13.5956	16/75	5683,5684,5685,5687,5689,5694,5700,5701,5702,5704,5705,5706,5708,7323,10197,54583	PSMA2,PSMA3,PSMA4,PSMA6,PSMB1,PSMB6,PSMC1,PSMC2,PSMC3,PSMC4,PSMC5,PSMC6,PSMD2,UBE2D3,PSME3,EGLN1
2_Member	Reactome Gene Sets	R-HSA-1236978	Cross-presentation of soluble exogenous antigens (endosomes)	-16.3546	-13.5849	14/49	5683,5684,5685,5687,5689,5694,5700,5701,5702,5704,5705,5706,5708,10197	PSMA2,PSMA3,PSMA4,PSMA6,PSMB1,PSMB6,PSMC1,PSMC2,PSMC3,PSMC4,PSMC5,PSMC6,PSMD2,PSME3
2_Member	WikiPathways	WP183	Proteasome degradation	-16.277	-13.5186	15/62	5683,5684,5685,5687,5689,5694,5700,5701,5702,5704,5705,5706,5708,7323,10197	PSMA2,PSMA3,PSMA4,PSMA6,PSMB1,PSMB6,PSMC1,PSMC2,PSMC3,PSMC4,PSMC5,PSMC6,PSMD2,UBE2D3,PSME3
2_Member	Reactome Gene Sets	R-HSA-69052	Switching of origins to a post-replicative state	-16.2401	-13.4982	17/92	4171,4999,5000,5683,5684,5685,5687,5689,5694,5700,5701,5702,5704,5705,5706,5708,10197	MCM2,ORC2,ORC4,PSMA2,PSMA3,PSMA4,PSMA6,PSMB1,PSMB6,PSMC1,PSMC2,PSMC3,PSMC4,PSMC5,PSMC6,PSMD2,PSME3
2_Member	Reactome Gene Sets	R-HSA-211733	Regulation of activated PAK-2p34 by proteasome mediated degradation	-16.2159	-13.4982	14/50	5683,5684,5685,5687,5689,5694,5700,5701,5702,5704,5705,5706,5708,10197	PSMA2,PSMA3,PSMA4,PSMA6,PSMB1,PSMB6,PSMC1,PSMC2,PSMC3,PSMC4,PSMC5,PSMC6,PSMD2,PSME3
2_Member	Reactome Gene Sets	R-HSA-2262752	Cellular responses to stress	-16.2142	-13.4982	40/789	440,1432,1460,1915,2197,2475,2932,3301,3312,3320,3326,5683,5684,5685,5687,5689,5694,5700,5701,5702,5704,5705,5706,5708,6222,6223,7266,7280,7296,7323,8878,10197,10383,10540,10808,11340,23404,54583,55746,57122	ASNS,MAPK14,CSNK2B,EEF1A1,FAU,MTOR,GSK3B,DNAJA1,HSPA8,HSP90AA1,HSP90AB1,PSMA2,PSMA3,PSMA4,PSMA6,PSMB1,PSMB6,PSMC1,PSMC2,PSMC3,PSMC4,PSMC5,PSMC6,PSMD2,RPS18,RPS19,DNAJC7,TUBB2A,TXNRD1,UBE2D3,SQSTM1,PSME3,TUBB4B,DCTN2,HSPH1,EXOSC8,EXOSC2,EGLN1,NUP133,NUP107
2_Member	Reactome Gene Sets	R-HSA-350562	Regulation of ornithine decarboxylase (ODC)	-16.0805	-13.3744	14/51	5683,5684,5685,5687,5689,5694,5700,5701,5702,5704,5705,5706,5708,10197	PSMA2,PSMA3,PSMA4,PSMA6,PSMB1,PSMB6,PSMC1,PSMC2,PSMC3,PSMC4,PSMC5,PSMC6,PSMD2,PSME3
2_Member	Reactome Gene Sets	R-HSA-180534	Vpu mediated degradation of CD4	-15.9482	-13.2889	14/52	5683,5684,5685,5687,5689,5694,5700,5701,5702,5704,5705,5706,5708,10197	PSMA2,PSMA3,PSMA4,PSMA6,PSMB1,PSMB6,PSMC1,PSMC2,PSMC3,PSMC4,PSMC5,PSMC6,PSMD2,PSME3
2_Member	Reactome Gene Sets	R-HSA-349425	Autodegradation of the E3 ubiquitin ligase COP1	-15.9482	-13.2889	14/52	5683,5684,5685,5687,5689,5694,5700,5701,5702,5704,5705,5706,5708,10197	PSMA2,PSMA3,PSMA4,PSMA6,PSMB1,PSMB6,PSMC1,PSMC2,PSMC3,PSMC4,PSMC5,PSMC6,PSMD2,PSME3
2_Member	Reactome Gene Sets	R-HSA-69601	Ubiquitin Mediated Degradation of Phosphorylated Cdc25A	-15.9482	-13.2889	14/52	5683,5684,5685,5687,5689,5694,5700,5701,5702,5704,5705,5706,5708,10197	PSMA2,PSMA3,PSMA4,PSMA6,PSMB1,PSMB6,PSMC1,PSMC2,PSMC3,PSMC4,PSMC5,PSMC6,PSMD2,PSME3
2_Member	Reactome Gene Sets	R-HSA-69610	p53-Independent DNA Damage Response	-15.9482	-13.2889	14/52	5683,5684,5685,5687,5689,5694,5700,5701,5702,5704,5705,5706,5708,10197	PSMA2,PSMA3,PSMA4,PSMA6,PSMB1,PSMB6,PSMC1,PSMC2,PSMC3,PSMC4,PSMC5,PSMC6,PSMD2,PSME3
2_Member	Reactome Gene Sets	R-HSA-69613	p53-Independent G1/S DNA damage checkpoint	-15.9482	-13.2889	14/52	5683,5684,5685,5687,5689,5694,5700,5701,5702,5704,5705,5706,5708,10197	PSMA2,PSMA3,PSMA4,PSMA6,PSMB1,PSMB6,PSMC1,PSMC2,PSMC3,PSMC4,PSMC5,PSMC6,PSMD2,PSME3
2_Member	Reactome Gene Sets	R-HSA-169911	Regulation of Apoptosis	-15.8189	-13.177	14/53	5683,5684,5685,5687,5689,5694,5700,5701,5702,5704,5705,5706,5708,10197	PSMA2,PSMA3,PSMA4,PSMA6,PSMB1,PSMB6,PSMC1,PSMC2,PSMC3,PSMC4,PSMC5,PSMC6,PSMD2,PSME3
2_Member	Reactome Gene Sets	R-HSA-5663202	Diseases of signal transduction by growth factor receptors and second messengers	-15.7926	-13.1591	30/433	833,1445,1937,2475,2932,3320,5291,5431,5434,5437,5518,5683,5684,5685,5687,5689,5694,5700,5701,5702,5704,5705,5706,5708,5894,7414,8546,8878,10197,10342	CARS1,CSK,EEF1G,MTOR,GSK3B,HSP90AA1,PIK3CB,POLR2B,POLR2E,POLR2H,PPP2R1A,PSMA2,PSMA3,PSMA4,PSMA6,PSMB1,PSMB6,PSMC1,PSMC2,PSMC3,PSMC4,PSMC5,PSMC6,PSMD2,RAF1,VCL,AP3B1,SQSTM1,PSME3,TFG
2_Member	Reactome Gene Sets	R-HSA-180585	Vif-mediated degradation of APOBEC3G	-15.6925	-13.0834	14/54	5683,5684,5685,5687,5689,5694,5700,5701,5702,5704,5705,5706,5708,10197	PSMA2,PSMA3,PSMA4,PSMA6,PSMB1,PSMB6,PSMC1,PSMC2,PSMC3,PSMC4,PSMC5,PSMC6,PSMD2,PSME3
2_Member	Reactome Gene Sets	R-HSA-8854050	FBXL7 down-regulates AURKA during mitotic entry and in early mitosis	-15.6925	-13.0834	14/54	5683,5684,5685,5687,5689,5694,5700,5701,5702,5704,5705,5706,5708,10197	PSMA2,PSMA3,PSMA4,PSMA6,PSMB1,PSMB6,PSMC1,PSMC2,PSMC3,PSMC4,PSMC5,PSMC6,PSMD2,PSME3
2_Member	Reactome Gene Sets	R-HSA-9604323	Negative regulation of NOTCH4 signaling	-15.6925	-13.0834	14/54	5683,5684,5685,5687,5689,5694,5700,5701,5702,5704,5705,5706,5708,10197	PSMA2,PSMA3,PSMA4,PSMA6,PSMB1,PSMB6,PSMC1,PSMC2,PSMC3,PSMC4,PSMC5,PSMC6,PSMD2,PSME3
2_Member	Reactome Gene Sets	R-HSA-195253	Degradation of beta-catenin by the destruction complex	-15.6269	-13.0256	16/83	2932,5518,5683,5684,5685,5687,5689,5694,5700,5701,5702,5704,5705,5706,5708,10197	GSK3B,PPP2R1A,PSMA2,PSMA3,PSMA4,PSMA6,PSMB1,PSMB6,PSMC1,PSMC2,PSMC3,PSMC4,PSMC5,PSMC6,PSMD2,PSME3
2_Member	Reactome Gene Sets	R-HSA-174113	SCF-beta-TrCP mediated degradation of Emi1	-15.5689	-12.992	14/55	5683,5684,5685,5687,5689,5694,5700,5701,5702,5704,5705,5706,5708,10197	PSMA2,PSMA3,PSMA4,PSMA6,PSMB1,PSMB6,PSMC1,PSMC2,PSMC3,PSMC4,PSMC5,PSMC6,PSMD2,PSME3
2_Member	Reactome Gene Sets	R-HSA-4641257	Degradation of AXIN	-15.5689	-12.992	14/55	5683,5684,5685,5687,5689,5694,5700,5701,5702,5704,5705,5706,5708,10197	PSMA2,PSMA3,PSMA4,PSMA6,PSMB1,PSMB6,PSMC1,PSMC2,PSMC3,PSMC4,PSMC5,PSMC6,PSMD2,PSME3
2_Member	Reactome Gene Sets	R-HSA-8941858	Regulation of RUNX3 expression and activity	-15.5689	-12.992	14/55	5683,5684,5685,5687,5689,5694,5700,5701,5702,5704,5705,5706,5708,10197	PSMA2,PSMA3,PSMA4,PSMA6,PSMB1,PSMB6,PSMC1,PSMC2,PSMC3,PSMC4,PSMC5,PSMC6,PSMD2,PSME3
2_Member	Reactome Gene Sets	R-HSA-71291	Metabolism of amino acids and derivatives	-15.5633	-12.992	28/376	440,1615,2197,2805,5683,5684,5685,5687,5689,5694,5700,5701,5702,5704,5705,5706,5708,5723,5917,6222,6223,6301,7296,9255,9380,10197,29968,57407	ASNS,DARS1,FAU,GOT1,PSMA2,PSMA3,PSMA4,PSMA6,PSMB1,PSMB6,PSMC1,PSMC2,PSMC3,PSMC4,PSMC5,PSMC6,PSMD2,PSPH,RARS1,RPS18,RPS19,SARS1,TXNRD1,AIMP1,GRHPR,PSME3,PSAT1,NMRAL1
2_Member	Reactome Gene Sets	R-HSA-8948751	Regulation of PTEN stability and activity	-15.5199	-12.9557	15/69	1460,5683,5684,5685,5687,5689,5694,5700,5701,5702,5704,5705,5706,5708,10197	CSNK2B,PSMA2,PSMA3,PSMA4,PSMA6,PSMB1,PSMB6,PSMC1,PSMC2,PSMC3,PSMC4,PSMC5,PSMC6,PSMD2,PSME3
2_Member	Reactome Gene Sets	R-HSA-5362768	Hh mutants are degraded by ERAD	-15.4479	-12.8965	14/56	5683,5684,5685,5687,5689,5694,5700,5701,5702,5704,5705,5706,5708,10197	PSMA2,PSMA3,PSMA4,PSMA6,PSMB1,PSMB6,PSMC1,PSMC2,PSMC3,PSMC4,PSMC5,PSMC6,PSMD2,PSME3
2_Member	Reactome Gene Sets	R-HSA-5689603	UCH proteinases	-15.4466	-12.8965	17/102	86,5683,5684,5685,5687,5689,5694,5700,5701,5702,5704,5705,5706,5708,8473,9958,10197	ACTL6A,PSMA2,PSMA3,PSMA4,PSMA6,PSMB1,PSMB6,PSMC1,PSMC2,PSMC3,PSMC4,PSMC5,PSMC6,PSMD2,OGT,USP15,PSME3
2_Member	WikiPathways	WP5124	Alzheimer's disease	-15.3764	-12.8398	24/263	836,1460,2475,2932,5291,5481,5683,5684,5685,5687,5689,5694,5700,5701,5702,5704,5705,5706,5708,5894,7280,8772,10383,203068	CASP3,CSNK2B,MTOR,GSK3B,PIK3CB,PPID,PSMA2,PSMA3,PSMA4,PSMA6,PSMB1,PSMB6,PSMC1,PSMC2,PSMC3,PSMC4,PSMC5,PSMC6,PSMD2,RAF1,TUBB2A,FADD,TUBB4B,TUBB
2_Member	Reactome Gene Sets	R-HSA-4641258	Degradation of DVL	-15.3294	-12.8124	14/57	5683,5684,5685,5687,5689,5694,5700,5701,5702,5704,5705,5706,5708,10197	PSMA2,PSMA3,PSMA4,PSMA6,PSMB1,PSMB6,PSMC1,PSMC2,PSMC3,PSMC4,PSMC5,PSMC6,PSMD2,PSME3
2_Member	Reactome Gene Sets	R-HSA-69541	Stabilization of p53	-15.3294	-12.8124	14/57	5683,5684,5685,5687,5689,5694,5700,5701,5702,5704,5705,5706,5708,10197	PSMA2,PSMA3,PSMA4,PSMA6,PSMB1,PSMB6,PSMC1,PSMC2,PSMC3,PSMC4,PSMC5,PSMC6,PSMD2,PSME3
2_Member	Reactome Gene Sets	R-HSA-351202	Metabolism of polyamines	-15.0997	-12.6015	14/59	5683,5684,5685,5687,5689,5694,5700,5701,5702,5704,5705,5706,5708,10197	PSMA2,PSMA3,PSMA4,PSMA6,PSMB1,PSMB6,PSMC1,PSMC2,PSMC3,PSMC4,PSMC5,PSMC6,PSMD2,PSME3
2_Member	Reactome Gene Sets	R-HSA-5387390	Hh mutants abrogate ligand secretion	-15.0997	-12.6015	14/59	5683,5684,5685,5687,5689,5694,5700,5701,5702,5704,5705,5706,5708,10197	PSMA2,PSMA3,PSMA4,PSMA6,PSMB1,PSMB6,PSMC1,PSMC2,PSMC3,PSMC4,PSMC5,PSMC6,PSMD2,PSME3
2_Member	Reactome Gene Sets	R-HSA-5676590	NIK-->noncanonical NF-kB signaling	-15.0997	-12.6015	14/59	5683,5684,5685,5687,5689,5694,5700,5701,5702,5704,5705,5706,5708,10197	PSMA2,PSMA3,PSMA4,PSMA6,PSMB1,PSMB6,PSMC1,PSMC2,PSMC3,PSMC4,PSMC5,PSMC6,PSMD2,PSME3
2_Member	Reactome Gene Sets	R-HSA-187577	SCF(Skp2)-mediated degradation of p27/p21	-14.9882	-12.508	14/60	5683,5684,5685,5687,5689,5694,5700,5701,5702,5704,5705,5706,5708,10197	PSMA2,PSMA3,PSMA4,PSMA6,PSMB1,PSMB6,PSMC1,PSMC2,PSMC3,PSMC4,PSMC5,PSMC6,PSMD2,PSME3
2_Member	Reactome Gene Sets	R-HSA-5607761	Dectin-1 mediated noncanonical NF-kB signaling	-14.9882	-12.508	14/60	5683,5684,5685,5687,5689,5694,5700,5701,5702,5704,5705,5706,5708,10197	PSMA2,PSMA3,PSMA4,PSMA6,PSMB1,PSMB6,PSMC1,PSMC2,PSMC3,PSMC4,PSMC5,PSMC6,PSMD2,PSME3
2_Member	Reactome Gene Sets	R-HSA-5610780	Degradation of GLI1 by the proteasome	-14.9882	-12.508	14/60	5683,5684,5685,5687,5689,5694,5700,5701,5702,5704,5705,5706,5708,10197	PSMA2,PSMA3,PSMA4,PSMA6,PSMB1,PSMB6,PSMC1,PSMC2,PSMC3,PSMC4,PSMC5,PSMC6,PSMD2,PSME3
2_Member	Reactome Gene Sets	R-HSA-9010553	Regulation of expression of SLITs and ROBOs	-14.9272	-12.4528	20/172	2107,2197,2935,5683,5684,5685,5687,5689,5694,5700,5701,5702,5704,5705,5706,5708,6222,6223,10197,23708	ETF1,FAU,GSPT1,PSMA2,PSMA3,PSMA4,PSMA6,PSMB1,PSMB6,PSMC1,PSMC2,PSMC3,PSMC4,PSMC5,PSMC6,PSMD2,RPS18,RPS19,PSME3,GSPT2
2_Member	Reactome Gene Sets	R-HSA-5678895	Defective CFTR causes cystic fibrosis	-14.8789	-12.4103	14/61	5683,5684,5685,5687,5689,5694,5700,5701,5702,5704,5705,5706,5708,10197	PSMA2,PSMA3,PSMA4,PSMA6,PSMB1,PSMB6,PSMC1,PSMC2,PSMC3,PSMC4,PSMC5,PSMC6,PSMD2,PSME3
2_Member	Reactome Gene Sets	R-HSA-5610787	Hedgehog 'off' state	-14.671	-12.208	17/113	2932,5683,5684,5685,5687,5689,5694,5700,5701,5702,5704,5705,5706,5708,7280,10197,10383	GSK3B,PSMA2,PSMA3,PSMA4,PSMA6,PSMB1,PSMB6,PSMC1,PSMC2,PSMC3,PSMC4,PSMC5,PSMC6,PSMD2,TUBB2A,PSME3,TUBB4B
2_Member	Reactome Gene Sets	R-HSA-174084	Autodegradation of Cdh1 by Cdh1:APC/C	-14.5632	-12.1114	14/64	5683,5684,5685,5687,5689,5694,5700,5701,5702,5704,5705,5706,5708,10197	PSMA2,PSMA3,PSMA4,PSMA6,PSMB1,PSMB6,PSMC1,PSMC2,PSMC3,PSMC4,PSMC5,PSMC6,PSMD2,PSME3
2_Member	Reactome Gene Sets	R-HSA-4608870	Asymmetric localization of PCP proteins	-14.5632	-12.1114	14/64	5683,5684,5685,5687,5689,5694,5700,5701,5702,5704,5705,5706,5708,10197	PSMA2,PSMA3,PSMA4,PSMA6,PSMB1,PSMB6,PSMC1,PSMC2,PSMC3,PSMC4,PSMC5,PSMC6,PSMD2,PSME3
2_Member	Reactome Gene Sets	R-HSA-9020702	Interleukin-1 signaling	-14.5393	-12.0929	17/115	5683,5684,5685,5687,5689,5694,5700,5701,5702,5704,5705,5706,5708,7335,8878,9097,10197	PSMA2,PSMA3,PSMA4,PSMA6,PSMB1,PSMB6,PSMC1,PSMC2,PSMC3,PSMC4,PSMC5,PSMC6,PSMD2,UBE2V1,SQSTM1,USP14,PSME3
2_Member	Reactome Gene Sets	R-HSA-5358346	Hedgehog ligand biogenesis	-14.4618	-12.0262	14/65	5683,5684,5685,5687,5689,5694,5700,5701,5702,5704,5705,5706,5708,10197	PSMA2,PSMA3,PSMA4,PSMA6,PSMB1,PSMB6,PSMC1,PSMC2,PSMC3,PSMC4,PSMC5,PSMC6,PSMD2,PSME3
2_Member	Reactome Gene Sets	R-HSA-202424	Downstream TCR signaling	-14.4229	-11.9925	16/98	5291,5683,5684,5685,5687,5689,5694,5700,5701,5702,5704,5705,5706,5708,7335,10197	PIK3CB,PSMA2,PSMA3,PSMA4,PSMA6,PSMB1,PSMB6,PSMC1,PSMC2,PSMC3,PSMC4,PSMC5,PSMC6,PSMD2,UBE2V1,PSME3
2_Member	Reactome Gene Sets	R-HSA-69563	p53-Dependent G1 DNA Damage Response	-14.3622	-11.9422	14/66	5683,5684,5685,5687,5689,5694,5700,5701,5702,5704,5705,5706,5708,10197	PSMA2,PSMA3,PSMA4,PSMA6,PSMB1,PSMB6,PSMC1,PSMC2,PSMC3,PSMC4,PSMC5,PSMC6,PSMD2,PSME3
2_Member	Reactome Gene Sets	R-HSA-69580	p53-Dependent G1/S DNA damage checkpoint	-14.3622	-11.9422	14/66	5683,5684,5685,5687,5689,5694,5700,5701,5702,5704,5705,5706,5708,10197	PSMA2,PSMA3,PSMA4,PSMA6,PSMB1,PSMB6,PSMC1,PSMC2,PSMC3,PSMC4,PSMC5,PSMC6,PSMD2,PSME3
2_Member	Reactome Gene Sets	R-HSA-68882	Mitotic Anaphase	-14.3285	-11.9161	22/236	5518,5520,5683,5684,5685,5687,5689,5694,5700,5701,5702,5704,5705,5706,5708,5901,7280,10197,10383,10726,55746,57122	PPP2R1A,PPP2R2A,PSMA2,PSMA3,PSMA4,PSMA6,PSMB1,PSMB6,PSMC1,PSMC2,PSMC3,PSMC4,PSMC5,PSMC6,PSMD2,RAN,TUBB2A,PSME3,TUBB4B,NUDC,NUP133,NUP107
2_Member	Reactome Gene Sets	R-HSA-2871837	FCERI mediated NF-kB activation	-14.326	-11.9161	15/82	5683,5684,5685,5687,5689,5694,5700,5701,5702,5704,5705,5706,5708,7335,10197	PSMA2,PSMA3,PSMA4,PSMA6,PSMB1,PSMB6,PSMC1,PSMC2,PSMC3,PSMC4,PSMC5,PSMC6,PSMD2,UBE2V1,PSME3
2_Member	Reactome Gene Sets	R-HSA-2555396	Mitotic Metaphase and Anaphase	-14.2901	-11.8852	22/237	5518,5520,5683,5684,5685,5687,5689,5694,5700,5701,5702,5704,5705,5706,5708,5901,7280,10197,10383,10726,55746,57122	PPP2R1A,PPP2R2A,PSMA2,PSMA3,PSMA4,PSMA6,PSMB1,PSMB6,PSMC1,PSMC2,PSMC3,PSMC4,PSMC5,PSMC6,PSMD2,RAN,TUBB2A,PSME3,TUBB4B,NUDC,NUP133,NUP107
2_Member	Reactome Gene Sets	R-HSA-1169091	Activation of NF-kappaB in B cells	-14.2644	-11.8643	14/67	5683,5684,5685,5687,5689,5694,5700,5701,5702,5704,5705,5706,5708,10197	PSMA2,PSMA3,PSMA4,PSMA6,PSMB1,PSMB6,PSMC1,PSMC2,PSMC3,PSMC4,PSMC5,PSMC6,PSMD2,PSME3
2_Member	Reactome Gene Sets	R-HSA-202403	TCR signaling	-14.2212	-11.8259	17/120	1445,5291,5683,5684,5685,5687,5689,5694,5700,5701,5702,5704,5705,5706,5708,7335,10197	CSK,PIK3CB,PSMA2,PSMA3,PSMA4,PSMA6,PSMB1,PSMB6,PSMC1,PSMC2,PSMC3,PSMC4,PSMC5,PSMC6,PSMD2,UBE2V1,PSME3
2_Member	Reactome Gene Sets	R-HSA-5607764	CLEC7A (Dectin-1) signaling	-14.2076	-11.8171	16/101	5683,5684,5685,5687,5689,5694,5700,5701,5702,5704,5705,5706,5708,7335,10197,10768	PSMA2,PSMA3,PSMA4,PSMA6,PSMB1,PSMB6,PSMC1,PSMC2,PSMC3,PSMC4,PSMC5,PSMC6,PSMD2,UBE2V1,PSME3,AHCYL1
2_Member	Reactome Gene Sets	R-HSA-174154	APC/C:Cdc20 mediated degradation of Securin	-14.1682	-11.7918	14/68	5683,5684,5685,5687,5689,5694,5700,5701,5702,5704,5705,5706,5708,10197	PSMA2,PSMA3,PSMA4,PSMA6,PSMB1,PSMB6,PSMC1,PSMC2,PSMC3,PSMC4,PSMC5,PSMC6,PSMD2,PSME3
2_Member	Reactome Gene Sets	R-HSA-5658442	Regulation of RAS by GAPs	-14.1682	-11.7918	14/68	5683,5684,5685,5687,5689,5694,5700,5701,5702,5704,5705,5706,5708,10197	PSMA2,PSMA3,PSMA4,PSMA6,PSMB1,PSMB6,PSMC1,PSMC2,PSMC3,PSMC4,PSMC5,PSMC6,PSMD2,PSME3
2_Member	Reactome Gene Sets	R-HSA-69615	G1/S DNA Damage Checkpoints	-14.1682	-11.7918	14/68	5683,5684,5685,5687,5689,5694,5700,5701,5702,5704,5705,5706,5708,10197	PSMA2,PSMA3,PSMA4,PSMA6,PSMB1,PSMB6,PSMC1,PSMC2,PSMC3,PSMC4,PSMC5,PSMC6,PSMD2,PSME3
2_Member	Reactome Gene Sets	R-HSA-2467813	Separation of Sister Chromatids	-14.0406	-11.6689	20/191	5518,5683,5684,5685,5687,5689,5694,5700,5701,5702,5704,5705,5706,5708,7280,10197,10383,10726,55746,57122	PPP2R1A,PSMA2,PSMA3,PSMA4,PSMA6,PSMB1,PSMB6,PSMC1,PSMC2,PSMC3,PSMC4,PSMC5,PSMC6,PSMD2,TUBB2A,PSME3,TUBB4B,NUDC,NUP133,NUP107
2_Member	Reactome Gene Sets	R-HSA-174184	Cdc20:Phospho-APC/C mediated degradation of Cyclin A	-13.7107	-11.348	14/73	5683,5684,5685,5687,5689,5694,5700,5701,5702,5704,5705,5706,5708,10197	PSMA2,PSMA3,PSMA4,PSMA6,PSMB1,PSMB6,PSMC1,PSMC2,PSMC3,PSMC4,PSMC5,PSMC6,PSMD2,PSME3
2_Member	Reactome Gene Sets	R-HSA-69017	CDK-mediated phosphorylation and removal of Cdc6	-13.7107	-11.348	14/73	5683,5684,5685,5687,5689,5694,5700,5701,5702,5704,5705,5706,5708,10197	PSMA2,PSMA3,PSMA4,PSMA6,PSMB1,PSMB6,PSMC1,PSMC2,PSMC3,PSMC4,PSMC5,PSMC6,PSMD2,PSME3
2_Member	Reactome Gene Sets	R-HSA-162909	Host Interactions of HIV factors	-13.6281	-11.2741	17/130	5683,5684,5685,5687,5689,5694,5700,5701,5702,5704,5705,5706,5708,5901,10197,55746,57122	PSMA2,PSMA3,PSMA4,PSMA6,PSMB1,PSMB6,PSMC1,PSMC2,PSMC3,PSMC4,PSMC5,PSMC6,PSMD2,RAN,PSME3,NUP133,NUP107
2_Member	Reactome Gene Sets	R-HSA-174178	APC/C:Cdh1 mediated degradation of Cdc20 and other APC/C:Cdh1 targeted proteins in late mitosis/early G1	-13.6236	-11.2741	14/74	5683,5684,5685,5687,5689,5694,5700,5701,5702,5704,5705,5706,5708,10197	PSMA2,PSMA3,PSMA4,PSMA6,PSMB1,PSMB6,PSMC1,PSMC2,PSMC3,PSMC4,PSMC5,PSMC6,PSMD2,PSME3
2_Member	Reactome Gene Sets	R-HSA-179419	APC:Cdc20 mediated degradation of cell cycle proteins prior to satisfation of the cell cycle checkpoint	-13.6236	-11.2741	14/74	5683,5684,5685,5687,5689,5694,5700,5701,5702,5704,5705,5706,5708,10197	PSMA2,PSMA3,PSMA4,PSMA6,PSMB1,PSMB6,PSMC1,PSMC2,PSMC3,PSMC4,PSMC5,PSMC6,PSMD2,PSME3
2_Member	Reactome Gene Sets	R-HSA-162906	HIV Infection	-13.4834	-11.1382	21/231	2237,5431,5434,5437,5683,5684,5685,5687,5689,5694,5700,5701,5702,5704,5705,5706,5708,5901,10197,55746,57122	FEN1,POLR2B,POLR2E,POLR2H,PSMA2,PSMA3,PSMA4,PSMA6,PSMB1,PSMB6,PSMC1,PSMC2,PSMC3,PSMC4,PSMC5,PSMC6,PSMD2,RAN,PSME3,NUP133,NUP107
2_Member	Reactome Gene Sets	R-HSA-176409	APC/C:Cdc20 mediated degradation of mitotic proteins	-13.4533	-11.1124	14/76	5683,5684,5685,5687,5689,5694,5700,5701,5702,5704,5705,5706,5708,10197	PSMA2,PSMA3,PSMA4,PSMA6,PSMB1,PSMB6,PSMC1,PSMC2,PSMC3,PSMC4,PSMC5,PSMC6,PSMD2,PSME3
2_Member	Reactome Gene Sets	R-HSA-2454202	Fc epsilon receptor (FCERI) signaling	-13.4054	-11.0725	17/134	5291,5683,5684,5685,5687,5689,5694,5700,5701,5702,5704,5705,5706,5708,7335,10197,10768	PIK3CB,PSMA2,PSMA3,PSMA4,PSMA6,PSMB1,PSMB6,PSMC1,PSMC2,PSMC3,PSMC4,PSMC5,PSMC6,PSMD2,UBE2V1,PSME3,AHCYL1
2_Member	Reactome Gene Sets	R-HSA-176814	Activation of APC/C and APC/C:Cdc20 mediated degradation of mitotic proteins	-13.3701	-11.0418	14/77	5683,5684,5685,5687,5689,5694,5700,5701,5702,5704,5705,5706,5708,10197	PSMA2,PSMA3,PSMA4,PSMA6,PSMB1,PSMB6,PSMC1,PSMC2,PSMC3,PSMC4,PSMC5,PSMC6,PSMD2,PSME3
2_Member	Reactome Gene Sets	R-HSA-5619084	ABC transporter disorders	-13.2881	-10.964	14/78	5683,5684,5685,5687,5689,5694,5700,5701,5702,5704,5705,5706,5708,10197	PSMA2,PSMA3,PSMA4,PSMA6,PSMB1,PSMB6,PSMC1,PSMC2,PSMC3,PSMC4,PSMC5,PSMC6,PSMD2,PSME3
2_Member	Reactome Gene Sets	R-HSA-69002	DNA Replication Pre-Initiation	-13.2357	-10.9184	18/160	4171,4999,5000,5683,5684,5685,5687,5689,5694,5700,5701,5702,5704,5705,5706,5708,10197,54107	MCM2,ORC2,ORC4,PSMA2,PSMA3,PSMA4,PSMA6,PSMB1,PSMB6,PSMC1,PSMC2,PSMC3,PSMC4,PSMC5,PSMC6,PSMD2,PSME3,POLE3
2_Member	WikiPathways	WP2059	Alzheimer's disease and miRNA effects	-13.2345	-10.9184	24/328	836,1460,2475,2932,5291,5481,5683,5684,5685,5687,5689,5694,5700,5701,5702,5704,5705,5706,5708,5894,7280,8772,10383,203068	CASP3,CSNK2B,MTOR,GSK3B,PIK3CB,PPID,PSMA2,PSMA3,PSMA4,PSMA6,PSMB1,PSMB6,PSMC1,PSMC2,PSMC3,PSMC4,PSMC5,PSMC6,PSMD2,RAF1,TUBB2A,FADD,TUBB4B,TUBB
2_Member	Reactome Gene Sets	R-HSA-176408	Regulation of APC/C activators between G1/S and early anaphase	-13.0493	-10.7372	14/81	5683,5684,5685,5687,5689,5694,5700,5701,5702,5704,5705,5706,5708,10197	PSMA2,PSMA3,PSMA4,PSMA6,PSMB1,PSMB6,PSMC1,PSMC2,PSMC3,PSMC4,PSMC5,PSMC6,PSMD2,PSME3
2_Member	KEGG Pathway	hsa05020	Prion disease	-13.0217	-10.7136	22/273	836,1432,1460,2932,3312,5291,5683,5684,5685,5687,5689,5694,5700,5701,5702,5704,5705,5706,5708,7280,10383,203068	CASP3,MAPK14,CSNK2B,GSK3B,HSPA8,PIK3CB,PSMA2,PSMA3,PSMA4,PSMA6,PSMB1,PSMB6,PSMC1,PSMC2,PSMC3,PSMC4,PSMC5,PSMC6,PSMD2,TUBB2A,TUBB4B,TUBB
2_Member	Reactome Gene Sets	R-HSA-5621481	C-type lectin receptors (CLRs)	-12.9818	-10.6777	17/142	5683,5684,5685,5687,5689,5694,5700,5701,5702,5704,5705,5706,5708,5894,7335,10197,10768	PSMA2,PSMA3,PSMA4,PSMA6,PSMB1,PSMB6,PSMC1,PSMC2,PSMC3,PSMC4,PSMC5,PSMC6,PSMD2,RAF1,UBE2V1,PSME3,AHCYL1
2_Member	Reactome Gene Sets	R-HSA-422475	Axon guidance	-12.9751	-10.6755	30/553	1432,1460,2107,2197,2932,2935,3312,3320,3326,5291,5683,5684,5685,5687,5689,5694,5700,5701,5702,5704,5705,5706,5708,6222,6223,7280,9475,10197,10383,23708	MAPK14,CSNK2B,ETF1,FAU,GSK3B,GSPT1,HSPA8,HSP90AA1,HSP90AB1,PIK3CB,PSMA2,PSMA3,PSMA4,PSMA6,PSMB1,PSMB6,PSMC1,PSMC2,PSMC3,PSMC4,PSMC5,PSMC6,PSMD2,RPS18,RPS19,TUBB2A,ROCK2,PSME3,TUBB4B,GSPT2
2_Member	Reactome Gene Sets	R-HSA-9013694	Signaling by NOTCH4	-12.9719	-10.6755	14/82	5683,5684,5685,5687,5689,5694,5700,5701,5702,5704,5705,5706,5708,10197	PSMA2,PSMA3,PSMA4,PSMA6,PSMB1,PSMB6,PSMC1,PSMC2,PSMC3,PSMC4,PSMC5,PSMC6,PSMD2,PSME3
2_Member	KEGG Pathway	hsa05016	Huntington disease	-12.9489	-10.6563	23/306	836,2475,5431,5434,5437,5683,5684,5685,5687,5689,5694,5700,5701,5702,5704,5705,5706,5708,7280,10383,10540,201625,203068	CASP3,MTOR,POLR2B,POLR2E,POLR2H,PSMA2,PSMA3,PSMA4,PSMA6,PSMB1,PSMB6,PSMC1,PSMC2,PSMC3,PSMC4,PSMC5,PSMC6,PSMD2,TUBB2A,TUBB4B,DCTN2,DNAH12,TUBB
2_Member	Reactome Gene Sets	R-HSA-8878166	Transcriptional regulation by RUNX2	-12.9368	-10.6495	16/121	2932,5683,5684,5685,5687,5689,5694,5700,5701,5702,5704,5705,5706,5708,10197,11059	GSK3B,PSMA2,PSMA3,PSMA4,PSMA6,PSMB1,PSMB6,PSMC1,PSMC2,PSMC3,PSMC4,PSMC5,PSMC6,PSMD2,PSME3,WWP1
2_Member	Reactome Gene Sets	R-HSA-68867	Assembly of the pre-replicative complex	-12.9308	-10.6495	17/143	4171,4999,5000,5683,5684,5685,5687,5689,5694,5700,5701,5702,5704,5705,5706,5708,10197	MCM2,ORC2,ORC4,PSMA2,PSMA3,PSMA4,PSMA6,PSMB1,PSMB6,PSMC1,PSMC2,PSMC3,PSMC4,PSMC5,PSMC6,PSMD2,PSME3
2_Member	KEGG Pathway	hsa05017	Spinocerebellar ataxia	-12.9308	-10.6495	17/143	2475,5291,5683,5684,5685,5687,5689,5694,5700,5701,5702,5704,5705,5706,5708,10528,25814	MTOR,PIK3CB,PSMA2,PSMA3,PSMA4,PSMA6,PSMB1,PSMB6,PSMC1,PSMC2,PSMC3,PSMC4,PSMC5,PSMC6,PSMD2,NOP56,ATXN10
2_Member	Reactome Gene Sets	R-HSA-376176	Signaling by ROBO receptors	-12.9039	-10.6263	20/219	2107,2197,2935,5683,5684,5685,5687,5689,5694,5700,5701,5702,5704,5705,5706,5708,6222,6223,10197,23708	ETF1,FAU,GSPT1,PSMA2,PSMA3,PSMA4,PSMA6,PSMB1,PSMB6,PSMC1,PSMC2,PSMC3,PSMC4,PSMC5,PSMC6,PSMD2,RPS18,RPS19,PSME3,GSPT2
2_Member	Reactome Gene Sets	R-HSA-1168372	Downstream signaling events of B Cell Receptor (BCR)	-12.8956	-10.6253	14/83	5683,5684,5685,5687,5689,5694,5700,5701,5702,5704,5705,5706,5708,10197	PSMA2,PSMA3,PSMA4,PSMA6,PSMB1,PSMB6,PSMC1,PSMC2,PSMC3,PSMC4,PSMC5,PSMC6,PSMD2,PSME3
2_Member	Reactome Gene Sets	R-HSA-69202	Cyclin E associated events during G1/S transition	-12.8956	-10.6253	14/83	5683,5684,5685,5687,5689,5694,5700,5701,5702,5704,5705,5706,5708,10197	PSMA2,PSMA3,PSMA4,PSMA6,PSMB1,PSMB6,PSMC1,PSMC2,PSMC3,PSMC4,PSMC5,PSMC6,PSMD2,PSME3
2_Member	Reactome Gene Sets	R-HSA-5632684	Hedgehog 'on' state	-12.7461	-10.483	14/85	5683,5684,5685,5687,5689,5694,5700,5701,5702,5704,5705,5706,5708,10197	PSMA2,PSMA3,PSMA4,PSMA6,PSMB1,PSMB6,PSMC1,PSMC2,PSMC3,PSMC4,PSMC5,PSMC6,PSMD2,PSME3
2_Member	Reactome Gene Sets	R-HSA-69656	Cyclin A:Cdk2-associated events at S phase entry	-12.7461	-10.483	14/85	5683,5684,5685,5687,5689,5694,5700,5701,5702,5704,5705,5706,5708,10197	PSMA2,PSMA3,PSMA4,PSMA6,PSMB1,PSMB6,PSMC1,PSMC2,PSMC3,PSMC4,PSMC5,PSMC6,PSMD2,PSME3
2_Member	Reactome Gene Sets	R-HSA-1236975	Antigen processing-Cross presentation	-12.6698	-10.4102	15/105	3693,5683,5684,5685,5687,5689,5694,5700,5701,5702,5704,5705,5706,5708,10197	ITGB5,PSMA2,PSMA3,PSMA4,PSMA6,PSMB1,PSMB6,PSMC1,PSMC2,PSMC3,PSMC4,PSMC5,PSMC6,PSMD2,PSME3
2_Member	Reactome Gene Sets	R-HSA-5358351	Signaling by Hedgehog	-12.633	-10.377	17/149	2932,5683,5684,5685,5687,5689,5694,5700,5701,5702,5704,5705,5706,5708,7280,10197,10383	GSK3B,PSMA2,PSMA3,PSMA4,PSMA6,PSMB1,PSMB6,PSMC1,PSMC2,PSMC3,PSMC4,PSMC5,PSMC6,PSMD2,TUBB2A,PSME3,TUBB4B
2_Member	Reactome Gene Sets	R-HSA-174143	APC/C-mediated degradation of cell cycle proteins	-12.5293	-10.2837	14/88	5683,5684,5685,5687,5689,5694,5700,5701,5702,5704,5705,5706,5708,10197	PSMA2,PSMA3,PSMA4,PSMA6,PSMB1,PSMB6,PSMC1,PSMC2,PSMC3,PSMC4,PSMC5,PSMC6,PSMD2,PSME3
2_Member	Reactome Gene Sets	R-HSA-453276	Regulation of mitotic cell cycle	-12.5293	-10.2837	14/88	5683,5684,5685,5687,5689,5694,5700,5701,5702,5704,5705,5706,5708,10197	PSMA2,PSMA3,PSMA4,PSMA6,PSMB1,PSMB6,PSMC1,PSMC2,PSMC3,PSMC4,PSMC5,PSMC6,PSMD2,PSME3
2_Member	Reactome Gene Sets	R-HSA-9675108	Nervous system development	-12.4815	-10.2392	30/578	1432,1460,2107,2197,2932,2935,3312,3320,3326,5291,5683,5684,5685,5687,5689,5694,5700,5701,5702,5704,5705,5706,5708,6222,6223,7280,9475,10197,10383,23708	MAPK14,CSNK2B,ETF1,FAU,GSK3B,GSPT1,HSPA8,HSP90AA1,HSP90AB1,PIK3CB,PSMA2,PSMA3,PSMA4,PSMA6,PSMB1,PSMB6,PSMC1,PSMC2,PSMC3,PSMC4,PSMC5,PSMC6,PSMD2,RPS18,RPS19,TUBB2A,ROCK2,PSME3,TUBB4B,GSPT2
2_Member	Reactome Gene Sets	R-HSA-5687128	MAPK6/MAPK4 signaling	-12.459	-10.2201	14/89	5683,5684,5685,5687,5689,5694,5700,5701,5702,5704,5705,5706,5708,10197	PSMA2,PSMA3,PSMA4,PSMA6,PSMB1,PSMB6,PSMC1,PSMC2,PSMC3,PSMC4,PSMC5,PSMC6,PSMD2,PSME3
2_Member	Reactome Gene Sets	R-HSA-446652	Interleukin-1 family signaling	-12.442	-10.2065	17/153	5683,5684,5685,5687,5689,5694,5700,5701,5702,5704,5705,5706,5708,7335,8878,9097,10197	PSMA2,PSMA3,PSMA4,PSMA6,PSMB1,PSMB6,PSMC1,PSMC2,PSMC3,PSMC4,PSMC5,PSMC6,PSMD2,UBE2V1,SQSTM1,USP14,PSME3
2_Member	Reactome Gene Sets	R-HSA-1236974	ER-Phagosome pathway	-12.3895	-10.1573	14/90	5683,5684,5685,5687,5689,5694,5700,5701,5702,5704,5705,5706,5708,10197	PSMA2,PSMA3,PSMA4,PSMA6,PSMB1,PSMB6,PSMC1,PSMC2,PSMC3,PSMC4,PSMC5,PSMC6,PSMD2,PSME3
2_Member	Reactome Gene Sets	R-HSA-4086400	PCP/CE pathway	-12.2531	-10.0305	14/92	5683,5684,5685,5687,5689,5694,5700,5701,5702,5704,5705,5706,5708,10197	PSMA2,PSMA3,PSMA4,PSMA6,PSMB1,PSMB6,PSMC1,PSMC2,PSMC3,PSMC4,PSMC5,PSMC6,PSMD2,PSME3
2_Member	KEGG Pathway	hsa05014	Amyotrophic lateral sclerosis	-12.2529	-10.0305	24/364	836,1432,2475,5683,5684,5685,5687,5689,5694,5700,5701,5702,5704,5705,5706,5708,7280,8878,10383,10540,55746,57122,201625,203068	CASP3,MAPK14,MTOR,PSMA2,PSMA3,PSMA4,PSMA6,PSMB1,PSMB6,PSMC1,PSMC2,PSMC3,PSMC4,PSMC5,PSMC6,PSMD2,TUBB2A,SQSTM1,TUBB4B,DCTN2,NUP133,NUP107,DNAH12,TUBB
2_Member	Reactome Gene Sets	R-HSA-983705	Signaling by the B Cell Receptor (BCR)	-12.2471	-10.028	15/112	5683,5684,5685,5687,5689,5694,5700,5701,5702,5704,5705,5706,5708,10197,10768	PSMA2,PSMA3,PSMA4,PSMA6,PSMB1,PSMB6,PSMC1,PSMC2,PSMC3,PSMC4,PSMC5,PSMC6,PSMD2,PSME3,AHCYL1
2_Member	KEGG Pathway	hsa05022	Pathways of neurodegeneration - multiple diseases	-12.17	-9.96038	27/476	836,1432,1460,2475,2932,5481,5683,5684,5685,5687,5689,5694,5700,5701,5702,5704,5705,5706,5708,5894,7280,8772,8878,10383,10540,201625,203068	CASP3,MAPK14,CSNK2B,MTOR,GSK3B,PPID,PSMA2,PSMA3,PSMA4,PSMA6,PSMB1,PSMB6,PSMC1,PSMC2,PSMC3,PSMC4,PSMC5,PSMC6,PSMD2,RAF1,TUBB2A,FADD,SQSTM1,TUBB4B,DCTN2,DNAH12,TUBB
2_Member	Reactome Gene Sets	R-HSA-5357801	Programmed Cell Death	-12.1025	-9.89601	19/213	836,3320,5683,5684,5685,5687,5689,5694,5700,5701,5702,5704,5705,5706,5708,8473,8772,10197,28988	CASP3,HSP90AA1,PSMA2,PSMA3,PSMA4,PSMA6,PSMB1,PSMB6,PSMC1,PSMC2,PSMC3,PSMC4,PSMC5,PSMC6,PSMD2,OGT,FADD,PSME3,DBNL
2_Member	Reactome Gene Sets	R-HSA-8878159	Transcriptional regulation by RUNX3	-11.9903	-9.79307	14/96	5683,5684,5685,5687,5689,5694,5700,5701,5702,5704,5705,5706,5708,10197	PSMA2,PSMA3,PSMA4,PSMA6,PSMB1,PSMB6,PSMC1,PSMC2,PSMC3,PSMC4,PSMC5,PSMC6,PSMD2,PSME3
2_Member	Reactome Gene Sets	R-HSA-6807070	PTEN Regulation	-11.9348	-9.74062	16/140	1460,2475,5683,5684,5685,5687,5689,5694,5700,5701,5702,5704,5705,5706,5708,10197	CSNK2B,MTOR,PSMA2,PSMA3,PSMA4,PSMA6,PSMB1,PSMB6,PSMC1,PSMC2,PSMC3,PSMC4,PSMC5,PSMC6,PSMD2,PSME3
2_Member	Reactome Gene Sets	R-HSA-69481	G2/M Checkpoints	-11.8161	-9.62801	17/167	4171,4999,5000,5683,5684,5685,5687,5689,5694,5700,5701,5702,5704,5705,5706,5708,10197	MCM2,ORC2,ORC4,PSMA2,PSMA3,PSMA4,PSMA6,PSMB1,PSMB6,PSMC1,PSMC2,PSMC3,PSMC4,PSMC5,PSMC6,PSMD2,PSME3
2_Member	KEGG Pathway	hsa05010	Alzheimer disease	-11.7562	-9.57106	24/384	836,1460,2475,2932,5291,5481,5683,5684,5685,5687,5689,5694,5700,5701,5702,5704,5705,5706,5708,5894,7280,8772,10383,203068	CASP3,CSNK2B,MTOR,GSK3B,PIK3CB,PPID,PSMA2,PSMA3,PSMA4,PSMA6,PSMB1,PSMB6,PSMC1,PSMC2,PSMC3,PSMC4,PSMC5,PSMC6,PSMD2,RAF1,TUBB2A,FADD,TUBB4B,TUBB
2_Member	Reactome Gene Sets	R-HSA-5668541	TNFR2 non-canonical NF-kB pathway	-11.6186	-9.43645	14/102	5683,5684,5685,5687,5689,5694,5700,5701,5702,5704,5705,5706,5708,10197	PSMA2,PSMA3,PSMA4,PSMA6,PSMB1,PSMB6,PSMC1,PSMC2,PSMC3,PSMC4,PSMC5,PSMC6,PSMD2,PSME3
2_Member	Reactome Gene Sets	R-HSA-9711123	Cellular response to chemical stress	-11.5974	-9.41817	18/199	1460,2932,5683,5684,5685,5687,5689,5694,5700,5701,5702,5704,5705,5706,5708,7296,8878,10197	CSNK2B,GSK3B,PSMA2,PSMA3,PSMA4,PSMA6,PSMB1,PSMB6,PSMC1,PSMC2,PSMC3,PSMC4,PSMC5,PSMC6,PSMD2,TXNRD1,SQSTM1,PSME3
2_Member	Reactome Gene Sets	R-HSA-382556	ABC-family proteins mediated transport	-11.5591	-9.38281	14/103	5683,5684,5685,5687,5689,5694,5700,5701,5702,5704,5705,5706,5708,10197	PSMA2,PSMA3,PSMA4,PSMA6,PSMB1,PSMB6,PSMC1,PSMC2,PSMC3,PSMC4,PSMC5,PSMC6,PSMD2,PSME3
2_Member	Reactome Gene Sets	R-HSA-69620	Cell Cycle Checkpoints	-11.4714	-9.30942	21/293	4171,4999,5000,5518,5683,5684,5685,5687,5689,5694,5700,5701,5702,5704,5705,5706,5708,10197,10726,55746,57122	MCM2,ORC2,ORC4,PPP2R1A,PSMA2,PSMA3,PSMA4,PSMA6,PSMB1,PSMB6,PSMC1,PSMC2,PSMC3,PSMC4,PSMC5,PSMC6,PSMD2,PSME3,NUDC,NUP133,NUP107
2_Member	Reactome Gene Sets	R-HSA-109581	Apoptosis	-11.2867	-9.13312	17/180	836,5683,5684,5685,5687,5689,5694,5700,5701,5702,5704,5705,5706,5708,8772,10197,28988	CASP3,PSMA2,PSMA3,PSMA4,PSMA6,PSMB1,PSMB6,PSMC1,PSMC2,PSMC3,PSMC4,PSMC5,PSMC6,PSMD2,FADD,PSME3,DBNL
2_Member	Reactome Gene Sets	R-HSA-5673001	RAF/MAP kinase cascade	-10.9237	-8.78106	20/280	402,1445,5291,5518,5683,5684,5685,5687,5689,5694,5700,5701,5702,5704,5705,5706,5708,5894,7414,10197	ARL2,CSK,PIK3CB,PPP2R1A,PSMA2,PSMA3,PSMA4,PSMA6,PSMB1,PSMB6,PSMC1,PSMC2,PSMC3,PSMC4,PSMC5,PSMC6,PSMD2,RAF1,VCL,PSME3
2_Member	GO Biological Processes	GO:0061136	regulation of proteasomal protein catabolic process	-10.7638	-8.62384	17/194	210,2932,3326,5700,5701,5702,5704,5705,5706,6613,8473,9097,10197,10425,11146,11345,160418	ALAD,GSK3B,HSP90AB1,PSMC1,PSMC2,PSMC3,PSMC4,PSMC5,PSMC6,SUMO2,OGT,USP14,PSME3,ARIH2,GLMN,GABARAPL2,TMTC3
2_Member	Reactome Gene Sets	R-HSA-5684996	MAPK1/MAPK3 signaling	-10.7568	-8.61947	20/286	402,1445,5291,5518,5683,5684,5685,5687,5689,5694,5700,5701,5702,5704,5705,5706,5708,5894,7414,10197	ARL2,CSK,PIK3CB,PPP2R1A,PSMA2,PSMA3,PSMA4,PSMA6,PSMB1,PSMB6,PSMC1,PSMC2,PSMC3,PSMC4,PSMC5,PSMC6,PSMD2,RAF1,VCL,PSME3
2_Member	GO Biological Processes	GO:0042176	regulation of protein catabolic process	-10.6053	-8.4759	22/361	210,1915,2932,3320,3326,5300,5700,5701,5702,5704,5705,5706,5708,6613,8473,8724,9097,10197,10425,11146,11345,160418	ALAD,EEF1A1,GSK3B,HSP90AA1,HSP90AB1,PIN1,PSMC1,PSMC2,PSMC3,PSMC4,PSMC5,PSMC6,PSMD2,SUMO2,OGT,SNX3,USP14,PSME3,ARIH2,GLMN,GABARAPL2,TMTC3
2_Member	GO Biological Processes	GO:0044265	cellular macromolecule catabolic process	-10.5987	-8.47194	32/779	2107,2237,2932,2935,5683,5684,5685,5687,5689,5694,5700,5701,5702,5704,5705,5706,5708,7323,7812,8761,8878,9097,9652,9958,10425,11059,11340,23392,23404,23708,51690,53918	ETF1,FEN1,GSK3B,GSPT1,PSMA2,PSMA3,PSMA4,PSMA6,PSMB1,PSMB6,PSMC1,PSMC2,PSMC3,PSMC4,PSMC5,PSMC6,PSMD2,UBE2D3,CSDE1,PABPC4,SQSTM1,USP14,SKIC3,USP15,ARIH2,WWP1,EXOSC8,ECPAS,EXOSC2,GSPT2,LSM7,PELO
2_Member	Reactome Gene Sets	R-HSA-5619115	Disorders of transmembrane transporters	-10.4051	-8.28858	16/176	5683,5684,5685,5687,5689,5694,5700,5701,5702,5704,5705,5706,5708,10197,55746,57122	PSMA2,PSMA3,PSMA4,PSMA6,PSMB1,PSMB6,PSMC1,PSMC2,PSMC3,PSMC4,PSMC5,PSMC6,PSMD2,PSME3,NUP133,NUP107
2_Member	Reactome Gene Sets	R-HSA-1257604	PIP3 activates AKT signaling	-10.3768	-8.26285	19/267	1460,2475,2932,5291,5518,5683,5684,5685,5687,5689,5694,5700,5701,5702,5704,5705,5706,5708,10197	CSNK2B,MTOR,GSK3B,PIK3CB,PPP2R1A,PSMA2,PSMA3,PSMA4,PSMA6,PSMB1,PSMB6,PSMC1,PSMC2,PSMC3,PSMC4,PSMC5,PSMC6,PSMD2,PSME3
2_Member	CORUM	CORUM:194	PA28gamma-20S proteasome	-10.2096	-8.10067	7/15	5683,5684,5685,5687,5689,5694,10197	PSMA2,PSMA3,PSMA4,PSMA6,PSMB1,PSMB6,PSME3
2_Member	Reactome Gene Sets	R-HSA-8939236	RUNX1 regulates transcription of genes involved in differentiation of HSCs	-10.1633	-8.06185	14/130	5683,5684,5685,5687,5689,5694,5700,5701,5702,5704,5705,5706,5708,10197	PSMA2,PSMA3,PSMA4,PSMA6,PSMB1,PSMB6,PSMC1,PSMC2,PSMC3,PSMC4,PSMC5,PSMC6,PSMD2,PSME3
2_Member	Reactome Gene Sets	R-HSA-9006925	Intracellular signaling by second messengers	-10.1533	-8.05664	20/309	1460,2475,2932,5291,5518,5683,5684,5685,5687,5689,5694,5700,5701,5702,5704,5705,5706,5708,10197,10768	CSNK2B,MTOR,GSK3B,PIK3CB,PPP2R1A,PSMA2,PSMA3,PSMA4,PSMA6,PSMB1,PSMB6,PSMC1,PSMC2,PSMC3,PSMC4,PSMC5,PSMC6,PSMD2,PSME3,AHCYL1
2_Member	Reactome Gene Sets	R-HSA-983168	Antigen processing: Ubiquitination & Proteasome degradation	-10.1533	-8.05664	20/309	5683,5684,5685,5687,5689,5694,5700,5701,5702,5704,5705,5706,5708,7064,7323,7335,10197,10425,11059,11146	PSMA2,PSMA3,PSMA4,PSMA6,PSMB1,PSMB6,PSMC1,PSMC2,PSMC3,PSMC4,PSMC5,PSMC6,PSMD2,THOP1,UBE2D3,UBE2V1,PSME3,ARIH2,WWP1,GLMN
2_Member	Reactome Gene Sets	R-HSA-1280215	Cytokine Signaling in Immune system	-9.96449	-7.87509	30/730	836,1432,1445,3312,3320,3936,5291,5300,5518,5683,5684,5685,5687,5689,5694,5700,5701,5702,5704,5705,5706,5708,6059,7323,7335,8878,9097,10197,55746,57122	CASP3,MAPK14,CSK,HSPA8,HSP90AA1,LCP1,PIK3CB,PIN1,PPP2R1A,PSMA2,PSMA3,PSMA4,PSMA6,PSMB1,PSMB6,PSMC1,PSMC2,PSMC3,PSMC4,PSMC5,PSMC6,PSMD2,ABCE1,UBE2D3,UBE2V1,SQSTM1,USP14,PSME3,NUP133,NUP107
2_Member	Reactome Gene Sets	R-HSA-5689880	Ub-specific processing proteases	-9.89986	-7.81284	17/220	5683,5684,5685,5687,5689,5694,5700,5701,5702,5704,5705,5706,5708,8724,9097,9958,10197	PSMA2,PSMA3,PSMA4,PSMA6,PSMB1,PSMB6,PSMC1,PSMC2,PSMC3,PSMC4,PSMC5,PSMC6,PSMD2,SNX3,USP14,USP15,PSME3
2_Member	Reactome Gene Sets	R-HSA-449147	Signaling by Interleukins	-9.87311	-7.78846	24/473	836,1432,3312,3320,3936,5291,5518,5683,5684,5685,5687,5689,5694,5700,5701,5702,5704,5705,5706,5708,7335,8878,9097,10197	CASP3,MAPK14,HSPA8,HSP90AA1,LCP1,PIK3CB,PPP2R1A,PSMA2,PSMA3,PSMA4,PSMA6,PSMB1,PSMB6,PSMC1,PSMC2,PSMC3,PSMC4,PSMC5,PSMC6,PSMD2,UBE2V1,SQSTM1,USP14,PSME3
2_Member	WikiPathways	WP2359	Parkin-ubiquitin proteasomal system pathway	-9.8385	-7.7562	11/71	3312,5700,5701,5702,5704,5705,5706,5708,7280,10383,203068	HSPA8,PSMC1,PSMC2,PSMC3,PSMC4,PSMC5,PSMC6,PSMD2,TUBB2A,TUBB4B,TUBB
2_Member	Reactome Gene Sets	R-HSA-5683057	MAPK family signaling cascades	-9.76424	-7.68661	20/325	402,1445,5291,5518,5683,5684,5685,5687,5689,5694,5700,5701,5702,5704,5705,5706,5708,5894,7414,10197	ARL2,CSK,PIK3CB,PPP2R1A,PSMA2,PSMA3,PSMA4,PSMA6,PSMB1,PSMB6,PSMC1,PSMC2,PSMC3,PSMC4,PSMC5,PSMC6,PSMD2,RAF1,VCL,PSME3
2_Member	GO Biological Processes	GO:1903050	regulation of proteolysis involved in protein catabolic process	-9.59887	-7.53043	17/230	210,2932,3326,5700,5701,5702,5704,5705,5706,6613,8473,9097,10197,10425,11146,11345,160418	ALAD,GSK3B,HSP90AB1,PSMC1,PSMC2,PSMC3,PSMC4,PSMC5,PSMC6,SUMO2,OGT,USP14,PSME3,ARIH2,GLMN,GABARAPL2,TMTC3
2_Member	Reactome Gene Sets	R-HSA-5688426	Deubiquitination	-9.56257	-7.49866	19/298	86,5683,5684,5685,5687,5689,5694,5700,5701,5702,5704,5705,5706,5708,8473,8724,9097,9958,10197	ACTL6A,PSMA2,PSMA3,PSMA4,PSMA6,PSMB1,PSMB6,PSMC1,PSMC2,PSMC3,PSMC4,PSMC5,PSMC6,PSMD2,OGT,SNX3,USP14,USP15,PSME3
2_Member	Reactome Gene Sets	R-HSA-201681	TCF dependent signaling in response to WNT	-9.51156	-7.44989	17/233	1460,2932,5518,5683,5684,5685,5687,5689,5694,5700,5701,5702,5704,5705,5706,5708,10197	CSNK2B,GSK3B,PPP2R1A,PSMA2,PSMA3,PSMA4,PSMA6,PSMB1,PSMB6,PSMC1,PSMC2,PSMC3,PSMC4,PSMC5,PSMC6,PSMD2,PSME3
2_Member	Reactome Gene Sets	R-HSA-3858494	Beta-catenin independent WNT signaling	-9.4849	-7.42769	14/146	5683,5684,5685,5687,5689,5694,5700,5701,5702,5704,5705,5706,5708,10197	PSMA2,PSMA3,PSMA4,PSMA6,PSMB1,PSMB6,PSMC1,PSMC2,PSMC3,PSMC4,PSMC5,PSMC6,PSMD2,PSME3
2_Member	Reactome Gene Sets	R-HSA-1280218	Adaptive Immune System	-9.42585	-7.37495	30/769	1445,2475,3693,5291,5518,5683,5684,5685,5687,5689,5694,5700,5701,5702,5704,5705,5706,5708,5894,7064,7280,7323,7335,10197,10383,10425,10540,10768,11059,11146	CSK,MTOR,ITGB5,PIK3CB,PPP2R1A,PSMA2,PSMA3,PSMA4,PSMA6,PSMB1,PSMB6,PSMC1,PSMC2,PSMC3,PSMC4,PSMC5,PSMC6,PSMD2,RAF1,THOP1,TUBB2A,UBE2D3,UBE2V1,PSME3,TUBB4B,ARIH2,DCTN2,AHCYL1,WWP1,GLMN
2_Member	Reactome Gene Sets	R-HSA-983169	Class I MHC mediated antigen processing & presentation	-9.34855	-7.30011	21/381	3693,5683,5684,5685,5687,5689,5694,5700,5701,5702,5704,5705,5706,5708,7064,7323,7335,10197,10425,11059,11146	ITGB5,PSMA2,PSMA3,PSMA4,PSMA6,PSMB1,PSMB6,PSMC1,PSMC2,PSMC3,PSMC4,PSMC5,PSMC6,PSMD2,THOP1,UBE2D3,UBE2V1,PSME3,ARIH2,WWP1,GLMN
2_Member	CORUM	CORUM:32	PA700 complex	-9.14762	-7.10134	7/20	5700,5701,5702,5704,5705,5706,5708	PSMC1,PSMC2,PSMC3,PSMC4,PSMC5,PSMC6,PSMD2
2_Member	KEGG Pathway	hsa05012	Parkinson disease	-8.63097	-6.59747	17/266	836,5683,5684,5685,5687,5689,5694,5700,5701,5702,5704,5705,5706,5708,7280,10383,203068	CASP3,PSMA2,PSMA3,PSMA4,PSMA6,PSMB1,PSMB6,PSMC1,PSMC2,PSMC3,PSMC4,PSMC5,PSMC6,PSMD2,TUBB2A,TUBB4B,TUBB
2_Member	CORUM	CORUM:191	20S proteasome	-8.53752	-6.50612	6/14	5683,5684,5685,5687,5689,5694	PSMA2,PSMA3,PSMA4,PSMA6,PSMB1,PSMB6
2_Member	Reactome Gene Sets	R-HSA-8878171	Transcriptional regulation by RUNX1	-8.44511	-6.41786	16/239	86,1460,5683,5684,5685,5687,5689,5694,5700,5701,5702,5704,5705,5706,5708,10197	ACTL6A,CSNK2B,PSMA2,PSMA3,PSMA4,PSMA6,PSMB1,PSMB6,PSMC1,PSMC2,PSMC3,PSMC4,PSMC5,PSMC6,PSMD2,PSME3
2_Member	Reactome Gene Sets	R-HSA-8951664	Neddylation	-8.2909	-6.27185	16/245	5683,5684,5685,5687,5689,5694,5700,5701,5702,5704,5705,5706,5708,7323,8878,10197	PSMA2,PSMA3,PSMA4,PSMA6,PSMB1,PSMB6,PSMC1,PSMC2,PSMC3,PSMC4,PSMC5,PSMC6,PSMD2,UBE2D3,SQSTM1,PSME3
2_Member	CORUM	CORUM:192	PA28-20S proteasome	-8.11898	-6.10796	6/16	5683,5684,5685,5687,5689,5694	PSMA2,PSMA3,PSMA4,PSMA6,PSMB1,PSMB6
2_Member	Reactome Gene Sets	R-HSA-195721	Signaling by WNT	-7.98107	-5.97795	18/332	1460,2932,5518,5683,5684,5685,5687,5689,5694,5700,5701,5702,5704,5705,5706,5708,8724,10197	CSNK2B,GSK3B,PPP2R1A,PSMA2,PSMA3,PSMA4,PSMA6,PSMB1,PSMB6,PSMC1,PSMC2,PSMC3,PSMC4,PSMC5,PSMC6,PSMD2,SNX3,PSME3
2_Member	GO Biological Processes	GO:0043161	proteasome-mediated ubiquitin-dependent protein catabolic process	-7.92073	-5.92151	18/335	2932,5683,5684,5685,5687,5689,5694,5700,5701,5702,5704,5705,5706,5708,7323,9097,11059,23392	GSK3B,PSMA2,PSMA3,PSMA4,PSMA6,PSMB1,PSMB6,PSMC1,PSMC2,PSMC3,PSMC4,PSMC5,PSMC6,PSMD2,UBE2D3,USP14,WWP1,ECPAS
2_Member	GO Biological Processes	GO:0010498	proteasomal protein catabolic process	-7.36986	-5.39146	18/364	2932,5683,5684,5685,5687,5689,5694,5700,5701,5702,5704,5705,5706,5708,7323,9097,11059,23392	GSK3B,PSMA2,PSMA3,PSMA4,PSMA6,PSMB1,PSMB6,PSMC1,PSMC2,PSMC3,PSMC4,PSMC5,PSMC6,PSMD2,UBE2D3,USP14,WWP1,ECPAS
2_Member	GO Biological Processes	GO:0043632	modification-dependent macromolecule catabolic process	-7.31835	-5.34546	23/591	2932,5683,5684,5685,5687,5689,5694,5700,5701,5702,5704,5705,5706,5708,7323,8878,9097,9958,10425,11059,11340,23392,23404	GSK3B,PSMA2,PSMA3,PSMA4,PSMA6,PSMB1,PSMB6,PSMC1,PSMC2,PSMC3,PSMC4,PSMC5,PSMC6,PSMD2,UBE2D3,SQSTM1,USP14,USP15,ARIH2,WWP1,EXOSC8,ECPAS,EXOSC2
2_Member	GO Biological Processes	GO:0030163	protein catabolic process	-7.16673	-5.20108	26/753	836,2475,2932,3312,3320,5683,5684,5685,5687,5689,5694,5700,5701,5702,5704,5705,5706,5708,7323,8878,9097,9958,10425,11059,23392,23761	CASP3,MTOR,GSK3B,HSPA8,HSP90AA1,PSMA2,PSMA3,PSMA4,PSMA6,PSMB1,PSMB6,PSMC1,PSMC2,PSMC3,PSMC4,PSMC5,PSMC6,PSMD2,UBE2D3,SQSTM1,USP14,USP15,ARIH2,WWP1,ECPAS,PISD
2_Member	Reactome Gene Sets	R-HSA-157118	Signaling by NOTCH	-6.8102	-4.86385	14/236	5683,5684,5685,5687,5689,5694,5700,5701,5702,5704,5705,5706,5708,10197	PSMA2,PSMA3,PSMA4,PSMA6,PSMB1,PSMB6,PSMC1,PSMC2,PSMC3,PSMC4,PSMC5,PSMC6,PSMD2,PSME3
2_Member	GO Biological Processes	GO:1901800	positive regulation of proteasomal protein catabolic process	-6.46904	-4.54445	10/117	2932,5700,5701,5702,5704,5705,5706,6613,10425,160418	GSK3B,PSMC1,PSMC2,PSMC3,PSMC4,PSMC5,PSMC6,SUMO2,ARIH2,TMTC3
2_Member	GO Biological Processes	GO:0006511	ubiquitin-dependent protein catabolic process	-6.35176	-4.43043	21/569	2932,5683,5684,5685,5687,5689,5694,5700,5701,5702,5704,5705,5706,5708,7323,8878,9097,9958,10425,11059,23392	GSK3B,PSMA2,PSMA3,PSMA4,PSMA6,PSMB1,PSMB6,PSMC1,PSMC2,PSMC3,PSMC4,PSMC5,PSMC6,PSMD2,UBE2D3,SQSTM1,USP14,USP15,ARIH2,WWP1,ECPAS
2_Member	GO Biological Processes	GO:0019941	modification-dependent protein catabolic process	-6.22955	-4.31941	21/579	2932,5683,5684,5685,5687,5689,5694,5700,5701,5702,5704,5705,5706,5708,7323,8878,9097,9958,10425,11059,23392	GSK3B,PSMA2,PSMA3,PSMA4,PSMA6,PSMB1,PSMB6,PSMC1,PSMC2,PSMC3,PSMC4,PSMC5,PSMC6,PSMD2,UBE2D3,SQSTM1,USP14,USP15,ARIH2,WWP1,ECPAS
2_Member	GO Biological Processes	GO:1903052	positive regulation of proteolysis involved in protein catabolic process	-5.83536	-3.94978	10/137	2932,5700,5701,5702,5704,5705,5706,6613,10425,160418	GSK3B,PSMC1,PSMC2,PSMC3,PSMC4,PSMC5,PSMC6,SUMO2,ARIH2,TMTC3
2_Member	GO Biological Processes	GO:0030162	regulation of proteolysis	-5.76136	-3.88756	23/726	210,2932,3326,3476,5269,5684,5700,5701,5702,5704,5705,5706,5894,6613,8473,8772,9097,9475,10197,10425,11146,11345,160418	ALAD,GSK3B,HSP90AB1,IGBP1,SERPINB6,PSMA3,PSMC1,PSMC2,PSMC3,PSMC4,PSMC5,PSMC6,RAF1,SUMO2,OGT,FADD,USP14,ROCK2,PSME3,ARIH2,GLMN,GABARAPL2,TMTC3
2_Member	GO Biological Processes	GO:0051603	proteolysis involved in protein catabolic process	-5.57339	-3.71668	21/637	2932,5683,5684,5685,5687,5689,5694,5700,5701,5702,5704,5705,5706,5708,7323,8878,9097,9958,10425,11059,23392	GSK3B,PSMA2,PSMA3,PSMA4,PSMA6,PSMB1,PSMB6,PSMC1,PSMC2,PSMC3,PSMC4,PSMC5,PSMC6,PSMD2,UBE2D3,SQSTM1,USP14,USP15,ARIH2,WWP1,ECPAS
2_Member	KEGG Pathway	hsa05169	Epstein-Barr virus infection	-5.1192	-3.29217	11/202	836,1432,5291,5700,5701,5702,5704,5705,5706,5708,8772	CASP3,MAPK14,PIK3CB,PSMC1,PSMC2,PSMC3,PSMC4,PSMC5,PSMC6,PSMD2,FADD
2_Member	GO Biological Processes	GO:0045732	positive regulation of protein catabolic process	-4.9795	-3.17286	11/209	2932,3320,5700,5701,5702,5704,5705,5706,6613,10425,160418	GSK3B,HSP90AA1,PSMC1,PSMC2,PSMC3,PSMC4,PSMC5,PSMC6,SUMO2,ARIH2,TMTC3
2_Member	GO Biological Processes	GO:0045862	positive regulation of proteolysis	-4.60364	-2.84228	14/365	2932,5700,5701,5702,5704,5705,5706,6613,8473,8772,9475,10197,10425,160418	GSK3B,PSMC1,PSMC2,PSMC3,PSMC4,PSMC5,PSMC6,SUMO2,OGT,FADD,ROCK2,PSME3,ARIH2,TMTC3
2_Member	Reactome Gene Sets	R-HSA-382551	Transport of small molecules	-3.29249	-1.67621	18/728	402,5683,5684,5685,5687,5689,5694,5700,5701,5702,5704,5705,5706,5708,5894,7037,10197,11059	ARL2,PSMA2,PSMA3,PSMA4,PSMA6,PSMB1,PSMB6,PSMC1,PSMC2,PSMC3,PSMC4,PSMC5,PSMC6,PSMD2,RAF1,TFRC,PSME3,WWP1
3_Summary	GO Biological Processes	GO:0006412	translation	-17.5113	-14.5043	30/375	833,1615,1915,1937,1938,1967,1983,2107,2197,2617,2935,3692,5917,6059,6222,6223,6301,7453,8565,8666,8668,8669,8761,8892,9255,9567,23367,23708,28985,84285,1975,7458,7064,10159,55915,440,8473,160418,3320,3326,8161,10419,23246,25980,27336,55299,79084,84154	CARS1,DARS1,EEF1A1,EEF1G,EEF2,EIF2B1,EIF5,ETF1,FAU,GARS1,GSPT1,EIF6,RARS1,ABCE1,RPS18,RPS19,SARS1,WARS1,YARS1,EIF3G,EIF3I,EIF3J,PABPC4,EIF2B2,AIMP1,GTPBP1,LARP1,GSPT2,MCTS1,EIF1AD,EIF4B,EIF4H,THOP1,ATP6AP2,LANCL2,ASNS,OGT,TMTC3,HSP90AA1,HSP90AB1,COIL,PRMT5,BOP1,AAR2,HTATSF1,BRIX1,WDR77,RPF2
3_Member	GO Biological Processes	GO:0006412	translation	-17.5113	-14.5043	30/375	833,1615,1915,1937,1938,1967,1983,2107,2197,2617,2935,3692,5917,6059,6222,6223,6301,7453,8565,8666,8668,8669,8761,8892,9255,9567,23367,23708,28985,84285	CARS1,DARS1,EEF1A1,EEF1G,EEF2,EIF2B1,EIF5,ETF1,FAU,GARS1,GSPT1,EIF6,RARS1,ABCE1,RPS18,RPS19,SARS1,WARS1,YARS1,EIF3G,EIF3I,EIF3J,PABPC4,EIF2B2,AIMP1,GTPBP1,LARP1,GSPT2,MCTS1,EIF1AD
3_Member	GO Biological Processes	GO:0043043	peptide biosynthetic process	-16.6453	-13.801	30/403	833,1615,1915,1937,1938,1967,1983,2107,2197,2617,2935,3692,5917,6059,6222,6223,6301,7453,8565,8666,8668,8669,8761,8892,9255,9567,23367,23708,28985,84285	CARS1,DARS1,EEF1A1,EEF1G,EEF2,EIF2B1,EIF5,ETF1,FAU,GARS1,GSPT1,EIF6,RARS1,ABCE1,RPS18,RPS19,SARS1,WARS1,YARS1,EIF3G,EIF3I,EIF3J,PABPC4,EIF2B2,AIMP1,GTPBP1,LARP1,GSPT2,MCTS1,EIF1AD
3_Member	WikiPathways	WP107	Translation factors	-16.2159	-13.4982	14/50	1915,1937,1938,1967,1975,1983,2107,3692,7458,8666,8668,8669,8892,23708	EEF1A1,EEF1G,EEF2,EIF2B1,EIF4B,EIF5,ETF1,EIF6,EIF4H,EIF3G,EIF3I,EIF3J,EIF2B2,GSPT2
3_Member	GO Biological Processes	GO:0006518	peptide metabolic process	-15.8257	-13.177	33/536	833,1615,1915,1937,1938,1967,1983,2107,2197,2617,2935,3692,5917,6059,6222,6223,6301,7064,7453,8565,8666,8668,8669,8761,8892,9255,9567,10159,23367,23708,28985,55915,84285	CARS1,DARS1,EEF1A1,EEF1G,EEF2,EIF2B1,EIF5,ETF1,FAU,GARS1,GSPT1,EIF6,RARS1,ABCE1,RPS18,RPS19,SARS1,THOP1,WARS1,YARS1,EIF3G,EIF3I,EIF3J,PABPC4,EIF2B2,AIMP1,GTPBP1,ATP6AP2,LARP1,GSPT2,MCTS1,LANCL2,EIF1AD
3_Member	Reactome Gene Sets	R-HSA-72766	Translation	-15.3453	-12.8154	25/292	833,1615,1915,1937,1938,1967,1975,1983,2107,2197,2617,2935,5917,6222,6223,6301,7453,7458,8565,8666,8668,8669,8892,9255,23708	CARS1,DARS1,EEF1A1,EEF1G,EEF2,EIF2B1,EIF4B,EIF5,ETF1,FAU,GARS1,GSPT1,RARS1,RPS18,RPS19,SARS1,WARS1,EIF4H,YARS1,EIF3G,EIF3I,EIF3J,EIF2B2,AIMP1,GSPT2
3_Member	GO Biological Processes	GO:0043604	amide biosynthetic process	-14.4788	-12.0378	31/521	440,833,1615,1915,1937,1938,1967,1983,2107,2197,2617,2935,3692,5917,6059,6222,6223,6301,7453,8565,8666,8668,8669,8761,8892,9255,9567,23367,23708,28985,84285	ASNS,CARS1,DARS1,EEF1A1,EEF1G,EEF2,EIF2B1,EIF5,ETF1,FAU,GARS1,GSPT1,EIF6,RARS1,ABCE1,RPS18,RPS19,SARS1,WARS1,YARS1,EIF3G,EIF3I,EIF3J,PABPC4,EIF2B2,AIMP1,GTPBP1,LARP1,GSPT2,MCTS1,EIF1AD
3_Member	GO Biological Processes	GO:0034645	cellular macromolecule biosynthetic process	-10.7283	-8.59636	32/770	833,1615,1915,1937,1938,1967,1983,2107,2197,2617,2935,3692,5917,6059,6222,6223,6301,7453,8473,8565,8666,8668,8669,8761,8892,9255,9567,23367,23708,28985,84285,160418	CARS1,DARS1,EEF1A1,EEF1G,EEF2,EIF2B1,EIF5,ETF1,FAU,GARS1,GSPT1,EIF6,RARS1,ABCE1,RPS18,RPS19,SARS1,WARS1,OGT,YARS1,EIF3G,EIF3I,EIF3J,PABPC4,EIF2B2,AIMP1,GTPBP1,LARP1,GSPT2,MCTS1,EIF1AD,TMTC3
3_Member	GO Biological Processes	GO:0006413	translational initiation	-10.1963	-8.08985	11/66	1967,1983,3692,6059,8666,8668,8669,8892,23367,28985,84285	EIF2B1,EIF5,EIF6,ABCE1,EIF3G,EIF3I,EIF3J,EIF2B2,LARP1,MCTS1,EIF1AD
3_Member	GO Biological Processes	GO:0022618	ribonucleoprotein complex assembly	-9.65782	-7.5871	17/228	1983,3320,3326,3692,6223,8161,8666,8668,8669,10419,23246,25980,27336,28985,55299,79084,84154	EIF5,HSP90AA1,HSP90AB1,EIF6,RPS19,COIL,EIF3G,EIF3I,EIF3J,PRMT5,BOP1,AAR2,HTATSF1,MCTS1,BRIX1,WDR77,RPF2
3_Member	GO Biological Processes	GO:0071826	ribonucleoprotein complex subunit organization	-9.42557	-7.37495	17/236	1983,3320,3326,3692,6223,8161,8666,8668,8669,10419,23246,25980,27336,28985,55299,79084,84154	EIF5,HSP90AA1,HSP90AB1,EIF6,RPS19,COIL,EIF3G,EIF3I,EIF3J,PRMT5,BOP1,AAR2,HTATSF1,MCTS1,BRIX1,WDR77,RPF2
3_Member	Reactome Gene Sets	R-HSA-72702	Ribosomal scanning and start codon recognition	-8.09104	-6.08201	9/59	1975,1983,2197,6222,6223,7458,8666,8668,8669	EIF4B,EIF5,FAU,RPS18,RPS19,EIF4H,EIF3G,EIF3I,EIF3J
3_Member	Reactome Gene Sets	R-HSA-72613	Eukaryotic Translation Initiation	-7.37312	-5.39287	11/120	1967,1975,1983,2197,6222,6223,7458,8666,8668,8669,8892	EIF2B1,EIF4B,EIF5,FAU,RPS18,RPS19,EIF4H,EIF3G,EIF3I,EIF3J,EIF2B2
3_Member	Reactome Gene Sets	R-HSA-72737	Cap-dependent Translation Initiation	-7.37312	-5.39287	11/120	1967,1975,1983,2197,6222,6223,7458,8666,8668,8669,8892	EIF2B1,EIF4B,EIF5,FAU,RPS18,RPS19,EIF4H,EIF3G,EIF3I,EIF3J,EIF2B2
3_Member	Reactome Gene Sets	R-HSA-72649	Translation initiation complex formation	-6.84091	-4.88938	8/59	1975,2197,6222,6223,7458,8666,8668,8669	EIF4B,FAU,RPS18,RPS19,EIF4H,EIF3G,EIF3I,EIF3J
3_Member	Reactome Gene Sets	R-HSA-72662	Activation of the mRNA upon binding of the cap-binding complex and eIFs, and subsequent binding to 43S	-6.78257	-4.83964	8/60	1975,2197,6222,6223,7458,8666,8668,8669	EIF4B,FAU,RPS18,RPS19,EIF4H,EIF3G,EIF3I,EIF3J
3_Member	GO Biological Processes	GO:0002181	cytoplasmic translation	-6.26645	-4.35155	10/123	1983,2107,2197,6222,6223,6301,8666,8668,8669,28985	EIF5,ETF1,FAU,RPS18,RPS19,SARS1,EIF3G,EIF3I,EIF3J,MCTS1
3_Member	Reactome Gene Sets	R-HSA-72706	GTP hydrolysis and joining of the 60S ribosomal subunit	-5.62188	-3.76236	9/113	1975,1983,2197,6222,6223,7458,8666,8668,8669	EIF4B,EIF5,FAU,RPS18,RPS19,EIF4H,EIF3G,EIF3I,EIF3J
3_Member	CORUM	CORUM:4403	EIF3 complex (EIF3A, EIF3B, EIF3G, EIF3I, EIF3J)	-4.99287	-3.18406	3/5	8666,8668,8669	EIF3G,EIF3I,EIF3J
3_Member	Reactome Gene Sets	R-HSA-72695	Formation of the ternary complex, and subsequently, the 43S complex	-4.84698	-3.05742	6/52	2197,6222,6223,8666,8668,8669	FAU,RPS18,RPS19,EIF3G,EIF3I,EIF3J
3_Member	GO Biological Processes	GO:0002183	cytoplasmic translational initiation	-4.77784	-2.99304	5/32	1983,8666,8668,8669,28985	EIF5,EIF3G,EIF3I,EIF3J,MCTS1
3_Member	GO Biological Processes	GO:0001732	formation of cytoplasmic translation initiation complex	-4.76632	-2.98387	4/16	1983,8666,8668,8669	EIF5,EIF3G,EIF3I,EIF3J
3_Member	WikiPathways	WP5027	nsp1 from SARS-CoV-2 inhibits translation initiation in the host cell	-4.76632	-2.98387	4/16	1983,8666,8668,8669	EIF5,EIF3G,EIF3I,EIF3J
3_Member	Reactome Gene Sets	R-HSA-156827	L13a-mediated translational silencing of Ceruloplasmin expression	-4.7112	-2.93691	8/112	1975,2197,6222,6223,7458,8666,8668,8669	EIF4B,FAU,RPS18,RPS19,EIF4H,EIF3G,EIF3I,EIF3J
3_Member	CORUM	CORUM:742	eIF3 complex (EIF3S6, EIF3S5, EIF3S4, EIF3S3, EIF3S6IP, EIF3S2, EIF3S9, EIF3S12, EIF3S10, EIF3S8, EIF3S1, EIF3S7)	-3.67337	-2.00604	3/12	8666,8668,8669	EIF3G,EIF3I,EIF3J
3_Member	CORUM	CORUM:1097	eIF3 complex (EIF3S6, EIF3S5, EIF3S4, EIF3S3, EIF3S6IP, EIF3S2, EIF3S9, EIF3S12, EIF3S10, EIF3S8, EIF3S1, EIF3S7, PCID1)	-3.56269	-1.90695	3/13	8666,8668,8669	EIF3G,EIF3I,EIF3J
3_Member	Reactome Gene Sets	R-HSA-72689	Formation of a pool of free 40S subunits	-3.21021	-1.60815	6/102	2197,6222,6223,8666,8668,8669	FAU,RPS18,RPS19,EIF3G,EIF3I,EIF3J
4_Summary	GO Biological Processes	GO:0034248	regulation of amide metabolic process	-12.617	-10.3644	30/571	836,1656,1938,1975,1983,2107,2475,2935,3692,5036,5300,6059,6301,7458,7812,8892,9221,9475,9689,11340,23367,23404,26058,28969,51611,53918,55239,56931,57103,253943,2932,5074	CASP3,DDX6,EEF2,EIF4B,EIF5,ETF1,MTOR,GSPT1,EIF6,PA2G4,PIN1,ABCE1,SARS1,EIF4H,CSDE1,EIF2B2,NOLC1,ROCK2,BZW1,EXOSC8,LARP1,EXOSC2,GIGYF2,BZW2,DPH5,PELO,OGFOD1,DUS3L,TIGAR,YTHDF3,GSK3B,PAWR
4_Member	GO Biological Processes	GO:0034248	regulation of amide metabolic process	-12.617	-10.3644	30/571	836,1656,1938,1975,1983,2107,2475,2935,3692,5036,5300,6059,6301,7458,7812,8892,9221,9475,9689,11340,23367,23404,26058,28969,51611,53918,55239,56931,57103,253943	CASP3,DDX6,EEF2,EIF4B,EIF5,ETF1,MTOR,GSPT1,EIF6,PA2G4,PIN1,ABCE1,SARS1,EIF4H,CSDE1,EIF2B2,NOLC1,ROCK2,BZW1,EXOSC8,LARP1,EXOSC2,GIGYF2,BZW2,DPH5,PELO,OGFOD1,DUS3L,TIGAR,YTHDF3
4_Member	GO Biological Processes	GO:0006417	regulation of translation	-11.5514	-9.37799	27/506	1656,1938,1975,1983,2107,2475,2935,3692,5036,6059,6301,7458,7812,8892,9221,9475,9689,11340,23367,23404,26058,28969,51611,53918,55239,56931,253943	DDX6,EEF2,EIF4B,EIF5,ETF1,MTOR,GSPT1,EIF6,PA2G4,ABCE1,SARS1,EIF4H,CSDE1,EIF2B2,NOLC1,ROCK2,BZW1,EXOSC8,LARP1,EXOSC2,GIGYF2,BZW2,DPH5,PELO,OGFOD1,DUS3L,YTHDF3
4_Member	GO Biological Processes	GO:2000112	regulation of cellular macromolecule biosynthetic process	-11.4261	-9.26695	29/594	1656,1938,1975,1983,2107,2475,2932,2935,3692,5036,5074,6059,6301,7458,7812,8892,9221,9475,9689,11340,23367,23404,26058,28969,51611,53918,55239,56931,253943	DDX6,EEF2,EIF4B,EIF5,ETF1,MTOR,GSK3B,GSPT1,EIF6,PA2G4,PAWR,ABCE1,SARS1,EIF4H,CSDE1,EIF2B2,NOLC1,ROCK2,BZW1,EXOSC8,LARP1,EXOSC2,GIGYF2,BZW2,DPH5,PELO,OGFOD1,DUS3L,YTHDF3
4_Member	GO Biological Processes	GO:0006446	regulation of translational initiation	-7.95355	-5.95238	10/82	1975,1983,2475,7458,7812,8892,9689,23367,28969,253943	EIF4B,EIF5,MTOR,EIF4H,CSDE1,EIF2B2,BZW1,LARP1,BZW2,YTHDF3
4_Member	GO Biological Processes	GO:0034250	positive regulation of amide metabolic process	-3.47668	-1.82963	8/168	836,1938,2475,3692,7812,9475,23367,253943	CASP3,EEF2,MTOR,EIF6,CSDE1,ROCK2,LARP1,YTHDF3
4_Member	GO Biological Processes	GO:0045727	positive regulation of translation	-2.49039	-1.02386	6/141	1938,2475,3692,7812,23367,253943	EEF2,MTOR,EIF6,CSDE1,LARP1,YTHDF3
4_Member	GO Biological Processes	GO:0045948	positive regulation of translational initiation	-2.42488	-0.966949	3/31	2475,23367,253943	MTOR,LARP1,YTHDF3
5_Summary	GO Biological Processes	GO:0055086	nucleobase-containing small molecule metabolic process	-12.2538	-10.0305	30/590	159,203,1841,1854,2475,2592,2617,2618,3094,3157,3312,3615,3704,3945,5901,6240,6241,7083,7264,7372,9567,10007,10020,11332,29789,51005,51292,55229,55312,57103,7296,3613,5291,23761,25979,8473,160418	ADSS2,AK1,DTYMK,DUT,MTOR,GALT,GARS1,GART,HINT1,HMGCS1,HSPA8,IMPDH2,ITPA,LDHB,RAN,RRM1,RRM2,TK1,GFUS,UMPS,GTPBP1,GNPDA1,GNE,ACOT7,OLA1,AMDHD2,GMPR2,PANK4,RFK,TIGAR,TXNRD1,IMPA2,PIK3CB,PISD,DHRS7B,OGT,TMTC3
5_Member	GO Biological Processes	GO:0055086	nucleobase-containing small molecule metabolic process	-12.2538	-10.0305	30/590	159,203,1841,1854,2475,2592,2617,2618,3094,3157,3312,3615,3704,3945,5901,6240,6241,7083,7264,7372,9567,10007,10020,11332,29789,51005,51292,55229,55312,57103	ADSS2,AK1,DTYMK,DUT,MTOR,GALT,GARS1,GART,HINT1,HMGCS1,HSPA8,IMPDH2,ITPA,LDHB,RAN,RRM1,RRM2,TK1,GFUS,UMPS,GTPBP1,GNPDA1,GNE,ACOT7,OLA1,AMDHD2,GMPR2,PANK4,RFK,TIGAR
5_Member	Reactome Gene Sets	R-HSA-15869	Metabolism of nucleotides	-10.5801	-8.45598	13/99	159,203,1841,1854,2618,3615,3704,6240,6241,7083,7296,7372,51292	ADSS2,AK1,DTYMK,DUT,GART,IMPDH2,ITPA,RRM1,RRM2,TK1,TXNRD1,UMPS,GMPR2
5_Member	GO Biological Processes	GO:0006753	nucleoside phosphate metabolic process	-8.99787	-6.95803	24/523	159,203,1841,1854,2617,2618,3094,3157,3312,3615,3704,3945,5901,6240,6241,7083,7372,9567,11332,29789,51292,55229,55312,57103	ADSS2,AK1,DTYMK,DUT,GARS1,GART,HINT1,HMGCS1,HSPA8,IMPDH2,ITPA,LDHB,RAN,RRM1,RRM2,TK1,UMPS,GTPBP1,ACOT7,OLA1,GMPR2,PANK4,RFK,TIGAR
5_Member	GO Biological Processes	GO:0009117	nucleotide metabolic process	-8.42141	-6.39622	23/515	159,203,1841,1854,2617,2618,3094,3157,3312,3615,3704,3945,5901,6240,6241,7372,9567,11332,29789,51292,55229,55312,57103	ADSS2,AK1,DTYMK,DUT,GARS1,GART,HINT1,HMGCS1,HSPA8,IMPDH2,ITPA,LDHB,RAN,RRM1,RRM2,UMPS,GTPBP1,ACOT7,OLA1,GMPR2,PANK4,RFK,TIGAR
5_Member	GO Biological Processes	GO:0009123	nucleoside monophosphate metabolic process	-8.28076	-6.26373	10/76	159,203,1841,1854,2618,3615,7083,7372,51292,55312	ADSS2,AK1,DTYMK,DUT,GART,IMPDH2,TK1,UMPS,GMPR2,RFK
5_Member	KEGG Pathway	hsa01232	Nucleotide metabolism	-7.80002	-5.80465	10/85	159,203,1841,1854,3615,3704,6240,6241,7083,51292	ADSS2,AK1,DTYMK,DUT,IMPDH2,ITPA,RRM1,RRM2,TK1,GMPR2
5_Member	GO Biological Processes	GO:0009124	nucleoside monophosphate biosynthetic process	-6.689	-4.7545	7/42	159,1854,2618,3615,7083,7372,55312	ADSS2,DUT,GART,IMPDH2,TK1,UMPS,RFK
5_Member	GO Biological Processes	GO:1901293	nucleoside phosphate biosynthetic process	-6.2596	-4.34629	14/262	159,203,1841,1854,2617,2618,3615,6240,6241,7083,7372,11332,55229,55312	ADSS2,AK1,DTYMK,DUT,GARS1,GART,IMPDH2,RRM1,RRM2,TK1,UMPS,ACOT7,PANK4,RFK
5_Member	GO Biological Processes	GO:0009259	ribonucleotide metabolic process	-6.10041	-4.19498	17/398	159,203,2618,3094,3157,3312,3615,3704,5901,7372,9567,11332,29789,51292,55229,55312,57103	ADSS2,AK1,GART,HINT1,HMGCS1,HSPA8,IMPDH2,ITPA,RAN,UMPS,GTPBP1,ACOT7,OLA1,GMPR2,PANK4,RFK,TIGAR
5_Member	GO Biological Processes	GO:0019693	ribose phosphate metabolic process	-5.96743	-4.07127	17/407	159,203,2618,3094,3157,3312,3615,3704,5901,7372,9567,11332,29789,51292,55229,55312,57103	ADSS2,AK1,GART,HINT1,HMGCS1,HSPA8,IMPDH2,ITPA,RAN,UMPS,GTPBP1,ACOT7,OLA1,GMPR2,PANK4,RFK,TIGAR
5_Member	GO Biological Processes	GO:0009161	ribonucleoside monophosphate metabolic process	-5.65104	-3.78587	7/59	159,203,2618,3615,7372,51292,55312	ADSS2,AK1,GART,IMPDH2,UMPS,GMPR2,RFK
5_Member	GO Biological Processes	GO:0090407	organophosphate biosynthetic process	-5.55588	-3.70056	19/535	159,203,1841,1854,2617,2618,3157,3613,3615,5291,6240,6241,7083,7372,11332,23761,25979,55229,55312	ADSS2,AK1,DTYMK,DUT,GARS1,GART,HMGCS1,IMPA2,IMPDH2,PIK3CB,RRM1,RRM2,TK1,UMPS,ACOT7,PISD,DHRS7B,PANK4,RFK
5_Member	GO Biological Processes	GO:0009165	nucleotide biosynthetic process	-5.53482	-3.68227	13/260	159,203,1841,1854,2617,2618,3615,6240,6241,7372,11332,55229,55312	ADSS2,AK1,DTYMK,DUT,GARS1,GART,IMPDH2,RRM1,RRM2,UMPS,ACOT7,PANK4,RFK
5_Member	GO Biological Processes	GO:0009150	purine ribonucleotide metabolic process	-5.05264	-3.2308	15/379	159,203,2618,3094,3157,3312,3615,3704,5901,9567,11332,29789,51292,55229,57103	ADSS2,AK1,GART,HINT1,HMGCS1,HSPA8,IMPDH2,ITPA,RAN,GTPBP1,ACOT7,OLA1,GMPR2,PANK4,TIGAR
5_Member	Reactome Gene Sets	R-HSA-8956320	Nucleotide biosynthesis	-5.01899	-3.201	4/14	159,2618,3615,7372	ADSS2,GART,IMPDH2,UMPS
5_Member	KEGG Pathway	hsa00983	Drug metabolism - other enzymes	-4.76085	-2.97958	7/80	1854,3615,3704,6240,6241,7083,7372	DUT,IMPDH2,ITPA,RRM1,RRM2,TK1,UMPS
5_Member	GO Biological Processes	GO:0006163	purine nucleotide metabolic process	-4.69177	-2.92059	16/457	159,203,2618,3094,3157,3312,3615,3704,3945,5901,9567,11332,29789,51292,55229,57103	ADSS2,AK1,GART,HINT1,HMGCS1,HSPA8,IMPDH2,ITPA,LDHB,RAN,GTPBP1,ACOT7,OLA1,GMPR2,PANK4,TIGAR
5_Member	GO Biological Processes	GO:0009156	ribonucleoside monophosphate biosynthetic process	-4.64461	-2.87834	5/34	159,2618,3615,7372,55312	ADSS2,GART,IMPDH2,UMPS,RFK
5_Member	GO Biological Processes	GO:1901137	carbohydrate derivative biosynthetic process	-4.41411	-2.66995	18/590	159,203,1841,1854,2618,3615,6240,6241,7264,7372,8473,10007,10020,11332,51005,55229,55312,160418	ADSS2,AK1,DTYMK,DUT,GART,IMPDH2,RRM1,RRM2,GFUS,UMPS,OGT,GNPDA1,GNE,ACOT7,AMDHD2,PANK4,RFK,TMTC3
5_Member	GO Biological Processes	GO:0072521	purine-containing compound metabolic process	-4.36069	-2.61867	16/487	159,203,2618,3094,3157,3312,3615,3704,3945,5901,9567,11332,29789,51292,55229,57103	ADSS2,AK1,GART,HINT1,HMGCS1,HSPA8,IMPDH2,ITPA,LDHB,RAN,GTPBP1,ACOT7,OLA1,GMPR2,PANK4,TIGAR
5_Member	KEGG Pathway	hsa00230	Purine metabolism	-4.29374	-2.55599	8/128	159,203,2618,3615,3704,6240,6241,51292	ADSS2,AK1,GART,IMPDH2,ITPA,RRM1,RRM2,GMPR2
5_Member	GO Biological Processes	GO:0009141	nucleoside triphosphate metabolic process	-4.24509	-2.51157	10/208	203,1841,1854,3312,3615,3704,5901,9567,29789,57103	AK1,DTYMK,DUT,HSPA8,IMPDH2,ITPA,RAN,GTPBP1,OLA1,TIGAR
5_Member	GO Biological Processes	GO:0009167	purine ribonucleoside monophosphate metabolic process	-4.18809	-2.4598	5/42	159,203,2618,3615,51292	ADSS2,AK1,GART,IMPDH2,GMPR2
5_Member	GO Biological Processes	GO:0009126	purine nucleoside monophosphate metabolic process	-4.08921	-2.37421	5/44	159,203,2618,3615,51292	ADSS2,AK1,GART,IMPDH2,GMPR2
5_Member	Reactome Gene Sets	R-HSA-73817	Purine ribonucleoside monophosphate biosynthesis	-3.79504	-2.11021	3/11	159,2618,3615	ADSS2,GART,IMPDH2
5_Member	GO Biological Processes	GO:0009205	purine ribonucleoside triphosphate metabolic process	-3.22994	-1.62476	8/183	203,3312,3615,3704,5901,9567,29789,57103	AK1,HSPA8,IMPDH2,ITPA,RAN,GTPBP1,OLA1,TIGAR
5_Member	GO Biological Processes	GO:0009144	purine nucleoside triphosphate metabolic process	-3.15329	-1.56424	8/188	203,3312,3615,3704,5901,9567,29789,57103	AK1,HSPA8,IMPDH2,ITPA,RAN,GTPBP1,OLA1,TIGAR
5_Member	GO Biological Processes	GO:0009199	ribonucleoside triphosphate metabolic process	-3.12334	-1.54103	8/190	203,3312,3615,3704,5901,9567,29789,57103	AK1,HSPA8,IMPDH2,ITPA,RAN,GTPBP1,OLA1,TIGAR
5_Member	GO Biological Processes	GO:0009168	purine ribonucleoside monophosphate biosynthetic process	-2.98499	-1.43417	3/20	159,2618,3615	ADSS2,GART,IMPDH2
5_Member	GO Biological Processes	GO:0009260	ribonucleotide biosynthetic process	-2.89745	-1.35955	8/206	159,203,2618,3615,7372,11332,55229,55312	ADSS2,AK1,GART,IMPDH2,UMPS,ACOT7,PANK4,RFK
5_Member	GO Biological Processes	GO:0009127	purine nucleoside monophosphate biosynthetic process	-2.86088	-1.33095	3/22	159,2618,3615	ADSS2,GART,IMPDH2
5_Member	WikiPathways	WP4224	Purine metabolism and related disorders	-2.86088	-1.33095	3/22	159,2618,3704	ADSS2,GART,ITPA
5_Member	GO Biological Processes	GO:0046390	ribose phosphate biosynthetic process	-2.80563	-1.27939	8/213	159,203,2618,3615,7372,11332,55229,55312	ADSS2,AK1,GART,IMPDH2,UMPS,ACOT7,PANK4,RFK
5_Member	GO Biological Processes	GO:0046033	AMP metabolic process	-2.69643	-1.19019	3/25	159,203,2618	ADSS2,AK1,GART
5_Member	GO Biological Processes	GO:0046039	GTP metabolic process	-2.69643	-1.19019	3/25	3615,5901,9567	IMPDH2,RAN,GTPBP1
5_Member	GO Biological Processes	GO:0046037	GMP metabolic process	-2.59852	-1.11058	3/27	2618,3615,51292	GART,IMPDH2,GMPR2
6_Summary	GO Biological Processes	GO:1900180	regulation of protein localization to nucleus	-12.2335	-10.0176	16/134	705,908,1432,1736,2932,3320,5300,5901,7037,9221,10574,10575,10576,10694,22948,55696,1445,3301,3312,3936,5481,7323,8724,10425,3326,8878,9475,6613	BYSL,CCT6A,MAPK14,DKC1,GSK3B,HSP90AA1,PIN1,RAN,TFRC,NOLC1,CCT7,CCT4,CCT2,CCT8,CCT5,RBM22,CSK,DNAJA1,HSPA8,LCP1,PPID,UBE2D3,SNX3,ARIH2,HSP90AB1,SQSTM1,ROCK2,SUMO2
6_Member	GO Biological Processes	GO:1900180	regulation of protein localization to nucleus	-12.2335	-10.0176	16/134	705,908,1432,1736,2932,3320,5300,5901,7037,9221,10574,10575,10576,10694,22948,55696	BYSL,CCT6A,MAPK14,DKC1,GSK3B,HSP90AA1,PIN1,RAN,TFRC,NOLC1,CCT7,CCT4,CCT2,CCT8,CCT5,RBM22
6_Member	GO Biological Processes	GO:1900182	positive regulation of protein localization to nucleus	-10.128	-8.03375	12/86	908,1432,1736,3320,5901,7037,10574,10575,10576,10694,22948,55696	CCT6A,MAPK14,DKC1,HSP90AA1,RAN,TFRC,CCT7,CCT4,CCT2,CCT8,CCT5,RBM22
6_Member	GO Biological Processes	GO:0070201	regulation of establishment of protein localization	-6.69663	-4.76046	21/542	908,1432,1445,1736,2932,3301,3312,3320,3936,5481,5901,7323,8724,9221,10425,10574,10575,10576,10694,22948,55696	CCT6A,MAPK14,CSK,DKC1,GSK3B,DNAJA1,HSPA8,HSP90AA1,LCP1,PPID,RAN,UBE2D3,SNX3,NOLC1,ARIH2,CCT7,CCT4,CCT2,CCT8,CCT5,RBM22
6_Member	GO Biological Processes	GO:1903829	positive regulation of protein localization	-6.4298	-4.50684	19/467	908,1432,1736,2932,3320,3326,5481,5901,7037,7323,8878,9475,10425,10574,10575,10576,10694,22948,55696	CCT6A,MAPK14,DKC1,GSK3B,HSP90AA1,HSP90AB1,PPID,RAN,TFRC,UBE2D3,SQSTM1,ROCK2,ARIH2,CCT7,CCT4,CCT2,CCT8,CCT5,RBM22
6_Member	GO Biological Processes	GO:1904951	positive regulation of establishment of protein localization	-5.87896	-3.99039	15/324	908,1432,1736,2932,3320,5481,5901,7323,10425,10574,10575,10576,10694,22948,55696	CCT6A,MAPK14,DKC1,GSK3B,HSP90AA1,PPID,RAN,UBE2D3,ARIH2,CCT7,CCT4,CCT2,CCT8,CCT5,RBM22
6_Member	GO Biological Processes	GO:0042306	regulation of protein import into nucleus	-3.51421	-1.86544	5/58	1432,3320,5901,9221,55696	MAPK14,HSP90AA1,RAN,NOLC1,RBM22
6_Member	GO Biological Processes	GO:0046824	positive regulation of nucleocytoplasmic transport	-3.44513	-1.80915	5/60	1432,2932,3320,5901,55696	MAPK14,GSK3B,HSP90AA1,RAN,RBM22
6_Member	GO Biological Processes	GO:0033157	regulation of intracellular protein transport	-3.3001	-1.68302	9/224	1432,2932,3320,3936,5901,7323,9221,10425,55696	MAPK14,GSK3B,HSP90AA1,LCP1,RAN,UBE2D3,NOLC1,ARIH2,RBM22
6_Member	GO Biological Processes	GO:0042307	positive regulation of protein import into nucleus	-3.19095	-1.59659	4/39	1432,3320,5901,55696	MAPK14,HSP90AA1,RAN,RBM22
6_Member	GO Biological Processes	GO:0046822	regulation of nucleocytoplasmic transport	-3.1007	-1.52208	6/107	1432,2932,3320,5901,9221,55696	MAPK14,GSK3B,HSP90AA1,RAN,NOLC1,RBM22
6_Member	GO Biological Processes	GO:0051223	regulation of protein transport	-3.04778	-1.48078	14/517	1432,1445,2932,3301,3312,3320,3936,5481,5901,7323,8724,9221,10425,55696	MAPK14,CSK,GSK3B,DNAJA1,HSPA8,HSP90AA1,LCP1,PPID,RAN,UBE2D3,SNX3,NOLC1,ARIH2,RBM22
6_Member	GO Biological Processes	GO:0090316	positive regulation of intracellular protein transport	-2.9724	-1.42433	7/155	1432,2932,3320,5901,7323,10425,55696	MAPK14,GSK3B,HSP90AA1,RAN,UBE2D3,ARIH2,RBM22
6_Member	Canonical Pathways	M151	PID AR TF PATHWAY	-2.6877	-1.18457	4/53	1432,2932,3301,3320	MAPK14,GSK3B,DNAJA1,HSP90AA1
6_Member	GO Biological Processes	GO:0032386	regulation of intracellular transport	-2.65318	-1.15313	10/332	1432,2932,3320,3936,5901,7323,8724,9221,10425,55696	MAPK14,GSK3B,HSP90AA1,LCP1,RAN,UBE2D3,SNX3,NOLC1,ARIH2,RBM22
6_Member	GO Biological Processes	GO:0032388	positive regulation of intracellular transport	-2.38592	-0.939529	7/197	1432,2932,3320,5901,7323,10425,55696	MAPK14,GSK3B,HSP90AA1,RAN,UBE2D3,ARIH2,RBM22
6_Member	Canonical Pathways	M115	PID REG GR PATHWAY	-2.01063	-0.63475	4/82	1432,2932,3320,6613	MAPK14,GSK3B,HSP90AA1,SUMO2
7_Summary	GO Biological Processes	GO:1904874	positive regulation of telomerase RNA localization to Cajal body	-12.2101	-9.99738	8/15	908,1736,10574,10575,10576,10694,22948,55651,402,3301,3312,3320,3326,5481,6905,7265,7266,10726,10808,51645,53938,5111,64785,84296,7280,10383,1460,10528,3476,5518,9961,55671,86,2237,10592,64151,7037,9643,57103,4171,7335,10419,54107,8260,56984,2475,2932,3936,9475,9948,23075,49856,27241,836,5300,5434,9675,10910,23210,55079,8546,10007	CCT6A,DKC1,CCT7,CCT4,CCT2,CCT8,CCT5,NHP2,ARL2,DNAJA1,HSPA8,HSP90AA1,HSP90AB1,PPID,TBCE,TTC1,DNAJC7,NUDC,HSPH1,PPIL1,PPIL3,PCNA,GINS3,GINS4,TUBB2A,TUBB4B,CSNK2B,NOP56,IGBP1,PPP2R1A,MVP,PPP4R3A,ACTL6A,FEN1,SMC2,NCAPG,TFRC,MORF4L2,TIGAR,MCM2,UBE2V1,PRMT5,POLE3,NAA10,PSMG2,MTOR,GSK3B,LCP1,ROCK2,WDR1,SWAP70,WRAP73,BBS9,CASP3,PIN1,POLR2E,TTI1,SUGT1,JMJD6,FEZF2,AP3B1,GNPDA1
7_Member	GO Biological Processes	GO:1904874	positive regulation of telomerase RNA localization to Cajal body	-12.2101	-9.99738	8/15	908,1736,10574,10575,10576,10694,22948,55651	CCT6A,DKC1,CCT7,CCT4,CCT2,CCT8,CCT5,NHP2
7_Member	GO Biological Processes	GO:0006457	protein folding	-11.9938	-9.79351	19/216	402,908,3301,3312,3320,3326,5481,6905,7265,7266,10574,10575,10576,10694,10726,10808,22948,51645,53938	ARL2,CCT6A,DNAJA1,HSPA8,HSP90AA1,HSP90AB1,PPID,TBCE,TTC1,DNAJC7,CCT7,CCT4,CCT2,CCT8,NUDC,HSPH1,CCT5,PPIL1,PPIL3
7_Member	GO Biological Processes	GO:1904851	positive regulation of establishment of protein localization to telomere	-11.9201	-9.72896	7/10	908,1736,10574,10575,10576,10694,22948	CCT6A,DKC1,CCT7,CCT4,CCT2,CCT8,CCT5
7_Member	GO Biological Processes	GO:0070203	regulation of establishment of protein localization to telomere	-11.4845	-9.31973	7/11	908,1736,10574,10575,10576,10694,22948	CCT6A,DKC1,CCT7,CCT4,CCT2,CCT8,CCT5
7_Member	GO Biological Processes	GO:1904869	regulation of protein localization to Cajal body	-11.4845	-9.31973	7/11	908,1736,10574,10575,10576,10694,22948	CCT6A,DKC1,CCT7,CCT4,CCT2,CCT8,CCT5
7_Member	GO Biological Processes	GO:1904871	positive regulation of protein localization to Cajal body	-11.4845	-9.31973	7/11	908,1736,10574,10575,10576,10694,22948	CCT6A,DKC1,CCT7,CCT4,CCT2,CCT8,CCT5
7_Member	GO Biological Processes	GO:1904872	regulation of telomerase RNA localization to Cajal body	-11.3891	-9.23275	8/18	908,1736,10574,10575,10576,10694,22948,55651	CCT6A,DKC1,CCT7,CCT4,CCT2,CCT8,CCT5,NHP2
7_Member	GO Biological Processes	GO:0070202	regulation of establishment of protein localization to chromosome	-11.1081	-8.96001	7/12	908,1736,10574,10575,10576,10694,22948	CCT6A,DKC1,CCT7,CCT4,CCT2,CCT8,CCT5
7_Member	GO Biological Processes	GO:1904816	positive regulation of protein localization to chromosome, telomeric region	-11.1081	-8.96001	7/12	908,1736,10574,10575,10576,10694,22948	CCT6A,DKC1,CCT7,CCT4,CCT2,CCT8,CCT5
7_Member	GO Biological Processes	GO:2000573	positive regulation of DNA biosynthetic process	-10.924	-8.78106	12/74	908,1736,3320,3326,5111,10574,10575,10576,10694,22948,64785,84296	CCT6A,DKC1,HSP90AA1,HSP90AB1,PCNA,CCT7,CCT4,CCT2,CCT8,CCT5,GINS3,GINS4
7_Member	CORUM	CORUM:126	CCT complex (chaperonin containing TCP1 complex)	-10.5456	-8.42405	6/8	908,10574,10575,10576,10694,22948	CCT6A,CCT7,CCT4,CCT2,CCT8,CCT5
7_Member	GO Biological Processes	GO:1904814	regulation of protein localization to chromosome, telomeric region	-10.4788	-8.3598	7/14	908,1736,10574,10575,10576,10694,22948	CCT6A,DKC1,CCT7,CCT4,CCT2,CCT8,CCT5
7_Member	Reactome Gene Sets	R-HSA-389960	Formation of tubulin folding intermediates by CCT/TriC	-10.0229	-7.93108	8/25	908,7280,10383,10574,10575,10576,10694,22948	CCT6A,TUBB2A,TUBB4B,CCT7,CCT4,CCT2,CCT8,CCT5
7_Member	Reactome Gene Sets	R-HSA-390450	Folding of actin by CCT/TriC	-9.67801	-7.605	6/10	908,10574,10575,10576,10694,22948	CCT6A,CCT7,CCT4,CCT2,CCT8,CCT5
7_Member	Reactome Gene Sets	R-HSA-389957	Prefoldin mediated transfer of substrate to CCT/TriC	-9.57591	-7.50974	8/28	908,7280,10383,10574,10575,10576,10694,22948	CCT6A,TUBB2A,TUBB4B,CCT7,CCT4,CCT2,CCT8,CCT5
7_Member	Reactome Gene Sets	R-HSA-391251	Protein folding	-9.50244	-7.443	12/97	402,908,1460,6905,7280,10383,10528,10574,10575,10576,10694,22948	ARL2,CCT6A,CSNK2B,TBCE,TUBB2A,TUBB4B,NOP56,CCT7,CCT4,CCT2,CCT8,CCT5
7_Member	WikiPathways	WP4949	16p11.2 proximal deletion syndrome	-9.44536	-7.39035	11/77	908,3476,5111,5518,9961,10574,10575,10576,10694,22948,55671	CCT6A,IGBP1,PCNA,PPP2R1A,MVP,CCT7,CCT4,CCT2,CCT8,CCT5,PPP4R3A
7_Member	Reactome Gene Sets	R-HSA-389958	Cooperation of Prefoldin and TriC/CCT in actin and tubulin folding	-9.06175	-7.01763	8/32	908,7280,10383,10574,10575,10576,10694,22948	CCT6A,TUBB2A,TUBB4B,CCT7,CCT4,CCT2,CCT8,CCT5
7_Member	GO Biological Processes	GO:0061077	chaperone-mediated protein folding	-8.76599	-6.73039	10/68	908,3312,5481,7266,10574,10575,10576,10694,10808,22948	CCT6A,HSPA8,PPID,DNAJC7,CCT7,CCT4,CCT2,CCT8,HSPH1,CCT5
7_Member	GO Biological Processes	GO:2000278	regulation of DNA biosynthetic process	-8.38106	-6.35793	12/121	908,1736,3320,3326,5111,10574,10575,10576,10694,22948,64785,84296	CCT6A,DKC1,HSP90AA1,HSP90AB1,PCNA,CCT7,CCT4,CCT2,CCT8,CCT5,GINS3,GINS4
7_Member	GO Biological Processes	GO:2001252	positive regulation of chromosome organization	-7.7277	-5.73426	11/111	86,908,1736,2237,10574,10575,10576,10592,10694,22948,64151	ACTL6A,CCT6A,DKC1,FEN1,CCT7,CCT4,CCT2,SMC2,CCT8,CCT5,NCAPG
7_Member	Reactome Gene Sets	R-HSA-390466	Chaperonin-mediated protein folding	-7.5107	-5.52295	10/91	908,1460,7280,10383,10528,10574,10575,10576,10694,22948	CCT6A,CSNK2B,TUBB2A,TUBB4B,NOP56,CCT7,CCT4,CCT2,CCT8,CCT5
7_Member	GO Biological Processes	GO:0032212	positive regulation of telomere maintenance via telomerase	-7.35911	-5.38439	7/34	908,1736,10574,10575,10576,10694,22948	CCT6A,DKC1,CCT7,CCT4,CCT2,CCT8,CCT5
7_Member	GO Biological Processes	GO:1904358	positive regulation of telomere maintenance via telomere lengthening	-7.08853	-5.12466	7/37	908,1736,10574,10575,10576,10694,22948	CCT6A,DKC1,CCT7,CCT4,CCT2,CCT8,CCT5
7_Member	Reactome Gene Sets	R-HSA-6814122	Cooperation of PDCL (PhLP1) and TRiC/CCT in G-protein beta folding	-7.00387	-5.04534	7/38	908,1460,10574,10575,10576,10694,22948	CCT6A,CSNK2B,CCT7,CCT4,CCT2,CCT8,CCT5
7_Member	GO Biological Processes	GO:0051054	positive regulation of DNA metabolic process	-7.00078	-5.04401	16/303	86,908,1736,3320,3326,5111,7037,9643,10574,10575,10576,10694,22948,57103,64785,84296	ACTL6A,CCT6A,DKC1,HSP90AA1,HSP90AB1,PCNA,TFRC,MORF4L2,CCT7,CCT4,CCT2,CCT8,CCT5,TIGAR,GINS3,GINS4
7_Member	Reactome Gene Sets	R-HSA-390471	Association of TriC/CCT with target proteins during biosynthesis	-6.92173	-4.96846	7/39	908,10528,10574,10575,10576,10694,22948	CCT6A,NOP56,CCT7,CCT4,CCT2,CCT8,CCT5
7_Member	GO Biological Processes	GO:0051052	regulation of DNA metabolic process	-6.70984	-4.77199	21/541	86,908,1736,3320,3326,4171,5111,5518,7037,7335,9643,10419,10574,10575,10576,10694,22948,54107,57103,64785,84296	ACTL6A,CCT6A,DKC1,HSP90AA1,HSP90AB1,MCM2,PCNA,PPP2R1A,TFRC,UBE2V1,MORF4L2,PRMT5,CCT7,CCT4,CCT2,CCT8,CCT5,POLE3,TIGAR,GINS3,GINS4
7_Member	GO Biological Processes	GO:0033044	regulation of chromosome organization	-6.50505	-4.57882	14/250	86,908,1736,2237,4171,8260,10574,10575,10576,10592,10694,22948,56984,64151	ACTL6A,CCT6A,DKC1,FEN1,MCM2,NAA10,CCT7,CCT4,CCT2,SMC2,CCT8,CCT5,PSMG2,NCAPG
7_Member	GO Biological Processes	GO:0032206	positive regulation of telomere maintenance	-6.2537	-4.34198	8/70	86,908,1736,10574,10575,10576,10694,22948	ACTL6A,CCT6A,DKC1,CCT7,CCT4,CCT2,CCT8,CCT5
7_Member	GO Biological Processes	GO:0032210	regulation of telomere maintenance via telomerase	-5.9735	-4.07581	7/53	908,1736,10574,10575,10576,10694,22948	CCT6A,DKC1,CCT7,CCT4,CCT2,CCT8,CCT5
7_Member	GO Biological Processes	GO:0010638	positive regulation of organelle organization	-5.90939	-4.0178	19/506	86,402,908,1736,2237,2475,2932,3936,9475,9948,10574,10575,10576,10592,10694,22948,23075,49856,64151	ACTL6A,ARL2,CCT6A,DKC1,FEN1,MTOR,GSK3B,LCP1,ROCK2,WDR1,CCT7,CCT4,CCT2,SMC2,CCT8,CCT5,SWAP70,WRAP73,NCAPG
7_Member	CORUM	CORUM:6247	BBS-chaperonin complex	-5.68328	-3.81525	4/10	10575,10576,10694,22948	CCT4,CCT2,CCT8,CCT5
7_Member	GO Biological Processes	GO:1904356	regulation of telomere maintenance via telomere lengthening	-5.55175	-3.69782	7/61	908,1736,10574,10575,10576,10694,22948	CCT6A,DKC1,CCT7,CCT4,CCT2,CCT8,CCT5
7_Member	GO Biological Processes	GO:1901998	toxin transport	-5.52726	-3.6761	6/40	3301,10574,10575,10576,10694,22948	DNAJA1,CCT7,CCT4,CCT2,CCT8,CCT5
7_Member	Reactome Gene Sets	R-HSA-5620922	BBSome-mediated cargo-targeting to cilium	-5.52241	-3.67263	5/23	10575,10576,10694,22948,27241	CCT4,CCT2,CCT8,CCT5,BBS9
7_Member	GO Biological Processes	GO:0031647	regulation of protein stability	-5.21217	-3.37919	14/322	836,908,3312,3320,3326,5300,5434,9675,10574,10575,10576,10694,10910,22948	CASP3,CCT6A,HSPA8,HSP90AA1,HSP90AB1,PIN1,POLR2E,TTI1,CCT7,CCT4,CCT2,CCT8,SUGT1,CCT5
7_Member	GO Biological Processes	GO:0090666	scaRNA localization to Cajal body	-4.99287	-3.18406	3/5	1736,10575,10576	DKC1,CCT4,CCT2
7_Member	GO Biological Processes	GO:0090670	RNA localization to Cajal body	-4.99287	-3.18406	3/5	1736,10575,10576	DKC1,CCT4,CCT2
7_Member	GO Biological Processes	GO:0090685	RNA localization to nucleus	-4.99287	-3.18406	3/5	1736,10575,10576	DKC1,CCT4,CCT2
7_Member	GO Biological Processes	GO:0032204	regulation of telomere maintenance	-4.94708	-3.14466	8/104	86,908,1736,10574,10575,10576,10694,22948	ACTL6A,CCT6A,DKC1,CCT7,CCT4,CCT2,CCT8,CCT5
7_Member	GO Biological Processes	GO:0050821	protein stabilization	-4.90222	-3.10542	11/213	908,3320,3326,5300,5434,9675,10574,10575,10576,10694,22948	CCT6A,HSP90AA1,HSP90AB1,PIN1,POLR2E,TTI1,CCT7,CCT4,CCT2,CCT8,CCT5
7_Member	GO Biological Processes	GO:0051973	positive regulation of telomerase activity	-4.64461	-2.87834	5/34	1736,3320,3326,10575,10576	DKC1,HSP90AA1,HSP90AB1,CCT4,CCT2
7_Member	GO Biological Processes	GO:0007339	binding of sperm to zona pellucida	-4.58127	-2.82508	5/35	10574,10575,10576,10694,22948	CCT7,CCT4,CCT2,CCT8,CCT5
7_Member	GO Biological Processes	GO:0008037	cell recognition	-4.13013	-2.4121	8/135	836,10574,10575,10576,10694,22948,23210,55079	CASP3,CCT7,CCT4,CCT2,CCT8,CCT5,JMJD6,FEZF2
7_Member	GO Biological Processes	GO:0051972	regulation of telomerase activity	-3.95001	-2.24498	5/47	1736,3320,3326,10575,10576	DKC1,HSP90AA1,HSP90AB1,CCT4,CCT2
7_Member	GO Biological Processes	GO:0035036	sperm-egg recognition	-3.90583	-2.20816	5/48	10574,10575,10576,10694,22948	CCT7,CCT4,CCT2,CCT8,CCT5
7_Member	Reactome Gene Sets	R-HSA-5620920	Cargo trafficking to the periciliary membrane	-3.77929	-2.09727	5/51	10575,10576,10694,22948,27241	CCT4,CCT2,CCT8,CCT5,BBS9
7_Member	GO Biological Processes	GO:0009988	cell-cell recognition	-3.25272	-1.6444	5/66	10574,10575,10576,10694,22948	CCT7,CCT4,CCT2,CCT8,CCT5
7_Member	GO Biological Processes	GO:0007338	single fertilization	-3.00525	-1.44747	7/153	8546,10007,10574,10575,10576,10694,22948	AP3B1,GNPDA1,CCT7,CCT4,CCT2,CCT8,CCT5
7_Member	GO Biological Processes	GO:0009566	fertilization	-2.44687	-0.985014	7/192	8546,10007,10574,10575,10576,10694,22948	AP3B1,GNPDA1,CCT7,CCT4,CCT2,CCT8,CCT5
8_Summary	Reactome Gene Sets	R-HSA-6798695	Neutrophil degranulation	-12.0425	-9.83915	27/482	210,1432,1460,1915,1938,2665,3312,3320,3326,3615,5036,5269,5683,5689,5701,5702,5708,7414,9961,10159,10383,10576,10694,28988,51719,84514,203068	ALAD,MAPK14,CSNK2B,EEF1A1,EEF2,GDI2,HSPA8,HSP90AA1,HSP90AB1,IMPDH2,PA2G4,SERPINB6,PSMA2,PSMB1,PSMC2,PSMC3,PSMD2,VCL,MVP,ATP6AP2,TUBB4B,CCT2,CCT8,DBNL,CAB39,GHDC,TUBB
8_Member	Reactome Gene Sets	R-HSA-6798695	Neutrophil degranulation	-12.0425	-9.83915	27/482	210,1432,1460,1915,1938,2665,3312,3320,3326,3615,5036,5269,5683,5689,5701,5702,5708,7414,9961,10159,10383,10576,10694,28988,51719,84514,203068	ALAD,MAPK14,CSNK2B,EEF1A1,EEF2,GDI2,HSPA8,HSP90AA1,HSP90AB1,IMPDH2,PA2G4,SERPINB6,PSMA2,PSMB1,PSMC2,PSMC3,PSMD2,VCL,MVP,ATP6AP2,TUBB4B,CCT2,CCT8,DBNL,CAB39,GHDC,TUBB
9_Summary	GO Biological Processes	GO:0016071	mRNA metabolic process	-10.2108	-8.10067	28/623	1736,2107,2935,3312,7737,7812,8161,8546,9130,9652,10419,10768,10914,11340,23070,23210,23404,23708,25980,27336,51645,51690,53918,53938,55696,56931,57703,79084,5431,5434,5437,55746,57122,5518,10625	DKC1,ETF1,GSPT1,HSPA8,RNF113A,CSDE1,COIL,AP3B1,FAM50A,SKIC3,PRMT5,AHCYL1,PAPOLA,EXOSC8,CMTR1,JMJD6,EXOSC2,GSPT2,AAR2,HTATSF1,PPIL1,LSM7,PELO,PPIL3,RBM22,DUS3L,CWC22,WDR77,POLR2B,POLR2E,POLR2H,NUP133,NUP107,PPP2R1A,IVNS1ABP
9_Member	GO Biological Processes	GO:0016071	mRNA metabolic process	-10.2108	-8.10067	28/623	1736,2107,2935,3312,7737,7812,8161,8546,9130,9652,10419,10768,10914,11340,23070,23210,23404,23708,25980,27336,51645,51690,53918,53938,55696,56931,57703,79084	DKC1,ETF1,GSPT1,HSPA8,RNF113A,CSDE1,COIL,AP3B1,FAM50A,SKIC3,PRMT5,AHCYL1,PAPOLA,EXOSC8,CMTR1,JMJD6,EXOSC2,GSPT2,AAR2,HTATSF1,PPIL1,LSM7,PELO,PPIL3,RBM22,DUS3L,CWC22,WDR77
9_Member	Reactome Gene Sets	R-HSA-72203	Processing of Capped Intron-Containing Pre-mRNA	-6.58098	-4.64815	15/285	3312,5431,5434,5437,7737,9130,10914,27336,51645,51690,53938,55696,55746,57122,57703	HSPA8,POLR2B,POLR2E,POLR2H,RNF113A,FAM50A,PAPOLA,HTATSF1,PPIL1,LSM7,PPIL3,RBM22,NUP133,NUP107,CWC22
9_Member	Reactome Gene Sets	R-HSA-72163	mRNA Splicing - Major Pathway	-5.81518	-3.93109	12/207	3312,5431,5434,5437,7737,9130,27336,51645,51690,53938,55696,57703	HSPA8,POLR2B,POLR2E,POLR2H,RNF113A,FAM50A,HTATSF1,PPIL1,LSM7,PPIL3,RBM22,CWC22
9_Member	GO Biological Processes	GO:0006397	mRNA processing	-5.78708	-3.90962	18/467	3312,7737,8161,9130,10419,10768,10914,23070,23210,25980,27336,51645,51690,53938,55696,56931,57703,79084	HSPA8,RNF113A,COIL,FAM50A,PRMT5,AHCYL1,PAPOLA,CMTR1,JMJD6,AAR2,HTATSF1,PPIL1,LSM7,PPIL3,RBM22,DUS3L,CWC22,WDR77
9_Member	Reactome Gene Sets	R-HSA-72172	mRNA Splicing	-5.64342	-3.77967	12/215	3312,5431,5434,5437,7737,9130,27336,51645,51690,53938,55696,57703	HSPA8,POLR2B,POLR2E,POLR2H,RNF113A,FAM50A,HTATSF1,PPIL1,LSM7,PPIL3,RBM22,CWC22
9_Member	GO Biological Processes	GO:0008380	RNA splicing	-5.49336	-3.64495	16/394	3312,5518,7737,8161,9130,10419,10625,23210,25980,27336,51645,51690,53938,55696,57703,79084	HSPA8,PPP2R1A,RNF113A,COIL,FAM50A,PRMT5,IVNS1ABP,JMJD6,AAR2,HTATSF1,PPIL1,LSM7,PPIL3,RBM22,CWC22,WDR77
9_Member	GO Biological Processes	GO:0000377	RNA splicing, via transesterification reactions with bulged adenosine as nucleophile	-4.69027	-2.92059	12/267	3312,7737,8161,10419,25980,27336,51645,51690,53938,55696,57703,79084	HSPA8,RNF113A,COIL,PRMT5,AAR2,HTATSF1,PPIL1,LSM7,PPIL3,RBM22,CWC22,WDR77
9_Member	GO Biological Processes	GO:0000398	mRNA splicing, via spliceosome	-4.69027	-2.92059	12/267	3312,7737,8161,10419,25980,27336,51645,51690,53938,55696,57703,79084	HSPA8,RNF113A,COIL,PRMT5,AAR2,HTATSF1,PPIL1,LSM7,PPIL3,RBM22,CWC22,WDR77
9_Member	GO Biological Processes	GO:0000375	RNA splicing, via transesterification reactions	-4.62671	-2.86157	12/271	3312,7737,8161,10419,25980,27336,51645,51690,53938,55696,57703,79084	HSPA8,RNF113A,COIL,PRMT5,AAR2,HTATSF1,PPIL1,LSM7,PPIL3,RBM22,CWC22,WDR77
9_Member	CORUM	CORUM:351	Spliceosome	-2.49039	-1.02386	6/141	27336,51645,51690,53938,55696,57703	HTATSF1,PPIL1,LSM7,PPIL3,RBM22,CWC22
9_Member	CORUM	CORUM:1181	C complex spliceosome	-2.06642	-0.678567	4/79	51645,53938,55696,57703	PPIL1,PPIL3,RBM22,CWC22
10_Summary	Reactome Gene Sets	R-HSA-379716	Cytosolic tRNA aminoacylation	-10.1865	-8.08259	8/24	833,1615,2617,5917,6301,7453,8565,9255,159,440,2618,2805,5184,5723,29968,2197,6222,6223,7296,11340,23404,56931	CARS1,DARS1,GARS1,RARS1,SARS1,WARS1,YARS1,AIMP1,ADSS2,ASNS,GART,GOT1,PEPD,PSPH,PSAT1,FAU,RPS18,RPS19,TXNRD1,EXOSC8,EXOSC2,DUS3L
10_Member	Reactome Gene Sets	R-HSA-379716	Cytosolic tRNA aminoacylation	-10.1865	-8.08259	8/24	833,1615,2617,5917,6301,7453,8565,9255	CARS1,DARS1,GARS1,RARS1,SARS1,WARS1,YARS1,AIMP1
10_Member	Reactome Gene Sets	R-HSA-379724	tRNA Aminoacylation	-8.04991	-6.04286	8/42	833,1615,2617,5917,6301,7453,8565,9255	CARS1,DARS1,GARS1,RARS1,SARS1,WARS1,YARS1,AIMP1
10_Member	GO Biological Processes	GO:0006418	tRNA aminoacylation for protein translation	-6.76441	-4.82318	7/41	833,1615,2617,5917,6301,7453,8565	CARS1,DARS1,GARS1,RARS1,SARS1,WARS1,YARS1
10_Member	GO Biological Processes	GO:0043038	amino acid activation	-6.54412	-4.6146	7/44	833,1615,2617,5917,6301,7453,8565	CARS1,DARS1,GARS1,RARS1,SARS1,WARS1,YARS1
10_Member	GO Biological Processes	GO:0043039	tRNA aminoacylation	-6.54412	-4.6146	7/44	833,1615,2617,5917,6301,7453,8565	CARS1,DARS1,GARS1,RARS1,SARS1,WARS1,YARS1
10_Member	GO Biological Processes	GO:0006520	amino acid metabolic process	-5.89794	-4.00786	14/281	159,440,833,1615,2617,2618,2805,5184,5723,5917,6301,7453,8565,29968	ADSS2,ASNS,CARS1,DARS1,GARS1,GART,GOT1,PEPD,PSPH,RARS1,SARS1,WARS1,YARS1,PSAT1
10_Member	KEGG Pathway	hsa00970	Aminoacyl-tRNA biosynthesis	-5.31887	-3.48128	7/66	833,1615,2617,5917,6301,7453,8565	CARS1,DARS1,GARS1,RARS1,SARS1,WARS1,YARS1
10_Member	Reactome Gene Sets	R-HSA-2408522	Selenoamino acid metabolism	-4.52043	-2.77034	8/119	1615,2197,5917,6222,6223,6301,7296,9255	DARS1,FAU,RARS1,RPS18,RPS19,SARS1,TXNRD1,AIMP1
10_Member	GO Biological Processes	GO:0006399	tRNA metabolic process	-4.51995	-2.77034	10/193	833,1615,2617,5917,6301,7453,8565,11340,23404,56931	CARS1,DARS1,GARS1,RARS1,SARS1,WARS1,YARS1,EXOSC8,EXOSC2,DUS3L
10_Member	CORUM	CORUM:3040	Multisynthetase complex	-3.79504	-2.11021	3/11	1615,5917,9255	DARS1,RARS1,AIMP1
11_Summary	GO Biological Processes	GO:0051276	chromosome organization	-9.79891	-7.71895	24/477	86,1736,2237,3320,3326,3704,4171,5111,5518,5901,8260,10540,10592,10726,49856,53918,55651,55746,57122,64151,64785,79892,80218,84296,2935,6905,7280,9221,9475,10383,10844,10910,26058,27229,51507,56984,203068,5000,8546,5291,5586,55559	ACTL6A,DKC1,FEN1,HSP90AA1,HSP90AB1,ITPA,MCM2,PCNA,PPP2R1A,RAN,NAA10,DCTN2,SMC2,NUDC,WRAP73,PELO,NHP2,NUP133,NUP107,NCAPG,GINS3,MCMBP,NAA50,GINS4,GSPT1,TBCE,TUBB2A,NOLC1,ROCK2,TUBB4B,TUBGCP2,SUGT1,GIGYF2,TUBGCP4,RTF2,PSMG2,TUBB,ORC4,AP3B1,PIK3CB,PKN2,HAUS7
11_Member	GO Biological Processes	GO:0051276	chromosome organization	-9.79891	-7.71895	24/477	86,1736,2237,3320,3326,3704,4171,5111,5518,5901,8260,10540,10592,10726,49856,53918,55651,55746,57122,64151,64785,79892,80218,84296	ACTL6A,DKC1,FEN1,HSP90AA1,HSP90AB1,ITPA,MCM2,PCNA,PPP2R1A,RAN,NAA10,DCTN2,SMC2,NUDC,WRAP73,PELO,NHP2,NUP133,NUP107,NCAPG,GINS3,MCMBP,NAA50,GINS4
11_Member	GO Biological Processes	GO:0000278	mitotic cell cycle	-7.70366	-5.71213	24/610	2935,4171,5111,5518,5901,6905,7280,9221,9475,10383,10540,10592,10726,10844,10910,26058,27229,49856,51507,56984,64151,64785,80218,203068	GSPT1,MCM2,PCNA,PPP2R1A,RAN,TBCE,TUBB2A,NOLC1,ROCK2,TUBB4B,DCTN2,SMC2,NUDC,TUBGCP2,SUGT1,GIGYF2,TUBGCP4,WRAP73,RTF2,PSMG2,NCAPG,GINS3,NAA50,TUBB
11_Member	GO Biological Processes	GO:1903047	mitotic cell cycle process	-4.60292	-2.84228	17/517	2935,4171,5111,5518,5901,6905,9475,10540,10592,10726,26058,49856,51507,56984,64151,64785,80218	GSPT1,MCM2,PCNA,PPP2R1A,RAN,TBCE,ROCK2,DCTN2,SMC2,NUDC,GIGYF2,WRAP73,RTF2,PSMG2,NCAPG,GINS3,NAA50
11_Member	GO Biological Processes	GO:0000070	mitotic sister chromatid segregation	-3.85166	-2.15733	8/148	5518,5901,10540,10592,10726,49856,64151,80218	PPP2R1A,RAN,DCTN2,SMC2,NUDC,WRAP73,NCAPG,NAA50
11_Member	GO Biological Processes	GO:0000819	sister chromatid segregation	-3.60138	-1.93944	8/161	5518,5901,10540,10592,10726,49856,64151,80218	PPP2R1A,RAN,DCTN2,SMC2,NUDC,WRAP73,NCAPG,NAA50
11_Member	GO Biological Processes	GO:0140014	mitotic nuclear division	-3.42518	-1.79255	8/171	5518,5901,10540,10592,10726,49856,64151,80218	PPP2R1A,RAN,DCTN2,SMC2,NUDC,WRAP73,NCAPG,NAA50
11_Member	GO Biological Processes	GO:0007052	mitotic spindle organization	-2.56418	-1.08158	5/94	5901,6905,10540,10726,49856	RAN,TBCE,DCTN2,NUDC,WRAP73
11_Member	GO Biological Processes	GO:0048285	organelle fission	-2.51578	-1.04195	10/347	5000,5518,5901,8546,10540,10592,10726,49856,64151,80218	ORC4,PPP2R1A,RAN,AP3B1,DCTN2,SMC2,NUDC,WRAP73,NCAPG,NAA50
11_Member	GO Biological Processes	GO:0098813	nuclear chromosome segregation	-2.3686	-0.923303	8/251	5518,5901,10540,10592,10726,49856,64151,80218	PPP2R1A,RAN,DCTN2,SMC2,NUDC,WRAP73,NCAPG,NAA50
11_Member	GO Biological Processes	GO:0000280	nuclear division	-2.2391	-0.82007	9/321	5000,5518,5901,10540,10592,10726,49856,64151,80218	ORC4,PPP2R1A,RAN,DCTN2,SMC2,NUDC,WRAP73,NCAPG,NAA50
11_Member	GO Biological Processes	GO:0051301	cell division	-2.21113	-0.795144	12/509	5000,5291,5586,5901,9475,10592,10726,53918,55559,64151,79892,203068	ORC4,PIK3CB,PKN2,RAN,ROCK2,SMC2,NUDC,PELO,HAUS7,NCAPG,MCMBP,TUBB
11_Member	GO Biological Processes	GO:1902850	microtubule cytoskeleton organization involved in mitosis	-2.01511	-0.638764	5/127	5901,6905,10540,10726,49856	RAN,TBCE,DCTN2,NUDC,WRAP73
12_Summary	GO Biological Processes	GO:0006260	DNA replication	-9.70405	-7.62873	16/196	1854,2237,4171,4673,4999,5000,5111,5425,6240,6241,51507,54107,64785,79892,83743,84296,86,1736,3320,3326,5901,7083,7323,7335,7737,9643,23075,54969,55651,836,1432,2475,26058,28985,55671,57103,5518	DUT,FEN1,MCM2,NAP1L1,ORC2,ORC4,PCNA,POLD2,RRM1,RRM2,RTF2,POLE3,GINS3,MCMBP,GRWD1,GINS4,ACTL6A,DKC1,HSP90AA1,HSP90AB1,RAN,TK1,UBE2D3,UBE2V1,RNF113A,MORF4L2,SWAP70,HPF1,NHP2,CASP3,MAPK14,MTOR,GIGYF2,MCTS1,PPP4R3A,TIGAR,PPP2R1A
12_Member	GO Biological Processes	GO:0006260	DNA replication	-9.70405	-7.62873	16/196	1854,2237,4171,4673,4999,5000,5111,5425,6240,6241,51507,54107,64785,79892,83743,84296	DUT,FEN1,MCM2,NAP1L1,ORC2,ORC4,PCNA,POLD2,RRM1,RRM2,RTF2,POLE3,GINS3,MCMBP,GRWD1,GINS4
12_Member	GO Biological Processes	GO:0006259	DNA metabolic process	-8.77852	-6.7408	29/770	86,1736,1854,2237,3320,3326,4171,4673,4999,5000,5111,5425,5901,6240,6241,7083,7323,7335,7737,9643,23075,51507,54107,54969,55651,64785,79892,83743,84296	ACTL6A,DKC1,DUT,FEN1,HSP90AA1,HSP90AB1,MCM2,NAP1L1,ORC2,ORC4,PCNA,POLD2,RAN,RRM1,RRM2,TK1,UBE2D3,UBE2V1,RNF113A,MORF4L2,SWAP70,RTF2,POLE3,HPF1,NHP2,GINS3,MCMBP,GRWD1,GINS4
12_Member	GO Biological Processes	GO:0006261	DNA-templated DNA replication	-7.91245	-5.91516	12/133	2237,4171,4999,5000,5111,5425,6240,51507,54107,64785,79892,84296	FEN1,MCM2,ORC2,ORC4,PCNA,POLD2,RRM1,RTF2,POLE3,GINS3,MCMBP,GINS4
12_Member	Reactome Gene Sets	R-HSA-69190	DNA strand elongation	-6.12459	-4.2176	6/32	2237,4171,5111,5425,64785,84296	FEN1,MCM2,PCNA,POLD2,GINS3,GINS4
12_Member	GO Biological Processes	GO:0033260	nuclear DNA replication	-5.42456	-3.58024	5/24	2237,4171,5111,51507,64785	FEN1,MCM2,PCNA,RTF2,GINS3
12_Member	GO Biological Processes	GO:0044786	cell cycle DNA replication	-5.33126	-3.49234	5/25	2237,4171,5111,51507,64785	FEN1,MCM2,PCNA,RTF2,GINS3
12_Member	GO Biological Processes	GO:0006974	cellular response to DNA damage stimulus	-4.14165	-2.42057	20/736	86,836,1432,2237,2475,4171,5111,5425,6240,7323,7335,7737,9643,26058,28985,54107,54969,55671,57103,84296	ACTL6A,CASP3,MAPK14,FEN1,MTOR,MCM2,PCNA,POLD2,RRM1,UBE2D3,UBE2V1,RNF113A,MORF4L2,GIGYF2,MCTS1,POLE3,HPF1,PPP4R3A,TIGAR,GINS4
12_Member	GO Biological Processes	GO:1902969	mitotic DNA replication	-3.67337	-2.00604	3/12	4171,51507,64785	MCM2,RTF2,GINS3
12_Member	Reactome Gene Sets	R-HSA-176974	Unwinding of DNA	-3.67337	-2.00604	3/12	4171,64785,84296	MCM2,GINS3,GINS4
12_Member	GO Biological Processes	GO:1900262	regulation of DNA-directed DNA polymerase activity	-3.56269	-1.90695	3/13	5111,64785,84296	PCNA,GINS3,GINS4
12_Member	GO Biological Processes	GO:1900264	positive regulation of DNA-directed DNA polymerase activity	-3.56269	-1.90695	3/13	5111,64785,84296	PCNA,GINS3,GINS4
12_Member	GO Biological Processes	GO:0006275	regulation of DNA replication	-3.30782	-1.68752	7/136	86,4171,5111,5518,54107,64785,84296	ACTL6A,MCM2,PCNA,PPP2R1A,POLE3,GINS3,GINS4
12_Member	GO Biological Processes	GO:0006268	DNA unwinding involved in DNA replication	-2.9213	-1.37801	3/21	4171,64785,84296	MCM2,GINS3,GINS4
12_Member	GO Biological Processes	GO:0090329	regulation of DNA-templated DNA replication	-2.54383	-1.06476	4/58	4171,5111,64785,84296	MCM2,PCNA,GINS3,GINS4
12_Member	GO Biological Processes	GO:0006281	DNA repair	-2.31802	-0.884773	12/493	86,2237,4171,5111,5425,6240,7323,7335,7737,9643,54969,84296	ACTL6A,FEN1,MCM2,PCNA,POLD2,RRM1,UBE2D3,UBE2V1,RNF113A,MORF4L2,HPF1,GINS4
12_Member	WikiPathways	WP4016	DNA IR-damage and cellular response via ATR	-2.02895	-0.646804	4/81	2237,4171,5111,7323	FEN1,MCM2,PCNA,UBE2D3
13_Summary	WikiPathways	WP4022	Pyrimidine metabolism	-9.02863	-6.98666	11/84	1841,1854,5425,5431,5434,5437,6240,6241,7083,7372,54107,203,7296,57103,2475,5111,5894,10592,10419	DTYMK,DUT,POLD2,POLR2B,POLR2E,POLR2H,RRM1,RRM2,TK1,UMPS,POLE3,AK1,TXNRD1,TIGAR,MTOR,PCNA,RAF1,SMC2,PRMT5
13_Member	WikiPathways	WP4022	Pyrimidine metabolism	-9.02863	-6.98666	11/84	1841,1854,5425,5431,5434,5437,6240,6241,7083,7372,54107	DTYMK,DUT,POLD2,POLR2B,POLR2E,POLR2H,RRM1,RRM2,TK1,UMPS,POLE3
13_Member	Reactome Gene Sets	R-HSA-499943	Interconversion of nucleotide di- and triphosphates	-6.30078	-4.38267	6/30	203,1841,1854,6240,6241,7296	AK1,DTYMK,DUT,RRM1,RRM2,TXNRD1
13_Member	GO Biological Processes	GO:0009263	deoxyribonucleotide biosynthetic process	-4.88778	-3.09701	4/15	1841,1854,6240,6241	DTYMK,DUT,RRM1,RRM2
13_Member	GO Biological Processes	GO:0009265	2'-deoxyribonucleotide biosynthetic process	-4.88778	-3.09701	4/15	1841,1854,6240,6241	DTYMK,DUT,RRM1,RRM2
13_Member	GO Biological Processes	GO:0046385	deoxyribose phosphate biosynthetic process	-4.88778	-3.09701	4/15	1841,1854,6240,6241	DTYMK,DUT,RRM1,RRM2
13_Member	KEGG Pathway	hsa00240	Pyrimidine metabolism	-4.57067	-2.81559	6/58	1841,1854,6240,6241,7083,7372	DTYMK,DUT,RRM1,RRM2,TK1,UMPS
13_Member	GO Biological Processes	GO:0009133	nucleoside diphosphate biosynthetic process	-3.56269	-1.90695	3/13	203,1841,7372	AK1,DTYMK,UMPS
13_Member	GO Biological Processes	GO:0009132	nucleoside diphosphate metabolic process	-3.44969	-1.81203	6/92	203,1841,6240,6241,7372,57103	AK1,DTYMK,RRM1,RRM2,UMPS,TIGAR
13_Member	WikiPathways	WP1601	Fluoropyrimidine activity	-3.42252	-1.79155	4/34	6240,6241,7083,7372	RRM1,RRM2,TK1,UMPS
13_Member	WikiPathways	WP4584	Biomarkers for pyrimidine metabolism disorders	-3.36758	-1.74484	3/15	6240,6241,7372	RRM1,RRM2,UMPS
13_Member	GO Biological Processes	GO:0072528	pyrimidine-containing compound biosynthetic process	-3.27934	-1.66834	4/37	1841,1854,2475,7372	DTYMK,DUT,MTOR,UMPS
13_Member	WikiPathways	WP4225	Pyrimidine metabolism and related diseases	-3.19961	-1.60372	3/17	6240,6241,7372	RRM1,RRM2,UMPS
13_Member	GO Biological Processes	GO:0009394	2'-deoxyribonucleotide metabolic process	-3.02854	-1.46724	4/43	1841,1854,6240,6241	DTYMK,DUT,RRM1,RRM2
13_Member	GO Biological Processes	GO:0009185	ribonucleoside diphosphate metabolic process	-3.02542	-1.46553	5/74	203,6240,6241,7372,57103	AK1,RRM1,RRM2,UMPS,TIGAR
13_Member	GO Biological Processes	GO:0009262	deoxyribonucleotide metabolic process	-2.99059	-1.43491	4/44	1841,1854,6240,6241	DTYMK,DUT,RRM1,RRM2
13_Member	GO Biological Processes	GO:0019692	deoxyribose phosphate metabolic process	-2.99059	-1.43491	4/44	1841,1854,6240,6241	DTYMK,DUT,RRM1,RRM2
13_Member	GO Biological Processes	GO:0072527	pyrimidine-containing compound metabolic process	-2.80166	-1.27826	5/83	1841,1854,2475,7083,7372	DTYMK,DUT,MTOR,TK1,UMPS
13_Member	WikiPathways	WP2446	Retinoblastoma gene in cancer	-2.64652	-1.14883	5/90	5111,5894,6240,6241,10592	PCNA,RAF1,RRM1,RRM2,SMC2
13_Member	Reactome Gene Sets	R-HSA-69205	G1/S-Specific Transcription	-2.55255	-1.07113	3/28	5111,6241,7083	PCNA,RRM2,TK1
13_Member	GO Biological Processes	GO:0006221	pyrimidine nucleotide biosynthetic process	-2.38537	-0.939529	3/32	1841,1854,7372	DTYMK,DUT,UMPS
13_Member	Canonical Pathways	M40	PID E2F PATHWAY	-2.18598	-0.774029	4/73	6240,6241,7083,10419	RRM1,RRM2,TK1,PRMT5
14_Summary	Reactome Gene Sets	R-HSA-68877	Mitotic Prometaphase	-8.50657	-6.47724	15/204	1460,3320,5518,7280,10383,10540,10592,10726,10844,27229,55559,55746,57122,64151,203068,10575,10576,10694,22948,27241,5901,6905,49856,1432,402,827,9475,11188,54919,80218	CSNK2B,HSP90AA1,PPP2R1A,TUBB2A,TUBB4B,DCTN2,SMC2,NUDC,TUBGCP2,TUBGCP4,HAUS7,NUP133,NUP107,NCAPG,TUBB,CCT4,CCT2,CCT8,CCT5,BBS9,RAN,TBCE,WRAP73,MAPK14,ARL2,CAPN6,ROCK2,NISCH,DNAAF5,NAA50
14_Member	Reactome Gene Sets	R-HSA-68877	Mitotic Prometaphase	-8.50657	-6.47724	15/204	1460,3320,5518,7280,10383,10540,10592,10726,10844,27229,55559,55746,57122,64151,203068	CSNK2B,HSP90AA1,PPP2R1A,TUBB2A,TUBB4B,DCTN2,SMC2,NUDC,TUBGCP2,TUBGCP4,HAUS7,NUP133,NUP107,NCAPG,TUBB
14_Member	Reactome Gene Sets	R-HSA-380320	Recruitment of NuMA to mitotic centrosomes	-6.29808	-4.38158	9/94	3320,5518,7280,10383,10540,10844,27229,55559,203068	HSP90AA1,PPP2R1A,TUBB2A,TUBB4B,DCTN2,TUBGCP2,TUBGCP4,HAUS7,TUBB
14_Member	Reactome Gene Sets	R-HSA-5617833	Cilium Assembly	-5.94936	-4.05625	12/201	3320,5518,7280,10383,10540,10575,10576,10694,22948,27241,55559,203068	HSP90AA1,PPP2R1A,TUBB2A,TUBB4B,DCTN2,CCT4,CCT2,CCT8,CCT5,BBS9,HAUS7,TUBB
14_Member	Reactome Gene Sets	R-HSA-380270	Recruitment of mitotic centrosome proteins and complexes	-5.72241	-3.85151	8/82	3320,5518,10383,10540,10844,27229,55559,203068	HSP90AA1,PPP2R1A,TUBB4B,DCTN2,TUBGCP2,TUBGCP4,HAUS7,TUBB
14_Member	Reactome Gene Sets	R-HSA-380287	Centrosome maturation	-5.72241	-3.85151	8/82	3320,5518,10383,10540,10844,27229,55559,203068	HSP90AA1,PPP2R1A,TUBB4B,DCTN2,TUBGCP2,TUBGCP4,HAUS7,TUBB
14_Member	GO Biological Processes	GO:0007051	spindle organization	-5.20478	-3.37382	10/161	5518,5901,6905,10540,10726,10844,27229,49856,55559,203068	PPP2R1A,RAN,TBCE,DCTN2,NUDC,TUBGCP2,TUBGCP4,WRAP73,HAUS7,TUBB
14_Member	Reactome Gene Sets	R-HSA-1852241	Organelle biogenesis and maintenance	-4.92707	-3.1266	13/296	1432,3320,5518,7280,10383,10540,10575,10576,10694,22948,27241,55559,203068	MAPK14,HSP90AA1,PPP2R1A,TUBB2A,TUBB4B,DCTN2,CCT4,CCT2,CCT8,CCT5,BBS9,HAUS7,TUBB
14_Member	GO Biological Processes	GO:0000226	microtubule cytoskeleton organization	-4.29814	-2.55933	17/547	402,827,5518,5901,6905,7280,9475,10383,10540,10726,10844,11188,27229,49856,54919,55559,203068	ARL2,CAPN6,PPP2R1A,RAN,TBCE,TUBB2A,ROCK2,TUBB4B,DCTN2,NUDC,TUBGCP2,NISCH,TUBGCP4,WRAP73,DNAAF5,HAUS7,TUBB
14_Member	Reactome Gene Sets	R-HSA-380259	Loss of Nlp from mitotic centrosomes	-4.10439	-2.38839	6/70	3320,5518,10383,10540,55559,203068	HSP90AA1,PPP2R1A,TUBB4B,DCTN2,HAUS7,TUBB
14_Member	Reactome Gene Sets	R-HSA-380284	Loss of proteins required for interphase microtubule organization from the centrosome	-4.10439	-2.38839	6/70	3320,5518,10383,10540,55559,203068	HSP90AA1,PPP2R1A,TUBB4B,DCTN2,HAUS7,TUBB
14_Member	Reactome Gene Sets	R-HSA-8854518	AURKA Activation by TPX2	-4.00205	-2.29504	6/73	3320,5518,10383,10540,55559,203068	HSP90AA1,PPP2R1A,TUBB4B,DCTN2,HAUS7,TUBB
14_Member	GO Biological Processes	GO:0007059	chromosome segregation	-3.70229	-2.02399	12/339	5518,5901,10540,10592,10726,10844,27229,49856,55559,64151,80218,203068	PPP2R1A,RAN,DCTN2,SMC2,NUDC,TUBGCP2,TUBGCP4,WRAP73,HAUS7,NCAPG,NAA50,TUBB
14_Member	Reactome Gene Sets	R-HSA-2565942	Regulation of PLK1 Activity at G2/M Transition	-3.55422	-1.89935	6/88	3320,5518,10383,10540,55559,203068	HSP90AA1,PPP2R1A,TUBB4B,DCTN2,HAUS7,TUBB
14_Member	Reactome Gene Sets	R-HSA-5620912	Anchoring of the basal body to the plasma membrane	-3.30253	-1.68464	6/98	3320,5518,10383,10540,55559,203068	HSP90AA1,PPP2R1A,TUBB4B,DCTN2,HAUS7,TUBB
14_Member	GO Biological Processes	GO:0051225	spindle assembly	-2.46697	-1.00287	5/99	10844,27229,49856,55559,203068	TUBGCP2,TUBGCP4,WRAP73,HAUS7,TUBB
15_Summary	GO Biological Processes	GO:0022411	cellular component disassembly	-8.33604	-6.31495	18/315	2107,2932,2935,3312,3936,5756,6059,8473,8878,9948,11345,23708,28985,53918,57103,64422,83743,139341	ETF1,GSK3B,GSPT1,HSPA8,LCP1,TWF1,ABCE1,OGT,SQSTM1,WDR1,GABARAPL2,GSPT2,MCTS1,PELO,TIGAR,ATG3,GRWD1,FUNDC1
15_Member	GO Biological Processes	GO:0022411	cellular component disassembly	-8.33604	-6.31495	18/315	2107,2932,2935,3312,3936,5756,6059,8473,8878,9948,11345,23708,28985,53918,57103,64422,83743,139341	ETF1,GSK3B,GSPT1,HSPA8,LCP1,TWF1,ABCE1,OGT,SQSTM1,WDR1,GABARAPL2,GSPT2,MCTS1,PELO,TIGAR,ATG3,GRWD1,FUNDC1
15_Member	GO Biological Processes	GO:0032984	protein-containing complex disassembly	-5.01342	-3.1967	9/134	2107,2932,2935,3312,5756,6059,9948,23708,83743	ETF1,GSK3B,GSPT1,HSPA8,TWF1,ABCE1,WDR1,GSPT2,GRWD1
15_Member	GO Biological Processes	GO:0051261	protein depolymerization	-2.14257	-0.737577	3/39	3312,5756,9948	HSPA8,TWF1,WDR1
16_Summary	Reactome Gene Sets	R-HSA-9612973	Autophagy	-8.27409	-6.25908	13/151	1460,1915,2475,3312,3320,3326,7280,7335,8878,10383,11345,64422,139341,8473,28985,53918,57103,9958,5291,9475,2932,6240,8546,23761	CSNK2B,EEF1A1,MTOR,HSPA8,HSP90AA1,HSP90AB1,TUBB2A,UBE2V1,SQSTM1,TUBB4B,GABARAPL2,ATG3,FUNDC1,OGT,MCTS1,PELO,TIGAR,USP15,PIK3CB,ROCK2,GSK3B,RRM1,AP3B1,PISD
16_Member	Reactome Gene Sets	R-HSA-9612973	Autophagy	-8.27409	-6.25908	13/151	1460,1915,2475,3312,3320,3326,7280,7335,8878,10383,11345,64422,139341	CSNK2B,EEF1A1,MTOR,HSPA8,HSP90AA1,HSP90AB1,TUBB2A,UBE2V1,SQSTM1,TUBB4B,GABARAPL2,ATG3,FUNDC1
16_Member	Reactome Gene Sets	R-HSA-1632852	Macroautophagy	-6.81268	-4.86461	11/136	1460,2475,3312,3320,7280,7335,8878,10383,11345,64422,139341	CSNK2B,MTOR,HSPA8,HSP90AA1,TUBB2A,UBE2V1,SQSTM1,TUBB4B,GABARAPL2,ATG3,FUNDC1
16_Member	Reactome Gene Sets	R-HSA-9663891	Selective autophagy	-5.76319	-3.88793	8/81	1460,3312,3320,7280,7335,8878,10383,139341	CSNK2B,HSPA8,HSP90AA1,TUBB2A,UBE2V1,SQSTM1,TUBB4B,FUNDC1
16_Member	GO Biological Processes	GO:1903008	organelle disassembly	-4.97804	-3.17264	8/103	8473,8878,11345,28985,53918,57103,64422,139341	OGT,SQSTM1,GABARAPL2,MCTS1,PELO,TIGAR,ATG3,FUNDC1
16_Member	GO Biological Processes	GO:0000422	autophagy of mitochondrion	-4.75103	-2.97327	6/54	8473,8878,11345,57103,64422,139341	OGT,SQSTM1,GABARAPL2,TIGAR,ATG3,FUNDC1
16_Member	GO Biological Processes	GO:0061726	mitochondrion disassembly	-4.75103	-2.97327	6/54	8473,8878,11345,57103,64422,139341	OGT,SQSTM1,GABARAPL2,TIGAR,ATG3,FUNDC1
16_Member	KEGG Pathway	hsa04137	Mitophagy - animal	-3.07948	-1.50233	5/72	1460,8878,9958,11345,139341	CSNK2B,SQSTM1,USP15,GABARAPL2,FUNDC1
16_Member	GO Biological Processes	GO:0000423	mitophagy	-2.98499	-1.43417	3/20	8473,8878,57103	OGT,SQSTM1,TIGAR
16_Member	GO Biological Processes	GO:0006914	autophagy	-2.86094	-1.33095	10/311	2475,3312,3320,5291,8473,8878,11345,57103,64422,139341	MTOR,HSPA8,HSP90AA1,PIK3CB,OGT,SQSTM1,GABARAPL2,TIGAR,ATG3,FUNDC1
16_Member	GO Biological Processes	GO:0061919	process utilizing autophagic mechanism	-2.86094	-1.33095	10/311	2475,3312,3320,5291,8473,8878,11345,57103,64422,139341	MTOR,HSPA8,HSP90AA1,PIK3CB,OGT,SQSTM1,GABARAPL2,TIGAR,ATG3,FUNDC1
16_Member	GO Biological Processes	GO:0002931	response to ischemia	-2.57143	-1.08707	4/57	5291,8878,9475,57103	PIK3CB,SQSTM1,ROCK2,TIGAR
16_Member	Reactome Gene Sets	R-HSA-5205647	Mitophagy	-2.50837	-1.03742	3/29	1460,8878,139341	CSNK2B,SQSTM1,FUNDC1
16_Member	GO Biological Processes	GO:0007005	mitochondrion organization	-2.21538	-0.798887	11/445	2932,3320,6240,8473,8546,8878,11345,23761,57103,64422,139341	GSK3B,HSP90AA1,RRM1,OGT,AP3B1,SQSTM1,GABARAPL2,PISD,TIGAR,ATG3,FUNDC1
17_Summary	GO Biological Processes	GO:0140694	non-membrane-bounded organelle assembly	-8.25045	-6.23744	18/319	1465,1656,3692,6223,7812,9948,10844,23246,23761,27229,28988,49856,55239,55299,55559,84154,203068,253943	CSRP1,DDX6,EIF6,RPS19,CSDE1,WDR1,TUBGCP2,BOP1,PISD,TUBGCP4,DBNL,WRAP73,OGFOD1,BRIX1,HAUS7,RPF2,TUBB,YTHDF3
17_Member	GO Biological Processes	GO:0140694	non-membrane-bounded organelle assembly	-8.25045	-6.23744	18/319	1465,1656,3692,6223,7812,9948,10844,23246,23761,27229,28988,49856,55239,55299,55559,84154,203068,253943	CSRP1,DDX6,EIF6,RPS19,CSDE1,WDR1,TUBGCP2,BOP1,PISD,TUBGCP4,DBNL,WRAP73,OGFOD1,BRIX1,HAUS7,RPF2,TUBB,YTHDF3
17_Member	GO Biological Processes	GO:0034063	stress granule assembly	-4.02781	-2.31882	4/24	1656,7812,55239,253943	DDX6,CSDE1,OGFOD1,YTHDF3
18_Summary	GO Biological Processes	GO:1903311	regulation of mRNA metabolic process	-8.04207	-6.03699	18/329	1432,3312,6294,7812,8761,9475,9567,10419,10768,10914,11340,23210,23367,23404,26058,57703,79084,253943,3692,23246,23481,55759,161424,2475,2932,3320,5291,5700,5701,5702,5704,5705,5706,6613,10425,79156,160418,55651,1656,1975,9652,51690,1736,53918,2237,7257,440,5300	MAPK14,HSPA8,SAFB,CSDE1,PABPC4,ROCK2,GTPBP1,PRMT5,AHCYL1,PAPOLA,EXOSC8,JMJD6,LARP1,EXOSC2,GIGYF2,CWC22,WDR77,YTHDF3,EIF6,BOP1,PES1,WDR12,NOP9,MTOR,GSK3B,HSP90AA1,PIK3CB,PSMC1,PSMC2,PSMC3,PSMC4,PSMC5,PSMC6,SUMO2,ARIH2,PLEKHF1,TMTC3,NHP2,DDX6,EIF4B,SKIC3,LSM7,DKC1,PELO,FEN1,TSNAX,ASNS,PIN1
18_Member	GO Biological Processes	GO:1903311	regulation of mRNA metabolic process	-8.04207	-6.03699	18/329	1432,3312,6294,7812,8761,9475,9567,10419,10768,10914,11340,23210,23367,23404,26058,57703,79084,253943	MAPK14,HSPA8,SAFB,CSDE1,PABPC4,ROCK2,GTPBP1,PRMT5,AHCYL1,PAPOLA,EXOSC8,JMJD6,LARP1,EXOSC2,GIGYF2,CWC22,WDR77,YTHDF3
18_Member	GO Biological Processes	GO:0000460	maturation of 5.8S rRNA	-7.17584	-5.20838	7/36	3692,11340,23246,23404,23481,55759,161424	EIF6,EXOSC8,BOP1,EXOSC2,PES1,WDR12,NOP9
18_Member	GO Biological Processes	GO:0000466	maturation of 5.8S rRNA from tricistronic rRNA transcript (SSU-rRNA, 5.8S rRNA, LSU-rRNA)	-6.80766	-4.86302	6/25	11340,23246,23404,23481,55759,161424	EXOSC8,BOP1,EXOSC2,PES1,WDR12,NOP9
18_Member	GO Biological Processes	GO:0009896	positive regulation of catabolic process	-6.72309	-4.78355	21/540	2475,2932,3320,5291,5700,5701,5702,5704,5705,5706,6613,9475,9567,10425,11340,23367,23404,26058,79156,160418,253943	MTOR,GSK3B,HSP90AA1,PIK3CB,PSMC1,PSMC2,PSMC3,PSMC4,PSMC5,PSMC6,SUMO2,ROCK2,GTPBP1,ARIH2,EXOSC8,LARP1,EXOSC2,GIGYF2,PLEKHF1,TMTC3,YTHDF3
18_Member	GO Biological Processes	GO:0000469	cleavage involved in rRNA processing	-4.99638	-3.18406	5/29	11340,23246,23404,55651,161424	EXOSC8,BOP1,EXOSC2,NHP2,NOP9
18_Member	Reactome Gene Sets	R-HSA-429914	Deadenylation-dependent mRNA decay	-4.70455	-2.93142	6/55	1656,1975,9652,11340,23404,51690	DDX6,EIF4B,SKIC3,EXOSC8,EXOSC2,LSM7
18_Member	GO Biological Processes	GO:1903313	positive regulation of mRNA metabolic process	-4.46451	-2.7171	9/157	3312,9475,9567,10419,11340,23404,26058,79084,253943	HSPA8,ROCK2,GTPBP1,PRMT5,EXOSC8,EXOSC2,GIGYF2,WDR77,YTHDF3
18_Member	GO Biological Processes	GO:0043487	regulation of RNA stability	-4.31593	-2.57499	10/204	1432,1736,7812,8761,9475,11340,23367,23404,26058,253943	MAPK14,DKC1,CSDE1,PABPC4,ROCK2,EXOSC8,LARP1,EXOSC2,GIGYF2,YTHDF3
18_Member	GO Biological Processes	GO:0061013	regulation of mRNA catabolic process	-4.17593	-2.4528	10/212	1432,7812,8761,9475,9567,11340,23367,23404,26058,253943	MAPK14,CSDE1,PABPC4,ROCK2,GTPBP1,EXOSC8,LARP1,EXOSC2,GIGYF2,YTHDF3
18_Member	KEGG Pathway	hsa03018	RNA degradation	-3.81115	-2.11968	6/79	1656,8761,9652,11340,23404,51690	DDX6,PABPC4,SKIC3,EXOSC8,EXOSC2,LSM7
18_Member	GO Biological Processes	GO:0034427	nuclear-transcribed mRNA catabolic process, exonucleolytic, 3'-5'	-3.79504	-2.11021	3/11	9652,11340,23404	SKIC3,EXOSC8,EXOSC2
18_Member	GO Biological Processes	GO:0043488	regulation of mRNA stability	-3.79276	-2.10887	9/192	1432,7812,8761,9475,11340,23367,23404,26058,253943	MAPK14,CSDE1,PABPC4,ROCK2,EXOSC8,LARP1,EXOSC2,GIGYF2,YTHDF3
18_Member	GO Biological Processes	GO:0071025	RNA surveillance	-3.28067	-1.66834	3/16	11340,23404,53918	EXOSC8,EXOSC2,PELO
18_Member	Reactome Gene Sets	R-HSA-429958	mRNA decay by 3' to 5' exoribonuclease	-3.28067	-1.66834	3/16	9652,11340,23404	SKIC3,EXOSC8,EXOSC2
18_Member	GO Biological Processes	GO:0031331	positive regulation of cellular catabolic process	-3.20245	-1.60372	13/441	2475,2932,5291,6613,9475,9567,10425,11340,23367,23404,26058,79156,253943	MTOR,GSK3B,PIK3CB,SUMO2,ROCK2,GTPBP1,ARIH2,EXOSC8,LARP1,EXOSC2,GIGYF2,PLEKHF1,YTHDF3
18_Member	Reactome Gene Sets	R-HSA-450604	KSRP (KHSRP) binds and destabilizes mRNA	-3.19961	-1.60372	3/17	1432,11340,23404	MAPK14,EXOSC8,EXOSC2
18_Member	GO Biological Processes	GO:0000291	nuclear-transcribed mRNA catabolic process, exonucleolytic	-3.05231	-1.48388	3/19	9652,11340,23404	SKIC3,EXOSC8,EXOSC2
18_Member	GO Biological Processes	GO:0043628	regulatory ncRNA 3'-end processing	-3.05231	-1.48388	3/19	1736,11340,23404	DKC1,EXOSC8,EXOSC2
18_Member	GO Biological Processes	GO:0016075	rRNA catabolic process	-2.98499	-1.43417	3/20	11340,23404,53918	EXOSC8,EXOSC2,PELO
18_Member	GO Biological Processes	GO:0090501	RNA phosphodiester bond hydrolysis	-2.9241	-1.37877	7/158	2237,7257,11340,23246,23404,55651,161424	FEN1,TSNAX,EXOSC8,BOP1,EXOSC2,NHP2,NOP9
18_Member	GO Biological Processes	GO:0061014	positive regulation of mRNA catabolic process	-2.88	-1.34544	6/118	9475,9567,11340,23404,26058,253943	ROCK2,GTPBP1,EXOSC8,EXOSC2,GIGYF2,YTHDF3
18_Member	GO Biological Processes	GO:0016073	snRNA metabolic process	-2.65771	-1.15643	4/54	1736,11340,23404,55651	DKC1,EXOSC8,EXOSC2,NHP2
18_Member	GO Biological Processes	GO:0031123	RNA 3'-end processing	-2.60481	-1.11207	5/92	1736,10768,10914,11340,23404	DKC1,AHCYL1,PAPOLA,EXOSC8,EXOSC2
18_Member	Reactome Gene Sets	R-HSA-380994	ATF4 activates genes in response to endoplasmic reticulum stress	-2.59852	-1.11058	3/27	440,11340,23404	ASNS,EXOSC8,EXOSC2
18_Member	GO Biological Processes	GO:2000113	negative regulation of cellular macromolecule biosynthetic process	-2.49507	-1.02584	9/293	1656,2932,3692,9475,11340,23367,23404,26058,253943	DDX6,GSK3B,EIF6,ROCK2,EXOSC8,LARP1,EXOSC2,GIGYF2,YTHDF3
18_Member	GO Biological Processes	GO:0034249	negative regulation of amide metabolic process	-2.47566	-1.01002	9/295	1656,3692,5300,9475,11340,23367,23404,26058,253943	DDX6,EIF6,PIN1,ROCK2,EXOSC8,LARP1,EXOSC2,GIGYF2,YTHDF3
18_Member	GO Biological Processes	GO:0090305	nucleic acid phosphodiester bond hydrolysis	-2.44216	-0.980864	8/244	2237,7257,11340,23246,23404,53918,55651,161424	FEN1,TSNAX,EXOSC8,BOP1,EXOSC2,PELO,NHP2,NOP9
18_Member	GO Biological Processes	GO:0061157	mRNA destabilization	-2.39338	-0.939529	5/103	9475,11340,23404,26058,253943	ROCK2,EXOSC8,EXOSC2,GIGYF2,YTHDF3
18_Member	Reactome Gene Sets	R-HSA-381042	PERK regulates gene expression	-2.38537	-0.939529	3/32	440,11340,23404	ASNS,EXOSC8,EXOSC2
18_Member	GO Biological Processes	GO:0050779	RNA destabilization	-2.32319	-0.887532	5/107	9475,11340,23404,26058,253943	ROCK2,EXOSC8,EXOSC2,GIGYF2,YTHDF3
18_Member	GO Biological Processes	GO:0017148	negative regulation of translation	-2.20114	-0.787177	8/268	1656,3692,9475,11340,23367,23404,26058,253943	DDX6,EIF6,ROCK2,EXOSC8,LARP1,EXOSC2,GIGYF2,YTHDF3
18_Member	GO Biological Processes	GO:0034661	ncRNA catabolic process	-2.11193	-0.713754	3/40	11340,23404,53918	EXOSC8,EXOSC2,PELO
19_Summary	Reactome Gene Sets	R-HSA-3371556	Cellular response to heat stress	-7.60466	-5.61502	10/89	1915,2475,2932,3312,3320,3326,7266,10808,55746,57122,10576	EEF1A1,MTOR,GSK3B,HSPA8,HSP90AA1,HSP90AB1,DNAJC7,HSPH1,NUP133,NUP107,CCT2
19_Member	Reactome Gene Sets	R-HSA-3371556	Cellular response to heat stress	-7.60466	-5.61502	10/89	1915,2475,2932,3312,3320,3326,7266,10808,55746,57122	EEF1A1,MTOR,GSK3B,HSPA8,HSP90AA1,HSP90AB1,DNAJC7,HSPH1,NUP133,NUP107
19_Member	Reactome Gene Sets	R-HSA-3371453	Regulation of HSF1-mediated heat shock response	-4.13963	-2.41957	6/69	2932,3312,7266,10808,55746,57122	GSK3B,HSPA8,DNAJC7,HSPH1,NUP133,NUP107
19_Member	GO Biological Processes	GO:0051084	'de novo' post-translational protein folding	-3.23449	-1.62853	4/38	3312,7266,10576,10808	HSPA8,DNAJC7,CCT2,HSPH1
19_Member	GO Biological Processes	GO:0006458	'de novo' protein folding	-3.0675	-1.49327	4/42	3312,7266,10576,10808	HSPA8,DNAJC7,CCT2,HSPH1
19_Member	GO Biological Processes	GO:0051085	chaperone cofactor-dependent protein refolding	-2.34721	-0.90943	3/33	3312,7266,10808	HSPA8,DNAJC7,HSPH1
20_Summary	GO Biological Processes	GO:0034655	nucleobase-containing compound catabolic process	-7.43039	-5.44453	16/282	1854,2107,2237,2592,2935,3094,3704,7812,8761,9652,11332,11340,23404,23708,51690,53918,7389	DUT,ETF1,FEN1,GALT,GSPT1,HINT1,ITPA,CSDE1,PABPC4,SKIC3,ACOT7,EXOSC8,EXOSC2,GSPT2,LSM7,PELO,UROD
20_Member	GO Biological Processes	GO:0034655	nucleobase-containing compound catabolic process	-7.43039	-5.44453	16/282	1854,2107,2237,2592,2935,3094,3704,7812,8761,9652,11332,11340,23404,23708,51690,53918	DUT,ETF1,FEN1,GALT,GSPT1,HINT1,ITPA,CSDE1,PABPC4,SKIC3,ACOT7,EXOSC8,EXOSC2,GSPT2,LSM7,PELO
20_Member	GO Biological Processes	GO:0046700	heterocycle catabolic process	-7.40125	-5.41727	17/322	1854,2107,2237,2592,2935,3094,3704,7389,7812,8761,9652,11332,11340,23404,23708,51690,53918	DUT,ETF1,FEN1,GALT,GSPT1,HINT1,ITPA,UROD,CSDE1,PABPC4,SKIC3,ACOT7,EXOSC8,EXOSC2,GSPT2,LSM7,PELO
20_Member	GO Biological Processes	GO:0044270	cellular nitrogen compound catabolic process	-7.36226	-5.3857	17/324	1854,2107,2237,2592,2935,3094,3704,7389,7812,8761,9652,11332,11340,23404,23708,51690,53918	DUT,ETF1,FEN1,GALT,GSPT1,HINT1,ITPA,UROD,CSDE1,PABPC4,SKIC3,ACOT7,EXOSC8,EXOSC2,GSPT2,LSM7,PELO
20_Member	GO Biological Processes	GO:0019439	aromatic compound catabolic process	-7.00604	-5.04573	17/343	1854,2107,2237,2592,2935,3094,3704,7389,7812,8761,9652,11332,11340,23404,23708,51690,53918	DUT,ETF1,FEN1,GALT,GSPT1,HINT1,ITPA,UROD,CSDE1,PABPC4,SKIC3,ACOT7,EXOSC8,EXOSC2,GSPT2,LSM7,PELO
20_Member	GO Biological Processes	GO:1901361	organic cyclic compound catabolic process	-6.54014	-4.61227	17/370	1854,2107,2237,2592,2935,3094,3704,7389,7812,8761,9652,11332,11340,23404,23708,51690,53918	DUT,ETF1,FEN1,GALT,GSPT1,HINT1,ITPA,UROD,CSDE1,PABPC4,SKIC3,ACOT7,EXOSC8,EXOSC2,GSPT2,LSM7,PELO
20_Member	GO Biological Processes	GO:0006401	RNA catabolic process	-6.07512	-4.17125	11/161	2107,2237,2935,7812,8761,9652,11340,23404,23708,51690,53918	ETF1,FEN1,GSPT1,CSDE1,PABPC4,SKIC3,EXOSC8,EXOSC2,GSPT2,LSM7,PELO
20_Member	GO Biological Processes	GO:0000956	nuclear-transcribed mRNA catabolic process	-6.03199	-4.12967	9/101	2107,2935,7812,9652,11340,23404,23708,51690,53918	ETF1,GSPT1,CSDE1,SKIC3,EXOSC8,EXOSC2,GSPT2,LSM7,PELO
20_Member	GO Biological Processes	GO:0006402	mRNA catabolic process	-5.31698	-3.48072	9/123	2107,2935,7812,9652,11340,23404,23708,51690,53918	ETF1,GSPT1,CSDE1,SKIC3,EXOSC8,EXOSC2,GSPT2,LSM7,PELO

## Sheet: Cluster3_Syn2D_high
GroupID	Category	Term	Description	LogP	Log(q-value)	InTerm_InList	Genes	Symbols
1_Summary	GO Biological Processes	GO:0006412	translation	-93.8898	-89.5404	123/375	16,23,327,1654,1939,1964,1968,1973,1977,1981,1982,2058,2193,3376,3646,3735,4141,4677,4686,5188,5610,6122,6124,6125,6128,6129,6130,6132,6133,6134,6135,6138,6139,6141,6142,6143,6147,6154,6156,6158,6159,6160,6161,6164,6168,6187,6188,6189,6191,6201,6202,6203,6205,6206,6207,6208,6209,6210,6217,6218,6224,6228,6231,6232,6238,6897,7284,7407,7818,8661,8662,8663,8664,8667,8890,8891,9045,9349,9669,9801,1010…	AARS1,ABCF1,APEH,DDX3X,EIF2D,EIF1AX,EIF2S3,EIF4A1,EIF4E,EIF4G1,EIF4G2,EPRS1,FARSA,IARS1,EIF3E,KARS1,MARS1,NARS1,NCBP1,GATB,EIF2AK2,RPL3,RPL4,RPL5,RPL6,RPL7,RPL7A,RPL8,RPL9,RPL10,RPL11,RPL15,RPL17,RPL18,RPL18A,RPL19,RPL23A,RPL26,RPL30,RPL28,RPL29,RPL31,RPL32,RPL34,RPL37A,RPS2,RPS3,RPS3A,RPS4X,RPS7,RPS8,RPS9,RPS11,RPS12,RPS13,RPS14,RPS15,RPS15A,RPS16,RPS17,RPS20,RPS23,RPS26,RPS27,RRBP1,TARS1,TUFM,V…
1_Member	GO Biological Processes	GO:0006412	translation	-93.8898	-89.5404	123/375	16,23,327,1654,1939,1964,1968,1973,1977,1981,1982,2058,2193,3376,3646,3735,4141,4677,4686,5188,5610,6122,6124,6125,6128,6129,6130,6132,6133,6134,6135,6138,6139,6141,6142,6143,6147,6154,6156,6158,6159,6160,6161,6164,6168,6187,6188,6189,6191,6201,6202,6203,6205,6206,6207,6208,6209,6210,6217,6218,6224,6228,6231,6232,6238,6897,7284,7407,7818,8661,8662,8663,8664,8667,8890,8891,9045,9349,9669,9801,1010…	AARS1,ABCF1,APEH,DDX3X,EIF2D,EIF1AX,EIF2S3,EIF4A1,EIF4E,EIF4G1,EIF4G2,EPRS1,FARSA,IARS1,EIF3E,KARS1,MARS1,NARS1,NCBP1,GATB,EIF2AK2,RPL3,RPL4,RPL5,RPL6,RPL7,RPL7A,RPL8,RPL9,RPL10,RPL11,RPL15,RPL17,RPL18,RPL18A,RPL19,RPL23A,RPL26,RPL30,RPL28,RPL29,RPL31,RPL32,RPL34,RPL37A,RPS2,RPS3,RPS3A,RPS4X,RPS7,RPS8,RPS9,RPS11,RPS12,RPS13,RPS14,RPS15,RPS15A,RPS16,RPS17,RPS20,RPS23,RPS26,RPS27,RRBP1,TARS1,TUFM,V…
1_Member	Reactome Gene Sets	R-HSA-72766	Translation	-92.7628	-88.7144	111/292	16,327,1964,1968,1973,1977,1981,2058,2193,3376,3646,3735,4141,4677,5018,6122,6124,6125,6128,6129,6130,6132,6133,6134,6135,6138,6139,6141,6142,6143,6147,6154,6156,6158,6159,6160,6161,6164,6168,6187,6188,6189,6191,6201,6202,6203,6205,6206,6207,6208,6209,6210,6217,6218,6224,6228,6231,6232,6728,6729,6897,7284,7407,7818,8661,8662,8663,8664,8667,8890,8891,9045,9349,9669,9801,10102,10240,10884,11222,231…	AARS1,APEH,EIF1AX,EIF2S3,EIF4A1,EIF4E,EIF4G1,EPRS1,FARSA,IARS1,EIF3E,KARS1,MARS1,NARS1,OXA1L,RPL3,RPL4,RPL5,RPL6,RPL7,RPL7A,RPL8,RPL9,RPL10,RPL11,RPL15,RPL17,RPL18,RPL18A,RPL19,RPL23A,RPL26,RPL30,RPL28,RPL29,RPL31,RPL32,RPL34,RPL37A,RPS2,RPS3,RPS3A,RPS4X,RPS7,RPS8,RPS9,RPS11,RPS12,RPS13,RPS14,RPS15,RPS15A,RPS16,RPS17,RPS20,RPS23,RPS26,RPS27,SRP19,SRP54,TARS1,TUFM,VARS1,DAP3,EIF3A,EIF3B,EIF3C,EIF3…
1_Member	GO Biological Processes	GO:0043043	peptide biosynthetic process	-89.5812	-85.7088	123/403	16,23,327,1654,1939,1964,1968,1973,1977,1981,1982,2058,2193,3376,3646,3735,4141,4677,4686,5188,5610,6122,6124,6125,6128,6129,6130,6132,6133,6134,6135,6138,6139,6141,6142,6143,6147,6154,6156,6158,6159,6160,6161,6164,6168,6187,6188,6189,6191,6201,6202,6203,6205,6206,6207,6208,6209,6210,6217,6218,6224,6228,6231,6232,6238,6897,7284,7407,7818,8661,8662,8663,8664,8667,8890,8891,9045,9349,9669,9801,1010…	AARS1,ABCF1,APEH,DDX3X,EIF2D,EIF1AX,EIF2S3,EIF4A1,EIF4E,EIF4G1,EIF4G2,EPRS1,FARSA,IARS1,EIF3E,KARS1,MARS1,NARS1,NCBP1,GATB,EIF2AK2,RPL3,RPL4,RPL5,RPL6,RPL7,RPL7A,RPL8,RPL9,RPL10,RPL11,RPL15,RPL17,RPL18,RPL18A,RPL19,RPL23A,RPL26,RPL30,RPL28,RPL29,RPL31,RPL32,RPL34,RPL37A,RPS2,RPS3,RPS3A,RPS4X,RPS7,RPS8,RPS9,RPS11,RPS12,RPS13,RPS14,RPS15,RPS15A,RPS16,RPS17,RPS20,RPS23,RPS26,RPS27,RRBP1,TARS1,TUFM,V…
1_Member	GO Biological Processes	GO:0043604	amide biosynthetic process	-89.3274	-85.58	136/521	16,23,31,327,1654,1738,1939,1964,1968,1973,1977,1981,1982,2058,2181,2182,2193,2629,3376,3646,3735,4141,4594,4677,4686,5160,5162,5188,5610,6122,6124,6125,6128,6129,6130,6132,6133,6134,6135,6138,6139,6141,6142,6143,6147,6154,6156,6158,6159,6160,6161,6164,6168,6187,6188,6189,6191,6201,6202,6203,6205,6206,6207,6208,6209,6210,6217,6218,6224,6228,6231,6232,6238,6576,6897,7284,7407,7818,8661,8662,8663,8…	AARS1,ABCF1,ACACA,APEH,DDX3X,DLD,EIF2D,EIF1AX,EIF2S3,EIF4A1,EIF4E,EIF4G1,EIF4G2,EPRS1,ACSL3,ACSL4,FARSA,GBA1,IARS1,EIF3E,KARS1,MARS1,MMUT,NARS1,NCBP1,PDHA1,PDHB,GATB,EIF2AK2,RPL3,RPL4,RPL5,RPL6,RPL7,RPL7A,RPL8,RPL9,RPL10,RPL11,RPL15,RPL17,RPL18,RPL18A,RPL19,RPL23A,RPL26,RPL30,RPL28,RPL29,RPL31,RPL32,RPL34,RPL37A,RPS2,RPS3,RPS3A,RPS4X,RPS7,RPS8,RPS9,RPS11,RPS12,RPS13,RPS14,RPS15,RPS15A,RPS16,RPS17…
1_Member	GO Biological Processes	GO:0006518	peptide metabolic process	-80.9002	-77.2497	130/536	16,23,327,1512,1514,1522,1654,1939,1964,1968,1973,1977,1981,1982,2058,2193,2879,2936,3376,3416,3646,3735,4141,4677,4686,5188,5610,6122,6124,6125,6128,6129,6130,6132,6133,6134,6135,6138,6139,6141,6142,6143,6147,6154,6156,6158,6159,6160,6161,6164,6168,6187,6188,6189,6191,6201,6202,6203,6205,6206,6207,6208,6209,6210,6217,6218,6224,6228,6231,6232,6238,6897,7284,7407,7818,8661,8662,8663,8664,8667,8890…	AARS1,ABCF1,APEH,CTSH,CTSL,CTSZ,DDX3X,EIF2D,EIF1AX,EIF2S3,EIF4A1,EIF4E,EIF4G1,EIF4G2,EPRS1,FARSA,GPX4,GSR,IARS1,IDE,EIF3E,KARS1,MARS1,NARS1,NCBP1,GATB,EIF2AK2,RPL3,RPL4,RPL5,RPL6,RPL7,RPL7A,RPL8,RPL9,RPL10,RPL11,RPL15,RPL17,RPL18,RPL18A,RPL19,RPL23A,RPL26,RPL30,RPL28,RPL29,RPL31,RPL32,RPL34,RPL37A,RPS2,RPS3,RPS3A,RPS4X,RPS7,RPS8,RPS9,RPS11,RPS12,RPS13,RPS14,RPS15,RPS15A,RPS16,RPS17,RPS20,RPS23,RP…
1_Member	GO Biological Processes	GO:0034645	cellular macromolecule biosynthetic process	-72.6249	-69.0536	143/770	16,23,34,178,207,327,1654,1939,1964,1968,1973,1977,1981,1982,2058,2135,2193,2673,2683,2801,3376,3646,3735,4124,4141,4677,4686,4864,5188,5495,5610,6122,6124,6125,6128,6129,6130,6132,6133,6134,6135,6138,6139,6141,6142,6143,6147,6154,6156,6158,6159,6160,6161,6164,6168,6187,6188,6189,6191,6201,6202,6203,6205,6206,6207,6208,6209,6210,6217,6218,6224,6228,6231,6232,6238,6897,7284,7407,7818,8661,8662,866…	AARS1,ABCF1,ACADM,AGL,AKT1,APEH,DDX3X,EIF2D,EIF1AX,EIF2S3,EIF4A1,EIF4E,EIF4G1,EIF4G2,EPRS1,EXTL2,FARSA,GFPT1,B4GALT1,GOLGA2,IARS1,EIF3E,KARS1,MAN2A1,MARS1,NARS1,NCBP1,NPC1,GATB,PPM1B,EIF2AK2,RPL3,RPL4,RPL5,RPL6,RPL7,RPL7A,RPL8,RPL9,RPL10,RPL11,RPL15,RPL17,RPL18,RPL18A,RPL19,RPL23A,RPL26,RPL30,RPL28,RPL29,RPL31,RPL32,RPL34,RPL37A,RPS2,RPS3,RPS3A,RPS4X,RPS7,RPS8,RPS9,RPS11,RPS12,RPS13,RPS14,RPS15,R…
1_Member	Reactome Gene Sets	R-HSA-8953854	Metabolism of RNA	-66.4161	-62.9117	132/716	207,902,988,1022,1477,1478,1653,1655,1973,1977,1981,2058,2521,3028,3185,3187,3188,3190,4670,4686,4691,4904,5093,5094,5356,5430,5693,5707,5709,5710,5976,6122,6124,6125,6128,6129,6130,6132,6133,6134,6135,6138,6139,6141,6142,6143,6147,6154,6156,6158,6159,6160,6161,6164,6168,6187,6188,6189,6191,6201,6202,6203,6205,6206,6207,6208,6209,6210,6217,6218,6224,6228,6231,6232,6426,6427,6428,6430,6431,6829,73…	AKT1,CCNH,CDC5L,CDK7,CSTF1,CSTF2,DDX1,DDX5,EIF4A1,EIF4E,EIF4G1,EPRS1,FUS,HSD17B10,HNRNPF,HNRNPH1,HNRNPH2,HNRNPK,HNRNPM,NCBP1,NCL,YBX1,PCBP1,PCBP2,PLRG1,POLR2A,PSMB5,PSMD1,PSMD3,PSMD4,UPF1,RPL3,RPL4,RPL5,RPL6,RPL7,RPL7A,RPL8,RPL9,RPL10,RPL11,RPL15,RPL17,RPL18,RPL18A,RPL19,RPL23A,RPL26,RPL30,RPL28,RPL29,RPL31,RPL32,RPL34,RPL37A,RPS2,RPS3,RPS3A,RPS4X,RPS7,RPS8,RPS9,RPS11,RPS12,RPS13,RPS14,RPS15,RPS1…
1_Member	Reactome Gene Sets	R-HSA-72613	Eukaryotic Translation Initiation	-61.9343	-58.5391	62/120	1964,1968,1973,1977,1981,3646,6122,6124,6125,6128,6129,6130,6132,6133,6134,6135,6138,6139,6141,6142,6143,6147,6154,6156,6158,6159,6160,6161,6164,6168,6187,6188,6189,6191,6201,6202,6203,6205,6206,6207,6208,6209,6210,6217,6218,6224,6228,6231,6232,8661,8662,8663,8664,8667,8890,8891,9045,9349,9669,26986,27335,51386	EIF1AX,EIF2S3,EIF4A1,EIF4E,EIF4G1,EIF3E,RPL3,RPL4,RPL5,RPL6,RPL7,RPL7A,RPL8,RPL9,RPL10,RPL11,RPL15,RPL17,RPL18,RPL18A,RPL19,RPL23A,RPL26,RPL30,RPL28,RPL29,RPL31,RPL32,RPL34,RPL37A,RPS2,RPS3,RPS3A,RPS4X,RPS7,RPS8,RPS9,RPS11,RPS12,RPS13,RPS14,RPS15,RPS15A,RPS16,RPS17,RPS20,RPS23,RPS26,RPS27,EIF3A,EIF3B,EIF3C,EIF3D,EIF3H,EIF2B4,EIF2B3,RPL14,RPL23,EIF5B,PABPC1,EIF3K,EIF3L
1_Member	Reactome Gene Sets	R-HSA-72737	Cap-dependent Translation Initiation	-61.9343	-58.5391	62/120	1964,1968,1973,1977,1981,3646,6122,6124,6125,6128,6129,6130,6132,6133,6134,6135,6138,6139,6141,6142,6143,6147,6154,6156,6158,6159,6160,6161,6164,6168,6187,6188,6189,6191,6201,6202,6203,6205,6206,6207,6208,6209,6210,6217,6218,6224,6228,6231,6232,8661,8662,8663,8664,8667,8890,8891,9045,9349,9669,26986,27335,51386	EIF1AX,EIF2S3,EIF4A1,EIF4E,EIF4G1,EIF3E,RPL3,RPL4,RPL5,RPL6,RPL7,RPL7A,RPL8,RPL9,RPL10,RPL11,RPL15,RPL17,RPL18,RPL18A,RPL19,RPL23A,RPL26,RPL30,RPL28,RPL29,RPL31,RPL32,RPL34,RPL37A,RPS2,RPS3,RPS3A,RPS4X,RPS7,RPS8,RPS9,RPS11,RPS12,RPS13,RPS14,RPS15,RPS15A,RPS16,RPS17,RPS20,RPS23,RPS26,RPS27,EIF3A,EIF3B,EIF3C,EIF3D,EIF3H,EIF2B4,EIF2B3,RPL14,RPL23,EIF5B,PABPC1,EIF3K,EIF3L
1_Member	Reactome Gene Sets	R-HSA-156827	L13a-mediated translational silencing of Ceruloplasmin expression	-59.6112	-56.2617	59/112	1964,1968,1973,1977,1981,3646,6122,6124,6125,6128,6129,6130,6132,6133,6134,6135,6138,6139,6141,6142,6143,6147,6154,6156,6158,6159,6160,6161,6164,6168,6187,6188,6189,6191,6201,6202,6203,6205,6206,6207,6208,6209,6210,6217,6218,6224,6228,6231,6232,8661,8662,8663,8664,8667,9045,9349,26986,27335,51386	EIF1AX,EIF2S3,EIF4A1,EIF4E,EIF4G1,EIF3E,RPL3,RPL4,RPL5,RPL6,RPL7,RPL7A,RPL8,RPL9,RPL10,RPL11,RPL15,RPL17,RPL18,RPL18A,RPL19,RPL23A,RPL26,RPL30,RPL28,RPL29,RPL31,RPL32,RPL34,RPL37A,RPS2,RPS3,RPS3A,RPS4X,RPS7,RPS8,RPS9,RPS11,RPS12,RPS13,RPS14,RPS15,RPS15A,RPS16,RPS17,RPS20,RPS23,RPS26,RPS27,EIF3A,EIF3B,EIF3C,EIF3D,EIF3H,RPL14,RPL23,PABPC1,EIF3K,EIF3L
1_Member	Reactome Gene Sets	R-HSA-72706	GTP hydrolysis and joining of the 60S ribosomal subunit	-59.3023	-55.9942	59/113	1964,1968,1973,1977,1981,3646,6122,6124,6125,6128,6129,6130,6132,6133,6134,6135,6138,6139,6141,6142,6143,6147,6154,6156,6158,6159,6160,6161,6164,6168,6187,6188,6189,6191,6201,6202,6203,6205,6206,6207,6208,6209,6210,6217,6218,6224,6228,6231,6232,8661,8662,8663,8664,8667,9045,9349,9669,27335,51386	EIF1AX,EIF2S3,EIF4A1,EIF4E,EIF4G1,EIF3E,RPL3,RPL4,RPL5,RPL6,RPL7,RPL7A,RPL8,RPL9,RPL10,RPL11,RPL15,RPL17,RPL18,RPL18A,RPL19,RPL23A,RPL26,RPL30,RPL28,RPL29,RPL31,RPL32,RPL34,RPL37A,RPS2,RPS3,RPS3A,RPS4X,RPS7,RPS8,RPS9,RPS11,RPS12,RPS13,RPS14,RPS15,RPS15A,RPS16,RPS17,RPS20,RPS23,RPS26,RPS27,EIF3A,EIF3B,EIF3C,EIF3D,EIF3H,RPL14,RPL23,EIF5B,EIF3K,EIF3L
1_Member	GO Biological Processes	GO:0002181	cytoplasmic translation	-57.9499	-54.6796	60/123	1939,1968,1973,1981,3646,4686,6122,6124,6125,6128,6129,6130,6132,6133,6134,6135,6138,6139,6141,6142,6143,6147,6154,6156,6158,6159,6160,6161,6164,6168,6187,6188,6189,6191,6201,6202,6203,6205,6206,6207,6208,6209,6210,6217,6218,6224,6228,6231,6232,8661,8662,8663,8664,8667,8891,9045,9349,10399,27335,51386	EIF2D,EIF2S3,EIF4A1,EIF4G1,EIF3E,NCBP1,RPL3,RPL4,RPL5,RPL6,RPL7,RPL7A,RPL8,RPL9,RPL10,RPL11,RPL15,RPL17,RPL18,RPL18A,RPL19,RPL23A,RPL26,RPL30,RPL28,RPL29,RPL31,RPL32,RPL34,RPL37A,RPS2,RPS3,RPS3A,RPS4X,RPS7,RPS8,RPS9,RPS11,RPS12,RPS13,RPS14,RPS15,RPS15A,RPS16,RPS17,RPS20,RPS23,RPS26,RPS27,EIF3A,EIF3B,EIF3C,EIF3D,EIF3H,EIF2B3,RPL14,RPL23,RACK1,EIF3K,EIF3L
1_Member	Reactome Gene Sets	R-HSA-72689	Formation of a pool of free 40S subunits	-54.7287	-51.4931	54/102	1964,3646,6122,6124,6125,6128,6129,6130,6132,6133,6134,6135,6138,6139,6141,6142,6143,6147,6154,6156,6158,6159,6160,6161,6164,6168,6187,6188,6189,6191,6201,6202,6203,6205,6206,6207,6208,6209,6210,6217,6218,6224,6228,6231,6232,8661,8662,8663,8664,8667,9045,9349,27335,51386	EIF1AX,EIF3E,RPL3,RPL4,RPL5,RPL6,RPL7,RPL7A,RPL8,RPL9,RPL10,RPL11,RPL15,RPL17,RPL18,RPL18A,RPL19,RPL23A,RPL26,RPL30,RPL28,RPL29,RPL31,RPL32,RPL34,RPL37A,RPS2,RPS3,RPS3A,RPS4X,RPS7,RPS8,RPS9,RPS11,RPS12,RPS13,RPS14,RPS15,RPS15A,RPS16,RPS17,RPS20,RPS23,RPS26,RPS27,EIF3A,EIF3B,EIF3C,EIF3D,EIF3H,RPL14,RPL23,EIF3K,EIF3L
1_Member	Reactome Gene Sets	R-HSA-168255	Influenza Infection	-51.4034	-48.2001	61/157	142,293,2926,3836,3837,3838,3839,3840,3843,5430,5610,5611,6122,6124,6125,6128,6129,6130,6132,6133,6134,6135,6138,6139,6141,6142,6143,6147,6154,6156,6158,6159,6160,6161,6164,6168,6187,6188,6189,6191,6201,6202,6203,6205,6206,6207,6208,6209,6210,6217,6218,6224,6228,6231,6232,7514,9045,9349,9818,9972,10762	PARP1,SLC25A6,GRSF1,KPNA1,KPNB1,KPNA2,KPNA3,KPNA4,IPO5,POLR2A,EIF2AK2,DNAJC3,RPL3,RPL4,RPL5,RPL6,RPL7,RPL7A,RPL8,RPL9,RPL10,RPL11,RPL15,RPL17,RPL18,RPL18A,RPL19,RPL23A,RPL26,RPL30,RPL28,RPL29,RPL31,RPL32,RPL34,RPL37A,RPS2,RPS3,RPS3A,RPS4X,RPS7,RPS8,RPS9,RPS11,RPS12,RPS13,RPS14,RPS15,RPS15A,RPS16,RPS17,RPS20,RPS23,RPS26,RPS27,XPO1,RPL14,RPL23,NUP58,NUP153,NUP50
1_Member	Reactome Gene Sets	R-HSA-975956	Nonsense Mediated Decay (NMD) independent of the Exon Junction Complex (EJC)	-48.635	-45.4616	49/96	1981,4686,5976,6122,6124,6125,6128,6129,6130,6132,6133,6134,6135,6138,6139,6141,6142,6143,6147,6154,6156,6158,6159,6160,6161,6164,6168,6187,6188,6189,6191,6201,6202,6203,6205,6206,6207,6208,6209,6210,6217,6218,6224,6228,6231,6232,9045,9349,26986	EIF4G1,NCBP1,UPF1,RPL3,RPL4,RPL5,RPL6,RPL7,RPL7A,RPL8,RPL9,RPL10,RPL11,RPL15,RPL17,RPL18,RPL18A,RPL19,RPL23A,RPL26,RPL30,RPL28,RPL29,RPL31,RPL32,RPL34,RPL37A,RPS2,RPS3,RPS3A,RPS4X,RPS7,RPS8,RPS9,RPS11,RPS12,RPS13,RPS14,RPS15,RPS15A,RPS16,RPS17,RPS20,RPS23,RPS26,RPS27,RPL14,RPL23,PABPC1
1_Member	Reactome Gene Sets	R-HSA-2408522	Selenoamino acid metabolism	-48.5253	-45.38	53/119	1491,2058,2936,3376,3735,4141,6122,6124,6125,6128,6129,6130,6132,6133,6134,6135,6138,6139,6141,6142,6143,6147,6154,6156,6158,6159,6160,6161,6164,6168,6187,6188,6189,6191,6201,6202,6203,6205,6206,6207,6208,6209,6210,6217,6218,6224,6228,6231,6232,9045,9349,22928,51520	CTH,EPRS1,GSR,IARS1,KARS1,MARS1,RPL3,RPL4,RPL5,RPL6,RPL7,RPL7A,RPL8,RPL9,RPL10,RPL11,RPL15,RPL17,RPL18,RPL18A,RPL19,RPL23A,RPL26,RPL30,RPL28,RPL29,RPL31,RPL32,RPL34,RPL37A,RPS2,RPS3,RPS3A,RPS4X,RPS7,RPS8,RPS9,RPS11,RPS12,RPS13,RPS14,RPS15,RPS15A,RPS16,RPS17,RPS20,RPS23,RPS26,RPS27,RPL14,RPL23,SEPHS2,LARS1
1_Member	CORUM	CORUM:306	Ribosome, cytoplasmic	-47.2918	-44.1951	45/80	6122,6124,6125,6128,6129,6130,6132,6133,6134,6135,6138,6139,6141,6142,6143,6147,6154,6156,6158,6159,6160,6161,6164,6168,6187,6188,6189,6191,6201,6202,6203,6205,6206,6207,6208,6209,6210,6217,6218,6224,6228,6231,6232,9045,9349	RPL3,RPL4,RPL5,RPL6,RPL7,RPL7A,RPL8,RPL9,RPL10,RPL11,RPL15,RPL17,RPL18,RPL18A,RPL19,RPL23A,RPL26,RPL30,RPL28,RPL29,RPL31,RPL32,RPL34,RPL37A,RPS2,RPS3,RPS3A,RPS4X,RPS7,RPS8,RPS9,RPS11,RPS12,RPS13,RPS14,RPS15,RPS15A,RPS16,RPS17,RPS20,RPS23,RPS26,RPS27,RPL14,RPL23
1_Member	Reactome Gene Sets	R-HSA-192823	Viral mRNA Translation	-47.2893	-44.1951	47/90	2926,5611,6122,6124,6125,6128,6129,6130,6132,6133,6134,6135,6138,6139,6141,6142,6143,6147,6154,6156,6158,6159,6160,6161,6164,6168,6187,6188,6189,6191,6201,6202,6203,6205,6206,6207,6208,6209,6210,6217,6218,6224,6228,6231,6232,9045,9349	GRSF1,DNAJC3,RPL3,RPL4,RPL5,RPL6,RPL7,RPL7A,RPL8,RPL9,RPL10,RPL11,RPL15,RPL17,RPL18,RPL18A,RPL19,RPL23A,RPL26,RPL30,RPL28,RPL29,RPL31,RPL32,RPL34,RPL37A,RPS2,RPS3,RPS3A,RPS4X,RPS7,RPS8,RPS9,RPS11,RPS12,RPS13,RPS14,RPS15,RPS15A,RPS16,RPS17,RPS20,RPS23,RPS26,RPS27,RPL14,RPL23
1_Member	CORUM	CORUM:3055	Nop56p-associated pre-rRNA complex	-46.4046	-43.3338	49/104	292,4670,4691,4904,6122,6124,6125,6128,6129,6130,6132,6133,6134,6135,6138,6139,6141,6142,6143,6147,6154,6156,6158,6159,6160,6161,6168,6187,6189,6201,6202,6203,6205,6206,6207,6208,6209,6210,6217,6218,6228,7284,7307,9045,9349,10514,10642,11338,55681	SLC25A5,HNRNPM,NCL,YBX1,RPL3,RPL4,RPL5,RPL6,RPL7,RPL7A,RPL8,RPL9,RPL10,RPL11,RPL15,RPL17,RPL18,RPL18A,RPL19,RPL23A,RPL26,RPL30,RPL28,RPL29,RPL31,RPL32,RPL37A,RPS2,RPS3A,RPS7,RPS8,RPS9,RPS11,RPS12,RPS13,RPS14,RPS15,RPS15A,RPS16,RPS17,RPS23,TUFM,U2AF1,RPL14,RPL23,MYBBP1A,IGF2BP1,U2AF2,SCYL2
1_Member	WikiPathways	WP477	Cytoplasmic ribosomal proteins	-46.3164	-43.2679	46/88	6122,6124,6125,6128,6129,6130,6132,6133,6134,6135,6138,6139,6141,6142,6143,6147,6154,6156,6158,6159,6160,6161,6164,6168,6187,6188,6189,6191,6201,6202,6203,6205,6206,6207,6208,6209,6210,6217,6218,6224,6228,6231,6232,9045,9349,9801	RPL3,RPL4,RPL5,RPL6,RPL7,RPL7A,RPL8,RPL9,RPL10,RPL11,RPL15,RPL17,RPL18,RPL18A,RPL19,RPL23A,RPL26,RPL30,RPL28,RPL29,RPL31,RPL32,RPL34,RPL37A,RPS2,RPS3,RPS3A,RPS4X,RPS7,RPS8,RPS9,RPS11,RPS12,RPS13,RPS14,RPS15,RPS15A,RPS16,RPS17,RPS20,RPS23,RPS26,RPS27,RPL14,RPL23,MRPL19
1_Member	KEGG Pathway	hsa03010	Ribosome	-45.5824	-42.5551	58/167	6122,6124,6125,6128,6129,6130,6132,6133,6134,6135,6138,6139,6141,6142,6143,6147,6154,6156,6158,6159,6160,6161,6164,6168,6187,6188,6189,6191,6201,6202,6203,6205,6206,6207,6208,6209,6210,6217,6218,6224,6228,6231,6232,9045,9349,9801,11222,28998,29088,29093,51073,51116,54948,64928,65005,65008,124995,219927	RPL3,RPL4,RPL5,RPL6,RPL7,RPL7A,RPL8,RPL9,RPL10,RPL11,RPL15,RPL17,RPL18,RPL18A,RPL19,RPL23A,RPL26,RPL30,RPL28,RPL29,RPL31,RPL32,RPL34,RPL37A,RPS2,RPS3,RPS3A,RPS4X,RPS7,RPS8,RPS9,RPS11,RPS12,RPS13,RPS14,RPS15,RPS15A,RPS16,RPS17,RPS20,RPS23,RPS26,RPS27,RPL14,RPL23,MRPL19,MRPL3,MRPL13,MRPL15,MRPL22,MRPL4,MRPS2,MRPL16,MRPL14,MRPL9,MRPL1,MRPL10,MRPL21
1_Member	Reactome Gene Sets	R-HSA-9633012	Response of EIF2AK4 (GCN2) to amino acid deficiency	-45.432	-42.4249	48/102	1968,6122,6124,6125,6128,6129,6130,6132,6133,6134,6135,6138,6139,6141,6142,6143,6147,6154,6156,6158,6159,6160,6161,6164,6168,6187,6188,6189,6191,6201,6202,6203,6205,6206,6207,6208,6209,6210,6217,6218,6224,6228,6231,6232,9045,9349,10985,440275	EIF2S3,RPL3,RPL4,RPL5,RPL6,RPL7,RPL7A,RPL8,RPL9,RPL10,RPL11,RPL15,RPL17,RPL18,RPL18A,RPL19,RPL23A,RPL26,RPL30,RPL28,RPL29,RPL31,RPL32,RPL34,RPL37A,RPS2,RPS3,RPS3A,RPS4X,RPS7,RPS8,RPS9,RPS11,RPS12,RPS13,RPS14,RPS15,RPS15A,RPS16,RPS17,RPS20,RPS23,RPS26,RPS27,RPL14,RPL23,GCN1,EIF2AK4
1_Member	Reactome Gene Sets	R-HSA-927802	Nonsense-Mediated Decay (NMD)	-44.9089	-41.9396	50/116	1981,4686,5976,6122,6124,6125,6128,6129,6130,6132,6133,6134,6135,6138,6139,6141,6142,6143,6147,6154,6156,6158,6159,6160,6161,6164,6168,6187,6188,6189,6191,6201,6202,6203,6205,6206,6207,6208,6209,6210,6217,6218,6224,6228,6231,6232,9045,9349,26986,55802	EIF4G1,NCBP1,UPF1,RPL3,RPL4,RPL5,RPL6,RPL7,RPL7A,RPL8,RPL9,RPL10,RPL11,RPL15,RPL17,RPL18,RPL18A,RPL19,RPL23A,RPL26,RPL30,RPL28,RPL29,RPL31,RPL32,RPL34,RPL37A,RPS2,RPS3,RPS3A,RPS4X,RPS7,RPS8,RPS9,RPS11,RPS12,RPS13,RPS14,RPS15,RPS15A,RPS16,RPS17,RPS20,RPS23,RPS26,RPS27,RPL14,RPL23,PABPC1,DCP1A
1_Member	Reactome Gene Sets	R-HSA-975957	Nonsense Mediated Decay (NMD) enhanced by the Exon Junction Complex (EJC)	-44.9089	-41.9396	50/116	1981,4686,5976,6122,6124,6125,6128,6129,6130,6132,6133,6134,6135,6138,6139,6141,6142,6143,6147,6154,6156,6158,6159,6160,6161,6164,6168,6187,6188,6189,6191,6201,6202,6203,6205,6206,6207,6208,6209,6210,6217,6218,6224,6228,6231,6232,9045,9349,26986,55802	EIF4G1,NCBP1,UPF1,RPL3,RPL4,RPL5,RPL6,RPL7,RPL7A,RPL8,RPL9,RPL10,RPL11,RPL15,RPL17,RPL18,RPL18A,RPL19,RPL23A,RPL26,RPL30,RPL28,RPL29,RPL31,RPL32,RPL34,RPL37A,RPS2,RPS3,RPS3A,RPS4X,RPS7,RPS8,RPS9,RPS11,RPS12,RPS13,RPS14,RPS15,RPS15A,RPS16,RPS17,RPS20,RPS23,RPS26,RPS27,RPL14,RPL23,PABPC1,DCP1A
1_Member	Reactome Gene Sets	R-HSA-168273	Influenza Viral RNA Transcription and Replication	-44.7697	-41.8181	53/136	142,2926,3843,5430,5611,6122,6124,6125,6128,6129,6130,6132,6133,6134,6135,6138,6139,6141,6142,6143,6147,6154,6156,6158,6159,6160,6161,6164,6168,6187,6188,6189,6191,6201,6202,6203,6205,6206,6207,6208,6209,6210,6217,6218,6224,6228,6231,6232,9045,9349,9818,9972,10762	PARP1,GRSF1,IPO5,POLR2A,DNAJC3,RPL3,RPL4,RPL5,RPL6,RPL7,RPL7A,RPL8,RPL9,RPL10,RPL11,RPL15,RPL17,RPL18,RPL18A,RPL19,RPL23A,RPL26,RPL30,RPL28,RPL29,RPL31,RPL32,RPL34,RPL37A,RPS2,RPS3,RPS3A,RPS4X,RPS7,RPS8,RPS9,RPS11,RPS12,RPS13,RPS14,RPS15,RPS15A,RPS16,RPS17,RPS20,RPS23,RPS26,RPS27,RPL14,RPL23,NUP58,NUP153,NUP50
1_Member	Reactome Gene Sets	R-HSA-2408557	Selenocysteine synthesis	-44.5659	-41.6478	46/94	6122,6124,6125,6128,6129,6130,6132,6133,6134,6135,6138,6139,6141,6142,6143,6147,6154,6156,6158,6159,6160,6161,6164,6168,6187,6188,6189,6191,6201,6202,6203,6205,6206,6207,6208,6209,6210,6217,6218,6224,6228,6231,6232,9045,9349,22928	RPL3,RPL4,RPL5,RPL6,RPL7,RPL7A,RPL8,RPL9,RPL10,RPL11,RPL15,RPL17,RPL18,RPL18A,RPL19,RPL23A,RPL26,RPL30,RPL28,RPL29,RPL31,RPL32,RPL34,RPL37A,RPS2,RPS3,RPS3A,RPS4X,RPS7,RPS8,RPS9,RPS11,RPS12,RPS13,RPS14,RPS15,RPS15A,RPS16,RPS17,RPS20,RPS23,RPS26,RPS27,RPL14,RPL23,SEPHS2
1_Member	Reactome Gene Sets	R-HSA-72764	Eukaryotic Translation Termination	-44.5659	-41.6478	46/94	327,6122,6124,6125,6128,6129,6130,6132,6133,6134,6135,6138,6139,6141,6142,6143,6147,6154,6156,6158,6159,6160,6161,6164,6168,6187,6188,6189,6191,6201,6202,6203,6205,6206,6207,6208,6209,6210,6217,6218,6224,6228,6231,6232,9045,9349	APEH,RPL3,RPL4,RPL5,RPL6,RPL7,RPL7A,RPL8,RPL9,RPL10,RPL11,RPL15,RPL17,RPL18,RPL18A,RPL19,RPL23A,RPL26,RPL30,RPL28,RPL29,RPL31,RPL32,RPL34,RPL37A,RPS2,RPS3,RPS3A,RPS4X,RPS7,RPS8,RPS9,RPS11,RPS12,RPS13,RPS14,RPS15,RPS15A,RPS16,RPS17,RPS20,RPS23,RPS26,RPS27,RPL14,RPL23
1_Member	Reactome Gene Sets	R-HSA-156902	Peptide chain elongation	-44.1572	-41.2549	45/90	6122,6124,6125,6128,6129,6130,6132,6133,6134,6135,6138,6139,6141,6142,6143,6147,6154,6156,6158,6159,6160,6161,6164,6168,6187,6188,6189,6191,6201,6202,6203,6205,6206,6207,6208,6209,6210,6217,6218,6224,6228,6231,6232,9045,9349	RPL3,RPL4,RPL5,RPL6,RPL7,RPL7A,RPL8,RPL9,RPL10,RPL11,RPL15,RPL17,RPL18,RPL18A,RPL19,RPL23A,RPL26,RPL30,RPL28,RPL29,RPL31,RPL32,RPL34,RPL37A,RPS2,RPS3,RPS3A,RPS4X,RPS7,RPS8,RPS9,RPS11,RPS12,RPS13,RPS14,RPS15,RPS15A,RPS16,RPS17,RPS20,RPS23,RPS26,RPS27,RPL14,RPL23
1_Member	Reactome Gene Sets	R-HSA-156842	Eukaryotic Translation Elongation	-43.0466	-40.1596	45/94	6122,6124,6125,6128,6129,6130,6132,6133,6134,6135,6138,6139,6141,6142,6143,6147,6154,6156,6158,6159,6160,6161,6164,6168,6187,6188,6189,6191,6201,6202,6203,6205,6206,6207,6208,6209,6210,6217,6218,6224,6228,6231,6232,9045,9349	RPL3,RPL4,RPL5,RPL6,RPL7,RPL7A,RPL8,RPL9,RPL10,RPL11,RPL15,RPL17,RPL18,RPL18A,RPL19,RPL23A,RPL26,RPL30,RPL28,RPL29,RPL31,RPL32,RPL34,RPL37A,RPS2,RPS3,RPS3A,RPS4X,RPS7,RPS8,RPS9,RPS11,RPS12,RPS13,RPS14,RPS15,RPS15A,RPS16,RPS17,RPS20,RPS23,RPS26,RPS27,RPL14,RPL23
1_Member	Reactome Gene Sets	R-HSA-71291	Metabolism of amino acids and derivatives	-42.7318	-39.8594	78/376	593,594,1159,1468,1491,1738,2058,2184,2744,2806,2936,3028,3376,3735,4141,4967,5160,5162,5693,5707,5709,5710,5831,5832,6122,6124,6125,6128,6129,6130,6132,6133,6134,6135,6138,6139,6141,6142,6143,6147,6154,6156,6158,6159,6160,6161,6164,6168,6187,6188,6189,6191,6201,6202,6203,6205,6206,6207,6208,6209,6210,6217,6218,6224,6228,6231,6232,8659,9045,9349,10157,10165,22928,23198,26227,51520,55526,548596	BCKDHA,BCKDHB,CKMT1B,SLC25A10,CTH,DLD,EPRS1,FAH,GLS,GOT2,GSR,HSD17B10,IARS1,KARS1,MARS1,OGDH,PDHA1,PDHB,PSMB5,PSMD1,PSMD3,PSMD4,PYCR1,ALDH18A1,RPL3,RPL4,RPL5,RPL6,RPL7,RPL7A,RPL8,RPL9,RPL10,RPL11,RPL15,RPL17,RPL18,RPL18A,RPL19,RPL23A,RPL26,RPL30,RPL28,RPL29,RPL31,RPL32,RPL34,RPL37A,RPS2,RPS3,RPS3A,RPS4X,RPS7,RPS8,RPS9,RPS11,RPS12,RPS13,RPS14,RPS15,RPS15A,RPS16,RPS17,RPS20,RPS23,RPS26,RPS27,ALDH4A…
1_Member	Reactome Gene Sets	R-HSA-2262752	Cellular responses to stress	-41.8914	-39.0333	109/789	118,207,526,1017,1327,1459,1781,1968,2135,2673,2936,3159,3162,3313,4343,4361,4513,4790,4802,5469,5606,5611,5693,5707,5709,5710,5928,5931,6122,6124,6125,6128,6129,6130,6132,6133,6134,6135,6138,6139,6141,6142,6143,6147,6154,6156,6158,6159,6160,6161,6164,6168,6187,6188,6189,6191,6201,6202,6203,6205,6206,6207,6208,6209,6210,6217,6218,6224,6228,6231,6232,6256,7029,7086,7094,7277,7353,7466,7514,8570,90…	ADD1,AKT1,ATP6V1B2,CDK2,COX4I1,CSNK2A2,DYNC1I2,EIF2S3,EXTL2,GFPT1,GSR,HMGA1,HMOX1,HSPA9,MOV10,MRE11,COX2,NFKB1,NFYC,MED1,MAP2K3,DNAJC3,PSMB5,PSMD1,PSMD3,PSMD4,RBBP4,RBBP7,RPL3,RPL4,RPL5,RPL6,RPL7,RPL7A,RPL8,RPL9,RPL10,RPL11,RPL15,RPL17,RPL18,RPL18A,RPL19,RPL23A,RPL26,RPL30,RPL28,RPL29,RPL31,RPL32,RPL34,RPL37A,RPS2,RPS3,RPS3A,RPS4X,RPS7,RPS8,RPS9,RPS11,RPS12,RPS13,RPS14,RPS15,RPS15A,RPS16,RPS17,RP…
1_Member	Reactome Gene Sets	R-HSA-1799339	SRP-dependent cotranslational protein targeting to membrane	-41.3408	-38.4965	47/113	6122,6124,6125,6128,6129,6130,6132,6133,6134,6135,6138,6139,6141,6142,6143,6147,6154,6156,6158,6159,6160,6161,6164,6168,6187,6188,6189,6191,6201,6202,6203,6205,6206,6207,6208,6209,6210,6217,6218,6224,6228,6231,6232,6728,6729,9045,9349	RPL3,RPL4,RPL5,RPL6,RPL7,RPL7A,RPL8,RPL9,RPL10,RPL11,RPL15,RPL17,RPL18,RPL18A,RPL19,RPL23A,RPL26,RPL30,RPL28,RPL29,RPL31,RPL32,RPL34,RPL37A,RPS2,RPS3,RPS3A,RPS4X,RPS7,RPS8,RPS9,RPS11,RPS12,RPS13,RPS14,RPS15,RPS15A,RPS16,RPS17,RPS20,RPS23,RPS26,RPS27,SRP19,SRP54,RPL14,RPL23
1_Member	Reactome Gene Sets	R-HSA-9711097	Cellular response to starvation	-39.6763	-36.8454	52/157	526,1968,6122,6124,6125,6128,6129,6130,6132,6133,6134,6135,6138,6139,6141,6142,6143,6147,6154,6156,6158,6159,6160,6161,6164,6168,6187,6188,6189,6191,6201,6202,6203,6205,6206,6207,6208,6209,6210,6217,6218,6224,6228,6231,6232,9045,9349,10312,10670,10985,245973,440275	ATP6V1B2,EIF2S3,RPL3,RPL4,RPL5,RPL6,RPL7,RPL7A,RPL8,RPL9,RPL10,RPL11,RPL15,RPL17,RPL18,RPL18A,RPL19,RPL23A,RPL26,RPL30,RPL28,RPL29,RPL31,RPL32,RPL34,RPL37A,RPS2,RPS3,RPS3A,RPS4X,RPS7,RPS8,RPS9,RPS11,RPS12,RPS13,RPS14,RPS15,RPS15A,RPS16,RPS17,RPS20,RPS23,RPS26,RPS27,RPL14,RPL23,TCIRG1,RRAGA,GCN1,ATP6V1C2,EIF2AK4
1_Member	Reactome Gene Sets	R-HSA-9010553	Regulation of expression of SLITs and ROBOs	-38.5802	-35.7622	53/172	1981,4686,5693,5707,5709,5710,6122,6124,6125,6128,6129,6130,6132,6133,6134,6135,6138,6139,6141,6142,6143,6147,6154,6156,6158,6159,6160,6161,6164,6168,6187,6188,6189,6191,6201,6202,6203,6205,6206,6207,6208,6209,6210,6217,6218,6224,6228,6231,6232,9045,9349,23198,26986	EIF4G1,NCBP1,PSMB5,PSMD1,PSMD3,PSMD4,RPL3,RPL4,RPL5,RPL6,RPL7,RPL7A,RPL8,RPL9,RPL10,RPL11,RPL15,RPL17,RPL18,RPL18A,RPL19,RPL23A,RPL26,RPL30,RPL28,RPL29,RPL31,RPL32,RPL34,RPL37A,RPS2,RPS3,RPS3A,RPS4X,RPS7,RPS8,RPS9,RPS11,RPS12,RPS13,RPS14,RPS15,RPS15A,RPS16,RPS17,RPS20,RPS23,RPS26,RPS27,RPL14,RPL23,PSME4,PABPC1
1_Member	Reactome Gene Sets	R-HSA-72312	rRNA processing	-37.5726	-34.7672	56/205	3028,4691,6122,6124,6125,6128,6129,6130,6132,6133,6134,6135,6138,6139,6141,6142,6143,6147,6154,6156,6158,6159,6160,6161,6164,6168,6187,6188,6189,6191,6201,6202,6203,6205,6206,6207,6208,6209,6210,6217,6218,6224,6228,6231,6232,9045,9349,9692,10799,22803,22894,23517,51106,54931,55781,60528	HSD17B10,NCL,RPL3,RPL4,RPL5,RPL6,RPL7,RPL7A,RPL8,RPL9,RPL10,RPL11,RPL15,RPL17,RPL18,RPL18A,RPL19,RPL23A,RPL26,RPL30,RPL28,RPL29,RPL31,RPL32,RPL34,RPL37A,RPS2,RPS3,RPS3A,RPS4X,RPS7,RPS8,RPS9,RPS11,RPS12,RPS13,RPS14,RPS15,RPS15A,RPS16,RPS17,RPS20,RPS23,RPS26,RPS27,RPL14,RPL23,PRORP,RPP40,XRN2,DIS3,MTREX,TFB1M,TRMT10C,RIOK2,ELAC2
1_Member	Reactome Gene Sets	R-HSA-376176	Signaling by ROBO receptors	-35.8775	-33.0843	56/219	998,1981,4686,5693,5707,5709,5710,6122,6124,6125,6128,6129,6130,6132,6133,6134,6135,6138,6139,6141,6142,6143,6147,6154,6156,6158,6159,6160,6161,6164,6168,6187,6188,6189,6191,6201,6202,6203,6205,6206,6207,6208,6209,6210,6217,6218,6224,6228,6231,6232,6714,9045,9349,23122,23198,26986	CDC42,EIF4G1,NCBP1,PSMB5,PSMD1,PSMD3,PSMD4,RPL3,RPL4,RPL5,RPL6,RPL7,RPL7A,RPL8,RPL9,RPL10,RPL11,RPL15,RPL17,RPL18,RPL18A,RPL19,RPL23A,RPL26,RPL30,RPL28,RPL29,RPL31,RPL32,RPL34,RPL37A,RPS2,RPS3,RPS3A,RPS4X,RPS7,RPS8,RPS9,RPS11,RPS12,RPS13,RPS14,RPS15,RPS15A,RPS16,RPS17,RPS20,RPS23,RPS26,RPS27,SRC,RPL14,RPL23,CLASP2,PSME4,PABPC1
1_Member	Reactome Gene Sets	R-HSA-72649	Translation initiation complex formation	-34.6832	-31.9019	33/59	1964,1968,1973,1977,1981,3646,6187,6188,6189,6191,6201,6202,6203,6205,6206,6207,6208,6209,6210,6217,6218,6224,6228,6231,6232,8661,8662,8663,8664,8667,26986,27335,51386	EIF1AX,EIF2S3,EIF4A1,EIF4E,EIF4G1,EIF3E,RPS2,RPS3,RPS3A,RPS4X,RPS7,RPS8,RPS9,RPS11,RPS12,RPS13,RPS14,RPS15,RPS15A,RPS16,RPS17,RPS20,RPS23,RPS26,RPS27,EIF3A,EIF3B,EIF3C,EIF3D,EIF3H,PABPC1,EIF3K,EIF3L
1_Member	Reactome Gene Sets	R-HSA-6791226	Major pathway of rRNA processing in the nucleolus and cytosol	-34.4631	-31.6934	51/185	4691,6122,6124,6125,6128,6129,6130,6132,6133,6134,6135,6138,6139,6141,6142,6143,6147,6154,6156,6158,6159,6160,6161,6164,6168,6187,6188,6189,6191,6201,6202,6203,6205,6206,6207,6208,6209,6210,6217,6218,6224,6228,6231,6232,9045,9349,10799,22803,22894,23517,55781	NCL,RPL3,RPL4,RPL5,RPL6,RPL7,RPL7A,RPL8,RPL9,RPL10,RPL11,RPL15,RPL17,RPL18,RPL18A,RPL19,RPL23A,RPL26,RPL30,RPL28,RPL29,RPL31,RPL32,RPL34,RPL37A,RPS2,RPS3,RPS3A,RPS4X,RPS7,RPS8,RPS9,RPS11,RPS12,RPS13,RPS14,RPS15,RPS15A,RPS16,RPS17,RPS20,RPS23,RPS26,RPS27,RPL14,RPL23,RPP40,XRN2,DIS3,MTREX,RIOK2
1_Member	Reactome Gene Sets	R-HSA-72662	Activation of the mRNA upon binding of the cap-binding complex and eIFs, and subsequent binding to 43S	-34.3484	-31.59	33/60	1964,1968,1973,1977,1981,3646,6187,6188,6189,6191,6201,6202,6203,6205,6206,6207,6208,6209,6210,6217,6218,6224,6228,6231,6232,8661,8662,8663,8664,8667,26986,27335,51386	EIF1AX,EIF2S3,EIF4A1,EIF4E,EIF4G1,EIF3E,RPS2,RPS3,RPS3A,RPS4X,RPS7,RPS8,RPS9,RPS11,RPS12,RPS13,RPS14,RPS15,RPS15A,RPS16,RPS17,RPS20,RPS23,RPS26,RPS27,EIF3A,EIF3B,EIF3C,EIF3D,EIF3H,PABPC1,EIF3K,EIF3L
1_Member	Reactome Gene Sets	R-HSA-8868773	rRNA processing in the nucleus and cytosol	-33.2282	-30.4915	51/195	4691,6122,6124,6125,6128,6129,6130,6132,6133,6134,6135,6138,6139,6141,6142,6143,6147,6154,6156,6158,6159,6160,6161,6164,6168,6187,6188,6189,6191,6201,6202,6203,6205,6206,6207,6208,6209,6210,6217,6218,6224,6228,6231,6232,9045,9349,10799,22803,22894,23517,55781	NCL,RPL3,RPL4,RPL5,RPL6,RPL7,RPL7A,RPL8,RPL9,RPL10,RPL11,RPL15,RPL17,RPL18,RPL18A,RPL19,RPL23A,RPL26,RPL30,RPL28,RPL29,RPL31,RPL32,RPL34,RPL37A,RPS2,RPS3,RPS3A,RPS4X,RPS7,RPS8,RPS9,RPS11,RPS12,RPS13,RPS14,RPS15,RPS15A,RPS16,RPS17,RPS20,RPS23,RPS26,RPS27,RPL14,RPL23,RPP40,XRN2,DIS3,MTREX,RIOK2
1_Member	Reactome Gene Sets	R-HSA-72702	Ribosomal scanning and start codon recognition	-33.0557	-30.3295	32/59	1964,1968,1973,1977,1981,3646,6187,6188,6189,6191,6201,6202,6203,6205,6206,6207,6208,6209,6210,6217,6218,6224,6228,6231,6232,8661,8662,8663,8664,8667,27335,51386	EIF1AX,EIF2S3,EIF4A1,EIF4E,EIF4G1,EIF3E,RPS2,RPS3,RPS3A,RPS4X,RPS7,RPS8,RPS9,RPS11,RPS12,RPS13,RPS14,RPS15,RPS15A,RPS16,RPS17,RPS20,RPS23,RPS26,RPS27,EIF3A,EIF3B,EIF3C,EIF3D,EIF3H,EIF3K,EIF3L
1_Member	Reactome Gene Sets	R-HSA-72695	Formation of the ternary complex, and subsequently, the 43S complex	-30.4908	-27.7946	29/52	1964,1968,3646,6187,6188,6189,6191,6201,6202,6203,6205,6206,6207,6208,6209,6210,6217,6218,6224,6228,6231,6232,8661,8662,8663,8664,8667,27335,51386	EIF1AX,EIF2S3,EIF3E,RPS2,RPS3,RPS3A,RPS4X,RPS7,RPS8,RPS9,RPS11,RPS12,RPS13,RPS14,RPS15,RPS15A,RPS16,RPS17,RPS20,RPS23,RPS26,RPS27,EIF3A,EIF3B,EIF3C,EIF3D,EIF3H,EIF3K,EIF3L
1_Member	Reactome Gene Sets	R-HSA-422475	Axon guidance	-28.9313	-26.272	76/553	160,161,163,998,1020,1173,1459,1808,1981,4686,5362,5693,5707,5709,5710,5921,5962,6122,6124,6125,6128,6129,6130,6132,6133,6134,6135,6138,6139,6141,6142,6143,6147,6154,6156,6158,6159,6160,6161,6164,6168,6187,6188,6189,6191,6201,6202,6203,6205,6206,6207,6208,6209,6210,6217,6218,6224,6228,6231,6232,6714,7094,7204,7277,7525,9045,9349,10048,10095,10096,10097,10109,23122,23198,23385,26986	AP2A1,AP2A2,AP2B1,CDC42,CDK5,AP2M1,CSNK2A2,DPYSL2,EIF4G1,NCBP1,PLXNA2,PSMB5,PSMD1,PSMD3,PSMD4,RASA1,RDX,RPL3,RPL4,RPL5,RPL6,RPL7,RPL7A,RPL8,RPL9,RPL10,RPL11,RPL15,RPL17,RPL18,RPL18A,RPL19,RPL23A,RPL26,RPL30,RPL28,RPL29,RPL31,RPL32,RPL34,RPL37A,RPS2,RPS3,RPS3A,RPS4X,RPS7,RPS8,RPS9,RPS11,RPS12,RPS13,RPS14,RPS15,RPS15A,RPS16,RPS17,RPS20,RPS23,RPS26,RPS27,SRC,TLN1,TRIO,TUBA4A,YES1,RPL14,RPL23,RANBP9,…
1_Member	Reactome Gene Sets	R-HSA-9675108	Nervous system development	-27.6584	-25.0332	76/578	160,161,163,998,1020,1173,1459,1808,1981,4686,5362,5693,5707,5709,5710,5921,5962,6122,6124,6125,6128,6129,6130,6132,6133,6134,6135,6138,6139,6141,6142,6143,6147,6154,6156,6158,6159,6160,6161,6164,6168,6187,6188,6189,6191,6201,6202,6203,6205,6206,6207,6208,6209,6210,6217,6218,6224,6228,6231,6232,6714,7094,7204,7277,7525,9045,9349,10048,10095,10096,10097,10109,23122,23198,23385,26986	AP2A1,AP2A2,AP2B1,CDC42,CDK5,AP2M1,CSNK2A2,DPYSL2,EIF4G1,NCBP1,PLXNA2,PSMB5,PSMD1,PSMD3,PSMD4,RASA1,RDX,RPL3,RPL4,RPL5,RPL6,RPL7,RPL7A,RPL8,RPL9,RPL10,RPL11,RPL15,RPL17,RPL18,RPL18A,RPL19,RPL23A,RPL26,RPL30,RPL28,RPL29,RPL31,RPL32,RPL34,RPL37A,RPS2,RPS3,RPS3A,RPS4X,RPS7,RPS8,RPS9,RPS11,RPS12,RPS13,RPS14,RPS15,RPS15A,RPS16,RPS17,RPS20,RPS23,RPS26,RPS27,SRC,TLN1,TRIO,TUBA4A,YES1,RPL14,RPL23,RANBP9,…
1_Member	CORUM	CORUM:308	60S ribosomal subunit, cytoplasmic	-27.2659	-24.6488	26/47	6122,6124,6125,6128,6129,6130,6132,6133,6134,6135,6138,6139,6141,6142,6143,6147,6154,6156,6158,6159,6160,6161,6164,6168,9045,9349	RPL3,RPL4,RPL5,RPL6,RPL7,RPL7A,RPL8,RPL9,RPL10,RPL11,RPL15,RPL17,RPL18,RPL18A,RPL19,RPL23A,RPL26,RPL30,RPL28,RPL29,RPL31,RPL32,RPL34,RPL37A,RPL14,RPL23
1_Member	KEGG Pathway	hsa05171	Coronavirus disease - COVID-19	-25.3662	-22.7571	47/232	4790,5610,6122,6124,6125,6128,6129,6130,6132,6133,6134,6135,6138,6139,6141,6142,6143,6147,6154,6156,6158,6159,6160,6161,6164,6168,6187,6188,6189,6191,6201,6202,6203,6205,6206,6207,6208,6209,6210,6217,6218,6224,6228,6231,6232,9045,9349	NFKB1,EIF2AK2,RPL3,RPL4,RPL5,RPL6,RPL7,RPL7A,RPL8,RPL9,RPL10,RPL11,RPL15,RPL17,RPL18,RPL18A,RPL19,RPL23A,RPL26,RPL30,RPL28,RPL29,RPL31,RPL32,RPL34,RPL37A,RPS2,RPS3,RPS3A,RPS4X,RPS7,RPS8,RPS9,RPS11,RPS12,RPS13,RPS14,RPS15,RPS15A,RPS16,RPS17,RPS20,RPS23,RPS26,RPS27,RPL14,RPL23
1_Member	Reactome Gene Sets	R-HSA-9679506	SARS-CoV Infections	-23.3262	-20.7621	59/414	160,161,163,207,598,1108,1173,1514,1655,3276,3837,3838,4089,4124,4790,5094,5479,5928,5931,6187,6188,6189,6191,6201,6202,6203,6205,6206,6207,6208,6209,6210,6217,6218,6224,6228,6231,6232,7284,7555,9112,9818,9868,9972,10146,10728,10762,10802,11218,11253,11311,23028,25929,30849,50628,54815,57504,64398,65082	AP2A1,AP2A2,AP2B1,AKT1,BCL2L1,CHD4,AP2M1,CTSL,DDX5,PRMT1,KPNB1,KPNA2,SMAD4,MAN2A1,NFKB1,PCBP2,PPIB,RBBP4,RBBP7,RPS2,RPS3,RPS3A,RPS4X,RPS7,RPS8,RPS9,RPS11,RPS12,RPS13,RPS14,RPS15,RPS15A,RPS16,RPS17,RPS20,RPS23,RPS26,RPS27,TUFM,CNBP,MTA1,NUP58,TOMM70,NUP153,G3BP1,PTGES3,NUP50,SEC24A,DDX20,MAN1B1,VPS45,KDM1A,GEMIN5,PIK3R4,GEMIN4,GATAD2A,MTA3,PALS1,VPS33A
1_Member	CORUM	CORUM:305	40S ribosomal subunit, cytoplasmic	-20.5344	-18.0362	19/33	6187,6188,6189,6191,6201,6202,6203,6205,6206,6207,6208,6209,6210,6217,6218,6224,6228,6231,6232	RPS2,RPS3,RPS3A,RPS4X,RPS7,RPS8,RPS9,RPS11,RPS12,RPS13,RPS14,RPS15,RPS15A,RPS16,RPS17,RPS20,RPS23,RPS26,RPS27
1_Member	Reactome Gene Sets	R-HSA-9754678	SARS-CoV-2 modulates host translation machinery	-20.0733	-17.6103	22/51	6187,6188,6189,6191,6201,6202,6203,6205,6206,6207,6208,6209,6210,6217,6218,6224,6228,6231,6232,11218,25929,50628	RPS2,RPS3,RPS3A,RPS4X,RPS7,RPS8,RPS9,RPS11,RPS12,RPS13,RPS14,RPS15,RPS15A,RPS16,RPS17,RPS20,RPS23,RPS26,RPS27,DDX20,GEMIN5,GEMIN4
1_Member	Reactome Gene Sets	R-HSA-9692914	SARS-CoV-1-host interactions	-19.9088	-17.4514	28/96	598,3837,3838,4089,4790,5094,5479,6187,6188,6189,6191,6201,6202,6203,6205,6206,6207,6208,6209,6210,6217,6218,6224,6228,6231,6232,9868,64398	BCL2L1,KPNB1,KPNA2,SMAD4,NFKB1,PCBP2,PPIB,RPS2,RPS3,RPS3A,RPS4X,RPS7,RPS8,RPS9,RPS11,RPS12,RPS13,RPS14,RPS15,RPS15A,RPS16,RPS17,RPS20,RPS23,RPS26,RPS27,TOMM70,PALS1
1_Member	CORUM	CORUM:338	40S ribosomal subunit, cytoplasmic	-19.5755	-17.1291	18/31	6187,6188,6189,6191,6201,6202,6203,6205,6206,6207,6208,6209,6210,6217,6218,6224,6228,6231	RPS2,RPS3,RPS3A,RPS4X,RPS7,RPS8,RPS9,RPS11,RPS12,RPS13,RPS14,RPS15,RPS15A,RPS16,RPS17,RPS20,RPS23,RPS26
1_Member	Reactome Gene Sets	R-HSA-9735869	SARS-CoV-1 modulates host translation machinery	-19.2478	-16.8122	19/37	6187,6188,6189,6191,6201,6202,6203,6205,6206,6207,6208,6209,6210,6217,6218,6224,6228,6231,6232	RPS2,RPS3,RPS3A,RPS4X,RPS7,RPS8,RPS9,RPS11,RPS12,RPS13,RPS14,RPS15,RPS15A,RPS16,RPS17,RPS20,RPS23,RPS26,RPS27
1_Member	Reactome Gene Sets	R-HSA-9678108	SARS-CoV-1 Infection	-17.9249	-15.5344	31/142	598,1514,1655,3837,3838,4089,4790,5094,5479,6187,6188,6189,6191,6201,6202,6203,6205,6206,6207,6208,6209,6210,6217,6218,6224,6228,6231,6232,9868,30849,64398	BCL2L1,CTSL,DDX5,KPNB1,KPNA2,SMAD4,NFKB1,PCBP2,PPIB,RPS2,RPS3,RPS3A,RPS4X,RPS7,RPS8,RPS9,RPS11,RPS12,RPS13,RPS14,RPS15,RPS15A,RPS16,RPS17,RPS20,RPS23,RPS26,RPS27,TOMM70,PIK3R4,PALS1
1_Member	Reactome Gene Sets	R-HSA-9705683	SARS-CoV-2-host interactions	-17.5624	-15.1814	36/203	207,3838,6187,6188,6189,6191,6201,6202,6203,6205,6206,6207,6208,6209,6210,6217,6218,6224,6228,6231,6232,7284,7555,9818,9868,9972,10146,10762,10802,11218,11311,25929,30849,50628,64398,65082	AKT1,KPNA2,RPS2,RPS3,RPS3A,RPS4X,RPS7,RPS8,RPS9,RPS11,RPS12,RPS13,RPS14,RPS15,RPS15A,RPS16,RPS17,RPS20,RPS23,RPS26,RPS27,TUFM,CNBP,NUP58,TOMM70,NUP153,G3BP1,NUP50,SEC24A,DDX20,VPS45,GEMIN5,PIK3R4,GEMIN4,PALS1,VPS33A
1_Member	Reactome Gene Sets	R-HSA-9694516	SARS-CoV-2 Infection	-15.7595	-13.4229	41/299	207,1514,1655,3276,3838,4124,6187,6188,6189,6191,6201,6202,6203,6205,6206,6207,6208,6209,6210,6217,6218,6224,6228,6231,6232,7284,7555,9818,9868,9972,10146,10762,10802,11218,11253,11311,25929,30849,50628,64398,65082	AKT1,CTSL,DDX5,PRMT1,KPNA2,MAN2A1,RPS2,RPS3,RPS3A,RPS4X,RPS7,RPS8,RPS9,RPS11,RPS12,RPS13,RPS14,RPS15,RPS15A,RPS16,RPS17,RPS20,RPS23,RPS26,RPS27,TUFM,CNBP,NUP58,TOMM70,NUP153,G3BP1,NUP50,SEC24A,DDX20,MAN1B1,VPS45,GEMIN5,PIK3R4,GEMIN4,PALS1,VPS33A
2_Summary	GO Biological Processes	GO:2000112	regulation of cellular macromolecule biosynthetic process	-33.6903	-30.9429	85/594	16,207,1153,1499,1653,1654,1977,1981,1982,2058,2235,2332,2629,2801,3276,3646,4076,4343,4686,4691,4904,5499,5591,5610,5611,5813,5935,5976,6125,6134,6154,6188,6191,6203,6208,6311,6472,6646,6741,7072,7555,8087,8570,8662,8663,8664,8667,8890,9375,9669,10102,10128,10131,10399,10642,10643,10657,10658,10985,22868,22894,22930,23019,23107,23385,23456,25782,25904,25929,26986,27335,28998,29883,51204,51441,54…	AARS1,AKT1,CIRBP,CTNNB1,DDX1,DDX3X,EIF4E,EIF4G1,EIF4G2,EPRS1,FECH,FMR1,GBA1,GOLGA2,PRMT1,EIF3E,CAPRIN1,MOV10,NCBP1,NCL,YBX1,PPP1CA,PRKDC,EIF2AK2,DNAJC3,PURA,RBM3,UPF1,RPL5,RPL10,RPL26,RPS3,RPS4X,RPS9,RPS14,ATXN2,SHMT2,SOAT1,SSB,TIA1,CNBP,FXR1,KHSRP,EIF3B,EIF3C,EIF3D,EIF3H,EIF2B4,TM9SF2,EIF5B,TSFM,LRPPRC,TRAP1,RACK1,IGF2BP1,IGF2BP3,KHDRBS1,CELF1,GCN1,FASTKD2,DIS3,RAB3GAP1,CNOT1,MRPS27,NCSTN,ABCB10…
2_Member	GO Biological Processes	GO:2000112	regulation of cellular macromolecule biosynthetic process	-33.6903	-30.9429	85/594	16,207,1153,1499,1653,1654,1977,1981,1982,2058,2235,2332,2629,2801,3276,3646,4076,4343,4686,4691,4904,5499,5591,5610,5611,5813,5935,5976,6125,6134,6154,6188,6191,6203,6208,6311,6472,6646,6741,7072,7555,8087,8570,8662,8663,8664,8667,8890,9375,9669,10102,10128,10131,10399,10642,10643,10657,10658,10985,22868,22894,22930,23019,23107,23385,23456,25782,25904,25929,26986,27335,28998,29883,51204,51441,54…	AARS1,AKT1,CIRBP,CTNNB1,DDX1,DDX3X,EIF4E,EIF4G1,EIF4G2,EPRS1,FECH,FMR1,GBA1,GOLGA2,PRMT1,EIF3E,CAPRIN1,MOV10,NCBP1,NCL,YBX1,PPP1CA,PRKDC,EIF2AK2,DNAJC3,PURA,RBM3,UPF1,RPL5,RPL10,RPL26,RPS3,RPS4X,RPS9,RPS14,ATXN2,SHMT2,SOAT1,SSB,TIA1,CNBP,FXR1,KHSRP,EIF3B,EIF3C,EIF3D,EIF3H,EIF2B4,TM9SF2,EIF5B,TSFM,LRPPRC,TRAP1,RACK1,IGF2BP1,IGF2BP3,KHDRBS1,CELF1,GCN1,FASTKD2,DIS3,RAB3GAP1,CNOT1,MRPS27,NCSTN,ABCB10…
2_Member	GO Biological Processes	GO:0006417	regulation of translation	-30.739	-28.033	75/506	16,207,1153,1653,1654,1977,1981,1982,2058,2235,2332,3646,4076,4343,4686,4691,4904,5499,5591,5610,5611,5813,5935,5976,6125,6134,6154,6188,6191,6203,6208,6311,6472,6741,7072,7555,8087,8570,8662,8663,8664,8667,8890,9669,10102,10128,10131,10399,10642,10643,10657,10658,10985,22868,22894,23019,23107,25904,25929,26986,27335,28998,29883,51204,51441,54931,55005,55037,55571,55802,79727,81554,131405,201626,…	AARS1,AKT1,CIRBP,DDX1,DDX3X,EIF4E,EIF4G1,EIF4G2,EPRS1,FECH,FMR1,EIF3E,CAPRIN1,MOV10,NCBP1,NCL,YBX1,PPP1CA,PRKDC,EIF2AK2,DNAJC3,PURA,RBM3,UPF1,RPL5,RPL10,RPL26,RPS3,RPS4X,RPS9,RPS14,ATXN2,SHMT2,SSB,TIA1,CNBP,FXR1,KHSRP,EIF3B,EIF3C,EIF3D,EIF3H,EIF2B4,EIF5B,TSFM,LRPPRC,TRAP1,RACK1,IGF2BP1,IGF2BP3,KHDRBS1,CELF1,GCN1,FASTKD2,DIS3,CNOT1,MRPS27,CNOT10,GEMIN5,PABPC1,EIF3K,MRPL13,CNOT7,TACO1,YTHDF2,TRMT10…
2_Member	GO Biological Processes	GO:0034248	regulation of amide metabolic process	-28.0073	-25.3739	76/571	16,207,1153,1653,1654,1977,1981,1982,2058,2235,2332,3646,4076,4343,4686,4691,4904,5499,5591,5610,5611,5813,5935,5976,6125,6134,6154,6188,6191,6203,6208,6311,6472,6741,7072,7555,8087,8301,8570,8662,8663,8664,8667,8890,9669,10102,10128,10131,10399,10642,10643,10657,10658,10985,22868,22894,23019,23107,25904,25929,26986,27335,28998,29883,51204,51441,54931,55005,55037,55571,55802,79727,81554,131405,20…	AARS1,AKT1,CIRBP,DDX1,DDX3X,EIF4E,EIF4G1,EIF4G2,EPRS1,FECH,FMR1,EIF3E,CAPRIN1,MOV10,NCBP1,NCL,YBX1,PPP1CA,PRKDC,EIF2AK2,DNAJC3,PURA,RBM3,UPF1,RPL5,RPL10,RPL26,RPS3,RPS4X,RPS9,RPS14,ATXN2,SHMT2,SSB,TIA1,CNBP,FXR1,PICALM,KHSRP,EIF3B,EIF3C,EIF3D,EIF3H,EIF2B4,EIF5B,TSFM,LRPPRC,TRAP1,RACK1,IGF2BP1,IGF2BP3,KHDRBS1,CELF1,GCN1,FASTKD2,DIS3,CNOT1,MRPS27,CNOT10,GEMIN5,PABPC1,EIF3K,MRPL13,CNOT7,TACO1,YTHDF2…
2_Member	GO Biological Processes	GO:1903311	regulation of mRNA metabolic process	-19.4947	-17.0537	48/329	207,1025,1153,1655,2332,2521,3190,4343,4686,4691,4904,5935,5976,6428,6431,7072,7186,7536,8087,8148,8570,9238,9584,10521,10642,10643,10657,10658,11338,22827,22868,22894,23019,25904,26135,26528,26986,27339,29883,51441,54502,55571,55677,55802,79577,79869,131405,201626	AKT1,CDK9,CIRBP,DDX5,FMR1,FUS,HNRNPK,MOV10,NCBP1,NCL,YBX1,RBM3,UPF1,SRSF3,SRSF6,TIA1,TRAF2,SF1,FXR1,TAF15,KHSRP,TBRG4,RBM39,DDX17,IGF2BP1,IGF2BP3,KHDRBS1,CELF1,U2AF2,PUF60,FASTKD2,DIS3,CNOT1,CNOT10,SERBP1,DAZAP1,PABPC1,PRPF19,CNOT7,YTHDF2,RBM47,CNOT11,IWS1,DCP1A,CDC73,CPSF7,TRIM71,PDE12
2_Member	GO Biological Processes	GO:0045727	positive regulation of translation	-16.0674	-13.7222	29/141	1153,1654,1981,2332,3646,4904,5591,5611,5935,6125,6154,6191,6741,7555,8087,8663,8664,10642,10657,10985,22868,23107,26986,51441,54931,55005,79727,81554,440275	CIRBP,DDX3X,EIF4G1,FMR1,EIF3E,YBX1,PRKDC,DNAJC3,RBM3,RPL5,RPL26,RPS4X,SSB,CNBP,FXR1,EIF3C,EIF3D,IGF2BP1,KHDRBS1,GCN1,FASTKD2,MRPS27,PABPC1,YTHDF2,TRMT10C,RMND1,LIN28A,RCC1L,EIF2AK4
2_Member	GO Biological Processes	GO:0034250	positive regulation of amide metabolic process	-14.8271	-12.5269	30/168	1153,1654,1981,2332,3646,4904,5591,5611,5935,6125,6154,6191,6741,7555,8087,8301,8663,8664,10642,10657,10985,22868,23107,26986,51441,54931,55005,79727,81554,440275	CIRBP,DDX3X,EIF4G1,FMR1,EIF3E,YBX1,PRKDC,DNAJC3,RBM3,RPL5,RPL26,RPS4X,SSB,CNBP,FXR1,PICALM,EIF3C,EIF3D,IGF2BP1,KHDRBS1,GCN1,FASTKD2,MRPS27,PABPC1,YTHDF2,TRMT10C,RMND1,LIN28A,RCC1L,EIF2AK4
2_Member	GO Biological Processes	GO:0017148	negative regulation of translation	-12.9025	-10.6833	35/268	1153,1654,1977,1981,2058,2332,3646,4076,4343,4691,4904,5610,5813,5976,6188,6472,7072,8087,8570,10399,10642,10643,10658,22894,23019,25904,28998,29883,51441,55571,55802,79727,131405,201626,440275	CIRBP,DDX3X,EIF4E,EIF4G1,EPRS1,FMR1,EIF3E,CAPRIN1,MOV10,NCL,YBX1,EIF2AK2,PURA,UPF1,RPS3,SHMT2,TIA1,FXR1,KHSRP,RACK1,IGF2BP1,IGF2BP3,CELF1,DIS3,CNOT1,CNOT10,MRPL13,CNOT7,YTHDF2,CNOT11,DCP1A,LIN28A,TRIM71,PDE12,EIF2AK4
2_Member	GO Biological Processes	GO:0043487	regulation of RNA stability	-12.5057	-10.3146	30/204	207,1153,2332,2521,4343,4904,5976,7186,8087,8148,8570,9238,10642,10643,10658,22868,22894,23019,25904,26135,26986,29883,51441,54502,54888,55571,55802,131405,201626,389421	AKT1,CIRBP,FMR1,FUS,MOV10,YBX1,UPF1,TRAF2,FXR1,TAF15,KHSRP,TBRG4,IGF2BP1,IGF2BP3,CELF1,FASTKD2,DIS3,CNOT1,CNOT10,SERBP1,PABPC1,CNOT7,YTHDF2,RBM47,NSUN2,CNOT11,DCP1A,TRIM71,PDE12,LIN28B
2_Member	GO Biological Processes	GO:2000113	negative regulation of cellular macromolecule biosynthetic process	-11.7564	-9.5888	35/293	1153,1654,1977,1981,2058,2332,3646,4076,4343,4691,4904,5610,5813,5976,6188,6472,7072,8087,8570,10399,10642,10643,10658,22894,23019,25904,28998,29883,51441,55571,55802,79727,131405,201626,440275	CIRBP,DDX3X,EIF4E,EIF4G1,EPRS1,FMR1,EIF3E,CAPRIN1,MOV10,NCL,YBX1,EIF2AK2,PURA,UPF1,RPS3,SHMT2,TIA1,FXR1,KHSRP,RACK1,IGF2BP1,IGF2BP3,CELF1,DIS3,CNOT1,CNOT10,MRPL13,CNOT7,YTHDF2,CNOT11,DCP1A,LIN28A,TRIM71,PDE12,EIF2AK4
2_Member	GO Biological Processes	GO:0034249	negative regulation of amide metabolic process	-11.6705	-9.5057	35/295	1153,1654,1977,1981,2058,2332,3646,4076,4343,4691,4904,5610,5813,5976,6188,6472,7072,8087,8570,10399,10642,10643,10658,22894,23019,25904,28998,29883,51441,55571,55802,79727,131405,201626,440275	CIRBP,DDX3X,EIF4E,EIF4G1,EPRS1,FMR1,EIF3E,CAPRIN1,MOV10,NCL,YBX1,EIF2AK2,PURA,UPF1,RPS3,SHMT2,TIA1,FXR1,KHSRP,RACK1,IGF2BP1,IGF2BP3,CELF1,DIS3,CNOT1,CNOT10,MRPL13,CNOT7,YTHDF2,CNOT11,DCP1A,LIN28A,TRIM71,PDE12,EIF2AK4
2_Member	GO Biological Processes	GO:0043488	regulation of mRNA stability	-11.6256	-9.46368	28/192	207,1153,2332,2521,4343,4904,5976,7186,8087,8148,8570,9238,10642,10643,10658,22868,22894,23019,25904,26135,26986,29883,51441,54502,55571,55802,131405,201626	AKT1,CIRBP,FMR1,FUS,MOV10,YBX1,UPF1,TRAF2,FXR1,TAF15,KHSRP,TBRG4,IGF2BP1,IGF2BP3,CELF1,FASTKD2,DIS3,CNOT1,CNOT10,SERBP1,PABPC1,CNOT7,YTHDF2,RBM47,CNOT11,DCP1A,TRIM71,PDE12
2_Member	GO Biological Processes	GO:0061013	regulation of mRNA catabolic process	-10.5709	-8.4767	28/212	207,1153,2332,2521,4343,4904,5976,7186,8087,8148,8570,9238,10642,10643,10658,22868,22894,23019,25904,26135,26986,29883,51441,54502,55571,55802,131405,201626	AKT1,CIRBP,FMR1,FUS,MOV10,YBX1,UPF1,TRAF2,FXR1,TAF15,KHSRP,TBRG4,IGF2BP1,IGF2BP3,CELF1,FASTKD2,DIS3,CNOT1,CNOT10,SERBP1,PABPC1,CNOT7,YTHDF2,RBM47,CNOT11,DCP1A,TRIM71,PDE12
2_Member	GO Biological Processes	GO:0006401	RNA catabolic process	-10.2643	-8.18901	24/161	1655,3646,4686,5976,6741,10128,22803,22894,23019,23517,25904,26986,27044,29883,51441,55571,55596,55802,60528,79621,79727,80335,201626,389421	DDX5,EIF3E,NCBP1,UPF1,SSB,LRPPRC,XRN2,DIS3,CNOT1,MTREX,CNOT10,PABPC1,SND1,CNOT7,YTHDF2,CNOT11,ZCCHC8,DCP1A,ELAC2,RNASEH2B,LIN28A,WDR82,PDE12,LIN28B
2_Member	GO Biological Processes	GO:0034655	nucleobase-containing compound catabolic process	-8.94041	-6.94505	30/282	215,1267,1655,3646,4686,4860,5976,6741,8802,8803,10128,22803,22894,23019,23517,25904,25939,26986,27044,29883,51441,55571,55596,55802,60528,79621,79727,80335,201626,389421	ABCD1,CNP,DDX5,EIF3E,NCBP1,PNP,UPF1,SSB,SUCLG1,SUCLA2,LRPPRC,XRN2,DIS3,CNOT1,MTREX,CNOT10,SAMHD1,PABPC1,SND1,CNOT7,YTHDF2,CNOT11,ZCCHC8,DCP1A,ELAC2,RNASEH2B,LIN28A,WDR82,PDE12,LIN28B
2_Member	GO Biological Processes	GO:1903313	positive regulation of mRNA metabolic process	-8.19448	-6.28117	21/157	1153,4343,4686,4691,5935,5976,8570,10658,22894,23019,25904,26528,26986,27339,29883,51441,55571,55802,79577,131405,201626	CIRBP,MOV10,NCBP1,NCL,RBM3,UPF1,KHSRP,CELF1,DIS3,CNOT1,CNOT10,DAZAP1,PABPC1,PRPF19,CNOT7,YTHDF2,CNOT11,DCP1A,CDC73,TRIM71,PDE12
2_Member	GO Biological Processes	GO:0046700	heterocycle catabolic process	-8.16743	-6.25729	31/322	215,1267,1655,3162,3646,4686,4860,5976,6741,8802,8803,10128,22803,22894,23019,23517,25904,25939,26986,27044,29883,51441,55571,55596,55802,60528,79621,79727,80335,201626,389421	ABCD1,CNP,DDX5,HMOX1,EIF3E,NCBP1,PNP,UPF1,SSB,SUCLG1,SUCLA2,LRPPRC,XRN2,DIS3,CNOT1,MTREX,CNOT10,SAMHD1,PABPC1,SND1,CNOT7,YTHDF2,CNOT11,ZCCHC8,DCP1A,ELAC2,RNASEH2B,LIN28A,WDR82,PDE12,LIN28B
2_Member	GO Biological Processes	GO:0044270	cellular nitrogen compound catabolic process	-8.10384	-6.19997	31/324	215,1267,1655,3162,3646,4686,4860,5976,6741,8802,8803,10128,22803,22894,23019,23517,25904,25939,26986,27044,29883,51441,55571,55596,55802,60528,79621,79727,80335,201626,389421	ABCD1,CNP,DDX5,HMOX1,EIF3E,NCBP1,PNP,UPF1,SSB,SUCLG1,SUCLA2,LRPPRC,XRN2,DIS3,CNOT1,MTREX,CNOT10,SAMHD1,PABPC1,SND1,CNOT7,YTHDF2,CNOT11,ZCCHC8,DCP1A,ELAC2,RNASEH2B,LIN28A,WDR82,PDE12,LIN28B
2_Member	GO Biological Processes	GO:0019439	aromatic compound catabolic process	-8.07854	-6.1829	32/343	215,1267,1655,2184,3162,3646,4686,4860,5976,6741,8802,8803,10128,22803,22894,23019,23517,25904,25939,26986,27044,29883,51441,55571,55596,55802,60528,79621,79727,80335,201626,389421	ABCD1,CNP,DDX5,FAH,HMOX1,EIF3E,NCBP1,PNP,UPF1,SSB,SUCLG1,SUCLA2,LRPPRC,XRN2,DIS3,CNOT1,MTREX,CNOT10,SAMHD1,PABPC1,SND1,CNOT7,YTHDF2,CNOT11,ZCCHC8,DCP1A,ELAC2,RNASEH2B,LIN28A,WDR82,PDE12,LIN28B
2_Member	GO Biological Processes	GO:1901361	organic cyclic compound catabolic process	-7.83011	-5.9534	33/370	215,1267,1655,2184,3162,3646,4686,4860,5976,6741,8802,8803,10128,22803,22894,23019,23517,25904,25939,26986,27044,29883,51170,51441,55571,55596,55802,60528,79621,79727,80335,201626,389421	ABCD1,CNP,DDX5,FAH,HMOX1,EIF3E,NCBP1,PNP,UPF1,SSB,SUCLG1,SUCLA2,LRPPRC,XRN2,DIS3,CNOT1,MTREX,CNOT10,SAMHD1,PABPC1,SND1,CNOT7,HSD17B11,YTHDF2,CNOT11,ZCCHC8,DCP1A,ELAC2,RNASEH2B,LIN28A,WDR82,PDE12,LIN28B
2_Member	GO Biological Processes	GO:0009896	positive regulation of catabolic process	-7.09037	-5.28373	40/540	207,215,292,1642,2332,2629,2926,3162,3416,4343,4734,4905,5286,5770,5962,5976,6829,8078,8570,10399,10558,10658,22894,22930,23019,23376,25782,25904,26986,29883,29978,51441,55571,55737,55802,65992,79888,131405,201626,389421	AKT1,ABCD1,SLC25A5,DDB1,FMR1,GBA1,GRSF1,HMOX1,IDE,MOV10,NEDD4,NSF,PIK3C2A,PTPN1,RDX,UPF1,SUPT5H,USP5,KHSRP,RACK1,SPTLC1,CELF1,DIS3,RAB3GAP1,CNOT1,UFL1,RAB3GAP2,CNOT10,PABPC1,CNOT7,UBQLN2,YTHDF2,CNOT11,VPS35,DCP1A,DDRGK1,LPCAT1,TRIM71,PDE12,LIN28B
2_Member	GO Biological Processes	GO:0006402	mRNA catabolic process	-6.23115	-4.51007	16/123	1655,3646,4686,5976,6741,22803,22894,23019,25904,26986,27044,29883,51441,55571,55802,201626	DDX5,EIF3E,NCBP1,UPF1,SSB,XRN2,DIS3,CNOT1,CNOT10,PABPC1,SND1,CNOT7,YTHDF2,CNOT11,DCP1A,PDE12
2_Member	GO Biological Processes	GO:0000956	nuclear-transcribed mRNA catabolic process	-5.86627	-4.17946	14/101	1655,3646,4686,5976,6741,22803,22894,23019,25904,26986,29883,55571,55802,201626	DDX5,EIF3E,NCBP1,UPF1,SSB,XRN2,DIS3,CNOT1,CNOT10,PABPC1,CNOT7,CNOT11,DCP1A,PDE12
2_Member	GO Biological Processes	GO:0031331	positive regulation of cellular catabolic process	-5.60919	-3.9508	32/441	207,215,292,2629,2926,3162,4343,5286,5770,5976,6829,8078,8570,10399,10558,10658,22894,22930,23019,23376,25782,25904,26986,29883,29978,51441,55571,55802,65992,131405,201626,389421	AKT1,ABCD1,SLC25A5,GBA1,GRSF1,HMOX1,MOV10,PIK3C2A,PTPN1,UPF1,SUPT5H,USP5,KHSRP,RACK1,SPTLC1,CELF1,DIS3,RAB3GAP1,CNOT1,UFL1,RAB3GAP2,CNOT10,PABPC1,CNOT7,UBQLN2,YTHDF2,CNOT11,DCP1A,DDRGK1,TRIM71,PDE12,LIN28B
2_Member	GO Biological Processes	GO:0050779	RNA destabilization	-5.56116	-3.90892	14/107	4343,5976,8570,10658,22894,23019,25904,29883,51441,55571,55802,131405,201626,389421	MOV10,UPF1,KHSRP,CELF1,DIS3,CNOT1,CNOT10,CNOT7,YTHDF2,CNOT11,DCP1A,TRIM71,PDE12,LIN28B
2_Member	GO Biological Processes	GO:0061014	positive regulation of mRNA catabolic process	-5.05655	-3.472	14/118	4343,5976,8570,10658,22894,23019,25904,26986,29883,51441,55571,55802,131405,201626	MOV10,UPF1,KHSRP,CELF1,DIS3,CNOT1,CNOT10,PABPC1,CNOT7,YTHDF2,CNOT11,DCP1A,TRIM71,PDE12
2_Member	GO Biological Processes	GO:0061157	mRNA destabilization	-5.03347	-3.4519	13/103	4343,5976,8570,10658,22894,23019,25904,29883,51441,55571,55802,131405,201626	MOV10,UPF1,KHSRP,CELF1,DIS3,CNOT1,CNOT10,CNOT7,YTHDF2,CNOT11,DCP1A,TRIM71,PDE12
3_Summary	GO Biological Processes	GO:0140053	mitochondrial gene expression	-32.2152	-29.4992	44/142	3028,5188,7284,7818,9238,9692,9801,10102,10240,10884,11222,22868,23107,28998,29088,29093,51067,51073,51106,51116,51253,54148,54931,54938,54948,55037,55157,55699,56945,57038,57129,60488,60528,64432,64928,64976,64978,65005,65008,65993,84311,85476,124995,219927,5018	HSD17B10,GATB,TUFM,DAP3,TBRG4,PRORP,MRPL19,TSFM,MRPS31,MRPS30,MRPL3,FASTKD2,MRPS27,MRPL13,MRPL15,MRPL22,YARS2,MRPL4,TFB1M,MRPS2,MRPL37,MRPL39,TRMT10C,SARS2,MRPL16,PTCD3,DARS2,IARS2,MRPS22,RARS2,MRPL47,MRPS35,ELAC2,MRPS25,MRPL14,MRPL40,MRPL38,MRPL9,MRPL1,MRPS34,MRPL45,GFM1,MRPL10,MRPL21,OXA1L
3_Member	GO Biological Processes	GO:0140053	mitochondrial gene expression	-32.2152	-29.4992	44/142	3028,5188,7284,7818,9238,9692,9801,10102,10240,10884,11222,22868,23107,28998,29088,29093,51067,51073,51106,51116,51253,54148,54931,54938,54948,55037,55157,55699,56945,57038,57129,60488,60528,64432,64928,64976,64978,65005,65008,65993,84311,85476,124995,219927	HSD17B10,GATB,TUFM,DAP3,TBRG4,PRORP,MRPL19,TSFM,MRPS31,MRPS30,MRPL3,FASTKD2,MRPS27,MRPL13,MRPL15,MRPL22,YARS2,MRPL4,TFB1M,MRPS2,MRPL37,MRPL39,TRMT10C,SARS2,MRPL16,PTCD3,DARS2,IARS2,MRPS22,RARS2,MRPL47,MRPS35,ELAC2,MRPS25,MRPL14,MRPL40,MRPL38,MRPL9,MRPL1,MRPS34,MRPL45,GFM1,MRPL10,MRPL21
3_Member	GO Biological Processes	GO:0032543	mitochondrial translation	-29.7342	-27.066	38/111	5188,7284,7818,9801,10102,10240,10884,11222,22868,23107,28998,29088,29093,51067,51073,51116,51253,54148,54938,54948,55037,55157,55699,56945,57038,57129,60488,64432,64928,64976,64978,65005,65008,65993,84311,85476,124995,219927	GATB,TUFM,DAP3,MRPL19,TSFM,MRPS31,MRPS30,MRPL3,FASTKD2,MRPS27,MRPL13,MRPL15,MRPL22,YARS2,MRPL4,MRPS2,MRPL37,MRPL39,SARS2,MRPL16,PTCD3,DARS2,IARS2,MRPS22,RARS2,MRPL47,MRPS35,MRPS25,MRPL14,MRPL40,MRPL38,MRPL9,MRPL1,MRPS34,MRPL45,GFM1,MRPL10,MRPL21
3_Member	Reactome Gene Sets	R-HSA-5389840	Mitochondrial translation elongation	-24.9789	-22.3853	31/87	5018,7284,7818,9801,10102,10240,10884,11222,23107,28998,29088,29093,51073,51116,51253,54148,54948,55037,56945,57129,60488,64432,64928,64976,64978,65005,65008,65993,85476,124995,219927	OXA1L,TUFM,DAP3,MRPL19,TSFM,MRPS31,MRPS30,MRPL3,MRPS27,MRPL13,MRPL15,MRPL22,MRPL4,MRPS2,MRPL37,MRPL39,MRPL16,PTCD3,MRPS22,MRPL47,MRPS35,MRPS25,MRPL14,MRPL40,MRPL38,MRPL9,MRPL1,MRPS34,GFM1,MRPL10,MRPL21
3_Member	Reactome Gene Sets	R-HSA-5368287	Mitochondrial translation	-23.9573	-21.3787	31/93	5018,7284,7818,9801,10102,10240,10884,11222,23107,28998,29088,29093,51073,51116,51253,54148,54948,55037,56945,57129,60488,64432,64928,64976,64978,65005,65008,65993,85476,124995,219927	OXA1L,TUFM,DAP3,MRPL19,TSFM,MRPS31,MRPS30,MRPL3,MRPS27,MRPL13,MRPL15,MRPL22,MRPL4,MRPS2,MRPL37,MRPL39,MRPL16,PTCD3,MRPS22,MRPL47,MRPS35,MRPS25,MRPL14,MRPL40,MRPL38,MRPL9,MRPL1,MRPS34,GFM1,MRPL10,MRPL21
3_Member	Reactome Gene Sets	R-HSA-5368286	Mitochondrial translation initiation	-21.2212	-18.7042	28/87	5018,7818,9801,10240,10884,11222,23107,28998,29088,29093,51073,51116,51253,54148,54948,55037,56945,57129,60488,64432,64928,64976,64978,65005,65008,65993,124995,219927	OXA1L,DAP3,MRPL19,MRPS31,MRPS30,MRPL3,MRPS27,MRPL13,MRPL15,MRPL22,MRPL4,MRPS2,MRPL37,MRPL39,MRPL16,PTCD3,MRPS22,MRPL47,MRPS35,MRPS25,MRPL14,MRPL40,MRPL38,MRPL9,MRPL1,MRPS34,MRPL10,MRPL21
3_Member	Reactome Gene Sets	R-HSA-5419276	Mitochondrial translation termination	-21.2212	-18.7042	28/87	5018,7818,9801,10240,10884,11222,23107,28998,29088,29093,51073,51116,51253,54148,54948,55037,56945,57129,60488,64432,64928,64976,64978,65005,65008,65993,124995,219927	OXA1L,DAP3,MRPL19,MRPS31,MRPS30,MRPL3,MRPS27,MRPL13,MRPL15,MRPL22,MRPL4,MRPS2,MRPL37,MRPL39,MRPL16,PTCD3,MRPS22,MRPL47,MRPS35,MRPS25,MRPL14,MRPL40,MRPL38,MRPL9,MRPL1,MRPS34,MRPL10,MRPL21
3_Member	CORUM	CORUM:320	55S ribosome, mitochondrial	-20.3578	-17.8775	26/77	7818,9801,10240,10884,11222,23107,28998,29088,29093,51073,51116,51253,54148,54948,56945,57129,64432,64928,64976,64978,65005,65008,65993,84311,124995,219927	DAP3,MRPL19,MRPS31,MRPS30,MRPL3,MRPS27,MRPL13,MRPL15,MRPL22,MRPL4,MRPS2,MRPL37,MRPL39,MRPL16,MRPS22,MRPL47,MRPS25,MRPL14,MRPL40,MRPL38,MRPL9,MRPL1,MRPS34,MRPL45,MRPL10,MRPL21
3_Member	CORUM	CORUM:324	39S ribosomal subunit, mitochondrial	-15.2277	-12.9157	18/48	9801,11222,28998,29088,29093,51073,51253,54148,54948,57129,64928,64976,64978,65005,65008,84311,124995,219927	MRPL19,MRPL3,MRPL13,MRPL15,MRPL22,MRPL4,MRPL37,MRPL39,MRPL16,MRPL47,MRPL14,MRPL40,MRPL38,MRPL9,MRPL1,MRPL45,MRPL10,MRPL21
3_Member	CORUM	CORUM:315	28S ribosomal subunit, mitochondrial	-5.91059	-4.22009	8/29	7818,10240,10884,23107,51116,56945,64432,65993	DAP3,MRPS31,MRPS30,MRPS27,MRPS2,MRPS22,MRPS25,MRPS34
4_Summary	GO Biological Processes	GO:0033365	protein localization to organelle	-30.0873	-27.4006	89/726	207,550,617,950,983,1020,1653,1654,2580,3329,3836,3837,3838,3839,3840,3843,3916,4436,4580,4734,4904,5018,5356,5469,5530,5534,5905,6135,6272,6728,6729,6741,7072,7514,7520,8027,8239,8729,8943,9131,9146,9183,9184,9349,9512,9694,9765,9868,9919,9972,10059,10073,10139,10312,10328,10452,10469,10525,10526,10527,10651,10762,10945,11021,11331,22930,23065,23203,23515,23633,23788,25777,25782,26985,30849,5505…	AKT1,AUP1,BCS1L,SCARB2,CDK1,CDK5,DDX1,DDX3X,GAK,HSPD1,KPNA1,KPNB1,KPNA2,KPNA3,KPNA4,IPO5,LAMP1,MSH2,MTX1,NEDD4,YBX1,OXA1L,PLRG1,MED1,PPP3CA,PPP3R1,RANGAP1,RPL11,SORT1,SRP19,SRP54,SSB,TIA1,XPO1,XRCC5,STAM,USP9X,GBF1,AP3D1,AIFM1,HGS,ZW10,BUB3,RPL23,PMPCB,EMC2,ZFYVE16,TOMM70,SEC16A,NUP153,DNM1L,SNUPN,ARFRP1,TCIRG1,EMC8,TOMM40,TIMM44,HYOU1,IPO8,IPO7,MTX2,NUP50,KDELR1,RAB35,PHB2,RAB3GAP1,EMC1,PMPCA,MO…
4_Member	GO Biological Processes	GO:0033365	protein localization to organelle	-30.0873	-27.4006	89/726	207,550,617,950,983,1020,1653,1654,2580,3329,3836,3837,3838,3839,3840,3843,3916,4436,4580,4734,4904,5018,5356,5469,5530,5534,5905,6135,6272,6728,6729,6741,7072,7514,7520,8027,8239,8729,8943,9131,9146,9183,9184,9349,9512,9694,9765,9868,9919,9972,10059,10073,10139,10312,10328,10452,10469,10525,10526,10527,10651,10762,10945,11021,11331,22930,23065,23203,23515,23633,23788,25777,25782,26985,30849,5505…	AKT1,AUP1,BCS1L,SCARB2,CDK1,CDK5,DDX1,DDX3X,GAK,HSPD1,KPNA1,KPNB1,KPNA2,KPNA3,KPNA4,IPO5,LAMP1,MSH2,MTX1,NEDD4,YBX1,OXA1L,PLRG1,MED1,PPP3CA,PPP3R1,RANGAP1,RPL11,SORT1,SRP19,SRP54,SSB,TIA1,XPO1,XRCC5,STAM,USP9X,GBF1,AP3D1,AIFM1,HGS,ZW10,BUB3,RPL23,PMPCB,EMC2,ZFYVE16,TOMM70,SEC16A,NUP153,DNM1L,SNUPN,ARFRP1,TCIRG1,EMC8,TOMM40,TIMM44,HYOU1,IPO8,IPO7,MTX2,NUP50,KDELR1,RAB35,PHB2,RAB3GAP1,EMC1,PMPCA,MO…
4_Member	GO Biological Processes	GO:0006886	intracellular protein transport	-28.607	-25.9565	85/696	160,161,162,163,164,207,537,550,617,738,950,1020,1173,1939,3313,3329,3836,3837,3838,3839,3840,3843,4580,4734,4905,5018,5469,5530,5534,6135,6272,6643,6728,6729,6812,7353,7514,8027,8239,8943,9131,9146,9349,9512,9765,9868,9919,9972,10053,10073,10139,10452,10469,10483,10525,10526,10527,10651,10762,10802,11140,11311,11331,22820,23203,23633,25782,26985,30849,50999,51014,51496,51699,53407,54662,55705,55…	AP2A1,AP2A2,AP1B1,AP2B1,AP1G1,AKT1,ATP6AP1,AUP1,BCS1L,VPS51,SCARB2,CDK5,AP2M1,EIF2D,HSPA9,HSPD1,KPNA1,KPNB1,KPNA2,KPNA3,KPNA4,IPO5,MTX1,NEDD4,NSF,OXA1L,MED1,PPP3CA,PPP3R1,RPL11,SORT1,SNX2,SRP19,SRP54,STXBP1,UFD1,XPO1,STAM,USP9X,AP3D1,AIFM1,HGS,RPL23,PMPCB,ZFYVE16,TOMM70,SEC16A,NUP153,AP1M2,SNUPN,ARFRP1,TOMM40,TIMM44,SEC23B,HYOU1,IPO8,IPO7,MTX2,NUP50,SEC24A,CDC37,VPS45,PHB2,COPG1,PMPCA,KPNA6,RAB3G…
4_Member	GO Biological Processes	GO:0072594	establishment of protein localization to organelle	-20.1013	-17.6327	50/346	207,617,950,3329,3836,3837,3838,3839,3840,3843,3916,4580,4734,5018,5469,5530,5534,6272,6728,6729,8027,8239,8943,9131,9146,9349,9512,9765,9868,9972,10073,10452,10469,10525,10526,10527,10651,10762,11331,22930,23203,23633,25782,26985,30849,55705,55750,92609,222229,100287932	AKT1,BCS1L,SCARB2,HSPD1,KPNA1,KPNB1,KPNA2,KPNA3,KPNA4,IPO5,LAMP1,MTX1,NEDD4,OXA1L,MED1,PPP3CA,PPP3R1,SORT1,SRP19,SRP54,STAM,USP9X,AP3D1,AIFM1,HGS,RPL23,PMPCB,ZFYVE16,TOMM70,NUP153,SNUPN,TOMM40,TIMM44,HYOU1,IPO8,IPO7,MTX2,NUP50,PHB2,RAB3GAP1,PMPCA,KPNA6,RAB3GAP2,AP3M1,PIK3R4,IPO9,AGK,TIMM50,LRWD1,TIMM23
4_Member	GO Biological Processes	GO:0006605	protein targeting	-9.18304	-7.15785	29/259	738,950,3329,4580,4734,6135,6272,6728,6729,8239,8943,9131,9146,9512,9765,9868,10053,10452,10469,10525,10651,11140,23203,26985,30849,55750,85377,92609,100287932	VPS51,SCARB2,HSPD1,MTX1,NEDD4,RPL11,SORT1,SRP19,SRP54,USP9X,AP3D1,AIFM1,HGS,PMPCB,ZFYVE16,TOMM70,AP1M2,TOMM40,TIMM44,HYOU1,MTX2,CDC37,PMPCA,AP3M1,PIK3R4,AGK,MICALL1,TIMM50,TIMM23
5_Summary	GO Biological Processes	GO:0016071	mRNA metabolic process	-29.8767	-27.1993	82/623	988,1477,1478,1653,1655,2332,2926,3185,3187,3190,3646,4670,4686,4841,4904,5094,5356,5469,5976,6256,6426,6427,6428,6430,6431,6741,7072,7307,7536,8449,8570,9238,9416,9584,9733,9785,9879,9991,10283,10421,10521,10657,10658,11168,11218,11273,11338,22803,22827,22828,22894,23019,23028,23398,23517,25904,25929,26986,27044,27339,29101,29883,50628,51441,51605,51692,51747,54439,54845,54888,54931,55192,55280,…	CDC5L,CSTF1,CSTF2,DDX1,DDX5,FMR1,GRSF1,HNRNPF,HNRNPH1,HNRNPK,EIF3E,HNRNPM,NCBP1,NONO,YBX1,PCBP2,PLRG1,MED1,UPF1,RXRA,SRSF1,SRSF2,SRSF3,SRSF5,SRSF6,SSB,TIA1,U2AF1,SF1,DHX16,KHSRP,TBRG4,DDX23,RBM39,SART3,DHX38,DDX46,PTBP3,CWC27,CD2BP2,DDX17,KHDRBS1,CELF1,PSIP1,DDX20,ATXN2L,U2AF2,XRN2,PUF60,SCAF8,DIS3,CNOT1,KDM1A,PPWD1,MTREX,CNOT10,GEMIN5,PABPC1,SND1,PRPF19,SSU72,CNOT7,GEMIN4,YTHDF2,TRMT6,CPSF3,LUC7…
5_Member	GO Biological Processes	GO:0016071	mRNA metabolic process	-29.8767	-27.1993	82/623	988,1477,1478,1653,1655,2332,2926,3185,3187,3190,3646,4670,4686,4841,4904,5094,5356,5469,5976,6256,6426,6427,6428,6430,6431,6741,7072,7307,7536,8449,8570,9238,9416,9584,9733,9785,9879,9991,10283,10421,10521,10657,10658,11168,11218,11273,11338,22803,22827,22828,22894,23019,23028,23398,23517,25904,25929,26986,27044,27339,29101,29883,50628,51441,51605,51692,51747,54439,54845,54888,54931,55192,55280,…	CDC5L,CSTF1,CSTF2,DDX1,DDX5,FMR1,GRSF1,HNRNPF,HNRNPH1,HNRNPK,EIF3E,HNRNPM,NCBP1,NONO,YBX1,PCBP2,PLRG1,MED1,UPF1,RXRA,SRSF1,SRSF2,SRSF3,SRSF5,SRSF6,SSB,TIA1,U2AF1,SF1,DHX16,KHSRP,TBRG4,DDX23,RBM39,SART3,DHX38,DDX46,PTBP3,CWC27,CD2BP2,DDX17,KHDRBS1,CELF1,PSIP1,DDX20,ATXN2L,U2AF2,XRN2,PUF60,SCAF8,DIS3,CNOT1,KDM1A,PPWD1,MTREX,CNOT10,GEMIN5,PABPC1,SND1,PRPF19,SSU72,CNOT7,GEMIN4,YTHDF2,TRMT6,CPSF3,LUC7…
5_Member	GO Biological Processes	GO:0006397	mRNA processing	-24.3187	-21.7326	64/467	988,1477,1478,1653,1655,2332,2926,3185,3187,3190,4670,4686,4841,4904,5356,6426,6427,6428,6430,6431,7072,7307,7536,8449,8570,9238,9416,9584,9733,9785,9879,9991,10283,10421,10521,10657,10658,11168,11218,11338,22803,22827,22828,23028,23398,23517,25929,26986,27339,29101,50628,51692,51747,54439,54845,55192,55280,55596,55677,56949,79577,79869,92906,201626	CDC5L,CSTF1,CSTF2,DDX1,DDX5,FMR1,GRSF1,HNRNPF,HNRNPH1,HNRNPK,HNRNPM,NCBP1,NONO,YBX1,PLRG1,SRSF1,SRSF2,SRSF3,SRSF5,SRSF6,TIA1,U2AF1,SF1,DHX16,KHSRP,TBRG4,DDX23,RBM39,SART3,DHX38,DDX46,PTBP3,CWC27,CD2BP2,DDX17,KHDRBS1,CELF1,PSIP1,DDX20,U2AF2,XRN2,PUF60,SCAF8,KDM1A,PPWD1,MTREX,GEMIN5,PABPC1,PRPF19,SSU72,GEMIN4,CPSF3,LUC7L3,RBM27,ESRP1,DNAJC17,CWF19L1,ZCCHC8,IWS1,XAB2,CDC73,CPSF7,HNRNPLL,PDE12
5_Member	WikiPathways	WP411	mRNA processing	-20.6239	-18.1133	32/126	1477,1478,1653,2521,3187,3188,3190,3276,4670,4686,4841,4904,5094,5430,5496,6426,6427,6428,6430,6431,6729,6829,7307,8449,9584,9785,10421,10658,11218,11338,22803,51692	CSTF1,CSTF2,DDX1,FUS,HNRNPH1,HNRNPH2,HNRNPK,PRMT1,HNRNPM,NCBP1,NONO,YBX1,PCBP2,POLR2A,PPM1G,SRSF1,SRSF2,SRSF3,SRSF5,SRSF6,SRP54,SUPT5H,U2AF1,DHX16,RBM39,DHX38,CD2BP2,CELF1,DDX20,U2AF2,XRN2,CPSF3
5_Member	GO Biological Processes	GO:0008380	RNA splicing	-20.5776	-18.0733	54/394	988,1653,1655,2332,2521,3185,3187,3190,3276,4670,4686,4841,4904,5356,6426,6427,6428,6430,6431,7072,7307,7536,8148,8449,8570,9416,9584,9733,9785,9879,9991,10283,10421,10521,10658,11168,11218,11338,22827,23028,23398,23517,25929,26986,27339,50628,51493,51747,54845,55192,55280,55596,55677,56949	CDC5L,DDX1,DDX5,FMR1,FUS,HNRNPF,HNRNPH1,HNRNPK,PRMT1,HNRNPM,NCBP1,NONO,YBX1,PLRG1,SRSF1,SRSF2,SRSF3,SRSF5,SRSF6,TIA1,U2AF1,SF1,TAF15,DHX16,KHSRP,DDX23,RBM39,SART3,DHX38,DDX46,PTBP3,CWC27,CD2BP2,DDX17,CELF1,PSIP1,DDX20,U2AF2,PUF60,KDM1A,PPWD1,MTREX,GEMIN5,PABPC1,PRPF19,GEMIN4,RTCB,LUC7L3,ESRP1,DNAJC17,CWF19L1,ZCCHC8,IWS1,XAB2
5_Member	Reactome Gene Sets	R-HSA-72203	Processing of Capped Intron-Containing Pre-mRNA	-19.7018	-17.2499	45/285	988,1477,1478,1655,1977,2521,3185,3187,3188,3190,4670,4686,4904,5093,5094,5356,5430,6426,6427,6428,6430,6431,7307,7536,8449,9416,9584,9785,9818,9879,9972,10283,10762,11325,11338,22827,23350,23398,23517,27339,51692,51747,56949,79869,85313	CDC5L,CSTF1,CSTF2,DDX5,EIF4E,FUS,HNRNPF,HNRNPH1,HNRNPH2,HNRNPK,HNRNPM,NCBP1,YBX1,PCBP1,PCBP2,PLRG1,POLR2A,SRSF1,SRSF2,SRSF3,SRSF5,SRSF6,U2AF1,SF1,DHX16,DDX23,RBM39,DHX38,NUP58,DDX46,NUP153,CWC27,NUP50,DDX42,U2AF2,PUF60,U2SURP,PPWD1,MTREX,PRPF19,CPSF3,LUC7L3,XAB2,CPSF7,PPIL4
5_Member	CORUM	CORUM:351	Spliceosome	-19.0235	-16.5931	32/141	988,1153,1654,1655,4343,4686,5356,5496,6426,6427,6428,6430,6431,7307,7536,8449,9416,9584,9785,9879,10421,10521,10643,11338,22827,23350,23398,23517,26986,27339,51747,56949	CDC5L,CIRBP,DDX3X,DDX5,MOV10,NCBP1,PLRG1,PPM1G,SRSF1,SRSF2,SRSF3,SRSF5,SRSF6,U2AF1,SF1,DHX16,DDX23,RBM39,DHX38,DDX46,CD2BP2,DDX17,IGF2BP3,U2AF2,PUF60,U2SURP,PPWD1,MTREX,PABPC1,PRPF19,LUC7L3,XAB2
5_Member	Reactome Gene Sets	R-HSA-72163	mRNA Splicing - Major Pathway	-18.1527	-15.7527	37/207	988,1655,2521,3185,3187,3188,3190,4670,4686,4904,5093,5094,5356,5430,6426,6427,6428,6430,6431,7307,7536,8449,9416,9584,9785,9879,10283,11325,11338,22827,23350,23398,23517,27339,51747,56949,85313	CDC5L,DDX5,FUS,HNRNPF,HNRNPH1,HNRNPH2,HNRNPK,HNRNPM,NCBP1,YBX1,PCBP1,PCBP2,PLRG1,POLR2A,SRSF1,SRSF2,SRSF3,SRSF5,SRSF6,U2AF1,SF1,DHX16,DDX23,RBM39,DHX38,DDX46,CWC27,DDX42,U2AF2,PUF60,U2SURP,PPWD1,MTREX,PRPF19,LUC7L3,XAB2,PPIL4
5_Member	GO Biological Processes	GO:0000375	RNA splicing, via transesterification reactions	-18.1167	-15.7215	42/271	988,1653,1655,3185,3187,3190,4670,4686,5356,6426,6427,6428,6430,6431,7307,7536,8449,8570,9416,9733,9785,9879,10283,10421,10521,10658,11168,11218,11338,22827,23028,23398,23517,25929,26986,27339,50628,51747,55192,55280,55596,56949	CDC5L,DDX1,DDX5,HNRNPF,HNRNPH1,HNRNPK,HNRNPM,NCBP1,PLRG1,SRSF1,SRSF2,SRSF3,SRSF5,SRSF6,U2AF1,SF1,DHX16,KHSRP,DDX23,SART3,DHX38,DDX46,CWC27,CD2BP2,DDX17,CELF1,PSIP1,DDX20,U2AF2,PUF60,KDM1A,PPWD1,MTREX,GEMIN5,PABPC1,PRPF19,GEMIN4,LUC7L3,DNAJC17,CWF19L1,ZCCHC8,XAB2
5_Member	Reactome Gene Sets	R-HSA-72172	mRNA Splicing	-17.5803	-15.1946	37/215	988,1655,2521,3185,3187,3188,3190,4670,4686,4904,5093,5094,5356,5430,6426,6427,6428,6430,6431,7307,7536,8449,9416,9584,9785,9879,10283,11325,11338,22827,23350,23398,23517,27339,51747,56949,85313	CDC5L,DDX5,FUS,HNRNPF,HNRNPH1,HNRNPH2,HNRNPK,HNRNPM,NCBP1,YBX1,PCBP1,PCBP2,PLRG1,POLR2A,SRSF1,SRSF2,SRSF3,SRSF5,SRSF6,U2AF1,SF1,DHX16,DDX23,RBM39,DHX38,DDX46,CWC27,DDX42,U2AF2,PUF60,U2SURP,PPWD1,MTREX,PRPF19,LUC7L3,XAB2,PPIL4
5_Member	GO Biological Processes	GO:0000377	RNA splicing, via transesterification reactions with bulged adenosine as nucleophile	-17.5504	-15.1787	41/267	988,1653,1655,3185,3187,3190,4670,4686,5356,6426,6427,6428,6430,6431,7307,7536,8449,9416,9733,9785,9879,10283,10421,10521,10658,11168,11218,11338,22827,23028,23398,23517,25929,26986,27339,50628,51747,55192,55280,55596,56949	CDC5L,DDX1,DDX5,HNRNPF,HNRNPH1,HNRNPK,HNRNPM,NCBP1,PLRG1,SRSF1,SRSF2,SRSF3,SRSF5,SRSF6,U2AF1,SF1,DHX16,DDX23,SART3,DHX38,DDX46,CWC27,CD2BP2,DDX17,CELF1,PSIP1,DDX20,U2AF2,PUF60,KDM1A,PPWD1,MTREX,GEMIN5,PABPC1,PRPF19,GEMIN4,LUC7L3,DNAJC17,CWF19L1,ZCCHC8,XAB2
5_Member	GO Biological Processes	GO:0000398	mRNA splicing, via spliceosome	-17.5504	-15.1787	41/267	988,1653,1655,3185,3187,3190,4670,4686,5356,6426,6427,6428,6430,6431,7307,7536,8449,9416,9733,9785,9879,10283,10421,10521,10658,11168,11218,11338,22827,23028,23398,23517,25929,26986,27339,50628,51747,55192,55280,55596,56949	CDC5L,DDX1,DDX5,HNRNPF,HNRNPH1,HNRNPK,HNRNPM,NCBP1,PLRG1,SRSF1,SRSF2,SRSF3,SRSF5,SRSF6,U2AF1,SF1,DHX16,DDX23,SART3,DHX38,DDX46,CWC27,CD2BP2,DDX17,CELF1,PSIP1,DDX20,U2AF2,PUF60,KDM1A,PPWD1,MTREX,GEMIN5,PABPC1,PRPF19,GEMIN4,LUC7L3,DNAJC17,CWF19L1,ZCCHC8,XAB2
5_Member	CORUM	CORUM:1181	C complex spliceosome	-11.0192	-8.88721	18/79	988,1655,3185,3187,3190,4670,5356,6426,7307,9416,9785,10283,23398,23517,26986,27339,55596,56949	CDC5L,DDX5,HNRNPF,HNRNPH1,HNRNPK,HNRNPM,PLRG1,SRSF1,U2AF1,DDX23,DHX38,CWC27,PPWD1,MTREX,PABPC1,PRPF19,ZCCHC8,XAB2
5_Member	KEGG Pathway	hsa03040	Spliceosome	-10.6818	-8.57786	24/154	988,1655,2521,3190,4670,4686,5093,5356,6426,6427,6428,6430,6431,7307,8449,9416,9785,9879,11325,11338,22827,23350,27339,56949	CDC5L,DDX5,FUS,HNRNPK,HNRNPM,NCBP1,PCBP1,PLRG1,SRSF1,SRSF2,SRSF3,SRSF5,SRSF6,U2AF1,DHX16,DDX23,DHX38,DDX46,DDX42,U2AF2,PUF60,U2SURP,PRPF19,XAB2
5_Member	Reactome Gene Sets	R-HSA-72187	mRNA 3'-end processing	-7.94527	-6.06267	13/59	1477,1478,4686,6426,6427,6428,6430,6431,7307,9785,11338,51692,79869	CSTF1,CSTF2,NCBP1,SRSF1,SRSF2,SRSF3,SRSF5,SRSF6,U2AF1,DHX38,U2AF2,CPSF3,CPSF7
5_Member	Reactome Gene Sets	R-HSA-73856	RNA Polymerase II Transcription Termination	-7.16065	-5.34647	13/68	1477,1478,4686,6426,6427,6428,6430,6431,7307,9785,11338,51692,79869	CSTF1,CSTF2,NCBP1,SRSF1,SRSF2,SRSF3,SRSF5,SRSF6,U2AF1,DHX38,U2AF2,CPSF3,CPSF7
5_Member	Reactome Gene Sets	R-HSA-72202	Transport of Mature Transcript to Cytoplasm	-6.8767	-5.09308	14/84	1977,4686,6426,6427,6428,6430,6431,7307,9785,9818,9972,10762,11338,51692	EIF4E,NCBP1,SRSF1,SRSF2,SRSF3,SRSF5,SRSF6,U2AF1,DHX38,NUP58,NUP153,NUP50,U2AF2,CPSF3
5_Member	Reactome Gene Sets	R-HSA-159236	Transport of Mature mRNA derived from an Intron-Containing Transcript	-5.78638	-4.10901	12/75	4686,6426,6427,6428,6430,6431,7307,9785,9818,9972,10762,11338	NCBP1,SRSF1,SRSF2,SRSF3,SRSF5,SRSF6,U2AF1,DHX38,NUP58,NUP153,NUP50,U2AF2
5_Member	Reactome Gene Sets	R-HSA-72165	mRNA Splicing - Minor Pathway	-4.04751	-2.6166	8/50	4686,4904,5430,6426,6427,6431,9416,11325	NCBP1,YBX1,POLR2A,SRSF1,SRSF2,SRSF6,DDX23,DDX42
6_Summary	GO Biological Processes	GO:0022613	ribonucleoprotein complex biogenesis	-28.2583	-25.6164	69/466	1653,1654,1939,1968,3646,4686,5591,6125,6128,6129,6134,6135,6147,6154,6201,6202,6203,6208,6209,6217,6218,6232,6426,6430,6431,7514,7520,7536,8451,8661,8662,8663,8664,8667,9045,9416,9733,9879,10360,10421,10514,10521,10658,10728,10799,11168,11218,22803,22827,22868,22894,22907,23195,23517,25929,27335,27339,29093,50628,51106,51116,51386,51747,55341,55781,56949,79577,79869,90441,3831,55192	DDX1,DDX3X,EIF2D,EIF2S3,EIF3E,NCBP1,PRKDC,RPL5,RPL6,RPL7,RPL10,RPL11,RPL23A,RPL26,RPS7,RPS8,RPS9,RPS14,RPS15,RPS16,RPS17,RPS27,SRSF1,SRSF5,SRSF6,XPO1,XRCC5,SF1,CUL4A,EIF3A,EIF3B,EIF3C,EIF3D,EIF3H,RPL14,DDX23,SART3,DDX46,NPM3,CD2BP2,MYBBP1A,DDX17,CELF1,PTGES3,RPP40,PSIP1,DDX20,XRN2,PUF60,FASTKD2,DIS3,DHX30,MDN1,MTREX,GEMIN5,EIF3K,PRPF19,MRPL22,GEMIN4,TFB1M,MRPS2,EIF3L,LUC7L3,LSG1,RIOK2,XAB2,CDC73,…
6_Member	GO Biological Processes	GO:0022613	ribonucleoprotein complex biogenesis	-28.2583	-25.6164	69/466	1653,1654,1939,1968,3646,4686,5591,6125,6128,6129,6134,6135,6147,6154,6201,6202,6203,6208,6209,6217,6218,6232,6426,6430,6431,7514,7520,7536,8451,8661,8662,8663,8664,8667,9045,9416,9733,9879,10360,10421,10514,10521,10658,10728,10799,11168,11218,22803,22827,22868,22894,22907,23195,23517,25929,27335,27339,29093,50628,51106,51116,51386,51747,55341,55781,56949,79577,79869,90441	DDX1,DDX3X,EIF2D,EIF2S3,EIF3E,NCBP1,PRKDC,RPL5,RPL6,RPL7,RPL10,RPL11,RPL23A,RPL26,RPS7,RPS8,RPS9,RPS14,RPS15,RPS16,RPS17,RPS27,SRSF1,SRSF5,SRSF6,XPO1,XRCC5,SF1,CUL4A,EIF3A,EIF3B,EIF3C,EIF3D,EIF3H,RPL14,DDX23,SART3,DDX46,NPM3,CD2BP2,MYBBP1A,DDX17,CELF1,PTGES3,RPP40,PSIP1,DDX20,XRN2,PUF60,FASTKD2,DIS3,DHX30,MDN1,MTREX,GEMIN5,EIF3K,PRPF19,MRPL22,GEMIN4,TFB1M,MRPS2,EIF3L,LUC7L3,LSG1,RIOK2,XAB2,CDC73,…
6_Member	GO Biological Processes	GO:0071826	ribonucleoprotein complex subunit organization	-25.0253	-22.424	47/236	1653,1939,1968,3646,3831,4686,5591,6125,6128,6134,6135,6147,6208,6209,6232,6426,6430,6431,7520,7536,8661,8662,8663,8664,8667,9416,9733,9879,10421,10658,10728,11168,11218,22827,22868,22907,23195,25929,27335,27339,50628,51386,51747,55192,56949,79577,79869	DDX1,EIF2D,EIF2S3,EIF3E,KLC1,NCBP1,PRKDC,RPL5,RPL6,RPL10,RPL11,RPL23A,RPS14,RPS15,RPS27,SRSF1,SRSF5,SRSF6,XRCC5,SF1,EIF3A,EIF3B,EIF3C,EIF3D,EIF3H,DDX23,SART3,DDX46,CD2BP2,CELF1,PTGES3,PSIP1,DDX20,PUF60,FASTKD2,DHX30,MDN1,GEMIN5,EIF3K,PRPF19,GEMIN4,EIF3L,LUC7L3,DNAJC17,XAB2,CDC73,CPSF7
6_Member	GO Biological Processes	GO:0022618	ribonucleoprotein complex assembly	-23.8106	-21.2392	45/228	1653,1939,1968,3646,4686,5591,6125,6128,6134,6135,6147,6208,6209,6232,6426,6430,6431,7520,7536,8661,8662,8663,8664,8667,9416,9733,9879,10421,10658,10728,11168,11218,22827,22868,22907,23195,25929,27335,27339,50628,51386,51747,56949,79577,79869	DDX1,EIF2D,EIF2S3,EIF3E,NCBP1,PRKDC,RPL5,RPL6,RPL10,RPL11,RPL23A,RPS14,RPS15,RPS27,SRSF1,SRSF5,SRSF6,XRCC5,SF1,EIF3A,EIF3B,EIF3C,EIF3D,EIF3H,DDX23,SART3,DDX46,CD2BP2,CELF1,PTGES3,PSIP1,DDX20,PUF60,FASTKD2,DHX30,MDN1,GEMIN5,EIF3K,PRPF19,GEMIN4,EIF3L,LUC7L3,XAB2,CDC73,CPSF7
7_Summary	Reactome Gene Sets	R-HSA-199991	Membrane Trafficking	-22.3405	-19.7834	72/634	160,161,162,163,164,207,408,738,950,1062,1075,1173,1522,1604,1781,2060,2348,2580,2799,2801,3482,3796,3831,4124,4905,5286,5537,5872,6272,6457,6643,6714,7277,8027,8301,8729,8773,9146,9183,9919,10053,10096,10097,10109,10121,10139,10671,10802,10945,10960,11021,11311,22820,22848,22930,23243,25782,29978,50618,51014,53407,54662,55357,55707,55770,55860,58485,58513,60561,60684,81567,375056,10525,3916,8943…	AP2A1,AP2A2,AP1B1,AP2B1,AP1G1,AKT1,ARRB1,VPS51,SCARB2,CENPE,CTSC,AP2M1,CTSZ,CD55,DYNC1I2,EPS15,FOLR1,GAK,GNS,GOLGA2,IGF2R,KIF2A,KLC1,MAN2A1,NSF,PIK3C2A,PPP6C,RAB13,SORT1,SH3GL3,SNX2,SRC,TUBA4A,STAM,PICALM,GBF1,SNAP23,HGS,ZW10,SEC16A,AP1M2,ACTR3,ACTR2,ARPC2,ACTR1A,ARFRP1,DCTN6,SEC24A,KDELR1,LMAN2,RAB35,VPS45,COPG1,AAK1,RAB3GAP1,ANKRD28,RAB3GAP2,UBQLN2,ITSN2,TMED7,STX18,TBC1D13,TBC1D2,NECAP2,EXOC2,…
7_Member	Reactome Gene Sets	R-HSA-199991	Membrane Trafficking	-22.3405	-19.7834	72/634	160,161,162,163,164,207,408,738,950,1062,1075,1173,1522,1604,1781,2060,2348,2580,2799,2801,3482,3796,3831,4124,4905,5286,5537,5872,6272,6457,6643,6714,7277,8027,8301,8729,8773,9146,9183,9919,10053,10096,10097,10109,10121,10139,10671,10802,10945,10960,11021,11311,22820,22848,22930,23243,25782,29978,50618,51014,53407,54662,55357,55707,55770,55860,58485,58513,60561,60684,81567,375056	AP2A1,AP2A2,AP1B1,AP2B1,AP1G1,AKT1,ARRB1,VPS51,SCARB2,CENPE,CTSC,AP2M1,CTSZ,CD55,DYNC1I2,EPS15,FOLR1,GAK,GNS,GOLGA2,IGF2R,KIF2A,KLC1,MAN2A1,NSF,PIK3C2A,PPP6C,RAB13,SORT1,SH3GL3,SNX2,SRC,TUBA4A,STAM,PICALM,GBF1,SNAP23,HGS,ZW10,SEC16A,AP1M2,ACTR3,ACTR2,ARPC2,ACTR1A,ARFRP1,DCTN6,SEC24A,KDELR1,LMAN2,RAB35,VPS45,COPG1,AAK1,RAB3GAP1,ANKRD28,RAB3GAP2,UBQLN2,ITSN2,TMED7,STX18,TBC1D13,TBC1D2,NECAP2,EXOC2,…
7_Member	Reactome Gene Sets	R-HSA-5653656	Vesicle-mediated transport	-21.4627	-18.9261	73/673	160,161,162,163,164,207,408,738,950,1062,1075,1173,1522,1604,1781,2060,2348,2580,2799,2801,3482,3796,3831,4124,4905,5286,5537,5872,6272,6457,6643,6714,7277,8027,8301,8729,8773,9146,9183,9919,10053,10096,10097,10109,10121,10139,10525,10671,10802,10945,10960,11021,11311,22820,22848,22930,23243,25782,29978,50618,51014,53407,54662,55357,55707,55770,55860,58485,58513,60561,60684,81567,375056	AP2A1,AP2A2,AP1B1,AP2B1,AP1G1,AKT1,ARRB1,VPS51,SCARB2,CENPE,CTSC,AP2M1,CTSZ,CD55,DYNC1I2,EPS15,FOLR1,GAK,GNS,GOLGA2,IGF2R,KIF2A,KLC1,MAN2A1,NSF,PIK3C2A,PPP6C,RAB13,SORT1,SH3GL3,SNX2,SRC,TUBA4A,STAM,PICALM,GBF1,SNAP23,HGS,ZW10,SEC16A,AP1M2,ACTR3,ACTR2,ARPC2,ACTR1A,ARFRP1,HYOU1,DCTN6,SEC24A,KDELR1,LMAN2,RAB35,VPS45,COPG1,AAK1,RAB3GAP1,ANKRD28,RAB3GAP2,UBQLN2,ITSN2,TMED7,STX18,TBC1D13,TBC1D2,NECAP2,…
7_Member	GO Biological Processes	GO:0048193	Golgi vesicle transport	-12.3352	-10.153	35/280	160,164,738,2060,2580,2801,3916,4905,5537,5872,6272,6643,8729,8773,8943,9183,9919,10139,10483,10525,10802,10945,10960,22820,23041,50999,51014,53407,55770,57410,58485,60561,60684,79585,375056	AP2A1,AP1G1,VPS51,EPS15,GAK,GOLGA2,LAMP1,NSF,PPP6C,RAB13,SORT1,SNX2,GBF1,SNAP23,AP3D1,ZW10,SEC16A,ARFRP1,SEC23B,HYOU1,SEC24A,KDELR1,LMAN2,COPG1,MON2,TMED5,TMED7,STX18,EXOC2,SCYL1,TRAPPC1,RINT1,TRAPPC11,CORO7,MIA3
7_Member	Reactome Gene Sets	R-HSA-199977	ER to Golgi Anterograde Transport	-9.10301	-7.08565	22/154	1075,1522,1604,1781,2348,2801,4905,5537,7277,8729,9919,10121,10671,10802,10945,10960,22820,23243,51014,55860,58485,375056	CTSC,CTSZ,CD55,DYNC1I2,FOLR1,GOLGA2,NSF,PPP6C,TUBA4A,GBF1,SEC16A,ACTR1A,DCTN6,SEC24A,KDELR1,LMAN2,COPG1,ANKRD28,TMED7,ACTR10,TRAPPC1,MIA3
7_Member	Reactome Gene Sets	R-HSA-948021	Transport to the Golgi and subsequent modification	-8.99566	-6.99449	24/185	1075,1522,1604,1781,2348,2683,2801,4124,4905,5537,7277,8729,9919,10121,10671,10802,10945,10960,22820,23243,51014,55860,58485,375056	CTSC,CTSZ,CD55,DYNC1I2,FOLR1,B4GALT1,GOLGA2,MAN2A1,NSF,PPP6C,TUBA4A,GBF1,SEC16A,ACTR1A,DCTN6,SEC24A,KDELR1,LMAN2,COPG1,ANKRD28,TMED7,ACTR10,TRAPPC1,MIA3
7_Member	Reactome Gene Sets	R-HSA-446203	Asparagine N-linked glycosylation	-8.76641	-6.78801	31/304	1075,1522,1604,1781,2348,2673,2683,2720,2801,4124,4905,5537,7277,8729,9919,10121,10671,10802,10945,10960,11253,22820,22845,23243,51014,51035,55860,56052,58485,375056,440138	CTSC,CTSZ,CD55,DYNC1I2,FOLR1,GFPT1,B4GALT1,GLB1,GOLGA2,MAN2A1,NSF,PPP6C,TUBA4A,GBF1,SEC16A,ACTR1A,DCTN6,SEC24A,KDELR1,LMAN2,MAN1B1,COPG1,DOLK,ANKRD28,TMED7,UBXN1,ACTR10,ALG1,TRAPPC1,MIA3,ALG11
7_Member	Reactome Gene Sets	R-HSA-6811442	Intra-Golgi and retrograde Golgi-to-ER traffic	-7.55681	-5.70149	23/202	738,1062,1781,3482,3796,3831,4124,4905,7277,8729,9183,10121,10139,10671,10945,11311,22820,22930,25782,51014,53407,55860,60561	VPS51,CENPE,DYNC1I2,IGF2R,KIF2A,KLC1,MAN2A1,NSF,TUBA4A,GBF1,ZW10,ACTR1A,ARFRP1,DCTN6,KDELR1,VPS45,COPG1,RAB3GAP1,RAB3GAP2,TMED7,STX18,ACTR10,RINT1
7_Member	Reactome Gene Sets	R-HSA-8856688	Golgi-to-ER retrograde transport	-7.19731	-5.38186	18/133	1062,1781,3796,3831,4905,7277,8729,9183,10121,10671,10945,22820,22930,25782,51014,53407,55860,60561	CENPE,DYNC1I2,KIF2A,KLC1,NSF,TUBA4A,GBF1,ZW10,ACTR1A,DCTN6,KDELR1,COPG1,RAB3GAP1,RAB3GAP2,TMED7,STX18,ACTR10,RINT1
7_Member	GO Biological Processes	GO:0006888	endoplasmic reticulum to Golgi vesicle-mediated transport	-6.91649	-5.12931	17/124	2801,5537,8729,9183,9919,10483,10525,10802,10945,10960,22820,50999,51014,58485,60561,60684,375056	GOLGA2,PPP6C,GBF1,ZW10,SEC16A,SEC23B,HYOU1,SEC24A,KDELR1,LMAN2,COPG1,TMED5,TMED7,TRAPPC1,RINT1,TRAPPC11,MIA3
7_Member	Reactome Gene Sets	R-HSA-6807878	COPI-mediated anterograde transport	-5.12814	-3.53379	13/101	1604,1781,2348,2801,4905,7277,8729,10121,10671,10945,22820,51014,55860	CD55,DYNC1I2,FOLR1,GOLGA2,NSF,TUBA4A,GBF1,ACTR1A,DCTN6,KDELR1,COPG1,TMED7,ACTR10
7_Member	Reactome Gene Sets	R-HSA-6811434	COPI-dependent Golgi-to-ER retrograde traffic	-4.51388	-3.01321	12/99	1062,3796,3831,4905,7277,8729,9183,10945,22820,51014,53407,60561	CENPE,KIF2A,KLC1,NSF,TUBA4A,GBF1,ZW10,KDELR1,COPG1,TMED7,STX18,RINT1
7_Member	GO Biological Processes	GO:0007030	Golgi organization	-4.11498	-2.66806	14/143	738,983,998,2580,2801,8729,9183,9919,10565,23122,50999,51014,60684,79585	VPS51,CDK1,CDC42,GAK,GOLGA2,GBF1,ZW10,SEC16A,ARFGEF1,CLASP2,TMED5,TMED7,TRAPPC11,CORO7
8_Summary	GO Biological Processes	GO:0006259	DNA metabolic process	-22.31	-19.7599	80/770	142,983,988,1017,1022,1025,1108,1642,1653,1786,2140,2271,2332,2547,2956,3159,3329,3838,3978,3980,4172,4173,4174,4175,4176,4361,4436,4841,5424,5591,5813,5928,5931,5965,5976,5982,5983,5984,5985,6188,6714,6742,6749,7153,7515,7520,7555,7874,8208,8451,8467,9093,9100,9112,9361,9730,10075,10155,10728,11198,11284,22803,23198,23244,23347,23376,23595,23646,25939,26073,27000,27339,29947,54815,55183,55215,56…	PARP1,CDK1,CDC5L,CDK2,CDK7,CDK9,CHD4,DDB1,DDX1,DNMT1,EYA3,FH,FMR1,XRCC6,MSH6,HMGA1,HSPD1,KPNA2,LIG1,LIG3,MCM3,MCM4,MCM5,MCM6,MCM7,MRE11,MSH2,NONO,POLD1,PRKDC,PURA,RBBP4,RBBP7,RECQL,UPF1,RFC2,RFC3,RFC4,RFC5,RPS3,SRC,SSBP1,SSRP1,TOP2A,XRCC1,XRCC5,CNBP,USP7,CHAF1B,CUL4A,SMARCA5,DNAJA3,USP10,MTA1,LONP1,DCAF1,HUWE1,TRIM28,PTGES3,SUPT16H,PNKP,XRN2,PSME4,PDS5A,SMCHD1,UFL1,ORC3,PLD3,SAMHD1,POLDIP2,DNAJC2…
8_Member	GO Biological Processes	GO:0006259	DNA metabolic process	-22.31	-19.7599	80/770	142,983,988,1017,1022,1025,1108,1642,1653,1786,2140,2271,2332,2547,2956,3159,3329,3838,3978,3980,4172,4173,4174,4175,4176,4361,4436,4841,5424,5591,5813,5928,5931,5965,5976,5982,5983,5984,5985,6188,6714,6742,6749,7153,7515,7520,7555,7874,8208,8451,8467,9093,9100,9112,9361,9730,10075,10155,10728,11198,11284,22803,23198,23244,23347,23376,23595,23646,25939,26073,27000,27339,29947,54815,55183,55215,56…	PARP1,CDK1,CDC5L,CDK2,CDK7,CDK9,CHD4,DDB1,DDX1,DNMT1,EYA3,FH,FMR1,XRCC6,MSH6,HMGA1,HSPD1,KPNA2,LIG1,LIG3,MCM3,MCM4,MCM5,MCM6,MCM7,MRE11,MSH2,NONO,POLD1,PRKDC,PURA,RBBP4,RBBP7,RECQL,UPF1,RFC2,RFC3,RFC4,RFC5,RPS3,SRC,SSBP1,SSRP1,TOP2A,XRCC1,XRCC5,CNBP,USP7,CHAF1B,CUL4A,SMARCA5,DNAJA3,USP10,MTA1,LONP1,DCAF1,HUWE1,TRIM28,PTGES3,SUPT16H,PNKP,XRN2,PSME4,PDS5A,SMCHD1,UFL1,ORC3,PLD3,SAMHD1,POLDIP2,DNAJC2…
8_Member	GO Biological Processes	GO:0006281	DNA repair	-18.7915	-16.3663	58/493	142,983,988,1017,1022,1025,1108,1642,1653,2140,2271,2332,2547,2956,3978,3980,4172,4173,4174,4175,4176,4361,4436,4841,5424,5591,5965,5976,5982,5983,5984,5985,6188,6749,7515,7520,7874,8208,8451,8467,9100,9112,10075,10155,11198,11284,23198,23244,23347,23376,25939,26073,27339,55183,55215,56916,56949,79621	PARP1,CDK1,CDC5L,CDK2,CDK7,CDK9,CHD4,DDB1,DDX1,EYA3,FH,FMR1,XRCC6,MSH6,LIG1,LIG3,MCM3,MCM4,MCM5,MCM6,MCM7,MRE11,MSH2,NONO,POLD1,PRKDC,RECQL,UPF1,RFC2,RFC3,RFC4,RFC5,RPS3,SSRP1,XRCC1,XRCC5,USP7,CHAF1B,CUL4A,SMARCA5,USP10,MTA1,HUWE1,TRIM28,SUPT16H,PNKP,PSME4,PDS5A,SMCHD1,UFL1,SAMHD1,POLDIP2,PRPF19,RIF1,FANCI,SMARCAD1,XAB2,RNASEH2B
8_Member	GO Biological Processes	GO:0006974	cellular response to DNA damage stimulus	-18.6178	-16.1978	72/736	142,598,983,988,1017,1022,1025,1108,1642,1653,2140,2271,2332,2547,2956,3162,3978,3980,4172,4173,4174,4175,4176,4361,4436,4734,4841,5424,5591,5929,5965,5976,5982,5983,5984,5985,6154,6188,6749,7153,7515,7520,7874,8208,8451,8467,9100,9112,10075,10155,11198,11284,11335,23028,23198,23244,23347,23376,23517,25939,26073,27339,27429,55183,55215,56916,56949,60561,79621,80854,84259,440275	PARP1,BCL2L1,CDK1,CDC5L,CDK2,CDK7,CDK9,CHD4,DDB1,DDX1,EYA3,FH,FMR1,XRCC6,MSH6,HMOX1,LIG1,LIG3,MCM3,MCM4,MCM5,MCM6,MCM7,MRE11,MSH2,NEDD4,NONO,POLD1,PRKDC,RBBP5,RECQL,UPF1,RFC2,RFC3,RFC4,RFC5,RPL26,RPS3,SSRP1,TOP2A,XRCC1,XRCC5,USP7,CHAF1B,CUL4A,SMARCA5,USP10,MTA1,HUWE1,TRIM28,SUPT16H,PNKP,CBX3,KDM1A,PSME4,PDS5A,SMCHD1,UFL1,MTREX,SAMHD1,POLDIP2,PRPF19,HTRA2,RIF1,FANCI,SMARCAD1,XAB2,RINT1,RNASEH2B,SE…
8_Member	GO Biological Processes	GO:0051052	regulation of DNA metabolic process	-13.8365	-11.5662	53/541	142,207,983,1017,1025,1499,2140,2521,2956,3836,3838,3980,4172,4173,4174,4175,4176,4361,4436,5591,5976,5982,5983,5984,5985,6188,6595,6602,6714,6742,6950,7515,7520,7874,7913,8239,8451,8467,9131,10097,10155,10728,10923,11284,23028,23244,23347,23595,26057,27000,29947,55183,56916	PARP1,AKT1,CDK1,CDK2,CDK9,CTNNB1,EYA3,FUS,MSH6,KPNA1,KPNA2,LIG3,MCM3,MCM4,MCM5,MCM6,MCM7,MRE11,MSH2,PRKDC,UPF1,RFC2,RFC3,RFC4,RFC5,RPS3,SMARCA2,SMARCD1,SRC,SSBP1,TCP1,XRCC1,XRCC5,USP7,DEK,USP9X,CUL4A,SMARCA5,AIFM1,ACTR2,TRIM28,PTGES3,SUB1,PNKP,KDM1A,PDS5A,SMCHD1,ORC3,ANKRD17,DNAJC2,DNMT3L,RIF1,SMARCAD1
8_Member	GO Biological Processes	GO:0051054	positive regulation of DNA metabolic process	-9.41209	-7.37437	32/303	142,207,983,1017,1499,2140,2521,4361,4436,5591,5982,5983,5984,5985,6188,6595,6602,6714,6742,6950,7515,7520,7874,8239,8467,10097,10155,10728,11284,23347,29947,55183	PARP1,AKT1,CDK1,CDK2,CTNNB1,EYA3,FUS,MRE11,MSH2,PRKDC,RFC2,RFC3,RFC4,RFC5,RPS3,SMARCA2,SMARCD1,SRC,SSBP1,TCP1,XRCC1,XRCC5,USP7,USP9X,SMARCA5,ACTR2,TRIM28,PTGES3,PNKP,SMCHD1,DNMT3L,RIF1
8_Member	GO Biological Processes	GO:0051053	negative regulation of DNA metabolic process	-4.47337	-2.97881	15/150	142,2956,3980,4436,6188,6714,7515,7520,10155,10923,23244,23347,27000,29947,55183	PARP1,MSH6,LIG3,MSH2,RPS3,SRC,XRCC1,XRCC5,TRIM28,SUB1,PDS5A,SMCHD1,DNAJC2,DNMT3L,RIF1
9_Summary	GO Biological Processes	GO:0007005	mitochondrion organization	-21.7059	-19.1626	59/445	142,207,292,293,598,617,1020,1267,3028,3313,3329,4124,4540,4580,4702,4705,4709,4722,4728,4976,5018,6548,6742,7386,9093,9131,9361,9512,9868,10059,10105,10452,10469,10651,10730,10989,11331,23203,23277,25994,26073,27429,28976,29078,51204,54927,55210,55572,55735,55737,55750,81554,81892,83858,92609,93974,117145,126328,100287932,1468,10165,23456,9414	PARP1,AKT1,SLC25A5,SLC25A6,BCL2L1,BCS1L,CDK5,CNP,HSD17B10,HSPA9,HSPD1,MAN2A1,ND5,MTX1,NDUFA8,NDUFA10,NDUFB3,NDUFS3,NDUFS8,OPA1,OXA1L,SLC9A1,SSBP1,UQCRFS1,DNAJA3,AIFM1,LONP1,PMPCB,TOMM70,DNM1L,PPIF,TOMM40,TIMM44,MTX2,YME1L1,IMMT,PHB2,PMPCA,CLUH,HIGD1A,POLDIP2,HTRA2,ACAD9,NDUFAF4,TACO1,CHCHD3,ATAD3A,FOXRED1,DNAJC11,VPS35,AGK,RCC1L,SLIRP,ATAD3B,TIMM50,ATP5IF1,THEM4,NDUFA11,TIMM23,SLC25A10,SLC25A13,A…
9_Member	GO Biological Processes	GO:0007005	mitochondrion organization	-21.7059	-19.1626	59/445	142,207,292,293,598,617,1020,1267,3028,3313,3329,4124,4540,4580,4702,4705,4709,4722,4728,4976,5018,6548,6742,7386,9093,9131,9361,9512,9868,10059,10105,10452,10469,10651,10730,10989,11331,23203,23277,25994,26073,27429,28976,29078,51204,54927,55210,55572,55735,55737,55750,81554,81892,83858,92609,93974,117145,126328,100287932	PARP1,AKT1,SLC25A5,SLC25A6,BCL2L1,BCS1L,CDK5,CNP,HSD17B10,HSPA9,HSPD1,MAN2A1,ND5,MTX1,NDUFA8,NDUFA10,NDUFB3,NDUFS3,NDUFS8,OPA1,OXA1L,SLC9A1,SSBP1,UQCRFS1,DNAJA3,AIFM1,LONP1,PMPCB,TOMM70,DNM1L,PPIF,TOMM40,TIMM44,MTX2,YME1L1,IMMT,PHB2,PMPCA,CLUH,HIGD1A,POLDIP2,HTRA2,ACAD9,NDUFAF4,TACO1,CHCHD3,ATAD3A,FOXRED1,DNAJC11,VPS35,AGK,RCC1L,SLIRP,ATAD3B,TIMM50,ATP5IF1,THEM4,NDUFA11,TIMM23
9_Member	GO Biological Processes	GO:0006839	mitochondrial transport	-12.6227	-10.4193	26/150	292,293,598,617,1267,1468,3329,4580,5018,6548,9131,9512,9868,10105,10165,10452,10469,10651,23203,23456,55737,55750,92609,93974,117145,100287932	SLC25A5,SLC25A6,BCL2L1,BCS1L,CNP,SLC25A10,HSPD1,MTX1,OXA1L,SLC9A1,AIFM1,PMPCB,TOMM70,PPIF,SLC25A13,TOMM40,TIMM44,MTX2,PMPCA,ABCB10,VPS35,AGK,TIMM50,ATP5IF1,THEM4,TIMM23
9_Member	GO Biological Processes	GO:0007006	mitochondrial membrane organization	-10.6228	-8.52377	21/117	292,293,598,617,1267,3313,4580,4976,5018,6548,9868,10105,10452,10651,10989,54927,55735,55750,92609,93974,117145	SLC25A5,SLC25A6,BCL2L1,BCS1L,CNP,HSPA9,MTX1,OPA1,OXA1L,SLC9A1,TOMM70,PPIF,TOMM40,MTX2,IMMT,CHCHD3,DNAJC11,AGK,TIMM50,ATP5IF1,THEM4
9_Member	GO Biological Processes	GO:0090559	regulation of membrane permeability	-3.40813	-2.07192	9/77	292,293,598,1267,6548,9414,10105,93974,117145	SLC25A5,SLC25A6,BCL2L1,CNP,SLC9A1,TJP2,PPIF,ATP5IF1,THEM4
9_Member	GO Biological Processes	GO:0046902	regulation of mitochondrial membrane permeability	-3.38131	-2.0522	8/62	292,293,598,1267,6548,10105,93974,117145	SLC25A5,SLC25A6,BCL2L1,CNP,SLC9A1,PPIF,ATP5IF1,THEM4
10_Summary	GO Biological Processes	GO:0034660	ncRNA metabolic process	-21.3176	-18.7877	63/514	16,1022,1653,1654,1655,2058,2193,2926,3028,3376,3735,4141,4677,4686,5188,5591,6125,6129,6135,6154,6201,6202,6208,6209,6217,6218,6232,6428,6741,6897,7407,8570,9045,9328,9329,9692,10360,10521,10799,22803,22894,23517,27044,50628,51067,51106,51493,51520,51605,54888,54931,54938,55157,55596,55699,55781,57038,60528,79727,80335,81627,131405,389421,6128,6134,6147,6203,7514,7520,8451,10514,22868,22907,2319…	AARS1,CDK7,DDX1,DDX3X,DDX5,EPRS1,FARSA,GRSF1,HSD17B10,IARS1,KARS1,MARS1,NARS1,NCBP1,GATB,PRKDC,RPL5,RPL7,RPL11,RPL26,RPS7,RPS8,RPS14,RPS15,RPS16,RPS17,RPS27,SRSF3,SSB,TARS1,VARS1,KHSRP,RPL14,GTF3C5,GTF3C4,PRORP,NPM3,DDX17,RPP40,XRN2,DIS3,MTREX,SND1,GEMIN4,YARS2,TFB1M,RTCB,LARS1,TRMT6,NSUN2,TRMT10C,SARS2,DARS2,ZCCHC8,IARS2,RIOK2,RARS2,ELAC2,LIN28A,WDR82,TRMT1L,TRIM71,LIN28B,RPL6,RPL10,RPL23A,RPS9,…
10_Member	GO Biological Processes	GO:0034660	ncRNA metabolic process	-21.3176	-18.7877	63/514	16,1022,1653,1654,1655,2058,2193,2926,3028,3376,3735,4141,4677,4686,5188,5591,6125,6129,6135,6154,6201,6202,6208,6209,6217,6218,6232,6428,6741,6897,7407,8570,9045,9328,9329,9692,10360,10521,10799,22803,22894,23517,27044,50628,51067,51106,51493,51520,51605,54888,54931,54938,55157,55596,55699,55781,57038,60528,79727,80335,81627,131405,389421	AARS1,CDK7,DDX1,DDX3X,DDX5,EPRS1,FARSA,GRSF1,HSD17B10,IARS1,KARS1,MARS1,NARS1,NCBP1,GATB,PRKDC,RPL5,RPL7,RPL11,RPL26,RPS7,RPS8,RPS14,RPS15,RPS16,RPS17,RPS27,SRSF3,SSB,TARS1,VARS1,KHSRP,RPL14,GTF3C5,GTF3C4,PRORP,NPM3,DDX17,RPP40,XRN2,DIS3,MTREX,SND1,GEMIN4,YARS2,TFB1M,RTCB,LARS1,TRMT6,NSUN2,TRMT10C,SARS2,DARS2,ZCCHC8,IARS2,RIOK2,RARS2,ELAC2,LIN28A,WDR82,TRMT1L,TRIM71,LIN28B
10_Member	GO Biological Processes	GO:0042254	ribosome biogenesis	-13.9529	-11.6753	38/291	1654,5591,6125,6128,6129,6134,6135,6147,6154,6201,6202,6203,6208,6209,6217,6218,6232,7514,7520,8451,9045,10360,10514,10521,10799,22803,22868,22894,22907,23195,23517,29093,50628,51106,51116,55341,55781,90441	DDX3X,PRKDC,RPL5,RPL6,RPL7,RPL10,RPL11,RPL23A,RPL26,RPS7,RPS8,RPS9,RPS14,RPS15,RPS16,RPS17,RPS27,XPO1,XRCC5,CUL4A,RPL14,NPM3,MYBBP1A,DDX17,RPP40,XRN2,FASTKD2,DIS3,DHX30,MDN1,MTREX,MRPL22,GEMIN4,TFB1M,MRPS2,LSG1,RIOK2,ZNF622
10_Member	GO Biological Processes	GO:0034470	ncRNA processing	-12.7279	-10.5183	44/416	16,1653,1654,1655,2926,3028,3735,4686,5591,6125,6129,6135,6154,6201,6202,6208,6209,6217,6218,6232,6428,6741,9045,9692,10360,10521,10799,22803,22894,23517,50628,51106,51493,51605,54888,54931,54938,55596,55781,60528,79727,81627,131405,389421	AARS1,DDX1,DDX3X,DDX5,GRSF1,HSD17B10,KARS1,NCBP1,PRKDC,RPL5,RPL7,RPL11,RPL26,RPS7,RPS8,RPS14,RPS15,RPS16,RPS17,RPS27,SRSF3,SSB,RPL14,PRORP,NPM3,DDX17,RPP40,XRN2,DIS3,MTREX,GEMIN4,TFB1M,RTCB,TRMT6,NSUN2,TRMT10C,SARS2,ZCCHC8,RIOK2,ELAC2,LIN28A,TRMT1L,TRIM71,LIN28B
10_Member	GO Biological Processes	GO:0016072	rRNA metabolic process	-7.30797	-5.48484	25/242	4141,5591,6125,6129,6135,6154,6201,6202,6208,6209,6217,6218,6232,9045,9328,9329,10360,10521,10799,22803,22894,23517,50628,51106,55781	MARS1,PRKDC,RPL5,RPL7,RPL11,RPL26,RPS7,RPS8,RPS14,RPS15,RPS16,RPS17,RPS27,RPL14,GTF3C5,GTF3C4,NPM3,DDX17,RPP40,XRN2,DIS3,MTREX,GEMIN4,TFB1M,RIOK2
10_Member	GO Biological Processes	GO:0006364	rRNA processing	-6.5796	-4.82452	22/211	5591,6125,6129,6135,6154,6201,6202,6208,6209,6217,6218,6232,9045,10360,10521,10799,22803,22894,23517,50628,51106,55781	PRKDC,RPL5,RPL7,RPL11,RPL26,RPS7,RPS8,RPS14,RPS15,RPS16,RPS17,RPS27,RPL14,NPM3,DDX17,RPP40,XRN2,DIS3,MTREX,GEMIN4,TFB1M,RIOK2
10_Member	GO Biological Processes	GO:0042274	ribosomal small subunit biogenesis	-5.60022	-3.9436	12/78	5591,6201,6202,6203,6208,6209,6217,6218,6232,7520,10799,55781	PRKDC,RPS7,RPS8,RPS9,RPS14,RPS15,RPS16,RPS17,RPS27,XRCC5,RPP40,RIOK2
10_Member	GO Biological Processes	GO:0000028	ribosomal small subunit assembly	-3.77058	-2.38103	5/19	5591,6208,6209,6232,7520	PRKDC,RPS14,RPS15,RPS27,XRCC5
11_Summary	GO Biological Processes	GO:0006091	generation of precursor metabolites and energy	-20.5041	-18.0119	55/410	34,178,207,498,506,509,1327,1431,1738,2230,2235,2271,2629,2673,2820,2936,3419,3420,4200,4436,4508,4513,4540,4702,4705,4709,4722,4723,4726,4728,4967,5018,5160,5162,5211,5214,5499,5500,5501,5836,7086,7384,7385,7386,8659,8802,8803,10165,10514,10728,23729,26227,55526,93974,126328,6256,10128,10131,28976,29078,51204,51300,79944,598,2521,3831,4686,5530,5534,5606,5693,5707,5709,5710,6311,6428,7186,7277,9…	ACADM,AGL,AKT1,ATP5F1A,ATP5F1B,ATP5F1C,COX4I1,CS,DLD,FDX1,FECH,FH,GBA1,GFPT1,GPD2,GSR,IDH3A,IDH3B,ME2,MSH2,ATP6,COX2,ND5,NDUFA8,NDUFA10,NDUFB3,NDUFS3,NDUFV1,NDUFS6,NDUFS8,OGDH,OXA1L,PDHA1,PDHB,PFKL,PFKP,PPP1CA,PPP1CB,PPP1CC,PYGL,TKT,UQCRC1,UQCRC2,UQCRFS1,ALDH4A1,SUCLG1,SUCLA2,SLC25A13,MYBBP1A,PTGES3,SHPK,PHGDH,DHTKD1,ATP5IF1,NDUFA11,RXRA,LRPPRC,TRAP1,ACAD9,NDUFAF4,TACO1,TIMMDC1,L2HGDH,BCL2L1,FUS,…
11_Member	GO Biological Processes	GO:0006091	generation of precursor metabolites and energy	-20.5041	-18.0119	55/410	34,178,207,498,506,509,1327,1431,1738,2230,2235,2271,2629,2673,2820,2936,3419,3420,4200,4436,4508,4513,4540,4702,4705,4709,4722,4723,4726,4728,4967,5018,5160,5162,5211,5214,5499,5500,5501,5836,7086,7384,7385,7386,8659,8802,8803,10165,10514,10728,23729,26227,55526,93974,126328	ACADM,AGL,AKT1,ATP5F1A,ATP5F1B,ATP5F1C,COX4I1,CS,DLD,FDX1,FECH,FH,GBA1,GFPT1,GPD2,GSR,IDH3A,IDH3B,ME2,MSH2,ATP6,COX2,ND5,NDUFA8,NDUFA10,NDUFB3,NDUFS3,NDUFV1,NDUFS6,NDUFS8,OGDH,OXA1L,PDHA1,PDHB,PFKL,PFKP,PPP1CA,PPP1CB,PPP1CC,PYGL,TKT,UQCRC1,UQCRC2,UQCRFS1,ALDH4A1,SUCLG1,SUCLA2,SLC25A13,MYBBP1A,PTGES3,SHPK,PHGDH,DHTKD1,ATP5IF1,NDUFA11
11_Member	Reactome Gene Sets	R-HSA-1428517	The citric acid (TCA) cycle and respiratory electron transport	-20.4926	-18.0064	37/178	498,506,509,1327,1431,1738,2271,3419,3420,4200,4508,4513,4540,4702,4705,4709,4722,4723,4726,4728,4967,5160,5162,6256,7384,7385,7386,8802,8803,10128,10131,28976,29078,51204,51300,79944,126328	ATP5F1A,ATP5F1B,ATP5F1C,COX4I1,CS,DLD,FH,IDH3A,IDH3B,ME2,ATP6,COX2,ND5,NDUFA8,NDUFA10,NDUFB3,NDUFS3,NDUFV1,NDUFS6,NDUFS8,OGDH,PDHA1,PDHB,RXRA,UQCRC1,UQCRC2,UQCRFS1,SUCLG1,SUCLA2,LRPPRC,TRAP1,ACAD9,NDUFAF4,TACO1,TIMMDC1,L2HGDH,NDUFA11
11_Member	GO Biological Processes	GO:0015980	energy derivation by oxidation of organic compounds	-20.226	-17.7516	44/264	34,178,207,498,506,509,1327,1431,1738,2271,2629,2673,2820,3419,3420,4436,4508,4513,4540,4702,4705,4709,4722,4723,4726,4728,4967,5018,5160,5162,5499,5500,5501,5836,7384,7385,7386,8802,8803,10165,10514,10728,55526,126328	ACADM,AGL,AKT1,ATP5F1A,ATP5F1B,ATP5F1C,COX4I1,CS,DLD,FH,GBA1,GFPT1,GPD2,IDH3A,IDH3B,MSH2,ATP6,COX2,ND5,NDUFA8,NDUFA10,NDUFB3,NDUFS3,NDUFV1,NDUFS6,NDUFS8,OGDH,OXA1L,PDHA1,PDHB,PPP1CA,PPP1CB,PPP1CC,PYGL,UQCRC1,UQCRC2,UQCRFS1,SUCLG1,SUCLA2,SLC25A13,MYBBP1A,PTGES3,DHTKD1,NDUFA11
11_Member	GO Biological Processes	GO:0045333	cellular respiration	-17.3385	-14.9758	35/194	498,506,509,1327,1431,1738,2271,2629,2820,3419,3420,4436,4508,4513,4540,4702,4705,4709,4722,4723,4726,4728,4967,5018,5160,5162,7384,7385,7386,8802,8803,10165,10514,55526,126328	ATP5F1A,ATP5F1B,ATP5F1C,COX4I1,CS,DLD,FH,GBA1,GPD2,IDH3A,IDH3B,MSH2,ATP6,COX2,ND5,NDUFA8,NDUFA10,NDUFB3,NDUFS3,NDUFV1,NDUFS6,NDUFS8,OGDH,OXA1L,PDHA1,PDHB,UQCRC1,UQCRC2,UQCRFS1,SUCLG1,SUCLA2,SLC25A13,MYBBP1A,DHTKD1,NDUFA11
11_Member	GO Biological Processes	GO:0009060	aerobic respiration	-16.1868	-13.8373	31/162	498,506,509,1327,1431,1738,2271,3419,3420,4436,4508,4513,4540,4702,4705,4709,4722,4723,4726,4728,4967,5018,5160,5162,7384,7385,7386,8802,8803,55526,126328	ATP5F1A,ATP5F1B,ATP5F1C,COX4I1,CS,DLD,FH,IDH3A,IDH3B,MSH2,ATP6,COX2,ND5,NDUFA8,NDUFA10,NDUFB3,NDUFS3,NDUFV1,NDUFS6,NDUFS8,OGDH,OXA1L,PDHA1,PDHB,UQCRC1,UQCRC2,UQCRFS1,SUCLG1,SUCLA2,DHTKD1,NDUFA11
11_Member	KEGG Pathway	hsa05014	Amyotrophic lateral sclerosis	-15.5026	-13.1784	45/364	498,506,509,598,1327,2521,3831,4508,4513,4540,4686,4702,4705,4709,4722,4723,4726,4728,5530,5534,5606,5693,5707,5709,5710,6311,6428,7186,7277,7384,7385,7386,9818,9972,10121,10452,10671,10762,11047,11273,29978,30849,55860,126328,493869	ATP5F1A,ATP5F1B,ATP5F1C,BCL2L1,COX4I1,FUS,KLC1,ATP6,COX2,ND5,NCBP1,NDUFA8,NDUFA10,NDUFB3,NDUFS3,NDUFV1,NDUFS6,NDUFS8,PPP3CA,PPP3R1,MAP2K3,PSMB5,PSMD1,PSMD3,PSMD4,ATXN2,SRSF3,TRAF2,TUBA4A,UQCRC1,UQCRC2,UQCRFS1,NUP58,NUP153,ACTR1A,TOMM40,DCTN6,NUP50,ADRM1,ATXN2L,UBQLN2,PIK3R4,ACTR10,NDUFA11,GPX8
11_Member	KEGG Pathway	hsa05016	Huntington disease	-15.4013	-13.0852	41/306	160,161,163,292,293,498,506,509,841,1173,1327,3831,4508,4513,4540,4702,4705,4709,4722,4723,4726,4728,5430,5693,5707,5709,5710,6507,7186,7277,7384,7385,7386,10105,10121,10671,11047,30849,55860,126328,493869	AP2A1,AP2A2,AP2B1,SLC25A5,SLC25A6,ATP5F1A,ATP5F1B,ATP5F1C,CASP8,AP2M1,COX4I1,KLC1,ATP6,COX2,ND5,NDUFA8,NDUFA10,NDUFB3,NDUFS3,NDUFV1,NDUFS6,NDUFS8,POLR2A,PSMB5,PSMD1,PSMD3,PSMD4,SLC1A3,TRAF2,TUBA4A,UQCRC1,UQCRC2,UQCRFS1,PPIF,ACTR1A,DCTN6,ADRM1,PIK3R4,ACTR10,NDUFA11,GPX8
11_Member	KEGG Pathway	hsa05022	Pathways of neurodegeneration - multiple diseases	-14.8919	-12.5877	51/476	292,293,488,498,506,509,598,841,1020,1327,1459,1499,2521,3028,3831,4508,4513,4540,4702,4705,4709,4722,4723,4726,4728,4790,5530,5534,5606,5693,5707,5709,5710,6311,7186,7277,7384,7385,7386,10105,10121,10131,10452,10671,11047,11273,27429,30849,55860,126328,493869	SLC25A5,SLC25A6,ATP2A2,ATP5F1A,ATP5F1B,ATP5F1C,BCL2L1,CASP8,CDK5,COX4I1,CSNK2A2,CTNNB1,FUS,HSD17B10,KLC1,ATP6,COX2,ND5,NDUFA8,NDUFA10,NDUFB3,NDUFS3,NDUFV1,NDUFS6,NDUFS8,NFKB1,PPP3CA,PPP3R1,MAP2K3,PSMB5,PSMD1,PSMD3,PSMD4,ATXN2,TRAF2,TUBA4A,UQCRC1,UQCRC2,UQCRFS1,PPIF,ACTR1A,TRAP1,TOMM40,DCTN6,ADRM1,ATXN2L,HTRA2,PIK3R4,ACTR10,NDUFA11,GPX8
11_Member	KEGG Pathway	hsa05010	Alzheimer disease	-14.6295	-12.3331	45/384	207,292,293,488,498,506,509,841,1020,1327,1459,1499,3028,3416,3831,4508,4513,4540,4702,4705,4709,4722,4723,4726,4728,4790,4891,5530,5534,5610,5693,5707,5709,5710,7186,7277,7384,7385,7386,10105,11047,23385,30849,64116,126328	AKT1,SLC25A5,SLC25A6,ATP2A2,ATP5F1A,ATP5F1B,ATP5F1C,CASP8,CDK5,COX4I1,CSNK2A2,CTNNB1,HSD17B10,IDE,KLC1,ATP6,COX2,ND5,NDUFA8,NDUFA10,NDUFB3,NDUFS3,NDUFV1,NDUFS6,NDUFS8,NFKB1,SLC11A2,PPP3CA,PPP3R1,EIF2AK2,PSMB5,PSMD1,PSMD3,PSMD4,TRAF2,TUBA4A,UQCRC1,UQCRC2,UQCRFS1,PPIF,ADRM1,NCSTN,PIK3R4,SLC39A8,NDUFA11
11_Member	KEGG Pathway	hsa05415	Diabetic cardiomyopathy	-14.1654	-11.8728	32/203	142,207,292,293,488,498,506,509,1327,2673,2936,4508,4513,4540,4702,4705,4709,4722,4723,4726,4728,4790,5160,5162,5499,5500,5501,7384,7385,7386,10105,126328	PARP1,AKT1,SLC25A5,SLC25A6,ATP2A2,ATP5F1A,ATP5F1B,ATP5F1C,COX4I1,GFPT1,GSR,ATP6,COX2,ND5,NDUFA8,NDUFA10,NDUFB3,NDUFS3,NDUFV1,NDUFS6,NDUFS8,NFKB1,PDHA1,PDHB,PPP1CA,PPP1CB,PPP1CC,UQCRC1,UQCRC2,UQCRFS1,PPIF,NDUFA11
11_Member	GO Biological Processes	GO:0019693	ribose phosphate metabolic process	-13.6992	-11.4361	45/407	31,142,215,498,506,509,526,790,1503,1738,2181,2182,4354,4508,4522,4540,4594,4702,4705,4709,4722,4723,4726,4728,4860,4967,4976,5160,5162,5211,5214,5836,6576,7086,8802,8803,8833,9414,10157,10165,10845,55526,79621,126328,201562	ACACA,PARP1,ABCD1,ATP5F1A,ATP5F1B,ATP5F1C,ATP6V1B2,CAD,CTPS1,DLD,ACSL3,ACSL4,MPP1,ATP6,MTHFD1,ND5,MMUT,NDUFA8,NDUFA10,NDUFB3,NDUFS3,NDUFV1,NDUFS6,NDUFS8,PNP,OGDH,OPA1,PDHA1,PDHB,PFKL,PFKP,PYGL,SLC25A1,TKT,SUCLG1,SUCLA2,GMPS,TJP2,AASS,SLC25A13,CLPX,DHTKD1,RNASEH2B,NDUFA11,HACD2
11_Member	GO Biological Processes	GO:0009259	ribonucleotide metabolic process	-12.7689	-10.5561	43/398	31,142,215,498,506,509,526,790,1503,1738,2181,2182,4354,4508,4522,4540,4594,4702,4705,4709,4722,4723,4726,4728,4860,4967,4976,5160,5162,5211,5214,6576,8802,8803,8833,9414,10157,10165,10845,55526,79621,126328,201562	ACACA,PARP1,ABCD1,ATP5F1A,ATP5F1B,ATP5F1C,ATP6V1B2,CAD,CTPS1,DLD,ACSL3,ACSL4,MPP1,ATP6,MTHFD1,ND5,MMUT,NDUFA8,NDUFA10,NDUFB3,NDUFS3,NDUFV1,NDUFS6,NDUFS8,PNP,OGDH,OPA1,PDHA1,PDHB,PFKL,PFKP,SLC25A1,SUCLG1,SUCLA2,GMPS,TJP2,AASS,SLC25A13,CLPX,DHTKD1,RNASEH2B,NDUFA11,HACD2
11_Member	Reactome Gene Sets	R-HSA-163200	Respiratory electron transport, ATP synthesis by chemiosmotic coupling, and heat production by uncoupling proteins.	-12.5558	-10.3586	24/127	498,506,509,1327,4508,4513,4540,4702,4705,4709,4722,4723,4726,4728,7384,7385,7386,10128,10131,28976,29078,51204,51300,126328	ATP5F1A,ATP5F1B,ATP5F1C,COX4I1,ATP6,COX2,ND5,NDUFA8,NDUFA10,NDUFB3,NDUFS3,NDUFV1,NDUFS6,NDUFS8,UQCRC1,UQCRC2,UQCRFS1,LRPPRC,TRAP1,ACAD9,NDUFAF4,TACO1,TIMMDC1,NDUFA11
11_Member	GO Biological Processes	GO:0009117	nucleotide metabolic process	-12.3566	-10.1715	49/515	31,142,215,498,506,509,526,790,1267,1503,1738,2181,2182,3420,3735,4354,4508,4522,4540,4594,4702,4705,4709,4722,4723,4726,4728,4860,4967,4976,5160,5162,5211,5214,6576,7086,8802,8803,8833,9414,10157,10165,10845,23729,25939,55526,79621,126328,201562	ACACA,PARP1,ABCD1,ATP5F1A,ATP5F1B,ATP5F1C,ATP6V1B2,CAD,CNP,CTPS1,DLD,ACSL3,ACSL4,IDH3B,KARS1,MPP1,ATP6,MTHFD1,ND5,MMUT,NDUFA8,NDUFA10,NDUFB3,NDUFS3,NDUFV1,NDUFS6,NDUFS8,PNP,OGDH,OPA1,PDHA1,PDHB,PFKL,PFKP,SLC25A1,TKT,SUCLG1,SUCLA2,GMPS,TJP2,AASS,SLC25A13,CLPX,SHPK,SAMHD1,DHTKD1,RNASEH2B,NDUFA11,HACD2
11_Member	GO Biological Processes	GO:0055086	nucleobase-containing small molecule metabolic process	-12.3278	-10.1486	53/590	31,142,215,498,506,509,526,790,1267,1503,1738,2135,2181,2182,2673,3420,3735,4354,4508,4522,4540,4594,4702,4705,4709,4722,4723,4726,4728,4860,4967,4976,5160,5162,5211,5214,6472,6576,7086,8802,8803,8833,9414,10157,10165,10845,23028,23729,25939,55526,79621,126328,201562	ACACA,PARP1,ABCD1,ATP5F1A,ATP5F1B,ATP5F1C,ATP6V1B2,CAD,CNP,CTPS1,DLD,EXTL2,ACSL3,ACSL4,GFPT1,IDH3B,KARS1,MPP1,ATP6,MTHFD1,ND5,MMUT,NDUFA8,NDUFA10,NDUFB3,NDUFS3,NDUFV1,NDUFS6,NDUFS8,PNP,OGDH,OPA1,PDHA1,PDHB,PFKL,PFKP,SHMT2,SLC25A1,TKT,SUCLG1,SUCLA2,GMPS,TJP2,AASS,SLC25A13,CLPX,KDM1A,SHPK,SAMHD1,DHTKD1,RNASEH2B,NDUFA11,HACD2
11_Member	GO Biological Processes	GO:0006753	nucleoside phosphate metabolic process	-12.108	-9.93176	49/523	31,142,215,498,506,509,526,790,1267,1503,1738,2181,2182,3420,3735,4354,4508,4522,4540,4594,4702,4705,4709,4722,4723,4726,4728,4860,4967,4976,5160,5162,5211,5214,6576,7086,8802,8803,8833,9414,10157,10165,10845,23729,25939,55526,79621,126328,201562	ACACA,PARP1,ABCD1,ATP5F1A,ATP5F1B,ATP5F1C,ATP6V1B2,CAD,CNP,CTPS1,DLD,ACSL3,ACSL4,IDH3B,KARS1,MPP1,ATP6,MTHFD1,ND5,MMUT,NDUFA8,NDUFA10,NDUFB3,NDUFS3,NDUFV1,NDUFS6,NDUFS8,PNP,OGDH,OPA1,PDHA1,PDHB,PFKL,PFKP,SLC25A1,TKT,SUCLG1,SUCLA2,GMPS,TJP2,AASS,SLC25A13,CLPX,SHPK,SAMHD1,DHTKD1,RNASEH2B,NDUFA11,HACD2
11_Member	GO Biological Processes	GO:0072521	purine-containing compound metabolic process	-12.0969	-9.92351	47/487	31,142,215,498,506,509,526,1738,2181,2182,3420,4354,4508,4522,4540,4594,4702,4705,4709,4722,4723,4726,4728,4860,4967,4976,5160,5162,5211,5214,6472,6576,7086,8802,8803,8833,9414,9429,10157,10165,10845,23028,23729,25939,55526,126328,201562	ACACA,PARP1,ABCD1,ATP5F1A,ATP5F1B,ATP5F1C,ATP6V1B2,DLD,ACSL3,ACSL4,IDH3B,MPP1,ATP6,MTHFD1,ND5,MMUT,NDUFA8,NDUFA10,NDUFB3,NDUFS3,NDUFV1,NDUFS6,NDUFS8,PNP,OGDH,OPA1,PDHA1,PDHB,PFKL,PFKP,SHMT2,SLC25A1,TKT,SUCLG1,SUCLA2,GMPS,TJP2,ABCG2,AASS,SLC25A13,CLPX,KDM1A,SHPK,SAMHD1,DHTKD1,NDUFA11,HACD2
11_Member	GO Biological Processes	GO:0009150	purine ribonucleotide metabolic process	-11.596	-9.43684	40/379	31,142,215,498,506,509,526,1738,2181,2182,4354,4508,4522,4540,4594,4702,4705,4709,4722,4723,4726,4728,4860,4967,4976,5160,5162,5211,5214,6576,8802,8803,8833,9414,10157,10165,10845,55526,126328,201562	ACACA,PARP1,ABCD1,ATP5F1A,ATP5F1B,ATP5F1C,ATP6V1B2,DLD,ACSL3,ACSL4,MPP1,ATP6,MTHFD1,ND5,MMUT,NDUFA8,NDUFA10,NDUFB3,NDUFS3,NDUFV1,NDUFS6,NDUFS8,PNP,OGDH,OPA1,PDHA1,PDHB,PFKL,PFKP,SLC25A1,SUCLG1,SUCLA2,GMPS,TJP2,AASS,SLC25A13,CLPX,DHTKD1,NDUFA11,HACD2
11_Member	KEGG Pathway	hsa05012	Parkinson disease	-11.5759	-9.41956	33/266	292,293,498,506,509,598,1327,3831,4508,4513,4540,4702,4705,4709,4722,4723,4726,4728,4891,5693,5707,5709,5710,7277,7384,7385,7386,10105,10131,11047,27429,64116,126328	SLC25A5,SLC25A6,ATP5F1A,ATP5F1B,ATP5F1C,BCL2L1,COX4I1,KLC1,ATP6,COX2,ND5,NDUFA8,NDUFA10,NDUFB3,NDUFS3,NDUFV1,NDUFS6,NDUFS8,SLC11A2,PSMB5,PSMD1,PSMD3,PSMD4,TUBA4A,UQCRC1,UQCRC2,UQCRFS1,PPIF,TRAP1,ADRM1,HTRA2,SLC39A8,NDUFA11
11_Member	GO Biological Processes	GO:0006163	purine nucleotide metabolic process	-11.3274	-9.17929	44/457	31,142,215,498,506,509,526,1738,2181,2182,3420,4354,4508,4522,4540,4594,4702,4705,4709,4722,4723,4726,4728,4860,4967,4976,5160,5162,5211,5214,6576,7086,8802,8803,8833,9414,10157,10165,10845,23729,25939,55526,126328,201562	ACACA,PARP1,ABCD1,ATP5F1A,ATP5F1B,ATP5F1C,ATP6V1B2,DLD,ACSL3,ACSL4,IDH3B,MPP1,ATP6,MTHFD1,ND5,MMUT,NDUFA8,NDUFA10,NDUFB3,NDUFS3,NDUFV1,NDUFS6,NDUFS8,PNP,OGDH,OPA1,PDHA1,PDHB,PFKL,PFKP,SLC25A1,TKT,SUCLG1,SUCLA2,GMPS,TJP2,AASS,SLC25A13,CLPX,SHPK,SAMHD1,DHTKD1,NDUFA11,HACD2
11_Member	GO Biological Processes	GO:0046390	ribose phosphate biosynthetic process	-11.256	-9.11334	29/213	31,498,506,509,790,1503,1738,2181,2182,4508,4522,4540,4594,4702,4705,4709,4722,4723,4726,4728,5160,5162,5836,6576,7086,8833,10165,126328,201562	ACACA,ATP5F1A,ATP5F1B,ATP5F1C,CAD,CTPS1,DLD,ACSL3,ACSL4,ATP6,MTHFD1,ND5,MMUT,NDUFA8,NDUFA10,NDUFB3,NDUFS3,NDUFV1,NDUFS6,NDUFS8,PDHA1,PDHB,PYGL,SLC25A1,TKT,GMPS,SLC25A13,NDUFA11,HACD2
11_Member	Reactome Gene Sets	R-HSA-611105	Respiratory electron transport	-10.8009	-8.69196	20/103	1327,4513,4540,4702,4705,4709,4722,4723,4726,4728,7384,7385,7386,10128,10131,28976,29078,51204,51300,126328	COX4I1,COX2,ND5,NDUFA8,NDUFA10,NDUFB3,NDUFS3,NDUFV1,NDUFS6,NDUFS8,UQCRC1,UQCRC2,UQCRFS1,LRPPRC,TRAP1,ACAD9,NDUFAF4,TACO1,TIMMDC1,NDUFA11
11_Member	WikiPathways	WP111	Electron transport chain: OXPHOS system in mitochondria	-10.8009	-8.69196	20/103	292,293,498,506,509,1327,4508,4513,4540,4702,4705,4709,4722,4723,4726,4728,7384,7385,7386,93974	SLC25A5,SLC25A6,ATP5F1A,ATP5F1B,ATP5F1C,COX4I1,ATP6,COX2,ND5,NDUFA8,NDUFA10,NDUFB3,NDUFS3,NDUFV1,NDUFS6,NDUFS8,UQCRC1,UQCRC2,UQCRFS1,ATP5IF1
11_Member	GO Biological Processes	GO:0090407	organophosphate biosynthetic process	-10.6602	-8.55874	47/535	31,498,506,509,790,1159,1503,1738,2181,2182,3636,3735,4508,4522,4540,4594,4702,4705,4709,4722,4723,4726,4728,4860,5160,5162,5286,5288,5297,5836,6576,7086,8833,9054,10165,10243,10554,10558,22845,22908,30849,51477,55151,79888,126328,201562,548596	ACACA,ATP5F1A,ATP5F1B,ATP5F1C,CAD,CKMT1B,CTPS1,DLD,ACSL3,ACSL4,INPPL1,KARS1,ATP6,MTHFD1,ND5,MMUT,NDUFA8,NDUFA10,NDUFB3,NDUFS3,NDUFV1,NDUFS6,NDUFS8,PNP,PDHA1,PDHB,PIK3C2A,PIK3C2G,PI4KA,PYGL,SLC25A1,TKT,GMPS,NFS1,SLC25A13,GPHN,AGPAT1,SPTLC1,DOLK,SACM1L,PIK3R4,ISYNA1,TMEM38B,LPCAT1,NDUFA11,HACD2,CKMT1A
11_Member	KEGG Pathway	hsa05020	Prion disease	-10.5864	-8.48982	32/273	292,293,498,506,509,1327,1459,3831,4508,4513,4540,4702,4705,4709,4722,4723,4726,4728,5530,5534,5693,5707,5709,5710,7277,7384,7385,7386,10105,10963,11047,126328	SLC25A5,SLC25A6,ATP5F1A,ATP5F1B,ATP5F1C,COX4I1,CSNK2A2,KLC1,ATP6,COX2,ND5,NDUFA8,NDUFA10,NDUFB3,NDUFS3,NDUFV1,NDUFS6,NDUFS8,PPP3CA,PPP3R1,PSMB5,PSMD1,PSMD3,PSMD4,TUBA4A,UQCRC1,UQCRC2,UQCRFS1,PPIF,STIP1,ADRM1,NDUFA11
11_Member	KEGG Pathway	hsa00190	Oxidative phosphorylation	-10.3024	-8.22248	22/134	498,506,509,526,537,1327,4508,4513,4540,4702,4705,4709,4722,4723,4726,4728,7384,7385,7386,10312,126328,245973	ATP5F1A,ATP5F1B,ATP5F1C,ATP6V1B2,ATP6AP1,COX4I1,ATP6,COX2,ND5,NDUFA8,NDUFA10,NDUFB3,NDUFS3,NDUFV1,NDUFS6,NDUFS8,UQCRC1,UQCRC2,UQCRFS1,TCIRG1,NDUFA11,ATP6V1C2
11_Member	GO Biological Processes	GO:0009260	ribonucleotide biosynthetic process	-10.1399	-8.07374	27/206	31,498,506,509,790,1503,1738,2181,2182,4508,4522,4540,4594,4702,4705,4709,4722,4723,4726,4728,5160,5162,6576,8833,10165,126328,201562	ACACA,ATP5F1A,ATP5F1B,ATP5F1C,CAD,CTPS1,DLD,ACSL3,ACSL4,ATP6,MTHFD1,ND5,MMUT,NDUFA8,NDUFA10,NDUFB3,NDUFS3,NDUFV1,NDUFS6,NDUFS8,PDHA1,PDHB,SLC25A1,GMPS,SLC25A13,NDUFA11,HACD2
11_Member	GO Biological Processes	GO:0022900	electron transport chain	-9.76106	-7.70162	24/170	1327,1738,2230,2629,2820,2936,3420,4200,4513,4540,4702,4705,4709,4722,4723,4726,4728,7384,7385,7386,8659,10165,10514,26227	COX4I1,DLD,FDX1,GBA1,GPD2,GSR,IDH3B,ME2,COX2,ND5,NDUFA8,NDUFA10,NDUFB3,NDUFS3,NDUFV1,NDUFS6,NDUFS8,UQCRC1,UQCRC2,UQCRFS1,ALDH4A1,SLC25A13,MYBBP1A,PHGDH
11_Member	GO Biological Processes	GO:0006119	oxidative phosphorylation	-9.48035	-7.43407	20/121	498,506,509,1327,1738,4436,4508,4513,4540,4702,4705,4709,4722,4723,4726,4728,7384,7385,7386,126328	ATP5F1A,ATP5F1B,ATP5F1C,COX4I1,DLD,MSH2,ATP6,COX2,ND5,NDUFA8,NDUFA10,NDUFB3,NDUFS3,NDUFV1,NDUFS6,NDUFS8,UQCRC1,UQCRC2,UQCRFS1,NDUFA11
11_Member	GO Biological Processes	GO:0009152	purine ribonucleotide biosynthetic process	-9.37693	-7.34343	25/192	31,498,506,509,1738,2181,2182,4508,4522,4540,4594,4702,4705,4709,4722,4723,4726,4728,5160,5162,6576,8833,10165,126328,201562	ACACA,ATP5F1A,ATP5F1B,ATP5F1C,DLD,ACSL3,ACSL4,ATP6,MTHFD1,ND5,MMUT,NDUFA8,NDUFA10,NDUFB3,NDUFS3,NDUFV1,NDUFS6,NDUFS8,PDHA1,PDHB,SLC25A1,GMPS,SLC25A13,NDUFA11,HACD2
11_Member	KEGG Pathway	hsa05208	Chemical carcinogenesis - reactive oxygen species	-9.35157	-7.32016	27/223	207,292,293,498,506,509,1327,3162,4259,4508,4513,4540,4702,4705,4709,4722,4723,4726,4728,4790,5770,6714,7384,7385,7386,10105,126328	AKT1,SLC25A5,SLC25A6,ATP5F1A,ATP5F1B,ATP5F1C,COX4I1,HMOX1,MGST3,ATP6,COX2,ND5,NDUFA8,NDUFA10,NDUFB3,NDUFS3,NDUFV1,NDUFS6,NDUFS8,NFKB1,PTPN1,SRC,UQCRC1,UQCRC2,UQCRFS1,PPIF,NDUFA11
11_Member	GO Biological Processes	GO:0009165	nucleotide biosynthetic process	-9.14363	-7.12254	29/260	31,498,506,509,790,1503,1738,2181,2182,3735,4508,4522,4540,4594,4702,4705,4709,4722,4723,4726,4728,4860,5160,5162,6576,8833,10165,126328,201562	ACACA,ATP5F1A,ATP5F1B,ATP5F1C,CAD,CTPS1,DLD,ACSL3,ACSL4,KARS1,ATP6,MTHFD1,ND5,MMUT,NDUFA8,NDUFA10,NDUFB3,NDUFS3,NDUFV1,NDUFS6,NDUFS8,PNP,PDHA1,PDHB,SLC25A1,GMPS,SLC25A13,NDUFA11,HACD2
11_Member	GO Biological Processes	GO:1901293	nucleoside phosphate biosynthetic process	-9.06543	-7.05641	29/262	31,498,506,509,790,1503,1738,2181,2182,3735,4508,4522,4540,4594,4702,4705,4709,4722,4723,4726,4728,4860,5160,5162,6576,8833,10165,126328,201562	ACACA,ATP5F1A,ATP5F1B,ATP5F1C,CAD,CTPS1,DLD,ACSL3,ACSL4,KARS1,ATP6,MTHFD1,ND5,MMUT,NDUFA8,NDUFA10,NDUFB3,NDUFS3,NDUFV1,NDUFS6,NDUFS8,PNP,PDHA1,PDHB,SLC25A1,GMPS,SLC25A13,NDUFA11,HACD2
11_Member	GO Biological Processes	GO:0072522	purine-containing compound biosynthetic process	-8.80154	-6.81568	27/236	31,498,506,509,1738,2181,2182,4508,4522,4540,4594,4702,4705,4709,4722,4723,4726,4728,4860,5160,5162,6472,6576,8833,10165,126328,201562	ACACA,ATP5F1A,ATP5F1B,ATP5F1C,DLD,ACSL3,ACSL4,ATP6,MTHFD1,ND5,MMUT,NDUFA8,NDUFA10,NDUFB3,NDUFS3,NDUFV1,NDUFS6,NDUFS8,PNP,PDHA1,PDHB,SHMT2,SLC25A1,GMPS,SLC25A13,NDUFA11,HACD2
11_Member	GO Biological Processes	GO:0009199	ribonucleoside triphosphate metabolic process	-8.75863	-6.78207	24/190	142,498,506,509,526,790,1503,4508,4540,4702,4705,4709,4722,4723,4726,4728,4967,4976,5211,5214,10165,10845,55526,126328	PARP1,ATP5F1A,ATP5F1B,ATP5F1C,ATP6V1B2,CAD,CTPS1,ATP6,ND5,NDUFA8,NDUFA10,NDUFB3,NDUFS3,NDUFV1,NDUFS6,NDUFS8,OGDH,OPA1,PFKL,PFKP,SLC25A13,CLPX,DHTKD1,NDUFA11
11_Member	GO Biological Processes	GO:0009141	nucleoside triphosphate metabolic process	-8.64173	-6.68143	25/208	142,498,506,509,526,790,1503,4508,4540,4702,4705,4709,4722,4723,4726,4728,4967,4976,5211,5214,10165,10845,25939,55526,126328	PARP1,ATP5F1A,ATP5F1B,ATP5F1C,ATP6V1B2,CAD,CTPS1,ATP6,ND5,NDUFA8,NDUFA10,NDUFB3,NDUFS3,NDUFV1,NDUFS6,NDUFS8,OGDH,OPA1,PFKL,PFKP,SLC25A13,CLPX,SAMHD1,DHTKD1,NDUFA11
11_Member	KEGG Pathway	hsa04714	Thermogenesis	-8.30986	-6.38035	26/232	498,506,509,1327,2181,2182,4508,4513,4540,4702,4705,4709,4722,4723,4726,4728,5606,6595,6602,7384,7385,7386,23028,29078,65260,126328	ATP5F1A,ATP5F1B,ATP5F1C,COX4I1,ACSL3,ACSL4,ATP6,COX2,ND5,NDUFA8,NDUFA10,NDUFB3,NDUFS3,NDUFV1,NDUFS6,NDUFS8,MAP2K3,SMARCA2,SMARCD1,UQCRC1,UQCRC2,UQCRFS1,KDM1A,NDUFAF4,COA7,NDUFA11
11_Member	GO Biological Processes	GO:1901137	carbohydrate derivative biosynthetic process	-8.28355	-6.36221	45/590	31,498,506,509,790,1503,1738,2135,2181,2182,2673,2683,2801,4124,4508,4522,4540,4594,4702,4705,4709,4722,4723,4726,4728,4860,4864,5160,5162,5836,6576,7086,8833,9375,10165,10565,11227,11253,22845,55858,56052,64116,126328,201562,440138	ACACA,ATP5F1A,ATP5F1B,ATP5F1C,CAD,CTPS1,DLD,EXTL2,ACSL3,ACSL4,GFPT1,B4GALT1,GOLGA2,MAN2A1,ATP6,MTHFD1,ND5,MMUT,NDUFA8,NDUFA10,NDUFB3,NDUFS3,NDUFV1,NDUFS6,NDUFS8,PNP,NPC1,PDHA1,PDHB,PYGL,SLC25A1,TKT,GMPS,TM9SF2,SLC25A13,ARFGEF1,GALNT5,MAN1B1,DOLK,TMEM165,ALG1,SLC39A8,NDUFA11,HACD2,ALG11
11_Member	GO Biological Processes	GO:0009144	purine nucleoside triphosphate metabolic process	-8.15171	-6.24315	23/188	142,498,506,509,526,4508,4540,4702,4705,4709,4722,4723,4726,4728,4967,4976,5211,5214,10165,10845,25939,55526,126328	PARP1,ATP5F1A,ATP5F1B,ATP5F1C,ATP6V1B2,ATP6,ND5,NDUFA8,NDUFA10,NDUFB3,NDUFS3,NDUFV1,NDUFS6,NDUFS8,OGDH,OPA1,PFKL,PFKP,SLC25A13,CLPX,SAMHD1,DHTKD1,NDUFA11
11_Member	GO Biological Processes	GO:0046034	ATP metabolic process	-8.14441	-6.23742	21/158	142,498,506,509,526,4508,4540,4702,4705,4709,4722,4723,4726,4728,4967,5211,5214,10165,10845,55526,126328	PARP1,ATP5F1A,ATP5F1B,ATP5F1C,ATP6V1B2,ATP6,ND5,NDUFA8,NDUFA10,NDUFB3,NDUFS3,NDUFV1,NDUFS6,NDUFS8,OGDH,PFKL,PFKP,SLC25A13,CLPX,DHTKD1,NDUFA11
11_Member	GO Biological Processes	GO:0022904	respiratory electron transport chain	-8.08592	-6.18617	18/117	1327,1738,2629,2820,4513,4540,4702,4705,4709,4722,4723,4726,4728,7384,7385,7386,10165,10514	COX4I1,DLD,GBA1,GPD2,COX2,ND5,NDUFA8,NDUFA10,NDUFB3,NDUFS3,NDUFV1,NDUFS6,NDUFS8,UQCRC1,UQCRC2,UQCRFS1,SLC25A13,MYBBP1A
11_Member	GO Biological Processes	GO:0006164	purine nucleotide biosynthetic process	-7.86234	-5.98269	25/227	31,498,506,509,1738,2181,2182,4508,4522,4540,4594,4702,4705,4709,4722,4723,4726,4728,5160,5162,6576,8833,10165,126328,201562	ACACA,ATP5F1A,ATP5F1B,ATP5F1C,DLD,ACSL3,ACSL4,ATP6,MTHFD1,ND5,MMUT,NDUFA8,NDUFA10,NDUFB3,NDUFS3,NDUFV1,NDUFS6,NDUFS8,PDHA1,PDHB,SLC25A1,GMPS,SLC25A13,NDUFA11,HACD2
11_Member	GO Biological Processes	GO:0009205	purine ribonucleoside triphosphate metabolic process	-7.68613	-5.8181	22/183	142,498,506,509,526,4508,4540,4702,4705,4709,4722,4723,4726,4728,4967,4976,5211,5214,10165,10845,55526,126328	PARP1,ATP5F1A,ATP5F1B,ATP5F1C,ATP6V1B2,ATP6,ND5,NDUFA8,NDUFA10,NDUFB3,NDUFS3,NDUFV1,NDUFS6,NDUFS8,OGDH,OPA1,PFKL,PFKP,SLC25A13,CLPX,DHTKD1,NDUFA11
11_Member	GO Biological Processes	GO:0042776	proton motive force-driven mitochondrial ATP synthesis	-7.49214	-5.64646	13/64	498,506,509,4508,4540,4702,4705,4709,4722,4723,4726,4728,126328	ATP5F1A,ATP5F1B,ATP5F1C,ATP6,ND5,NDUFA8,NDUFA10,NDUFB3,NDUFS3,NDUFV1,NDUFS6,NDUFS8,NDUFA11
11_Member	GO Biological Processes	GO:0009201	ribonucleoside triphosphate biosynthetic process	-7.38187	-5.54615	16/102	498,506,509,790,1503,4508,4540,4702,4705,4709,4722,4723,4726,4728,10165,126328	ATP5F1A,ATP5F1B,ATP5F1C,CAD,CTPS1,ATP6,ND5,NDUFA8,NDUFA10,NDUFB3,NDUFS3,NDUFV1,NDUFS6,NDUFS8,SLC25A13,NDUFA11
11_Member	Reactome Gene Sets	R-HSA-6799198	Complex I biogenesis	-7.14582	-5.33469	12/57	4540,4702,4705,4709,4722,4723,4726,4728,28976,29078,51300,126328	ND5,NDUFA8,NDUFA10,NDUFB3,NDUFS3,NDUFV1,NDUFS6,NDUFS8,ACAD9,NDUFAF4,TIMMDC1,NDUFA11
11_Member	GO Biological Processes	GO:0010257	NADH dehydrogenase complex assembly	-6.96954	-5.17395	12/59	617,4540,4702,4705,4709,4722,4728,5018,28976,29078,55572,126328	BCS1L,ND5,NDUFA8,NDUFA10,NDUFB3,NDUFS3,NDUFS8,OXA1L,ACAD9,NDUFAF4,FOXRED1,NDUFA11
11_Member	GO Biological Processes	GO:0032981	mitochondrial respiratory chain complex I assembly	-6.96954	-5.17395	12/59	617,4540,4702,4705,4709,4722,4728,5018,28976,29078,55572,126328	BCS1L,ND5,NDUFA8,NDUFA10,NDUFB3,NDUFS3,NDUFS8,OXA1L,ACAD9,NDUFAF4,FOXRED1,NDUFA11
11_Member	WikiPathways	WP623	Oxidative phosphorylation	-6.8842	-5.09939	12/60	498,506,537,4508,4540,4702,4705,4722,4723,4726,4728,126328	ATP5F1A,ATP5F1B,ATP6AP1,ATP6,ND5,NDUFA8,NDUFA10,NDUFS3,NDUFV1,NDUFS6,NDUFS8,NDUFA11
11_Member	WikiPathways	WP4396	Nonalcoholic fatty liver disease	-6.8621	-5.08201	19/155	207,841,998,1327,4513,4702,4705,4709,4722,4723,4726,4728,4790,6256,7186,7384,7385,7386,126328	AKT1,CASP8,CDC42,COX4I1,COX2,NDUFA8,NDUFA10,NDUFB3,NDUFS3,NDUFV1,NDUFS6,NDUFS8,NFKB1,RXRA,TRAF2,UQCRC1,UQCRC2,UQCRFS1,NDUFA11
11_Member	KEGG Pathway	hsa04932	Non-alcoholic fatty liver disease	-6.8621	-5.08201	19/155	207,841,998,1327,4513,4702,4705,4709,4722,4723,4726,4728,4790,6256,7186,7384,7385,7386,126328	AKT1,CASP8,CDC42,COX4I1,COX2,NDUFA8,NDUFA10,NDUFB3,NDUFS3,NDUFV1,NDUFS6,NDUFS8,NFKB1,RXRA,TRAF2,UQCRC1,UQCRC2,UQCRFS1,NDUFA11
11_Member	GO Biological Processes	GO:0006754	ATP biosynthetic process	-6.81021	-5.03592	14/85	498,506,509,4508,4540,4702,4705,4709,4722,4723,4726,4728,10165,126328	ATP5F1A,ATP5F1B,ATP5F1C,ATP6,ND5,NDUFA8,NDUFA10,NDUFB3,NDUFS3,NDUFV1,NDUFS6,NDUFS8,SLC25A13,NDUFA11
11_Member	GO Biological Processes	GO:0015986	proton motive force-driven ATP synthesis	-6.77939	-5.00971	13/73	498,506,509,4508,4540,4702,4705,4709,4722,4723,4726,4728,126328	ATP5F1A,ATP5F1B,ATP5F1C,ATP6,ND5,NDUFA8,NDUFA10,NDUFB3,NDUFS3,NDUFV1,NDUFS6,NDUFS8,NDUFA11
11_Member	GO Biological Processes	GO:0033108	mitochondrial respiratory chain complex assembly	-6.75587	-4.98732	15/99	617,4540,4702,4705,4709,4722,4728,5018,7386,9131,28976,29078,51204,55572,126328	BCS1L,ND5,NDUFA8,NDUFA10,NDUFB3,NDUFS3,NDUFS8,OXA1L,UQCRFS1,AIFM1,ACAD9,NDUFAF4,TACO1,FOXRED1,NDUFA11
11_Member	GO Biological Processes	GO:0009142	nucleoside triphosphate biosynthetic process	-6.69029	-4.92741	16/114	498,506,509,790,1503,4508,4540,4702,4705,4709,4722,4723,4726,4728,10165,126328	ATP5F1A,ATP5F1B,ATP5F1C,CAD,CTPS1,ATP6,ND5,NDUFA8,NDUFA10,NDUFB3,NDUFS3,NDUFV1,NDUFS6,NDUFS8,SLC25A13,NDUFA11
11_Member	GO Biological Processes	GO:0019646	aerobic electron transport chain	-6.55391	-4.80541	14/89	1327,1738,4513,4540,4702,4705,4709,4722,4723,4726,4728,7384,7385,7386	COX4I1,DLD,COX2,ND5,NDUFA8,NDUFA10,NDUFB3,NDUFS3,NDUFV1,NDUFS6,NDUFS8,UQCRC1,UQCRC2,UQCRFS1
11_Member	WikiPathways	WP4324	Mitochondrial complex I assembly model OXPHOS system	-6.27701	-4.55183	11/56	4540,4702,4705,4709,4722,4723,4726,28976,29078,51300,55572	ND5,NDUFA8,NDUFA10,NDUFB3,NDUFS3,NDUFV1,NDUFS6,ACAD9,NDUFAF4,TIMMDC1,FOXRED1
11_Member	GO Biological Processes	GO:0042773	ATP synthesis coupled electron transport	-6.25361	-4.53151	14/94	1327,1738,4513,4540,4702,4705,4709,4722,4723,4726,4728,7384,7385,7386	COX4I1,DLD,COX2,ND5,NDUFA8,NDUFA10,NDUFB3,NDUFS3,NDUFV1,NDUFS6,NDUFS8,UQCRC1,UQCRC2,UQCRFS1
11_Member	GO Biological Processes	GO:0042775	mitochondrial ATP synthesis coupled electron transport	-6.25361	-4.53151	14/94	1327,1738,4513,4540,4702,4705,4709,4722,4723,4726,4728,7384,7385,7386	COX4I1,DLD,COX2,ND5,NDUFA8,NDUFA10,NDUFB3,NDUFS3,NDUFV1,NDUFS6,NDUFS8,UQCRC1,UQCRC2,UQCRFS1
11_Member	GO Biological Processes	GO:0009206	purine ribonucleoside triphosphate biosynthetic process	-6.13922	-4.42823	14/96	498,506,509,4508,4540,4702,4705,4709,4722,4723,4726,4728,10165,126328	ATP5F1A,ATP5F1B,ATP5F1C,ATP6,ND5,NDUFA8,NDUFA10,NDUFB3,NDUFS3,NDUFV1,NDUFS6,NDUFS8,SLC25A13,NDUFA11
11_Member	GO Biological Processes	GO:0009145	purine nucleoside triphosphate biosynthetic process	-6.08317	-4.37616	14/97	498,506,509,4508,4540,4702,4705,4709,4722,4723,4726,4728,10165,126328	ATP5F1A,ATP5F1B,ATP5F1C,ATP6,ND5,NDUFA8,NDUFA10,NDUFB3,NDUFS3,NDUFV1,NDUFS6,NDUFS8,SLC25A13,NDUFA11
11_Member	CORUM	CORUM:178	Respiratory chain complex I (holoenzyme), mitochondrial	-5.39451	-3.7742	9/44	4540,4702,4705,4709,4722,4723,4726,4728,126328	ND5,NDUFA8,NDUFA10,NDUFB3,NDUFS3,NDUFV1,NDUFS6,NDUFS8,NDUFA11
11_Member	GO Biological Processes	GO:0006120	mitochondrial electron transport, NADH to ubiquinone	-5.22561	-3.622	9/46	1738,4540,4702,4705,4709,4722,4723,4726,4728	DLD,ND5,NDUFA8,NDUFA10,NDUFB3,NDUFS3,NDUFV1,NDUFS6,NDUFS8
11_Member	KEGG Pathway	hsa04723	Retrograde endocannabinoid signaling	-2.87579	-1.64525	12/148	2782,4540,4702,4705,4709,4722,4723,4726,4728,57406,59345,126328	GNB1,ND5,NDUFA8,NDUFA10,NDUFB3,NDUFS3,NDUFV1,NDUFS6,NDUFS8,ABHD6,GNB4,NDUFA11
12_Summary	GO Biological Processes	GO:0006413	translational initiation	-18.4393	-16.0243	23/66	1654,1939,1964,1968,1973,1977,1981,1982,3646,4686,6188,6189,6218,8661,8662,8663,8664,8667,8890,8891,9669,27335,51386,5610,23277,26986,5094,6741,440275,3276,4124,11253	DDX3X,EIF2D,EIF1AX,EIF2S3,EIF4A1,EIF4E,EIF4G1,EIF4G2,EIF3E,NCBP1,RPS3,RPS3A,RPS17,EIF3A,EIF3B,EIF3C,EIF3D,EIF3H,EIF2B4,EIF2B3,EIF5B,EIF3K,EIF3L,EIF2AK2,CLUH,PABPC1,PCBP2,SSB,EIF2AK4,PRMT1,MAN2A1,MAN1B1
12_Member	GO Biological Processes	GO:0006413	translational initiation	-18.4393	-16.0243	23/66	1654,1939,1964,1968,1973,1977,1981,1982,3646,4686,6188,6189,6218,8661,8662,8663,8664,8667,8890,8891,9669,27335,51386	DDX3X,EIF2D,EIF1AX,EIF2S3,EIF4A1,EIF4E,EIF4G1,EIF4G2,EIF3E,NCBP1,RPS3,RPS3A,RPS17,EIF3A,EIF3B,EIF3C,EIF3D,EIF3H,EIF2B4,EIF2B3,EIF5B,EIF3K,EIF3L
12_Member	WikiPathways	WP107	Translation factors	-13.588	-11.3285	17/50	1964,1968,1973,1977,1981,3646,5610,8661,8662,8663,8664,8667,8890,8891,9669,23277,26986	EIF1AX,EIF2S3,EIF4A1,EIF4E,EIF4G1,EIF3E,EIF2AK2,EIF3A,EIF3B,EIF3C,EIF3D,EIF3H,EIF2B4,EIF2B3,EIF5B,CLUH,PABPC1
12_Member	GO Biological Processes	GO:0002183	cytoplasmic translational initiation	-13.0964	-10.8708	14/32	1939,1968,1973,1981,3646,4686,8661,8662,8663,8664,8667,8891,27335,51386	EIF2D,EIF2S3,EIF4A1,EIF4G1,EIF3E,NCBP1,EIF3A,EIF3B,EIF3C,EIF3D,EIF3H,EIF2B3,EIF3K,EIF3L
12_Member	CORUM	CORUM:742	eIF3 complex (EIF3S6, EIF3S5, EIF3S4, EIF3S3, EIF3S6IP, EIF3S2, EIF3S9, EIF3S12, EIF3S10, EIF3S8, EIF3S1, EIF3S7)	-9.65791	-7.60291	8/12	3646,8661,8662,8663,8664,8667,27335,51386	EIF3E,EIF3A,EIF3B,EIF3C,EIF3D,EIF3H,EIF3K,EIF3L
12_Member	CORUM	CORUM:1097	eIF3 complex (EIF3S6, EIF3S5, EIF3S4, EIF3S3, EIF3S6IP, EIF3S2, EIF3S9, EIF3S12, EIF3S10, EIF3S8, EIF3S1, EIF3S7, PCID1)	-9.25419	-7.22694	8/13	3646,8661,8662,8663,8664,8667,27335,51386	EIF3E,EIF3A,EIF3B,EIF3C,EIF3D,EIF3H,EIF3K,EIF3L
12_Member	GO Biological Processes	GO:0019081	viral translation	-8.57771	-6.61917	8/15	1939,5094,6741,8661,8662,8664,51386,440275	EIF2D,PCBP2,SSB,EIF3A,EIF3B,EIF3D,EIF3L,EIF2AK4
12_Member	GO Biological Processes	GO:0001732	formation of cytoplasmic translation initiation complex	-8.28792	-6.36496	8/16	3646,8661,8662,8663,8664,8667,27335,51386	EIF3E,EIF3A,EIF3B,EIF3C,EIF3D,EIF3H,EIF3K,EIF3L
12_Member	WikiPathways	WP5027	nsp1 from SARS-CoV-2 inhibits translation initiation in the host cell	-8.28792	-6.36496	8/16	1964,1968,3646,8661,8662,8663,8664,8667	EIF1AX,EIF2S3,EIF3E,EIF3A,EIF3B,EIF3C,EIF3D,EIF3H
12_Member	GO Biological Processes	GO:0075522	IRES-dependent viral translational initiation	-6.61742	-4.85901	6/11	1939,5094,6741,8661,8662,8664	EIF2D,PCBP2,SSB,EIF3A,EIF3B,EIF3D
12_Member	GO Biological Processes	GO:0019080	viral gene expression	-6.53335	-4.78594	11/53	1939,3276,4124,5094,6741,8661,8662,8664,11253,51386,440275	EIF2D,PRMT1,MAN2A1,PCBP2,SSB,EIF3A,EIF3B,EIF3D,MAN1B1,EIF3L,EIF2AK4
12_Member	GO Biological Processes	GO:0075525	viral translational termination-reinitiation	-5.46108	-3.82761	4/5	8661,8662,8664,51386	EIF3A,EIF3B,EIF3D,EIF3L
12_Member	CORUM	CORUM:4392	EIF3 complex (EIF3A, EIF3B, EIF3G, EIF3I, EIF3C)	-3.63075	-2.26541	3/5	8661,8662,8663	EIF3A,EIF3B,EIF3C
13_Summary	GO Biological Processes	GO:0006520	amino acid metabolic process	-18.3197	-15.9097	43/281	16,593,594,790,1491,1503,1738,2058,2184,2193,2673,2744,2806,3028,3376,3735,4141,4522,4594,4677,5188,5831,5832,6472,6507,6897,7407,7915,8659,8833,10157,10165,22928,26227,51067,51520,54938,55157,55699,57038,64116,80017,84842,31,215,1468,2194,2629,2879,4259,4860,5106,5825,6576,8402,8803,10558,10728,25902,51477,80142,84274,201562	AARS1,BCKDHA,BCKDHB,CAD,CTH,CTPS1,DLD,EPRS1,FAH,FARSA,GFPT1,GLS,GOT2,HSD17B10,IARS1,KARS1,MARS1,MTHFD1,MMUT,NARS1,GATB,PYCR1,ALDH18A1,SHMT2,SLC1A3,TARS1,VARS1,ALDH5A1,ALDH4A1,GMPS,AASS,SLC25A13,SEPHS2,PHGDH,YARS2,LARS1,SARS2,DARS2,IARS2,RARS2,SLC39A8,DGLUCY,HPDL,ACACA,ABCD1,SLC25A10,FASN,GBA1,GPX4,MGST3,PNP,PCK2,ABCD3,SLC25A1,SLC25A11,SUCLA2,SPTLC1,PTGES3,MTHFD1L,ISYNA1,PTGES2,COQ5,HACD2
13_Member	GO Biological Processes	GO:0006520	amino acid metabolic process	-18.3197	-15.9097	43/281	16,593,594,790,1491,1503,1738,2058,2184,2193,2673,2744,2806,3028,3376,3735,4141,4522,4594,4677,5188,5831,5832,6472,6507,6897,7407,7915,8659,8833,10157,10165,22928,26227,51067,51520,54938,55157,55699,57038,64116,80017,84842	AARS1,BCKDHA,BCKDHB,CAD,CTH,CTPS1,DLD,EPRS1,FAH,FARSA,GFPT1,GLS,GOT2,HSD17B10,IARS1,KARS1,MARS1,MTHFD1,MMUT,NARS1,GATB,PYCR1,ALDH18A1,SHMT2,SLC1A3,TARS1,VARS1,ALDH5A1,ALDH4A1,GMPS,AASS,SLC25A13,SEPHS2,PHGDH,YARS2,LARS1,SARS2,DARS2,IARS2,RARS2,SLC39A8,DGLUCY,HPDL
13_Member	GO Biological Processes	GO:0009064	glutamine family amino acid metabolic process	-7.76277	-5.89187	14/72	790,1503,2184,2673,2744,2806,5831,5832,7915,8659,8833,26227,64116,80017	CAD,CTPS1,FAH,GFPT1,GLS,GOT2,PYCR1,ALDH18A1,ALDH5A1,ALDH4A1,GMPS,PHGDH,SLC39A8,DGLUCY
13_Member	GO Biological Processes	GO:1901605	alpha-amino acid metabolic process	-7.06655	-5.26238	22/198	790,1491,1503,2184,2673,2744,2806,3028,4522,4594,5831,5832,6472,7915,8659,8833,10157,10165,22928,26227,64116,80017	CAD,CTH,CTPS1,FAH,GFPT1,GLS,GOT2,HSD17B10,MTHFD1,MMUT,PYCR1,ALDH18A1,SHMT2,ALDH5A1,ALDH4A1,GMPS,AASS,SLC25A13,SEPHS2,PHGDH,SLC39A8,DGLUCY
13_Member	GO Biological Processes	GO:0044283	small molecule biosynthetic process	-6.47441	-4.73425	34/443	31,215,790,1468,1491,2194,2629,2744,2806,2879,3028,4259,4522,4860,5106,5825,5831,5832,6472,6507,6576,8402,8803,10157,10165,10558,10728,22928,25902,26227,51477,80142,84274,201562	ACACA,ABCD1,CAD,SLC25A10,CTH,FASN,GBA1,GLS,GOT2,GPX4,HSD17B10,MGST3,MTHFD1,PNP,PCK2,ABCD3,PYCR1,ALDH18A1,SHMT2,SLC1A3,SLC25A1,SLC25A11,SUCLA2,AASS,SLC25A13,SPTLC1,PTGES3,SEPHS2,MTHFD1L,PHGDH,ISYNA1,PTGES2,COQ5,HACD2
13_Member	GO Biological Processes	GO:0046394	carboxylic acid biosynthetic process	-5.96139	-4.26898	24/266	31,215,790,1491,2194,2744,2806,2879,3028,4259,4522,5825,5831,5832,6472,6507,8803,10157,10728,22928,25902,26227,80142,201562	ACACA,ABCD1,CAD,CTH,FASN,GLS,GOT2,GPX4,HSD17B10,MGST3,MTHFD1,ABCD3,PYCR1,ALDH18A1,SHMT2,SLC1A3,SUCLA2,AASS,PTGES3,SEPHS2,MTHFD1L,PHGDH,PTGES2,HACD2
13_Member	GO Biological Processes	GO:0016053	organic acid biosynthetic process	-5.84622	-4.16233	24/270	31,215,790,1491,2194,2744,2806,2879,3028,4259,4522,5825,5831,5832,6472,6507,8803,10157,10728,22928,25902,26227,80142,201562	ACACA,ABCD1,CAD,CTH,FASN,GLS,GOT2,GPX4,HSD17B10,MGST3,MTHFD1,ABCD3,PYCR1,ALDH18A1,SHMT2,SLC1A3,SUCLA2,AASS,PTGES3,SEPHS2,MTHFD1L,PHGDH,PTGES2,HACD2
13_Member	GO Biological Processes	GO:0008652	amino acid biosynthetic process	-5.78638	-4.10901	12/75	790,1491,2744,2806,4522,5831,5832,6472,6507,10157,22928,26227	CAD,CTH,GLS,GOT2,MTHFD1,PYCR1,ALDH18A1,SHMT2,SLC1A3,AASS,SEPHS2,PHGDH
13_Member	GO Biological Processes	GO:1901607	alpha-amino acid biosynthetic process	-5.46723	-3.82761	11/67	790,1491,2744,2806,4522,5831,5832,6472,10157,22928,26227	CAD,CTH,GLS,GOT2,MTHFD1,PYCR1,ALDH18A1,SHMT2,AASS,SEPHS2,PHGDH
13_Member	GO Biological Processes	GO:0009070	serine family amino acid biosynthetic process	-3.5485	-2.19422	5/21	1491,4522,6472,22928,26227	CTH,MTHFD1,SHMT2,SEPHS2,PHGDH
13_Member	GO Biological Processes	GO:0009069	serine family amino acid metabolic process	-2.28394	-1.16415	5/39	1491,4522,6472,22928,26227	CTH,MTHFD1,SHMT2,SEPHS2,PHGDH
14_Summary	Reactome Gene Sets	R-HSA-162906	HIV Infection	-18.1957	-15.7907	39/231	160,161,162,163,164,292,293,902,1022,1025,1104,1173,2547,3159,3836,3837,3978,4686,5430,5693,5707,5709,5710,5905,6749,6829,7514,7520,7936,8148,9818,9972,10053,10762,11168,11198,23198,25920,51497	AP2A1,AP2A2,AP1B1,AP2B1,AP1G1,SLC25A5,SLC25A6,CCNH,CDK7,CDK9,RCC1,AP2M1,XRCC6,HMGA1,KPNA1,KPNB1,LIG1,NCBP1,POLR2A,PSMB5,PSMD1,PSMD3,PSMD4,RANGAP1,SSRP1,SUPT5H,XPO1,XRCC5,NELFE,TAF15,NUP58,NUP153,AP1M2,NUP50,PSIP1,SUPT16H,PSME4,NELFB,NELFCD
14_Member	Reactome Gene Sets	R-HSA-162906	HIV Infection	-18.1957	-15.7907	39/231	160,161,162,163,164,292,293,902,1022,1025,1104,1173,2547,3159,3836,3837,3978,4686,5430,5693,5707,5709,5710,5905,6749,6829,7514,7520,7936,8148,9818,9972,10053,10762,11168,11198,23198,25920,51497	AP2A1,AP2A2,AP1B1,AP2B1,AP1G1,SLC25A5,SLC25A6,CCNH,CDK7,CDK9,RCC1,AP2M1,XRCC6,HMGA1,KPNA1,KPNB1,LIG1,NCBP1,POLR2A,PSMB5,PSMD1,PSMD3,PSMD4,RANGAP1,SSRP1,SUPT5H,XPO1,XRCC5,NELFE,TAF15,NUP58,NUP153,AP1M2,NUP50,PSIP1,SUPT16H,PSME4,NELFB,NELFCD
14_Member	Reactome Gene Sets	R-HSA-162909	Host Interactions of HIV factors	-13.2334	-10.9978	25/130	160,161,162,163,164,292,293,1025,1104,1173,3159,3836,3837,5693,5707,5709,5710,5905,7514,9818,9972,10053,10762,11168,23198	AP2A1,AP2A2,AP1B1,AP2B1,AP1G1,SLC25A5,SLC25A6,CDK9,RCC1,AP2M1,HMGA1,KPNA1,KPNB1,PSMB5,PSMD1,PSMD3,PSMD4,RANGAP1,XPO1,NUP58,NUP153,AP1M2,NUP50,PSIP1,PSME4
15_Summary	GO Biological Processes	GO:0043484	regulation of RNA splicing	-17.3509	-14.9837	34/182	1153,1655,2332,2521,2926,3185,3187,3188,3190,4686,4691,5430,5935,6207,6231,6426,6428,6430,6431,7072,7536,8087,9584,9991,10521,10657,10658,11338,22827,26528,27339,54502,54845,92906,1025,55677,79577,79869,4670,23028,1653,9416,9879,11168,51747	CIRBP,DDX5,FMR1,FUS,GRSF1,HNRNPF,HNRNPH1,HNRNPH2,HNRNPK,NCBP1,NCL,POLR2A,RBM3,RPS13,RPS26,SRSF1,SRSF3,SRSF5,SRSF6,TIA1,SF1,FXR1,RBM39,PTBP3,DDX17,KHDRBS1,CELF1,U2AF2,PUF60,DAZAP1,PRPF19,RBM47,ESRP1,HNRNPLL,CDK9,IWS1,CDC73,CPSF7,HNRNPM,KDM1A,DDX1,DDX23,DDX46,PSIP1,LUC7L3
15_Member	GO Biological Processes	GO:0043484	regulation of RNA splicing	-17.3509	-14.9837	34/182	1153,1655,2332,2521,2926,3185,3187,3188,3190,4686,4691,5430,5935,6207,6231,6426,6428,6430,6431,7072,7536,8087,9584,9991,10521,10657,10658,11338,22827,26528,27339,54502,54845,92906	CIRBP,DDX5,FMR1,FUS,GRSF1,HNRNPF,HNRNPH1,HNRNPH2,HNRNPK,NCBP1,NCL,POLR2A,RBM3,RPS13,RPS26,SRSF1,SRSF3,SRSF5,SRSF6,TIA1,SF1,FXR1,RBM39,PTBP3,DDX17,KHDRBS1,CELF1,U2AF2,PUF60,DAZAP1,PRPF19,RBM47,ESRP1,HNRNPLL
15_Member	GO Biological Processes	GO:0050684	regulation of mRNA processing	-12.54	-10.3459	25/139	1025,1153,1655,2332,3190,4686,4691,5935,6428,6431,7072,7536,8087,9584,10521,10657,10658,11338,22827,26528,27339,54502,55677,79577,79869	CDK9,CIRBP,DDX5,FMR1,HNRNPK,NCBP1,NCL,RBM3,SRSF3,SRSF6,TIA1,SF1,FXR1,RBM39,DDX17,KHDRBS1,CELF1,U2AF2,PUF60,DAZAP1,PRPF19,RBM47,IWS1,CDC73,CPSF7
15_Member	GO Biological Processes	GO:0048024	regulation of mRNA splicing, via spliceosome	-11.3199	-9.17458	21/108	1153,1655,2332,3190,4686,4691,5935,6428,6431,7072,7536,8087,9584,10521,10657,10658,11338,22827,26528,27339,54502	CIRBP,DDX5,FMR1,HNRNPK,NCBP1,NCL,RBM3,SRSF3,SRSF6,TIA1,SF1,FXR1,RBM39,DDX17,KHDRBS1,CELF1,U2AF2,PUF60,DAZAP1,PRPF19,RBM47
15_Member	GO Biological Processes	GO:0000380	alternative mRNA splicing, via spliceosome	-7.14509	-5.33469	8/21	1655,4670,4686,6426,6431,10521,22827,23028	DDX5,HNRNPM,NCBP1,SRSF1,SRSF6,DDX17,PUF60,KDM1A
15_Member	GO Biological Processes	GO:0000245	spliceosomal complex assembly	-5.47998	-3.8338	13/94	1653,4686,6426,6430,6431,7536,9416,9879,10658,11168,22827,27339,51747	DDX1,NCBP1,SRSF1,SRSF5,SRSF6,SF1,DDX23,DDX46,CELF1,PSIP1,PUF60,PRPF19,LUC7L3
15_Member	GO Biological Processes	GO:0000381	regulation of alternative mRNA splicing, via spliceosome	-5.36399	-3.7461	10/56	1655,2332,6431,7072,8087,10521,10657,10658,22827,54502	DDX5,FMR1,SRSF6,TIA1,FXR1,DDX17,KHDRBS1,CELF1,PUF60,RBM47
15_Member	GO Biological Processes	GO:0006376	mRNA splice site selection	-4.11213	-2.66683	8/49	6426,6430,6431,7536,10658,11168,22827,51747	SRSF1,SRSF5,SRSF6,SF1,CELF1,PSIP1,PUF60,LUC7L3
16_Summary	WikiPathways	WP3888	VEGFA-VEGFR2 signaling pathway	-16.6433	-14.285	51/432	31,160,207,598,998,1267,1499,1500,1977,1981,1982,2058,2060,2130,2314,2926,4343,4691,4790,4860,5496,5499,5530,5606,5710,5770,6125,6129,6142,6154,6205,6595,6714,6729,7086,8027,8402,8664,8667,8826,9100,9146,9584,9898,10399,10525,10963,22820,26986,27044,81567	ACACA,AP2A1,AKT1,BCL2L1,CDC42,CNP,CTNNB1,CTNND1,EIF4E,EIF4G1,EIF4G2,EPRS1,EPS15,EWSR1,FLII,GRSF1,MOV10,NCL,NFKB1,PNP,PPM1G,PPP1CA,PPP3CA,MAP2K3,PSMD4,PTPN1,RPL5,RPL7,RPL18A,RPL26,RPS11,SMARCA2,SRC,SRP54,TKT,STAM,SLC25A11,EIF3D,EIF3H,IQGAP1,USP10,HGS,RBM39,UBAP2L,RACK1,HYOU1,STIP1,COPG1,PABPC1,SND1,TXNDC5
16_Member	WikiPathways	WP3888	VEGFA-VEGFR2 signaling pathway	-16.6433	-14.285	51/432	31,160,207,598,998,1267,1499,1500,1977,1981,1982,2058,2060,2130,2314,2926,4343,4691,4790,4860,5496,5499,5530,5606,5710,5770,6125,6129,6142,6154,6205,6595,6714,6729,7086,8027,8402,8664,8667,8826,9100,9146,9584,9898,10399,10525,10963,22820,26986,27044,81567	ACACA,AP2A1,AKT1,BCL2L1,CDC42,CNP,CTNNB1,CTNND1,EIF4E,EIF4G1,EIF4G2,EPRS1,EPS15,EWSR1,FLII,GRSF1,MOV10,NCL,NFKB1,PNP,PPM1G,PPP1CA,PPP3CA,MAP2K3,PSMD4,PTPN1,RPL5,RPL7,RPL18A,RPL26,RPS11,SMARCA2,SRC,SRP54,TKT,STAM,SLC25A11,EIF3D,EIF3H,IQGAP1,USP10,HGS,RBM39,UBAP2L,RACK1,HYOU1,STIP1,COPG1,PABPC1,SND1,TXNDC5
17_Summary	GO Biological Processes	GO:0061024	membrane organization	-16.3306	-13.9767	69/754	207,215,292,293,488,598,617,998,1104,1173,1267,1514,2348,2580,3313,4580,4864,4905,4976,5018,5286,5537,5872,6548,6812,8027,8301,8729,8773,8943,9093,9146,9368,9694,9868,9919,10059,10105,10243,10328,10452,10483,10577,10651,10802,10989,22848,23065,23136,25777,53407,54927,55735,55750,55754,55770,55971,56851,58485,60684,64398,65082,85377,92609,93974,117145,286410,375056,440026,162,164,537,738,983,2801,…	AKT1,ABCD1,SLC25A5,SLC25A6,ATP2A2,BCL2L1,BCS1L,CDC42,RCC1,AP2M1,CNP,CTSL,FOLR1,GAK,HSPA9,MTX1,NPC1,NSF,OPA1,OXA1L,PIK3C2A,PPP6C,RAB13,SLC9A1,STXBP1,STAM,PICALM,GBF1,SNAP23,AP3D1,DNAJA3,HGS,NHERF1,EMC2,TOMM70,SEC16A,DNM1L,PPIF,GPHN,EMC8,TOMM40,SEC23B,NPC2,MTX2,SEC24A,IMMT,AAK1,EMC1,EPB41L3,SUN2,STX18,CHCHD3,DNAJC11,AGK,TMEM30A,EXOC2,BAIAP2L1,EMC7,TRAPPC1,TRAPPC11,PALS1,VPS33A,MICALL1,TIMM50,ATP5IF…
17_Member	GO Biological Processes	GO:0061024	membrane organization	-16.3306	-13.9767	69/754	207,215,292,293,488,598,617,998,1104,1173,1267,1514,2348,2580,3313,4580,4864,4905,4976,5018,5286,5537,5872,6548,6812,8027,8301,8729,8773,8943,9093,9146,9368,9694,9868,9919,10059,10105,10243,10328,10452,10483,10577,10651,10802,10989,22848,23065,23136,25777,53407,54927,55735,55750,55754,55770,55971,56851,58485,60684,64398,65082,85377,92609,93974,117145,286410,375056,440026	AKT1,ABCD1,SLC25A5,SLC25A6,ATP2A2,BCL2L1,BCS1L,CDC42,RCC1,AP2M1,CNP,CTSL,FOLR1,GAK,HSPA9,MTX1,NPC1,NSF,OPA1,OXA1L,PIK3C2A,PPP6C,RAB13,SLC9A1,STXBP1,STAM,PICALM,GBF1,SNAP23,AP3D1,DNAJA3,HGS,NHERF1,EMC2,TOMM70,SEC16A,DNM1L,PPIF,GPHN,EMC8,TOMM40,SEC23B,NPC2,MTX2,SEC24A,IMMT,AAK1,EMC1,EPB41L3,SUN2,STX18,CHCHD3,DNAJC11,AGK,TMEM30A,EXOC2,BAIAP2L1,EMC7,TRAPPC1,TRAPPC11,PALS1,VPS33A,MICALL1,TIMM50,ATP5IF…
17_Member	GO Biological Processes	GO:0010256	endomembrane system organization	-10.2768	-8.19913	47/549	162,164,207,215,488,537,738,983,998,1104,2348,2580,2801,4905,8027,8729,8773,8943,9146,9183,9368,9694,9897,9919,10328,10565,23065,23122,23136,23325,25777,26985,50999,51014,53407,55151,55627,55971,56851,57488,60684,64398,64400,79585,85377,375056,440026	AP1B1,AP1G1,AKT1,ABCD1,ATP2A2,ATP6AP1,VPS51,CDK1,CDC42,RCC1,FOLR1,GAK,GOLGA2,NSF,STAM,GBF1,SNAP23,AP3D1,HGS,ZW10,NHERF1,EMC2,WASHC5,SEC16A,EMC8,ARFGEF1,EMC1,CLASP2,EPB41L3,WASHC4,SUN2,AP3M1,TMED5,TMED7,STX18,TMEM38B,SMPD4,BAIAP2L1,EMC7,ESYT2,TRAPPC11,PALS1,AKTIP,CORO7,MICALL1,MIA3,TMEM41B
17_Member	GO Biological Processes	GO:0016050	vesicle organization	-6.57636	-4.82239	29/339	162,164,526,537,1173,2060,5537,5872,6272,6812,8027,8301,8729,8773,8943,9146,9765,9897,9919,10483,10802,23325,23607,26985,58485,60684,64400,65082,375056	AP1B1,AP1G1,ATP6V1B2,ATP6AP1,AP2M1,EPS15,PPP6C,RAB13,SORT1,STXBP1,STAM,PICALM,GBF1,SNAP23,AP3D1,HGS,ZFYVE16,WASHC5,SEC16A,SEC23B,SEC24A,WASHC4,CD2AP,AP3M1,TRAPPC1,TRAPPC11,AKTIP,VPS33A,MIA3
18_Summary	Reactome Gene Sets	R-HSA-1640170	Cell Cycle	-15.9593	-13.6184	65/692	207,902,983,1017,1022,1062,1104,1459,1781,2801,3796,3837,3978,4172,4173,4174,4175,4176,4361,5424,5430,5500,5501,5527,5528,5537,5693,5707,5709,5710,5905,5928,5931,5982,5983,5984,5985,6232,6714,7029,7112,7153,7277,7283,7514,8467,9183,9184,9793,9818,9918,9972,10121,10762,23122,23198,23224,23243,23244,23397,23595,25777,29945,55055,55920,998,1499,3831,6242,8826,10095,10096,10097,10109,10787,23028,30849	AKT1,CCNH,CDK1,CDK2,CDK7,CENPE,RCC1,CSNK2A2,DYNC1I2,GOLGA2,KIF2A,KPNB1,LIG1,MCM3,MCM4,MCM5,MCM6,MCM7,MRE11,POLD1,POLR2A,PPP1CB,PPP1CC,PPP2R5C,PPP2R5D,PPP6C,PSMB5,PSMD1,PSMD3,PSMD4,RANGAP1,RBBP4,RBBP7,RFC2,RFC3,RFC4,RFC5,RPS27,SRC,TFDP2,TMPO,TOP2A,TUBA4A,TUBG1,XPO1,SMARCA5,ZW10,BUB3,CKAP5,NUP58,NCAPD2,NUP153,ACTR1A,NUP50,CLASP2,PSME4,SYNE2,ANKRD28,PDS5A,NCAPH,ORC3,SUN2,ANAPC4,ZWILCH,RCC2,CDC42,CTN…
18_Member	Reactome Gene Sets	R-HSA-1640170	Cell Cycle	-15.9593	-13.6184	65/692	207,902,983,1017,1022,1062,1104,1459,1781,2801,3796,3837,3978,4172,4173,4174,4175,4176,4361,5424,5430,5500,5501,5527,5528,5537,5693,5707,5709,5710,5905,5928,5931,5982,5983,5984,5985,6232,6714,7029,7112,7153,7277,7283,7514,8467,9183,9184,9793,9818,9918,9972,10121,10762,23122,23198,23224,23243,23244,23397,23595,25777,29945,55055,55920	AKT1,CCNH,CDK1,CDK2,CDK7,CENPE,RCC1,CSNK2A2,DYNC1I2,GOLGA2,KIF2A,KPNB1,LIG1,MCM3,MCM4,MCM5,MCM6,MCM7,MRE11,POLD1,POLR2A,PPP1CB,PPP1CC,PPP2R5C,PPP2R5D,PPP6C,PSMB5,PSMD1,PSMD3,PSMD4,RANGAP1,RBBP4,RBBP7,RFC2,RFC3,RFC4,RFC5,RPS27,SRC,TFDP2,TMPO,TOP2A,TUBA4A,TUBG1,XPO1,SMARCA5,ZW10,BUB3,CKAP5,NUP58,NCAPD2,NUP153,ACTR1A,NUP50,CLASP2,PSME4,SYNE2,ANKRD28,PDS5A,NCAPH,ORC3,SUN2,ANAPC4,ZWILCH,RCC2
18_Member	Reactome Gene Sets	R-HSA-69278	Cell Cycle, Mitotic	-15.5455	-13.2172	57/561	207,902,983,1017,1022,1062,1104,1459,1781,2801,3796,3837,3978,4172,4173,4174,4175,4176,5424,5500,5501,5527,5528,5693,5707,5709,5710,5905,5928,5982,5983,5984,5985,6232,6714,7029,7112,7153,7277,7283,7514,9183,9184,9793,9818,9918,9972,10121,10762,23122,23198,23244,23397,23595,29945,55055,55920	AKT1,CCNH,CDK1,CDK2,CDK7,CENPE,RCC1,CSNK2A2,DYNC1I2,GOLGA2,KIF2A,KPNB1,LIG1,MCM3,MCM4,MCM5,MCM6,MCM7,POLD1,PPP1CB,PPP1CC,PPP2R5C,PPP2R5D,PSMB5,PSMD1,PSMD3,PSMD4,RANGAP1,RBBP4,RFC2,RFC3,RFC4,RFC5,RPS27,SRC,TFDP2,TMPO,TOP2A,TUBA4A,TUBG1,XPO1,ZW10,BUB3,CKAP5,NUP58,NCAPD2,NUP153,ACTR1A,NUP50,CLASP2,PSME4,PDS5A,NCAPH,ORC3,ANAPC4,ZWILCH,RCC2
18_Member	Reactome Gene Sets	R-HSA-69620	Cell Cycle Checkpoints	-11.0846	-8.94734	34/293	983,1017,1062,1781,3796,4172,4173,4174,4175,4176,4361,5501,5527,5528,5693,5707,5709,5710,5905,5982,5983,5984,5985,6232,7514,9183,9184,9793,23122,23198,23595,29945,55055,55920	CDK1,CDK2,CENPE,DYNC1I2,KIF2A,MCM3,MCM4,MCM5,MCM6,MCM7,MRE11,PPP1CC,PPP2R5C,PPP2R5D,PSMB5,PSMD1,PSMD3,PSMD4,RANGAP1,RFC2,RFC3,RFC4,RFC5,RPS27,XPO1,ZW10,BUB3,CKAP5,CLASP2,PSME4,ORC3,ANAPC4,ZWILCH,RCC2
18_Member	Reactome Gene Sets	R-HSA-68882	Mitotic Anaphase	-9.46767	-7.42355	28/236	983,1062,1104,1781,3796,3837,5501,5527,5528,5693,5707,5709,5710,5905,6232,7112,7277,7514,9183,9184,9793,9818,23122,23198,23244,29945,55055,55920	CDK1,CENPE,RCC1,DYNC1I2,KIF2A,KPNB1,PPP1CC,PPP2R5C,PPP2R5D,PSMB5,PSMD1,PSMD3,PSMD4,RANGAP1,RPS27,TMPO,TUBA4A,XPO1,ZW10,BUB3,CKAP5,NUP58,CLASP2,PSME4,PDS5A,ANAPC4,ZWILCH,RCC2
18_Member	Reactome Gene Sets	R-HSA-2555396	Mitotic Metaphase and Anaphase	-9.42502	-7.38304	28/237	983,1062,1104,1781,3796,3837,5501,5527,5528,5693,5707,5709,5710,5905,6232,7112,7277,7514,9183,9184,9793,9818,23122,23198,23244,29945,55055,55920	CDK1,CENPE,RCC1,DYNC1I2,KIF2A,KPNB1,PPP1CC,PPP2R5C,PPP2R5D,PSMB5,PSMD1,PSMD3,PSMD4,RANGAP1,RPS27,TMPO,TUBA4A,XPO1,ZW10,BUB3,CKAP5,NUP58,CLASP2,PSME4,PDS5A,ANAPC4,ZWILCH,RCC2
18_Member	Reactome Gene Sets	R-HSA-68886	M Phase	-8.08386	-6.18617	36/418	983,1062,1104,1459,1781,2801,3796,3837,5501,5527,5528,5693,5707,5709,5710,5905,6232,7112,7277,7283,7514,9183,9184,9793,9818,9918,9972,10121,10762,23122,23198,23244,23397,29945,55055,55920	CDK1,CENPE,RCC1,CSNK2A2,DYNC1I2,GOLGA2,KIF2A,KPNB1,PPP1CC,PPP2R5C,PPP2R5D,PSMB5,PSMD1,PSMD3,PSMD4,RANGAP1,RPS27,TMPO,TUBA4A,TUBG1,XPO1,ZW10,BUB3,CKAP5,NUP58,NCAPD2,NUP153,ACTR1A,NUP50,CLASP2,PSME4,PDS5A,NCAPH,ANAPC4,ZWILCH,RCC2
18_Member	Reactome Gene Sets	R-HSA-2467813	Separation of Sister Chromatids	-8.01928	-6.1307	23/191	1062,1781,3796,5501,5527,5528,5693,5707,5709,5710,5905,6232,7277,7514,9183,9184,9793,23122,23198,23244,29945,55055,55920	CENPE,DYNC1I2,KIF2A,PPP1CC,PPP2R5C,PPP2R5D,PSMB5,PSMD1,PSMD3,PSMD4,RANGAP1,RPS27,TUBA4A,XPO1,ZW10,BUB3,CKAP5,CLASP2,PSME4,PDS5A,ANAPC4,ZWILCH,RCC2
18_Member	Reactome Gene Sets	R-HSA-2500257	Resolution of Sister Chromatid Cohesion	-7.56791	-5.7112	18/126	983,1062,1781,3796,5501,5527,5528,5905,6232,7277,7514,9183,9184,9793,23122,23244,55055,55920	CDK1,CENPE,DYNC1I2,KIF2A,PPP1CC,PPP2R5C,PPP2R5D,RANGAP1,RPS27,TUBA4A,XPO1,ZW10,BUB3,CKAP5,CLASP2,PDS5A,ZWILCH,RCC2
18_Member	Reactome Gene Sets	R-HSA-68877	Mitotic Prometaphase	-7.47641	-5.63209	23/204	983,1062,1459,1781,3796,5501,5527,5528,5905,6232,7277,7283,7514,9183,9184,9793,9918,10121,23122,23244,23397,55055,55920	CDK1,CENPE,CSNK2A2,DYNC1I2,KIF2A,PPP1CC,PPP2R5C,PPP2R5D,RANGAP1,RPS27,TUBA4A,TUBG1,XPO1,ZW10,BUB3,CKAP5,NCAPD2,ACTR1A,CLASP2,PDS5A,NCAPH,ZWILCH,RCC2
18_Member	Reactome Gene Sets	R-HSA-195258	RHO GTPase Effectors	-7.45054	-5.61027	30/327	998,1062,1499,1781,3796,3831,5500,5501,5527,5528,5905,6232,6242,6714,7277,7514,8826,9183,9184,9793,10095,10096,10097,10109,10787,23028,23122,30849,55055,55920	CDC42,CENPE,CTNNB1,DYNC1I2,KIF2A,KLC1,PPP1CB,PPP1CC,PPP2R5C,PPP2R5D,RANGAP1,RPS27,RTKN,SRC,TUBA4A,XPO1,IQGAP1,ZW10,BUB3,CKAP5,ARPC1B,ACTR3,ACTR2,ARPC2,NCKAP1,KDM1A,CLASP2,PIK3R4,ZWILCH,RCC2
18_Member	Reactome Gene Sets	R-HSA-141424	Amplification of signal from the kinetochores	-6.93722	-5.14526	15/96	1062,1781,3796,5501,5527,5528,5905,6232,7514,9183,9184,9793,23122,55055,55920	CENPE,DYNC1I2,KIF2A,PPP1CC,PPP2R5C,PPP2R5D,RANGAP1,RPS27,XPO1,ZW10,BUB3,CKAP5,CLASP2,ZWILCH,RCC2
18_Member	Reactome Gene Sets	R-HSA-141444	Amplification of signal from unattached kinetochores via a MAD2 inhibitory signal	-6.93722	-5.14526	15/96	1062,1781,3796,5501,5527,5528,5905,6232,7514,9183,9184,9793,23122,55055,55920	CENPE,DYNC1I2,KIF2A,PPP1CC,PPP2R5C,PPP2R5D,RANGAP1,RPS27,XPO1,ZW10,BUB3,CKAP5,CLASP2,ZWILCH,RCC2
18_Member	Reactome Gene Sets	R-HSA-5663220	RHO GTPases Activate Formins	-6.85154	-5.07378	18/140	998,1062,1781,3796,5501,5527,5528,5905,6232,6714,7277,7514,9183,9184,9793,23122,55055,55920	CDC42,CENPE,DYNC1I2,KIF2A,PPP1CC,PPP2R5C,PPP2R5D,RANGAP1,RPS27,SRC,TUBA4A,XPO1,ZW10,BUB3,CKAP5,CLASP2,ZWILCH,RCC2
18_Member	Reactome Gene Sets	R-HSA-69618	Mitotic Spindle Checkpoint	-6.74424	-4.97683	16/113	1062,1781,3796,5501,5527,5528,5905,6232,7514,9183,9184,9793,23122,29945,55055,55920	CENPE,DYNC1I2,KIF2A,PPP1CC,PPP2R5C,PPP2R5D,RANGAP1,RPS27,XPO1,ZW10,BUB3,CKAP5,CLASP2,ANAPC4,ZWILCH,RCC2
18_Member	Reactome Gene Sets	R-HSA-9648025	EML4 and NUDC in mitotic spindle formation	-6.5321	-4.78578	16/117	1062,1781,3796,5501,5527,5528,5905,6232,7277,7514,9183,9184,9793,23122,55055,55920	CENPE,DYNC1I2,KIF2A,PPP1CC,PPP2R5C,PPP2R5D,RANGAP1,RPS27,TUBA4A,XPO1,ZW10,BUB3,CKAP5,CLASP2,ZWILCH,RCC2
19_Summary	Reactome Gene Sets	R-HSA-3700989	Transcriptional Regulation by TP53	-15.5935	-13.2611	45/362	207,902,983,1017,1020,1022,1025,1108,1327,1459,2744,2936,3276,4343,4361,4436,4513,5430,5527,5928,5931,5982,5983,5984,5985,6749,6829,7029,7874,7936,8148,10128,10670,10848,11198,23019,25904,25920,29883,51204,51497,54815,55215,55571,64065,1642,3978,3980,5424,7515,8451,27339,56949,142,2547,2956,5591,7520,11284,2140,3838,7353,8467,9100,51035,55183,6742,5537,23243,4176,1499,7153	AKT1,CCNH,CDK1,CDK2,CDK5,CDK7,CDK9,CHD4,COX4I1,CSNK2A2,GLS,GSR,PRMT1,MOV10,MRE11,MSH2,COX2,POLR2A,PPP2R5C,RBBP4,RBBP7,RFC2,RFC3,RFC4,RFC5,SSRP1,SUPT5H,TFDP2,USP7,NELFE,TAF15,LRPPRC,RRAGA,PPP1R13L,SUPT16H,CNOT1,CNOT10,NELFB,CNOT7,TACO1,NELFCD,GATAD2A,FANCI,CNOT11,PERP,DDB1,LIG1,LIG3,POLD1,XRCC1,CUL4A,PRPF19,XAB2,PARP1,XRCC6,MSH6,PRKDC,XRCC5,PNKP,EYA3,KPNA2,UFD1,SMARCA5,USP10,UBXN1,RIF1,SSBP1,PPP6C…
19_Member	Reactome Gene Sets	R-HSA-3700989	Transcriptional Regulation by TP53	-15.5935	-13.2611	45/362	207,902,983,1017,1020,1022,1025,1108,1327,1459,2744,2936,3276,4343,4361,4436,4513,5430,5527,5928,5931,5982,5983,5984,5985,6749,6829,7029,7874,7936,8148,10128,10670,10848,11198,23019,25904,25920,29883,51204,51497,54815,55215,55571,64065	AKT1,CCNH,CDK1,CDK2,CDK5,CDK7,CDK9,CHD4,COX4I1,CSNK2A2,GLS,GSR,PRMT1,MOV10,MRE11,MSH2,COX2,POLR2A,PPP2R5C,RBBP4,RBBP7,RFC2,RFC3,RFC4,RFC5,SSRP1,SUPT5H,TFDP2,USP7,NELFE,TAF15,LRPPRC,RRAGA,PPP1R13L,SUPT16H,CNOT1,CNOT10,NELFB,CNOT7,TACO1,NELFCD,GATAD2A,FANCI,CNOT11,PERP
19_Member	Reactome Gene Sets	R-HSA-6782210	Gap-filling DNA repair synthesis and ligation in TC-NER	-10.4129	-8.32352	16/65	902,1022,1642,3978,3980,5424,5430,5982,5983,5984,5985,7515,7874,8451,27339,56949	CCNH,CDK7,DDB1,LIG1,LIG3,POLD1,POLR2A,RFC2,RFC3,RFC4,RFC5,XRCC1,USP7,CUL4A,PRPF19,XAB2
19_Member	WikiPathways	WP4946	DNA repair pathways, full network	-10.4055	-8.31849	21/120	142,902,1022,1642,2547,2956,3978,3980,4361,4436,5424,5591,5982,5983,5984,5985,7515,7520,8451,11284,55215	PARP1,CCNH,CDK7,DDB1,XRCC6,MSH6,LIG1,LIG3,MRE11,MSH2,POLD1,PRKDC,RFC2,RFC3,RFC4,RFC5,XRCC1,XRCC5,CUL4A,PNKP,FANCI
19_Member	Reactome Gene Sets	R-HSA-6781827	Transcription-Coupled Nucleotide Excision Repair (TC-NER)	-9.05564	-7.05056	16/79	902,1022,1642,3978,3980,5424,5430,5982,5983,5984,5985,7515,7874,8451,27339,56949	CCNH,CDK7,DDB1,LIG1,LIG3,POLD1,POLR2A,RFC2,RFC3,RFC4,RFC5,XRCC1,USP7,CUL4A,PRPF19,XAB2
19_Member	Reactome Gene Sets	R-HSA-73894	DNA Repair	-8.8717	-6.88016	33/336	142,902,1017,1022,1642,2140,2547,2956,3838,3978,3980,4361,4436,5424,5430,5591,5982,5983,5984,5985,7353,7515,7520,7874,8451,8467,9100,11284,27339,51035,55183,55215,56949	PARP1,CCNH,CDK2,CDK7,DDB1,EYA3,XRCC6,MSH6,KPNA2,LIG1,LIG3,MRE11,MSH2,POLD1,POLR2A,PRKDC,RFC2,RFC3,RFC4,RFC5,UFD1,XRCC1,XRCC5,USP7,CUL4A,SMARCA5,USP10,PNKP,PRPF19,UBXN1,RIF1,FANCI,XAB2
19_Member	WikiPathways	WP5114	Nucleotide excision repair in xeroderma pigmentosum	-8.44986	-6.50522	15/75	142,902,1022,1642,3978,3980,5424,5982,5983,5984,5985,7515,7874,8451,56949	PARP1,CCNH,CDK7,DDB1,LIG1,LIG3,POLD1,RFC2,RFC3,RFC4,RFC5,XRCC1,USP7,CUL4A,XAB2
19_Member	KEGG Pathway	hsa03430	Mismatch repair	-8.09502	-6.1927	9/23	2956,3978,4436,5424,5982,5983,5984,5985,6742	MSH6,LIG1,MSH2,POLD1,RFC2,RFC3,RFC4,RFC5,SSBP1
19_Member	Reactome Gene Sets	R-HSA-5696398	Nucleotide Excision Repair	-7.64276	-5.78043	17/111	142,902,1022,1642,3978,3980,5424,5430,5982,5983,5984,5985,7515,7874,8451,27339,56949	PARP1,CCNH,CDK7,DDB1,LIG1,LIG3,POLD1,POLR2A,RFC2,RFC3,RFC4,RFC5,XRCC1,USP7,CUL4A,PRPF19,XAB2
19_Member	Reactome Gene Sets	R-HSA-5633007	Regulation of TP53 Activity	-7.33212	-5.50247	20/160	207,983,1017,1020,1108,1459,4361,5527,5928,5931,5982,5983,5984,5985,6749,7874,8148,10848,11198,54815	AKT1,CDK1,CDK2,CDK5,CHD4,CSNK2A2,MRE11,PPP2R5C,RBBP4,RBBP7,RFC2,RFC3,RFC4,RFC5,SSRP1,USP7,TAF15,PPP1R13L,SUPT16H,GATAD2A
19_Member	Reactome Gene Sets	R-HSA-6782135	Dual incision in TC-NER	-7.32322	-5.49489	13/66	902,1022,1642,5424,5430,5982,5983,5984,5985,7874,8451,27339,56949	CCNH,CDK7,DDB1,POLD1,POLR2A,RFC2,RFC3,RFC4,RFC5,USP7,CUL4A,PRPF19,XAB2
19_Member	Reactome Gene Sets	R-HSA-73933	Resolution of Abasic Sites (AP sites)	-6.91835	-5.12998	10/39	142,3978,3980,5424,5982,5983,5984,5985,7515,11284	PARP1,LIG1,LIG3,POLD1,RFC2,RFC3,RFC4,RFC5,XRCC1,PNKP
19_Member	WikiPathways	WP531	DNA mismatch repair	-6.78559	-5.01476	8/23	2956,3978,4436,5424,5982,5983,5984,5985	MSH6,LIG1,MSH2,POLD1,RFC2,RFC3,RFC4,RFC5
19_Member	Reactome Gene Sets	R-HSA-5696397	Gap-filling DNA repair synthesis and ligation in GG-NER	-6.46442	-4.72667	8/25	3978,3980,5424,5982,5983,5984,5985,7515	LIG1,LIG3,POLD1,RFC2,RFC3,RFC4,RFC5,XRCC1
19_Member	WikiPathways	WP4753	Nucleotide excision repair	-6.38406	-4.64949	10/44	902,1022,1642,3978,5424,5982,5983,5984,5985,8451	CCNH,CDK7,DDB1,LIG1,POLD1,RFC2,RFC3,RFC4,RFC5,CUL4A
19_Member	CORUM	CORUM:2200	RFC2-5 subcomplex	-6.14988	-4.4379	4/4	5982,5983,5984,5985	RFC2,RFC3,RFC4,RFC5
19_Member	KEGG Pathway	hsa03420	Nucleotide excision repair	-6.0988	-4.3908	10/47	902,1022,1642,3978,5424,5982,5983,5984,5985,8451	CCNH,CDK7,DDB1,LIG1,POLD1,RFC2,RFC3,RFC4,RFC5,CUL4A
19_Member	Reactome Gene Sets	R-HSA-5696399	Global Genome Nucleotide Excision Repair (GG-NER)	-6.04651	-4.3454	13/84	142,902,1022,1642,3978,3980,5424,5982,5983,5984,5985,7515,8451	PARP1,CCNH,CDK7,DDB1,LIG1,LIG3,POLD1,RFC2,RFC3,RFC4,RFC5,XRCC1,CUL4A
19_Member	Reactome Gene Sets	R-HSA-5693532	DNA Double-Strand Break Repair	-5.67031	-4.004	18/168	142,1017,2140,2547,3838,3980,4361,5424,5591,5982,5983,5984,5985,7515,7520,8467,51035,55183	PARP1,CDK2,EYA3,XRCC6,KPNA2,LIG3,MRE11,POLD1,PRKDC,RFC2,RFC3,RFC4,RFC5,XRCC1,XRCC5,SMARCA5,UBXN1,RIF1
19_Member	CORUM	CORUM:1003	RC complex (Replication competent complex)	-5.63049	-3.97032	5/9	1017,5982,5983,5984,5985	CDK2,RFC2,RFC3,RFC4,RFC5
19_Member	CORUM	CORUM:2199	CHTF18-RFC2-5 complex	-5.46108	-3.82761	4/5	5982,5983,5984,5985	RFC2,RFC3,RFC4,RFC5
19_Member	CORUM	CORUM:2201	PCNA-RFC2-5 complex	-5.46108	-3.82761	4/5	5982,5983,5984,5985	RFC2,RFC3,RFC4,RFC5
19_Member	CORUM	CORUM:2202	CHTF18-RFC2-5 complex	-5.46108	-3.82761	4/5	5982,5983,5984,5985	RFC2,RFC3,RFC4,RFC5
19_Member	CORUM	CORUM:266	RAD17-RFC complex	-5.46108	-3.82761	4/5	5982,5983,5984,5985	RFC2,RFC3,RFC4,RFC5
19_Member	CORUM	CORUM:270	RAD17-RFC complex	-5.46108	-3.82761	4/5	5982,5983,5984,5985	RFC2,RFC3,RFC4,RFC5
19_Member	CORUM	CORUM:277	RFC complex	-5.46108	-3.82761	4/5	5982,5983,5984,5985	RFC2,RFC3,RFC4,RFC5
19_Member	CORUM	CORUM:279	RFC complex	-5.46108	-3.82761	4/5	5982,5983,5984,5985	RFC2,RFC3,RFC4,RFC5
19_Member	CORUM	CORUM:2799	RFC complex	-5.46108	-3.82761	4/5	5982,5983,5984,5985	RFC2,RFC3,RFC4,RFC5
19_Member	CORUM	CORUM:2810	RAD17-RFC complex	-5.46108	-3.82761	4/5	5982,5983,5984,5985	RFC2,RFC3,RFC4,RFC5
19_Member	Reactome Gene Sets	R-HSA-110373	Resolution of AP sites via the multiple-nucleotide patch replacement pathway	-5.15935	-3.55962	7/26	142,3978,5424,5982,5983,5984,5985	PARP1,LIG1,POLD1,RFC2,RFC3,RFC4,RFC5
19_Member	Reactome Gene Sets	R-HSA-73893	DNA Damage Bypass	-5.06568	-3.48039	9/48	1642,5424,5982,5983,5984,5985,7353,8451,9100	DDB1,POLD1,RFC2,RFC3,RFC4,RFC5,UFD1,CUL4A,USP10
19_Member	CORUM	CORUM:2203	BRD4-RFC complex	-4.99412	-3.4177	4/6	5982,5983,5984,5985	RFC2,RFC3,RFC4,RFC5
19_Member	CORUM	CORUM:2797	PCNA-CHL12-RFC2-5 complex	-4.99412	-3.4177	4/6	5982,5983,5984,5985	RFC2,RFC3,RFC4,RFC5
19_Member	CORUM	CORUM:433	BASC complex (BRCA1-associated genome surveillance complex)	-4.86378	-3.30106	5/12	2956,4361,4436,5982,5984	MSH6,MRE11,MSH2,RFC2,RFC4
19_Member	Reactome Gene Sets	R-HSA-180786	Extension of Telomeres	-4.84085	-3.27955	9/51	1017,3978,5424,5537,5982,5983,5984,5985,23243	CDK2,LIG1,POLD1,PPP6C,RFC2,RFC3,RFC4,RFC5,ANKRD28
19_Member	Reactome Gene Sets	R-HSA-69186	Lagging Strand Synthesis	-4.79114	-3.23817	6/20	3978,5424,5982,5983,5984,5985	LIG1,POLD1,RFC2,RFC3,RFC4,RFC5
19_Member	Reactome Gene Sets	R-HSA-110314	Recognition of DNA damage by PCNA-containing replication complex	-4.71273	-3.1708	7/30	1642,5424,5982,5983,5984,5985,8451	DDB1,POLD1,RFC2,RFC3,RFC4,RFC5,CUL4A
19_Member	Reactome Gene Sets	R-HSA-5696400	Dual Incision in GG-NER	-4.69704	-3.1578	8/41	142,1642,5424,5982,5983,5984,5985,8451	PARP1,DDB1,POLD1,RFC2,RFC3,RFC4,RFC5,CUL4A
19_Member	Reactome Gene Sets	R-HSA-5651801	PCNA-Dependent Long Patch Base Excision Repair	-4.65581	-3.12457	6/21	3978,5424,5982,5983,5984,5985	LIG1,POLD1,RFC2,RFC3,RFC4,RFC5
19_Member	CORUM	CORUM:2804	CTF18-cohesion-RFC complex	-4.63629	-3.11548	4/7	5982,5983,5984,5985	RFC2,RFC3,RFC4,RFC5
19_Member	CORUM	CORUM:278	RFC core complex	-4.61169	-3.10082	3/3	5982,5984,5985	RFC2,RFC4,RFC5
19_Member	Reactome Gene Sets	R-HSA-69091	Polymerase switching	-4.4821	-2.98572	5/14	5424,5982,5983,5984,5985	POLD1,RFC2,RFC3,RFC4,RFC5
19_Member	Reactome Gene Sets	R-HSA-69109	Leading Strand Synthesis	-4.4821	-2.98572	5/14	5424,5982,5983,5984,5985	POLD1,RFC2,RFC3,RFC4,RFC5
19_Member	CORUM	CORUM:268	9-1-1-RAD17-RFC complex	-4.3454	-2.86575	4/8	5982,5983,5984,5985	RFC2,RFC3,RFC4,RFC5
19_Member	CORUM	CORUM:274	9-1-1-RAD17-RFC complex	-4.3454	-2.86575	4/8	5982,5983,5984,5985	RFC2,RFC3,RFC4,RFC5
19_Member	CORUM	CORUM:3070	CTF18-cohesion-RFC-POLH complex	-4.3454	-2.86575	4/8	5982,5983,5984,5985	RFC2,RFC3,RFC4,RFC5
19_Member	CORUM	CORUM:434	BASC (Ab 80) complex (BRCA1-associated genome surveillance complex)	-4.3454	-2.86575	4/8	2956,4436,5982,5984	MSH6,MSH2,RFC2,RFC4
19_Member	Reactome Gene Sets	R-HSA-6804756	Regulation of TP53 Activity through Phosphorylation	-4.13157	-2.68247	11/92	1017,1020,1459,4361,5982,5983,5984,5985,6749,8148,11198	CDK2,CDK5,CSNK2A2,MRE11,RFC2,RFC3,RFC4,RFC5,SSRP1,TAF15,SUPT16H
19_Member	Reactome Gene Sets	R-HSA-110313	Translesion synthesis by Y family DNA polymerases bypasses lesions on DNA template	-3.93324	-2.52029	7/39	5424,5982,5983,5984,5985,7353,9100	POLD1,RFC2,RFC3,RFC4,RFC5,UFD1,USP10
19_Member	Reactome Gene Sets	R-HSA-110320	Translesion Synthesis by POLH	-3.77058	-2.38103	5/19	5982,5983,5984,5985,7353	RFC2,RFC3,RFC4,RFC5,UFD1
19_Member	Reactome Gene Sets	R-HSA-73886	Chromosome Maintenance	-3.60316	-2.24136	13/141	1017,3978,5424,5430,5537,5928,5931,5982,5983,5984,5985,8467,23243	CDK2,LIG1,POLD1,POLR2A,PPP6C,RBBP4,RBBP7,RFC2,RFC3,RFC4,RFC5,SMARCA5,ANKRD28
19_Member	Reactome Gene Sets	R-HSA-5656169	Termination of translesion DNA synthesis	-3.55151	-2.19422	6/32	5424,5982,5983,5984,5985,9100	POLD1,RFC2,RFC3,RFC4,RFC5,USP10
19_Member	Reactome Gene Sets	R-HSA-73884	Base Excision Repair	-3.46544	-2.12371	10/92	142,3978,3980,5424,5982,5983,5984,5985,7515,11284	PARP1,LIG1,LIG3,POLD1,RFC2,RFC3,RFC4,RFC5,XRCC1,PNKP
19_Member	Reactome Gene Sets	R-HSA-174417	Telomere C-strand (Lagging Strand) Synthesis	-3.40149	-2.06863	6/34	3978,5424,5982,5983,5984,5985	LIG1,POLD1,RFC2,RFC3,RFC4,RFC5
19_Member	GO Biological Processes	GO:1900262	regulation of DNA-directed DNA polymerase activity	-3.38674	-2.05721	4/13	5982,5983,5984,5985	RFC2,RFC3,RFC4,RFC5
19_Member	GO Biological Processes	GO:1900264	positive regulation of DNA-directed DNA polymerase activity	-3.38674	-2.05721	4/13	5982,5983,5984,5985	RFC2,RFC3,RFC4,RFC5
19_Member	Reactome Gene Sets	R-HSA-9675135	Diseases of DNA repair	-3.18766	-1.89204	7/51	2956,4361,4436,5982,5983,5984,5985	MSH6,MRE11,MSH2,RFC2,RFC3,RFC4,RFC5
19_Member	Reactome Gene Sets	R-HSA-174411	Polymerase switching on the C-strand of the telomere	-3.09119	-1.81471	5/26	5424,5982,5983,5984,5985	POLD1,RFC2,RFC3,RFC4,RFC5
19_Member	Canonical Pathways	M46	PID ATR PATHWAY	-3.07012	-1.79693	6/39	1017,4176,5982,5983,5984,5985	CDK2,MCM7,RFC2,RFC3,RFC4,RFC5
19_Member	Reactome Gene Sets	R-HSA-110312	Translesion synthesis by REV1	-3.01117	-1.75066	4/16	5982,5983,5984,5985	RFC2,RFC3,RFC4,RFC5
19_Member	Reactome Gene Sets	R-HSA-5655862	Translesion synthesis by POLK	-2.90472	-1.66838	4/17	5982,5983,5984,5985	RFC2,RFC3,RFC4,RFC5
19_Member	Reactome Gene Sets	R-HSA-5656121	Translesion synthesis by POLI	-2.90472	-1.66838	4/17	5982,5983,5984,5985	RFC2,RFC3,RFC4,RFC5
19_Member	Reactome Gene Sets	R-HSA-157579	Telomere Maintenance	-2.76644	-1.55527	10/113	1017,3978,5424,5430,5537,5982,5983,5984,5985,23243	CDK2,LIG1,POLD1,POLR2A,PPP6C,RFC2,RFC3,RFC4,RFC5,ANKRD28
19_Member	WikiPathways	WP2363	Gastric cancer network 2	-2.66771	-1.47991	5/32	1499,5983,5984,7153,55215	CTNNB1,RFC3,RFC4,TOP2A,FANCI
19_Member	Canonical Pathways	M1	PID FANCONI PATHWAY	-2.63806	-1.45531	6/47	4361,5982,5983,5984,5985,55215	MRE11,RFC2,RFC3,RFC4,RFC5,FANCI
19_Member	Reactome Gene Sets	R-HSA-9709570	Impaired BRCA2 binding to RAD51	-2.49143	-1.33703	5/35	4361,5982,5983,5984,5985	MRE11,RFC2,RFC3,RFC4,RFC5
19_Member	Reactome Gene Sets	R-HSA-5685938	HDR through Single Strand Annealing (SSA)	-2.38413	-1.24791	5/37	4361,5982,5983,5984,5985	MRE11,RFC2,RFC3,RFC4,RFC5
19_Member	Reactome Gene Sets	R-HSA-5693616	Presynaptic phase of homologous DNA pairing and strand exchange	-2.23626	-1.12684	5/40	4361,5982,5983,5984,5985	MRE11,RFC2,RFC3,RFC4,RFC5
19_Member	Reactome Gene Sets	R-HSA-9675136	Diseases of DNA Double-Strand Break Repair	-2.19009	-1.08736	5/41	4361,5982,5983,5984,5985	MRE11,RFC2,RFC3,RFC4,RFC5
19_Member	Reactome Gene Sets	R-HSA-9701190	Defective homologous recombination repair (HRR) due to BRCA2 loss of function	-2.19009	-1.08736	5/41	4361,5982,5983,5984,5985	MRE11,RFC2,RFC3,RFC4,RFC5
19_Member	Reactome Gene Sets	R-HSA-5693538	Homology Directed Repair	-2.14436	-1.05016	10/138	142,1017,3980,4361,5424,5982,5983,5984,5985,7515	PARP1,CDK2,LIG3,MRE11,POLD1,RFC2,RFC3,RFC4,RFC5,XRCC1
19_Member	Reactome Gene Sets	R-HSA-5693579	Homologous DNA Pairing and Strand Exchange	-2.10195	-1.01516	5/43	4361,5982,5983,5984,5985	MRE11,RFC2,RFC3,RFC4,RFC5
20_Summary	GO Biological Processes	GO:0006260	DNA replication	-15.4556	-13.1355	33/196	142,983,1017,1025,3159,3978,3980,4172,4173,4174,4175,4176,4361,5424,5813,5928,5931,5965,5976,5982,5983,5984,5985,6742,6749,8208,9093,11198,11284,23595,25939,27000,222229,1653,1654,2547,7520,10146,7153,79621,1062,2801,3796,3837,4436,5591,7283,7515,8520,9131,9183,9918,10728,11331,23122,23244,23347,23397,26073,55183,1786,2956,6595,7029,1108,2140,9112,27339,56916,8467,26057,3329,4841,9730	PARP1,CDK1,CDK2,CDK9,HMGA1,LIG1,LIG3,MCM3,MCM4,MCM5,MCM6,MCM7,MRE11,POLD1,PURA,RBBP4,RBBP7,RECQL,UPF1,RFC2,RFC3,RFC4,RFC5,SSBP1,SSRP1,CHAF1B,DNAJA3,SUPT16H,PNKP,ORC3,SAMHD1,DNAJC2,LRWD1,DDX1,DDX3X,XRCC6,XRCC5,G3BP1,TOP2A,RNASEH2B,CENPE,GOLGA2,KIF2A,KPNB1,MSH2,PRKDC,TUBG1,XRCC1,HAT1,AIFM1,ZW10,NCAPD2,PTGES3,PHB2,CLASP2,PDS5A,SMCHD1,NCAPH,POLDIP2,RIF1,DNMT1,MSH6,SMARCA2,TFDP2,CHD4,EYA3,MTA1,PRPF19,…
20_Member	GO Biological Processes	GO:0006260	DNA replication	-15.4556	-13.1355	33/196	142,983,1017,1025,3159,3978,3980,4172,4173,4174,4175,4176,4361,5424,5813,5928,5931,5965,5976,5982,5983,5984,5985,6742,6749,8208,9093,11198,11284,23595,25939,27000,222229	PARP1,CDK1,CDK2,CDK9,HMGA1,LIG1,LIG3,MCM3,MCM4,MCM5,MCM6,MCM7,MRE11,POLD1,PURA,RBBP4,RBBP7,RECQL,UPF1,RFC2,RFC3,RFC4,RFC5,SSBP1,SSRP1,CHAF1B,DNAJA3,SUPT16H,PNKP,ORC3,SAMHD1,DNAJC2,LRWD1
20_Member	GO Biological Processes	GO:0032508	DNA duplex unwinding	-13.8246	-11.5579	20/73	1653,1654,2547,3159,4172,4173,4174,4175,4176,4361,5813,5965,5976,5982,5983,5984,5985,6742,7520,10146	DDX1,DDX3X,XRCC6,HMGA1,MCM3,MCM4,MCM5,MCM6,MCM7,MRE11,PURA,RECQL,UPF1,RFC2,RFC3,RFC4,RFC5,SSBP1,XRCC5,G3BP1
20_Member	GO Biological Processes	GO:0071103	DNA conformation change	-13.2804	-11.0415	21/87	1653,1654,2547,3159,4172,4173,4174,4175,4176,4361,5813,5965,5976,5982,5983,5984,5985,6742,7153,7520,10146	DDX1,DDX3X,XRCC6,HMGA1,MCM3,MCM4,MCM5,MCM6,MCM7,MRE11,PURA,RECQL,UPF1,RFC2,RFC3,RFC4,RFC5,SSBP1,TOP2A,XRCC5,G3BP1
20_Member	GO Biological Processes	GO:0032392	DNA geometric change	-13.1058	-10.8769	20/79	1653,1654,2547,3159,4172,4173,4174,4175,4176,4361,5813,5965,5976,5982,5983,5984,5985,6742,7520,10146	DDX1,DDX3X,XRCC6,HMGA1,MCM3,MCM4,MCM5,MCM6,MCM7,MRE11,PURA,RECQL,UPF1,RFC2,RFC3,RFC4,RFC5,SSBP1,XRCC5,G3BP1
20_Member	GO Biological Processes	GO:0006261	DNA-templated DNA replication	-12.9956	-10.7732	25/133	142,1025,3159,3978,3980,4172,4173,4174,4175,4176,4361,5424,5813,5965,5976,5982,5983,5984,5985,6742,9093,11284,23595,25939,222229	PARP1,CDK9,HMGA1,LIG1,LIG3,MCM3,MCM4,MCM5,MCM6,MCM7,MRE11,POLD1,PURA,RECQL,UPF1,RFC2,RFC3,RFC4,RFC5,SSBP1,DNAJA3,PNKP,ORC3,SAMHD1,LRWD1
20_Member	KEGG Pathway	hsa03030	DNA replication	-10.9205	-8.80407	13/36	3978,4172,4173,4174,4175,4176,5424,5982,5983,5984,5985,6742,79621	LIG1,MCM3,MCM4,MCM5,MCM6,MCM7,POLD1,RFC2,RFC3,RFC4,RFC5,SSBP1,RNASEH2B
20_Member	GO Biological Processes	GO:0051276	chromosome organization	-10.1585	-8.09006	43/477	142,983,1062,1653,1654,2547,2801,3159,3796,3837,4172,4173,4174,4175,4176,4361,4436,5591,5813,5965,5976,5982,5983,5984,5985,6742,7153,7283,7515,7520,8520,9131,9183,9918,10146,10728,11331,23122,23244,23347,23397,26073,55183	PARP1,CDK1,CENPE,DDX1,DDX3X,XRCC6,GOLGA2,HMGA1,KIF2A,KPNB1,MCM3,MCM4,MCM5,MCM6,MCM7,MRE11,MSH2,PRKDC,PURA,RECQL,UPF1,RFC2,RFC3,RFC4,RFC5,SSBP1,TOP2A,TUBG1,XRCC1,XRCC5,HAT1,AIFM1,ZW10,NCAPD2,G3BP1,PTGES3,PHB2,CLASP2,PDS5A,SMCHD1,NCAPH,POLDIP2,RIF1
20_Member	WikiPathways	WP2446	Retinoblastoma gene in cancer	-9.08344	-7.06842	17/90	983,1017,1786,2956,4172,4173,4175,4176,5591,5928,5931,5983,5984,5985,6595,7029,7153	CDK1,CDK2,DNMT1,MSH6,MCM3,MCM4,MCM6,MCM7,PRKDC,RBBP4,RBBP7,RFC3,RFC4,RFC5,SMARCA2,TFDP2,TOP2A
20_Member	Reactome Gene Sets	R-HSA-69190	DNA strand elongation	-9.06289	-7.05584	11/32	3978,4172,4173,4174,4175,4176,5424,5982,5983,5984,5985	LIG1,MCM3,MCM4,MCM5,MCM6,MCM7,POLD1,RFC2,RFC3,RFC4,RFC5
20_Member	WikiPathways	WP466	DNA replication	-8.77793	-6.79677	12/42	1017,4172,4173,4174,4175,4176,5424,5982,5983,5984,5985,23595	CDK2,MCM3,MCM4,MCM5,MCM6,MCM7,POLD1,RFC2,RFC3,RFC4,RFC5,ORC3
20_Member	GO Biological Processes	GO:0006268	DNA unwinding involved in DNA replication	-8.51638	-6.56831	9/21	3159,4172,4173,4174,4175,4176,5813,5965,6742	HMGA1,MCM3,MCM4,MCM5,MCM6,MCM7,PURA,RECQL,SSBP1
20_Member	Reactome Gene Sets	R-HSA-176187	Activation of ATR in response to replication stress	-8.29927	-6.37304	11/37	1017,4172,4173,4174,4175,4176,5982,5983,5984,5985,23595	CDK2,MCM3,MCM4,MCM5,MCM6,MCM7,RFC2,RFC3,RFC4,RFC5,ORC3
20_Member	GO Biological Processes	GO:0006302	double-strand break repair	-7.35781	-5.52422	23/207	142,1108,1653,2140,2547,3980,4172,4173,4174,4175,4176,4361,4436,5591,5965,7515,7520,9112,11284,23347,25939,27339,56916	PARP1,CHD4,DDX1,EYA3,XRCC6,LIG3,MCM3,MCM4,MCM5,MCM6,MCM7,MRE11,MSH2,PRKDC,RECQL,XRCC1,XRCC5,MTA1,PNKP,SMCHD1,SAMHD1,PRPF19,SMARCAD1
20_Member	GO Biological Processes	GO:0022616	DNA strand elongation	-7.34215	-5.50987	8/20	3978,3980,4172,4173,4176,4361,5983,5984	LIG1,LIG3,MCM3,MCM4,MCM7,MRE11,RFC3,RFC4
20_Member	GO Biological Processes	GO:0090329	regulation of DNA-templated DNA replication	-7.05672	-5.25503	12/58	1017,3980,4172,4173,4174,4175,4176,5982,5983,5984,5985,6742	CDK2,LIG3,MCM3,MCM4,MCM5,MCM6,MCM7,RFC2,RFC3,RFC4,RFC5,SSBP1
20_Member	GO Biological Processes	GO:0006271	DNA strand elongation involved in DNA replication	-7.04747	-5.24822	7/15	3978,3980,4172,4173,4176,5983,5984	LIG1,LIG3,MCM3,MCM4,MCM7,RFC3,RFC4
20_Member	CORUM	CORUM:387	MCM complex	-6.92099	-5.13143	5/6	4172,4173,4174,4175,4176	MCM3,MCM4,MCM5,MCM6,MCM7
20_Member	GO Biological Processes	GO:0006275	regulation of DNA replication	-6.32965	-4.60031	17/136	983,1017,3980,4172,4173,4174,4175,4176,5982,5983,5984,5985,6742,8467,23244,23595,26057	CDK1,CDK2,LIG3,MCM3,MCM4,MCM5,MCM6,MCM7,RFC2,RFC3,RFC4,RFC5,SSBP1,SMARCA5,PDS5A,ORC3,ANKRD17
20_Member	GO Biological Processes	GO:0006270	DNA replication initiation	-6.03958	-4.33944	8/28	4172,4173,4174,4175,4176,5813,23595,222229	MCM3,MCM4,MCM5,MCM6,MCM7,PURA,ORC3,LRWD1
20_Member	GO Biological Processes	GO:0030174	regulation of DNA-templated DNA replication initiation	-5.62603	-3.96676	6/15	1017,4172,4173,4174,4175,4176	CDK2,MCM3,MCM4,MCM5,MCM6,MCM7
20_Member	GO Biological Processes	GO:0000727	double-strand break repair via break-induced replication	-4.86378	-3.30106	5/12	4172,4173,4174,4175,4176	MCM3,MCM4,MCM5,MCM6,MCM7
20_Member	Reactome Gene Sets	R-HSA-176974	Unwinding of DNA	-4.86378	-3.30106	5/12	4172,4173,4174,4175,4176	MCM3,MCM4,MCM5,MCM6,MCM7
20_Member	GO Biological Processes	GO:0006310	DNA recombination	-4.64893	-3.119	20/237	1108,2547,2956,3329,3980,4172,4173,4174,4175,4176,4361,4436,4841,5591,5965,7153,7515,7520,9730,25939	CHD4,XRCC6,MSH6,HSPD1,LIG3,MCM3,MCM4,MCM5,MCM6,MCM7,MRE11,MSH2,NONO,PRKDC,RECQL,TOP2A,XRCC1,XRCC5,DCAF1,SAMHD1
20_Member	CORUM	CORUM:2791	MCM4-MCM6-MCM7 complex	-4.61169	-3.10082	3/3	4173,4175,4176	MCM4,MCM6,MCM7
20_Member	Reactome Gene Sets	R-HSA-68962	Activation of the pre-replicative complex	-4.42379	-2.93346	7/33	1017,4172,4173,4174,4175,4176,23595	CDK2,MCM3,MCM4,MCM5,MCM6,MCM7,ORC3
20_Member	GO Biological Processes	GO:0000725	recombinational repair	-4.39388	-2.90654	13/118	1108,2547,3980,4172,4173,4174,4175,4176,4361,5965,7515,7520,25939	CHD4,XRCC6,LIG3,MCM3,MCM4,MCM5,MCM6,MCM7,MRE11,RECQL,XRCC1,XRCC5,SAMHD1
20_Member	CORUM	CORUM:2792	MCM2-MCM4-MCM6-MCM7 complex	-4.01917	-2.5986	3/4	4173,4175,4176	MCM4,MCM6,MCM7
20_Member	GO Biological Processes	GO:1902969	mitotic DNA replication	-3.53635	-2.18644	4/12	3978,4172,4173,4175	LIG1,MCM3,MCM4,MCM6
20_Member	GO Biological Processes	GO:0000724	double-strand break repair via homologous recombination	-3.30361	-1.98996	11/114	1108,3980,4172,4173,4174,4175,4176,4361,5965,7515,25939	CHD4,LIG3,MCM3,MCM4,MCM5,MCM6,MCM7,MRE11,RECQL,XRCC1,SAMHD1
20_Member	GO Biological Processes	GO:0033260	nuclear DNA replication	-3.25998	-1.9519	5/24	3978,4172,4173,4175,5976	LIG1,MCM3,MCM4,MCM6,UPF1
20_Member	GO Biological Processes	GO:0044786	cell cycle DNA replication	-3.17351	-1.87942	5/25	3978,4172,4173,4175,5976	LIG1,MCM3,MCM4,MCM6,UPF1

## Sheet: Cluster2and3_VPM_Syn2D_high
GroupID	Category	Term	Description	LogP	Log(q-value)	InTerm_InList	Genes	Symbols
1_Summary	GO Biological Processes	GO:0006412	translation	-100	-96.3495	153/375	16,23,327,833,1615,1654,1915,1937,1938,1939,1964,1967,1968,1973,1977,1981,1982,1983,2058,2107,2193,2197,2617,2935,3376,3646,3692,3735,4141,4677,4686,5188,5610,5917,6059,6122,6124,6125,6128,6129,6130,6132,6133,6134,6135,6138,6139,6141,6142,6143,6147,6154,6156,6158,6159,6160,6161,6164,6168,6187,6188,6189,6191,6201,6202,6203,6205,6206,6207,6208,6209,6210,6217,6218,6222,6223,6224,6228,6231,6232,6238,…	AARS1,ABCF1,APEH,CARS1,DARS1,DDX3X,EEF1A1,EEF1G,EEF2,EIF2D,EIF1AX,EIF2B1,EIF2S3,EIF4A1,EIF4E,EIF4G1,EIF4G2,EIF5,EPRS1,ETF1,FARSA,FAU,GARS1,GSPT1,IARS1,EIF3E,EIF6,KARS1,MARS1,NARS1,NCBP1,GATB,EIF2AK2,RARS1,ABCE1,RPL3,RPL4,RPL5,RPL6,RPL7,RPL7A,RPL8,RPL9,RPL10,RPL11,RPL15,RPL17,RPL18,RPL18A,RPL19,RPL23A,RPL26,RPL30,RPL28,RPL29,RPL31,RPL32,RPL34,RPL37A,RPS2,RPS3,RPS3A,RPS4X,RPS7,RPS8,RPS9,RPS11,RPS12…
1_Member	GO Biological Processes	GO:0006412	translation	-100	-96.3495	153/375	16,23,327,833,1615,1654,1915,1937,1938,1939,1964,1967,1968,1973,1977,1981,1982,1983,2058,2107,2193,2197,2617,2935,3376,3646,3692,3735,4141,4677,4686,5188,5610,5917,6059,6122,6124,6125,6128,6129,6130,6132,6133,6134,6135,6138,6139,6141,6142,6143,6147,6154,6156,6158,6159,6160,6161,6164,6168,6187,6188,6189,6191,6201,6202,6203,6205,6206,6207,6208,6209,6210,6217,6218,6222,6223,6224,6228,6231,6232,6238,…	AARS1,ABCF1,APEH,CARS1,DARS1,DDX3X,EEF1A1,EEF1G,EEF2,EIF2D,EIF1AX,EIF2B1,EIF2S3,EIF4A1,EIF4E,EIF4G1,EIF4G2,EIF5,EPRS1,ETF1,FARSA,FAU,GARS1,GSPT1,IARS1,EIF3E,EIF6,KARS1,MARS1,NARS1,NCBP1,GATB,EIF2AK2,RARS1,ABCE1,RPL3,RPL4,RPL5,RPL6,RPL7,RPL7A,RPL8,RPL9,RPL10,RPL11,RPL15,RPL17,RPL18,RPL18A,RPL19,RPL23A,RPL26,RPL30,RPL28,RPL29,RPL31,RPL32,RPL34,RPL37A,RPS2,RPS3,RPS3A,RPS4X,RPS7,RPS8,RPS9,RPS11,RPS12…
1_Member	GO Biological Processes	GO:0043043	peptide biosynthetic process	-100	-96.3495	153/403	16,23,327,833,1615,1654,1915,1937,1938,1939,1964,1967,1968,1973,1977,1981,1982,1983,2058,2107,2193,2197,2617,2935,3376,3646,3692,3735,4141,4677,4686,5188,5610,5917,6059,6122,6124,6125,6128,6129,6130,6132,6133,6134,6135,6138,6139,6141,6142,6143,6147,6154,6156,6158,6159,6160,6161,6164,6168,6187,6188,6189,6191,6201,6202,6203,6205,6206,6207,6208,6209,6210,6217,6218,6222,6223,6224,6228,6231,6232,6238,…	AARS1,ABCF1,APEH,CARS1,DARS1,DDX3X,EEF1A1,EEF1G,EEF2,EIF2D,EIF1AX,EIF2B1,EIF2S3,EIF4A1,EIF4E,EIF4G1,EIF4G2,EIF5,EPRS1,ETF1,FARSA,FAU,GARS1,GSPT1,IARS1,EIF3E,EIF6,KARS1,MARS1,NARS1,NCBP1,GATB,EIF2AK2,RARS1,ABCE1,RPL3,RPL4,RPL5,RPL6,RPL7,RPL7A,RPL8,RPL9,RPL10,RPL11,RPL15,RPL17,RPL18,RPL18A,RPL19,RPL23A,RPL26,RPL30,RPL28,RPL29,RPL31,RPL32,RPL34,RPL37A,RPS2,RPS3,RPS3A,RPS4X,RPS7,RPS8,RPS9,RPS11,RPS12…
1_Member	GO Biological Processes	GO:0043604	amide biosynthetic process	-100	-96.3495	167/521	16,23,31,327,440,833,1615,1654,1738,1915,1937,1938,1939,1964,1967,1968,1973,1977,1981,1982,1983,2058,2107,2181,2182,2193,2197,2617,2629,2935,3376,3646,3692,3735,4141,4594,4677,4686,5160,5162,5188,5610,5917,6059,6122,6124,6125,6128,6129,6130,6132,6133,6134,6135,6138,6139,6141,6142,6143,6147,6154,6156,6158,6159,6160,6161,6164,6168,6187,6188,6189,6191,6201,6202,6203,6205,6206,6207,6208,6209,6210,621…	AARS1,ABCF1,ACACA,APEH,ASNS,CARS1,DARS1,DDX3X,DLD,EEF1A1,EEF1G,EEF2,EIF2D,EIF1AX,EIF2B1,EIF2S3,EIF4A1,EIF4E,EIF4G1,EIF4G2,EIF5,EPRS1,ETF1,ACSL3,ACSL4,FARSA,FAU,GARS1,GBA1,GSPT1,IARS1,EIF3E,EIF6,KARS1,MARS1,MMUT,NARS1,NCBP1,PDHA1,PDHB,GATB,EIF2AK2,RARS1,ABCE1,RPL3,RPL4,RPL5,RPL6,RPL7,RPL7A,RPL8,RPL9,RPL10,RPL11,RPL15,RPL17,RPL18,RPL18A,RPL19,RPL23A,RPL26,RPL30,RPL28,RPL29,RPL31,RPL32,RPL34,RPL37A,…
1_Member	Reactome Gene Sets	R-HSA-72766	Translation	-100	-96.3495	136/292	16,327,833,1615,1915,1937,1938,1964,1967,1968,1973,1975,1977,1981,1983,2058,2107,2193,2197,2617,2935,3376,3646,3735,4141,4677,5018,5917,6122,6124,6125,6128,6129,6130,6132,6133,6134,6135,6138,6139,6141,6142,6143,6147,6154,6156,6158,6159,6160,6161,6164,6168,6187,6188,6189,6191,6201,6202,6203,6205,6206,6207,6208,6209,6210,6217,6218,6222,6223,6224,6228,6231,6232,6301,6728,6729,6897,7284,7407,7453,745…	AARS1,APEH,CARS1,DARS1,EEF1A1,EEF1G,EEF2,EIF1AX,EIF2B1,EIF2S3,EIF4A1,EIF4B,EIF4E,EIF4G1,EIF5,EPRS1,ETF1,FARSA,FAU,GARS1,GSPT1,IARS1,EIF3E,KARS1,MARS1,NARS1,OXA1L,RARS1,RPL3,RPL4,RPL5,RPL6,RPL7,RPL7A,RPL8,RPL9,RPL10,RPL11,RPL15,RPL17,RPL18,RPL18A,RPL19,RPL23A,RPL26,RPL30,RPL28,RPL29,RPL31,RPL32,RPL34,RPL37A,RPS2,RPS3,RPS3A,RPS4X,RPS7,RPS8,RPS9,RPS11,RPS12,RPS13,RPS14,RPS15,RPS15A,RPS16,RPS17,RPS18…
1_Member	Reactome Gene Sets	R-HSA-8953854	Metabolism of RNA	-100	-96.3495	196/716	207,705,902,988,1022,1432,1477,1478,1653,1655,1656,1736,1973,1975,1977,1981,2058,2107,2197,2521,2935,3028,3185,3187,3188,3190,3312,4670,4686,4691,4904,5093,5094,5356,5430,5431,5434,5437,5518,5520,5683,5684,5685,5687,5689,5693,5694,5700,5701,5702,5704,5705,5706,5707,5708,5709,5710,5901,5976,6122,6124,6125,6128,6129,6130,6132,6133,6134,6135,6138,6139,6141,6142,6143,6147,6154,6156,6158,6159,6160,616…	AKT1,BYSL,CCNH,CDC5L,CDK7,MAPK14,CSTF1,CSTF2,DDX1,DDX5,DDX6,DKC1,EIF4A1,EIF4B,EIF4E,EIF4G1,EPRS1,ETF1,FAU,FUS,GSPT1,HSD17B10,HNRNPF,HNRNPH1,HNRNPH2,HNRNPK,HSPA8,HNRNPM,NCBP1,NCL,YBX1,PCBP1,PCBP2,PLRG1,POLR2A,POLR2B,POLR2E,POLR2H,PPP2R1A,PPP2R2A,PSMA2,PSMA3,PSMA4,PSMA6,PSMB1,PSMB5,PSMB6,PSMC1,PSMC2,PSMC3,PSMC4,PSMC5,PSMC6,PSMD1,PSMD2,PSMD3,PSMD4,RAN,UPF1,RPL3,RPL4,RPL5,RPL6,RPL7,RPL7A,RPL8,RPL9,RP…
1_Member	GO Biological Processes	GO:0006518	peptide metabolic process	-98.2249	-94.6535	163/536	16,23,327,833,1512,1514,1522,1615,1654,1915,1937,1938,1939,1964,1967,1968,1973,1977,1981,1982,1983,2058,2107,2193,2197,2617,2879,2935,2936,3376,3416,3646,3692,3735,4141,4677,4686,5188,5610,5917,6059,6122,6124,6125,6128,6129,6130,6132,6133,6134,6135,6138,6139,6141,6142,6143,6147,6154,6156,6158,6159,6160,6161,6164,6168,6187,6188,6189,6191,6201,6202,6203,6205,6206,6207,6208,6209,6210,6217,6218,6222,…	AARS1,ABCF1,APEH,CARS1,CTSH,CTSL,CTSZ,DARS1,DDX3X,EEF1A1,EEF1G,EEF2,EIF2D,EIF1AX,EIF2B1,EIF2S3,EIF4A1,EIF4E,EIF4G1,EIF4G2,EIF5,EPRS1,ETF1,FARSA,FAU,GARS1,GPX4,GSPT1,GSR,IARS1,IDE,EIF3E,EIF6,KARS1,MARS1,NARS1,NCBP1,GATB,EIF2AK2,RARS1,ABCE1,RPL3,RPL4,RPL5,RPL6,RPL7,RPL7A,RPL8,RPL9,RPL10,RPL11,RPL15,RPL17,RPL18,RPL18A,RPL19,RPL23A,RPL26,RPL30,RPL28,RPL29,RPL31,RPL32,RPL34,RPL37A,RPS2,RPS3,RPS3A,RPS4…
1_Member	GO Biological Processes	GO:0034645	cellular macromolecule biosynthetic process	-82.9509	-79.4465	175/770	16,23,34,178,207,327,833,1615,1654,1915,1937,1938,1939,1964,1967,1968,1973,1977,1981,1982,1983,2058,2107,2135,2193,2197,2617,2673,2683,2801,2935,3376,3646,3692,3735,4124,4141,4677,4686,4864,5188,5495,5610,5917,6059,6122,6124,6125,6128,6129,6130,6132,6133,6134,6135,6138,6139,6141,6142,6143,6147,6154,6156,6158,6159,6160,6161,6164,6168,6187,6188,6189,6191,6201,6202,6203,6205,6206,6207,6208,6209,6210…	AARS1,ABCF1,ACADM,AGL,AKT1,APEH,CARS1,DARS1,DDX3X,EEF1A1,EEF1G,EEF2,EIF2D,EIF1AX,EIF2B1,EIF2S3,EIF4A1,EIF4E,EIF4G1,EIF4G2,EIF5,EPRS1,ETF1,EXTL2,FARSA,FAU,GARS1,GFPT1,B4GALT1,GOLGA2,GSPT1,IARS1,EIF3E,EIF6,KARS1,MAN2A1,MARS1,NARS1,NCBP1,NPC1,GATB,PPM1B,EIF2AK2,RARS1,ABCE1,RPL3,RPL4,RPL5,RPL6,RPL7,RPL7A,RPL8,RPL9,RPL10,RPL11,RPL15,RPL17,RPL18,RPL18A,RPL19,RPL23A,RPL26,RPL30,RPL28,RPL29,RPL31,RPL32,R…
1_Member	Reactome Gene Sets	R-HSA-72613	Eukaryotic Translation Initiation	-70.6352	-67.24	73/120	1964,1967,1968,1973,1975,1977,1981,1983,2197,3646,6122,6124,6125,6128,6129,6130,6132,6133,6134,6135,6138,6139,6141,6142,6143,6147,6154,6156,6158,6159,6160,6161,6164,6168,6187,6188,6189,6191,6201,6202,6203,6205,6206,6207,6208,6209,6210,6217,6218,6222,6223,6224,6228,6231,6232,7458,8661,8662,8663,8664,8666,8667,8668,8669,8890,8891,8892,9045,9349,9669,26986,27335,51386	EIF1AX,EIF2B1,EIF2S3,EIF4A1,EIF4B,EIF4E,EIF4G1,EIF5,FAU,EIF3E,RPL3,RPL4,RPL5,RPL6,RPL7,RPL7A,RPL8,RPL9,RPL10,RPL11,RPL15,RPL17,RPL18,RPL18A,RPL19,RPL23A,RPL26,RPL30,RPL28,RPL29,RPL31,RPL32,RPL34,RPL37A,RPS2,RPS3,RPS3A,RPS4X,RPS7,RPS8,RPS9,RPS11,RPS12,RPS13,RPS14,RPS15,RPS15A,RPS16,RPS17,RPS18,RPS19,RPS20,RPS23,RPS26,RPS27,EIF4H,EIF3A,EIF3B,EIF3C,EIF3D,EIF3G,EIF3H,EIF3I,EIF3J,EIF2B4,EIF2B3,EIF2B2,…
1_Member	Reactome Gene Sets	R-HSA-72737	Cap-dependent Translation Initiation	-70.6352	-67.24	73/120	1964,1967,1968,1973,1975,1977,1981,1983,2197,3646,6122,6124,6125,6128,6129,6130,6132,6133,6134,6135,6138,6139,6141,6142,6143,6147,6154,6156,6158,6159,6160,6161,6164,6168,6187,6188,6189,6191,6201,6202,6203,6205,6206,6207,6208,6209,6210,6217,6218,6222,6223,6224,6228,6231,6232,7458,8661,8662,8663,8664,8666,8667,8668,8669,8890,8891,8892,9045,9349,9669,26986,27335,51386	EIF1AX,EIF2B1,EIF2S3,EIF4A1,EIF4B,EIF4E,EIF4G1,EIF5,FAU,EIF3E,RPL3,RPL4,RPL5,RPL6,RPL7,RPL7A,RPL8,RPL9,RPL10,RPL11,RPL15,RPL17,RPL18,RPL18A,RPL19,RPL23A,RPL26,RPL30,RPL28,RPL29,RPL31,RPL32,RPL34,RPL37A,RPS2,RPS3,RPS3A,RPS4X,RPS7,RPS8,RPS9,RPS11,RPS12,RPS13,RPS14,RPS15,RPS15A,RPS16,RPS17,RPS18,RPS19,RPS20,RPS23,RPS26,RPS27,EIF4H,EIF3A,EIF3B,EIF3C,EIF3D,EIF3G,EIF3H,EIF3I,EIF3J,EIF2B4,EIF2B3,EIF2B2,…
1_Member	Reactome Gene Sets	R-HSA-72706	GTP hydrolysis and joining of the 60S ribosomal subunit	-65.3303	-61.9809	68/113	1964,1968,1973,1975,1977,1981,1983,2197,3646,6122,6124,6125,6128,6129,6130,6132,6133,6134,6135,6138,6139,6141,6142,6143,6147,6154,6156,6158,6159,6160,6161,6164,6168,6187,6188,6189,6191,6201,6202,6203,6205,6206,6207,6208,6209,6210,6217,6218,6222,6223,6224,6228,6231,6232,7458,8661,8662,8663,8664,8666,8667,8668,8669,9045,9349,9669,27335,51386	EIF1AX,EIF2S3,EIF4A1,EIF4B,EIF4E,EIF4G1,EIF5,FAU,EIF3E,RPL3,RPL4,RPL5,RPL6,RPL7,RPL7A,RPL8,RPL9,RPL10,RPL11,RPL15,RPL17,RPL18,RPL18A,RPL19,RPL23A,RPL26,RPL30,RPL28,RPL29,RPL31,RPL32,RPL34,RPL37A,RPS2,RPS3,RPS3A,RPS4X,RPS7,RPS8,RPS9,RPS11,RPS12,RPS13,RPS14,RPS15,RPS15A,RPS16,RPS17,RPS18,RPS19,RPS20,RPS23,RPS26,RPS27,EIF4H,EIF3A,EIF3B,EIF3C,EIF3D,EIF3G,EIF3H,EIF3I,EIF3J,RPL14,RPL23,EIF5B,EIF3K,EIF3L
1_Member	GO Biological Processes	GO:0002181	cytoplasmic translation	-64.823	-61.515	70/123	1939,1968,1973,1981,1983,2107,2197,3646,4686,6122,6124,6125,6128,6129,6130,6132,6133,6134,6135,6138,6139,6141,6142,6143,6147,6154,6156,6158,6159,6160,6161,6164,6168,6187,6188,6189,6191,6201,6202,6203,6205,6206,6207,6208,6209,6210,6217,6218,6222,6223,6224,6228,6231,6232,6301,8661,8662,8663,8664,8666,8667,8668,8669,8891,9045,9349,10399,27335,28985,51386	EIF2D,EIF2S3,EIF4A1,EIF4G1,EIF5,ETF1,FAU,EIF3E,NCBP1,RPL3,RPL4,RPL5,RPL6,RPL7,RPL7A,RPL8,RPL9,RPL10,RPL11,RPL15,RPL17,RPL18,RPL18A,RPL19,RPL23A,RPL26,RPL30,RPL28,RPL29,RPL31,RPL32,RPL34,RPL37A,RPS2,RPS3,RPS3A,RPS4X,RPS7,RPS8,RPS9,RPS11,RPS12,RPS13,RPS14,RPS15,RPS15A,RPS16,RPS17,RPS18,RPS19,RPS20,RPS23,RPS26,RPS27,SARS1,EIF3A,EIF3B,EIF3C,EIF3D,EIF3G,EIF3H,EIF3I,EIF3J,EIF2B3,RPL14,RPL23,RACK1,EIF3K…
1_Member	Reactome Gene Sets	R-HSA-156827	L13a-mediated translational silencing of Ceruloplasmin expression	-64.1203	-60.85	67/112	1964,1968,1973,1975,1977,1981,2197,3646,6122,6124,6125,6128,6129,6130,6132,6133,6134,6135,6138,6139,6141,6142,6143,6147,6154,6156,6158,6159,6160,6161,6164,6168,6187,6188,6189,6191,6201,6202,6203,6205,6206,6207,6208,6209,6210,6217,6218,6222,6223,6224,6228,6231,6232,7458,8661,8662,8663,8664,8666,8667,8668,8669,9045,9349,26986,27335,51386	EIF1AX,EIF2S3,EIF4A1,EIF4B,EIF4E,EIF4G1,FAU,EIF3E,RPL3,RPL4,RPL5,RPL6,RPL7,RPL7A,RPL8,RPL9,RPL10,RPL11,RPL15,RPL17,RPL18,RPL18A,RPL19,RPL23A,RPL26,RPL30,RPL28,RPL29,RPL31,RPL32,RPL34,RPL37A,RPS2,RPS3,RPS3A,RPS4X,RPS7,RPS8,RPS9,RPS11,RPS12,RPS13,RPS14,RPS15,RPS15A,RPS16,RPS17,RPS18,RPS19,RPS20,RPS23,RPS26,RPS27,EIF4H,EIF3A,EIF3B,EIF3C,EIF3D,EIF3G,EIF3H,EIF3I,EIF3J,RPL14,RPL23,PABPC1,EIF3K,EIF3L
1_Member	Reactome Gene Sets	R-HSA-71291	Metabolism of amino acids and derivatives	-59.616	-56.3805	106/376	440,593,594,1159,1468,1491,1615,1738,2058,2184,2197,2744,2805,2806,2936,3028,3376,3735,4141,4967,5160,5162,5683,5684,5685,5687,5689,5693,5694,5700,5701,5702,5704,5705,5706,5707,5708,5709,5710,5723,5831,5832,5917,6122,6124,6125,6128,6129,6130,6132,6133,6134,6135,6138,6139,6141,6142,6143,6147,6154,6156,6158,6159,6160,6161,6164,6168,6187,6188,6189,6191,6201,6202,6203,6205,6206,6207,6208,6209,6210,62…	ASNS,BCKDHA,BCKDHB,CKMT1B,SLC25A10,CTH,DARS1,DLD,EPRS1,FAH,FAU,GLS,GOT1,GOT2,GSR,HSD17B10,IARS1,KARS1,MARS1,OGDH,PDHA1,PDHB,PSMA2,PSMA3,PSMA4,PSMA6,PSMB1,PSMB5,PSMB6,PSMC1,PSMC2,PSMC3,PSMC4,PSMC5,PSMC6,PSMD1,PSMD2,PSMD3,PSMD4,PSPH,PYCR1,ALDH18A1,RARS1,RPL3,RPL4,RPL5,RPL6,RPL7,RPL7A,RPL8,RPL9,RPL10,RPL11,RPL15,RPL17,RPL18,RPL18A,RPL19,RPL23A,RPL26,RPL30,RPL28,RPL29,RPL31,RPL32,RPL34,RPL37A,RPS2,RP…
1_Member	Reactome Gene Sets	R-HSA-2262752	Cellular responses to stress	-58.8559	-55.6525	149/789	118,207,440,526,1017,1327,1432,1459,1460,1781,1915,1968,2135,2197,2475,2673,2932,2936,3159,3162,3301,3312,3313,3320,3326,4343,4361,4513,4790,4802,5469,5606,5611,5683,5684,5685,5687,5689,5693,5694,5700,5701,5702,5704,5705,5706,5707,5708,5709,5710,5928,5931,6122,6124,6125,6128,6129,6130,6132,6133,6134,6135,6138,6139,6141,6142,6143,6147,6154,6156,6158,6159,6160,6161,6164,6168,6187,6188,6189,6191,620…	ADD1,AKT1,ASNS,ATP6V1B2,CDK2,COX4I1,MAPK14,CSNK2A2,CSNK2B,DYNC1I2,EEF1A1,EIF2S3,EXTL2,FAU,MTOR,GFPT1,GSK3B,GSR,HMGA1,HMOX1,DNAJA1,HSPA8,HSPA9,HSP90AA1,HSP90AB1,MOV10,MRE11,COX2,NFKB1,NFYC,MED1,MAP2K3,DNAJC3,PSMA2,PSMA3,PSMA4,PSMA6,PSMB1,PSMB5,PSMB6,PSMC1,PSMC2,PSMC3,PSMC4,PSMC5,PSMC6,PSMD1,PSMD2,PSMD3,PSMD4,RBBP4,RBBP7,RPL3,RPL4,RPL5,RPL6,RPL7,RPL7A,RPL8,RPL9,RPL10,RPL11,RPL15,RPL17,RPL18,RPL18A,…
1_Member	Reactome Gene Sets	R-HSA-72689	Formation of a pool of free 40S subunits	-56.808	-53.6346	60/102	1964,2197,3646,6122,6124,6125,6128,6129,6130,6132,6133,6134,6135,6138,6139,6141,6142,6143,6147,6154,6156,6158,6159,6160,6161,6164,6168,6187,6188,6189,6191,6201,6202,6203,6205,6206,6207,6208,6209,6210,6217,6218,6222,6223,6224,6228,6231,6232,8661,8662,8663,8664,8666,8667,8668,8669,9045,9349,27335,51386	EIF1AX,FAU,EIF3E,RPL3,RPL4,RPL5,RPL6,RPL7,RPL7A,RPL8,RPL9,RPL10,RPL11,RPL15,RPL17,RPL18,RPL18A,RPL19,RPL23A,RPL26,RPL30,RPL28,RPL29,RPL31,RPL32,RPL34,RPL37A,RPS2,RPS3,RPS3A,RPS4X,RPS7,RPS8,RPS9,RPS11,RPS12,RPS13,RPS14,RPS15,RPS15A,RPS16,RPS17,RPS18,RPS19,RPS20,RPS23,RPS26,RPS27,EIF3A,EIF3B,EIF3C,EIF3D,EIF3G,EIF3H,EIF3I,EIF3J,RPL14,RPL23,EIF3K,EIF3L
1_Member	Reactome Gene Sets	R-HSA-168255	Influenza Infection	-56.4071	-53.2617	71/157	142,293,2197,2926,3320,3836,3837,3838,3839,3840,3843,5430,5431,5434,5437,5610,5611,5901,6122,6124,6125,6128,6129,6130,6132,6133,6134,6135,6138,6139,6141,6142,6143,6147,6154,6156,6158,6159,6160,6161,6164,6168,6187,6188,6189,6191,6201,6202,6203,6205,6206,6207,6208,6209,6210,6217,6218,6222,6223,6224,6228,6231,6232,7514,9045,9349,9818,9972,10762,55746,57122	PARP1,SLC25A6,FAU,GRSF1,HSP90AA1,KPNA1,KPNB1,KPNA2,KPNA3,KPNA4,IPO5,POLR2A,POLR2B,POLR2E,POLR2H,EIF2AK2,DNAJC3,RAN,RPL3,RPL4,RPL5,RPL6,RPL7,RPL7A,RPL8,RPL9,RPL10,RPL11,RPL15,RPL17,RPL18,RPL18A,RPL19,RPL23A,RPL26,RPL30,RPL28,RPL29,RPL31,RPL32,RPL34,RPL37A,RPS2,RPS3,RPS3A,RPS4X,RPS7,RPS8,RPS9,RPS11,RPS12,RPS13,RPS14,RPS15,RPS15A,RPS16,RPS17,RPS18,RPS19,RPS20,RPS23,RPS26,RPS27,XPO1,RPL14,RPL23,NUP58…
1_Member	Reactome Gene Sets	R-HSA-72312	rRNA processing	-56.1613	-53.0423	79/205	705,1736,2197,3028,4691,6122,6124,6125,6128,6129,6130,6132,6133,6134,6135,6138,6139,6141,6142,6143,6147,6154,6156,6158,6159,6160,6161,6164,6168,6187,6188,6189,6191,6201,6202,6203,6205,6206,6207,6208,6209,6210,6217,6218,6222,6223,6224,6228,6231,6232,9045,9188,9349,9692,10436,10528,10799,10813,11340,22803,22894,23160,23246,23404,23481,23517,51106,51602,54931,55127,55651,55759,55781,56902,60528,7905…	BYSL,DKC1,FAU,HSD17B10,NCL,RPL3,RPL4,RPL5,RPL6,RPL7,RPL7A,RPL8,RPL9,RPL10,RPL11,RPL15,RPL17,RPL18,RPL18A,RPL19,RPL23A,RPL26,RPL30,RPL28,RPL29,RPL31,RPL32,RPL34,RPL37A,RPS2,RPS3,RPS3A,RPS4X,RPS7,RPS8,RPS9,RPS11,RPS12,RPS13,RPS14,RPS15,RPS15A,RPS16,RPS17,RPS18,RPS19,RPS20,RPS23,RPS26,RPS27,RPL14,DDX21,RPL23,PRORP,EMG1,NOP56,RPP40,UTP14A,EXOSC8,XRN2,DIS3,WDR43,BOP1,EXOSC2,PES1,MTREX,TFB1M,NOP58,TRMT…
1_Member	Reactome Gene Sets	R-HSA-9010553	Regulation of expression of SLITs and ROBOs	-55.5268	-52.4326	73/172	1981,2107,2197,2935,4686,5683,5684,5685,5687,5689,5693,5694,5700,5701,5702,5704,5705,5706,5707,5708,5709,5710,6122,6124,6125,6128,6129,6130,6132,6133,6134,6135,6138,6139,6141,6142,6143,6147,6154,6156,6158,6159,6160,6161,6164,6168,6187,6188,6189,6191,6201,6202,6203,6205,6206,6207,6208,6209,6210,6217,6218,6222,6223,6224,6228,6231,6232,9045,9349,10197,23198,23708,26986	EIF4G1,ETF1,FAU,GSPT1,NCBP1,PSMA2,PSMA3,PSMA4,PSMA6,PSMB1,PSMB5,PSMB6,PSMC1,PSMC2,PSMC3,PSMC4,PSMC5,PSMC6,PSMD1,PSMD2,PSMD3,PSMD4,RPL3,RPL4,RPL5,RPL6,RPL7,RPL7A,RPL8,RPL9,RPL10,RPL11,RPL15,RPL17,RPL18,RPL18A,RPL19,RPL23A,RPL26,RPL30,RPL28,RPL29,RPL31,RPL32,RPL34,RPL37A,RPS2,RPS3,RPS3A,RPS4X,RPS7,RPS8,RPS9,RPS11,RPS12,RPS13,RPS14,RPS15,RPS15A,RPS16,RPS17,RPS18,RPS19,RPS20,RPS23,RPS26,RPS27,RPL14,R…
1_Member	CORUM	CORUM:3055	Nop56p-associated pre-rRNA complex	-54.5511	-51.5027	59/104	292,1915,1938,4670,4673,4691,4904,6122,6124,6125,6128,6129,6130,6132,6133,6134,6135,6138,6139,6141,6142,6143,6147,6154,6156,6158,6159,6160,6161,6168,6187,6189,6201,6202,6203,6205,6206,6207,6208,6209,6210,6217,6218,6222,6228,7284,7307,9045,9188,9221,9349,10514,10528,10642,11338,26156,51602,55299,55681	SLC25A5,EEF1A1,EEF2,HNRNPM,NAP1L1,NCL,YBX1,RPL3,RPL4,RPL5,RPL6,RPL7,RPL7A,RPL8,RPL9,RPL10,RPL11,RPL15,RPL17,RPL18,RPL18A,RPL19,RPL23A,RPL26,RPL30,RPL28,RPL29,RPL31,RPL32,RPL37A,RPS2,RPS3A,RPS7,RPS8,RPS9,RPS11,RPS12,RPS13,RPS14,RPS15,RPS15A,RPS16,RPS17,RPS18,RPS23,TUFM,U2AF1,RPL14,DDX21,NOLC1,RPL23,MYBBP1A,NOP56,IGF2BP1,U2AF2,RSL1D1,NOP58,BRIX1,SCYL2
1_Member	Reactome Gene Sets	R-HSA-2408522	Selenoamino acid metabolism	-52.7414	-49.7141	61/119	1491,1615,2058,2197,2936,3376,3735,4141,5917,6122,6124,6125,6128,6129,6130,6132,6133,6134,6135,6138,6139,6141,6142,6143,6147,6154,6156,6158,6159,6160,6161,6164,6168,6187,6188,6189,6191,6201,6202,6203,6205,6206,6207,6208,6209,6210,6217,6218,6222,6223,6224,6228,6231,6232,6301,7296,9045,9255,9349,22928,51520	CTH,DARS1,EPRS1,FAU,GSR,IARS1,KARS1,MARS1,RARS1,RPL3,RPL4,RPL5,RPL6,RPL7,RPL7A,RPL8,RPL9,RPL10,RPL11,RPL15,RPL17,RPL18,RPL18A,RPL19,RPL23A,RPL26,RPL30,RPL28,RPL29,RPL31,RPL32,RPL34,RPL37A,RPS2,RPS3,RPS3A,RPS4X,RPS7,RPS8,RPS9,RPS11,RPS12,RPS13,RPS14,RPS15,RPS15A,RPS16,RPS17,RPS18,RPS19,RPS20,RPS23,RPS26,RPS27,SARS1,TXNRD1,RPL14,AIMP1,RPL23,SEPHS2,LARS1
1_Member	Reactome Gene Sets	R-HSA-8868773	rRNA processing in the nucleus and cytosol	-52.0369	-49.0299	74/195	705,1736,2197,4691,6122,6124,6125,6128,6129,6130,6132,6133,6134,6135,6138,6139,6141,6142,6143,6147,6154,6156,6158,6159,6160,6161,6164,6168,6187,6188,6189,6191,6201,6202,6203,6205,6206,6207,6208,6209,6210,6217,6218,6222,6223,6224,6228,6231,6232,9045,9188,9349,10436,10528,10799,10813,11340,22803,22894,23160,23246,23404,23481,23517,51602,55127,55651,55759,55781,56902,79050,84128,84916,134430	BYSL,DKC1,FAU,NCL,RPL3,RPL4,RPL5,RPL6,RPL7,RPL7A,RPL8,RPL9,RPL10,RPL11,RPL15,RPL17,RPL18,RPL18A,RPL19,RPL23A,RPL26,RPL30,RPL28,RPL29,RPL31,RPL32,RPL34,RPL37A,RPS2,RPS3,RPS3A,RPS4X,RPS7,RPS8,RPS9,RPS11,RPS12,RPS13,RPS14,RPS15,RPS15A,RPS16,RPS17,RPS18,RPS19,RPS20,RPS23,RPS26,RPS27,RPL14,DDX21,RPL23,EMG1,NOP56,RPP40,UTP14A,EXOSC8,XRN2,DIS3,WDR43,BOP1,EXOSC2,PES1,MTREX,NOP58,HEATR1,NHP2,WDR12,RIOK2,P…
1_Member	Reactome Gene Sets	R-HSA-6791226	Major pathway of rRNA processing in the nucleolus and cytosol	-51.5503	-48.5625	72/185	705,2197,4691,6122,6124,6125,6128,6129,6130,6132,6133,6134,6135,6138,6139,6141,6142,6143,6147,6154,6156,6158,6159,6160,6161,6164,6168,6187,6188,6189,6191,6201,6202,6203,6205,6206,6207,6208,6209,6210,6217,6218,6222,6223,6224,6228,6231,6232,9045,9188,9349,10436,10528,10799,10813,11340,22803,22894,23160,23246,23404,23481,23517,51602,55127,55759,55781,56902,79050,84128,84916,134430	BYSL,FAU,NCL,RPL3,RPL4,RPL5,RPL6,RPL7,RPL7A,RPL8,RPL9,RPL10,RPL11,RPL15,RPL17,RPL18,RPL18A,RPL19,RPL23A,RPL26,RPL30,RPL28,RPL29,RPL31,RPL32,RPL34,RPL37A,RPS2,RPS3,RPS3A,RPS4X,RPS7,RPS8,RPS9,RPS11,RPS12,RPS13,RPS14,RPS15,RPS15A,RPS16,RPS17,RPS18,RPS19,RPS20,RPS23,RPS26,RPS27,RPL14,DDX21,RPL23,EMG1,NOP56,RPP40,UTP14A,EXOSC8,XRN2,DIS3,WDR43,BOP1,EXOSC2,PES1,MTREX,NOP58,HEATR1,WDR12,RIOK2,PNO1,NOC4L,…
1_Member	Reactome Gene Sets	R-HSA-975956	Nonsense Mediated Decay (NMD) independent of the Exon Junction Complex (EJC)	-51.2035	-48.2342	55/96	1981,2107,2197,2935,4686,5976,6122,6124,6125,6128,6129,6130,6132,6133,6134,6135,6138,6139,6141,6142,6143,6147,6154,6156,6158,6159,6160,6161,6164,6168,6187,6188,6189,6191,6201,6202,6203,6205,6206,6207,6208,6209,6210,6217,6218,6222,6223,6224,6228,6231,6232,9045,9349,23708,26986	EIF4G1,ETF1,FAU,GSPT1,NCBP1,UPF1,RPL3,RPL4,RPL5,RPL6,RPL7,RPL7A,RPL8,RPL9,RPL10,RPL11,RPL15,RPL17,RPL18,RPL18A,RPL19,RPL23A,RPL26,RPL30,RPL28,RPL29,RPL31,RPL32,RPL34,RPL37A,RPS2,RPS3,RPS3A,RPS4X,RPS7,RPS8,RPS9,RPS11,RPS12,RPS13,RPS14,RPS15,RPS15A,RPS16,RPS17,RPS18,RPS19,RPS20,RPS23,RPS26,RPS27,RPL14,RPL23,GSPT2,PABPC1
1_Member	Reactome Gene Sets	R-HSA-376176	Signaling by ROBO receptors	-50.0875	-47.136	76/219	998,1981,2107,2197,2935,4686,5683,5684,5685,5687,5689,5693,5694,5700,5701,5702,5704,5705,5706,5707,5708,5709,5710,6122,6124,6125,6128,6129,6130,6132,6133,6134,6135,6138,6139,6141,6142,6143,6147,6154,6156,6158,6159,6160,6161,6164,6168,6187,6188,6189,6191,6201,6202,6203,6205,6206,6207,6208,6209,6210,6217,6218,6222,6223,6224,6228,6231,6232,6714,9045,9349,10197,23122,23198,23708,26986	CDC42,EIF4G1,ETF1,FAU,GSPT1,NCBP1,PSMA2,PSMA3,PSMA4,PSMA6,PSMB1,PSMB5,PSMB6,PSMC1,PSMC2,PSMC3,PSMC4,PSMC5,PSMC6,PSMD1,PSMD2,PSMD3,PSMD4,RPL3,RPL4,RPL5,RPL6,RPL7,RPL7A,RPL8,RPL9,RPL10,RPL11,RPL15,RPL17,RPL18,RPL18A,RPL19,RPL23A,RPL26,RPL30,RPL28,RPL29,RPL31,RPL32,RPL34,RPL37A,RPS2,RPS3,RPS3A,RPS4X,RPS7,RPS8,RPS9,RPS11,RPS12,RPS13,RPS14,RPS15,RPS15A,RPS16,RPS17,RPS18,RPS19,RPS20,RPS23,RPS26,RPS27,S…
1_Member	Reactome Gene Sets	R-HSA-168273	Influenza Viral RNA Transcription and Replication	-49.553	-46.6185	62/136	142,2197,2926,3320,3843,5430,5431,5434,5437,5611,6122,6124,6125,6128,6129,6130,6132,6133,6134,6135,6138,6139,6141,6142,6143,6147,6154,6156,6158,6159,6160,6161,6164,6168,6187,6188,6189,6191,6201,6202,6203,6205,6206,6207,6208,6209,6210,6217,6218,6222,6223,6224,6228,6231,6232,9045,9349,9818,9972,10762,55746,57122	PARP1,FAU,GRSF1,HSP90AA1,IPO5,POLR2A,POLR2B,POLR2E,POLR2H,DNAJC3,RPL3,RPL4,RPL5,RPL6,RPL7,RPL7A,RPL8,RPL9,RPL10,RPL11,RPL15,RPL17,RPL18,RPL18A,RPL19,RPL23A,RPL26,RPL30,RPL28,RPL29,RPL31,RPL32,RPL34,RPL37A,RPS2,RPS3,RPS3A,RPS4X,RPS7,RPS8,RPS9,RPS11,RPS12,RPS13,RPS14,RPS15,RPS15A,RPS16,RPS17,RPS18,RPS19,RPS20,RPS23,RPS26,RPS27,RPL14,RPL23,NUP58,NUP153,NUP50,NUP133,NUP107
1_Member	Reactome Gene Sets	R-HSA-927802	Nonsense-Mediated Decay (NMD)	-49.3399	-46.4376	58/116	1981,2107,2197,2935,4686,5518,5520,5976,6122,6124,6125,6128,6129,6130,6132,6133,6134,6135,6138,6139,6141,6142,6143,6147,6154,6156,6158,6159,6160,6161,6164,6168,6187,6188,6189,6191,6201,6202,6203,6205,6206,6207,6208,6209,6210,6217,6218,6222,6223,6224,6228,6231,6232,9045,9349,23708,26986,55802	EIF4G1,ETF1,FAU,GSPT1,NCBP1,PPP2R1A,PPP2R2A,UPF1,RPL3,RPL4,RPL5,RPL6,RPL7,RPL7A,RPL8,RPL9,RPL10,RPL11,RPL15,RPL17,RPL18,RPL18A,RPL19,RPL23A,RPL26,RPL30,RPL28,RPL29,RPL31,RPL32,RPL34,RPL37A,RPS2,RPS3,RPS3A,RPS4X,RPS7,RPS8,RPS9,RPS11,RPS12,RPS13,RPS14,RPS15,RPS15A,RPS16,RPS17,RPS18,RPS19,RPS20,RPS23,RPS26,RPS27,RPL14,RPL23,GSPT2,PABPC1,DCP1A
1_Member	Reactome Gene Sets	R-HSA-975957	Nonsense Mediated Decay (NMD) enhanced by the Exon Junction Complex (EJC)	-49.3399	-46.4376	58/116	1981,2107,2197,2935,4686,5518,5520,5976,6122,6124,6125,6128,6129,6130,6132,6133,6134,6135,6138,6139,6141,6142,6143,6147,6154,6156,6158,6159,6160,6161,6164,6168,6187,6188,6189,6191,6201,6202,6203,6205,6206,6207,6208,6209,6210,6217,6218,6222,6223,6224,6228,6231,6232,9045,9349,23708,26986,55802	EIF4G1,ETF1,FAU,GSPT1,NCBP1,PPP2R1A,PPP2R2A,UPF1,RPL3,RPL4,RPL5,RPL6,RPL7,RPL7A,RPL8,RPL9,RPL10,RPL11,RPL15,RPL17,RPL18,RPL18A,RPL19,RPL23A,RPL26,RPL30,RPL28,RPL29,RPL31,RPL32,RPL34,RPL37A,RPS2,RPS3,RPS3A,RPS4X,RPS7,RPS8,RPS9,RPS11,RPS12,RPS13,RPS14,RPS15,RPS15A,RPS16,RPS17,RPS18,RPS19,RPS20,RPS23,RPS26,RPS27,RPL14,RPL23,GSPT2,PABPC1,DCP1A
1_Member	Reactome Gene Sets	R-HSA-72764	Eukaryotic Translation Termination	-47.3293	-44.4422	52/94	327,2107,2197,2935,6122,6124,6125,6128,6129,6130,6132,6133,6134,6135,6138,6139,6141,6142,6143,6147,6154,6156,6158,6159,6160,6161,6164,6168,6187,6188,6189,6191,6201,6202,6203,6205,6206,6207,6208,6209,6210,6217,6218,6222,6223,6224,6228,6231,6232,9045,9349,23708	APEH,ETF1,FAU,GSPT1,RPL3,RPL4,RPL5,RPL6,RPL7,RPL7A,RPL8,RPL9,RPL10,RPL11,RPL15,RPL17,RPL18,RPL18A,RPL19,RPL23A,RPL26,RPL30,RPL28,RPL29,RPL31,RPL32,RPL34,RPL37A,RPS2,RPS3,RPS3A,RPS4X,RPS7,RPS8,RPS9,RPS11,RPS12,RPS13,RPS14,RPS15,RPS15A,RPS16,RPS17,RPS18,RPS19,RPS20,RPS23,RPS26,RPS27,RPL14,RPL23,GSPT2
1_Member	CORUM	CORUM:306	Ribosome, cytoplasmic	-46.1101	-43.2378	48/80	2197,6122,6124,6125,6128,6129,6130,6132,6133,6134,6135,6138,6139,6141,6142,6143,6147,6154,6156,6158,6159,6160,6161,6164,6168,6187,6188,6189,6191,6201,6202,6203,6205,6206,6207,6208,6209,6210,6217,6218,6222,6223,6224,6228,6231,6232,9045,9349	FAU,RPL3,RPL4,RPL5,RPL6,RPL7,RPL7A,RPL8,RPL9,RPL10,RPL11,RPL15,RPL17,RPL18,RPL18A,RPL19,RPL23A,RPL26,RPL30,RPL28,RPL29,RPL31,RPL32,RPL34,RPL37A,RPS2,RPS3,RPS3A,RPS4X,RPS7,RPS8,RPS9,RPS11,RPS12,RPS13,RPS14,RPS15,RPS15A,RPS16,RPS17,RPS18,RPS19,RPS20,RPS23,RPS26,RPS27,RPL14,RPL23
1_Member	Reactome Gene Sets	R-HSA-156842	Eukaryotic Translation Elongation	-45.8382	-42.9801	51/94	1915,1937,1938,2197,6122,6124,6125,6128,6129,6130,6132,6133,6134,6135,6138,6139,6141,6142,6143,6147,6154,6156,6158,6159,6160,6161,6164,6168,6187,6188,6189,6191,6201,6202,6203,6205,6206,6207,6208,6209,6210,6217,6218,6222,6223,6224,6228,6231,6232,9045,9349	EEF1A1,EEF1G,EEF2,FAU,RPL3,RPL4,RPL5,RPL6,RPL7,RPL7A,RPL8,RPL9,RPL10,RPL11,RPL15,RPL17,RPL18,RPL18A,RPL19,RPL23A,RPL26,RPL30,RPL28,RPL29,RPL31,RPL32,RPL34,RPL37A,RPS2,RPS3,RPS3A,RPS4X,RPS7,RPS8,RPS9,RPS11,RPS12,RPS13,RPS14,RPS15,RPS15A,RPS16,RPS17,RPS18,RPS19,RPS20,RPS23,RPS26,RPS27,RPL14,RPL23
1_Member	Reactome Gene Sets	R-HSA-156902	Peptide chain elongation	-45.6522	-42.8212	50/90	1915,1938,2197,6122,6124,6125,6128,6129,6130,6132,6133,6134,6135,6138,6139,6141,6142,6143,6147,6154,6156,6158,6159,6160,6161,6164,6168,6187,6188,6189,6191,6201,6202,6203,6205,6206,6207,6208,6209,6210,6217,6218,6222,6223,6224,6228,6231,6232,9045,9349	EEF1A1,EEF2,FAU,RPL3,RPL4,RPL5,RPL6,RPL7,RPL7A,RPL8,RPL9,RPL10,RPL11,RPL15,RPL17,RPL18,RPL18A,RPL19,RPL23A,RPL26,RPL30,RPL28,RPL29,RPL31,RPL32,RPL34,RPL37A,RPS2,RPS3,RPS3A,RPS4X,RPS7,RPS8,RPS9,RPS11,RPS12,RPS13,RPS14,RPS15,RPS15A,RPS16,RPS17,RPS18,RPS19,RPS20,RPS23,RPS26,RPS27,RPL14,RPL23
1_Member	Reactome Gene Sets	R-HSA-192823	Viral mRNA Translation	-45.6522	-42.8212	50/90	2197,2926,5611,6122,6124,6125,6128,6129,6130,6132,6133,6134,6135,6138,6139,6141,6142,6143,6147,6154,6156,6158,6159,6160,6161,6164,6168,6187,6188,6189,6191,6201,6202,6203,6205,6206,6207,6208,6209,6210,6217,6218,6222,6223,6224,6228,6231,6232,9045,9349	FAU,GRSF1,DNAJC3,RPL3,RPL4,RPL5,RPL6,RPL7,RPL7A,RPL8,RPL9,RPL10,RPL11,RPL15,RPL17,RPL18,RPL18A,RPL19,RPL23A,RPL26,RPL30,RPL28,RPL29,RPL31,RPL32,RPL34,RPL37A,RPS2,RPS3,RPS3A,RPS4X,RPS7,RPS8,RPS9,RPS11,RPS12,RPS13,RPS14,RPS15,RPS15A,RPS16,RPS17,RPS18,RPS19,RPS20,RPS23,RPS26,RPS27,RPL14,RPL23
1_Member	Reactome Gene Sets	R-HSA-9633012	Response of EIF2AK4 (GCN2) to amino acid deficiency	-44.8486	-42.0432	52/102	440,1968,2197,6122,6124,6125,6128,6129,6130,6132,6133,6134,6135,6138,6139,6141,6142,6143,6147,6154,6156,6158,6159,6160,6161,6164,6168,6187,6188,6189,6191,6201,6202,6203,6205,6206,6207,6208,6209,6210,6217,6218,6222,6223,6224,6228,6231,6232,9045,9349,10985,440275	ASNS,EIF2S3,FAU,RPL3,RPL4,RPL5,RPL6,RPL7,RPL7A,RPL8,RPL9,RPL10,RPL11,RPL15,RPL17,RPL18,RPL18A,RPL19,RPL23A,RPL26,RPL30,RPL28,RPL29,RPL31,RPL32,RPL34,RPL37A,RPS2,RPS3,RPS3A,RPS4X,RPS7,RPS8,RPS9,RPS11,RPS12,RPS13,RPS14,RPS15,RPS15A,RPS16,RPS17,RPS18,RPS19,RPS20,RPS23,RPS26,RPS27,RPL14,RPL23,GCN1,EIF2AK4
1_Member	WikiPathways	WP477	Cytoplasmic ribosomal proteins	-44.8143	-42.0211	49/88	2197,6122,6124,6125,6128,6129,6130,6132,6133,6134,6135,6138,6139,6141,6142,6143,6147,6154,6156,6158,6159,6160,6161,6164,6168,6187,6188,6189,6191,6201,6202,6203,6205,6206,6207,6208,6209,6210,6217,6218,6222,6223,6224,6228,6231,6232,9045,9349,9801	FAU,RPL3,RPL4,RPL5,RPL6,RPL7,RPL7A,RPL8,RPL9,RPL10,RPL11,RPL15,RPL17,RPL18,RPL18A,RPL19,RPL23A,RPL26,RPL30,RPL28,RPL29,RPL31,RPL32,RPL34,RPL37A,RPS2,RPS3,RPS3A,RPS4X,RPS7,RPS8,RPS9,RPS11,RPS12,RPS13,RPS14,RPS15,RPS15A,RPS16,RPS17,RPS18,RPS19,RPS20,RPS23,RPS26,RPS27,RPL14,RPL23,MRPL19
1_Member	Reactome Gene Sets	R-HSA-2408557	Selenocysteine synthesis	-44.366	-41.5847	50/94	2197,6122,6124,6125,6128,6129,6130,6132,6133,6134,6135,6138,6139,6141,6142,6143,6147,6154,6156,6158,6159,6160,6161,6164,6168,6187,6188,6189,6191,6201,6202,6203,6205,6206,6207,6208,6209,6210,6217,6218,6222,6223,6224,6228,6231,6232,6301,9045,9349,22928	FAU,RPL3,RPL4,RPL5,RPL6,RPL7,RPL7A,RPL8,RPL9,RPL10,RPL11,RPL15,RPL17,RPL18,RPL18A,RPL19,RPL23A,RPL26,RPL30,RPL28,RPL29,RPL31,RPL32,RPL34,RPL37A,RPS2,RPS3,RPS3A,RPS4X,RPS7,RPS8,RPS9,RPS11,RPS12,RPS13,RPS14,RPS15,RPS15A,RPS16,RPS17,RPS18,RPS19,RPS20,RPS23,RPS26,RPS27,SARS1,RPL14,RPL23,SEPHS2
1_Member	Reactome Gene Sets	R-HSA-72649	Translation initiation complex formation	-43.4534	-40.695	41/59	1964,1968,1973,1975,1977,1981,2197,3646,6187,6188,6189,6191,6201,6202,6203,6205,6206,6207,6208,6209,6210,6217,6218,6222,6223,6224,6228,6231,6232,7458,8661,8662,8663,8664,8666,8667,8668,8669,26986,27335,51386	EIF1AX,EIF2S3,EIF4A1,EIF4B,EIF4E,EIF4G1,FAU,EIF3E,RPS2,RPS3,RPS3A,RPS4X,RPS7,RPS8,RPS9,RPS11,RPS12,RPS13,RPS14,RPS15,RPS15A,RPS16,RPS17,RPS18,RPS19,RPS20,RPS23,RPS26,RPS27,EIF4H,EIF3A,EIF3B,EIF3C,EIF3D,EIF3G,EIF3H,EIF3I,EIF3J,PABPC1,EIF3K,EIF3L
1_Member	Reactome Gene Sets	R-HSA-72702	Ribosomal scanning and start codon recognition	-43.4534	-40.695	41/59	1964,1968,1973,1975,1977,1981,1983,2197,3646,6187,6188,6189,6191,6201,6202,6203,6205,6206,6207,6208,6209,6210,6217,6218,6222,6223,6224,6228,6231,6232,7458,8661,8662,8663,8664,8666,8667,8668,8669,27335,51386	EIF1AX,EIF2S3,EIF4A1,EIF4B,EIF4E,EIF4G1,EIF5,FAU,EIF3E,RPS2,RPS3,RPS3A,RPS4X,RPS7,RPS8,RPS9,RPS11,RPS12,RPS13,RPS14,RPS15,RPS15A,RPS16,RPS17,RPS18,RPS19,RPS20,RPS23,RPS26,RPS27,EIF4H,EIF3A,EIF3B,EIF3C,EIF3D,EIF3G,EIF3H,EIF3I,EIF3J,EIF3K,EIF3L
1_Member	Reactome Gene Sets	R-HSA-72662	Activation of the mRNA upon binding of the cap-binding complex and eIFs, and subsequent binding to 43S	-42.9704	-40.223	41/60	1964,1968,1973,1975,1977,1981,2197,3646,6187,6188,6189,6191,6201,6202,6203,6205,6206,6207,6208,6209,6210,6217,6218,6222,6223,6224,6228,6231,6232,7458,8661,8662,8663,8664,8666,8667,8668,8669,26986,27335,51386	EIF1AX,EIF2S3,EIF4A1,EIF4B,EIF4E,EIF4G1,FAU,EIF3E,RPS2,RPS3,RPS3A,RPS4X,RPS7,RPS8,RPS9,RPS11,RPS12,RPS13,RPS14,RPS15,RPS15A,RPS16,RPS17,RPS18,RPS19,RPS20,RPS23,RPS26,RPS27,EIF4H,EIF3A,EIF3B,EIF3C,EIF3D,EIF3G,EIF3H,EIF3I,EIF3J,PABPC1,EIF3K,EIF3L
1_Member	Reactome Gene Sets	R-HSA-422475	Axon guidance	-42.211	-39.4848	106/553	160,161,163,998,1020,1173,1432,1459,1460,1808,1981,2107,2197,2932,2935,3312,3320,3326,4686,5291,5362,5683,5684,5685,5687,5689,5693,5694,5700,5701,5702,5704,5705,5706,5707,5708,5709,5710,5921,5962,6122,6124,6125,6128,6129,6130,6132,6133,6134,6135,6138,6139,6141,6142,6143,6147,6154,6156,6158,6159,6160,6161,6164,6168,6187,6188,6189,6191,6201,6202,6203,6205,6206,6207,6208,6209,6210,6217,6218,6222,622…	AP2A1,AP2A2,AP2B1,CDC42,CDK5,AP2M1,MAPK14,CSNK2A2,CSNK2B,DPYSL2,EIF4G1,ETF1,FAU,GSK3B,GSPT1,HSPA8,HSP90AA1,HSP90AB1,NCBP1,PIK3CB,PLXNA2,PSMA2,PSMA3,PSMA4,PSMA6,PSMB1,PSMB5,PSMB6,PSMC1,PSMC2,PSMC3,PSMC4,PSMC5,PSMC6,PSMD1,PSMD2,PSMD3,PSMD4,RASA1,RDX,RPL3,RPL4,RPL5,RPL6,RPL7,RPL7A,RPL8,RPL9,RPL10,RPL11,RPL15,RPL17,RPL18,RPL18A,RPL19,RPL23A,RPL26,RPL30,RPL28,RPL29,RPL31,RPL32,RPL34,RPL37A,RPS2,RPS3,R…
1_Member	KEGG Pathway	hsa03010	Ribosome	-41.7783	-39.0723	61/167	2197,6122,6124,6125,6128,6129,6130,6132,6133,6134,6135,6138,6139,6141,6142,6143,6147,6154,6156,6158,6159,6160,6161,6164,6168,6187,6188,6189,6191,6201,6202,6203,6205,6206,6207,6208,6209,6210,6217,6218,6222,6223,6224,6228,6231,6232,9045,9349,9801,11222,28998,29088,29093,51073,51116,54948,64928,65005,65008,124995,219927	FAU,RPL3,RPL4,RPL5,RPL6,RPL7,RPL7A,RPL8,RPL9,RPL10,RPL11,RPL15,RPL17,RPL18,RPL18A,RPL19,RPL23A,RPL26,RPL30,RPL28,RPL29,RPL31,RPL32,RPL34,RPL37A,RPS2,RPS3,RPS3A,RPS4X,RPS7,RPS8,RPS9,RPS11,RPS12,RPS13,RPS14,RPS15,RPS15A,RPS16,RPS17,RPS18,RPS19,RPS20,RPS23,RPS26,RPS27,RPL14,RPL23,MRPL19,MRPL3,MRPL13,MRPL15,MRPL22,MRPL4,MRPS2,MRPL16,MRPL14,MRPL9,MRPL1,MRPL10,MRPL21
1_Member	Reactome Gene Sets	R-HSA-9675108	Nervous system development	-40.3566	-37.6699	106/578	160,161,163,998,1020,1173,1432,1459,1460,1808,1981,2107,2197,2932,2935,3312,3320,3326,4686,5291,5362,5683,5684,5685,5687,5689,5693,5694,5700,5701,5702,5704,5705,5706,5707,5708,5709,5710,5921,5962,6122,6124,6125,6128,6129,6130,6132,6133,6134,6135,6138,6139,6141,6142,6143,6147,6154,6156,6158,6159,6160,6161,6164,6168,6187,6188,6189,6191,6201,6202,6203,6205,6206,6207,6208,6209,6210,6217,6218,6222,622…	AP2A1,AP2A2,AP2B1,CDC42,CDK5,AP2M1,MAPK14,CSNK2A2,CSNK2B,DPYSL2,EIF4G1,ETF1,FAU,GSK3B,GSPT1,HSPA8,HSP90AA1,HSP90AB1,NCBP1,PIK3CB,PLXNA2,PSMA2,PSMA3,PSMA4,PSMA6,PSMB1,PSMB5,PSMB6,PSMC1,PSMC2,PSMC3,PSMC4,PSMC5,PSMC6,PSMD1,PSMD2,PSMD3,PSMD4,RASA1,RDX,RPL3,RPL4,RPL5,RPL6,RPL7,RPL7A,RPL8,RPL9,RPL10,RPL11,RPL15,RPL17,RPL18,RPL18A,RPL19,RPL23A,RPL26,RPL30,RPL28,RPL29,RPL31,RPL32,RPL34,RPL37A,RPS2,RPS3,R…
1_Member	Reactome Gene Sets	R-HSA-1799339	SRP-dependent cotranslational protein targeting to membrane	-39.2367	-36.5774	50/113	2197,6122,6124,6125,6128,6129,6130,6132,6133,6134,6135,6138,6139,6141,6142,6143,6147,6154,6156,6158,6159,6160,6161,6164,6168,6187,6188,6189,6191,6201,6202,6203,6205,6206,6207,6208,6209,6210,6217,6218,6222,6223,6224,6228,6231,6232,6728,6729,9045,9349	FAU,RPL3,RPL4,RPL5,RPL6,RPL7,RPL7A,RPL8,RPL9,RPL10,RPL11,RPL15,RPL17,RPL18,RPL18A,RPL19,RPL23A,RPL26,RPL30,RPL28,RPL29,RPL31,RPL32,RPL34,RPL37A,RPS2,RPS3,RPS3A,RPS4X,RPS7,RPS8,RPS9,RPS11,RPS12,RPS13,RPS14,RPS15,RPS15A,RPS16,RPS17,RPS18,RPS19,RPS20,RPS23,RPS26,RPS27,SRP19,SRP54,RPL14,RPL23
1_Member	Reactome Gene Sets	R-HSA-9711097	Cellular response to starvation	-38.8935	-36.243	57/157	440,526,1968,2197,2475,6122,6124,6125,6128,6129,6130,6132,6133,6134,6135,6138,6139,6141,6142,6143,6147,6154,6156,6158,6159,6160,6161,6164,6168,6187,6188,6189,6191,6201,6202,6203,6205,6206,6207,6208,6209,6210,6217,6218,6222,6223,6224,6228,6231,6232,9045,9349,10312,10670,10985,245973,440275	ASNS,ATP6V1B2,EIF2S3,FAU,MTOR,RPL3,RPL4,RPL5,RPL6,RPL7,RPL7A,RPL8,RPL9,RPL10,RPL11,RPL15,RPL17,RPL18,RPL18A,RPL19,RPL23A,RPL26,RPL30,RPL28,RPL29,RPL31,RPL32,RPL34,RPL37A,RPS2,RPS3,RPS3A,RPS4X,RPS7,RPS8,RPS9,RPS11,RPS12,RPS13,RPS14,RPS15,RPS15A,RPS16,RPS17,RPS18,RPS19,RPS20,RPS23,RPS26,RPS27,RPL14,RPL23,TCIRG1,RRAGA,GCN1,ATP6V1C2,EIF2AK4
1_Member	Reactome Gene Sets	R-HSA-72695	Formation of the ternary complex, and subsequently, the 43S complex	-36.3859	-33.7525	35/52	1964,1968,2197,3646,6187,6188,6189,6191,6201,6202,6203,6205,6206,6207,6208,6209,6210,6217,6218,6222,6223,6224,6228,6231,6232,8661,8662,8663,8664,8666,8667,8668,8669,27335,51386	EIF1AX,EIF2S3,FAU,EIF3E,RPS2,RPS3,RPS3A,RPS4X,RPS7,RPS8,RPS9,RPS11,RPS12,RPS13,RPS14,RPS15,RPS15A,RPS16,RPS17,RPS18,RPS19,RPS20,RPS23,RPS26,RPS27,EIF3A,EIF3B,EIF3C,EIF3D,EIF3G,EIF3H,EIF3I,EIF3J,EIF3K,EIF3L
1_Member	Reactome Gene Sets	R-HSA-9679506	SARS-CoV Infections	-27.4439	-24.9332	74/414	160,161,163,207,598,1108,1173,1514,1655,1915,2197,2932,3276,3320,3326,3615,3837,3838,4089,4124,4790,5094,5479,5706,5928,5931,6187,6188,6189,6191,6201,6202,6203,6205,6206,6207,6208,6209,6210,6217,6218,6222,6223,6224,6228,6231,6232,7284,7335,7555,9112,9475,9818,9868,9972,10146,10728,10762,10802,11218,11253,11311,23028,23367,25929,30849,50628,54815,55746,57122,57504,64398,65082,203068	AP2A1,AP2A2,AP2B1,AKT1,BCL2L1,CHD4,AP2M1,CTSL,DDX5,EEF1A1,FAU,GSK3B,PRMT1,HSP90AA1,HSP90AB1,IMPDH2,KPNB1,KPNA2,SMAD4,MAN2A1,NFKB1,PCBP2,PPIB,PSMC6,RBBP4,RBBP7,RPS2,RPS3,RPS3A,RPS4X,RPS7,RPS8,RPS9,RPS11,RPS12,RPS13,RPS14,RPS15,RPS15A,RPS16,RPS17,RPS18,RPS19,RPS20,RPS23,RPS26,RPS27,TUFM,UBE2V1,CNBP,MTA1,ROCK2,NUP58,TOMM70,NUP153,G3BP1,PTGES3,NUP50,SEC24A,DDX20,MAN1B1,VPS45,KDM1A,LARP1,GEMIN5,PIK3R4…
1_Member	KEGG Pathway	hsa05171	Coronavirus disease - COVID-19	-24.1555	-21.6981	52/232	1432,2197,4790,5291,5610,6122,6124,6125,6128,6129,6130,6132,6133,6134,6135,6138,6139,6141,6142,6143,6147,6154,6156,6158,6159,6160,6161,6164,6168,6187,6188,6189,6191,6201,6202,6203,6205,6206,6207,6208,6209,6210,6217,6218,6222,6223,6224,6228,6231,6232,9045,9349	MAPK14,FAU,NFKB1,PIK3CB,EIF2AK2,RPL3,RPL4,RPL5,RPL6,RPL7,RPL7A,RPL8,RPL9,RPL10,RPL11,RPL15,RPL17,RPL18,RPL18A,RPL19,RPL23A,RPL26,RPL30,RPL28,RPL29,RPL31,RPL32,RPL34,RPL37A,RPS2,RPS3,RPS3A,RPS4X,RPS7,RPS8,RPS9,RPS11,RPS12,RPS13,RPS14,RPS15,RPS15A,RPS16,RPS17,RPS18,RPS19,RPS20,RPS23,RPS26,RPS27,RPL14,RPL23
1_Member	CORUM	CORUM:305	40S ribosomal subunit, cytoplasmic	-22.9232	-20.528	22/33	2197,6187,6188,6189,6191,6201,6202,6203,6205,6206,6207,6208,6209,6210,6217,6218,6222,6223,6224,6228,6231,6232	FAU,RPS2,RPS3,RPS3A,RPS4X,RPS7,RPS8,RPS9,RPS11,RPS12,RPS13,RPS14,RPS15,RPS15A,RPS16,RPS17,RPS18,RPS19,RPS20,RPS23,RPS26,RPS27
1_Member	Reactome Gene Sets	R-HSA-9735869	SARS-CoV-1 modulates host translation machinery	-22.8878	-20.4974	23/37	1915,2197,6187,6188,6189,6191,6201,6202,6203,6205,6206,6207,6208,6209,6210,6217,6218,6222,6223,6224,6228,6231,6232	EEF1A1,FAU,RPS2,RPS3,RPS3A,RPS4X,RPS7,RPS8,RPS9,RPS11,RPS12,RPS13,RPS14,RPS15,RPS15A,RPS16,RPS17,RPS18,RPS19,RPS20,RPS23,RPS26,RPS27
1_Member	CORUM	CORUM:338	40S ribosomal subunit, cytoplasmic	-22.1323	-19.7785	21/31	2197,6187,6188,6189,6191,6201,6202,6203,6205,6206,6207,6208,6209,6210,6217,6218,6222,6223,6224,6228,6231	FAU,RPS2,RPS3,RPS3A,RPS4X,RPS7,RPS8,RPS9,RPS11,RPS12,RPS13,RPS14,RPS15,RPS15A,RPS16,RPS17,RPS18,RPS19,RPS20,RPS23,RPS26
1_Member	Reactome Gene Sets	R-HSA-9692914	SARS-CoV-1-host interactions	-21.8829	-19.5587	33/96	598,1915,2197,3837,3838,4089,4790,5094,5479,5706,6187,6188,6189,6191,6201,6202,6203,6205,6206,6207,6208,6209,6210,6217,6218,6222,6223,6224,6228,6231,6232,9868,64398	BCL2L1,EEF1A1,FAU,KPNB1,KPNA2,SMAD4,NFKB1,PCBP2,PPIB,PSMC6,RPS2,RPS3,RPS3A,RPS4X,RPS7,RPS8,RPS9,RPS11,RPS12,RPS13,RPS14,RPS15,RPS15A,RPS16,RPS17,RPS18,RPS19,RPS20,RPS23,RPS26,RPS27,TOMM70,PALS1
1_Member	Reactome Gene Sets	R-HSA-9754678	SARS-CoV-2 modulates host translation machinery	-21.3059	-18.9979	25/51	2197,6187,6188,6189,6191,6201,6202,6203,6205,6206,6207,6208,6209,6210,6217,6218,6222,6223,6224,6228,6231,6232,11218,25929,50628	FAU,RPS2,RPS3,RPS3A,RPS4X,RPS7,RPS8,RPS9,RPS11,RPS12,RPS13,RPS14,RPS15,RPS15A,RPS16,RPS17,RPS18,RPS19,RPS20,RPS23,RPS26,RPS27,DDX20,GEMIN5,GEMIN4
1_Member	Reactome Gene Sets	R-HSA-9705683	SARS-CoV-2-host interactions	-20.7764	-18.4914	45/203	207,2197,3320,3326,3838,6187,6188,6189,6191,6201,6202,6203,6205,6206,6207,6208,6209,6210,6217,6218,6222,6223,6224,6228,6231,6232,7284,7335,7555,9818,9868,9972,10146,10762,10802,11218,11311,23367,25929,30849,50628,55746,57122,64398,65082	AKT1,FAU,HSP90AA1,HSP90AB1,KPNA2,RPS2,RPS3,RPS3A,RPS4X,RPS7,RPS8,RPS9,RPS11,RPS12,RPS13,RPS14,RPS15,RPS15A,RPS16,RPS17,RPS18,RPS19,RPS20,RPS23,RPS26,RPS27,TUFM,UBE2V1,CNBP,NUP58,TOMM70,NUP153,G3BP1,NUP50,SEC24A,DDX20,VPS45,LARP1,GEMIN5,PIK3R4,GEMIN4,NUP133,NUP107,PALS1,VPS33A
1_Member	Reactome Gene Sets	R-HSA-9678108	SARS-CoV-1 Infection	-19.7501	-17.5079	37/142	598,1514,1655,1915,2197,2932,3837,3838,4089,4790,5094,5479,5706,6187,6188,6189,6191,6201,6202,6203,6205,6206,6207,6208,6209,6210,6217,6218,6222,6223,6224,6228,6231,6232,9868,30849,64398	BCL2L1,CTSL,DDX5,EEF1A1,FAU,GSK3B,KPNB1,KPNA2,SMAD4,NFKB1,PCBP2,PPIB,PSMC6,RPS2,RPS3,RPS3A,RPS4X,RPS7,RPS8,RPS9,RPS11,RPS12,RPS13,RPS14,RPS15,RPS15A,RPS16,RPS17,RPS18,RPS19,RPS20,RPS23,RPS26,RPS27,TOMM70,PIK3R4,PALS1
1_Member	Reactome Gene Sets	R-HSA-9694516	SARS-CoV-2 Infection	-18.1508	-15.9686	51/299	207,1514,1655,2197,2932,3276,3320,3326,3838,4124,6187,6188,6189,6191,6201,6202,6203,6205,6206,6207,6208,6209,6210,6217,6218,6222,6223,6224,6228,6231,6232,7284,7335,7555,9818,9868,9972,10146,10762,10802,11218,11253,11311,23367,25929,30849,50628,55746,57122,64398,65082	AKT1,CTSL,DDX5,FAU,GSK3B,PRMT1,HSP90AA1,HSP90AB1,KPNA2,MAN2A1,RPS2,RPS3,RPS3A,RPS4X,RPS7,RPS8,RPS9,RPS11,RPS12,RPS13,RPS14,RPS15,RPS15A,RPS16,RPS17,RPS18,RPS19,RPS20,RPS23,RPS26,RPS27,TUFM,UBE2V1,CNBP,NUP58,TOMM70,NUP153,G3BP1,NUP50,SEC24A,DDX20,MAN1B1,VPS45,LARP1,GEMIN5,PIK3R4,GEMIN4,NUP133,NUP107,PALS1,VPS33A
2_Summary	GO Biological Processes	GO:0022613	ribonucleoprotein complex biogenesis	-55.1365	-52.0658	112/466	705,1653,1654,1736,1939,1968,1983,3320,3326,3646,3692,4686,5036,5591,5901,6059,6125,6128,6129,6134,6135,6147,6154,6201,6202,6203,6208,6209,6217,6218,6223,6232,6426,6430,6431,7514,7520,7536,8161,8451,8661,8662,8663,8664,8666,8667,8668,8669,9045,9188,9221,9416,9733,9879,10360,10419,10421,10436,10514,10521,10528,10658,10728,10799,10813,11168,11218,11340,22803,22827,22868,22894,22907,23160,23195,2322…	BYSL,DDX1,DDX3X,DKC1,EIF2D,EIF2S3,EIF5,HSP90AA1,HSP90AB1,EIF3E,EIF6,NCBP1,PA2G4,PRKDC,RAN,ABCE1,RPL5,RPL6,RPL7,RPL10,RPL11,RPL23A,RPL26,RPS7,RPS8,RPS9,RPS14,RPS15,RPS16,RPS17,RPS19,RPS27,SRSF1,SRSF5,SRSF6,XPO1,XRCC5,SF1,COIL,CUL4A,EIF3A,EIF3B,EIF3C,EIF3D,EIF3G,EIF3H,EIF3I,EIF3J,RPL14,DDX21,NOLC1,DDX23,SART3,DDX46,NPM3,PRMT5,CD2BP2,EMG1,MYBBP1A,DDX17,NOP56,CELF1,PTGES3,RPP40,UTP14A,PSIP1,DDX20,EXO…
2_Member	GO Biological Processes	GO:0022613	ribonucleoprotein complex biogenesis	-55.1365	-52.0658	112/466	705,1653,1654,1736,1939,1968,1983,3320,3326,3646,3692,4686,5036,5591,5901,6059,6125,6128,6129,6134,6135,6147,6154,6201,6202,6203,6208,6209,6217,6218,6223,6232,6426,6430,6431,7514,7520,7536,8161,8451,8661,8662,8663,8664,8666,8667,8668,8669,9045,9188,9221,9416,9733,9879,10360,10419,10421,10436,10514,10521,10528,10658,10728,10799,10813,11168,11218,11340,22803,22827,22868,22894,22907,23160,23195,2322…	BYSL,DDX1,DDX3X,DKC1,EIF2D,EIF2S3,EIF5,HSP90AA1,HSP90AB1,EIF3E,EIF6,NCBP1,PA2G4,PRKDC,RAN,ABCE1,RPL5,RPL6,RPL7,RPL10,RPL11,RPL23A,RPL26,RPS7,RPS8,RPS9,RPS14,RPS15,RPS16,RPS17,RPS19,RPS27,SRSF1,SRSF5,SRSF6,XPO1,XRCC5,SF1,COIL,CUL4A,EIF3A,EIF3B,EIF3C,EIF3D,EIF3G,EIF3H,EIF3I,EIF3J,RPL14,DDX21,NOLC1,DDX23,SART3,DDX46,NPM3,PRMT5,CD2BP2,EMG1,MYBBP1A,DDX17,NOP56,CELF1,PTGES3,RPP40,UTP14A,PSIP1,DDX20,EXO…
2_Member	GO Biological Processes	GO:0071826	ribonucleoprotein complex subunit organization	-34.8803	-32.2551	64/236	1653,1939,1968,1983,3320,3326,3646,3692,3831,4686,5591,6125,6128,6134,6135,6147,6208,6209,6223,6232,6426,6430,6431,7520,7536,8161,8661,8662,8663,8664,8666,8667,8668,8669,9416,9733,9879,10419,10421,10658,10728,11168,11218,22827,22868,22907,23195,23246,25929,25980,27335,27336,27339,28985,50628,51386,51747,55192,55299,56949,79084,79577,79869,84154	DDX1,EIF2D,EIF2S3,EIF5,HSP90AA1,HSP90AB1,EIF3E,EIF6,KLC1,NCBP1,PRKDC,RPL5,RPL6,RPL10,RPL11,RPL23A,RPS14,RPS15,RPS19,RPS27,SRSF1,SRSF5,SRSF6,XRCC5,SF1,COIL,EIF3A,EIF3B,EIF3C,EIF3D,EIF3G,EIF3H,EIF3I,EIF3J,DDX23,SART3,DDX46,PRMT5,CD2BP2,CELF1,PTGES3,PSIP1,DDX20,PUF60,FASTKD2,DHX30,MDN1,BOP1,GEMIN5,AAR2,EIF3K,HTATSF1,PRPF19,MCTS1,GEMIN4,EIF3L,LUC7L3,DNAJC17,BRIX1,XAB2,WDR77,CDC73,CPSF7,RPF2
2_Member	GO Biological Processes	GO:0022618	ribonucleoprotein complex assembly	-33.8779	-31.2609	62/228	1653,1939,1968,1983,3320,3326,3646,3692,4686,5591,6125,6128,6134,6135,6147,6208,6209,6223,6232,6426,6430,6431,7520,7536,8161,8661,8662,8663,8664,8666,8667,8668,8669,9416,9733,9879,10419,10421,10658,10728,11168,11218,22827,22868,22907,23195,23246,25929,25980,27335,27336,27339,28985,50628,51386,51747,55299,56949,79084,79577,79869,84154	DDX1,EIF2D,EIF2S3,EIF5,HSP90AA1,HSP90AB1,EIF3E,EIF6,NCBP1,PRKDC,RPL5,RPL6,RPL10,RPL11,RPL23A,RPS14,RPS15,RPS19,RPS27,SRSF1,SRSF5,SRSF6,XRCC5,SF1,COIL,EIF3A,EIF3B,EIF3C,EIF3D,EIF3G,EIF3H,EIF3I,EIF3J,DDX23,SART3,DDX46,PRMT5,CD2BP2,CELF1,PTGES3,PSIP1,DDX20,PUF60,FASTKD2,DHX30,MDN1,BOP1,GEMIN5,AAR2,EIF3K,HTATSF1,PRPF19,MCTS1,GEMIN4,EIF3L,LUC7L3,BRIX1,XAB2,WDR77,CDC73,CPSF7,RPF2
3_Summary	GO Biological Processes	GO:2000112	regulation of cellular macromolecule biosynthetic process	-45.4922	-42.6742	114/594	16,207,1153,1499,1653,1654,1656,1938,1975,1977,1981,1982,1983,2058,2107,2235,2332,2475,2629,2801,2932,2935,3276,3646,3692,4076,4343,4686,4691,4904,5036,5074,5499,5591,5610,5611,5813,5935,5976,6059,6125,6134,6154,6188,6191,6203,6208,6301,6311,6472,6646,6741,7072,7458,7555,7812,8087,8570,8662,8663,8664,8667,8890,8892,9221,9375,9475,9669,9689,10102,10128,10131,10399,10642,10643,10657,10658,10985,113…	AARS1,AKT1,CIRBP,CTNNB1,DDX1,DDX3X,DDX6,EEF2,EIF4B,EIF4E,EIF4G1,EIF4G2,EIF5,EPRS1,ETF1,FECH,FMR1,MTOR,GBA1,GOLGA2,GSK3B,GSPT1,PRMT1,EIF3E,EIF6,CAPRIN1,MOV10,NCBP1,NCL,YBX1,PA2G4,PAWR,PPP1CA,PRKDC,EIF2AK2,DNAJC3,PURA,RBM3,UPF1,ABCE1,RPL5,RPL10,RPL26,RPS3,RPS4X,RPS9,RPS14,SARS1,ATXN2,SHMT2,SOAT1,SSB,TIA1,EIF4H,CNBP,CSDE1,FXR1,KHSRP,EIF3B,EIF3C,EIF3D,EIF3H,EIF2B4,EIF2B2,NOLC1,TM9SF2,ROCK2,EIF5B,BZW1…
3_Member	GO Biological Processes	GO:2000112	regulation of cellular macromolecule biosynthetic process	-45.4922	-42.6742	114/594	16,207,1153,1499,1653,1654,1656,1938,1975,1977,1981,1982,1983,2058,2107,2235,2332,2475,2629,2801,2932,2935,3276,3646,3692,4076,4343,4686,4691,4904,5036,5074,5499,5591,5610,5611,5813,5935,5976,6059,6125,6134,6154,6188,6191,6203,6208,6301,6311,6472,6646,6741,7072,7458,7555,7812,8087,8570,8662,8663,8664,8667,8890,8892,9221,9375,9475,9669,9689,10102,10128,10131,10399,10642,10643,10657,10658,10985,113…	AARS1,AKT1,CIRBP,CTNNB1,DDX1,DDX3X,DDX6,EEF2,EIF4B,EIF4E,EIF4G1,EIF4G2,EIF5,EPRS1,ETF1,FECH,FMR1,MTOR,GBA1,GOLGA2,GSK3B,GSPT1,PRMT1,EIF3E,EIF6,CAPRIN1,MOV10,NCBP1,NCL,YBX1,PA2G4,PAWR,PPP1CA,PRKDC,EIF2AK2,DNAJC3,PURA,RBM3,UPF1,ABCE1,RPL5,RPL10,RPL26,RPS3,RPS4X,RPS9,RPS14,SARS1,ATXN2,SHMT2,SOAT1,SSB,TIA1,EIF4H,CNBP,CSDE1,FXR1,KHSRP,EIF3B,EIF3C,EIF3D,EIF3H,EIF2B4,EIF2B2,NOLC1,TM9SF2,ROCK2,EIF5B,BZW1…
3_Member	GO Biological Processes	GO:0006417	regulation of translation	-42.6694	-39.9327	102/506	16,207,1153,1653,1654,1656,1938,1975,1977,1981,1982,1983,2058,2107,2235,2332,2475,2935,3646,3692,4076,4343,4686,4691,4904,5036,5499,5591,5610,5611,5813,5935,5976,6059,6125,6134,6154,6188,6191,6203,6208,6301,6311,6472,6741,7072,7458,7555,7812,8087,8570,8662,8663,8664,8667,8890,8892,9221,9475,9669,9689,10102,10128,10131,10399,10642,10643,10657,10658,10985,11340,22868,22894,23019,23107,23367,23404,2…	AARS1,AKT1,CIRBP,DDX1,DDX3X,DDX6,EEF2,EIF4B,EIF4E,EIF4G1,EIF4G2,EIF5,EPRS1,ETF1,FECH,FMR1,MTOR,GSPT1,EIF3E,EIF6,CAPRIN1,MOV10,NCBP1,NCL,YBX1,PA2G4,PPP1CA,PRKDC,EIF2AK2,DNAJC3,PURA,RBM3,UPF1,ABCE1,RPL5,RPL10,RPL26,RPS3,RPS4X,RPS9,RPS14,SARS1,ATXN2,SHMT2,SSB,TIA1,EIF4H,CNBP,CSDE1,FXR1,KHSRP,EIF3B,EIF3C,EIF3D,EIF3H,EIF2B4,EIF2B2,NOLC1,ROCK2,EIF5B,BZW1,TSFM,LRPPRC,TRAP1,RACK1,IGF2BP1,IGF2BP3,KHDRBS1,…
3_Member	GO Biological Processes	GO:0034248	regulation of amide metabolic process	-40.8647	-38.1685	106/571	16,207,836,1153,1653,1654,1656,1938,1975,1977,1981,1982,1983,2058,2107,2235,2332,2475,2935,3646,3692,4076,4343,4686,4691,4904,5036,5300,5499,5591,5610,5611,5813,5935,5976,6059,6125,6134,6154,6188,6191,6203,6208,6301,6311,6472,6741,7072,7458,7555,7812,8087,8301,8570,8662,8663,8664,8667,8890,8892,9221,9475,9669,9689,10102,10128,10131,10399,10642,10643,10657,10658,10985,11340,22868,22894,23019,23107…	AARS1,AKT1,CASP3,CIRBP,DDX1,DDX3X,DDX6,EEF2,EIF4B,EIF4E,EIF4G1,EIF4G2,EIF5,EPRS1,ETF1,FECH,FMR1,MTOR,GSPT1,EIF3E,EIF6,CAPRIN1,MOV10,NCBP1,NCL,YBX1,PA2G4,PIN1,PPP1CA,PRKDC,EIF2AK2,DNAJC3,PURA,RBM3,UPF1,ABCE1,RPL5,RPL10,RPL26,RPS3,RPS4X,RPS9,RPS14,SARS1,ATXN2,SHMT2,SSB,TIA1,EIF4H,CNBP,CSDE1,FXR1,PICALM,KHSRP,EIF3B,EIF3C,EIF3D,EIF3H,EIF2B4,EIF2B2,NOLC1,ROCK2,EIF5B,BZW1,TSFM,LRPPRC,TRAP1,RACK1,IGF2BP…
3_Member	GO Biological Processes	GO:1903311	regulation of mRNA metabolic process	-27.5241	-25.0071	66/329	207,1025,1153,1432,1655,2332,2521,3190,3312,4343,4686,4691,4904,5935,5976,6294,6428,6431,7072,7186,7536,7812,8087,8148,8570,8761,9238,9475,9567,9584,10419,10521,10642,10643,10657,10658,10768,10914,11338,11340,22827,22868,22894,23019,23210,23367,23404,25904,26058,26135,26528,26986,27339,29883,51441,54502,55571,55677,55802,57703,79084,79577,79869,131405,201626,253943	AKT1,CDK9,CIRBP,MAPK14,DDX5,FMR1,FUS,HNRNPK,HSPA8,MOV10,NCBP1,NCL,YBX1,RBM3,UPF1,SAFB,SRSF3,SRSF6,TIA1,TRAF2,SF1,CSDE1,FXR1,TAF15,KHSRP,PABPC4,TBRG4,ROCK2,GTPBP1,RBM39,PRMT5,DDX17,IGF2BP1,IGF2BP3,KHDRBS1,CELF1,AHCYL1,PAPOLA,U2AF2,EXOSC8,PUF60,FASTKD2,DIS3,CNOT1,JMJD6,LARP1,EXOSC2,CNOT10,GIGYF2,SERBP1,DAZAP1,PABPC1,PRPF19,CNOT7,YTHDF2,RBM47,CNOT11,IWS1,DCP1A,CWC22,WDR77,CDC73,CPSF7,TRIM71,PDE12,YT…
3_Member	GO Biological Processes	GO:0045727	positive regulation of translation	-17.9806	-15.8073	35/141	1153,1654,1938,1981,2332,2475,3646,3692,4904,5591,5611,5935,6125,6154,6191,6741,7555,7812,8087,8663,8664,10642,10657,10985,22868,23107,23367,26986,51441,54931,55005,79727,81554,253943,440275	CIRBP,DDX3X,EEF2,EIF4G1,FMR1,MTOR,EIF3E,EIF6,YBX1,PRKDC,DNAJC3,RBM3,RPL5,RPL26,RPS4X,SSB,CNBP,CSDE1,FXR1,EIF3C,EIF3D,IGF2BP1,KHDRBS1,GCN1,FASTKD2,MRPS27,LARP1,PABPC1,YTHDF2,TRMT10C,RMND1,LIN28A,RCC1L,YTHDF3,EIF2AK4
3_Member	GO Biological Processes	GO:0034250	positive regulation of amide metabolic process	-17.9644	-15.7967	38/168	836,1153,1654,1938,1981,2332,2475,3646,3692,4904,5591,5611,5935,6125,6154,6191,6741,7555,7812,8087,8301,8663,8664,9475,10642,10657,10985,22868,23107,23367,26986,51441,54931,55005,79727,81554,253943,440275	CASP3,CIRBP,DDX3X,EEF2,EIF4G1,FMR1,MTOR,EIF3E,EIF6,YBX1,PRKDC,DNAJC3,RBM3,RPL5,RPL26,RPS4X,SSB,CNBP,CSDE1,FXR1,PICALM,EIF3C,EIF3D,ROCK2,IGF2BP1,KHDRBS1,GCN1,FASTKD2,MRPS27,LARP1,PABPC1,YTHDF2,TRMT10C,RMND1,LIN28A,RCC1L,YTHDF3,EIF2AK4
[truncated: 373 more rows]
