# Supplementary material for: Controlling placental spheroid growth and phenotype using engineered synthetic hydrogel matrices
Source: Royal Society of Chemistry journal article supplement (doi:10.1039/d3bm01393f), 2024-01-01
Supplement: d3bm01393f4.xlsx [file d3bm01393f4.xlsx]

## Sheet: Proteins
																															Abundance Ratio						Abundance Ratio (log2)			Abundance Ratio P-Value						Abundance Ratio Adj. P-Value
Checked	Protein FDR Confidence: Combined	Master	Accession	Description	Exp. q-value: Combined	Sum PEP Score	Coverage [%]	# Peptides	# PSMs	# Unique Peptides	# AAs	MW [kDa]	calc. pI	Score Sequest HT: Sequest HT	# Peptides (by Search Engine): Sequest HT	Biological Process	Cellular Component	Molecular Function	Pfam IDs	Entrez Gene ID	Ensembl Gene ID	Gene Symbol	Gene ID	Reactome Pathways	WikiPathways	# Protein Pathway Groups	# Razor Peptides	Abundance Ratio: (2D1-3) / (D1-3)	Abundance Ratio: (M1-3) / (D1-3)	Abundance Ratio: (V1-3) / (D1-3)	(Matrigel1-3) / (2D1-3)	(VPM1-3) / (2D1-3)	(VPM1-3) / (Matrigel1-3)	Abundance Ratio (log2): (2D1-3) / (D1-3)	Abundance Ratio (log2): (Matrigel1-3) / (D1-3)	Abundance Ratio (log2): (VPM1-3) / (D1-3)	(Matrigel1-3) / (2D1-3)	(VPM1-3) / (2D1-3)	(VPM1-3) / (Matrigel1-3)	Abundance Ratio P-VPMalue: (2D1-3) / (D1-3)	Abundance Ratio P-VPMalue: (Matrigel1-3) / (D1-3)	Abundance Ratio P-VPMalue: (VPM1-3) / (D1-3)	(Matrigel1-3) / (2D1-3)	(VPM1-3) / (2D1-3)	(VPM1-3) / (Matrigel1-3)	(2D1-3) / (D1-3)	(Matrigel1-3) / (D1-3)	(VPM1-3) / (D1-3)	(Matrigel1-3) / (2D1-3)
FALSE	High	Master Protein	P37268	Squalene synthase [OS=Homo sapiens]	0	37.169	19	6	40	6	417	48.1	6.54	115.04	6	cellular homeostasis	cytoskeleton;extracellular	structural molecule activity	Pf00494	2222	ENSG00000079459	FDFT1	B3KQ95; B4DJE5; B4DT56; B7Z1J3; hsa:2222; P37268; Q96GT0	PPARA activates gene expression; Activation of gene expression by SREBF (SREBP); Cholesterol biosynthesis	Cholesterol biosynthesis pathway; Sterol regulatory element-binding proteins (SREBP) signaling; Statin inhibition of cholesterol production; Ferroptosis; Cholesterol metabolism with Bloch and Kandutsch-Russell pathways	8	0	100	100	100	0.96	0.851	0.887	6.64	6.64	6.64	-0.06	-0.23	-0.17	1e-17	1e-17	1e-17	0.823981	0.557374	0.564525	2.25143e-17	2.43314e-17	2.35969e-17	0.985798
FALSE	High	Master Protein	O43709	Probable 18S rRNA (guanine-N(7))-methyltransferase [OS=Homo sapiens]	0	6.357	8	1	2	1	281	31.9	8.73	8.09	1	cell growth;cellular component movement;cellular homeostasis;metabolic process	membrane;nucleus	structural molecule activity	Pf08241, Pf12589	114049	ENSG00000071462	BUD23	A8K501; C9K060; hsa:114049; O43709; Q96P12; Q9BQ58; Q9HBP9	Major pathway of rRNA processing in the nucleolus and cytosol; rRNA modification in the nucleus and cytosol	7q11.23 copy number variation syndrome	3	0	100	100	100	0.333	1.301	3.905	6.64	6.64	6.64	-1.59	0.38	1.97	1e-17	1e-17	1e-17	0.187024	0.412572	0.0154296	2.25143e-17	2.43314e-17	2.35969e-17	0.639163
FALSE	High	Master Protein	Q13547	Histone deacetylase 1 [OS=Homo sapiens]	0	45.015	24	7	41	4	482	55.1	5.48	122.91	7	cell growth;cell organization and biogenesis;cellular homeostasis;coagulation;defense response;metabolic process	cytosol;membrane;nucleus	RNA binding;structural molecule activity	Pf00850	3065	ENSG00000116478	HDAC1	hsa:3065; Q13547; Q92534	Potential therapeutics for SARS; HDACs deacetylate histones; NoRC negatively regulates rRNA expression; Regulation of PTEN gene transcription; Constitutive Signaling by NOTCH1 PEST Domain Mutants; Constitutive Signaling by NOTCH1 HD+PEST Domain Mutants; Downregulation of SMAD2/3:SMAD4 transcriptional activity; NOTCH1 Intracellular Domain Regulates Transcription; Notch-HLH transcription pathway; R…	Androgen receptor signaling pathway; Energy metabolism; Cell cycle; TNF-related weak inducer of apoptosis (TWEAK) signaling pathway; Neural crest differentiation; Retinoblastoma gene in cancer; Notch signaling; Apoptosis-related network due to altered Notch3 in ovarian cancer; Initiation of transcription and translation elongation at the HIV-1 LTR; MECP2 and associated Rett syndrome; IL-6 signali…	53	0	100	100	100	0.726	1.056	1.455	6.64	6.64	6.64	-0.46	0.08	0.54	1e-17	1e-17	1e-17	0.577461	0.723205	0.413405	2.25143e-17	2.43314e-17	2.35969e-17	0.939542
FALSE	High	Master Protein	Q2VIQ3	Chromosome-associated kinesin KIF4B [OS=Homo sapiens]	0.001	4.012	1	1	6	1	1234	139.9	6.18	9.26	1	cell differentiation;cell growth;metabolic process	cytosol;endoplasmic reticulum;membrane	motor activity;RNA binding;structural molecule activity	Pf00225	285643	ENSG00000226650	KIF4B	hsa:285643; Q2VIQ3	COPI-dependent Golgi-to-ER retrograde traffic; Recycling pathway of L1; MHC class II antigen presentation; Kinesins		4	0	100	100	100	0.264	1.139	4.311	6.64	6.64	6.64	-1.92	0.19	2.11	1e-17	1e-17	1e-17	0.0878925	0.538654	0.0155394	2.25143e-17	2.43314e-17	2.35969e-17	0.407682
FALSE	Low	Master Protein	Q86YM7	Homer protein homolog 1 [OS=Homo sapiens]	0.058	1.511	4	1	1	1	354	40.3	5.44	0	1	cell death;cell growth;defense response;development;metabolic process	cytoplasm;cytoskeleton;cytosol;endoplasmic reticulum;nucleus	antioxidant activity;structural molecule activity	Pf00568	9456	ENSG00000152413	HOMER1	B2R688; hsa:9456; O96003; Q86YM5; Q86YM7	Neurexins and neuroligins	BDNF-TrkB signaling; Synaptic signaling pathways associated with autism spectrum disorder; Fragile X syndrome; Disruption of postsynaptic signaling by CNV; Orexin receptor pathway	6	0	100	100	100	1.095	0.713	0.651	6.64	6.64	6.64	0.13	-0.49	-0.62	1e-17	1e-17	1e-17	0.427667	0.345447	0.116828	2.25143e-17	2.43314e-17	2.35969e-17	0.8729
FALSE	Medium	Master Protein	Q8IW50	Protein FAM219A [OS=Homo sapiens]	0.03	1.815	7	1	2	1	185	20.4	4.73	1.83	1				Pf15260	203259	ENSG00000164970	FAM219A	A2A364; B4DFE1; B4DSR8; hsa:203259; Q5T590; Q5T591; Q5T592; Q5T594; Q5T595; Q8IW50; Q8TAZ8			0	0	100	100	100	1.196	1.41	1.179	6.64	6.64	6.64	0.26	0.5	0.24	1e-17	1e-17	1e-17	0.347577	0.26094	0.790785	2.25143e-17	2.43314e-17	2.35969e-17	0.824684
FALSE	Medium	Master Protein	P08253	72 kDa type IV collagenase [OS=Homo sapiens]	0.01	2.454	2	1	6	1	660	73.8	5.47	3.78	1	cell growth;cell organization and biogenesis;cellular homeostasis;coagulation;defense response;development;metabolic process	cell surface;cytoplasm;cytoskeleton;endoplasmic reticulum;endosome;membrane	structural molecule activity	Pf00040, Pf00045, Pf00413, Pf01471	4313	ENSG00000087245	MMP2	B2R6U1; B4DWH3; E9PE45; hsa:4313; P08253; Q9UCJ8	Regulation of Insulin-like Growth Factor (IGF) transport and uptake by Insulin-like Growth Factor Binding Proteins (IGFBPs); Interleukin-4 and Interleukin-13 signaling; Collagen degradation; Extra-nuclear estrogen signaling; EPH-ephrin mediated repulsion of cells; Activation of Matrix Metalloproteinases	Matrix metalloproteinases; AGE/RAGE pathway; Bladder cancer; RAC1/PAK1/p38/MMP2 pathway; Photodynamic therapy-induced NF-kB survival signaling; Lung fibrosis; VEGFA-VEGFR2 signaling pathway; Epithelial to mesenchymal transition in colorectal cancer; Cell migration and invasion through p75NTR; Neural crest cell migration during development; Neural crest cell migration in cancer; Male infertility; …	22	0	0.01	0.01	0.49		100	100	-6.64	-6.64	-1.03		6.64	6.64	1e-17	1e-17	0.0199283		1e-17	1e-17	2.25143e-17	2.43314e-17	0.0406417
FALSE	Medium	Master Protein	Q9NZR1	Tropomodulin-2 [OS=Homo sapiens]	0.034	1.782	2	1	1	1	351	39.6	5.27	0	1	cell death;cell growth;defense response;metabolic process	endoplasmic reticulum;nucleus	motor activity	Pf03250	29767	ENSG00000128872	TMOD2	B4DEW6; hsa:29767; Q9NZR1	Striated Muscle Contraction		1	0	0.01	0.43	0.265	100	100	0.615	-6.64	-1.22	-1.92	6.64	6.64	-0.7	1e-17	0.0415544	0.0177725	1e-17	1e-17	0.100734	2.25143e-17	0.0848317	0.036418	1.33839e-16
FALSE	High	Master Protein	Q9P2X3	Protein IMPACT [OS=Homo sapiens]	0.001	5.141	7	2	7	2	320	36.5	4.97	11.75	2	cell growth;coagulation;defense response;metabolic process	nucleus	motor activity;protein binding	Pf01205, Pf05773	55364	ENSG00000154059	IMPACT	A8MXG0; hsa:55364; Q49AM0; Q9H2X4; Q9P2X3	Response of EIF2AK4 (GCN2) to amino acid deficiency		1	0	100	100	100	0.895	1.217	1.36	6.64	6.64	6.64	-0.16	0.28	0.44	1e-17	1e-17	1e-17	0.733606	0.510289	0.825554	2.25143e-17	2.43314e-17	2.35969e-17	0.980195
FALSE	High	Master Protein	Q13523	Serine/threonine-protein kinase PRP4 homolog [OS=Homo sapiens]	0.001	3.926	3	2	3	2	1007	116.9	10.26	0	2	cell organization and biogenesis;cellular component movement;cellular homeostasis	membrane;nucleus	signal transducer activity;structural molecule activity	Pf00069	8899	ENSG00000112739	PRPF4B	A8K5C9; hsa:8899; Q13523; Q5D0F6; Q5TAY8; Q8IVC3; Q8TDP2; Q96QT7; Q9UEE6		mRNA processing	1	0	100	100	100	0.909	1.007	1.108	6.64	6.64	6.64	-0.14	0.01	0.15	1e-17	1e-17	1e-17	0.647104	0.89325	0.659751	2.25143e-17	2.43314e-17	2.35969e-17	0.966783
FALSE	High	Master Protein	Q9H8H0	Nucleolar protein 11 [OS=Homo sapiens]	0.001	4.434	2	1	4	1	719	81.1	6.07	10.05	1	cellular component movement;cellular homeostasis;metabolic process	membrane		Pf08168	25926	ENSG00000130935	NOL11	B7Z5V9; hsa:25926; Q7L5S1; Q9H8H0; Q9UG18	Major pathway of rRNA processing in the nucleolus and cytosol; rRNA modification in the nucleus and cytosol		2	0	100	100	100	1.157	1.684	1.455	6.64	6.64	6.64	0.21	0.75	0.54	1e-17	1e-17	1e-17	0.374453	0.101974	0.766867	2.25143e-17	2.43314e-17	2.35969e-17	0.841405
FALSE	High	Master Protein	P50750	Cyclin-dependent kinase 9 [OS=Homo sapiens]	0	13.571	16	4	11	3	372	42.8	8.79	13.02	4	cell differentiation;cell organization and biogenesis;cell proliferation;cellular component movement;cellular homeostasis;coagulation;metabolic process	membrane;nucleus	RNA binding;signal transducer activity;structural molecule activity	Pf00069	1025	ENSG00000136807	CDK9	hsa:1025; P50750; Q5JU24; Q5JU25; Q5U006; Q96TF1	Estrogen-dependent gene expression; Formation of RNA Pol II elongation complex ; Formation of HIV elongation complex in the absence of HIV Tat; Formation of HIV-1 elongation complex containing HIV-1 Tat; Pausing and recovery of Tat-mediated HIV elongation; Tat-mediated HIV elongation arrest and recovery; HIV elongation arrest and recovery; Pausing and recovery of HIV elongation; RNA Polymerase II…	MicroRNAs in cardiomyocyte hypertrophy; IL-9 signaling pathway; Cardiac hypertrophic response; Initiation of transcription and translation elongation at the HIV-1 LTR; Male infertility	20	0	100	100	100	0.797	1.103	1.384	6.64	6.64	6.64	-0.33	0.14	0.47	1e-17	1e-17	1e-17	0.941492	0.670718	0.723531	2.25143e-17	2.43314e-17	2.35969e-17	0.994946
FALSE	High	Master Protein	Q8NEM7	Transcription factor SPT20 homolog [OS=Homo sapiens]	0	7.479	3	1	1	1	779	85.7	8.48	3.31	1	cellular homeostasis;defense response;metabolic process	membrane	structural molecule activity	Pf12090	55578	ENSG00000102710	SUPT20H	E7ER46; hsa:55578; Q71RF3; Q8NEM7; Q9Y6A6	HATs acetylate histones		1	0	100	100	100	0.656	1.029	1.568	6.64	6.64	6.64	-0.61	0.04	0.65	1e-17	1e-17	1e-17	0.911623	0.861086	0.734924	2.25143e-17	2.43314e-17	2.35969e-17	0.992849
FALSE	High	Master Protein	Q5SRE5	Nucleoporin NUP188 [OS=Homo sapiens]	0	9.479	3	3	15	3	1749	195.9	6.73	17.39	3	conjugation	cytosol;membrane	structural molecule activity	Pf10487	23511	ENSG00000095319	NUP188	hsa:23511; Q14675; Q2TA87; Q5SRE5; Q7Z3K8; Q8IWF1	HCMV Early Events; Transport of Mature mRNA derived from an Intron-Containing Transcript; ISG15 antiviral mechanism; NS1 Mediated Effects on Host Pathways; SUMOylation of DNA replication proteins; Vpr-mediated nuclear import of PICs; snRNP Assembly; Regulation of HSF1-mediated heat shock response; Nuclear Pore Complex (NPC) Disassembly; HCMV Late Events; Transcriptional regulation by small RNAs; …		28	0	100	100	100	0.737	1.997	2.709	6.64	6.64	6.64	-0.44	1	1.44	1e-17	1e-17	1e-17	0.95807	0.0424504	0.0824326	2.25143e-17	2.43314e-17	2.35969e-17	0.997943
FALSE	High	Master Protein	O15321	Transmembrane 9 superfamily member 1 [OS=Homo sapiens]	0.001	4.119	6	2	2	2	606	68.8	7.17	2.59	2	cellular homeostasis;metabolic process	cytoskeleton;mitochondrion;nucleus		Pf02990	10548	ENSG00000100926; ENSG00000285465	TM9SF1	D3DS65; hsa:10548; O15321; Q86SZ6; Q96FI8			0	0	100	100	100	0.417	2.394	5.747	6.64	6.64	6.64	-1.26	1.26	2.52	1e-17	1e-17	1e-17	0.331439	0.00441837	0.00220871	2.25143e-17	2.43314e-17	2.35969e-17	0.805403
FALSE	High	Master Protein	P49902	Cytosolic purine 5'-nucleotidase [OS=Homo sapiens]	0	14.719	12	4	23	4	561	64.9	6.14	35.63	4	cellular homeostasis	cytosol	structural molecule activity	Pf05761	22978	ENSG00000076685	NT5C2	B7Z382; D3DR91; hsa:22978; P49902; Q5JUV5	Abacavir metabolism; Purine catabolism		2	0	100	100	100	1.044	1.171	1.121	6.64	6.64	6.64	0.06	0.23	0.17	1e-17	1e-17	1e-17	0.572689	0.481857	0.96226	2.25143e-17	2.43314e-17	2.35969e-17	0.939378
FALSE	High	Master Protein	Q9HBM1	Kinetochore protein Spc25 [OS=Homo sapiens]	0.008	2.562	5	1	3	1	224	26.1	8	2.29	1	cell differentiation;cell growth;metabolic process	cytosol;membrane;nucleus		Pf08234	57405	ENSG00000152253; ENSG00000277909	SPC25	A8K4X8; D3DPC0; hsa:57405; Q9HBM1	Separation of Sister Chromatids; Resolution of Sister Chromatid Cohesion; RHO GTPases Activate Formins; EML4 and NUDC in mitotic spindle formation; Amplification of signal from unattached kinetochores via a MAD2 inhibitory signal		6	0	100	100	100	0.598	1.067	1.785	6.64	6.64	6.64	-0.74	0.09	0.84	1e-17	1e-17	1e-17	0.780373	0.748923	0.535701	2.25143e-17	2.43314e-17	2.35969e-17	0.983539
FALSE	High	Master Protein	P29084	Transcription initiation factor IIE subunit beta [OS=Homo sapiens]	0.002	3.45	8	1	6	1	291	33	9.66	0	1	cellular component movement;cellular homeostasis	cytosol;membrane	RNA binding;structural molecule activity	Pf02186, Pf18121	2961	ENSG00000197265	GTF2E2	D3DSV2; hsa:2961; P29084; Q9H2B9	RNA Polymerase II Pre-transcription Events; HIV Transcription Initiation; RNA Polymerase II HIV Promoter Escape; RNA Polymerase II Promoter Escape; RNA Polymerase II Transcription Pre-Initiation And Promoter Opening; RNA Polymerase II Transcription Initiation; RNA polymerase II transcribes snRNA genes	Eukaryotic transcription initiation	10	0	100	100	100	0.731	0.648	0.886	6.64	6.64	6.64	-0.45	-0.63	-0.17	1e-17	1e-17	1e-17	0.940237	0.286067	0.438212	2.25143e-17	2.43314e-17	2.35969e-17	0.994297
FALSE	High	Master Protein	O00401	Neural Wiskott-Aldrich syndrome protein [OS=Homo sapiens]	0	19.597	20	4	22	4	505	54.8	7.93	48.27	4	cell differentiation;cell growth;conjugation;defense response;metabolic process	cytoplasm;cytoskeleton;cytosol;endoplasmic reticulum;membrane;nucleus	DNA binding;motor activity	Pf00568, Pf00786, Pf02205	8976	ENSG00000106299	WASL	A1JUI9; hsa:8976; O00401; Q7Z746	Regulation of actin dynamics for phagocytic cup formation; FCGR3A-mediated phagocytosis; CDC42 GTPase cycle; RAC1 GTPase cycle; RHOQ GTPase cycle; RHO GTPases Activate WASPs and WAVEs; RHOJ GTPase cycle; RHOV GTPase cycle; Clathrin-mediated endocytosis; NOSTRIN mediated eNOS trafficking; Nephrin family interactions; EPHB-mediated forward signaling; DCC mediated attractive signaling	Pathogenic Escherichia coli infection; Factors and pathways affecting insulin-like growth factor (IGF1)-Akt signaling; Chemokine signaling pathway; G13 signaling pathway	17	0	100	100	100	0.672	1.007	1.499	6.64	6.64	6.64	-0.57	0.01	0.58	1e-17	1e-17	1e-17	0.787476	0.917595	0.669252	2.25143e-17	2.43314e-17	2.35969e-17	0.983539
FALSE	High	Master Protein	Q9Y3C1	Nucleolar protein 16 [OS=Homo sapiens]	0.001	4.568	15	2	6	2	178	21.2	9.94	0	2	metabolic process	membrane;nucleus		Pf09420	51491	ENSG00000048162	NOP16	B4DV13; D6RGD3; hsa:51491; Q05D05; Q6IAI6; Q6PIM0; Q8IXL5; Q9Y3C1			0	0	100	100	100	0.785	1.049	1.337	6.64	6.64	6.64	-0.35	0.07	0.42	1e-17	1e-17	1e-17	0.923451	0.844189	0.896396	2.25143e-17	2.43314e-17	2.35969e-17	0.992849
FALSE	High	Master Protein	P49959	Double-strand break repair protein MRE11 [OS=Homo sapiens]	0	14.871	11	4	14	4	708	80.5	5.9	29.17	4	cell differentiation;cell growth;cell proliferation;cellular homeostasis;coagulation;development;metabolic process	cytosol;membrane;nucleus	RNA binding;structural molecule activity	Pf00149, Pf04152	4361	ENSG00000020922	MRE11	B3KTC7; hsa:4361; O43475; P49959	Regulation of TP53 Activity through Phosphorylation; Processing of DNA double-strand break ends; Presynaptic phase of homologous DNA pairing and strand exchange; G2/M DNA damage checkpoint; Meiotic recombination; Recruitment and ATM-mediated phosphorylation of repair and signaling proteins at DNA double strand breaks; DNA Damage/Telomere Stress Induced Senescence; Nonhomologous End-Joining (NHEJ)…	miRNA regulation of DNA damage response; Homologous recombination; DDX1 as a regulatory component of the Drosha microprocessor; ATM signaling in development and disease ; Breast cancer pathway; Joubert syndrome; DNA repair pathways, full network; SMC1/SMC3 role in DNA damage - Cornelia de Lange Syndrome; DNA damage response	29	0	100	100	100	0.693	0.892	1.288	6.64	6.64	6.64	-0.53	-0.16	0.37	1e-17	1e-17	1e-17	0.750196	0.804301	0.823462	2.25143e-17	2.43314e-17	2.35969e-17	0.981654
FALSE	High	Master Protein	Q8N1G2	Cap-specific mRNA (nucleoside-2'-O-)-methyltransferase 1 [OS=Homo sapiens]	0.001	4.566	3	2	3	2	835	95.3	7.05	2.56	2	cellular component movement;cellular homeostasis	membrane;nucleus	RNA binding;structural molecule activity	Pf01585, Pf01728	23070	ENSG00000137200	CMTR1	A8K949; hsa:23070; Q14670; Q8N1G2; Q96FJ9			0	0	100	100	100	0.739	1.074	1.454	6.64	6.64	6.64	-0.44	0.1	0.54	1e-17	1e-17	1e-17	0.998565	0.801252	0.749702	2.25143e-17	2.43314e-17	2.35969e-17	0.999981
FALSE	High	Master Protein	Q8N5Z0	Kynurenine/alpha-aminoadipate aminotransferase, mitochondrial [OS=Homo sapiens]	0.001	3.968	5	1	4	1	425	47.3	6.96	2.16	1	cellular homeostasis	endosome	structural molecule activity	Pf00155	51166	ENSG00000109576	AADAT	B3KP84; hsa:51166; Q8N5Z0; Q9UL02	Lysine catabolism; Tryptophan catabolism	Tryptophan metabolism	3	0	100	100	100	0.75	0.566	0.755	6.64	6.64	6.64	-0.42	-0.82	-0.41	1e-17	1e-17	1e-17	0.901423	0.096305	0.224188	2.25143e-17	2.43314e-17	2.35969e-17	0.992575
FALSE	High	Master Protein	Q8WX92	Negative elongation factor B [OS=Homo sapiens]	0	23.832	19	6	25	6	580	65.7	6.13	36.56	6	cell differentiation;metabolic process	membrane;nucleus	RNA binding	Pf06209	25920	ENSG00000188986	NELFB	A0A0X1KG71; A2BFA3; hsa:25920; Q8WX92; Q96EW5; Q9H9R4; Q9ULN8; Q9Y3W0	RNA Polymerase II Pre-transcription Events; TP53 Regulates Transcription of DNA Repair Genes; Formation of RNA Pol II elongation complex ; Formation of HIV elongation complex in the absence of HIV Tat; Formation of HIV-1 elongation complex containing HIV-1 Tat; Formation of the Early Elongation Complex; Formation of the HIV-1 Early Elongation Complex; Pausing and recovery of Tat-mediated HIV elon…	Initiation of transcription and translation elongation at the HIV-1 LTR	16	0	100	100	100	0.564	0.833	1.476	6.64	6.64	6.64	-0.83	-0.26	0.56	1e-17	1e-17	1e-17	0.397589	0.638293	0.550967	2.25143e-17	2.43314e-17	2.35969e-17	0.861541
FALSE	High	Master Protein	Q96SY0	Integrator complex subunit 14 [OS=Homo sapiens]	0	6.384	6	2	7	2	518	57.4	5.12	0	2	cellular component movement;cellular homeostasis	membrane		Pf13519, Pf19435, Pf20504	81556	ENSG00000138614	INTS14	B4DDI6; B4DVD5; hsa:81556; Q49AH8; Q96HX5; Q96SY0; Q9H0S5	RNA polymerase II transcribes snRNA genes		1	0	100	100	100	0.735	1.309	1.78	6.64	6.64	6.64	-0.44	0.39	0.83	1e-17	1e-17	1e-17	0.934844	0.341449	0.543291	2.25143e-17	2.43314e-17	2.35969e-17	0.993688
FALSE	Medium	Master Protein	Q68DQ2	Very large A-kinase anchor protein [OS=Homo sapiens]	0.016	2.197	1	1	2	1	2970	330.4	5.2	0	1	defense response;metabolic process	nucleus	structural molecule activity	Pf00030, Pf00652	131544	ENSG00000080200	CRYBG3	B4DLE8; F6VHI2; hsa:131544; Q4G0V8; Q68DQ2; Q7Z4R9; Q86VD0; Q8N262; Q8N7F1; Q8NDQ8			0	0	0.01	14.697	10.758	100	100	0.732	-6.64	3.88	3.43	6.64	6.64	-0.45	1e-17	0.911144	0.756497	1e-17	1e-17	0.232546	2.25143e-17	0.957353	0.889133	1.33839e-16
FALSE	High	Master Protein	O43252	Bifunctional 3'-phosphoadenosine 5'-phosphosulfate synthase 1 [OS=Homo sapiens]	0	57.732	30	12	71	12	624	70.8	6.86	157.62	12	cellular homeostasis;defense response	cytosol	signal transducer activity;structural molecule activity	Pf01583, Pf01747, Pf14306	9061	ENSG00000138801	PAPSS1	hsa:9061; O43252; O43841; O75332; Q6IAX6; Q96FB1; Q96TF4; Q9P1P9; Q9UE98	Signaling by BRAF and RAF1 fusions; Transport and synthesis of PAPS; Metabolism of ingested H2SeO4 and H2SeO3 into H2Se	Sulfation biotransformation reaction	4	0	100	100	99.598	1.226	0.922	0.752	6.64	6.64	6.64	0.29	-0.12	-0.41	1e-17	1e-17	0.0565995	0.292132	0.838752	0.246969	2.25143e-17	2.43314e-17	0.109455	0.768324
FALSE	High	Master Protein	Q9NUM4	Transmembrane protein 106B [OS=Homo sapiens]	0.002	3.272	5	1	9	1	274	31.1	6.99	1.81	1	cell growth;cell organization and biogenesis;cellular homeostasis;conjugation;defense response;metabolic process	cytoskeleton;mitochondrion	structural molecule activity	Pf07092	54664	ENSG00000106460	TMEM106B	A4D108; hsa:54664; Q53FL9; Q8N4L0; Q9NUM4			0	0	100	100	100	0.624	0.814	1.303	6.64	6.64	6.64	-0.68	-0.3	0.38	1e-17	1e-17	1e-17	0.858537	0.683311	0.999922	2.25143e-17	2.43314e-17	2.35969e-17	0.985798
FALSE	High	Master Protein	Q96DX4	RING finger and SPRY domain-containing protein 1 [OS=Homo sapiens]	0.006	2.775	3	1	1	1	576	64.1	5.57	2.19	1	cell organization and biogenesis;cellular homeostasis	cell surface;nucleus	structural molecule activity	Pf00622, Pf13920	89970	ENSG00000159579	RSPRY1	hsa:89970; Q6UX21; Q8ND53; Q96DX4			0	0	100	100	100	0.494	0.825	1.671	6.64	6.64	6.64	-1.02	-0.28	0.74	1e-17	1e-17	1e-17	0.517459	0.631893	0.602778	2.25143e-17	2.43314e-17	2.35969e-17	0.919947
FALSE	High	Master Protein	Q8TDD1	ATP-dependent RNA helicase DDX54 [OS=Homo sapiens]	0.001	4.088	5	2	6	2	881	98.5	10.02	4.51	2	cellular component movement;cellular homeostasis;development;metabolic process	extracellular;membrane	antioxidant activity;structural molecule activity	Pf00270, Pf00271, Pf08147	79039	ENSG00000123064	DDX54	hsa:79039; Q86YT8; Q8TDD1; Q9BRZ1			0	0	100	100	100	1.58	1.589	1.006	6.64	6.64	6.64	0.66	0.67	0.01	1e-17	1e-17	1e-17	0.139348	0.140717	0.679493	2.25143e-17	2.43314e-17	2.35969e-17	0.54705
FALSE	High	Master Protein	Q9C0C4	Semaphorin-4C [OS=Homo sapiens]	0	8.572	8	3	6	3	833	92.6	7.28	5.47	3	cell growth;defense response;development;metabolic process	cytoplasm;cytoskeleton;extracellular;nucleus	antioxidant activity	Pf01403, Pf01437	54910	ENSG00000168758	SEMA4C	hsa:54910; Q32MJ3; Q7Z5X0; Q9C0C4			0	0	100	100	100	0.596	3.279	5.497	6.64	6.64	6.64	-0.75	1.71	2.46	1e-17	1e-17	1e-17	0.785767	0.000506552	0.000503047	2.25143e-17	2.43314e-17	2.35969e-17	0.983539
FALSE	High	Master Protein	Q9P2X0	Dolichol-phosphate mannosyltransferase subunit 3 [OS=Homo sapiens]	0.001	4.437	11	1	6	1	92	10.1	5.94	16.5	1	cell organization and biogenesis;cellular homeostasis;metabolic process	cytoskeleton;extracellular;nucleus	DNA binding	Pf08285	54344	ENSG00000179085	DPM3	hsa:54344; Q5SR62; Q5SR63; Q9BXN4; Q9BXN5; Q9P2X0	Synthesis of dolichyl-phosphate mannose; Defective DPM1 causes DPM1-CDG; Defective DPM3 causes DPM3-CDG; Defective DPM2 causes DPM2-CDG		4	0	100	100	100	1.695	0.962	0.567	6.64	6.64	6.64	0.76	-0.06	-0.82	1e-17	1e-17	1e-17	0.105662	0.964822	0.0792443	2.25143e-17	2.43314e-17	2.35969e-17	0.458153
FALSE	High	Master Protein	Q96C86	m7GpppX diphosphatase [OS=Homo sapiens]	0	27.122	28	6	34	6	337	38.6	6.38	64.17	6	cellular component movement;cellular homeostasis;metabolic process	cytosol;endosome;membrane;nucleus	RNA binding;structural molecule activity	Pf05652, Pf11969	28960	ENSG00000110063	DCPS	hsa:28960; Q8NHL8; Q96C86; Q9Y2S5	mRNA decay by 3' to 5' exoribonuclease		1	0	100	100	100	1.062	1.074	1.012	6.64	6.64	6.64	0.09	0.1	0.02	1e-17	1e-17	1e-17	0.593701	0.654725	0.802931	2.25143e-17	2.43314e-17	2.35969e-17	0.947297
FALSE	Medium	Master Protein	P29558	RNA-binding motif, single-stranded-interacting protein 1 [OS=Homo sapiens]	0.022	2.021	9	1	2	1	406	44.5	8.79	0	1	cellular component movement;cellular homeostasis	cytosol;membrane;nucleus	RNA binding	Pf00076	5937	ENSG00000153250	RBMS1	hsa:5937; P29558; Q14869; Q15433; Q53P46; Q53QX8; Q53RG6; Q8WV20			0	0	100	100	100	0.578	0.676	1.17	6.64	6.64	6.64	-0.79	-0.56	0.23	1e-17	1e-17	1e-17	0.701467	0.347541	0.780887	2.25143e-17	2.43314e-17	2.35969e-17	0.97309
FALSE	High	Master Protein	Q9BW19	Kinesin-like protein KIFC1 [OS=Homo sapiens]	0	8.557	5	2	7	2	673	73.7	8.98	16.55	2	cell differentiation;cell growth;metabolic process	endoplasmic reticulum;membrane;mitochondrion	motor activity;structural molecule activity	Pf00225	3833	ENSG00000204197; ENSG00000233450; ENSG00000237649	KIFC1	hsa:3833; O60887; Q14834; Q4KMP0; Q5SU09; Q6GMS7; Q6P4A5; Q9BW19; Q9UQP7	COPI-dependent Golgi-to-ER retrograde traffic; Kinesins		2	0	100	100	100	0.086	1.015	11.764	6.64	6.64	6.64	-3.54	0.02	3.56	1e-17	1e-17	1e-17	0.000206004	0.809641	2.0026e-05	2.25143e-17	2.43314e-17	2.35969e-17	0.00204725
FALSE	High	Master Protein	Q86W42	THO complex subunit 6 homolog [OS=Homo sapiens]	0	16.437	19	4	17	4	341	37.5	7.43	29.49	4	cellular component movement;cellular homeostasis;conjugation;defense response;metabolic process	membrane	RNA binding	Pf00400	79228	ENSG00000131652	THOC6	B2RA85; hsa:79228; Q86W42; Q8NBR1; Q9BTV9	Transport of Mature mRNA derived from an Intron-Containing Transcript; mRNA 3'-end processing; RNA Polymerase II Transcription Termination		3	0	100	100	100	0.821	1.155	1.406	6.64	6.64	6.64	-0.28	0.21	0.49	1e-17	1e-17	1e-17	0.971106	0.51846	0.626536	2.25143e-17	2.43314e-17	2.35969e-17	0.997943
FALSE	Low	Master Protein	Q5VZ46	Uncharacterized protein KIAA1614 [OS=Homo sapiens]	0.058	1.51	2	1	3	1	1190	126.5	8.82	0	1	cell differentiation;cell growth;metabolic process	cytoplasm;cytoskeleton;membrane;nucleus	structural molecule activity	Pf15737	57710	ENSG00000135835	KIAA1614	hsa:57710; Q5VZ45; Q5VZ46; Q9HCF8			0	0	0.01	0.01	0.01				-6.64	-6.64	-6.64				1e-17	1e-17	1e-17				2.25143e-17	2.43314e-17	2.35969e-17
FALSE	High	Master Protein	P43897	Elongation factor Ts, mitochondrial [OS=Homo sapiens]	0	26.458	27	4	21	4	325	35.4	8.38	52.81	4	cell organization and biogenesis;cellular homeostasis;metabolic process	endosome;membrane	RNA binding	Pf00889	10102	ENSG00000123297	TSFM	B4E391; F5H2T7; hsa:10102; P43897; Q561V7; Q8TBC2; Q9UQK0	Mitochondrial translation elongation		1	0	100	100	100	0.134	0.429	3.195	6.64	6.64	6.64	-2.9	-1.22	1.68	1e-17	1e-17	1e-17	4.70031e-05	0.00759179	0.0154753	2.25143e-17	2.43314e-17	2.35969e-17	0.000494391
FALSE	High	Master Protein	O60828	Polyglutamine-binding protein 1 [OS=Homo sapiens]	0	18.228	38	4	12	4	265	30.5	6.33	27.23	4	cell growth;cellular component movement;cellular homeostasis;coagulation;defense response;metabolic process	membrane;nucleus	RNA binding;structural molecule activity		10084	ENSG00000102103	PQBP1	C9JQA1; hsa:10084; O60828; Q4VY25; Q4VY26; Q4VY27; Q4VY29; Q4VY30; Q4VY34; Q4VY35; Q4VY36; Q4VY37; Q4VY38; Q9GZP2; Q9GZU4; Q9GZZ4	mRNA Splicing - Major Pathway		1	0	100	100	100	0.767	1.166	1.52	6.64	6.64	6.64	-0.38	0.22	0.6	1e-17	1e-17	1e-17	0.925	0.510091	0.502029	2.25143e-17	2.43314e-17	2.35969e-17	0.992849
FALSE	High	Master Protein	Q53EU6	Glycerol-3-phosphate acyltransferase 3 [OS=Homo sapiens]	0.001	4.54	3	1	1	1	434	48.7	8.87	2.52	1	cellular homeostasis;metabolic process	cytoskeleton;extracellular	structural molecule activity	Pf01553	84803	ENSG00000138678	GPAT3	hsa:84803; Q53EU6; Q68CJ4; Q6GPI6; Q96NA3	Synthesis of PA	HIF1A and PPARG regulation of glycolysis; Congenital generalized lipodystrophy (CGL)	3	0	100	100	100	0.786	0.782	0.995	6.64	6.64	6.64	-0.35	-0.35	-0.01	1e-17	1e-17	1e-17	0.950928	0.480676	0.549361	2.25143e-17	2.43314e-17	2.35969e-17	0.996316
FALSE	Medium	Master Protein	P20585	DNA mismatch repair protein Msh3 [OS=Homo sapiens]	0.024	1.925	2	1	2	1	1137	127.3	8.02	0	1	cell differentiation;cell growth;cell proliferation;cellular homeostasis;coagulation;defense response;metabolic process	membrane;nucleus	RNA binding;structural molecule activity	Pf00488, Pf01624, Pf05188, Pf05192	4437	ENSG00000113318	MSH3	A1L480; A1L482; A6NMM6; hsa:4437; P20585; Q6PJT5; Q86UQ6; Q92867	Mismatch repair (MMR) directed by MSH2:MSH3 (MutSbeta); Defective Mismatch Repair Associated With MSH3; Defective Mismatch Repair Associated With MSH2	Chromosomal and microsatellite instability in colorectal cancer ; DNA repair pathways, full network	5	0	100	100	100	0.448	0.77	1.721	6.64	6.64	6.64	-1.16	-0.38	0.78	1e-17	1e-17	1e-17	0.445415	0.490267	0.582068	2.25143e-17	2.43314e-17	2.35969e-17	0.881249
FALSE	High	Master Protein	Q14573	Inositol 1,4,5-trisphosphate receptor type 3 [OS=Homo sapiens]	0.002	3.309	1	1	3	1	2671	303.9	6.48	4.98	1	conjugation;development;metabolic process	cytoplasm;cytoskeleton;cytosol;extracellular;membrane;nucleus	catalytic activity;structural molecule activity	Pf00520, Pf01365, Pf02815, Pf08454, Pf08709	3710	ENSG00000096433	ITPR3	hsa:3710; Q14573; Q14649; Q5TAQ2	Role of phospholipids in phagocytosis; Ca2+ pathway; Ion homeostasis; FCGR3A-mediated IL10 synthesis; FCERI mediated Ca+2 mobilization; Antigen activates B Cell Receptor (BCR) leading to generation of second messengers; Sensory perception of sweet, bitter, and umami (glutamate) taste; Glucagon-like Peptide-1 (GLP1) regulates insulin secretion; PLC beta mediated events; VEGFR2 mediated cell prolif…	Alzheimer's disease and miRNA effects; Myometrial relaxation and contraction pathways; MFAP5-mediated ovarian cancer cell motility and invasiveness; GPR40 pathway; Vitamin D-sensitive calcium signaling in depression; Airway smooth muscle cell contraction; Malignant pleural mesothelioma; Alzheimer's disease; Calcium regulation in cardiac cells	24	0	100	100		0.704	0.01	0.01	6.64	6.64		-0.51	-6.64	-6.64	1e-17	1e-17		0.991904	1e-17	1e-17	2.25143e-17	2.43314e-17		0.999445
FALSE	High	Master Protein	Q9H6T0	Epithelial splicing regulatory protein 2 [OS=Homo sapiens]	0	28.629	17	6	29	5	727	78.4	6.71	65.43	6	cellular component movement;cellular homeostasis;defense response;metabolic process	membrane;nucleus	RNA binding		80004	ENSG00000103067	ESRP2	hsa:80004; Q8N6H8; Q8WZ15; Q9H6I4; Q9H6T0	FGFR2 alternative splicing		1	1	100	100	100	0.948	1.104	1.165	6.64	6.64	6.64	-0.08	0.14	0.22	1e-17	1e-17	1e-17	0.826801	0.601561	0.865556	2.25143e-17	2.43314e-17	2.35969e-17	0.985798
FALSE	High	Master Protein	P62306	Small nuclear ribonucleoprotein F [OS=Homo sapiens]	0	6.644	15	1	9	1	86	9.7	4.67	26.11	1	cell growth;cellular component movement;cellular homeostasis	cytosol;membrane;nucleus	RNA binding	Pf01423	6636	ENSG00000139343	SNRPF	A2VCR2; B2R498; hsa:6636; P62306; Q15356; Q6IBQ1; Q6P4I0	snRNP Assembly; mRNA Splicing - Major Pathway; RNA Polymerase II Transcription Termination; mRNA Splicing - Minor Pathway; SLBP independent Processing of Histone Pre-mRNAs; SLBP Dependent Processing of Replication-Dependent Histone Pre-mRNAs	mRNA processing	7	0	100	100	100	0.976	1.162	1.19	6.64	6.64	6.64	-0.04	0.22	0.25	1e-17	1e-17	1e-17	0.596452	0.635751	0.931679	2.25143e-17	2.43314e-17	2.35969e-17	0.947989
FALSE	High	Master Protein	Q5JSZ5	Protein PRRC2B [OS=Homo sapiens]	0.001	4.247	1	1	3	1	2229	242.8	8.34	7.41	1	metabolic process			Pf07001	84726	ENSG00000288701	PRRC2B	hsa:84726; O60270; Q5JSZ5; Q5JSZ7; Q66VZ2; Q68CR0; Q96EI9; Q9H683			0	0	100		100	0.01	0.779	100	6.64		6.64	-6.64	-0.36	6.64	1e-17		1e-17	1e-17	0.559004	1e-17	2.25143e-17		2.35969e-17	1.33839e-16
FALSE	High	Master Protein	P23258	Tubulin gamma-1 chain [OS=Homo sapiens]	0	20.942	35	8	22	8	451	51.1	6.14	24.85	8	cell differentiation;cell growth	cytosol;endoplasmic reticulum;membrane;mitochondrion;nucleus	motor activity;structural molecule activity	Pf00091, Pf03953	7283	ENSG00000131462	TUBG1	hsa:7283; P23258; Q53X79; Q9BW59	Recruitment of NuMA to mitotic centrosomes; Regulation of PLK1 Activity at G2/M Transition; AURKA Activation by TPX2; Loss of Nlp from mitotic centrosomes; Recruitment of mitotic centrosome proteins and complexes; Anchoring of the basal body to the plasma membrane		7	0	100	100	100	0.322	0.838	2.606	6.64	6.64	6.64	-1.64	-0.25	1.38	1e-17	1e-17	1e-17	0.0693014	0.627978	0.0705802	2.25143e-17	2.43314e-17	2.35969e-17	0.349172
FALSE	High	Master Protein	Q9H0R8	Gamma-aminobutyric acid receptor-associated protein-like 1 [OS=Homo sapiens]	0	5.706	15	1	9	1	117	14	8.73	16.41	1	cell growth;cellular homeostasis;coagulation	cytoplasm;cytoskeleton;cytosol;endoplasmic reticulum;extracellular;mitochondrion;nucleus	antioxidant activity;motor activity;structural molecule activity	Pf02991	23710	ENSG00000139112	GABARAPL1	B4E0Y7; hsa:23710; Q6FIE6; Q9H0R8	Macroautophagy		1	0	100	100	100	0.955	1.538	1.609	6.64	6.64	6.64	-0.07	0.62	0.69	1e-17	1e-17	1e-17	0.580927	0.173289	0.69762	2.25143e-17	2.43314e-17	2.35969e-17	0.940705
FALSE	High	Master Protein	P05543	Thyroxine-binding globulin [OS=Homo sapiens]	0	19.368	7	3	17	3	415	46.3	6.3	38.91	3	conjugation;metabolic process	cell surface	DNA binding	Pf00079	6906	ENSG00000123561	SERPINA7	D3DUX1; hsa:6906; P05543			0	0	0.01	0.036	0.054	5.816	8.628	1.484	-6.64	-4.78	-4.21	2.54	3.11	0.57	1e-17	4.50485e-10	1.00365e-09	3.75959e-05	4.57689e-11	0.541553	2.25143e-17	1.0885e-09	2.32364e-09	0.00039933
FALSE	High	Master Protein	Q92925	SWI/SNF-related matrix-associated actin-dependent regulator of chromatin subfamily D member 2 [OS=Homo sapiens]	0	14.341	9	3	16	2	531	58.9	9.64	24.92	3	cell growth;metabolic process	membrane	structural molecule activity	Pf02201	6603	ENSG00000108604	SMARCD2	A5PLL5; A6NNQ7; B4DV56; B4E1R6; hsa:6603; Q7L2I6; Q92925; Q9UHZ1	RMTs methylate histone arginines; RUNX1 interacts with co-factors whose precise effect on RUNX1 targets is not known	Tumor suppressor activity of SMARCB1; Thermogenesis	4	0	100	100	100	0.659	0.705	1.07	6.64	6.64	6.64	-0.6	-0.5	0.1	1e-17	1e-17	1e-17	0.826669	0.342253	0.752929	2.25143e-17	2.43314e-17	2.35969e-17	0.985798
FALSE	High	Master Protein	Q8NBQ5	Estradiol 17-beta-dehydrogenase 11 [OS=Homo sapiens]	0	10.479	10	2	10	2	300	32.9	9.07	10.85	2	cellular homeostasis	cytosol;extracellular;nucleus	structural molecule activity	Pf00106	51170	ENSG00000198189	HSD17B11	hsa:51170; Q8NBQ5; Q96HF6; Q9UKU4	Estrogen biosynthesis		1	0	100	100	100	0.827	0.692	0.837	6.64	6.64	6.64	-0.27	-0.53	-0.26	1e-17	1e-17	1e-17	0.864939	0.325784	0.395373	2.25143e-17	2.43314e-17	2.35969e-17	0.986127
FALSE	High	Master Protein	Q4G0J3	La-related protein 7 [OS=Homo sapiens]	0.001	5.064	6	2	3	2	582	66.9	9.55	2.05	2	cellular component movement;cellular homeostasis;metabolic process	cytosol;membrane;nucleus	RNA binding	Pf00076, Pf05383, Pf08777	51574	ENSG00000174720	LARP7	B2ZHN6; hsa:51574; Q3B7A9; Q4G0J3; Q9P1S7; Q9Y3Z8		VEGFA-VEGFR2 signaling pathway	1	0	100	100	100	1.694	0.267	0.158	6.64	6.64	6.64	0.76	-1.9	-2.66	1e-17	1e-17	1e-17	0.10686	0.000262219	3.81806e-05	2.25143e-17	2.43314e-17	2.35969e-17	0.460311
FALSE	High	Master Protein	Q8N3C0	Activating signal cointegrator 1 complex subunit 3 [OS=Homo sapiens]	0	10.482	3	4	10	4	2202	251.3	7.09	9.58	4	cell differentiation;cell growth;cell proliferation;cellular homeostasis;coagulation	cytosol;membrane	structural molecule activity	Pf00270, Pf00271, Pf02889	10973	ENSG00000112249	ASCC3	E7EW23; hsa:10973; O43738; Q4G1A0; Q5VTN2; Q8N3C0; Q9H1I9; Q9H5A2; Q9NTR0	ALKBH3 mediated reversal of alkylation damage	Mesodermal commitment pathway; VEGFA-VEGFR2 signaling pathway	3	0	100	100	100	0.398	1.352	3.394	6.64	6.64	6.64	-1.33	0.44	1.76	1e-17	1e-17	1e-17	0.261208	0.363759	0.0406651	2.25143e-17	2.43314e-17	2.35969e-17	0.733523
FALSE	Medium	Master Protein	O43674	NADH dehydrogenase [ubiquinone] 1 beta subcomplex subunit 5, mitochondrial [OS=Homo sapiens]	0.044	1.671	11	1	3	1	189	21.7	9.63	0	1	cell growth;cellular homeostasis;conjugation	cytoskeleton;endosome;membrane	catalytic activity	Pf09781	4711	ENSG00000136521	NDUFB5	hsa:4711; O43674; Q561V6	Complex I biogenesis	Electron transport chain: OXPHOS system in mitochondria; Nonalcoholic fatty liver disease; Oxidative phosphorylation	5	0	100	100	100	0.385	0.796	2.068	6.64	6.64	6.64	-1.38	-0.33	1.05	1e-17	1e-17	1e-17	0.249489	0.634349	0.347729	2.25143e-17	2.43314e-17	2.35969e-17	0.719987
FALSE	High	Master Protein	Q9BRP1	Programmed cell death protein 2-like [OS=Homo sapiens]	0	8.186	4	1	8	1	358	39.4	4.86	12.02	1	cell differentiation	nucleus		Pf04194	84306	ENSG00000126249	PDCD2L	hsa:84306; Q9BRP1			0	0	100	100	100	0.344	1.429	4.15	6.64	6.64	6.64	-1.54	0.52	2.05	1e-17	1e-17	1e-17	0.202921	0.226921	0.0187815	2.25143e-17	2.43314e-17	2.35969e-17	0.659232
FALSE	High	Master Protein	Q96E11	Ribosome-recycling factor, mitochondrial [OS=Homo sapiens]	0	13.119	13	2	10	2	262	29.3	9.79	29.8	2	cell growth;cell organization and biogenesis;cellular homeostasis	endosome	protein binding	Pf01765	92399	ENSG00000148187	MRRF	A8K6D8; A8K6Z4; B7Z4X5; B7Z6P7; hsa:92399; Q5RKT1; Q5T7T0; Q5T7T1; Q5T7T2; Q5T7T3; Q5T7T4; Q5T7T5; Q96E11	Mitochondrial translation termination		1	0	100	100	100	0.722	0.859	1.19	6.64	6.64	6.64	-0.47	-0.22	0.25	1e-17	1e-17	1e-17	0.796661	0.715536	0.958645	2.25143e-17	2.43314e-17	2.35969e-17	0.985495
FALSE	High	Master Protein	Q9UBI6	Guanine nucleotide-binding protein G(I)/G(S)/G(O) subunit gamma-12 [OS=Homo sapiens]	0.001	4.085	15	1	3	1	72	8	8.97	7.83	1	defense response;development;metabolic process	cytoplasm;cytoskeleton;endoplasmic reticulum;nucleus	structural molecule activity	Pf00631	55970	ENSG00000172380	GNG12	hsa:55970; Q69YP5; Q9BRV5; Q9UBI6	G alpha (q) signalling events; Extra-nuclear estrogen signaling; Ca2+ pathway; G alpha (i) signalling events; G alpha (z) signalling events; ADP signalling through P2Y purinoceptor 12; G alpha (s) signalling events; GPER1 signaling; ADORA2B mediated anti-inflammatory cytokines production; Adrenaline,noradrenaline inhibits insulin secretion; Cooperation of PDCL (PhLP1) and TRiC/CCT in G-protein be…	Myometrial relaxation and contraction pathways; G protein signaling pathways; MAPK signaling pathway; Chemokine signaling pathway; Focal adhesion: PI3K-Akt-mTOR-signaling pathway; PI3K-Akt signaling pathway; Ras signaling; Regulation of actin cytoskeleton; Calcium regulation in cardiac cells	37	0	100	100	100	1.705	1.579	0.926	6.64	6.64	6.64	0.77	0.66	-0.11	1e-17	1e-17	1e-17	0.104984	0.172952	0.449361	2.25143e-17	2.43314e-17	2.35969e-17	0.457506
FALSE	Low	Master Protein	Q08378	Golgin subfamily A member 3 [OS=Homo sapiens]	0.052	1.579	1	1	1	1	1498	167.3	5.44	1.71	1	metabolic process	cytoskeleton;cytosol;extracellular;membrane			2802	ENSG00000090615	GOLGA3	A5PKX6; hsa:2802; O43241; Q08378; Q6P9C7; Q86XW3; Q8TDA9; Q8WZA3	RND2 GTPase cycle		1	0	100	100	100	0.84	1.185	1.41	6.64	6.64	6.64	-0.25	0.25	0.5	1e-17	1e-17	1e-17	0.931135	0.476085	0.633463	2.25143e-17	2.43314e-17	2.35969e-17	0.992849
FALSE	High	Master Protein	Q9NVP2	Histone chaperone ASF1B [OS=Homo sapiens]	0.006	2.828	14	1	5	1	202	22.4	4.56	4.56	1	cell growth;defense response;metabolic process	membrane;nucleus	structural molecule activity	Pf04729	55723	ENSG00000105011; ENSG00000288210	ASF1B	hsa:55723; Q53G51; Q9NVP2; Q9NVZ0			0	0	100		100	0.01	1.013	100	6.64		6.64	-6.64	0.02	6.64	1e-17		1e-17	1e-17	0.88564	1e-17	2.25143e-17		2.35969e-17	1.33839e-16
FALSE	High	Master Protein	Q5RKV6	Exosome complex component MTR3 [OS=Homo sapiens]	0	11.583	16	2	14	2	272	28.2	6.28	41.61	2	cell proliferation;cellular component movement;cellular homeostasis;defense response;metabolic process	cytosol;membrane;mitochondrion;nucleus		Pf01138	118460	ENSG00000223496	EXOSC6	hsa:118460; Q5RKV6	Major pathway of rRNA processing in the nucleolus and cytosol; ATF4 activates genes in response to endoplasmic reticulum stress; KSRP (KHSRP) binds and destabilizes mRNA; Tristetraprolin (TTP, ZFP36) binds and destabilizes mRNA; Butyrate Response Factor 1 (BRF1) binds and destabilizes mRNA; mRNA decay by 3' to 5' exoribonuclease		6	0	100	100	100	0.701	1.303	1.858	6.64	6.64	6.64	-0.51	0.38	0.89	1e-17	1e-17	1e-17	0.833709	0.306751	0.25682	2.25143e-17	2.43314e-17	2.35969e-17	0.985798
FALSE	Medium	Master Protein	P29218	Inositol monophosphatase 1 [OS=Homo sapiens]	0.046	1.643	4	1	1	1	277	30.2	5.26	1.98	1	cellular homeostasis;development	cytosol;nucleus	structural molecule activity	Pf00459	3612	ENSG00000133731	IMPA1	B2R733; B4DLN3; B7Z6Q4; hsa:3612; J3KQT7; P29218; Q9UK71	Synthesis of IP2, IP, and Ins in the cytosol		1	0	100	100	100	0.86	0.972	1.131	6.64	6.64	6.64	-0.22	-0.04	0.18	1e-17	1e-17	1e-17	0.781238	0.998343	0.842552	2.25143e-17	2.43314e-17	2.35969e-17	0.983539
FALSE	High	Master Protein	Q10570	Cleavage and polyadenylation specificity factor subunit 1 [OS=Homo sapiens]	0	11.058	3	3	17	3	1443	160.8	6.4	28	3	cellular component movement;cellular homeostasis	membrane	RNA binding;structural molecule activity	Pf03178, Pf10433	29894	ENSG00000071894; ENSG00000285049	CPSF1	hsa:29894; Q10570; Q96AF0	mRNA 3'-end processing; RNA Polymerase II Transcription Termination; mRNA Splicing - Major Pathway; Transport of Mature mRNA Derived from an Intronless Transcript; tRNA processing in the nucleus; Processing of Intronless Pre-mRNAs	mRNA processing	7	0	100	100	100	0.524	0.484	0.924	6.64	6.64	6.64	-0.93	-1.05	-0.11	1e-17	1e-17	1e-17	0.466912	0.0403801	0.522586	2.25143e-17	2.43314e-17	2.35969e-17	0.895945
FALSE	High	Master Protein	Q9UKZ1	CCR4-NOT transcription complex subunit 11 [OS=Homo sapiens]	0	23.999	20	5	29	5	510	55.2	6.4	32.02	5	metabolic process	cytosol;membrane;nucleus		Pf10155	55571	ENSG00000158435	CNOT11	hsa:55571; Q6P2M9; Q8N681; Q9UKZ1	TP53 regulates transcription of additional cell cycle genes whose exact role in the p53 pathway remain uncertain; Deadenylation of mRNA		2	0	100	100	100	0.5	0.976	1.952	6.64	6.64	6.64	-1	-0.03	0.97	1e-17	1e-17	1e-17	0.38039	0.984898	0.287408	2.25143e-17	2.43314e-17	2.35969e-17	0.845898
FALSE	Medium	Master Protein	Q86VR2	Reticulophagy regulator 3 [OS=Homo sapiens]	0.019	2.115	7	1	1	1	466	51.4	4.97	0	1	cell growth;cellular homeostasis;metabolic process	cytoskeleton;nucleus			162427	ENSG00000141699	RETREG3	B3KR75; hsa:162427; Q86VR2			0	0	100	100	100	2.87	1.303	0.454	6.64	6.64	6.64	1.52	0.38	-1.14	1e-17	1e-17	1e-17	0.0151645	0.37451	0.0218066	2.25143e-17	2.43314e-17	2.35969e-17	0.107118
FALSE	Low	Master Protein	Q16595	Frataxin, mitochondrial [OS=Homo sapiens]	0.054	1.555	8	1	1	1	210	23.1	8.69	0	1	cell growth;cell organization and biogenesis;cellular homeostasis;coagulation;conjugation;defense response;metabolic process	cytosol;endosome	structural molecule activity	Pf01491	2395	ENSG00000165060	FXN	A8MXJ6; C9JJ89; hsa:2395; O15545; O95656; Q15294; Q16595; Q5VZ01	Mitochondrial protein import; Mitochondrial iron-sulfur cluster biogenesis		2	0	100	100	100	1.762	1.129	0.641	6.64	6.64	6.64	0.82	0.18	-0.64	1e-17	1e-17	1e-17	0.0929223	0.658154	0.138453	2.25143e-17	2.43314e-17	2.35969e-17	0.423291
FALSE	Medium	Master Protein	O95671	Probable bifunctional dTTP/UTP pyrophosphatase/methyltransferase protein [OS=Homo sapiens]	0.013	2.342	3	1	3	1	621	68.8	6.07	2.14	1	cellular homeostasis	cytosol	structural molecule activity	Pf00891, Pf02545, Pf16864	8623	ENSG00000169093	ASMTL	B4DX75; F5GXH4; hsa:8623; J3JS33; O95671; Q5JQ53; Q8NBH5; Q96G02; Q9BUL6			0	0	100	100	100	0.464	0.697	1.502	6.64	6.64	6.64	-1.11	-0.52	0.59	1e-17	1e-17	1e-17	0.453472	0.388465	0.77942	2.25143e-17	2.43314e-17	2.35969e-17	0.888096
FALSE	Medium	Master Protein	Q99757	Thioredoxin, mitochondrial [OS=Homo sapiens]	0.013	2.284	15	1	3	1	166	18.4	8.29	2.77	1	cellular homeostasis;coagulation;metabolic process	endosome;membrane;nucleus	structural molecule activity	Pf00085	25828	ENSG00000100348	TXN2	hsa:25828; Q5JZA0; Q6FH60; Q99757; Q9UH29	Detoxification of Reactive Oxygen Species; Degradation of cysteine and homocysteine	Oxidative stress response	3	0	100	100	100	0.782	0.96	1.229	6.64	6.64	6.64	-0.36	-0.06	0.3	1e-17	1e-17	1e-17	0.983481	0.945104	0.947462	2.25143e-17	2.43314e-17	2.35969e-17	0.997943
FALSE	High	Master Protein	Q99570	Phosphoinositide 3-kinase regulatory subunit 4 [OS=Homo sapiens]	0	6.978	3	3	5	3	1358	153	7.17	4.31	3	cell organization and biogenesis;cellular homeostasis;coagulation;conjugation;metabolic process	cytoskeleton;cytosol;endoplasmic reticulum;mitochondrion;nucleus	signal transducer activity;structural molecule activity	Pf00069, Pf00400	30849	ENSG00000196455	PIK3R4	hsa:30849; Q2TBF4; Q99570	PI3K Cascade; Macroautophagy; Synthesis of PIPs at the Golgi membrane; RHO GTPases Activate NADPH Oxidases; Synthesis of PIPs at the early endosome membrane; Synthesis of PIPs at the late endosome membrane; Translation of Replicase and Assembly of the Replication Transcription Complex; Translation of Replicase and Assembly of the Replication Transcription Complex; Toll Like Receptor 9 (TLR9) Casc…	Alzheimer's disease and miRNA effects; Angiopoietin-like protein 8 regulatory pathway; Focal adhesion: PI3K-Akt-mTOR-signaling pathway; Neural crest cell migration during development; Neural crest cell migration in cancer; Neurodegeneration with brain iron accumulation (NBIA) subtypes pathway; Osteoblast differentiation and related diseases; Ciliopathies; Insulin signaling; Autophagy; Regulation …	22	0	100	100	100	0.571	0.943	1.651	6.64	6.64	6.64	-0.81	-0.09	0.72	1e-17	1e-17	1e-17	0.714661	0.985242	0.627562	2.25143e-17	2.43314e-17	2.35969e-17	0.976757
FALSE	Medium	Master Protein	Q96BJ8	Engulfment and cell motility protein 3 [OS=Homo sapiens]	0.013	2.28	2	1	2	1	720	81.4	6.3	0	1	cell growth;conjugation;metabolic process	nucleus	structural molecule activity	Pf04727, Pf11841, Pf16457	79767	ENSG00000102890	ELMO3	B4DV86; hsa:79767; Q96BJ8; Q9H8A5			0	0	100	100	100	1.016	1.153	1.136	6.64	6.64	6.64	0.02	0.21	0.18	1e-17	1e-17	1e-17	0.507459	0.588192	0.723597	2.25143e-17	2.43314e-17	2.35969e-17	0.911038
FALSE	High	Master Protein	Q6PJG6	BRCA1-associated ATM activator 1 [OS=Homo sapiens]	0	7.07	8	3	5	3	821	88.1	5.27	2.4	3	cell differentiation;cellular homeostasis;coagulation;metabolic process	membrane;nucleus		Pf02985	221927	ENSG00000106009	BRAT1	A4D200; C9JY24; hsa:221927; Q6PJG6; Q8IW85; Q8IZ43; Q8WVR8; Q96IV9; Q9H7J8; Q9UFA3			0	0	100		100	0.01	1.294	100	6.64		6.64	-6.64	0.37	6.64	1e-17		1e-17	1e-17	0.387738	1e-17	2.25143e-17		2.35969e-17	1.33839e-16
FALSE	High	Master Protein	Q9Y303	N-acetylglucosamine-6-phosphate deacetylase [OS=Homo sapiens]	0	12.783	11	2	10	2	409	43.7	6.7	26.39	2	cellular homeostasis	cytosol	structural molecule activity	Pf01979	51005	ENSG00000162066	AMDHD2	B4DL77; hsa:51005; Q8WV54; Q9Y303	Synthesis of UDP-N-acetyl-glucosamine		1	0	100	100	100	0.759	1.488	1.959	6.64	6.64	6.64	-0.4	0.57	0.97	1e-17	1e-17	1e-17	0.990502	0.232335	0.273753	2.25143e-17	2.43314e-17	2.35969e-17	0.999445
FALSE	Medium	Master Protein	Q9NUU6	Inactive ubiquitin thioesterase OTULINL [OS=Homo sapiens]	0.025	1.891	5	1	1	1	356	42.2	9.29	0	1	cell organization and biogenesis	cytoskeleton;extracellular;membrane;nucleus		Pf16218	54491	ENSG00000145569	OTULINL	hsa:54491; Q53H50; Q9H037; Q9NUU6			0	0	100		100	0.01	0.394	100	6.64		6.64	-6.64	-1.34	6.64	1e-17		1e-17	1e-17	0.0061529	1e-17	2.25143e-17		2.35969e-17	1.33839e-16
FALSE	High	Master Protein	Q9HCE1	Helicase MOV-10 [OS=Homo sapiens]	0	11.275	6	4	6	4	1003	113.6	8.82	13.47	4	coagulation;metabolic process	cytosol;membrane;nucleus	RNA binding;structural molecule activity	Pf13087, Pf13604	4343	ENSG00000155363	MOV10	hsa:4343; Q5JR03; Q8TEF0; Q9BSY3; Q9BUJ9; Q9HCE1	MAPK6/MAPK4 signaling; Ca2+ pathway; TP53 Regulates Metabolic Genes; Regulation of MECP2 expression and activity; NR1H3 & NR1H2 regulate gene expression linked to cholesterol transport and efflux; Estrogen-dependent gene expression; Oncogene Induced Senescence; Oxidative Stress Induced Senescence; Pre-NOTCH Transcription and Translation; RUNX1 regulates genes involved in megakaryocyte differentia…	VEGFA-VEGFR2 signaling pathway	16	0	100	100	100	0.26	0.807	3.106	6.64	6.64	6.64	-1.94	-0.31	1.63	1e-17	1e-17	1e-17	0.0224069	0.532069	0.047487	2.25143e-17	2.43314e-17	2.35969e-17	0.149253
FALSE	High	Master Protein	Q8N3F8	MICAL-like protein 1 [OS=Homo sapiens]	0	16.996	10	5	30	5	863	93.4	7.25	36.52	5	cell growth;conjugation;defense response;metabolic process	cytoskeleton;mitochondrion	structural molecule activity	Pf00307, Pf00412, Pf12130	85377	ENSG00000100139	MICALL1	hsa:85377; Q5TI16; Q7RTP5; Q8N3F8; Q8N3N8; Q9BVL9; Q9BY92; Q9UH43; Q9UH44; Q9UH45			0	0	100	100	100	0.55	0.836	1.519	6.64	6.64	6.64	-0.86	-0.26	0.6	1e-17	1e-17	1e-17	0.316965	0.630248	0.426377	2.25143e-17	2.43314e-17	2.35969e-17	0.792505
FALSE	High	Master Protein	P15509	Granulocyte-macrophage colony-stimulating factor receptor subunit alpha [OS=Homo sapiens]	0.003	3.2	4	1	8	1	400	46.2	7.75	10.11	1	development	cell surface;cytoplasm;cytoskeleton;nucleus	structural molecule activity	Pf09240, Pf18611	1438	ENSG00000198223	CSF2RA	A7J003; A8KAM1; B4DW68; hsa:1438; J3JS76; J3JS77; O00207; P15509; Q14429; Q14430; Q14431; Q16564	Interleukin receptor SHC signaling; RAF/MAP kinase cascade; Surfactant metabolism; Defective CSF2RB causes SMDP5; Defective CSF2RA causes SMDP4		6	0	100	100	100	0.714	0.735	1.03	6.64	6.64	6.64	-0.49	-0.44	0.04	1e-17	1e-17	1e-17	0.956492	0.499311	0.638487	2.25143e-17	2.43314e-17	2.35969e-17	0.997943
FALSE	High	Master Protein	Q969X6	U3 small nucleolar RNA-associated protein 4 homolog [OS=Homo sapiens]	0.001	4.82	2	1	8	1	686	76.8	8.85	16.27	1	cellular component movement;cellular homeostasis;metabolic process	membrane;nucleus		Pf00400	84916	ENSG00000141076; ENSG00000262788	UTP4	hsa:84916; Q8NCD9; Q8TF14; Q969X6; Q96SP0; Q96SR9; Q96SZ9; Q96T13; Q9BWK6	Major pathway of rRNA processing in the nucleolus and cytosol; rRNA modification in the nucleus and cytosol		2	0	100	100	100	0.905	2.106	2.326	6.64	6.64	6.64	-0.14	1.07	1.22	1e-17	1e-17	1e-17	0.630479	0.0159604	0.186863	2.25143e-17	2.43314e-17	2.35969e-17	0.961062
FALSE	High	Master Protein	Q8TCD5	5'(3')-deoxyribonucleotidase, cytosolic type [OS=Homo sapiens]	0	20.986	21	2	26	2	201	23.4	6.64	66.22	2	cellular homeostasis	cytosol;membrane;nucleus	structural molecule activity	Pf06941	30833	ENSG00000125458	NT5C	hsa:30833; Q8TCD5; Q96HS6; Q9NP82	Purine catabolism; Pyrimidine catabolism	Pyrimidine metabolism	3	0	100	100	100	0.991	1.351	1.364	6.64	6.64	6.64	-0.01	0.43	0.45	1e-17	1e-17	1e-17	0.606392	0.368333	0.876156	2.25143e-17	2.43314e-17	2.35969e-17	0.951173
FALSE	Medium	Master Protein	Q7L3T8	Probable proline--tRNA ligase, mitochondrial [OS=Homo sapiens]	0.023	2.012	5	1	2	1	475	53.2	8.1	0	1	cell organization and biogenesis;cellular component movement;cellular homeostasis	endosome	structural molecule activity	Pf00587, Pf03129	25973	ENSG00000162396	PARS2	A8K0W4; hsa:25973; Q7L3T8; Q9H6S5; Q9UFT1	Mitochondrial tRNA aminoacylation		1	0	100		100	0.01	0.368	100	6.64		6.64	-6.64	-1.44	6.64	1e-17		1e-17	1e-17	0.00927465	1e-17	2.25143e-17		2.35969e-17	1.33839e-16
FALSE	High	Master Protein	Q9Y4E1	WASH complex subunit 2C [OS=Homo sapiens]	0	7.173	3	2	9	2	1320	144.8	4.79	13.2	2	cell growth;conjugation;metabolic process	cytoplasm;cytoskeleton;cytosol;membrane;mitochondrion;nucleus	structural molecule activity	Pf15255	253725	ENSG00000172661	WASHC2C	B4DZQ6; B9EK53; F5H0J6; F5H871; hsa:253725; Q5SQU4; Q5SQU5; Q7L521; Q9UG79; Q9Y4E1			0	0	100	100	100	0.459	2.148	4.685	6.64	6.64	6.64	-1.12	1.1	2.23	1e-17	1e-17	1e-17	0.440271	0.020873	0.0124868	2.25143e-17	2.43314e-17	2.35969e-17	0.879524
FALSE	High	Master Protein	Q9NWU2	Glucose-induced degradation protein 8 homolog [OS=Homo sapiens]	0.002	3.456	11	1	5	1	228	26.7	4.97	2.22	1	cell death;cell organization and biogenesis;cellular homeostasis;development;metabolic process	cytosol;membrane;nucleus	structural molecule activity	Pf08513, Pf10607	54994	ENSG00000101193	GID8	E1P5I3; hsa:54994; Q8N5M5; Q9NWU2		Ciliary landscape	1	0	100	100	100	0.686	2.21	3.222	6.64	6.64	6.64	-0.54	1.14	1.69	1e-17	1e-17	1e-17	0.972526	0.019573	0.0607732	2.25143e-17	2.43314e-17	2.35969e-17	0.997943
FALSE	High	Master Protein	Q9Y3T9	Nucleolar complex protein 2 homolog [OS=Homo sapiens]	0	7.603	3	2	4	2	749	84.9	5.62	5.46	2	cell growth;metabolic process	cytosol;membrane;nucleus	structural molecule activity	Pf03715	26155	ENSG00000188976	NOC2L	hsa:26155; Q5SVA3; Q9BTN6; Q9Y3T9	Regulation of TP53 Activity through Phosphorylation		1	0	100	100	100	0.577	1.249	2.165	6.64	6.64	6.64	-0.79	0.32	1.11	1e-17	1e-17	1e-17	0.593659	0.481677	0.267942	2.25143e-17	2.43314e-17	2.35969e-17	0.947297
FALSE	High	Master Protein	O14657	Torsin-1B [OS=Homo sapiens]	0.001	4.849	9	2	3	2	336	38	8.54	0	2	cell growth;coagulation;metabolic process	cytoskeleton;extracellular;membrane	motor activity;structural molecule activity	Pf06309	27348	ENSG00000136816	TOR1B	hsa:27348; O14657	Cargo recognition for clathrin-mediated endocytosis		1	0	100	100	100	0.851	1.058	1.244	6.64	6.64	6.64	-0.23	0.08	0.31	1e-17	1e-17	1e-17	0.840368	0.852274	0.971815	2.25143e-17	2.43314e-17	2.35969e-17	0.985798
FALSE	High	Master Protein	Q9BV23	Monoacylglycerol lipase ABHD6 [OS=Homo sapiens]	0	13.468	15	3	5	3	337	38.3	8.41	5.85	3	cellular homeostasis;metabolic process	cytoplasm;cytoskeleton;endosome;mitochondrion;nucleus	structural molecule activity	Pf00561	57406	ENSG00000163686	ABHD6	B2R7Y9; hsa:57406; Q6ZMF7; Q9BV23	Arachidonate production from DAG		1	0	100	100	100	0.471	0.601	1.275	6.64	6.64	6.64	-1.09	-0.74	0.35	1e-17	1e-17	1e-17	0.302045	0.154275	0.968471	2.25143e-17	2.43314e-17	2.35969e-17	0.777104
FALSE	High	Master Protein	Q86U38	Nucleolar protein 9 [OS=Homo sapiens]	0	6.951	11	3	3	3	636	69.4	7.28	0	3	cellular component movement;cellular homeostasis;conjugation	membrane;nucleus			161424	ENSG00000196943; ENSG00000285326	NOP9	A8MY76; hsa:161424; Q86U38; Q8IVF0; Q8TBS6			0	0	100	100	100	0.307	1.127	3.666	6.64	6.64	6.64	-1.7	0.17	1.87	1e-17	1e-17	1e-17	0.116288	0.661482	0.0212422	2.25143e-17	2.43314e-17	2.35969e-17	0.484776
FALSE	High	Master Protein	Q9UPN3	Microtubule-actin cross-linking factor 1, isoforms 1/2/3/5 [OS=Homo sapiens]	0	14.866	1	5	15	5	7388	837.8	5.39	18.72	5	cell death;cell growth;coagulation;conjugation;defense response;development;metabolic process	cytoplasm;cytoskeleton;endoplasmic reticulum;extracellular;nucleus	motor activity;structural molecule activity	Pf00307, Pf00435, Pf00681, Pf02187, Pf13499, Pf17902, Pf18373	23499	ENSG00000127603	MACF1	B1ALC5; E9PJT0; hsa:23499; O75053; Q5VW20; Q8WXY1; Q8WXY2; Q96PK2; Q9H540; Q9UKP0; Q9ULG9; Q9UPN3		Mesodermal commitment pathway; Mesodermal commitment pathway	2	0	100	100	100	0.926	0.563	0.608	6.64	6.64	6.64	-0.11	-0.83	-0.72	1e-17	1e-17	1e-17	0.701914	0.130827	0.138241	2.25143e-17	2.43314e-17	2.35969e-17	0.97309
FALSE	High	Master Protein	Q9H2G4	Testis-specific Y-encoded-like protein 2 [OS=Homo sapiens]	0.007	2.672	1	1	3	1	693	79.4	4.58	3.47	1	cell differentiation;cell growth;metabolic process	membrane;nucleus	RNA binding;structural molecule activity	Pf00956	64061	ENSG00000184205	TSPYL2	hsa:64061; O94799; Q96DG7; Q9BZW6; Q9H2G4	XBP1(S) activates chaperone genes		1	0	0.01	0.043	0.045	100	100	1.055	-6.64	-4.54	-4.47	6.64	6.64	0.08	1e-17	1.58718e-06	4.19538e-06	1e-17	1e-17	0.620673	2.25143e-17	3.67794e-06	9.35039e-06	1.33839e-16
FALSE	High	Master Protein	P51948	CDK-activating kinase assembly factor MAT1 [OS=Homo sapiens]	0.001	4.082	7	1	4	1	309	35.8	6.09	2.43	1	cell differentiation;cell growth;cell proliferation;cellular component movement;cellular homeostasis;coagulation;defense response;metabolic process	membrane	DNA binding;structural molecule activity	Pf06391, Pf17121	4331	ENSG00000020426	MNAT1	G3V1U8; hsa:4331; P51948; Q15817; Q6ICQ7	RUNX1 regulates transcription of genes involved in differentiation of HSCs; RNA Polymerase II Pre-transcription Events; HIV Transcription Initiation; RNA Polymerase II HIV Promoter Escape; RNA Polymerase II Promoter Escape; RNA Polymerase II Transcription Pre-Initiation And Promoter Opening; RNA Polymerase II Transcription Initiation; NoRC negatively regulates rRNA expression; TP53 Regulates Tran…	Eukaryotic transcription initiation; G1 to S cell cycle control; Nucleotide excision repair; DNA repair pathways, full network; Nucleotide excision repair in xeroderma pigmentosum	38	0	100	100	100	0.561	0.951	1.694	6.64	6.64	6.64	-0.83	-0.07	0.76	1e-17	1e-17	1e-17	0.685384	0.99698	0.622891	2.25143e-17	2.43314e-17	2.35969e-17	0.971932
FALSE	High	Master Protein	Q96JB5	CDK5 regulatory subunit-associated protein 3 [OS=Homo sapiens]	0	31.998	17	6	50	6	506	56.9	4.75	99.79	6	cell differentiation;cell growth;cell organization and biogenesis;cellular homeostasis;coagulation;defense response;development;metabolic process	cytosol;endoplasmic reticulum;membrane;nucleus	structural molecule activity	Pf05600	80279	ENSG00000108465	CDK5RAP3	B7Z6N4; D3DTU1; D3DTU2; F5H3I5; hsa:80279; Q53FA2; Q96JB5; Q9H3F8; Q9H8G0; Q9HBR9			0	0	100	100	100	1.003	1.002	0.999	6.64	6.64	6.64	0	0	0	1e-17	1e-17	1e-17	0.71338	0.886923	0.807472	2.25143e-17	2.43314e-17	2.35969e-17	0.9763
FALSE	High	Master Protein	Q9H2W6	39S ribosomal protein L46, mitochondrial [OS=Homo sapiens]	0	8.737	13	2	6	2	279	31.7	7.05	18.74	2		cytoskeleton;endosome;Golgi;membrane;nucleus	structural molecule activity	Pf11788	26589	ENSG00000259494	MRPL46	B2RD75; hsa:26589; Q9H2W6; Q9HBU8	Mitochondrial translation initiation; Mitochondrial translation elongation; Mitochondrial translation termination		3	0	100	100	100	0.562	0.746	1.329	6.64	6.64	6.64	-0.83	-0.42	0.41	1e-17	1e-17	1e-17	0.533717	0.427773	0.915672	2.25143e-17	2.43314e-17	2.35969e-17	0.928848
FALSE	High	Master Protein	Q96FJ2	Dynein light chain 2, cytoplasmic [OS=Homo sapiens]	0	12.97	37	2	10	1	89	10.3	7.37	43.36	2	cell growth;metabolic process	cytoplasm;cytoskeleton;cytosol;endoplasmic reticulum;nucleus	structural molecule activity	Pf01221	140735	ENSG00000264364	DYNLL2	B2R5B4; hsa:140735; Q96FJ2	Separation of Sister Chromatids; MHC class II antigen presentation; HSP90 chaperone cycle for steroid hormone receptors (SHR) in the presence of ligand; Resolution of Sister Chromatid Cohesion; RHO GTPases Activate Formins; EML4 and NUDC in mitotic spindle formation; Amplification of signal from unattached kinetochores via a MAD2 inhibitory signal; HCMV Early Events; Aggrephagy; COPI-mediated ant…	Ciliary landscape; Intraflagellar transport proteins binding to dynein; 3q29 copy number variation syndrome	18	0	100	100	100	1.812	1.101	0.608	6.64	6.64	6.64	0.86	0.14	-0.72	1e-17	1e-17	1e-17	0.0754256	0.730107	0.0501999	2.25143e-17	2.43314e-17	2.35969e-17	0.37095
FALSE	Medium	Master Protein	Q5VUJ6	Leucine-rich repeat and calponin homology domain-containing protein 2 [OS=Homo sapiens]	0.013	2.313	3	1	3	1	765	84.5	6.55	2.68	1				Pf00307, Pf13855	57631	ENSG00000130224	LRCH2	F5H2T1; hsa:57631; Q08AD5; Q5VUJ6; Q9HA88; Q9P233			0	0	100	100	100	0.949	1.263	1.331	6.64	6.64	6.64	-0.08	0.34	0.41	1e-17	1e-17	1e-17	0.566809	0.413753	0.942222	2.25143e-17	2.43314e-17	2.35969e-17	0.938816
FALSE	High	Master Protein	Q13153	Serine/threonine-protein kinase PAK 1 [OS=Homo sapiens]	0	40.481	13	5	45	2	545	60.6	5.76	161.08	5	cell growth;cell organization and biogenesis;cellular homeostasis;coagulation;conjugation;defense response;development;metabolic process	cytoplasm;cytoskeleton;cytosol;endoplasmic reticulum;membrane;nucleus	motor activity;signal transducer activity;structural molecule activity	Pf00069, Pf00786	5058	ENSG00000149269	PAK1	hsa:5058; O75561; Q13153; Q13567; Q32M53; Q32M54; Q86W79	MAPK6/MAPK4 signaling; Regulation of actin dynamics for phagocytic cup formation; CDC42 GTPase cycle; RAC1 GTPase cycle; RHOQ GTPase cycle; RHOJ GTPase cycle; RHOV GTPase cycle; EPHB-mediated forward signaling; RAC2 GTPase cycle; RAC3 GTPase cycle; RHOU GTPase cycle; Ephrin signaling; Smooth Muscle Contraction; RHO GTPases activate PKNs; RHO GTPases Activate ROCKs; RHO GTPases activate PAKs; VEGF…	Integrin-mediated cell adhesion; Prolactin signaling pathway; Microtubule cytoskeleton regulation; Focal adhesion; Hepatocyte growth factor receptor signaling; Fas ligand pathway and stress induction of heat shock proteins; RAC1/PAK1/p38/MMP2 pathway; Physico-chemical features and toxicity-associated pathways; MAPK signaling pathway; T-cell antigen receptor (TCR) pathway during Staphylococcus aur…	55	0	100	100	100	1.693	1.274	0.753	6.64	6.64	6.64	0.76	0.35	-0.41	1e-17	1e-17	1e-17	0.0828479	0.335217	0.225265	2.25143e-17	2.43314e-17	2.35969e-17	0.393141
FALSE	High	Master Protein	O60287	Nucleolar pre-ribosomal-associated protein 1 [OS=Homo sapiens]	0.006	2.796	1	1	3	1	2271	254.2	6.47	0	1	cellular component movement;cellular homeostasis	membrane		Pf11707, Pf16201	9875	ENSG00000142207	URB1	D3DSE5; hsa:9875; O60287; Q96NX1; Q9NYQ1			0	0	100		100	0.01	1.779	100	6.64		6.64	-6.64	0.83	6.64	1e-17		1e-17	1e-17	0.0535876	1e-17	2.25143e-17		2.35969e-17	1.33839e-16
FALSE	High	Master Protein	P29372	DNA-3-methyladenine glycosylase [OS=Homo sapiens]	0.001	3.969	10	1	7	1	298	32.8	9.57	0	1	cell proliferation;cellular homeostasis;coagulation	cytosol;endosome;membrane	RNA binding;structural molecule activity	Pf02245	4350	ENSG00000103152	MPG	G5E9E2; hsa:4350; P29372; Q13770; Q15275; Q15961; Q5J9I4; Q96BZ6; Q96S33; Q9NNX5	Recognition and association of DNA glycosylase with site containing an affected purine; Cleavage of the damaged purine; Displacement of DNA glycosylase by APEX1	Base excision repair; DNA repair pathways, full network	5	0	100		100	0.01	0.964	100	6.64		6.64	-6.64	-0.05	6.64	1e-17		1e-17	1e-17	0.938642	1e-17	2.25143e-17		2.35969e-17	1.33839e-16
FALSE	Medium	Master Protein	Q13190	Syntaxin-5 [OS=Homo sapiens]	0.038	1.73	5	1	2	1	355	39.6	9.16	0	1	cell growth;conjugation;metabolic process	cytoskeleton;cytosol;extracellular;nucleus	structural molecule activity	Pf05739, Pf11416	6811	ENSG00000162236	STX5	B2R8T2; F8W8Q9; hsa:6811; Q13190; Q5U0D4; Q7Z3T6; Q9BUG1	COPI-mediated anterograde transport; RHOA GTPase cycle; Intra-Golgi traffic; COPII-mediated vesicle transport; RHOG GTPase cycle; Insertion of tail-anchored proteins into the endoplasmic reticulum membrane; Cargo concentration in the ER; RHOC GTPase cycle		8	0	100	100	100	0.972	0.958	0.986	6.64	6.64	6.64	-0.04	-0.06	-0.02	1e-17	1e-17	1e-17	0.567806	0.99592	0.514475	2.25143e-17	2.43314e-17	2.35969e-17	0.938816
FALSE	High	Master Protein	O14579	Coatomer subunit epsilon [OS=Homo sapiens]	0	39.552	58	10	40	10	308	34.5	5.12	82.11	10	conjugation;metabolic process	cytoskeleton;cytosol;extracellular;membrane	structural molecule activity	Pf04733	11316	ENSG00000105669	COPE	A6NE29; A6NKA3; hsa:11316; O14579; O76097; Q6IBB8; Q9UGP6	COPI-dependent Golgi-to-ER retrograde traffic; COPI-mediated anterograde transport		2	0	100	100	100	1.235	1.124	0.91	6.64	6.64	6.64	0.3	0.17	-0.14	1e-17	1e-17	1e-17	0.309514	0.533049	0.597388	2.25143e-17	2.43314e-17	2.35969e-17	0.786188
FALSE	High	Master Protein	P48729	Casein kinase I isoform alpha [OS=Homo sapiens]	0	9.045	9	2	11	2	337	38.9	9.57	34.56	2	cell death;cell differentiation;cell growth;cell organization and biogenesis;cellular homeostasis;development;metabolic process	cytosol;endoplasmic reticulum;membrane;nucleus	signal transducer activity;structural molecule activity	Pf00069	1452	ENSG00000113712	CSNK1A1	D3DQG0; D3DQG1; hsa:1452; P48729; Q4JJA0; Q5U046; Q5U047; Q6FGA2; Q71TU5; Q96HD2; Q9UDK3	Degradation of GLI2 by the proteasome; GLI3 is processed to GLI3R by the proteasome; Disassembly of the destruction complex and recruitment of AXIN to the membrane; Beta-catenin phosphorylation cascade; Signaling by GSK3beta mutants; CTNNB1 S33 mutants aren't phosphorylated; CTNNB1 S37 mutants aren't phosphorylated; CTNNB1 S45 mutants aren't phosphorylated; CTNNB1 T41 mutants aren't phosphorylate…	Alzheimer's disease and miRNA effects; T cell receptor and co-stimulatory signaling; Complement system; Wnt signaling pathway; Wnt/beta-catenin signaling pathway in leukemia; Regulation of Wnt / B-catenin signaling by small molecule compounds; Chromosomal and microsatellite instability in colorectal cancer ; Hedgehog signaling pathway; lncRNA in canonical Wnt signaling and colorectal cancer; Brea…	31	0	100	100	100	0.835	1.214	1.453	6.64	6.64	6.64	-0.26	0.28	0.54	1e-17	1e-17	1e-17	0.935722	0.414755	0.560694	2.25143e-17	2.43314e-17	2.35969e-17	0.993688
FALSE	Medium	Master Protein	Q6ISB3	Grainyhead-like protein 2 homolog [OS=Homo sapiens]	0.038	1.732	4	1	1	1	625	71.1	6.44	0	1	cell communication;cell differentiation;cell growth;defense response;metabolic process	cytoskeleton;membrane;nucleus	RNA binding;structural molecule activity	Pf04516	79977	ENSG00000083307	GRHL2	A1L303; hsa:79977; Q6ISB3; Q6NT03; Q9H8B8		Mesodermal commitment pathway	1	0	100		100	0.01	0.721	100	6.64		6.64	-6.64	-0.47	6.64	1e-17		1e-17	1e-17	0.462269	1e-17	2.25143e-17		2.35969e-17	1.33839e-16
FALSE	High	Master Protein	P63167	Dynein light chain 1, cytoplasmic [OS=Homo sapiens]	0	7.204	37	2	3	1	89	10.4	7.4	6.86	2	cell growth;metabolic process	cytoplasm;cytoskeleton;cytosol;endoplasmic reticulum;endosome;membrane;nucleus	DNA binding;structural molecule activity	Pf01221	8655	ENSG00000088986	DYNLL1	hsa:8655; P63167; Q15701	Neutrophil degranulation; Separation of Sister Chromatids; MHC class II antigen presentation; COPI-mediated anterograde transport; HCMV Early Events; Resolution of Sister Chromatid Cohesion; RHO GTPases Activate Formins; EML4 and NUDC in mitotic spindle formation; Amplification of signal from unattached kinetochores via a MAD2 inhibitory signal; COPI-independent Golgi-to-ER retrograde traffic; HS…	Ciliary landscape; Intraflagellar transport proteins binding to dynein; Genes related to primary cilium development (based on CRISPR); 3q29 copy number variation syndrome	27	1	100	100	100	2.474	1.788	0.723	6.64	6.64	6.64	1.31	0.84	-0.47	1e-17	1e-17	1e-17	0.00846677	0.0287896	0.192657	2.25143e-17	2.43314e-17	2.35969e-17	0.064782
FALSE	High	Master Protein	Q9NP97	Dynein light chain roadblock-type 1 [OS=Homo sapiens]	0	7.679	34	2	8	2	96	10.9	7.25	15.53	2	metabolic process	endoplasmic reticulum;nucleus	motor activity;structural molecule activity	Pf03259	83658	ENSG00000125971	DYNLRB1	B1AKR5; hsa:83658; Q5TC72; Q96IV3; Q9NP97; Q9NQM2	Intraflagellar transport	Ciliary landscape; Intraflagellar transport proteins binding to dynein; 3q29 copy number variation syndrome	4	0	100	100	100	1.892	1.497	0.791	6.64	6.64	6.64	0.92	0.58	-0.34	1e-17	1e-17	1e-17	0.0607995	0.154759	0.291154	2.25143e-17	2.43314e-17	2.35969e-17	0.319752
FALSE	High	Master Protein	Q12788	Transducin beta-like protein 3 [OS=Homo sapiens]	0	18.538	13	6	11	6	808	89	6.9	20.24	6	cellular component movement;cellular homeostasis	membrane;nucleus	RNA binding	Pf00400, Pf08625	10607	ENSG00000183751	TBL3	hsa:10607; Q12788; Q59GD6; Q8IVB7; Q96A78	Major pathway of rRNA processing in the nucleolus and cytosol; rRNA modification in the nucleus and cytosol		2	0	100	100	100	1.359	2.073	1.526	6.64	6.64	6.64	0.44	1.05	0.61	1e-17	1e-17	1e-17	0.25009	0.0158828	0.556984	2.25143e-17	2.43314e-17	2.35969e-17	0.72124
FALSE	High	Master Protein	P16591	Tyrosine-protein kinase Fer [OS=Homo sapiens]	0.006	2.738	2	1	3	1	822	94.6	7.14	4.87	1	cell communication;cell differentiation;cell growth;cell organization and biogenesis;cellular homeostasis;coagulation;development;metabolic process	cytoplasm;cytoskeleton;cytosol;endoplasmic reticulum;membrane;nucleus	antioxidant activity;signal transducer activity;structural molecule activity	Pf00017, Pf00611, Pf07714	2241	ENSG00000151422	FER	B2RCR4; B4DSQ2; H2FLB8; hsa:2241; P16591	Signaling by SCF-KIT		1	0	100	100	100	0.734	1.088	1.482	6.64	6.64	6.64	-0.45	0.12	0.57	1e-17	1e-17	1e-17	0.935985	0.719256	0.844348	2.25143e-17	2.43314e-17	2.35969e-17	0.993688
FALSE	Medium	Master Protein	Q16254	Transcription factor E2F4 [OS=Homo sapiens]	0.04	1.704	4	1	2	1	413	43.9	4.75	0	1	cell differentiation;cell growth;defense response;metabolic process	membrane;nucleus	RNA binding;structural molecule activity	Pf02319, Pf16421	1874	ENSG00000205250	E2F4	A6NGR8; B5BU56; hsa:1874; Q12991; Q15328; Q16254	Cyclin D associated events in G1; Cyclin E associated events during G1/S transition ; Cyclin A:Cdk2-associated events at S phase entry; SMAD2/SMAD3:SMAD4 heterotrimer regulates transcription; TP53 Regulates Transcription of Genes Involved in G2 Cell Cycle Arrest; G1/S-Specific Transcription; Transcription of E2F targets under negative control by DREAM complex; Transcription of E2F targets under n…	Cell cycle; Adipogenesis; TGF-beta signaling pathway	12	0	100		100	0.01	0.868	100	6.64		6.64	-6.64	-0.2	6.64	1e-17		1e-17	1e-17	0.73756	1e-17	2.25143e-17		2.35969e-17	1.33839e-16
FALSE	High	Master Protein	Q9BVL4	Protein adenylyltransferase SelO, mitochondrial [OS=Homo sapiens]	0.002	3.562	3	1	7	1	669	73.4	5.97	2.88	1	cell organization and biogenesis;cellular homeostasis	endosome;nucleus	structural molecule activity	Pf02696	83642	ENSG00000073169	SELENOO	hsa:83642; Q2TAL2; Q5JZ81; Q8WUI0; Q9BVL4		Selenium micronutrient network	1	0	100	100	100	0.776	0.727	0.936	6.64	6.64	6.64	-0.37	-0.46	-0.1	1e-17	1e-17	1e-17	0.867439	0.406482	0.436284	2.25143e-17	2.43314e-17	2.35969e-17	0.986561
FALSE	High	Master Protein	Q96CM8	Medium-chain acyl-CoA ligase ACSF2, mitochondrial [OS=Homo sapiens]	0	14.011	17	4	15	4	615	68.1	7.55	16.27	4	cellular homeostasis	endosome	structural molecule activity	Pf00501, Pf13193	80221	ENSG00000167107	ACSF2	B4DFQ6; B4DHT5; B4DUF5; hsa:80221; Q96CM8; Q9H7G2	Mitochondrial Fatty Acid Beta-Oxidation	Mitochondrial long chain fatty acid beta-oxidation	2	0	100	100	100	1.393	0.707	0.507	6.64	6.64	6.64	0.48	-0.5	-0.98	1e-17	1e-17	1e-17	0.227444	0.427044	0.067594	2.25143e-17	2.43314e-17	2.35969e-17	0.689026
FALSE	High	Master Protein	O43493	Trans-Golgi network integral membrane protein 2 [OS=Homo sapiens]	0	9.051	4	2	8	2	437	45.9	5.63	22.59	2		cytoplasm;cytoskeleton;extracellular;membrane;mitochondrion		Pf17818	10618	ENSG00000152291	TGOLN2	B2R686; B8ZZ88; D6W5K3; F8W8W7; F8WBK2; hsa:10618; J3KQ45; O15282; O43492; O43493; O43499; O43500; O43501; Q53G68; Q53GV2; Q6MZV1; Q6ZTM7; Q8N6T8; Q92760; Q96QL2	Cargo recognition for clathrin-mediated endocytosis; Golgi Associated Vesicle Biogenesis; Regulation of Insulin-like Growth Factor (IGF) transport and uptake by Insulin-like Growth Factor Binding Proteins (IGFBPs); Post-translational protein phosphorylation; Retrograde transport at the Trans-Golgi-Network		6	0	100	100	100	0.471	1.036	2.203	6.64	6.64	6.64	-1.09	0.05	1.14	1e-17	1e-17	1e-17	0.335497	0.902782	0.194468	2.25143e-17	2.43314e-17	2.35969e-17	0.811613
FALSE	High	Master Protein	Q15024	Exosome complex component RRP42 [OS=Homo sapiens]	0.003	3.135	8	1	4	1	291	31.8	5.19	6.9	1	cellular component movement;cellular homeostasis	cytosol;membrane;mitochondrion;nucleus	RNA binding;structural molecule activity	Pf01138, Pf03725	23016	ENSG00000075914	EXOSC7	hsa:23016; Q15024; Q96E72	Major pathway of rRNA processing in the nucleolus and cytosol; ATF4 activates genes in response to endoplasmic reticulum stress; KSRP (KHSRP) binds and destabilizes mRNA; Tristetraprolin (TTP, ZFP36) binds and destabilizes mRNA; Butyrate Response Factor 1 (BRF1) binds and destabilizes mRNA; mRNA decay by 3' to 5' exoribonuclease	Ciliary landscape	7	0	100	100	100	0.342	0.893	2.609	6.64	6.64	6.64	-1.55	-0.16	1.38	1e-17	1e-17	1e-17	0.215249	0.858876	0.148076	2.25143e-17	2.43314e-17	2.35969e-17	0.670405
FALSE	High	Master Protein	P61225	Ras-related protein Rap-2b [OS=Homo sapiens]	0	22.358	31	5	16	3	183	20.5	4.81	38.17	5	cell communication;coagulation;development;metabolic process	cell surface;cytoplasm;cytoskeleton;cytosol;mitochondrion;nucleus	structural molecule activity	Pf00071	5912	ENSG00000181467	RAP2B	hsa:5912; P17964; P61225; Q96EG5; Q9CXG0	Neutrophil degranulation		1	2	100	100	100	1.006	0.71	0.706	6.64	6.64	6.64	0.01	-0.49	-0.5	1e-17	1e-17	1e-17	0.618571	0.301567	0.227765	2.25143e-17	2.43314e-17	2.35969e-17	0.95537
FALSE	High	Master Protein	Q14146	Unhealthy ribosome biogenesis protein 2 homolog [OS=Homo sapiens]	0.001	3.868	2	1	1	1	1524	170.4	7.31	2.42	1	metabolic process	membrane;nucleus		Pf10441	9816	ENSG00000135763	URB2	hsa:9816; Q14146; Q5VYC9			0	0	100		100	0.01	1.135	100	6.64		6.64	-6.64	0.18	6.64	1e-17		1e-17	1e-17	0.629084	1e-17	2.25143e-17		2.35969e-17	1.33839e-16
FALSE	High	Master Protein	Q6P1J9	Parafibromin [OS=Homo sapiens]	0	12.224	9	3	15	3	531	60.5	9.61	34.81	3	cell death;cell differentiation;cell growth;cell organization and biogenesis;cellular component movement;cellular homeostasis;defense response;development;metabolic process	cytosol;membrane	structural molecule activity	Pf05179, Pf16050	79577	ENSG00000134371	CDC73	A6NLZ8; B2RBR2; hsa:79577; Q6P1J9; Q6PK51; Q96A07; Q9H245; Q9H5L7	Hedgehog 'on' state; RNA Polymerase II Pre-transcription Events; E3 ubiquitin ligases ubiquitinate target proteins; Formation of the beta-catenin:TCF transactivating complex; Formation of RNA Pol II elongation complex	Endoderm differentiation	7	0	100	100	100	0.654	0.993	1.517	6.64	6.64	6.64	-0.61	-0.01	0.6	1e-17	1e-17	1e-17	0.745999	0.943897	0.59364	2.25143e-17	2.43314e-17	2.35969e-17	0.981654
FALSE	Medium	Master Protein	Q9NZJ0	Denticleless protein homolog [OS=Homo sapiens]	0.023	2.008	1	1	3	1	730	79.4	8.87	0	1	cell differentiation;cell organization and biogenesis;cell proliferation;cellular homeostasis;coagulation;development;metabolic process	cytoskeleton;cytosol;endoplasmic reticulum;membrane;nucleus		Pf00400	51514	ENSG00000143476	DTL	A8K8H8; D3DT98; hsa:51514; Q5VT77; Q96SN0; Q9NW03; Q9NW34; Q9NWM5; Q9NZJ0	Neddylation; Recognition of DNA damage by PCNA-containing replication complex		2	0	100	100	100	0.56	0.938	1.676	6.64	6.64	6.64	-0.84	-0.09	0.75	1e-17	1e-17	1e-17	0.689079	0.932908	0.621576	2.25143e-17	2.43314e-17	2.35969e-17	0.971932
FALSE	High	Master Protein	P19388	DNA-directed RNA polymerases I, II, and III subunit RPABC1 [OS=Homo sapiens]	0	6.867	21	2	6	2	210	24.5	5.95	18.4	2	cellular component movement;cellular homeostasis	cytosol;membrane	RNA binding;structural molecule activity	Pf01191, Pf03871	5434	ENSG00000099817	POLR2E	B2R6L4; D6W5Y1; hsa:5434; O43380; P19388; Q6PIH5; Q9BT06	mRNA Splicing - Major Pathway; RNA Pol II CTD phosphorylation and interaction with CE during HIV infection; mRNA Capping; RNA Pol II CTD phosphorylation and interaction with CE; MicroRNA (miRNA) biogenesis; mRNA Splicing - Minor Pathway; Transcriptional regulation by small RNAs; B-WICH complex positively regulates rRNA expression; NoRC negatively regulates rRNA expression; Activation of anterior …	Pyrimidine metabolism; Eukaryotic transcription initiation; Cytosolic DNA-sensing pathway	56	0	100	100	100	0.387	1.162	3.005	6.64	6.64	6.64	-1.37	0.22	1.59	1e-17	1e-17	1e-17	0.219331	0.619902	0.0605926	2.25143e-17	2.43314e-17	2.35969e-17	0.677746
FALSE	High	Master Protein	Q9UP83	Conserved oligomeric Golgi complex subunit 5 [OS=Homo sapiens]	0	7.729	5	2	10	2	839	92.7	6.6	5.57	2	conjugation	cytoskeleton;cytosol;extracellular;membrane		Pf10392	10466	ENSG00000164597	COG5	A4D0R6; A4D0R7; hsa:10466; O14555; O95008; Q6NUL5; Q9UP83	COPI-mediated anterograde transport; Retrograde transport at the Trans-Golgi-Network; Intra-Golgi traffic		3	0	100	100	100	0.679	0.84	1.237	6.64	6.64	6.64	-0.56	-0.25	0.31	1e-17	1e-17	1e-17	0.951144	0.745712	0.906661	2.25143e-17	2.43314e-17	2.35969e-17	0.996316
FALSE	High	Master Protein	Q15345	Leucine-rich repeat-containing protein 41 [OS=Homo sapiens]	0.005	2.884	4	1	4	1	812	88.6	8.38	2.57	1	cell organization and biogenesis;cellular homeostasis	cytosol;membrane;nucleus	structural molecule activity		10489	ENSG00000132128	LRRC41	A8K5G8; hsa:10489; Q15345; Q3MJ96; Q5TDF5; Q71RA8; Q9BSM0	Antigen processing: Ubiquitination & Proteasome degradation; Neddylation; RHOBTB3 ATPase cycle		3	0	100	100	100	0.86	1.771	2.061	6.64	6.64	6.64	-0.22	0.82	1.04	1e-17	1e-17	1e-17	0.714358	0.0524886	0.360539	2.25143e-17	2.43314e-17	2.35969e-17	0.97665
FALSE	High	Master Protein	Q96RQ1	Endoplasmic reticulum-Golgi intermediate compartment protein 2 [OS=Homo sapiens]	0.001	4.278	6	1	9	1	377	42.5	6.77	20.64	1	conjugation	cytoskeleton;extracellular;membrane;nucleus		Pf07970, Pf13850	51290	ENSG00000087502	ERGIC2	A6NHH6; hsa:51290; Q53GY2; Q8N2Q9; Q96RQ1; Q9BVV9; Q9NZA3			0	0	100	100	100	1.046	1.595	1.526	6.64	6.64	6.64	0.06	0.67	0.61	1e-17	1e-17	1e-17	0.524692	0.0880831	0.482998	2.25143e-17	2.43314e-17	2.35969e-17	0.923908
FALSE	High	Master Protein	Q96S59	Ran-binding protein 9 [OS=Homo sapiens]	0	11.994	7	3	16	3	729	77.8	6.79	28.04	3	cell growth;development;metabolic process	cytoplasm;cytoskeleton;cytosol;endoplasmic reticulum;membrane;nucleus	structural molecule activity	Pf00622, Pf08513, Pf10607	10048	ENSG00000010017	RANBP9	A0PJA2; B2R8E1; hsa:10048; O94764; Q6P3T7; Q7LBR2; Q7Z7F9; Q96S59	RAF/MAP kinase cascade; MET activates RAS signaling; L1CAM interactions	Brain-derived neurotrophic factor (BDNF) signaling pathway; Ciliary landscape	5	0	100	100	100	0.307	1.034	3.367	6.64	6.64	6.64	-1.7	0.05	1.75	1e-17	1e-17	1e-17	0.0940821	0.88998	0.0300401	2.25143e-17	2.43314e-17	2.35969e-17	0.426776
FALSE	High	Master Protein	Q9BVJ6	U3 small nucleolar RNA-associated protein 14 homolog A [OS=Homo sapiens]	0	6.495	3	2	7	2	771	87.9	7.87	6.9	2	cellular component movement;cellular homeostasis	cytosol;membrane;nucleus		Pf04615	10813	ENSG00000156697	UTP14A	A8K7A3; A8MVQ1; B4DQ08; E9PEL7; hsa:10813; Q5JYF1; Q9BVJ6	Major pathway of rRNA processing in the nucleolus and cytosol; rRNA modification in the nucleus and cytosol		2	0	100	100	100	0.551	1.847	3.353	6.64	6.64	6.64	-0.86	0.89	1.75	1e-17	1e-17	1e-17	0.692041	0.0716625	0.0388577	2.25143e-17	2.43314e-17	2.35969e-17	0.971932
FALSE	High	Master Protein	P17655	Calpain-2 catalytic subunit [OS=Homo sapiens]	0	11.401	8	3	10	3	700	79.9	4.98	9.01	3	cell organization and biogenesis;cellular homeostasis;coagulation;defense response;metabolic process	cytoplasm;cytoskeleton;cytosol;endoplasmic reticulum;endosome;extracellular;membrane;mitochondrion;nucleus	motor activity;structural molecule activity	Pf00648, Pf01067, Pf13833	824	ENSG00000162909	CAPN2	A6NDG7; B7ZA96; E7ES58; hsa:824; P17655; Q16738; Q6PJT3; Q8WU26; Q9HBB1	Degradation of the extracellular matrix; Deregulated CDK5 triggers multiple neurodegenerative pathways in Alzheimer's disease models	Integrin-mediated cell adhesion; Alzheimer's disease and miRNA effects; Focal adhesion; VEGFA-VEGFR2 signaling pathway; Alzheimer's disease	7	0	100	100	100	1.535	0.723	0.471	6.64	6.64	6.64	0.62	-0.47	-1.09	1e-17	1e-17	1e-17	0.157698	0.410746	0.0278212	2.25143e-17	2.43314e-17	2.35969e-17	0.584053
FALSE	High	Master Protein	O15294	UDP-N-acetylglucosamine--peptide N-acetylglucosaminyltransferase 110 kDa subunit [OS=Homo sapiens]	0	10.689	9	4	6	4	1046	116.9	6.7	6.82	4	cell organization and biogenesis;cellular homeostasis;development;metabolic process	cytoplasm;cytoskeleton;cytosol;endosome;membrane;nucleus	structural molecule activity	Pf00515, Pf13181, Pf13414, Pf13424, Pf13844	8473	ENSG00000147162	OGT	hsa:8473; O15294; Q7Z3K0; Q8WWM8; Q96CC1; Q9UG57	UCH proteinases; Regulation of necroptotic cell death; HATs acetylate histones	Ectoderm differentiation; Ectoderm differentiation; Malignant pleural mesothelioma	7	0	100	100	100	0.42	1.3	3.098	6.64	6.64	6.64	-1.25	0.38	1.63	1e-17	1e-17	1e-17	0.372959	0.397759	0.0512469	2.25143e-17	2.43314e-17	2.35969e-17	0.840932
FALSE	High	Master Protein	Q96FQ6	Protein S100-A16 [OS=Homo sapiens]	0	13.328	29	2	10	2	103	11.8	6.79	21.87	2	metabolic process	cell surface;cytoplasm;cytoskeleton;cytosol;membrane;nucleus	structural molecule activity	Pf01023	140576	ENSG00000188643	S100A16	A8K439; D3DV52; hsa:140576; Q5RHS6; Q96FQ6			0	0	100	100	100	3.817	1.725	0.452	6.64	6.64	6.64	1.93	0.79	-1.15	1e-17	1e-17	1e-17	0.000944382	0.0898364	0.00960389	2.25143e-17	2.43314e-17	2.35969e-17	0.0087797
FALSE	Medium	Master Protein	P0DI81	Trafficking protein particle complex subunit 2 [OS=Homo sapiens]	0.013	2.335	10	1	2	1	140	16.4	6.52	4.58	1	conjugation;defense response;metabolic process	cytosol;extracellular;membrane;nucleus	structural molecule activity	Pf04628	6399	ENSG00000196459	TRAPPC2	A6NEG0; hsa:6399; O14582; P0DI81; Q9HD16	COPII-mediated vesicle transport; RAB GEFs exchange GTP for GDP on RABs		2	0	100		100	0.01	1.249	100	6.64		6.64	-6.64	0.32	6.64	1e-17		1e-17	1e-17	0.415099	1e-17	2.25143e-17		2.35969e-17	1.33839e-16
FALSE	High	Master Protein	Q9GZS3	WD repeat-containing protein 61 [OS=Homo sapiens]	0	32.779	27	4	33	4	305	33.6	5.47	80.77	4	cell death;cell organization and biogenesis;cellular component movement;cellular homeostasis;development;metabolic process	cytosol;membrane;nucleus		Pf00400	80349	ENSG00000140395	WDR61	D3DW84; hsa:80349; Q6IA22; Q7Z4X4; Q9GZS3	RNA Polymerase II Pre-transcription Events; E3 ubiquitin ligases ubiquitinate target proteins; Formation of RNA Pol II elongation complex ; mRNA decay by 3' to 5' exoribonuclease		5	0	100	100	100	0.839	1.068	1.273	6.64	6.64	6.64	-0.25	0.1	0.35	1e-17	1e-17	1e-17	0.981933	0.700058	0.760538	2.25143e-17	2.43314e-17	2.35969e-17	0.997943
FALSE	High	Master Protein	O00148	ATP-dependent RNA helicase DDX39A [OS=Homo sapiens]	0	70.671	41	15	111	4	427	49.1	5.68	254.84	15	cellular component movement;cellular homeostasis;conjugation	membrane;nucleus	structural molecule activity	Pf00270, Pf00271	10212	ENSG00000123136	DDX39A	B1Q2N1; hsa:10212; O00148; Q8N5M0; Q9BVP6; Q9H5W0	Transport of Mature mRNA derived from an Intron-Containing Transcript; mRNA 3'-end processing; RNA Polymerase II Transcription Termination		3	0	100	100	100	0.633	0.933	1.475	6.64	6.64	6.64	-0.66	-0.1	0.56	1e-17	1e-17	1e-17	0.374211	0.880578	0.403443	2.25143e-17	2.43314e-17	2.35969e-17	0.841405
FALSE	High	Master Protein	Q15022	Polycomb protein SUZ12 [OS=Homo sapiens]	0.001	4.327	4	2	7	2	739	83	8.81	2.2	2	cell organization and biogenesis;cellular homeostasis;defense response;metabolic process	membrane	DNA binding;RNA binding;structural molecule activity	Pf09733	23512	ENSG00000178691	SUZ12	hsa:23512; Q15022; Q96BD9	HCMV Early Events; Transcriptional Regulation by E2F6; Regulation of PTEN gene transcription; Defective pyroptosis; Activation of anterior HOX genes in hindbrain development during early embryogenesis; Oxidative Stress Induced Senescence; PRC2 methylates histones and DNA; PKMTs methylate histone lysines; SUMOylation of chromatin organization proteins	Interactome of polycomb repressive complex 2 (PRC2) ; Tumor suppressor activity of SMARCB1; Epithelial to mesenchymal transition in colorectal cancer; FBXL10 enhancement of MAP/ERK signaling in diffuse large B-cell lymphoma; Malignant pleural mesothelioma	14	0	100	100	100	0.364	0.839	2.304	6.64	6.64	6.64	-1.46	-0.25	1.2	1e-17	1e-17	1e-17	0.124802	0.636977	0.157415	2.25143e-17	2.43314e-17	2.35969e-17	0.50802
FALSE	High	Master Protein	Q9UKS6	Protein kinase C and casein kinase substrate in neurons protein 3 [OS=Homo sapiens]	0	27.702	12	4	21	4	424	48.5	6.18	59.6	4	cell growth;conjugation;metabolic process	cytoplasm;cytoskeleton;cytosol;mitochondrion;nucleus	motor activity;structural molecule activity	Pf00611, Pf14604	29763	ENSG00000165912	PACSIN3	A6NH84; hsa:29763; Q9H331; Q9NWV9; Q9UKS6	Clathrin-mediated endocytosis		1	0	100	100	100	0.801	0.82	1.023	6.64	6.64	6.64	-0.32	-0.29	0.03	1e-17	1e-17	1e-17	0.842023	0.55994	0.796844	2.25143e-17	2.43314e-17	2.35969e-17	0.985798
FALSE	High	Master Protein	P55196	Afadin [OS=Homo sapiens]	0	40.152	11	11	34	11	1824	206.7	6.47	70.37	11	cell communication;cell death;cell growth;development;metabolic process	cytoplasm;cytoskeleton;cytosol;membrane;nucleus	motor activity;structural molecule activity	Pf00498, Pf00595, Pf00788, Pf01843	4301	ENSG00000130396	AFDN	hsa:4301; O75087; O75088; O75089; P55196; Q59FP0; Q5TIG6; Q5TIG7; Q9NSN7; Q9NU92		VEGFA-VEGFR2 signaling pathway; Ras signaling; 1q21.1 copy number variation syndrome	3	0	100	100	100	0.684	0.898	1.313	6.64	6.64	6.64	-0.55	-0.15	0.39	1e-17	1e-17	1e-17	0.624795	0.829323	0.675356	2.25143e-17	2.43314e-17	2.35969e-17	0.959632
FALSE	High	Master Protein	Q16763	Ubiquitin-conjugating enzyme E2 S [OS=Homo sapiens]	0	5.245	13	1	6	1	222	23.8	8.38	9.49	1	cell differentiation;cell growth;cell organization and biogenesis;cellular homeostasis;metabolic process	cytosol;membrane	structural molecule activity	Pf00179	27338	ENSG00000108106	UBE2S	hsa:27338; Q16763; Q9BTC1	Separation of Sister Chromatids; Antigen processing: Ubiquitination & Proteasome degradation; APC/C:Cdc20 mediated degradation of Securin; APC/C:Cdh1 mediated degradation of Cdc20 and other APC/C:Cdh1 targeted proteins in late mitosis/early G1; Cdc20:Phospho-APC/C mediated degradation of Cyclin A; CDK-mediated phosphorylation and removal of Cdc6; Autodegradation of Cdh1 by Cdh1:APC/C; Assembly of…		19	0	100		100	0.01	1.709	100	6.64		6.64	-6.64	0.77	6.64	1e-17		1e-17	1e-17	0.0644342	1e-17	2.25143e-17		2.35969e-17	1.33839e-16
FALSE	High	Master Protein	Q9NZI5	Grainyhead-like protein 1 homolog [OS=Homo sapiens]	0	10.673	12	3	6	3	618	70.1	6.73	13.15	3	cell growth;defense response;metabolic process	membrane;nucleus	RNA binding;structural molecule activity	Pf04516	29841	ENSG00000134317	GRHL1	A6NLA4; B2R7E4; B5MEC2; hsa:29841; Q53T93; Q6NWN7; Q6NWN8; Q6NWN9; Q8NI33; Q9NZI5	PPARA activates gene expression		1	0	100		100	0.01	0.2	100	6.64		6.64	-6.64	-2.32	6.64	1e-17		1e-17	1e-17	4.14562e-06	1e-17	2.25143e-17		2.35969e-17	1.33839e-16
FALSE	High	Master Protein	P57678	Gem-associated protein 4 [OS=Homo sapiens]	0	7.43	5	3	12	3	1058	120	6.04	11.34	3	cell growth;cellular component movement;cellular homeostasis	cytosol;membrane;nucleus	structural molecule activity		50628	ENSG00000179409	GEMIN4	hsa:50628; P57678; Q9NZS7; Q9UG32; Q9Y4Q2	snRNP Assembly		1	0	100	100	100	0.345	0.891	2.584	6.64	6.64	6.64	-1.54	-0.17	1.37	1e-17	1e-17	1e-17	0.101692	0.79078	0.0519369	2.25143e-17	2.43314e-17	2.35969e-17	0.447219
FALSE	Low	Master Protein	Q9UHC1	DNA mismatch repair protein Mlh3 [OS=Homo sapiens]	0.057	1.522	0	1	1	1	1453	163.6	6.73	1.8	1	cell differentiation;cell growth;cell proliferation;cellular homeostasis;coagulation;metabolic process	membrane;nucleus	RNA binding;structural molecule activity	Pf01119, Pf08676	27030	ENSG00000119684	MLH3	hsa:27030; P49751; Q56DK9; Q9P292; Q9UHC0; Q9UHC1	Meiotic recombination	Male infertility	2	0	0.01	0.01	0.01				-6.64	-6.64	-6.64				1e-17	1e-17	1e-17				2.25143e-17	2.43314e-17	2.35969e-17
FALSE	High	Master Protein	Q7Z6K5	Arpin [OS=Homo sapiens]	0.001	4.898	12	1	5	1	226	24.9	5.83	10.18	1	metabolic process	nucleus		Pf10574	348110	ENSG00000242498	ARPIN	E2QRD5; hsa:348110; Q7Z6K5			0	0	100	100	100	1.381	1.339	0.97	6.64	6.64	6.64	0.47	0.42	-0.04	1e-17	1e-17	1e-17	0.217376	0.33536	0.554463	2.25143e-17	2.43314e-17	2.35969e-17	0.674116
FALSE	High	Master Protein	Q96I25	Splicing factor 45 [OS=Homo sapiens]	0.001	4.752	8	2	7	2	401	44.9	5.97	14.35	2	cellular component movement;cellular homeostasis;metabolic process	membrane	RNA binding	Pf00076, Pf01585	84991	ENSG00000134453	RBM17	hsa:84991; Q96GY6; Q96I25	mRNA Splicing - Major Pathway	mRNA processing	2	0	100	100	100	0.944	1.005	1.064	6.64	6.64	6.64	-0.08	0.01	0.09	1e-17	1e-17	1e-17	0.729666	0.873088	0.820283	2.25143e-17	2.43314e-17	2.35969e-17	0.980195
FALSE	High	Master Protein	O75717	WD repeat and HMG-box DNA-binding protein 1 [OS=Homo sapiens]	0	36.112	17	11	18	11	1129	125.9	5.62	27	11	cell differentiation;cell proliferation;cellular homeostasis;coagulation	membrane;nucleus	RNA binding;structural molecule activity	Pf00400, Pf12341, Pf12894	11169	ENSG00000198554	WDHD1	C9JW18; F6W0U7; hsa:11169; O75717		Mesodermal commitment pathway	1	0	100	100	100	0.113	1.588	14.089	6.64	6.64	6.64	-3.15	0.67	3.82	1e-17	1e-17	1e-17	8.76259e-05	0.0855752	6.73867e-10	2.25143e-17	2.43314e-17	2.35969e-17	0.000904073
FALSE	High	Master Protein	Q96T37	RNA-binding protein 15 [OS=Homo sapiens]	0	5.531	4	2	6	2	977	107.1	10.08	3.71	2	cell growth;cellular component movement;cellular homeostasis;defense response;development;metabolic process	cytoskeleton;membrane;nucleus	RNA binding	Pf00076, Pf07744	64783	ENSG00000162775	RBM15	A1A693; hsa:64783; Q3ZB86; Q4V760; Q5D058; Q5T613; Q86VW9; Q96PE4; Q96SC5; Q96SC6; Q96SC9; Q96SD0; Q96T37; Q96T38; Q9BRA5; Q9H6R8; Q9H9Y0			0	0	100	100	100	0.712	0.895	1.257	6.64	6.64	6.64	-0.49	-0.16	0.33	1e-17	1e-17	1e-17	0.943571	0.803037	0.986763	2.25143e-17	2.43314e-17	2.35969e-17	0.99562
FALSE	High	Master Protein	Q676U5	Autophagy-related protein 16-1 [OS=Homo sapiens]	0.006	2.766	2	1	3	1	607	68.2	6.64	3.48	1	cell growth;cell organization and biogenesis;cellular homeostasis;coagulation;conjugation;metabolic process	cytoskeleton;cytosol;endoplasmic reticulum;mitochondrion;nucleus	structural molecule activity	Pf00400, Pf08614	55054	ENSG00000085978; ENSG00000281089	ATG16L1	A3EXK9; A3EXL0; B6ZDH0; hsa:55054; Q676U5; Q6IPN1; Q6UXW4; Q6ZVZ5; Q8NCY2; Q96JV5; Q9H619	Macroautophagy	Nanoparticle triggered autophagic cell death; Neurodegeneration with brain iron accumulation (NBIA) subtypes pathway; LDLRAD4 and what we know about it; Autophagy	5	0	100	100	100	0.982	0.812	0.827	6.64	6.64	6.64	-0.03	-0.3	-0.27	1e-17	1e-17	1e-17	0.543517	0.681668	0.368756	2.25143e-17	2.43314e-17	2.35969e-17	0.932289
FALSE	Medium	Master Protein	Q9H9C1	Spermatogenesis-defective protein 39 homolog [OS=Homo sapiens]	0.023	1.986	5	1	1	1	493	57	7.4	0	1	cell growth;cell organization and biogenesis;cellular homeostasis;conjugation;metabolic process	extracellular;mitochondrion;nucleus	structural molecule activity	Pf04840	63894	ENSG00000151445	VIPAS39	B4DPI6; hsa:63894; O95434; Q9H7E1; Q9H9C1; Q9H9I9			0	0	100		100	0.01	1.68	100	6.64		6.64	-6.64	0.75	6.64	1e-17		1e-17	1e-17	0.0817875	1e-17	2.25143e-17		2.35969e-17	1.33839e-16
FALSE	High	Master Protein	O95155	Ubiquitin conjugation factor E4 B [OS=Homo sapiens]	0.001	4.072	3	2	4	2	1302	146.1	6.55	0	2	cell organization and biogenesis;cellular homeostasis;coagulation;development;metabolic process	membrane;nucleus	structural molecule activity	Pf04564, Pf10408	10277	ENSG00000130939	UBE4B	A8K8S9; G0ZJH6; hsa:10277; O75169; O95155; O95338; Q5SZ12; Q5SZ16; Q96QD4; Q9BYI7			0	0	100	100	100	0.428	0.684	1.598	6.64	6.64	6.64	-1.23	-0.55	0.68	1e-17	1e-17	1e-17	0.382131	0.358185	0.70735	2.25143e-17	2.43314e-17	2.35969e-17	0.84846
FALSE	Medium	Master Protein	O75146	Huntingtin-interacting protein 1-related protein [OS=Homo sapiens]	0.024	1.955	1	1	2	1	1068	119.3	6.67	2.14	1	cell growth;conjugation;defense response;metabolic process	cytoplasm;cytoskeleton;cytosol;endoplasmic reticulum;endosome;nucleus	motor activity;structural molecule activity	Pf01608, Pf07651, Pf16515	9026	ENSG00000130787	HIP1R	A6NHQ6; hsa:9026; O75146; Q6NXG8; Q9UED9	Clathrin-mediated endocytosis; Golgi Associated Vesicle Biogenesis		2	0	100	100	100	0.421	0.699	1.663	6.64	6.64	6.64	-1.25	-0.52	0.73	1e-17	1e-17	1e-17	0.351519	0.386168	0.650347	2.25143e-17	2.43314e-17	2.35969e-17	0.827406
FALSE	Medium	Master Protein	O60293	Zinc finger C3H1 domain-containing protein [OS=Homo sapiens]	0.022	2.039	1	1	1	1	1989	226.2	8.13	2.87	1	cellular component movement;cellular homeostasis	membrane;nucleus	structural molecule activity	Pf10650	196441	ENSG00000133858	ZFC3H1	hsa:196441; O60293; Q6GMU1; Q6P2S9; Q6ZV36; Q96BE7			0	0	100	100	100	0.478	0.64	1.34	6.64	6.64	6.64	-1.07	-0.64	0.42	1e-17	1e-17	1e-17	0.499636	0.183292	0.989659	2.25143e-17	2.43314e-17	2.35969e-17	0.905961
FALSE	High	Master Protein	Q14181	DNA polymerase alpha subunit B [OS=Homo sapiens]	0.005	2.939	3	1	4	1	598	65.9	5.24	2.05	1	cell proliferation;cellular component movement;cellular homeostasis	cytosol;membrane	RNA binding	Pf04042, Pf08418	23649	ENSG00000014138	POLA2	B4DNB4; hsa:23649; Q14181; Q9BPV3	Inhibition of replication initiation of damaged DNA by RB1/E2F1; Defective pyroptosis; Polymerase switching on the C-strand of the telomere; Polymerase switching; Removal of the Flap Intermediate; Activation of the pre-replicative complex; Telomere C-strand synthesis initiation; DNA replication initiation	Pyrimidine metabolism; G1 to S cell cycle control; DNA replication	12	0	100	100	100	0.211	0.95	4.501	6.64	6.64	6.64	-2.24	-0.07	2.17	1e-17	1e-17	1e-17	0.0267236	0.969141	0.0122487	2.25143e-17	2.43314e-17	2.35969e-17	0.169892
FALSE	High	Master Protein	P35237	Serpin B6 [OS=Homo sapiens]	0	15.646	19	4	10	4	376	42.6	5.27	22.2	4	coagulation;metabolic process	cell surface;cytoplasm;cytoskeleton;cytosol;nucleus	DNA binding;structural molecule activity	Pf00079	5269	ENSG00000124570	SERPINB6	B2RBA8; hsa:5269; P35237; Q59F97; Q5TD06; Q7Z2Y7; Q96J44; Q9UDI7	Neutrophil degranulation; Dissolution of Fibrin Clot	Ectoderm differentiation	3	0	100	100	100	0.903	2.142	2.372	6.64	6.64	6.64	-0.15	1.1	1.25	1e-17	1e-17	1e-17	0.715604	0.00726884	0.0814158	2.25143e-17	2.43314e-17	2.35969e-17	0.977118
FALSE	High	Master Protein	Q15811	Intersectin-1 [OS=Homo sapiens]	0	18.734	5	4	14	4	1721	195.3	7.77	44.21	4	conjugation;defense response;development;metabolic process	cytoplasm;cytoskeleton;cytosol;endoplasmic reticulum;membrane;mitochondrion;nucleus	DNA binding;structural molecule activity	Pf00018, Pf00168, Pf00621, Pf07653, Pf12763, Pf14604, Pf16617, Pf16652	6453	ENSG00000205726	ITSN1	A7Y322; A8CTX8; A8CTY3; A8CTY7; A8D7D0; A8DCP3; B4DTM2; E7ERJ1; E9PE44; E9PG01; E9PHV2; hsa:6453; O95216; Q0PW94; Q0PW95; Q0PW97; Q14BD3; Q15811; Q1ED40; Q20BK3; Q9UET5; Q9UK60; Q9UNK1; Q9UNK2; Q9UQ92	CDC42 GTPase cycle; RHOQ GTPase cycle; EPHB-mediated forward signaling; Cargo recognition for clathrin-mediated endocytosis; RHOG GTPase cycle; G alpha (12/13) signalling events; NRAGE signals death through JNK		8	0	100	100	100	0.899	0.627	0.697	6.64	6.64	6.64	-0.15	-0.67	-0.52	1e-17	1e-17	1e-17	0.772432	0.186955	0.107214	2.25143e-17	2.43314e-17	2.35969e-17	0.983529
FALSE	High	Master Protein	Q7Z478	ATP-dependent RNA helicase DHX29 [OS=Homo sapiens]	0	6.133	4	3	4	3	1369	155.1	8.09	0	3	cell growth;cell organization and biogenesis;cellular homeostasis;metabolic process	cytosol;Golgi	protein binding;RNA binding;structural molecule activity	Pf00270, Pf00271, Pf04408, Pf07717	54505	ENSG00000067248	DHX29	hsa:54505; O75549; Q63HN0; Q63HN3; Q7Z478; Q8IWW2; Q8N3A1; Q9UMH2		VEGFA-VEGFR2 signaling pathway	1	0	100	100	100	0.212	0.166	0.783	6.64	6.64	6.64	-2.24	-2.59	-0.35	1e-17	1e-17	1e-17	0.0121923	1.25171e-06	0.266075	2.25143e-17	2.43314e-17	2.35969e-17	0.0893347
FALSE	High	Master Protein	P50897	Palmitoyl-protein thioesterase 1 [OS=Homo sapiens]	0.001	4.138	5	1	8	1	306	34.2	6.52	17.04	1	cell death;cell growth;cell organization and biogenesis;cellular homeostasis;conjugation;defense response;metabolic process	cell surface;cytoskeleton;cytosol;extracellular;membrane;mitochondrion;nucleus	structural molecule activity	Pf02089	5538	ENSG00000131238	PPT1	B4DY24; hsa:5538; P50897; Q6FGQ4	Fatty acyl-CoA biosynthesis		1	0	100	100	100	1.352	1.089	0.806	6.64	6.64	6.64	0.43	0.12	-0.31	1e-17	1e-17	1e-17	0.243224	0.672277	0.338594	2.25143e-17	2.43314e-17	2.35969e-17	0.711406
FALSE	High	Master Protein	Q96G46	tRNA-dihydrouridine(47) synthase [NAD(P)(+)]-like [OS=Homo sapiens]	0.002	3.382	5	2	2	2	650	72.5	8.05	0	2	cellular component movement;cellular homeostasis		structural molecule activity	Pf01207, Pf18044	56931	ENSG00000141994	DUS3L	hsa:56931; Q96G46; Q96HM5; Q9BSU4; Q9H877; Q9NPR1			0	0	100	100	100	0.81	1.196	1.476	6.64	6.64	6.64	-0.3	0.26	0.56	1e-17	1e-17	1e-17	0.76845	0.499055	0.781441	2.25143e-17	2.43314e-17	2.35969e-17	0.983441
FALSE	High	Master Protein	Q9P0S3	ORM1-like protein 1 [OS=Homo sapiens]	0	7.306	23	2	10	2	153	17.4	9.64	20.88	2	cellular homeostasis;metabolic process	cytoskeleton;extracellular		Pf04061	94101	ENSG00000128699	ORMDL1	B2R8W3; D3DPH9; hsa:94101; Q9P0S3	Sphingolipid de novo biosynthesis		1	0	100	100	100	0.178	1.286	7.214	6.64	6.64	6.64	-2.49	0.36	2.85	1e-17	1e-17	1e-17	0.00757119	0.435922	0.000388095	2.25143e-17	2.43314e-17	2.35969e-17	0.0587611
FALSE	High	Master Protein	Q9HCD6	Protein TANC2 [OS=Homo sapiens]	0.001	4.409	2	2	2	2	1990	219.5	8.07	0	2	conjugation;defense response;metabolic process	nucleus		Pf12796, Pf13181	26115	ENSG00000170921	TANC2	hsa:26115; Q9HAC3; Q9HCD6; Q9NW88; Q9NXY9; Q9ULS2			0	0	100	100	100	1.173	0.84	0.716	6.64	6.64	6.64	0.23	-0.25	-0.48	1e-17	1e-17	1e-17	0.367221	0.674368	0.196178	2.25143e-17	2.43314e-17	2.35969e-17	0.836906
FALSE	High	Master Protein	Q96JG6	Syndetin [OS=Homo sapiens]	0.004	3.098	2	1	5	1	964	111.1	6.2	4.41	1	conjugation	cytosol;mitochondrion	structural molecule activity	Pf10474, Pf10475	55610	ENSG00000004766	VPS50	B3KX22; D1MQ00; F5H5U7; hsa:55610; Q75N07; Q8WVK3; Q96JG6; Q9H5C6			0	0	100	100	100	0.55	0.802	1.457	6.64	6.64	6.64	-0.86	-0.32	0.54	1e-17	1e-17	1e-17	0.662134	0.613132	0.884801	2.25143e-17	2.43314e-17	2.35969e-17	0.966783
FALSE	High	Master Protein	Q96SB4	SRSF protein kinase 1 [OS=Homo sapiens]	0	12.817	9	4	8	4	655	74.3	6.16	20.2	4	cell growth;cell organization and biogenesis;cellular component movement;cellular homeostasis;coagulation;development;metabolic process	cytoplasm;cytoskeleton;cytosol;extracellular;membrane;nucleus	signal transducer activity;structural molecule activity	Pf00069	6732	ENSG00000096063	SRPK1	B4DS61; hsa:6732; Q12890; Q5R364; Q5R365; Q8IY12; Q96SB4	Maturation of nucleoprotein	VEGFA-VEGFR2 signaling pathway; mRNA processing	3	0	100	100	100	0.175	0.444	2.541	6.64	6.64	6.64	-2.52	-1.17	1.35	1e-17	1e-17	1e-17	0.00120239	0.00833663	0.0968524	2.25143e-17	2.43314e-17	2.35969e-17	0.0109892
FALSE	High	Master Protein	Q9NWY4	Histone PARylation factor 1 [OS=Homo sapiens]	0	7.442	7	2	4	2	346	39.4	6.8	7.15	2	cell organization and biogenesis;cell proliferation;cellular homeostasis;coagulation;metabolic process	membrane;nucleus	structural molecule activity	Pf10228	54969	ENSG00000056050	HPF1	hsa:54969; Q9NWY4			0	0	100	100	100	0.605	1.056	1.745	6.64	6.64	6.64	-0.73	0.08	0.8	1e-17	1e-17	1e-17	0.78308	0.707326	0.544433	2.25143e-17	2.43314e-17	2.35969e-17	0.983539
FALSE	High	Master Protein	Q1KMD3	Heterogeneous nuclear ribonucleoprotein U-like protein 2 [OS=Homo sapiens]	0	39.222	21	8	29	8	747	85.1	4.91	76.86	8		membrane		Pf00622, Pf02037, Pf13671	221092	ENSG00000214753	HNRNPUL2	hsa:221092; Q1KMD3; Q8N3B3			0	0	100	100	100	1.114	0.898	0.805	6.64	6.64	6.64	0.16	-0.16	-0.31	1e-17	1e-17	1e-17	0.507363	0.801905	0.344664	2.25143e-17	2.43314e-17	2.35969e-17	0.911038
FALSE	High	Master Protein	Q9NS86	LanC-like protein 2 [OS=Homo sapiens]	0	10.877	7	2	11	2	450	50.8	7.43	26.37	2	cellular homeostasis;metabolic process	cytoplasm;cytoskeleton;cytosol;endoplasmic reticulum;membrane	structural molecule activity	Pf05147	55915	ENSG00000132434	LANCL2	B2R8D4; hsa:55915; Q6NSL4; Q8TCQ3; Q9BSR1; Q9NS86			0	0	100	100	100	0.835	1.187	1.421	6.64	6.64	6.64	-0.26	0.25	0.51	1e-17	1e-17	1e-17	0.901397	0.481452	0.613708	2.25143e-17	2.43314e-17	2.35969e-17	0.992575
FALSE	High	Master Protein	Q16774	Guanylate kinase [OS=Homo sapiens]	0	15.987	45	4	6	4	197	21.7	6.55	16.4	4	cellular homeostasis;conjugation	cytosol;nucleus	signal transducer activity;structural molecule activity	Pf00625	2987	ENSG00000143774	GUK1	B1ANH1; hsa:2987; Q16774	Interconversion of nucleotide di- and triphosphates; Abacavir metabolism; Azathioprine ADME		3	0	100	100	100	1.441	0.836	0.58	6.64	6.64	6.64	0.53	-0.26	-0.79	1e-17	1e-17	1e-17	0.210453	0.632678	0.0821995	2.25143e-17	2.43314e-17	2.35969e-17	0.662946
FALSE	High	Master Protein	Q8N7H5	RNA polymerase II-associated factor 1 homolog [OS=Homo sapiens]	0	7.99	7	2	2	2	531	59.9	4.63	2.52	2	cell death;cell growth;cell organization and biogenesis;cellular component movement;cellular homeostasis;defense response;development;metabolic process	cytoskeleton;membrane;nucleus	structural molecule activity	Pf03985	54623	ENSG00000006712	PAF1	hsa:54623; M0QX35; O75239; Q8N7H5; Q9H166; Q9NUU9	RNA Polymerase II Pre-transcription Events; E3 ubiquitin ligases ubiquitinate target proteins; Formation of RNA Pol II elongation complex	Endoderm differentiation	5	0	100	100	100	0.468	0.828	1.767	6.64	6.64	6.64	-1.09	-0.27	0.82	1e-17	1e-17	1e-17	0.490528	0.724969	0.549751	2.25143e-17	2.43314e-17	2.35969e-17	0.904259
FALSE	High	Master Protein	Q9Y294	Histone chaperone ASF1A [OS=Homo sapiens]	0.007	2.697	14	1	7	1	204	23	4.41	9.32	1	cell growth;cell proliferation;cellular homeostasis;coagulation;metabolic process	membrane;nucleus	structural molecule activity	Pf04729	25842	ENSG00000111875	ASF1A	hsa:25842; Q6IA08; Q9P014; Q9Y294	Formation of Senescence-Associated Heterochromatin Foci (SAHF)	22q11.2 copy number variation syndrome	2	0	100	100	100	0.373	0.779	2.086	6.64	6.64	6.64	-1.42	-0.36	1.06	1e-17	1e-17	1e-17	0.268733	0.60145	0.36129	2.25143e-17	2.43314e-17	2.35969e-17	0.741847
FALSE	Medium	Master Protein	Q9C0C2	182 kDa tankyrase-1-binding protein [OS=Homo sapiens]	0.019	2.096	1	1	3	1	1729	181.7	4.86	0	1	cell growth;cell proliferation;cellular homeostasis;coagulation;metabolic process	cytoplasm;cytoskeleton;cytosol;endoplasmic reticulum;membrane;nucleus	structural molecule activity	Pf15327	85456	ENSG00000149115	TNKS1BP1	A7E2F8; hsa:85456; Q6PJ35; Q6ZV74; Q9C0C2	TP53 regulates transcription of additional cell cycle genes whose exact role in the p53 pathway remain uncertain; Deadenylation of mRNA	Ciliary landscape	3	0	100		100	0.01	2.312	100	6.64		6.64	-6.64	1.21	6.64	1e-17		1e-17	1e-17	0.0145443	1e-17	2.25143e-17		2.35969e-17	1.33839e-16
FALSE	High	Master Protein	O14965	Aurora kinase A [OS=Homo sapiens]	0.001	4.55	5	1	3	1	403	45.8	9.39	4.97	1	cell differentiation;cell growth;cell organization and biogenesis;cellular homeostasis;coagulation;defense response;metabolic process	cytosol;endoplasmic reticulum;membrane;nucleus	signal transducer activity;structural molecule activity	Pf00069	6790	ENSG00000087586	AURKA	E1P5F9; hsa:6790; O14965; O60445; O75873; Q9BQD6; Q9UPG5	APC/C:Cdh1 mediated degradation of Cdc20 and other APC/C:Cdh1 targeted proteins in late mitosis/early G1; FBXL7 down-regulates AURKA during mitotic entry and in early mitosis; Regulation of TP53 Activity through Phosphorylation; SUMOylation of DNA replication proteins; Regulation of PLK1 Activity at G2/M Transition; AURKA Activation by TPX2; TP53 Regulates Transcription of Genes Involved in G2 Ce…	Gastric cancer network 1; EGF/EGFR signaling pathway	10	0	100		100	0.01	3.083	100	6.64		6.64	-6.64	1.62	6.64	1e-17		1e-17	1e-17	0.00027632	1e-17	2.25143e-17		2.35969e-17	1.33839e-16
FALSE	High	Master Protein	Q15833	Syntaxin-binding protein 2 [OS=Homo sapiens]	0.002	3.679	3	1	4	1	593	66.4	6.55	0	1	cell death;conjugation;metabolic process	cell surface;cytoplasm;cytoskeleton;cytosol;mitochondrion;nucleus	structural molecule activity	Pf00995	6813	ENSG00000076944	STXBP2	B4E175; E7EQD5; hsa:6813; Q15833; Q9BU65	Platelet degranulation ; Other interleukin signaling	Splicing factor NOVA regulated synaptic proteins; Insulin signaling	4	0	100	100	100	0.905	0.801	0.884	6.64	6.64	6.64	-0.14	-0.32	-0.18	1e-17	1e-17	1e-17	0.659828	0.631619	0.375926	2.25143e-17	2.43314e-17	2.35969e-17	0.966783
FALSE	High	Master Protein	Q15269	Periodic tryptophan protein 2 homolog [OS=Homo sapiens]	0	16.006	8	4	12	4	919	102.4	6.15	14.72	4	cell growth;cellular component movement;cellular homeostasis	membrane;nucleus		Pf00400, Pf04003	5822	ENSG00000241945	PWP2	B2RAG8; hsa:5822; Q15269; Q96A77	Major pathway of rRNA processing in the nucleolus and cytosol; rRNA modification in the nucleus and cytosol		2	0	100	100	100	2.317	5.526	2.385	6.64	6.64	6.64	1.21	2.47	1.25	1e-17	1e-17	1e-17	0.0255208	4.79595e-07	0.0826169	2.25143e-17	2.43314e-17	2.35969e-17	0.163689
FALSE	High	Master Protein	A3KN83	Protein strawberry notch homolog 1 [OS=Homo sapiens]	0.006	2.773	2	1	3	1	1393	154.2	7.88	4.43	1	metabolic process	membrane	RNA binding;structural molecule activity	Pf13871, Pf13872	55206	ENSG00000139697	SBNO1	A3KN83; hsa:55206; Q05C06; Q3ZTS3; Q9H3T8; Q9NVB2			0	0	100	100	100	0.642	1.051	1.636	6.64	6.64	6.64	-0.64	0.07	0.71	1e-17	1e-17	1e-17	0.865538	0.76317	0.673657	2.25143e-17	2.43314e-17	2.35969e-17	0.98622
FALSE	High	Master Protein	Q8IVT5	Kinase suppressor of Ras 1 [OS=Homo sapiens]	0.001	4.598	3	2	6	2	923	102.1	8.66	7.93	2	cell organization and biogenesis;cellular homeostasis;development;metabolic process	cytoplasm;cytoskeleton;cytosol;extracellular;nucleus	signal transducer activity;structural molecule activity	Pf07714, Pf13543, Pf20406	8844	ENSG00000141068	KSR1	F8WEA9; H7BYU0; hsa:8844; Q13476; Q8IVT5	Signaling by BRAF and RAF1 fusions; Signaling by moderate kinase activity BRAF mutants; Paradoxical activation of RAF signaling by kinase inactive BRAF; Signaling downstream of RAS mutants; Signaling by RAF1 mutants; MAP2K and MAPK activation; Signaling by high-kinase activity BRAF mutants; RAF activation; Negative regulation of MAPK pathway	TNF-alpha signaling pathway; Brain-derived neurotrophic factor (BDNF) signaling pathway; Clear cell renal cell carcinoma pathways; Ras signaling; MAPK pathway in congenital thyroid cancer	14	0	100	100	100	0.798	0.945	1.184	6.64	6.64	6.64	-0.33	-0.08	0.24	1e-17	1e-17	1e-17	0.91621	0.931555	0.889126	2.25143e-17	2.43314e-17	2.35969e-17	0.992849
FALSE	High	Master Protein	Q8IWA0	WD repeat-containing protein 75 [OS=Homo sapiens]	0.005	2.924	2	1	2	1	830	94.4	5.96	0	1	cellular component movement;cellular homeostasis;metabolic process	membrane		Pf00400	84128	ENSG00000115368	WDR75	hsa:84128; Q8IWA0; Q96J10; Q9H8U8; Q9H9U5; Q9H9V8; Q9UIX2	Major pathway of rRNA processing in the nucleolus and cytosol; rRNA modification in the nucleus and cytosol		2	0	100	100	100	1.13	3.277	2.899	6.64	6.64	6.64	0.18	1.71	1.54	1e-17	1e-17	1e-17	0.408025	0.000400879	0.113586	2.25143e-17	2.43314e-17	2.35969e-17	0.865139
FALSE	High	Master Protein	Q9UKD1	Glucocorticoid modulatory element-binding protein 2 [OS=Homo sapiens]	0.001	4.161	4	1	1	1	530	56.4	5.6	2.84	1	cellular component movement;cellular homeostasis;metabolic process	cytosol;membrane;nucleus	RNA binding;structural molecule activity	Pf01342	26205	ENSG00000101216	GMEB2	E1P5J3; hsa:26205; Q5TDS0; Q9H431; Q9H4X7; Q9H4X8; Q9UF78; Q9UKD1; Q9ULF1			0	0	100		100	0.01	0.654	100	6.64		6.64	-6.64	-0.61	6.64	1e-17		1e-17	1e-17	0.222583	1e-17	2.25143e-17		2.35969e-17	1.33839e-16
FALSE	High	Master Protein	O76031	ATP-dependent Clp protease ATP-binding subunit clpX-like, mitochondrial [OS=Homo sapiens]	0	6.466	6	2	8	2	633	69.2	7.58	10.02	2	cell organization and biogenesis;cellular homeostasis;metabolic process	cytoskeleton;cytosol;endosome;membrane;nucleus	DNA binding;structural molecule activity	Pf07724, Pf10431	10845	ENSG00000166855	CLPX	A1L428; A8K8F1; B9EGI8; hsa:10845; O76031; Q9H4D9			0	0	100	100	100	0.292	0.201	0.688	6.64	6.64	6.64	-1.78	-2.32	-0.54	1e-17	1e-17	1e-17	0.0542904	5.54523e-06	0.206415	2.25143e-17	2.43314e-17	2.35969e-17	0.295589
FALSE	High	Master Protein	Q9Y6Q1	Calpain-6 [OS=Homo sapiens]	0	6.091	5	2	4	2	641	74.5	7.05	2.56	2	cell growth;cell organization and biogenesis;metabolic process	endoplasmic reticulum;nucleus	motor activity;structural molecule activity	Pf00168, Pf00648, Pf01067	827	ENSG00000077274	CAPN6	D3DUY7; hsa:827; Q9UEQ1; Q9UJA8; Q9Y6Q1	Degradation of the extracellular matrix	Integrin-mediated cell adhesion	2	0	100	100	100	0.417	1.792	4.293	6.64	6.64	6.64	-1.26	0.84	2.1	1e-17	1e-17	1e-17	0.378242	0.0659041	0.00878916	2.25143e-17	2.43314e-17	2.35969e-17	0.844373
FALSE	High	Master Protein	Q9Y6G9	Cytoplasmic dynein 1 light intermediate chain 1 [OS=Homo sapiens]	0	37.393	22	7	37	7	523	56.5	6.42	89.97	7	cell differentiation;cell growth;metabolic process	cytoplasm;cytoskeleton;cytosol;endoplasmic reticulum;nucleus	structural molecule activity	Pf05783	51143	ENSG00000144635	DYNC1LI1	A2RRG7; hsa:51143; Q53HC8; Q53HK7; Q9Y6G9	Neutrophil degranulation; Separation of Sister Chromatids; MHC class II antigen presentation; COPI-mediated anterograde transport; HCMV Early Events; Resolution of Sister Chromatid Cohesion; RHO GTPases Activate Formins; EML4 and NUDC in mitotic spindle formation; Amplification of signal from unattached kinetochores via a MAD2 inhibitory signal; COPI-independent Golgi-to-ER retrograde traffic; HS…	Ciliary landscape; Intraflagellar transport proteins binding to dynein	15	0	100	100	100	0.981	1.017	1.037	6.64	6.64	6.64	-0.03	0.02	0.05	1e-17	1e-17	1e-17	0.74759	0.849721	0.884244	2.25143e-17	2.43314e-17	2.35969e-17	0.981654
FALSE	High	Master Protein	O43929	Origin recognition complex subunit 4 [OS=Homo sapiens]	0	14.519	16	5	11	5	436	50.3	8	10.19	5	cell proliferation;cellular homeostasis	cytosol;membrane;nucleus	RNA binding;structural molecule activity	Pf13191, Pf14629	5000	ENSG00000115947	ORC4	B7Z3D0; B7Z5F1; D3DP86; F5H069; hsa:5000; O43929; Q96C42	Orc1 removal from chromatin; Activation of ATR in response to replication stress; Activation of the pre-replicative complex; E2F-enabled inhibition of pre-replication complex formation; Assembly of the ORC complex at the origin of replication; CDC6 association with the ORC:origin complex	Cell cycle; G1 to S cell cycle control; DNA replication	10	0	100	100	100	0.296	2.345	7.912	6.64	6.64	6.64	-1.75	1.23	2.98	1e-17	1e-17	1e-17	0.0704689	0.00540152	1.08058e-06	2.25143e-17	2.43314e-17	2.35969e-17	0.352998
FALSE	High	Master Protein	Q9UHJ6	Sedoheptulokinase [OS=Homo sapiens]	0	10.105	7	2	8	2	478	51.5	6.83	19.63	2	cellular homeostasis;metabolic process	cytosol;nucleus	signal transducer activity;structural molecule activity	Pf00370	23729	ENSG00000197417	SHPK	B2R640; hsa:23729; Q8WUH3; Q9UHJ6	Pentose phosphate pathway		1	0	100	100	100	0.782	1.007	1.288	6.64	6.64	6.64	-0.36	0.01	0.37	1e-17	1e-17	1e-17	0.983916	0.964148	0.957758	2.25143e-17	2.43314e-17	2.35969e-17	0.997943
FALSE	Medium	Master Protein	Q03692	Collagen alpha-1(X) chain [OS=Homo sapiens]	0.019	2.091	2	1	1	1	680	66.1	9.67	2.66	1	cell growth;defense response	cell surface;chromosome;extracellular;nucleus	enzyme regulator activity;structural molecule activity	Pf00386, Pf01391	1300	ENSG00000123500	COL10A1	A1L4P2; hsa:1300; Q03692	Collagen degradation; Assembly of collagen fibrils and other multimeric structures; Integrin cell surface interactions; Collagen chain trimerization; Non-integrin membrane-ECM interactions	Endochondral ossification; Endochondral ossification with skeletal dysplasias	8	0	0.01	0.01	0.01				-6.64	-6.64	-6.64				1e-17	1e-17	1e-17				2.25143e-17	2.43314e-17	2.35969e-17
FALSE	High	Master Protein	P06213	Insulin receptor [OS=Homo sapiens]	0	7.016	3	2	2	2	1382	156.2	6.2	2.01	2	cell growth;cell organization and biogenesis;cellular homeostasis;conjugation;defense response;development;metabolic process	cytoplasm;cytoskeleton;mitochondrion;nucleus	antioxidant activity;signal transducer activity;structural molecule activity	Pf00757, Pf01030, Pf07714, Pf17870	3643	ENSG00000171105	INSR	hsa:3643; P06213; Q17RW0; Q59H98; Q9UCB7; Q9UCB8; Q9UCB9	PI5P, PP2A and IER3 Regulate PI3K/AKT Signaling; Insulin receptor recycling; IRS activation; Signal attenuation	AMP-activated protein kinase (AMPK) signaling; Selenium micronutrient network; Vitamin B12 metabolism; Type II diabetes mellitus; Folate metabolism; Alzheimer's disease and miRNA effects; AGE/RAGE pathway; Nanoparticle triggered autophagic cell death; Transcription factor regulation in adipogenesis; Angiopoietin-like protein 8 regulatory pathway; Focal adhesion: PI3K-Akt-mTOR-signaling pathway; L…	31	0	100	100	100	2.022	0.648	0.32	6.64	6.64	6.64	1.02	-0.63	-1.64	1e-17	1e-17	1e-17	0.0624459	0.218668	0.00156416	2.25143e-17	2.43314e-17	2.35969e-17	0.326425
FALSE	High	Master Protein	Q96I51	RCC1-like G exchanging factor-like protein [OS=Homo sapiens]	0	5.667	11	2	10	2	464	50	8.4	11.22	2	cell growth;metabolic process	cytoskeleton;endosome	DNA binding;RNA binding;structural molecule activity	Pf00415, Pf13540	81554	ENSG00000274523	RCC1L	D3DXK0; F5GX55; F5H6C7; hsa:81554; Q548B1; Q8IW88; Q8N572; Q96I51; Q9H0G7			0	0	100	100	100	0.389	0.63	1.62	6.64	6.64	6.64	-1.36	-0.67	0.7	1e-17	1e-17	1e-17	0.2187	0.216437	0.587261	2.25143e-17	2.43314e-17	2.35969e-17	0.676281
FALSE	Medium	Master Protein	P61129	Zinc finger CCCH domain-containing protein 6 [OS=Homo sapiens]	0.033	1.79	1	1	3	1	1189	131.6	7.64	6.97	1		membrane;nucleus	structural molecule activity	Pf00642, Pf14608, Pf18345	376940	ENSG00000188177	ZC3H6	A9JR71; hsa:376940; P61129; Q6ZW96			0	0	100	100	100	0.616	0.678	1.101	6.64	6.64	6.64	-0.7	-0.56	0.14	1e-17	1e-17	1e-17	0.640671	0.284819	0.755421	2.25143e-17	2.43314e-17	2.35969e-17	0.962342
FALSE	High	Master Protein	Q8TCG1	Protein CIP2A [OS=Homo sapiens]	0	5.995	3	1	6	1	905	102.1	6.23	11.6	1		cytoplasm;cytoskeleton;cytosol;nucleus	structural molecule activity		57650	ENSG00000163507	CIP2A	A1L4J7; B9EGC3; hsa:57650; Q6P4G6; Q8TCG1; Q8WVP8; Q96PI2; Q9H9C6; Q9P204		Netrin-UNC5B signaling pathway	1	0	100	100	100	0.427	0.885	2.072	6.64	6.64	6.64	-1.23	-0.18	1.05	1e-17	1e-17	1e-17	0.388493	0.787053	0.328873	2.25143e-17	2.43314e-17	2.35969e-17	0.852515
FALSE	Medium	Master Protein	Q9H9T3	Elongator complex protein 3 [OS=Homo sapiens]	0.032	1.797	2	1	1	1	547	62.2	8.88	1.6	1	cellular component movement;cellular homeostasis;defense response;metabolic process	cytosol;membrane;nucleus	DNA binding;RNA binding;structural molecule activity	Pf00583, Pf04055, Pf16199	55140	ENSG00000134014	ELP3	B4DE19; B4DIG1; E2QRI5; hsa:55140; Q53G84; Q6AWB0; Q9BVF7; Q9H9T3; Q9NVZ1	HATs acetylate histones	Ethanol effects on histone modifications	2	0	100	100	100	0.834	1.048	1.256	6.64	6.64	6.64	-0.26	0.07	0.33	1e-17	1e-17	1e-17	0.842625	0.750715	0.96115	2.25143e-17	2.43314e-17	2.35969e-17	0.985798
FALSE	High	Master Protein	P11310	Medium-chain specific acyl-CoA dehydrogenase, mitochondrial [OS=Homo sapiens]	0	23.808	21	4	15	4	421	46.6	8.37	51.15	4	cellular homeostasis;coagulation;defense response;metabolic process	cytoskeleton;endosome;nucleus	structural molecule activity	Pf00441, Pf02770, Pf02771	34	ENSG00000117054	ACADM	hsa:34; P11310; Q5T4U4; Q9NYF1	PPARA activates gene expression; mitochondrial fatty acid beta-oxidation of unsaturated fatty acids; Beta oxidation of decanoyl-CoA to octanoyl-CoA-CoA; Beta oxidation of octanoyl-CoA to hexanoyl-CoA	Fatty acid beta-oxidation; PPAR-alpha pathway; Nuclear receptors meta-pathway; Mitochondrial long chain fatty acid beta-oxidation; Amino acid metabolism; PPAR signaling pathway; Sudden infant death syndrome (SIDS) susceptibility pathways	11	0	100	100	100	0.233	0.243	1.047	6.64	6.64	6.64	-2.1	-2.04	0.07	1e-17	1e-17	1e-17	0.0123157	7.10488e-05	0.692144	2.25143e-17	2.43314e-17	2.35969e-17	0.0896312
FALSE	High	Master Protein	O95232	Luc7-like protein 3 [OS=Homo sapiens]	0	23.584	19	4	21	4	432	51.4	9.79	45.01	4	cell growth;cellular component movement;cellular homeostasis	membrane	RNA binding	Pf03194	51747	ENSG00000108848	LUC7L3	B3KN54; D3DTY1; hsa:51747; O95232; Q6PHR9; Q9NUY0; Q9P2S7			0	0	100	100	100	0.158	0.71	4.49	6.64	6.64	6.64	-2.66	-0.49	2.17	1e-17	1e-17	1e-17	0.00113615	0.314416	0.00396926	2.25143e-17	2.43314e-17	2.35969e-17	0.010428
FALSE	High	Master Protein	Q9GZM5	Protein YIPF3 [OS=Homo sapiens]	0	8.161	11	2	7	2	350	38.2	5.76	20.12	2	metabolic process	cytoplasm;cytoskeleton;extracellular;nucleus			25844	ENSG00000137207	YIPF3	hsa:25844; Q5JTD2; Q6FI85; Q8NI57; Q9GZM5; Q9NWE3; Q9Y3U9			0	0	100	100	100	0.418	0.843	2.018	6.64	6.64	6.64	-1.26	-0.25	1.01	1e-17	1e-17	1e-17	0.236178	0.665928	0.322452	2.25143e-17	2.43314e-17	2.35969e-17	0.702682
FALSE	High	Master Protein	Q9Y608	Leucine-rich repeat flightless-interacting protein 2 [OS=Homo sapiens]	0	8.118	4	2	10	1	721	82.1	6.95	35.1	2	cell death;development;metabolic process		structural molecule activity	Pf09738	9209	ENSG00000093167	LRRFIP2	A8K649; A8MXR0; B4DY63; hsa:9209; Q68CV3; Q9NXH5; Q9Y608		VEGFA-VEGFR2 signaling pathway	1	0	100	100	100	0.8	1.238	1.548	6.64	6.64	6.64	-0.32	0.31	0.63	1e-17	1e-17	1e-17	0.813249	0.430971	0.750516	2.25143e-17	2.43314e-17	2.35969e-17	0.985798
FALSE	High	Master Protein	P27707	Deoxycytidine kinase [OS=Homo sapiens]	0.005	2.929	5	1	3	1	260	30.5	5.21	2.41	1	cellular homeostasis	cytosol;endosome;membrane;nucleus	signal transducer activity;structural molecule activity	Pf01712	1633	ENSG00000156136	DCK	B2R8V6; hsa:1633; P27707; Q5TZY7; Q6FI11	Pyrimidine salvage; Purine salvage	Retinoblastoma gene in cancer; Pyrimidine metabolism	4	0	100	100	100	0.978	1.077	1.102	6.64	6.64	6.64	-0.03	0.11	0.14	1e-17	1e-17	1e-17	0.667214	0.709983	0.870274	2.25143e-17	2.43314e-17	2.35969e-17	0.968884
FALSE	High	Master Protein	O15212	Prefoldin subunit 6 [OS=Homo sapiens]	0	7.963	31	2	6	2	129	14.6	8.88	8.62	2	cell growth;metabolic process	nucleus	structural molecule activity	Pf01920	10471	ENSG00000204220; ENSG00000206283; ENSG00000224782; ENSG00000235692; ENSG00000237335	PFDN6	hsa:10471; O15212	Prefoldin mediated transfer of substrate to CCT/TriC	Cellular proteostasis	2	0	100	100	100	3.699	2.807	0.759	6.64	6.64	6.64	1.89	1.49	-0.4	1e-17	1e-17	1e-17	0.00154193	0.00260338	0.170132	2.25143e-17	2.43314e-17	2.35969e-17	0.0137722
FALSE	High	Master Protein	Q9NPI6	mRNA-decapping enzyme 1A [OS=Homo sapiens]	0	7.334	14	4	7	4	582	63.2	6.25	0	4	cellular component movement;cellular homeostasis;metabolic process	cytosol;membrane;nucleus	DNA binding;motor activity;RNA binding;structural molecule activity	Pf06058, Pf16741	55802	ENSG00000272886	DCP1A	B4DHN9; hsa:55802; Q9NPI6; U3KQM8	Nonsense Mediated Decay (NMD) enhanced by the Exon Junction Complex (EJC); mRNA decay by 5' to 3' exoribonuclease; Tristetraprolin (TTP, ZFP36) binds and destabilizes mRNA; Butyrate Response Factor 1 (BRF1) binds and destabilizes mRNA	TGF-beta signaling pathway	5	0	100	100	100	0.592	0.801	1.353	6.64	6.64	6.64	-0.76	-0.32	0.44	1e-17	1e-17	1e-17	0.491507	0.537841	0.736784	2.25143e-17	2.43314e-17	2.35969e-17	0.904259
FALSE	High	Master Protein	Q8TB24	Ras and Rab interactor 3 [OS=Homo sapiens]	0.001	4.56	2	1	1	1	985	107.8	6.61	2.29	1	cell growth;conjugation;development;metabolic process	cytosol;mitochondrion;nucleus	DNA binding;structural molecule activity	Pf02204	79890	ENSG00000100599	RIN3	hsa:79890; Q76LB3; Q8NF30; Q8TB24; Q8TEE8; Q8WYP4; Q9H6A5; Q9HAG1	RAB GEFs exchange GTP for GDP on RABs		1	0	100	100	100	0.775	0.949	1.225	6.64	6.64	6.64	-0.37	-0.08	0.29	1e-17	1e-17	1e-17	0.860084	0.998207	0.847084	2.25143e-17	2.43314e-17	2.35969e-17	0.985798
FALSE	High	Master Protein	Q8WUA7	TBC1 domain family member 22A [OS=Homo sapiens]	0.002	3.496	4	1	6	1	517	59.1	5.97	7.51	1	conjugation;metabolic process		DNA binding;structural molecule activity	Pf00566	25771	ENSG00000054611	TBC1D22A	B0QYI2; B0QYI3; B9A6M3; hsa:25771; Q5TE47; Q6ZUH2; Q8WUA7; Q92680; Q9BVD6; Q9UGG0; Q9UGT2; Q9UGU6; Q9UH25; Q9Y4W5			0	0	100	100	100	0.683	0.974	1.427	6.64	6.64	6.64	-0.55	-0.04	0.51	1e-17	1e-17	1e-17	0.985114	0.911743	0.848547	2.25143e-17	2.43314e-17	2.35969e-17	0.997943
FALSE	High	Master Protein	P02787	Serotransferrin [OS=Homo sapiens]	0	13.752	4	3	11	3	698	77	7.12	29.89	3	cell growth;coagulation;conjugation;defense response;development;metabolic process	cell surface;cytoplasm;cytoskeleton;extracellular;mitochondrion;nucleus	antioxidant activity;structural molecule activity	Pf00405	7018	ENSG00000091513	TF	hsa:7018; O43890; P02787; Q1HBA5; Q9NQB8; Q9UHV0	Platelet degranulation ; Regulation of Insulin-like Growth Factor (IGF) transport and uptake by Insulin-like Growth Factor Binding Proteins (IGFBPs); Post-translational protein phosphorylation; Cargo recognition for clathrin-mediated endocytosis; Transferrin endocytosis and recycling	Iron metabolism in placenta; Pluripotent stem cell differentiation pathway; Ferroptosis; IL-18 signaling pathway; 3q29 copy number variation syndrome; Sudden infant death syndrome (SIDS) susceptibility pathways	13	0	0.01	0.012	0.021	100	100	1.714	-6.64	-6.35	-5.57	6.64	6.64	0.78	1e-17	5.44009e-14	2.22045e-16	1e-17	1e-17	0.324841	2.25143e-17	1.32288e-13	5.23669e-16	1.33839e-16
FALSE	Medium	Master Protein	Q15517	Corneodesmosin [OS=Homo sapiens]	0.023	2.007	5	1	1	1	529	51.5	8.35	0	1	cell communication;defense response;metabolic process	cell surface;cytoplasm;cytoskeleton;nucleus	structural molecule activity		1041	ENSG00000137197; ENSG00000237114; ENSG00000237123; ENSG00000237165	CDSN	B0S7V2; B0UYZ7; hsa:1041; O43509; Q15517; Q5SQ85; Q5STD2; Q7LA70; Q7LA71; Q86Z04; Q8IZU4; Q8IZU5; Q8IZU6; Q8N5P3; Q95IF9; Q9NP52; Q9NPE0; Q9NPG5; Q9NRH4; Q9NRH5; Q9NRH6; Q9NRH7; Q9NRH8; Q9UBH8; Q9UIN6; Q9UIN7; Q9UIN8; Q9UIN9; Q9UIP0	Formation of the cornified envelope		1	0	0.01	0.01	0.856		100	100	-6.64	-6.64	-0.22		6.64	6.64	1e-17	1e-17	0.0628148		1e-17	1e-17	2.25143e-17	2.43314e-17	0.12023
FALSE	Medium	Master Protein	Q86XA9	HEAT repeat-containing protein 5A [OS=Homo sapiens]	0.022	2.021	1	1	2	1	2040	221.9	6.58	1.89	1	conjugation;metabolic process	cytosol;nucleus		Pf20210	25938	ENSG00000129493	HEATR5A	hsa:25938; Q68DD8; Q6P3S5; Q6P5R9; Q86XA9; Q9H8D7; Q9NXB7; Q9P2N0; Q9UFQ3			0	0	100	100	100	0.472	0.897	1.9	6.64	6.64	6.64	-1.08	-0.16	0.93	1e-17	1e-17	1e-17	0.480598	0.816768	0.43578	2.25143e-17	2.43314e-17	2.35969e-17	0.900174
FALSE	High	Master Protein	Q13330	Metastasis-associated protein MTA1 [OS=Homo sapiens]	0	10.43	6	3	11	1	715	80.7	9.26	18.69	3	cell growth;cell organization and biogenesis;cell proliferation;cellular homeostasis;coagulation;development;metabolic process	cytosol;endoplasmic reticulum;membrane;nucleus	RNA binding;structural molecule activity	Pf00249, Pf00320, Pf01426, Pf01448, Pf17226	9112	ENSG00000182979	MTA1	A5PLK4; hsa:9112; Q13330; Q86SW2; Q8NFI8; Q96GI8	Regulation of PTEN gene transcription; HDACs deacetylate histones; Potential therapeutics for SARS; RNA Polymerase I Transcription Initiation; ERCC6 (CSB) and EHMT2 (G9a) positively regulate rRNA expression; SUMOylation of transcription factors	Effect of progerin on genes involved in Hutchinson-Gilford progeria syndrome	7	2	100	100	100	0.596	0.976	1.637	6.64	6.64	6.64	-0.75	-0.04	0.71	1e-17	1e-17	1e-17	0.635986	0.988692	0.544959	2.25143e-17	2.43314e-17	2.35969e-17	0.962246
FALSE	High	Master Protein	Q5MIZ7	Serine/threonine-protein phosphatase 4 regulatory subunit 3B [OS=Homo sapiens]	0	7.783	6	3	4	2	849	97.4	4.96	1.62	3	cell organization and biogenesis;cellular homeostasis;metabolic process	endoplasmic reticulum;membrane;nucleus		Pf04802	57223	ENSG00000275052	PPP4R3B	hsa:57223; Q5MIZ7; Q6P9B0; Q86XB8; Q9BQJ0; Q9BRK2; Q9H913; Q9P2G0		16p11.2 proximal deletion syndrome	1	0	100	100		0.672	0.01	0.01	6.64	6.64		-0.57	-6.64	-6.64	1e-17	1e-17		0.942045	1e-17	1e-17	2.25143e-17	2.43314e-17		0.994982
FALSE	High	Master Protein	Q9Y5J1	U3 small nucleolar RNA-associated protein 18 homolog [OS=Homo sapiens]	0.001	4.846	5	1	4	1	556	62	8.76	10.3	1	cellular component movement;cellular homeostasis	cytoskeleton;membrane;nucleus			51096	ENSG00000011260	UTP18	hsa:51096; Q9H4N6; Q9Y5J1	Major pathway of rRNA processing in the nucleolus and cytosol; rRNA modification in the nucleus and cytosol		2	0	100	100	100	0.687	1.755	2.555	6.64	6.64	6.64	-0.54	0.81	1.35	1e-17	1e-17	1e-17	0.97286	0.0759896	0.173735	2.25143e-17	2.43314e-17	2.35969e-17	0.997943
FALSE	High	Master Protein	Q5T9A4	ATPase family AAA domain-containing protein 3B [OS=Homo sapiens]	0	26.778	13	8	31	2	648	72.5	9.2	58.95	8	cell growth	cytoplasm;cytoskeleton;endosome	structural molecule activity	Pf00004, Pf12037	83858	ENSG00000160072	ATAD3B	A8K3H1; hsa:83858; Q5T9A4; Q6ZRB5; Q9BUK4; Q9ULE7	Neutrophil degranulation		1	0	100	100	100	0.378	0.502	1.325	6.64	6.64	6.64	-1.4	-1	0.41	1e-17	1e-17	1e-17	0.207267	0.0553358	0.897928	2.25143e-17	2.43314e-17	2.35969e-17	0.659232
FALSE	High	Master Protein	Q9H974	Queuine tRNA-ribosyltransferase accessory subunit 2 [OS=Homo sapiens]	0	10.732	9	2	12	2	415	46.7	6.81	28.62	2	cellular component movement;cellular homeostasis	cytoskeleton;endosome;nucleus	structural molecule activity	Pf01702	79691	ENSG00000151576	QTRT2	A6NGE9; B7Z472; B7Z5R2; hsa:79691; J3KR78; Q6IA59; Q9H974	tRNA modification in the nucleus and cytosol		1	0	100	100	100	0.843	0.979	1.162	6.64	6.64	6.64	-0.25	-0.03	0.22	1e-17	1e-17	1e-17	0.854783	0.9839	0.835467	2.25143e-17	2.43314e-17	2.35969e-17	0.985798
FALSE	High	Master Protein	Q7L1W4	Volume-regulated anion channel subunit LRRC8D [OS=Homo sapiens]	0	10.804	6	3	22	3	858	98.1	7.72	35.6	3	cell growth;coagulation;conjugation;metabolic process	cytoplasm;cytoskeleton;extracellular;nucleus	catalytic activity	Pf12534, Pf13855	55144	ENSG00000171492	LRRC8D	D3DT29; hsa:55144; Q6UWB2; Q7L1W4; Q9NVW3	Miscellaneous transport and binding events	Neuroinflammation and glutamatergic signaling	2	0	100	100	100	1.057	1.073	1.015	6.64	6.64	6.64	0.08	0.1	0.02	1e-17	1e-17	1e-17	0.516711	0.823325	0.568484	2.25143e-17	2.43314e-17	2.35969e-17	0.919947
FALSE	Medium	Master Protein	Q9Y478	5'-AMP-activated protein kinase subunit beta-1 [OS=Homo sapiens]	0.026	1.881	11	1	2	1	270	30.4	6.4	2.56	1	cell organization and biogenesis;cellular homeostasis;defense response;development;metabolic process	cytosol;membrane;nucleus	signal transducer activity;structural molecule activity	Pf04739, Pf16561	5564	ENSG00000111725	PRKAB1	hsa:5564; Q9UBV0; Q9UE20; Q9UEX2; Q9Y478; Q9Y6V8	TP53 Regulates Metabolic Genes; Regulation of TP53 Activity through Phosphorylation; Translocation of SLC2A4 (GLUT4) to the plasma membrane; Activation of AMPK downstream of NMDARs; Activation of PPARGC1A (PGC-1alpha) by phosphorylation; Macroautophagy; Energy dependent regulation of mTOR by LKB1-AMPK; Lipophagy	AMP-activated protein kinase (AMPK) signaling; Target of rapamycin (TOR) signaling; Energy metabolism; Sterol regulatory element-binding proteins (SREBP) signaling; Factors and pathways affecting insulin-like growth factor (IGF1)-Akt signaling; Angiopoietin-like protein 8 regulatory pathway; Leptin and adiponectin; Lipid metabolism pathway; Thermogenesis; Nonalcoholic fatty liver disease; Synapti…	24	0	100		100	0.01	1.19	100	6.64		6.64	-6.64	0.25	6.64	1e-17		1e-17	1e-17	0.512355	1e-17	2.25143e-17		2.35969e-17	1.33839e-16
FALSE	High	Master Protein	P46734	Dual specificity mitogen-activated protein kinase kinase 3 [OS=Homo sapiens]	0	6.286	10	2	5	2	347	39.3	7.43	4.83	2	cell organization and biogenesis;cellular homeostasis;coagulation;development;metabolic process	cytosol;membrane	signal transducer activity;structural molecule activity	Pf00069	5606	ENSG00000034152	MAP2K3	B3KSK7; hsa:5606; P46734; Q99441; Q9UE71; Q9UE72	activated TAK1 mediates p38 MAPK activation; Oxidative Stress Induced Senescence	Physiological and pathological hypertrophy of the heart; MicroRNAs in cardiomyocyte hypertrophy; Integrin-mediated cell adhesion; IL-1 signaling pathway; Thyroid stimulating hormone (TSH) signaling pathway; Glioblastoma signaling pathways; TNF-alpha signaling pathway; Interleukin-1 (IL-1) structural pathway; Cardiac hypertrophic response; Endoderm differentiation; TGF-beta signaling pathway; MAPK…	32	0	100	100	100	0.775	1.005	1.298	6.64	6.64	6.64	-0.37	0.01	0.38	1e-17	1e-17	1e-17	0.832786	0.858816	0.998923	2.25143e-17	2.43314e-17	2.35969e-17	0.985798
FALSE	High	Master Protein	Q5QJE6	Deoxynucleotidyltransferase terminal-interacting protein 2 [OS=Homo sapiens]	0.001	4.359	4	2	2	2	756	84.4	6.16	3.6	2		membrane;nucleus		Pf08698	30836	ENSG00000067334	DNTTIP2	hsa:30836; Q12987; Q53H59; Q5QJE6; Q5TFJ4; Q6TLI0; Q76MJ8; Q86WX9			0	0	100	100	100	1.012	2.478	2.449	6.64	6.64	6.64	0.02	1.31	1.29	1e-17	1e-17	1e-17	0.525882	0.00611817	0.215786	2.25143e-17	2.43314e-17	2.35969e-17	0.923908
FALSE	High	Master Protein	O14929	Histone acetyltransferase type B catalytic subunit [OS=Homo sapiens]	0	54	40	10	49	10	419	49.5	5.69	123.84	10	cell growth;cell organization and biogenesis;cellular homeostasis;metabolic process	endosome;membrane;nucleus	structural molecule activity	Pf10394	8520	ENSG00000128708	HAT1	hsa:8520; O14929; Q49A44; Q53QF0; Q53SU4; Q6P594; Q8WWB9	HATs acetylate histones	Ethanol effects on histone modifications	2	0	100	100	100	0.332	1.063	3.199	6.64	6.64	6.64	-1.59	0.09	1.68	1e-17	1e-17	1e-17	0.00258501	0.679918	0.00120935	2.25143e-17	2.43314e-17	2.35969e-17	0.0224398
FALSE	High	Master Protein	P09001	39S ribosomal protein L3, mitochondrial [OS=Homo sapiens]	0.006	2.807	5	1	2	1	348	38.6	9.48	2	1	cell organization and biogenesis;cellular homeostasis	cytoskeleton;endosome;Golgi	structural molecule activity	Pf00297	11222	ENSG00000114686	MRPL3	hsa:11222; P09001; Q6IBT2	Mitochondrial translation initiation; Mitochondrial translation elongation; Mitochondrial translation termination		3	0	100	100	100	0.419	0.731	1.743	6.64	6.64	6.64	-1.25	-0.45	0.8	1e-17	1e-17	1e-17	0.252463	0.387458	0.50209	2.25143e-17	2.43314e-17	2.35969e-17	0.723086
FALSE	High	Master Protein	O95359	Transforming acidic coiled-coil-containing protein 2 [OS=Homo sapiens]	0	26.356	4	6	25	6	2948	309.2	4.79	54.89	6	cell differentiation;cell growth;defense response	cytoplasm;cytoskeleton;cytosol;endoplasmic reticulum;membrane;nucleus	structural molecule activity	Pf05010	10579	ENSG00000138162	TACC2	hsa:10579; O95359; Q4VXL0; Q4VXL3; Q4VXL6; Q4VXL7; Q5U5T7; Q86WG6; Q86WG7; Q8TCK9; Q9BVQ1; Q9NZ41; Q9NZR5			0	0	100	100	100	0.425	0.854	2.01	6.64	6.64	6.64	-1.23	-0.23	1.01	1e-17	1e-17	1e-17	0.223924	0.678683	0.247171	2.25143e-17	2.43314e-17	2.35969e-17	0.683633
FALSE	High	Master Protein	P12259	Coagulation factor V [OS=Homo sapiens]	0	22.998	3	6	12	6	2224	251.5	6.05	22.84	6	coagulation;metabolic process	cell surface;cytoplasm;cytoskeleton;extracellular;nucleus	structural molecule activity	Pf00754, Pf07732	2153	ENSG00000198734	F5	A8K6E8; hsa:2153; P12259; Q14285; Q2EHR5; Q5R346; Q5R347; Q6UPU6; Q8WWQ6	Regulation of Insulin-like Growth Factor (IGF) transport and uptake by Insulin-like Growth Factor Binding Proteins (IGFBPs); Post-translational protein phosphorylation; COPII-mediated vesicle transport; Platelet degranulation ; Common Pathway of Fibrin Clot Formation; Cargo concentration in the ER	Blood clotting cascade; Complement and coagulation cascades	8	0	0.01	0.05	0.031	100	100	0.61	-6.64	-4.32	-5.03	6.64	6.64	-0.71	1e-17	1.31885e-09	8.21234e-11	1e-17	1e-17	0.0572386	2.25143e-17	3.17754e-09	1.91785e-10	1.33839e-16
FALSE	High	Master Protein	Q9HD23	Magnesium transporter MRS2 homolog, mitochondrial [OS=Homo sapiens]	0	12.7	13	3	11	3	443	50.3	6.87	17.09	3	cellular homeostasis;conjugation	cytoskeleton;endosome	catalytic activity		57380	ENSG00000124532	MRS2	A8K4U3; B3KNN2; B4DQL2; hsa:57380; Q5T3Y1; Q6NTG4; Q96KF8; Q9BVP1; Q9HD23	Miscellaneous transport and binding events		1	0	100	100	100	0.122	0.362	2.973	6.64	6.64	6.64	-3.04	-1.47	1.57	1e-17	1e-17	1e-17	0.00101232	0.00502079	0.0995524	2.25143e-17	2.43314e-17	2.35969e-17	0.00937102
FALSE	High	Master Protein	Q07687	Homeobox protein DLX-2 [OS=Homo sapiens]	0.007	2.613	4	1	1	1	328	34.2	9.23	2.22	1	defense response;metabolic process	membrane;nucleus	RNA binding;structural molecule activity	Pf00046, Pf12413	1746	ENSG00000115844	DLX2	B4DMK4; B7ZA14; hsa:1746; Q07687		Pre-implantation embryo; Sudden infant death syndrome (SIDS) susceptibility pathways	2	0	0.01	3.15	0.619	100	100	0.196	-6.64	1.66	-0.69	6.64	6.64	-2.35	1e-17	0.387151	0.0419203	1e-17	1e-17	3.82107e-05	2.25143e-17	0.592006	0.0823647	1.33839e-16
FALSE	High	Master Protein	Q96JM3	Chromosome alignment-maintaining phosphoprotein 1 [OS=Homo sapiens]	0.002	3.513	2	1	2	1	812	89	8.44	4.77	1	cell differentiation;cell growth;metabolic process	endoplasmic reticulum;membrane;nucleus	structural molecule activity		283489	ENSG00000198824	CHAMP1	B3KU06; hsa:283489; Q6P181; Q8NC88; Q96JM3; Q9BST0			0	0	100	100	100	0.789	0.563	0.714	6.64	6.64	6.64	-0.34	-0.83	-0.49	1e-17	1e-17	1e-17	0.893182	0.112384	0.2591	2.25143e-17	2.43314e-17	2.35969e-17	0.990311
FALSE	High	Master Protein	O95302	Peptidyl-prolyl cis-trans isomerase FKBP9 [OS=Homo sapiens]	0	6.095	8	2	6	2	570	63	5.08	2.63	2	cell organization and biogenesis;cellular homeostasis;metabolic process	extracellular	structural molecule activity	Pf00254	11328	ENSG00000122642	FKBP9	B3KY35; B7Z1G9; B7Z6H3; hsa:11328; O95302; Q2M2A1; Q3MIR7; Q6IN76; Q6P2N1; Q96EX5; Q96IJ9	Association of TriC/CCT with target proteins during biosynthesis		1	0	100	100	100	1.16	0.759	0.654	6.64	6.64	6.64	0.21	-0.4	-0.61	1e-17	1e-17	1e-17	0.372077	0.4523	0.125321	2.25143e-17	2.43314e-17	2.35969e-17	0.840006
FALSE	High	Master Protein	Q15061	WD repeat-containing protein 43 [OS=Homo sapiens]	0	22.709	18	6	20	6	677	74.8	5.57	38.83	6	cellular component movement;cellular homeostasis;metabolic process	membrane;nucleus	structural molecule activity	Pf00400, Pf04003	23160	ENSG00000163811	WDR43	hsa:23160; Q15061; Q15395; Q92577	Major pathway of rRNA processing in the nucleolus and cytosol; rRNA modification in the nucleus and cytosol		2	0	100	100	100	1.403	2.264	1.614	6.64	6.64	6.64	0.49	1.18	0.69	1e-17	1e-17	1e-17	0.211995	0.00104201	0.317761	2.25143e-17	2.43314e-17	2.35969e-17	0.66506
FALSE	High	Master Protein	Q9UN37	Vacuolar protein sorting-associated protein 4A [OS=Homo sapiens]	0	10.733	11	3	13	1	437	48.9	7.8	24.03	3	cell differentiation;cell growth;cell organization and biogenesis;cellular homeostasis;conjugation;defense response;development;metabolic process	cytoplasm;cytoskeleton;cytosol;endoplasmic reticulum;membrane;mitochondrion;nucleus	structural molecule activity	Pf00004, Pf04212, Pf09336, Pf17862	27183	ENSG00000132612	VPS4A	B2RCB7; hsa:27183; Q8TF07; Q9UI03; Q9UN37; Q9Y582	HCMV Late Events; Budding and maturation of HIV virion; Endosomal Sorting Complex Required For Transport (ESCRT); Sealing of the nuclear envelope (NE) by ESCRT-III	Ebola virus infection in host; Ciliary landscape	6	0	100	100	100	0.944	1.269	1.344	6.64	6.64	6.64	-0.08	0.34	0.43	1e-17	1e-17	1e-17	0.651508	0.382644	0.859676	2.25143e-17	2.43314e-17	2.35969e-17	0.966783
FALSE	High	Master Protein	P49005	DNA polymerase delta subunit 2 [OS=Homo sapiens]	0	9.032	6	2	11	2	469	51.3	5.58	21.88	2	cell proliferation;cellular homeostasis;coagulation	membrane;nucleus	RNA binding	Pf04042, Pf18018	5425	ENSG00000106628	POLD2	A4D2J4; B2R5S4; hsa:5425; P49005	Dual incision in TC-NER; Gap-filling DNA repair synthesis and ligation in TC-NER; Termination of translesion DNA synthesis; HDR through Homologous Recombination (HRR); Recognition of DNA damage by PCNA-containing replication complex; PCNA-Dependent Long Patch Base Excision Repair; Dual Incision in GG-NER; Removal of the Flap Intermediate; Gap-filling DNA repair synthesis and ligation in GG-NER; R…	Homologous recombination; Pyrimidine metabolism; DNA replication; Base excision repair; Nucleotide excision repair; DNA repair pathways, full network; Nucleotide excision repair in xeroderma pigmentosum ; DNA mismatch repair	25	0	100	100	100	0.066	1.06	16.14	6.64	6.64	6.64	-3.93	0.08	4.01	1e-17	1e-17	1e-17	2.04591e-06	0.830731	2.35797e-07	2.25143e-17	2.43314e-17	2.35969e-17	2.30325e-05
FALSE	High	Master Protein	O95376	E3 ubiquitin-protein ligase ARIH2 [OS=Homo sapiens]	0	7.097	3	1	9	1	493	57.8	5.63	31.83	1	cell differentiation;cell organization and biogenesis;cellular homeostasis;defense response;metabolic process	membrane;nucleus	structural molecule activity	Pf01485, Pf19422	10425	ENSG00000177479	ARIH2	hsa:10425; O95376; Q9HBZ6; Q9UEM9	Antigen processing: Ubiquitination & Proteasome degradation	Modulators of TCR signaling and T cell activation	2	0	100	100	100	0.841	1.189	1.415	6.64	6.64	6.64	-0.25	0.25	0.5	1e-17	1e-17	1e-17	0.836644	0.573181	0.799877	2.25143e-17	2.43314e-17	2.35969e-17	0.985798
FALSE	High	Master Protein	Q13123	Protein Red [OS=Homo sapiens]	0	7.12	7	3	16	3	557	65.6	6.64	32.45	3	cell differentiation;cellular component movement;cellular homeostasis;development;metabolic process	endoplasmic reticulum;membrane;nucleus	structural molecule activity	Pf07807, Pf07808	3550	ENSG00000113141	IK	hsa:3550; Q13123; Q6IPD8			0	0	100	100	100	1.174	1.239	1.056	6.64	6.64	6.64	0.23	0.31	0.08	1e-17	1e-17	1e-17	0.371114	0.389438	0.805034	2.25143e-17	2.43314e-17	2.35969e-17	0.839371
FALSE	High	Master Protein	Q13112	Chromatin assembly factor 1 subunit B [OS=Homo sapiens]	0	5.812	5	2	8	2	559	61.5	7.5	14.83	2	cell differentiation;cell growth;cell proliferation;cellular homeostasis;coagulation	membrane;nucleus	structural molecule activity	Pf00400, Pf15512	8208	ENSG00000159259	CHAF1B	hsa:8208; Q13112; Q99548			0	0	100	100	100	0.202	0.913	4.52	6.64	6.64	6.64	-2.31	-0.13	2.18	1e-17	1e-17	1e-17	0.00518992	0.847126	0.00179303	2.25143e-17	2.43314e-17	2.35969e-17	0.0420938
FALSE	High	Master Protein	P13489	Ribonuclease inhibitor [OS=Homo sapiens]	0	59.986	44	11	65	11	461	49.9	4.82	157.58	11	cellular component movement;cellular homeostasis;metabolic process	cell surface;cytosol;membrane	DNA binding	Pf13516, Pf18779	6050	ENSG00000023191; ENSG00000276230	RNH1	hsa:6050; P13489; Q8IZK8; Q96FD7; Q9BQ80; Q9UDK6			0	0	100	100	100	1.313	1.383	1.054	6.64	6.64	6.64	0.39	0.47	0.08	1e-17	1e-17	1e-17	0.215443	0.121781	0.920167	2.25143e-17	2.43314e-17	2.35969e-17	0.670524
FALSE	High	Master Protein	Q14624	Inter-alpha-trypsin inhibitor heavy chain H4 [OS=Homo sapiens]	0	8.102	2	2	11	2	930	103.3	6.98	23.33	2	cellular homeostasis;coagulation;metabolic process	cell surface;cytoplasm;cytoskeleton;nucleus	DNA binding	Pf00092, Pf06668, Pf08487	3700	ENSG00000055955	ITIH4	B7Z545; E9PGN5; hsa:3700; Q14624; Q15135; Q9P190; Q9UQ54	Platelet degranulation	Network map of SARS-CoV-2 signaling pathway	2	0	0.01	0.043	0.04	7.62	7.094	0.931	-6.64	-4.56	-4.66	2.93	2.83	-0.1	1e-17	9.93162e-10	3.11173e-12	1.57056e-07	1.32516e-12	0.600712	2.25143e-17	2.39423e-09	7.31062e-12	1.81054e-06
FALSE	Medium	Master Protein	Q7Z5M8	Protein ABHD12B [OS=Homo sapiens]	0.045	1.669	2	1	3	1	362	40.8	8.28	1.69	1	cellular homeostasis	cytoskeleton;extracellular	structural molecule activity	Pf12146	145447	ENSG00000131969	ABHD12B	hsa:145447; Q3KNR9; Q3KNS0; Q7Z5M6; Q7Z5M7; Q7Z5M8; Q8N4D2			0	0	0.01	0.01	0.054		100	100	-6.64	-6.64	-4.21		6.64	6.64	1e-17	1e-17	1.15416e-06		1e-17	1e-17	2.25143e-17	2.43314e-17	2.602e-06
FALSE	High	Master Protein	Q96PU5	E3 ubiquitin-protein ligase NEDD4-like [OS=Homo sapiens]	0	7.103	4	3	12	1	975	111.9	5.82	2.27	3	cell organization and biogenesis;cellular homeostasis;conjugation;metabolic process	cytosol;extracellular;membrane;mitochondrion;nucleus	structural molecule activity	Pf00168, Pf00397, Pf00632	23327	ENSG00000049759	NEDD4L	hsa:23327; O43165; Q3LSM7; Q7Z5F1; Q7Z5F2; Q7Z5N3; Q8N5A7; Q8WUU9; Q96PU5; Q9BW58; Q9H2W4; Q9NT88	Antigen processing: Ubiquitination & Proteasome degradation; Stimuli-sensing channels; Budding and maturation of HIV virion; Downregulation of TGF-beta receptor signaling; Downregulation of SMAD2/3:SMAD4 transcriptional activity	TGF-beta signaling pathway	6	0	100	100	100	0.662	0.852	1.287	6.64	6.64	6.64	-0.59	-0.23	0.36	1e-17	1e-17	1e-17	0.921167	0.691705	0.924209	2.25143e-17	2.43314e-17	2.35969e-17	0.992849
FALSE	High	Master Protein	P02753	Retinol-binding protein 4 [OS=Homo sapiens]	0	26.678	23	5	16	5	201	23	6.07	39.02	5	cellular homeostasis;conjugation;defense response;metabolic process	cell surface;nucleus	catalytic activity;structural molecule activity	Pf00061	5950	ENSG00000138207	RBP4	D3DR38; hsa:5950; O43478; O43479; P02753; Q5VY24; Q8WWA3; Q9P178	Retinoid metabolism and transport; The canonical retinoid cycle in rods (twilight vision); Retinoid cycle disease events; Retinoid metabolism disease events	Sterol regulatory element-binding proteins (SREBP) signaling; Vitamin A and carotenoid metabolism	6	0	0.01	0.032	0.034	11.29	12.317	1.091	-6.64	-4.98	-4.86	3.5	3.62	0.13	1e-17	1.0858e-12	7.37188e-14	3.42222e-08	2.35367e-14	0.868243	2.25143e-17	2.63883e-12	1.73763e-13	4.05322e-07
FALSE	High	Master Protein	O14964	Hepatocyte growth factor-regulated tyrosine kinase substrate [OS=Homo sapiens]	0	10.789	10	4	10	4	777	86.1	6.16	19.53	4	cell growth;cellular homeostasis;conjugation;development;metabolic process	cytoskeleton;cytosol;mitochondrion;nucleus	structural molecule activity	Pf00790, Pf01363, Pf12210	9146	ENSG00000185359	HGS	hsa:9146; O14964; Q9NR36	Ub-specific processing proteases; RHOU GTPase cycle; Cargo recognition for clathrin-mediated endocytosis; Endosomal Sorting Complex Required For Transport (ESCRT); Lysosome Vesicle Biogenesis; EGFR downregulation; Negative regulation of MET activity; InlB-mediated entry of Listeria monocytogenes into host cell; Inhibition of membrane repair; Prevention of phagosomal-lysosomal fusion; RHOBTB3 ATPa…	TGF-beta signaling pathway; VEGFA-VEGFR2 signaling pathway; Inhibition of exosome biogenesis and secretion by Manumycin A in CRPC cells; EGF/EGFR signaling pathway	16	0	100	100	100	0.725	1.022	1.409	6.64	6.64	6.64	-0.46	0.03	0.5	1e-17	1e-17	1e-17	0.808003	0.808844	0.623892	2.25143e-17	2.43314e-17	2.35969e-17	0.985798
FALSE	High	Master Protein	Q96A65	Exocyst complex component 4 [OS=Homo sapiens]	0	16.427	6	4	16	4	974	110.4	6.49	21.99	4	cell death;cell growth;conjugation;defense response;metabolic process	cytoplasm;cytoskeleton;cytosol;nucleus	structural molecule activity	Pf04048	60412	ENSG00000131558	EXOC4	E9PED2; hsa:60412; Q541U8; Q96A65; Q9C0G4; Q9H9K0; Q9P102	Translocation of SLC2A4 (GLUT4) to the plasma membrane; VxPx cargo-targeting to cilium; Insulin processing	Ciliary landscape	4	0	100	100	100	0.648	0.775	1.195	6.64	6.64	6.64	-0.63	-0.37	0.26	1e-17	1e-17	1e-17	0.707603	0.474955	0.906382	2.25143e-17	2.43314e-17	2.35969e-17	0.975682
FALSE	High	Master Protein	P47890	Olfactory receptor 1G1 [OS=Homo sapiens]	0.007	2.633	7	1	1	1	313	34.9	6.99	0	1	development;metabolic process	cytoplasm;cytoskeleton	structural molecule activity	Pf13853	8390	ENSG00000183024	OR1G1	hsa:8390; P47890; Q4VBM1; Q6IFL9; Q9UM76	Expression and translocation of olfactory receptors	GPCRs, other; GPCRs, class A rhodopsin-like	3	0	100	100	100	1.027	1.073	1.044	6.64	6.64	6.64	0.04	0.1	0.06	1e-17	1e-17	1e-17	0.505758	0.742533	0.542113	2.25143e-17	2.43314e-17	2.35969e-17	0.91043
FALSE	High	Master Protein	Q92541	RNA polymerase-associated protein RTF1 homolog [OS=Homo sapiens]	0.002	3.53	2	1	5	1	710	80.3	8.15	7.21	1	cell death;cell organization and biogenesis;cellular component movement;cellular homeostasis;defense response;development;metabolic process	membrane	RNA binding;structural molecule activity	Pf03126	23168	ENSG00000137815	RTF1	hsa:23168; Q92541; Q96BX6	E3 ubiquitin ligases ubiquitinate target proteins; Formation of RNA Pol II elongation complex ; RNA Polymerase II Pre-transcription Events	Endoderm differentiation	5	0	100	100	100	0.679	0.966	1.422	6.64	6.64	6.64	-0.56	-0.05	0.51	1e-17	1e-17	1e-17	0.938101	0.961073	0.88801	2.25143e-17	2.43314e-17	2.35969e-17	0.993688
FALSE	High	Master Protein	P03915	NADH-ubiquinone oxidoreductase chain 5 [OS=Homo sapiens]	0	12.957	11	3	18	3	603	67	9.03	32.49	3	cell growth;cellular homeostasis;coagulation;conjugation;metabolic process	cytoskeleton;endosome;nucleus	catalytic activity;structural molecule activity	Pf00361, Pf00662, Pf06455	4540	ENSG00000198786	MT-ND5	hsa:4540; P03915; Q34773; Q8WCY3	Complex I biogenesis	Electron transport chain: OXPHOS system in mitochondria; Oxidative phosphorylation	4	0	100	100	100	0.536	0.687	1.281	6.64	6.64	6.64	-0.9	-0.54	0.36	1e-17	1e-17	1e-17	0.409959	0.258356	0.929525	2.25143e-17	2.43314e-17	2.35969e-17	0.865139
FALSE	High	Master Protein	O43808	Peroxisomal membrane protein PMP34 [OS=Homo sapiens]	0.006	2.781	5	1	2	1	307	34.5	10.08	1.8	1	cellular homeostasis;conjugation	cytoskeleton;cytosol;mitochondrion	catalytic activity;structural molecule activity	Pf00153	10478	ENSG00000100372	SLC25A17	A8KA59; hsa:10478; O43808; Q5TFL0; Q9UGW8; Q9UGY7	Class I peroxisomal membrane protein import; Alpha-oxidation of phytanate		2	0	100	100	100	0.918	0.813	0.885	6.64	6.64	6.64	-0.12	-0.3	-0.18	1e-17	1e-17	1e-17	0.644128	0.627325	0.38797	2.25143e-17	2.43314e-17	2.35969e-17	0.964519
FALSE	Medium	Master Protein	Q9HD26	Golgi-associated PDZ and coiled-coil motif-containing protein [OS=Homo sapiens]	0.018	2.144	2	1	2	1	462	50.5	5.92	3.82	1	conjugation;metabolic process	cytoplasm;cytoskeleton;extracellular;mitochondrion;nucleus	structural molecule activity	Pf00595	57120	ENSG00000047932	GOPC	A6NM30; hsa:57120; Q59FS4; Q969U8; Q9HD26	RHOQ GTPase cycle; RHO GTPases regulate CFTR trafficking		2	0	100	100	100	0.462	0.899	1.948	6.64	6.64	6.64	-1.12	-0.15	0.96	1e-17	1e-17	1e-17	0.430317	0.893318	0.41036	2.25143e-17	2.43314e-17	2.35969e-17	0.874271
FALSE	High	Master Protein	P29144	Tripeptidyl-peptidase 2 [OS=Homo sapiens]	0	35.426	14	7	28	7	1249	138.3	6.32	64.11	7	cell organization and biogenesis;cellular homeostasis	cytosol;membrane;nucleus	structural molecule activity	Pf00082, Pf12580	7174	ENSG00000134900	TPP2	hsa:7174; P29144; Q5VZU8	Antigen processing: Ubiquitination & Proteasome degradation		1	0	100	100	100	0.808	1.303	1.613	6.64	6.64	6.64	-0.31	0.38	0.69	1e-17	1e-17	1e-17	0.922947	0.299195	0.44078	2.25143e-17	2.43314e-17	2.35969e-17	0.992849
FALSE	Medium	Master Protein	Q9H201	Epsin-3 [OS=Homo sapiens]	0.015	2.208	2	1	3	1	632	68.2	5.91	1.71	1	conjugation	cytoplasm;cytoskeleton;membrane;mitochondrion;nucleus	structural molecule activity	Pf01417, Pf02809	55040	ENSG00000049283	EPN3	A8K6J3; A8KAB2; hsa:55040; Q9BVN6; Q9H201; Q9NWK2			0	0	100	100	100	0.836	0.815	0.975	6.64	6.64	6.64	-0.26	-0.29	-0.04	1e-17	1e-17	1e-17	0.739145	0.689822	0.570581	2.25143e-17	2.43314e-17	2.35969e-17	0.980195
FALSE	High	Master Protein	Q9NP81	Serine--tRNA ligase, mitochondrial [OS=Homo sapiens]	0	24.147	17	5	21	5	518	58.2	8.13	55.84	5	cell organization and biogenesis;cellular component movement;cellular homeostasis	endosome	RNA binding;structural molecule activity	Pf00587	54938	ENSG00000104835; ENSG00000283104	SARS2	A6NHW7; B4DE10; hsa:54938; Q9BVP3; Q9NP81	Mitochondrial tRNA aminoacylation		1	0	100	100	100	0.546	0.868	1.592	6.64	6.64	6.64	-0.87	-0.2	0.67	1e-17	1e-17	1e-17	0.435969	0.719835	0.476531	2.25143e-17	2.43314e-17	2.35969e-17	0.87585
FALSE	Medium	Master Protein	Q96JB1	Dynein axonemal heavy chain 8 [OS=Homo sapiens]	0.024	1.934	0	1	2	1	4490	514.3	6.32	3.51	1	cell growth;metabolic process	endoplasmic reticulum	motor activity;structural molecule activity	Pf03028, Pf08385, Pf08393, Pf12774, Pf12775, Pf12777, Pf12780, Pf12781, Pf17852, Pf17857, Pf18198, Pf18199	1769	ENSG00000124721	DNAH8	hsa:1769; O00438; Q5JYI2; Q5T2M3; Q5T2M4; Q5TG00; Q96JB1; Q9UEM4			0	0	0.01	0.06	0.067	21.711	24.526	1.13	-6.64	-4.06	-3.89	4.44	4.62	0.18	1e-17	4.14665e-08	6.4289e-08	2.78577e-12	1e-17	0.923139	2.25143e-17	9.82102e-08	1.4702e-07	3.59489e-11
FALSE	High	Master Protein	Q9ULA0	Aspartyl aminopeptidase [OS=Homo sapiens]	0	18.421	20	5	26	5	485	53.4	7.58	38.56	5	cell organization and biogenesis;cellular homeostasis	cytosol;nucleus	structural molecule activity	Pf02127	23549	ENSG00000123992	DNPEP	hsa:23549; Q9BW44; Q9NUV5; Q9NV55; Q9ULA0		Ciliary landscape	1	0	100	100	100	1.159	0.748	0.645	6.64	6.64	6.64	0.21	-0.42	-0.63	1e-17	1e-17	1e-17	0.472814	0.391971	0.134019	2.25143e-17	2.43314e-17	2.35969e-17	0.896446
FALSE	High	Master Protein	P05452	Tetranectin [OS=Homo sapiens]	0	33.499	36	5	15	5	202	22.5	5.67	44.44	5	defense response;metabolic process	cell surface;membrane;nucleus	structural molecule activity	Pf00059	7123	ENSG00000163815	CLEC3B	hsa:7123; P05452; Q6FGX6	Platelet degranulation		1	0	0.01	0.053	0.031	12.159	7.146	0.588	-6.64	-4.24	-5.01	3.6	2.84	-0.77	1e-17	6.37384e-09	1.80596e-11	3.7101e-09	2.39223e-08	0.0457068	2.25143e-17	1.52513e-08	4.2336e-11	4.5825e-08
FALSE	High	Master Protein	O75688	Protein phosphatase 1B [OS=Homo sapiens]	0	26.026	20	7	28	7	479	52.6	5.05	72.25	7	cell organization and biogenesis;cellular homeostasis;metabolic process	cytoskeleton;cytosol;membrane	structural molecule activity	Pf00481, Pf07830	5495	ENSG00000138032	PPM1B	hsa:5495; O75688; Q461Q2; Q4J6C1; Q4J6C2; Q658R4; Q96ER6; Q9HAY8	ISG15 antiviral mechanism; ALK mutants bind TKIs; Signaling by ALK fusions and activated point mutants	MAPK signaling pathway	4	0	100	100	100	0.732	0.986	1.346	6.64	6.64	6.64	-0.45	-0.02	0.43	1e-17	1e-17	1e-17	0.575644	0.932314	0.516098	2.25143e-17	2.43314e-17	2.35969e-17	0.939542
FALSE	High	Master Protein	Q8NI36	WD repeat-containing protein 36 [OS=Homo sapiens]	0	10.036	8	4	12	4	951	105.3	7.53	9.26	4	cellular component movement;cellular homeostasis;metabolic process	membrane;nucleus		Pf00400, Pf04192, Pf12894	134430	ENSG00000134987	WDR36	A2RUS4; hsa:134430; Q68E02; Q8N1Q2; Q8NI36	Major pathway of rRNA processing in the nucleolus and cytosol; rRNA modification in the nucleus and cytosol		2	0	100	100	100	1.074	2.151	2.003	6.64	6.64	6.64	0.1	1.1	1	1e-17	1e-17	1e-17	0.469924	0.0294127	0.320033	2.25143e-17	2.43314e-17	2.35969e-17	0.895945
FALSE	High	Master Protein	Q9P260	RAB11-binding protein RELCH [OS=Homo sapiens]	0	18.609	6	5	24	5	1216	134.5	5.45	43.79	5	conjugation	extracellular;mitochondrion			57614	ENSG00000134444	RELCH	hsa:57614; Q9P260			0	0	100	100	100	0.585	0.893	1.527	6.64	6.64	6.64	-0.77	-0.16	0.61	1e-17	1e-17	1e-17	0.537379	0.773165	0.593054	2.25143e-17	2.43314e-17	2.35969e-17	0.931936
FALSE	High	Master Protein	Q9Y530	ADP-ribose glycohydrolase OARD1 [OS=Homo sapiens]	0.001	4.968	13	1	6	1	152	17	8.31	12.35	1	cell organization and biogenesis;cellular homeostasis;coagulation	membrane;nucleus	structural molecule activity	Pf01661	221443	ENSG00000124596	OARD1	A6NEK4; A8K4H4; hsa:221443; Q96F23; Q9Y530			0	0	100	100	100	1.042	0.779	0.747	6.64	6.64	6.64	0.06	-0.36	-0.42	1e-17	1e-17	1e-17	0.480524	0.512683	0.217112	2.25143e-17	2.43314e-17	2.35969e-17	0.900174
FALSE	High	Master Protein	Q9NWU1	3-oxoacyl-[acyl-carrier-protein] synthase, mitochondrial [OS=Homo sapiens]	0	25.067	33	7	25	7	459	48.8	7.66	45.95	7	cellular homeostasis	cytosol;endosome	structural molecule activity	Pf00109, Pf02801	54995	ENSG00000151093	OXSM	hsa:54995; Q9NWU1		Mitochondrial fatty acid synthesis pathway	1	0	100	100	100	0.542	0.912	1.683	6.64	6.64	6.64	-0.88	-0.13	0.75	1e-17	1e-17	1e-17	0.448824	0.834984	0.450437	2.25143e-17	2.43314e-17	2.35969e-17	0.88297
FALSE	Medium	Master Protein	Q96R06	Sperm-associated antigen 5 [OS=Homo sapiens]	0.04	1.712	1	1	2	1	1193	134.3	5	0	1	cell differentiation;cell growth;metabolic process	cytosol;endoplasmic reticulum;membrane;nucleus	motor activity		10615	ENSG00000076382	SPAG5	hsa:10615; O95213; Q96R06; Q9BWE8; Q9NT17; Q9UFE6			0	0	100		100	0.01	1.183	100	6.64		6.64	-6.64	0.24	6.64	1e-17		1e-17	1e-17	0.528573	1e-17	2.25143e-17		2.35969e-17	1.33839e-16
FALSE	High	Master Protein	Q9BZG8	2-(3-amino-3-carboxypropyl)histidine synthase subunit 1 [OS=Homo sapiens]	0	5.421	8	2	3	2	443	48.8	8.18	4.55	2	cell organization and biogenesis;cellular homeostasis	cytosol;membrane;nucleus	structural molecule activity	Pf01866	1801	ENSG00000108963	DPH1	D3DTI3; hsa:1801; Q16439; Q4VBA2; Q9BTW7; Q9BZG8; Q9UCY0	Synthesis of diphthamide-EEF2		1	0	100	100	100	0.577	1.158	2.007	6.64	6.64	6.64	-0.79	0.21	1.01	1e-17	1e-17	1e-17	0.732063	0.583547	0.399086	2.25143e-17	2.43314e-17	2.35969e-17	0.980195
FALSE	High	Master Protein	Q9HC36	rRNA methyltransferase 3, mitochondrial [OS=Homo sapiens]	0	8.679	6	2	9	2	420	47	8.73	6.66	2	cellular component movement;cellular homeostasis	endosome	structural molecule activity	Pf00588	55178	ENSG00000171861	MRM3	hsa:55178; Q53GN1; Q86VC3; Q96F76; Q9HC36; Q9NVQ5	rRNA modification in the mitochondrion		1	0	100	100	100	0.428	0.497	1.161	6.64	6.64	6.64	-1.22	-1.01	0.22	1e-17	1e-17	1e-17	0.349035	0.068851	0.731246	2.25143e-17	2.43314e-17	2.35969e-17	0.826885
FALSE	Medium	Master Protein	Q5SNT2	Transmembrane protein 201 [OS=Homo sapiens]	0.04	1.706	2	1	1	1	666	72.2	9.22	1.83	1	cell growth;conjugation;metabolic process	cytoskeleton;endoplasmic reticulum;membrane;nucleus	motor activity;structural molecule activity	Pf09779, Pf10476	199953	ENSG00000188807	TMEM201	B9EH90; hsa:199953; Q5SNT2; Q5SNT3			0	0	100	100	100	0.715	0.986	1.38	6.64	6.64	6.64	-0.48	-0.02	0.46	1e-17	1e-17	1e-17	0.980506	0.91618	0.951388	2.25143e-17	2.43314e-17	2.35969e-17	0.997943
FALSE	High	Master Protein	P50851	Lipopolysaccharide-responsive and beige-like anchor protein [OS=Homo sapiens]	0	16.836	3	6	16	6	2863	318.9	5.6	20.18	6	metabolic process	cytoplasm;cytoskeleton;cytosol;extracellular;mitochondrion	structural molecule activity	Pf02138, Pf06469, Pf13385, Pf14844, Pf15787, Pf20425, Pf20426	987	ENSG00000198589	LRBA	hsa:987; P50851; Q4W5J4; Q4W5L6; Q8NFQ0; Q9H2U3; Q9H2U4			0	0	100	100	100	1.13	1.081	0.956	6.64	6.64	6.64	0.18	0.11	-0.06	1e-17	1e-17	1e-17	0.478695	0.669758	0.610197	2.25143e-17	2.43314e-17	2.35969e-17	0.899746
FALSE	High	Master Protein	Q9BT09	Protein canopy homolog 3 [OS=Homo sapiens]	0	8.494	14	3	4	3	278	30.7	5.49	9.77	3	coagulation	extracellular	antioxidant activity	Pf11938	10695	ENSG00000137161	CNPY3	hsa:10695; O15412; Q0P6I2; Q8NF54; Q8WTU8; Q9BT09; Q9P0F2	Trafficking and processing of endosomal TLR		1	0	100	100		2.951	0.01	0.01	6.64	6.64		1.56	-6.64	-6.64	1e-17	1e-17		0.00727935	1e-17	1e-17	2.25143e-17	2.43314e-17		0.0569053
FALSE	High	Master Protein	P42345	Serine/threonine-protein kinase mTOR [OS=Homo sapiens]	0	25.319	6	8	30	8	2549	288.7	7.17	19.34	8	cell growth;cell organization and biogenesis;cellular homeostasis;coagulation;defense response;development;metabolic process	cytoskeleton;cytosol;endosome;extracellular;membrane;mitochondrion;nucleus	protein binding;RNA binding;signal transducer activity;structural molecule activity	Pf00454, Pf02259, Pf02260, Pf08771, Pf11865	2475	ENSG00000198793	MTOR	hsa:2475; P42345; Q4LE76; Q5TER1; Q6LE87; Q96QG3; Q9Y4I3	PIP3 activates AKT signaling; CD28 dependent PI3K/Akt signaling; Amino acids regulate mTORC1; Regulation of PTEN gene transcription; mTORC1-mediated signalling; TP53 Regulates Metabolic Genes; Macroautophagy; Energy dependent regulation of mTOR by LKB1-AMPK; VEGFR2 mediated vascular permeability; Regulation of TP53 Degradation; HSF1-dependent transactivation; Constitutive Signaling by AKT1 E17K i…	AMP-activated protein kinase (AMPK) signaling; Target of rapamycin (TOR) signaling; MicroRNAs in cardiomyocyte hypertrophy; Type II diabetes mellitus; Sterol regulatory element-binding proteins (SREBP) signaling; SREBF and miR33 in cholesterol and lipid homeostasis; RANKL/RANK signaling pathway; Thyroid stimulating hormone (TSH) signaling pathway; Leptin signaling pathway; Follicle stimulating ho…	74	0	100	100	100	0.538	1.178	2.191	6.64	6.64	6.64	-0.9	0.24	1.13	1e-17	1e-17	1e-17	0.4601	0.531165	0.138551	2.25143e-17	2.43314e-17	2.35969e-17	0.892891
FALSE	High	Master Protein	Q9NZJ9	Diphosphoinositol polyphosphate phosphohydrolase 2 [OS=Homo sapiens]	0	5.798	13	1	4	1	180	20.3	6.35	9.26	1	cellular homeostasis;development	cytosol;membrane;nucleus	RNA binding;structural molecule activity	Pf00293	11163	ENSG00000173598	NUDT4	B7Z916; hsa:11163; Q4AEJ6; Q53EZ2; Q68DD7; Q9NPC5; Q9NS30; Q9NZJ9; Q9NZK0; Q9NZK1	Synthesis of pyrophosphates in the cytosol		1	0	0.01	0.057	0.091	13.042	21.005	1.61	-6.64	-4.14	-3.46	3.71	4.39	0.69	1e-17	7.12477e-09	2.80911e-09	1e-17	1e-17	0.169237	2.25143e-17	1.70189e-08	6.4792e-09	1.33839e-16
FALSE	Medium	Master Protein	Q9BYP7	Serine/threonine-protein kinase WNK3 [OS=Homo sapiens]	0.034	1.777	1	1	2	1	1800	198.3	6.07	0	1	cell growth;cell organization and biogenesis;cellular homeostasis;coagulation;development;metabolic process	cytosol;nucleus	signal transducer activity;structural molecule activity	Pf00069, Pf12202	65267	ENSG00000196632	WNK3	B1AKG2; hsa:65267; Q5JRC1; Q6JP76; Q8TCX6; Q9BYP7; Q9HCK6	Stimuli-sensing channels		1	0	100	100	100	1.69	1.595	0.944	6.64	6.64	6.64	0.76	0.67	-0.08	1e-17	1e-17	1e-17	0.11228	0.141243	0.586364	2.25143e-17	2.43314e-17	2.35969e-17	0.472458
FALSE	High	Master Protein	O43504	Ragulator complex protein LAMTOR5 [OS=Homo sapiens]	0	6.99	48	2	6	2	91	9.6	4.87	18.4	2	cell growth;metabolic process	cytoskeleton;cytosol;mitochondrion;nucleus		Pf16672	10542	ENSG00000134248	LAMTOR5	hsa:10542; O43504; Q6IBD8	Amino acids regulate mTORC1; Regulation of PTEN gene transcription; mTORC1-mediated signalling; TP53 Regulates Metabolic Genes; Macroautophagy; Energy dependent regulation of mTOR by LKB1-AMPK		7	0	100	100	100	2.218	3.134	1.413	6.64	6.64	6.64	1.15	1.65	0.5	1e-17	1e-17	1e-17	0.0268137	0.00019891	0.644384	2.25143e-17	2.43314e-17	2.35969e-17	0.169964
FALSE	High	Master Protein	Q9H3P7	Golgi resident protein GCP60 [OS=Homo sapiens]	0	56.104	36	10	56	10	528	60.6	5.06	162.92	10	cellular homeostasis	cytoskeleton;endosome;extracellular	structural molecule activity	Pf00887, Pf13897	64746	ENSG00000182827	ACBD3	B2RB29; hsa:64746; Q5VTJ0; Q6P9F1; Q8IZC5; Q8N4D6; Q9H3P7; Q9H6U3	Golgi Associated Vesicle Biogenesis		1	0	100	100	100	1.008	0.812	0.806	6.64	6.64	6.64	0.01	-0.3	-0.31	1e-17	1e-17	1e-17	0.685791	0.420038	0.34241	2.25143e-17	2.43314e-17	2.35969e-17	0.971932
FALSE	High	Master Protein	Q9UPQ8	Dolichol kinase [OS=Homo sapiens]	0	15.495	9	2	14	2	538	59.2	8.6	26.14	2	cell organization and biogenesis;cellular homeostasis	cytoskeleton;extracellular	signal transducer activity		22845	ENSG00000175283	DOLK	hsa:22845; Q5SRE6; Q9UPQ8	Synthesis of Dolichyl-phosphate; Defective DOLK causes DOLK-CDG		2	0	100	100	100	0.453	0.961	2.122	6.64	6.64	6.64	-1.14	-0.06	1.09	1e-17	1e-17	1e-17	0.456089	0.953022	0.332979	2.25143e-17	2.43314e-17	2.35969e-17	0.89095
FALSE	High	Master Protein	P20908	Collagen alpha-1(V) chain [OS=Homo sapiens]	0	6.836	2	2	4	2	1838	183.4	5.06	7.01	2	cell communication;cell growth;cellular homeostasis;coagulation;defense response;metabolic process	cell surface;chromosome;extracellular	antioxidant activity;enzyme regulator activity;structural molecule activity	Pf01391, Pf01410	1289	ENSG00000130635	COL5A1	A0A087WXW9; hsa:1289; P20908; Q15094; Q5SUX4	Collagen degradation; Assembly of collagen fibrils and other multimeric structures; Integrin cell surface interactions; ECM proteoglycans; Collagen chain trimerization; Syndecan interactions; MET activates PTK2 signaling; Signaling by PDGF; NCAM1 interactions	Allograft rejection; miRNA targets in ECM and membrane receptors; Focal adhesion: PI3K-Akt-mTOR-signaling pathway; miR-509-3p alteration of YAP1/ECM axis	16	0	0.01	0.01	0.052		100	100	-6.64	-6.64	-4.27		6.64	6.64	1e-17	1e-17	4.06667e-06		1e-17	1e-17	2.25143e-17	2.43314e-17	9.07765e-06
FALSE	Medium	Master Protein	Q9Y6K0	Choline/ethanolaminephosphotransferase 1 [OS=Homo sapiens]	0.015	2.232	4	1	2	1	416	46.5	8.21	2.23	1	cellular homeostasis	cytoskeleton;extracellular;membrane	structural molecule activity	Pf01066	10390	ENSG00000134255	CEPT1	hsa:10390; Q69YJ9; Q9P0Y8; Q9Y6K0	Synthesis of PC; Synthesis of PE	Kennedy pathway from sphingolipids; One-carbon metabolism and related pathways	4	0	100	100	100	0.747	0.764	1.023	6.64	6.64	6.64	-0.42	-0.39	0.03	1e-17	1e-17	1e-17	0.910789	0.476902	0.550238	2.25143e-17	2.43314e-17	2.35969e-17	0.992849
FALSE	High	Master Protein	Q5K4L6	Solute carrier family 27 member 3 [OS=Homo sapiens]	0	6.879	8	2	9	2	683	73.5	7.09	8.3	2	cellular homeostasis;conjugation	cytoskeleton;endosome;extracellular	catalytic activity;structural molecule activity	Pf00501, Pf13193	11000	ENSG00000143554; ENSG00000263163	SLC27A3	hsa:11000; Q5K4L6; Q5VUQ7; Q5VUQ8; Q5VUR3; Q6ZV16; Q8N2X7; Q8TEJ0; Q96SW5; Q9BTJ5; Q9BTY5	Synthesis of very long-chain fatty acyl-CoAs		1	0	100	100	100	1.487	0.826	0.555	6.64	6.64	6.64	0.57	-0.28	-0.85	1e-17	1e-17	1e-17	0.181368	0.702399	0.0929221	2.25143e-17	2.43314e-17	2.35969e-17	0.630359
FALSE	High	Master Protein	O75691	Small subunit processome component 20 homolog [OS=Homo sapiens]	0	14.053	2	3	11	3	2785	318.2	7.39	20.42	3	cellular component movement;cellular homeostasis;metabolic process	cytoplasm;cytoskeleton;membrane;nucleus		Pf07539, Pf20416	27340	ENSG00000120800	UTP20	hsa:27340; O75691; Q9H3H4	Major pathway of rRNA processing in the nucleolus and cytosol; rRNA modification in the nucleus and cytosol		2	0	100	100	100	0.473	1.546	3.265	6.64	6.64	6.64	-1.08	0.63	1.71	1e-17	1e-17	1e-17	0.467112	0.148208	0.0707045	2.25143e-17	2.43314e-17	2.35969e-17	0.895945
FALSE	High	Master Protein	Q92667	A-kinase anchor protein 1, mitochondrial [OS=Homo sapiens]	0.001	5.068	3	1	9	1	903	97.3	4.94	13.75	1	coagulation;metabolic process	cytoskeleton;cytosol;endosome	structural molecule activity	Pf00013, Pf00567	8165	ENSG00000121057	AKAP1	A8K8Q1; D3DTZ0; hsa:8165; Q13320; Q92667; Q9BW14	Factors involved in megakaryocyte development and platelet production; Mitochondrial calcium ion transport	G protein signaling pathways	3	0	100	100	100	0.35	0.705	2.015	6.64	6.64	6.64	-1.52	-0.5	1.01	1e-17	1e-17	1e-17	0.223024	0.411856	0.38979	2.25143e-17	2.43314e-17	2.35969e-17	0.682978
FALSE	High	Master Protein	Q8NE01	Metal transporter CNNM3 [OS=Homo sapiens]	0	7.828	8	2	5	2	707	76.1	6.09	5.44	2	conjugation	cytoplasm;cytoskeleton;nucleus	catalytic activity	Pf00571	26505	ENSG00000168763	CNNM3	B3KX67; hsa:26505; Q8NE01; Q8TBV4; Q96IW4; Q9NRK4; Q9NXW6			0	0	100	100	100	0.267	0.606	2.265	6.64	6.64	6.64	-1.9	-0.72	1.18	1e-17	1e-17	1e-17	0.0902558	0.15314	0.247896	2.25143e-17	2.43314e-17	2.35969e-17	0.4149
FALSE	High	Master Protein	P33897	ATP-binding cassette sub-family D member 1 [OS=Homo sapiens]	0	11.105	8	4	15	4	745	82.9	8.95	4.95	4	cell growth;cellular homeostasis;conjugation;defense response;metabolic process	cytoskeleton;cytosol;endosome;extracellular;mitochondrion;nucleus	catalytic activity;structural molecule activity	Pf00005, Pf06472	215	ENSG00000101986	ABCD1	hsa:215; P33897; Q6GTZ2	Class I peroxisomal membrane protein import; ABC transporters in lipid homeostasis; alpha-linolenic acid (ALA) metabolism; Beta-oxidation of very long chain fatty acids; Linoleic acid (LA) metabolism; Defective ABCD1 causes ALD	Vitamin D receptor pathway	7	0	100	100	100	0.461	0.61	1.324	6.64	6.64	6.64	-1.12	-0.71	0.41	1e-17	1e-17	1e-17	0.262068	0.124588	0.906918	2.25143e-17	2.43314e-17	2.35969e-17	0.733523
FALSE	High	Master Protein	O75153	Clustered mitochondria protein homolog [OS=Homo sapiens]	0	30.621	15	10	29	10	1309	146.6	6.13	64.4	10	cell growth	nucleus	RNA binding	Pf12807, Pf13236, Pf13374, Pf13424, Pf15044	23277	ENSG00000132361	CLUH	hsa:23277; O75153; Q6AHY2; Q6P3X7; Q6ZUG8; Q8N4U7; Q9BTA3; Q9H979		Translation factors	1	0	100	100	100	0.392	1.061	2.708	6.64	6.64	6.64	-1.35	0.09	1.44	1e-17	1e-17	1e-17	0.0582233	0.71166	0.0182878	2.25143e-17	2.43314e-17	2.35969e-17	0.310357
FALSE	High	Master Protein	P09234	U1 small nuclear ribonucleoprotein C [OS=Homo sapiens]	0	6.753	8	1	4	1	159	17.4	9.67	15.69	1	cell growth;cellular component movement;cellular homeostasis	membrane	RNA binding;structural molecule activity	Pf06220	6631	ENSG00000124562	SNRPC	hsa:6631; P09234; Q5TAL3	mRNA Splicing - Major Pathway		1	0	100	100	100	0.867	1.052	1.213	6.64	6.64	6.64	-0.21	0.07	0.28	1e-17	1e-17	1e-17	0.874642	0.765436	0.921256	2.25143e-17	2.43314e-17	2.35969e-17	0.986561
FALSE	High	Master Protein	Q8NHV4	Protein NEDD1 [OS=Homo sapiens]	0	10.524	7	2	9	2	660	71.9	7.97	25.09	2	cell differentiation;metabolic process	cytoplasm;cytoskeleton;cytosol;endoplasmic reticulum;membrane		Pf00400	121441	ENSG00000139350	NEDD1	B0AZN0; B4E145; G3V3F1; hsa:121441; Q8NA30; Q8NHV4	Recruitment of NuMA to mitotic centrosomes; Regulation of PLK1 Activity at G2/M Transition; Loss of Nlp from mitotic centrosomes; Recruitment of mitotic centrosome proteins and complexes; Anchoring of the basal body to the plasma membrane; AURKA Activation by TPX2		7	0	100	100	100	0.289	0.43	1.485	6.64	6.64	6.64	-1.79	-1.22	0.57	1e-17	1e-17	1e-17	0.0856305	0.0276271	0.830758	2.25143e-17	2.43314e-17	2.35969e-17	0.401063
FALSE	High	Master Protein	Q99700	Ataxin-2 [OS=Homo sapiens]	0	5.291	2	2	13	2	1313	140.2	9.57	6.99	2	cell growth;cellular component movement;cellular homeostasis;conjugation;metabolic process	cytosol;extracellular;nucleus	antioxidant activity;structural molecule activity	Pf06741, Pf07145, Pf14438	6311	ENSG00000204842	ATXN2	A6NLD4; hsa:6311; Q24JQ7; Q6ZQZ7; Q99493; Q99700		Parkinson's disease pathway; EGF/EGFR signaling pathway	2	0	100	100	100	0.644	0.792	1.231	6.64	6.64	6.64	-0.64	-0.34	0.3	1e-17	1e-17	1e-17	0.71514	0.512155	0.952049	2.25143e-17	2.43314e-17	2.35969e-17	0.977024
FALSE	High	Master Protein	P07205	Phosphoglycerate kinase 2 [OS=Homo sapiens]	0	66.592	20	6	62	1	417	44.8	8.54	230.9	6	cellular homeostasis	cytosol;endoplasmic reticulum	signal transducer activity;structural molecule activity	Pf00162	5232	ENSG00000170950	PGK2	B2R6Y8; hsa:5232; P07205; Q9H107	Gluconeogenesis; Glycolysis	Cori cycle; Clear cell renal cell carcinoma pathways; Glycolysis and gluconeogenesis	5	0	100	100	100	0.621	0.654	1.053	6.64	6.64	6.64	-0.69	-0.61	0.07	1e-17	1e-17	1e-17	0.692974	0.258931	0.696976	2.25143e-17	2.43314e-17	2.35969e-17	0.971932
FALSE	High	Master Protein	Q16890	Tumor protein D53 [OS=Homo sapiens]	0	8.352	12	2	7	2	204	22.4	5.62	22.51	2	cell differentiation;metabolic process	nucleus	structural molecule activity	Pf04201	7164	ENSG00000111907	TPD52L1	A8K757; A8K772; A8MUD2; A8MUJ7; A8MW70; F6V707; hsa:7164; O43397; Q16890; Q5TC99; Q5TDQ0; Q9BUQ6; Q9C054	Golgi Associated Vesicle Biogenesis		1	0	100	100	100	2.619	1.28	0.489	6.64	6.64	6.64	1.39	0.36	-1.03	1e-17	1e-17	1e-17	0.00757311	0.339597	0.0234467	2.25143e-17	2.43314e-17	2.35969e-17	0.0587611
FALSE	High	Master Protein	O43314	Inositol hexakisphosphate and diphosphoinositol-pentakisphosphate kinase 2 [OS=Homo sapiens]	0	8.298	4	2	11	2	1243	140.3	8.22	4.56	2	cellular homeostasis;metabolic process	cytosol	signal transducer activity;structural molecule activity	Pf00328, Pf18086	23262	ENSG00000145725	PPIP5K2	A1NI53; A6NGS8; hsa:23262; O43314; Q8TB50	Synthesis of pyrophosphates in the cytosol		1	0	100	100	100	0.861	0.999	1.161	6.64	6.64	6.64	-0.22	0	0.22	1e-17	1e-17	1e-17	0.718664	0.88169	0.761841	2.25143e-17	2.43314e-17	2.35969e-17	0.977591
FALSE	High	Master Protein	P55327	Tumor protein D52 [OS=Homo sapiens]	0	37.364	60	8	27	8	224	24.3	4.83	74.07	8	conjugation;defense response;metabolic process	extracellular;nucleus	structural molecule activity	Pf04201	7163	ENSG00000076554	TPD52	B7Z414; C9J502; D0UFD1; D0UFD2; D0UFD3; D0UFD4; D0UFD5; E5RKB4; hsa:7163; P55327; Q13056; Q53EK8; Q6FGP3; Q6FGS3; Q86YZ2; Q9UCX8	Golgi Associated Vesicle Biogenesis		1	0	100	100	100	2.431	1.894	0.779	6.64	6.64	6.64	1.28	0.92	-0.36	1e-17	1e-17	1e-17	0.00737561	0.0142071	0.311499	2.25143e-17	2.43314e-17	2.35969e-17	0.0575537
FALSE	High	Master Protein	O60427	Acyl-CoA (8-3)-desaturase [OS=Homo sapiens]	0.003	3.156	5	1	2	1	444	51.9	8.87	4.21	1	cell death;cellular homeostasis;coagulation;metabolic process	cytoskeleton;endosome;extracellular;nucleus	structural molecule activity	Pf00173, Pf00487	3992	ENSG00000149485	FADS1	A8K0I7; B2RAI0; hsa:3992; O60427; Q53GM5; Q8N3A6; Q8NCC7; Q8NCG0; Q96I39; Q96SV3; Q96T10; Q9NRP8; Q9NYX1	PPARA activates gene expression; alpha-linolenic acid (ALA) metabolism; Linoleic acid (LA) metabolism	Cholesterol metabolism with Bloch and Kandutsch-Russell pathways; Omega-3 / omega-6 fatty acid synthesis; Omega-9 fatty acid synthesis; Linoleic acid metabolism affected by coronavirus infection	7	0	100	100	100	0.477	0.821	1.722	6.64	6.64	6.64	-1.07	-0.28	0.78	1e-17	1e-17	1e-17	0.486666	0.714315	0.596854	2.25143e-17	2.43314e-17	2.35969e-17	0.901134
FALSE	Medium	Master Protein	Q5DT21	Serine protease inhibitor Kazal-type 9 [OS=Homo sapiens]	0.023	2.011	14	1	1	1	86	9.7	8.91	2.11	1	metabolic process	cell surface	DNA binding	Pf00050	643394	ENSG00000204909	SPINK9	B2RPN9; hsa:643394; Q5DT21	Formation of the cornified envelope		1	0	0.01	0.072	0.085	100	100	1.174	-6.64	-3.79	-3.56	6.64	6.64	0.23	1e-17	2.29976e-07	4.25415e-06	1e-17	1e-17	0.896029	2.25143e-17	5.37981e-07	9.47646e-06	1.33839e-16
FALSE	High	Master Protein	P19404	NADH dehydrogenase [ubiquinone] flavoprotein 2, mitochondrial [OS=Homo sapiens]	0	6.565	12	2	8	2	249	27.4	8.06	16.77	2	cellular homeostasis;conjugation;defense response	cytoskeleton;cytosol;endosome;membrane	catalytic activity;structural molecule activity	Pf01257	4729	ENSG00000178127	NDUFV2	hsa:4729; P19404; Q9BV41	Complex I biogenesis	Electron transport chain: OXPHOS system in mitochondria; Nonalcoholic fatty liver disease; Oxidative phosphorylation	5	0	100	100	100	0.775	0.695	0.897	6.64	6.64	6.64	-0.37	-0.52	-0.16	1e-17	1e-17	1e-17	0.961421	0.396709	0.484022	2.25143e-17	2.43314e-17	2.35969e-17	0.997943
FALSE	Low	Master Protein	P29377	Protein S100-G [OS=Homo sapiens]	0.05	1.59	15	1	1	1	79	9	4.79	0	1		cell surface;cytoplasm;cytoskeleton;nucleus	structural molecule activity	Pf00036, Pf01023	795	ENSG00000169906	S100G	hsa:795; P29377; Q5JS49		Vitamin D receptor pathway	1	0	0.01	0.042	0.058	100	100	1.376	-6.64	-4.57	-4.11	6.64	6.64	0.46	1e-17	4.91766e-07	4.42623e-06	1e-17	1e-17	0.957538	2.25143e-17	1.14718e-06	9.84957e-06	1.33839e-16
FALSE	High	Master Protein	Q9Y6E0	Serine/threonine-protein kinase 24 [OS=Homo sapiens]	0	21.288	16	5	23	2	443	49.3	5.69	48.27	5	cell organization and biogenesis;cellular homeostasis;coagulation;development;metabolic process	cytoskeleton;cytosol;extracellular;membrane;nucleus	signal transducer activity;structural molecule activity	Pf00069	8428	ENSG00000102572	STK24	hsa:8428; O14840; Q5JV92; Q9Y6E0	Apoptotic cleavage of cellular proteins		2	0	100	100	100	1.396	1.226	0.878	6.64	6.64	6.64	0.48	0.29	-0.19	1e-17	1e-17	1e-17	0.234926	0.452342	0.346593	2.25143e-17	2.43314e-17	2.35969e-17	0.700602
FALSE	High	Master Protein	Q14690	Protein RRP5 homolog [OS=Homo sapiens]	0.001	5.208	2	2	4	2	1871	208.6	8.87	0	2	cellular component movement;cellular homeostasis	cytosol;membrane;nucleus	structural molecule activity	Pf00575, Pf05843	22984	ENSG00000148843	PDCD11	hsa:22984; Q14690; Q2TA92; Q5W093; Q6P2J3; Q86VQ8; Q9H4P1	Major pathway of rRNA processing in the nucleolus and cytosol; rRNA modification in the nucleus and cytosol		2	0	100	100	100	1.262	1.819	1.442	6.64	6.64	6.64	0.34	0.86	0.53	1e-17	1e-17	1e-17	0.287596	0.0452523	0.770076	2.25143e-17	2.43314e-17	2.35969e-17	0.762764
FALSE	High	Master Protein	P61006	Ras-related protein Rab-8A [OS=Homo sapiens]	0	35.695	44	8	58	3	207	23.7	9.07	131.68	8	cell growth;cellular homeostasis;conjugation;defense response;metabolic process	cytoplasm;cytoskeleton;cytosol;endoplasmic reticulum;extracellular;mitochondrion;nucleus	motor activity;structural molecule activity	Pf00071	4218	ENSG00000167461	RAB8A	B4DEK7; hsa:4218; P24407; P61006; Q6FHV5	Translocation of SLC2A4 (GLUT4) to the plasma membrane; Regulation of PLK1 Activity at G2/M Transition; Anchoring of the basal body to the plasma membrane; RAB GEFs exchange GTP for GDP on RABs; VxPx cargo-targeting to cilium; RAB geranylgeranylation; TBC/RABGAPs	Focal adhesion: PI3K-Akt-mTOR-signaling pathway; Ciliary landscape; Joubert syndrome	10	1	100	100	100	1.022	0.411	0.402	6.64	6.64	6.64	0.03	-1.28	-1.31	1e-17	1e-17	1e-17	0.573384	0.00899348	0.00283632	2.25143e-17	2.43314e-17	2.35969e-17	0.939542
FALSE	High	Master Protein	Q969G3	SWI/SNF-related matrix-associated actin-dependent regulator of chromatin subfamily E member 1 [OS=Homo sapiens]	0	12.116	9	3	18	3	411	46.6	4.88	50.51	3	cell growth;defense response;metabolic process	membrane	RNA binding;structural molecule activity	Pf00505	6605	ENSG00000073584	SMARCE1	B3KMC1; B4DFR4; C0IMW4; C0IMW5; C0IMW7; H7C3F6; hsa:6605; O43539; Q969G3	RMTs methylate histone arginines; RUNX1 interacts with co-factors whose precise effect on RUNX1 targets is not known	Androgen receptor signaling pathway; Pathways affected in adenoid cystic carcinoma; Tumor suppressor activity of SMARCB1; Thermogenesis	6	0	100	100	100	0.726	0.934	1.285	6.64	6.64	6.64	-0.46	-0.1	0.36	1e-17	1e-17	1e-17	0.843207	0.91018	0.828536	2.25143e-17	2.43314e-17	2.35969e-17	0.985798
FALSE	High	Master Protein	O95816	BAG family molecular chaperone regulator 2 [OS=Homo sapiens]	0	5.737	21	2	7	2	211	23.8	6.7	13.88	2	cell organization and biogenesis;cellular homeostasis;metabolic process	cytosol;endoplasmic reticulum;nucleus	motor activity;structural molecule activity		9532	ENSG00000112208	BAG2	B4DXE2; hsa:9532; O95816; Q08AS9; Q6FID0	Regulation of HSF1-mediated heat shock response	Malignant pleural mesothelioma	2	0	100	100	100	0.516	0.818	1.584	6.64	6.64	6.64	-0.95	-0.29	0.66	1e-17	1e-17	1e-17	0.445211	0.622223	0.627316	2.25143e-17	2.43314e-17	2.35969e-17	0.881249
FALSE	High	Master Protein	Q9BSD7	Cancer-related nucleoside-triphosphatase [OS=Homo sapiens]	0	10.13	28	3	8	3	190	20.7	9.54	9.75	3			structural molecule activity	Pf03266	84284	ENSG00000135778	NTPCR	hsa:84284; Q9BSD7			0	0	100	100	100	0.557	0.49	0.88	6.64	6.64	6.64	-0.84	-1.03	-0.18	1e-17	1e-17	1e-17	0.345129	0.0260682	0.487335	2.25143e-17	2.43314e-17	2.35969e-17	0.821476
FALSE	High	Master Protein	Q9BV20	Methylthioribose-1-phosphate isomerase [OS=Homo sapiens]	0	18.429	24	4	13	4	369	39.1	6.3	8.22	4	cellular homeostasis	cytosol;membrane;nucleus	structural molecule activity	Pf01008	84245	ENSG00000037757	MRI1	hsa:84245; Q8NDC9; Q9BV20	Methionine salvage pathway	Methionine de novo and salvage pathway	2	0	100	100	100	0.861	1.06	1.231	6.64	6.64	6.64	-0.22	0.08	0.3	1e-17	1e-17	1e-17	0.847787	0.763386	0.909614	2.25143e-17	2.43314e-17	2.35969e-17	0.985798
FALSE	High	Master Protein	P42566	Epidermal growth factor receptor substrate 15 [OS=Homo sapiens]	0	19.869	10	6	14	6	896	98.6	4.64	39.46	6	cell growth;cellular homeostasis;conjugation;metabolic process	cytoplasm;cytoskeleton;cytosol;mitochondrion;nucleus	structural molecule activity		2060	ENSG00000085832	EPS15	B2R8J7; D3DPJ2; hsa:2060; P42566; Q5SRH4	Cargo recognition for clathrin-mediated endocytosis; EGFR downregulation; Negative regulation of MET activity; InlB-mediated entry of Listeria monocytogenes into host cell	VEGFA-VEGFR2 signaling pathway; Ebola virus infection in host; EGF/EGFR signaling pathway	8	0	100	100	100	0.735	0.945	1.286	6.64	6.64	6.64	-0.44	-0.08	0.36	1e-17	1e-17	1e-17	0.820195	0.963196	0.806212	2.25143e-17	2.43314e-17	2.35969e-17	0.985798
FALSE	Medium	Master Protein	Q4G0P3	Hydrocephalus-inducing protein homolog [OS=Homo sapiens]	0.032	1.796	0	1	4	1	5121	575.5	6.06	5.84	1	cell growth;defense response;metabolic process	endoplasmic reticulum		Pf15780, Pf17213	54768	ENSG00000157423; ENSG00000283022	HYDIN	A6NC70; A6NLZ0; B4DQY4; B4DRN4; F5H6V3; hsa:54768; Q4G0P3; Q8N3H8; Q8N3P6; Q8TC08; Q96JG3; Q96SS4; Q9H5U3; Q9H9B8; Q9NTI0; Q9UBE5		Ciliopathies	1	0	100	100	100	0.657	0.879	1.339	6.64	6.64	6.64	-0.61	-0.19	0.42	1e-17	1e-17	1e-17	0.734785	0.730333	0.888607	2.25143e-17	2.43314e-17	2.35969e-17	0.980195
FALSE	High	Master Protein	Q6NUQ1	RAD50-interacting protein 1 [OS=Homo sapiens]	0.001	4.181	3	1	8	1	792	90.6	5.45	7.4	1	cell differentiation;coagulation;conjugation;development;metabolic process	cytoskeleton;cytosol;extracellular		Pf04437	60561	ENSG00000135249	RINT1	hsa:60561; Q6NUQ1; Q75MG9; Q75MH0; Q96IW8; Q9H229; Q9HAD9	COPI-dependent Golgi-to-ER retrograde traffic		1	0	100	100	100	0.671	0.716	1.067	6.64	6.64	6.64	-0.58	-0.48	0.09	1e-17	1e-17	1e-17	0.927296	0.404931	0.634057	2.25143e-17	2.43314e-17	2.35969e-17	0.992849
FALSE	High	Master Protein	Q04724	Transducin-like enhancer protein 1 [OS=Homo sapiens]	0.002	3.513	4	2	5	1	770	83.1	7.24	5.28	2	cell death;defense response;development;metabolic process	cytosol;membrane;nucleus	structural molecule activity	Pf00400, Pf03920	7088	ENSG00000196781	TLE1	A8K495; hsa:7088; Q04724; Q5T3G4; Q969V9	NOTCH1 Intracellular Domain Regulates Transcription; Formation of the beta-catenin:TCF transactivating complex; Deactivation of the beta-catenin transactivating complex; Repression of WNT target genes	Influence of laminopathies on Wnt signaling; Overlap between signal transduction pathways contributing to LMNA laminopathies; Notch signaling pathway	7	0	100		100	0.01	1.159	100	6.64		6.64	-6.64	0.21	6.64	1e-17		1e-17	1e-17	0.550649	1e-17	2.25143e-17		2.35969e-17	1.33839e-16
FALSE	High	Master Protein	Q8IUR7	Armadillo repeat-containing protein 8 [OS=Homo sapiens]	0	31.603	17	7	26	7	673	75.5	6.73	36.11	7	cell organization and biogenesis;cellular homeostasis	cell surface;cytosol;membrane;nucleus		Pf00514	25852	ENSG00000114098	ARMC8	A8K0L2; B7Z441; B7Z453; D3DNE6; F5GWK4; hsa:25852; Q6PIL2; Q8IUR7; Q96D19; Q96HZ5; Q9NV02; Q9NV94; Q9Y4R9	Neutrophil degranulation	Ciliary landscape	2	0	100	100	100	0.532	1.052	1.979	6.64	6.64	6.64	-0.91	0.07	0.98	1e-17	1e-17	1e-17	0.290818	0.727922	0.125469	2.25143e-17	2.43314e-17	2.35969e-17	0.76659
FALSE	High	Master Protein	Q68E01	Integrator complex subunit 3 [OS=Homo sapiens]	0	29.258	12	7	29	7	1043	118	5.8	36.61	7	cell differentiation;cell proliferation;cellular component movement;cellular homeostasis;coagulation;development;metabolic process	membrane;nucleus		Pf10189	65123	ENSG00000143624; ENSG00000262826	INTS3	A8K1W0; B4DQC8; B4E3U9; D3DV57; hsa:65123; Q4G0E5; Q5VUQ5; Q5VUQ6; Q5VUR0; Q5VUR1; Q68DJ1; Q68E01; Q69YR5; Q6AI57; Q6DKG7; Q6MZQ4; Q6MZZ9; Q8NC46; Q8TB23; Q9H6S9	RNA polymerase II transcribes snRNA genes		1	0	100	100	100	0.31	1.048	3.377	6.64	6.64	6.64	-1.69	0.07	1.76	1e-17	1e-17	1e-17	0.0316344	0.753186	0.00475405	2.25143e-17	2.43314e-17	2.35969e-17	0.193419
FALSE	High	Master Protein	Q15036	Sorting nexin-17 [OS=Homo sapiens]	0.001	3.86	4	1	1	1	470	52.9	7.46	2.6	1	cellular homeostasis;conjugation;defense response;development;metabolic process	cytoskeleton;cytosol;extracellular;mitochondrion;nucleus	antioxidant activity;structural molecule activity	Pf00787, Pf18116	9784	ENSG00000115234	SNX17	B4DQM7; hsa:9784; Q15036; Q53HN7; Q6IAS3			0	0	100		100	0.01	1.045	100	6.64		6.64	-6.64	0.06	6.64	1e-17		1e-17	1e-17	0.781975	1e-17	2.25143e-17		2.35969e-17	1.33839e-16
FALSE	High	Master Protein	Q13057	Bifunctional coenzyme A synthase [OS=Homo sapiens]	0	24.027	14	5	16	5	564	62.3	6.99	24.14	5	cellular homeostasis	cytoskeleton;endosome	signal transducer activity;structural molecule activity	Pf01121, Pf01467	80347	ENSG00000068120	COASY	B2RA78; B4DLU0; hsa:80347; Q13057; Q6GS23; Q8NBM7; Q8NEW1; Q8WXD4; Q9NRM3	Coenzyme A biosynthesis	Neurodegeneration with brain iron accumulation (NBIA) subtypes pathway	2	0	100	100	100	0.739	1.006	1.361	6.64	6.64	6.64	-0.44	0.01	0.44	1e-17	1e-17	1e-17	0.838957	0.859177	0.69211	2.25143e-17	2.43314e-17	2.35969e-17	0.985798
FALSE	Medium	Master Protein	P15169	Carboxypeptidase N catalytic chain [OS=Homo sapiens]	0.019	2.097	3	1	3	1	458	52.3	7.34	0	1	cell organization and biogenesis;cellular homeostasis;metabolic process	cell surface	structural molecule activity	Pf00246, Pf13620	1369	ENSG00000120054	CPN1	B1AP59; hsa:1369; P15169	Regulation of Complement cascade	Complement system; Steroid biosynthesis; RAS and bradykinin pathways in COVID-19; Kinin-Kallikrein pathway	5	0	0.01	0.095	0.113	100	100	1.181	-6.64	-3.39	-3.15	6.64	6.64	0.24	1e-17	0.000110224	0.00016735	1e-17	1e-17	0.79605	2.25143e-17	0.000249346	0.000365213	1.33839e-16
FALSE	High	Master Protein	P19634	Sodium/hydrogen exchanger 1 [OS=Homo sapiens]	0	14.093	4	2	9	2	815	90.7	7.21	30.43	2	cell growth;coagulation;conjugation;defense response;development;metabolic process	cytoplasm;cytoskeleton;endosome;extracellular;membrane;nucleus	catalytic activity;structural molecule activity	Pf00999, Pf16644	6548	ENSG00000090020	SLC9A1	B1ALD6; D3DPL4; hsa:6548; P19634; Q96EM2	Hyaluronan uptake and degradation; Sodium/Proton exchangers	Osteoclast signaling; G protein signaling pathways; Gastrin signaling pathway; Regulation of actin cytoskeleton	6	0	100	100	100	0.668	0.579	0.867	6.64	6.64	6.64	-0.58	-0.79	-0.21	1e-17	1e-17	1e-17	0.784762	0.110131	0.403649	2.25143e-17	2.43314e-17	2.35969e-17	0.983539
FALSE	High	Master Protein	P62312	U6 snRNA-associated Sm-like protein LSm6 [OS=Homo sapiens]	0.001	4.49	14	1	5	1	80	9.1	9.58	15.4	1	cellular component movement;cellular homeostasis	cytosol;membrane;nucleus	structural molecule activity	Pf01423	11157	ENSG00000164167	LSM6	hsa:11157; P62312; Q4W5J5; Q9Y4Y8	mRNA Splicing - Major Pathway; mRNA decay by 5' to 3' exoribonuclease		2	0	100	100	100	1.933	1.25	0.647	6.64	6.64	6.64	0.95	0.32	-0.63	1e-17	1e-17	1e-17	0.0466063	0.410777	0.132885	2.25143e-17	2.43314e-17	2.35969e-17	0.264777
FALSE	Medium	Master Protein	Q9H1A4	Anaphase-promoting complex subunit 1 [OS=Homo sapiens]	0.013	2.315	1	1	3	1	1944	216.4	6.3	0	1	cell differentiation;cell organization and biogenesis;cellular homeostasis;metabolic process	cytosol;membrane	structural molecule activity	Pf12859, Pf18122, Pf19521, Pf20518	64682	ENSG00000153107	ANAPC1	hsa:64682; Q2M3H8; Q9BSE6; Q9H1A4; Q9H8D0	Antigen processing: Ubiquitination & Proteasome degradation; APC/C:Cdc20 mediated degradation of Securin; APC/C:Cdh1 mediated degradation of Cdc20 and other APC/C:Cdh1 targeted proteins in late mitosis/early G1; Cdc20:Phospho-APC/C mediated degradation of Cyclin A; Separation of Sister Chromatids; CDK-mediated phosphorylation and removal of Cdc6; Autodegradation of Cdh1 by Cdh1:APC/C; Assembly of…	Cell cycle	19	0	100	100	100	0.632	0.793	1.254	6.64	6.64	6.64	-0.66	-0.33	0.33	1e-17	1e-17	1e-17	0.857934	0.535611	0.892922	2.25143e-17	2.43314e-17	2.35969e-17	0.985798
FALSE	Medium	Master Protein	Q9NRL2	Bromodomain adjacent to zinc finger domain protein 1A [OS=Homo sapiens]	0.019	2.109	1	1	2	1	1556	178.6	6.6	0	1	cell growth;cell organization and biogenesis;cellular homeostasis;metabolic process	membrane	structural molecule activity	Pf00439, Pf00628, Pf02791, Pf10537, Pf15612, Pf15613	11177	ENSG00000198604	BAZ1A	hsa:11177; Q9NRL2; Q9NZ15; Q9P065; Q9UIG1; Q9Y3V3		Ectoderm differentiation	1	0	100		100	0.01	0.785	100	6.64		6.64	-6.64	-0.35	6.64	1e-17		1e-17	1e-17	0.502394	1e-17	2.25143e-17		2.35969e-17	1.33839e-16
FALSE	Low	Master Protein	Q92974	Rho guanine nucleotide exchange factor 2 [OS=Homo sapiens]	0.057	1.525	2	1	2	1	986	111.5	7.27	3.99	1	cell differentiation;cell growth;coagulation;conjugation;defense response;development;metabolic process	cytoplasm;cytoskeleton;cytosol;endoplasmic reticulum;extracellular;nucleus	DNA binding;motor activity;structural molecule activity	Pf00621, Pf17838	9181	ENSG00000116584	ARHGEF2	D3DVA6; hsa:9181; O75142; Q15079; Q5VY92; Q8TDA3; Q8WUG4; Q92974; Q9H023	RHOA GTPase cycle; RHOB GTPase cycle; G alpha (12/13) signalling events; NRAGE signals death through JNK	Pathogenic Escherichia coli infection	5	0	100			0.01	0.01		6.64			-6.64	-6.64		1e-17			1e-17	1e-17		2.25143e-17			1.33839e-16
FALSE	High	Master Protein	O94903	Pyridoxal phosphate homeostasis protein [OS=Homo sapiens]	0	17.754	21	4	20	4	275	30.3	7.5	36.82	4		cytosol;nucleus	structural molecule activity	Pf01168	11212	ENSG00000147471	PLPBP	hsa:11212; O94903; Q6FI94			0	0	100	100	100	1.135	1.182	1.042	6.64	6.64	6.64	0.18	0.24	0.06	1e-17	1e-17	1e-17	0.498079	0.425451	0.818884	2.25143e-17	2.43314e-17	2.35969e-17	0.905961
FALSE	High	Master Protein	Q5JWF2	Guanine nucleotide-binding protein G(s) subunit alpha isoforms XLas [OS=Homo sapiens]	0	48.222	12	10	62	9	1037	111	5.03	124.34	10	cell communication;coagulation;defense response;development;metabolic process	cytoplasm;cytoskeleton;cytosol	antioxidant activity;DNA binding;structural molecule activity	Pf00503	2778	ENSG00000087460	GNAS	A2A2S3; E1P5G3; O75684; O75685; Q5JW67; Q5JWF1; Q5JWF2; Q9NY42	G alpha (i) signalling events; G alpha (z) signalling events; G alpha (s) signalling events; GPER1 signaling; ADORA2B mediated anti-inflammatory cytokines production; Vasopressin regulates renal water homeostasis via Aquaporins; Glucagon-like Peptide-1 (GLP1) regulates insulin secretion; Prostacyclin signalling through prostacyclin receptor; Glucagon-type ligand receptors; PKA activation in gluca…	Thyroid stimulating hormone (TSH) signaling pathway; Endothelin pathways; Corticotropin-releasing hormone signaling pathway; Common pathways underlying drug addiction; Myometrial relaxation and contraction pathways; G protein signaling pathways; Thermogenesis; Hippo signaling regulation pathways; Purinergic signaling; GPR143 in melanocytes and retinal pigment epithelium cells; Prostaglandin and l…	26	0	100	100	100	1.074	0.94	0.876	6.64	6.64	6.64	0.1	-0.09	-0.19	1e-17	1e-17	1e-17	0.481819	0.948227	0.429852	2.25143e-17	2.43314e-17	2.35969e-17	0.901134
FALSE	High	Master Protein	P43155	Carnitine O-acetyltransferase [OS=Homo sapiens]	0.001	4.532	2	1	2	1	626	70.8	8.44	6.32	1	cellular homeostasis	cytoskeleton;cytosol;endosome;extracellular;mitochondrion	structural molecule activity	Pf00755	1384	ENSG00000095321	CRAT	P43155; Q5T952; Q9BW16	Peroxisomal protein import; Beta-oxidation of pristanoyl-CoA	Fatty acid beta-oxidation	3	0	100			0.01	0.01		6.64			-6.64	-6.64		1e-17			1e-17	1e-17		2.25143e-17			1.33839e-16
FALSE	High	Master Protein	Q9NQ50	39S ribosomal protein L40, mitochondrial [OS=Homo sapiens]	0	5.342	8	1	11	1	206	24.5	9.63	22.05	1	metabolic process	cytoskeleton;endosome;Golgi;membrane		Pf09812	64976	ENSG00000185608	MRPL40	B3KVZ7; hsa:64976; O95134; Q9NQ50	Mitochondrial translation elongation; Mitochondrial translation initiation; Mitochondrial translation termination	22q11.2 copy number variation syndrome	4	0	100	100	100	0.612	0.717	1.173	6.64	6.64	6.64	-0.71	-0.48	0.23	1e-17	1e-17	1e-17	0.724169	0.403319	0.906052	2.25143e-17	2.43314e-17	2.35969e-17	0.980195
FALSE	High	Master Protein	Q9UK59	Lariat debranching enzyme [OS=Homo sapiens]	0	8.486	8	3	9	3	544	61.5	5.47	16.51	3	cellular component movement;cellular homeostasis	membrane	structural molecule activity	Pf00149, Pf05011	51163	ENSG00000138231	DBR1	hsa:51163; Q96GH0; Q9NXQ6; Q9UK59			0	0	100	100	100	0.619	0.715	1.155	6.64	6.64	6.64	-0.69	-0.48	0.21	1e-17	1e-17	1e-17	0.517354	0.314058	0.96314	2.25143e-17	2.43314e-17	2.35969e-17	0.919947
FALSE	High	Master Protein	Q9P2R3	Rabankyrin-5 [OS=Homo sapiens]	0.006	2.807	2	1	2	1	1169	128.3	6.1	5.33	1	cell growth;conjugation;metabolic process	cytoskeleton;cytosol;mitochondrion;nucleus	structural molecule activity	Pf00023, Pf00651, Pf01363, Pf12796, Pf13637, Pf13857	51479	ENSG00000185722	ANKFY1	A8KA65; hsa:51479; Q5RKV4; Q9P2R3; Q9ULG5	RHOD GTPase cycle		1	0	100	100	100	0.419	0.692	1.651	6.64	6.64	6.64	-1.25	-0.53	0.72	1e-17	1e-17	1e-17	0.270738	0.318561	0.572682	2.25143e-17	2.43314e-17	2.35969e-17	0.745002
FALSE	High	Master Protein	Q16864	V-type proton ATPase subunit F [OS=Homo sapiens]	0	5.848	24	2	3	2	119	13.4	5.52	2.17	2	conjugation	cytoskeleton;cytosol;mitochondrion	catalytic activity;structural molecule activity	Pf01990	9296	ENSG00000128524	ATP6V1F	C9J2K4; hsa:9296; Q16864; Q6IBA8	Transferrin endocytosis and recycling; Insulin receptor recycling; ROS and RNS production in phagocytes; Amino acids regulate mTORC1; Ion channel transport	Proximal tubule transport	6	0	100	100	100	5.921	1.078	0.182	6.64	6.64	6.64	2.57	0.11	-2.46	1e-17	1e-17	1e-17	0.000188304	0.733302	7.98802e-05	2.25143e-17	2.43314e-17	2.35969e-17	0.00188872
FALSE	High	Master Protein	O15541	E3 ubiquitin-protein ligase RNF113A [OS=Homo sapiens]	0	5.886	4	1	9	1	343	38.8	5.69	23.07	1	cell organization and biogenesis;cell proliferation;cellular component movement;cellular homeostasis;coagulation;metabolic process	membrane	structural molecule activity	Pf00642, Pf13920	7737	ENSG00000125352	RNF113A	B2RBR7; hsa:7737; O15541			0	0	100	100	100	0.778	1.294	1.663	6.64	6.64	6.64	-0.36	0.37	0.73	1e-17	1e-17	1e-17	0.976569	0.399459	0.479585	2.25143e-17	2.43314e-17	2.35969e-17	0.997943
FALSE	High	Master Protein	P08047	Transcription factor Sp1 [OS=Homo sapiens]	0	16.114	7	2	10	2	785	80.6	7.34	43.5	2	coagulation;metabolic process	membrane;nucleus	RNA binding;structural molecule activity	Pf00096	6667	ENSG00000185591	SP1	E4Z9M7; G5E9M8; hsa:6667; P08047; Q86TN8; Q9H3Q5; Q9NR51; Q9NY21; Q9NYE7	PPARA activates gene expression; Activation of gene expression by SREBF (SREBP); SMAD2/SMAD3:SMAD4 heterotrimer regulates transcription; RNA polymerase II transcribes snRNA genes; Estrogen-dependent gene expression; Oncogene Induced Senescence	Androgen receptor signaling pathway; Sterol regulatory element-binding proteins (SREBP) signaling; Leptin signaling pathway; IL-17 signaling pathway; AGE/RAGE pathway; Corticotropin-releasing hormone signaling pathway; Adipogenesis; Constitutive androstane receptor pathway; Estrogen receptor pathway; Nuclear receptors meta-pathway; Myometrial relaxation and contraction pathways; Copper homeostasi…	34	0	100	100	100	0.558	0.801	1.436	6.64	6.64	6.64	-0.84	-0.32	0.52	1e-17	1e-17	1e-17	0.645879	0.664482	0.839018	2.25143e-17	2.43314e-17	2.35969e-17	0.966136
FALSE	High	Master Protein	Q86UE4	Protein LYRIC [OS=Homo sapiens]	0.002	3.362	2	1	3	1	582	63.8	9.32	9.43	1	cell growth;development;metabolic process	cytoplasm;cytoskeleton;extracellular;membrane;nucleus	RNA binding;structural molecule activity	Pf15686	92140	ENSG00000147649	MTDH	hsa:92140; Q05DH2; Q52QU9; Q6PK07; Q86UE4; Q8TCX3		Gastric cancer network 2; ncRNAs involved in Wnt signaling in hepatocellular carcinoma; CCL18 signaling pathway	3	0	100	100	100	1.063	0.818	0.769	6.64	6.64	6.64	0.09	-0.29	-0.38	1e-17	1e-17	1e-17	0.492814	0.669801	0.324828	2.25143e-17	2.43314e-17	2.35969e-17	0.904259
FALSE	High	Master Protein	Q68CZ6	HAUS augmin-like complex subunit 3 [OS=Homo sapiens]	0	5.488	5	2	6	2	603	69.6	5.55	6.23	2	cell differentiation;cell growth;metabolic process	cell surface;cytosol;endoplasmic reticulum;endosome;membrane		Pf14932	79441	ENSG00000214367	HAUS3	B4DF64; hsa:79441; O43606; Q68CZ6; Q8TAZ5; Q9BTJ9	Recruitment of NuMA to mitotic centrosomes; Regulation of PLK1 Activity at G2/M Transition; Loss of Nlp from mitotic centrosomes; Recruitment of mitotic centrosome proteins and complexes; Anchoring of the basal body to the plasma membrane; AURKA Activation by TPX2		7	0	100	100	100	0.843	1.25	1.482	6.64	6.64	6.64	-0.25	0.32	0.57	1e-17	1e-17	1e-17	0.750598	0.450699	0.841003	2.25143e-17	2.43314e-17	2.35969e-17	0.981654
FALSE	High	Master Protein	Q9Y2U8	Inner nuclear membrane protein Man1 [OS=Homo sapiens]	0.002	3.53	2	1	3	1	911	99.9	7.55	8.21	1	cell growth;metabolic process	cytoskeleton;membrane	RNA binding	Pf03020, Pf09402	23592	ENSG00000174106	LEMD3	hsa:23592; Q9NT47; Q9NYA5; Q9Y2U8	RAC1 GTPase cycle; RND2 GTPase cycle; RAC2 GTPase cycle; RAC3 GTPase cycle; RHOD GTPase cycle; RND3 GTPase cycle; RND1 GTPase cycle; RHOG GTPase cycle; Initiation of Nuclear Envelope (NE) Reformation; Depolymerisation of the Nuclear Lamina	Envelope proteins and their potential roles in EDMD physiopathology	12	0	100	100	100	0.462	0.65	1.405	6.64	6.64	6.64	-1.11	-0.62	0.49	1e-17	1e-17	1e-17	0.330603	0.236844	0.824526	2.25143e-17	2.43314e-17	2.35969e-17	0.805403
FALSE	High	Master Protein	Q5BKZ1	DBIRD complex subunit ZNF326 [OS=Homo sapiens]	0	20.564	11	4	22	4	582	65.6	5.15	37.35	4	cellular component movement;cellular homeostasis;metabolic process	membrane;nucleus	RNA binding;structural molecule activity	Pf04988	284695	ENSG00000162664	ZNF326	A8MYX1; B4DLN0; B4E179; hsa:284695; Q5BKZ1; Q5VW93; Q5VW94; Q5VW96; Q5VW97; Q6NSA2; Q7Z638; Q7Z6C2			0	0	100	100	100	0.82	1.226	1.496	6.64	6.64	6.64	-0.29	0.29	0.58	1e-17	1e-17	1e-17	0.965003	0.385202	0.49319	2.25143e-17	2.43314e-17	2.35969e-17	0.997943
FALSE	High	Master Protein	Q96BW9	Phosphatidate cytidylyltransferase, mitochondrial [OS=Homo sapiens]	0	6.98	4	1	7	1	452	51	7.94	19.87	1	cellular homeostasis	cytoskeleton;endosome	structural molecule activity	Pf09139	132001	ENSG00000144559	TAMM41	B4DIY7; C9J2U4; hsa:132001; Q96BW9			0	0	100	100	100	0.957	0.734	0.767	6.64	6.64	6.64	-0.06	-0.45	-0.38	1e-17	1e-17	1e-17	0.638655	0.476672	0.327239	2.25143e-17	2.43314e-17	2.35969e-17	0.962246
FALSE	High	Master Protein	Q9Y446	Plakophilin-3 [OS=Homo sapiens]	0	11.959	11	4	12	4	797	87	9.32	7.43	4	cell communication;cell growth;metabolic process	cytoplasm;cytoskeleton;membrane;nucleus	structural molecule activity	Pf00514	11187	ENSG00000184363	PKP3	F8J390; hsa:11187; Q53EX8; Q9Y446	Formation of the cornified envelope		2	0	100	100	100	0.755	0.86	1.14	6.64	6.64	6.64	-0.41	-0.22	0.19	1e-17	1e-17	1e-17	0.983683	0.74143	0.848049	2.25143e-17	2.43314e-17	2.35969e-17	0.997943
FALSE	High	Master Protein	Q9BSH4	Translational activator of cytochrome c oxidase 1 [OS=Homo sapiens]	0	8.994	17	2	4	2	297	32.5	8.13	4.95	2	cell growth;metabolic process	endosome	protein binding;RNA binding	Pf01709	51204	ENSG00000136463	TACO1	B2RD21; hsa:51204; Q8N3N6; Q9BSH4; Q9UI60	Respiratory electron transport; TP53 Regulates Metabolic Genes; Cytoprotection by HMOX1	Mitochondrial complex IV assembly	4	0	100	100	100	0.893	0.724	0.811	6.64	6.64	6.64	-0.16	-0.47	-0.3	1e-17	1e-17	1e-17	0.926797	0.305241	0.377806	2.25143e-17	2.43314e-17	2.35969e-17	0.992849
FALSE	High	Master Protein	P35249	Replication factor C subunit 4 [OS=Homo sapiens]	0	32.271	19	4	28	4	363	39.7	8.02	67.72	4	cell growth;cell proliferation;cellular homeostasis;coagulation;metabolic process	membrane;nucleus	RNA binding;structural molecule activity	Pf00004, Pf08542	5984	ENSG00000163918	RFC4	B4DM41; D3DNV2; hsa:5984; P35249; Q6FHX7	Regulation of TP53 Activity through Phosphorylation; Activation of ATR in response to replication stress; Processing of DNA double-strand break ends; Presynaptic phase of homologous DNA pairing and strand exchange; G2/M DNA damage checkpoint; Dual incision in TC-NER; Gap-filling DNA repair synthesis and ligation in TC-NER; Termination of translesion DNA synthesis; HDR through Homologous Recombina…	Gastric cancer network 2; Retinoblastoma gene in cancer; DNA replication; Nucleotide excision repair; DNA repair pathways, full network; Nucleotide excision repair in xeroderma pigmentosum ; DNA mismatch repair	27	0	100	100	100	0.633	1.085	1.713	6.64	6.64	6.64	-0.66	0.12	0.78	1e-17	1e-17	1e-17	0.570363	0.666595	0.308546	2.25143e-17	2.43314e-17	2.35969e-17	0.939306
FALSE	Medium	Master Protein	Q9ULX3	RNA-binding protein NOB1 [OS=Homo sapiens]	0.013	2.328	6	1	1	1	412	46.6	7.18	3.54	1	cellular component movement;cellular homeostasis;metabolic process	cytosol;membrane;nucleus	structural molecule activity	Pf08772, Pf15017, Pf17146	28987	ENSG00000141101	NOB1	hsa:28987; Q7L6B7; Q7M4M4; Q7Z4B5; Q9NWB0; Q9ULX3	Major pathway of rRNA processing in the nucleolus and cytosol		1	0	100		100	0.01	0.936	100	6.64		6.64	-6.64	-0.1	6.64	1e-17		1e-17	1e-17	0.997188	1e-17	2.25143e-17		2.35969e-17	1.33839e-16
FALSE	High	Master Protein	P60059	Protein transport protein Sec61 subunit gamma [OS=Homo sapiens]	0.002	3.602	18	1	2	1	68	7.7	9.99	1.95	1	conjugation	cytoskeleton;cytosol;extracellular	catalytic activity	Pf00584	23480	ENSG00000132432	SEC61G	B2R4J0; hsa:23480; P38384; P60059; Q6IB25	ER-Phagosome pathway; SRP-dependent cotranslational protein targeting to membrane; Insertion of tail-anchored proteins into the endoplasmic reticulum membrane		3	0	100	100	100	1.927	1.321	0.685	6.64	6.64	6.64	0.95	0.4	-0.55	1e-17	1e-17	1e-17	0.0749904	0.370848	0.184102	2.25143e-17	2.43314e-17	2.35969e-17	0.369229
FALSE	Medium	Master Protein	P16157	Ankyrin-1 [OS=Homo sapiens]	0.018	2.145	1	1	1	1	1881	206.1	6.01	2.06	1	cell growth;conjugation;development;metabolic process	cytoplasm;cytoskeleton;cytosol;endoplasmic reticulum;extracellular;membrane;nucleus	motor activity;structural molecule activity	Pf00023, Pf00531, Pf00791, Pf17809	286	ENSG00000029534	ANK1	A0PJN8; A6NJ23; E5RFL7; hsa:286; O43400; P16157; Q13768; Q53ER1; Q59FP2; Q8N604; Q99407	COPI-mediated anterograde transport; Neurofascin interactions; CHL1 interactions; Interaction between L1 and Ankyrins; NrCAM interactions		5	0	100	100	100	1.105	1.272	1.151	6.64	6.64	6.64	0.14	0.35	0.2	1e-17	1e-17	1e-17	0.416968	0.397236	0.817345	2.25143e-17	2.43314e-17	2.35969e-17	0.866538
FALSE	High	Master Protein	P05386	60S acidic ribosomal protein P1 [OS=Homo sapiens]	0	15.712	52	2	22	2	114	11.5	4.32	69.51	2	cell organization and biogenesis;cellular homeostasis;metabolic process	cytosol;Golgi	DNA binding;structural molecule activity	Pf00428	6176	ENSG00000137818	RPLP1	A6NIB2; hsa:6176; P05386	Regulation of expression of SLITs and ROBOs; L13a-mediated translational silencing of Ceruloplasmin expression; Formation of a pool of free 40S subunits; GTP hydrolysis and joining of the 60S ribosomal subunit; Major pathway of rRNA processing in the nucleolus and cytosol; SRP-dependent cotranslational protein targeting to membrane; Nonsense Mediated Decay (NMD) enhanced by the Exon Junction Comp…	Cytoplasmic ribosomal proteins	14	0	100	100	100	0.925	1.243	1.345	6.64	6.64	6.64	-0.11	0.31	0.43	1e-17	1e-17	1e-17	0.763108	0.384315	0.715916	2.25143e-17	2.43314e-17	2.35969e-17	0.982432
FALSE	High	Master Protein	Q9BVI4	Nucleolar complex protein 4 homolog [OS=Homo sapiens]	0	15.041	16	4	15	4	516	58.4	7.49	25.2	4	cellular component movement;cellular homeostasis	cytoskeleton;membrane;nucleus		Pf03914	79050	ENSG00000184967; ENSG00000288146	NOC4L	hsa:79050; Q8N2S5; Q96I14; Q9BVI4	Major pathway of rRNA processing in the nucleolus and cytosol; rRNA modification in the nucleus and cytosol		2	0	100	100	100	0.801	1.556	1.943	6.64	6.64	6.64	-0.32	0.64	0.96	1e-17	1e-17	1e-17	0.916529	0.160149	0.266483	2.25143e-17	2.43314e-17	2.35969e-17	0.992849
FALSE	High	Master Protein	O43491	Band 4.1-like protein 2 [OS=Homo sapiens]	0	15.115	8	5	8	5	1005	112.5	5.44	16.13	5	cell differentiation;cell growth;metabolic process	cytoplasm;cytoskeleton;cytosol;endoplasmic reticulum;membrane;nucleus	motor activity;structural molecule activity	Pf00373, Pf04382, Pf05902, Pf08736, Pf09379, Pf09380	2037	ENSG00000079819	EPB41L2	B4DHI8; E9PPD9; hsa:2037; O43491; Q5T4F0; Q68DV2	Neurexins and neuroligins	Splicing factor NOVA regulated synaptic proteins	2	0	100	100	100	0.25	0.708	2.832	6.64	6.64	6.64	-2	-0.5	1.5	1e-17	1e-17	1e-17	0.00456966	0.243065	0.0170079	2.25143e-17	2.43314e-17	2.35969e-17	0.0376279
FALSE	High	Master Protein	Q9HB40	Retinoid-inducible serine carboxypeptidase [OS=Homo sapiens]	0	23.61	12	4	19	4	452	50.8	5.81	46.01	4	cell organization and biogenesis;cellular homeostasis;metabolic process	cytosol	structural molecule activity	Pf00450	59342	ENSG00000121064	SCPEP1	hsa:59342; Q96A94; Q9H3F0; Q9HB40			0	0	100	100	100	0.483	0.496	1.026	6.64	6.64	6.64	-1.05	-1.01	0.04	1e-17	1e-17	1e-17	0.102615	0.0144467	0.832564	2.25143e-17	2.43314e-17	2.35969e-17	0.449905
FALSE	High	Master Protein	Q7Z3B4	Nucleoporin p54 [OS=Homo sapiens]	0	17.181	13	4	20	4	507	55.4	7.02	55.97	4	cell growth;conjugation;metabolic process	cytoskeleton;membrane	structural molecule activity	Pf13874, Pf18437	53371	ENSG00000138750	NUP54	B2RCK7; B4DT35; hsa:53371; Q7Z3B4; Q96EA7; Q9NVL5; Q9P0I1	HCMV Early Events; Transport of Mature mRNA derived from an Intron-Containing Transcript; ISG15 antiviral mechanism; NS1 Mediated Effects on Host Pathways; SUMOylation of DNA replication proteins; Vpr-mediated nuclear import of PICs; snRNP Assembly; Regulation of HSF1-mediated heat shock response; Nuclear Pore Complex (NPC) Disassembly; HCMV Late Events; Transcriptional regulation by small RNAs; …		28	0	100	100	100	1.176	1.797	1.528	6.64	6.64	6.64	0.23	0.85	0.61	1e-17	1e-17	1e-17	0.378367	0.0782646	0.627199	2.25143e-17	2.43314e-17	2.35969e-17	0.844373
FALSE	High	Master Protein	Q16740	ATP-dependent Clp protease proteolytic subunit, mitochondrial [OS=Homo sapiens]	0	6.066	5	1	1	1	277	30.2	8.09	3.4	1	cell organization and biogenesis;cellular homeostasis	endosome;nucleus	structural molecule activity	Pf00574	8192	ENSG00000125656	CLPP	B2R4W5; hsa:8192; Q16740			0	0	100	100	100	1.277	0.711	0.557	6.64	6.64	6.64	0.35	-0.49	-0.85	1e-17	1e-17	1e-17	0.319498	0.391829	0.101187	2.25143e-17	2.43314e-17	2.35969e-17	0.794903
FALSE	High	Master Protein	Q96EY5	Multivesicular body subunit 12A [OS=Homo sapiens]	0.006	2.875	10	1	1	1	273	28.8	8.91	2.11	1	cell growth;cell organization and biogenesis;cellular homeostasis;conjugation;metabolic process	cytoskeleton;cytosol;endoplasmic reticulum;extracellular;membrane;mitochondrion;nucleus	structural molecule activity	Pf10240	93343	ENSG00000141971	MVB12A	hsa:93343; Q96EY5; Q96I18	Endosomal Sorting Complex Required For Transport (ESCRT); Membrane binding and targetting of GAG proteins; Late endosomal microautophagy; Budding and maturation of HIV virion; HCMV Late Events	7q11.23 copy number variation syndrome	6	0	100	100	100	0.983	1.09	1.108	6.64	6.64	6.64	-0.02	0.12	0.15	1e-17	1e-17	1e-17	0.547935	0.69629	0.691437	2.25143e-17	2.43314e-17	2.35969e-17	0.932289
FALSE	High	Master Protein	Q13416	Origin recognition complex subunit 2 [OS=Homo sapiens]	0.002	3.478	3	1	2	1	577	65.9	6.51	0	1	cell proliferation;cellular homeostasis;metabolic process	endoplasmic reticulum;membrane;nucleus	RNA binding	Pf04084	4999	ENSG00000115942	ORC2	hsa:4999; Q13204; Q13416; Q53TX5	Orc1 removal from chromatin; Activation of ATR in response to replication stress; Activation of the pre-replicative complex; E2F-enabled inhibition of pre-replication complex formation; Assembly of the ORC complex at the origin of replication; CDC6 association with the ORC:origin complex	Cell cycle; G1 to S cell cycle control; DNA replication	10	0	100	100	100	0.573	1.032	1.803	6.64	6.64	6.64	-0.8	0.05	0.85	1e-17	1e-17	1e-17	0.587819	0.857164	0.4202	2.25143e-17	2.43314e-17	2.35969e-17	0.943551
FALSE	Medium	Master Protein	Q96NT0	Coiled-coil domain-containing protein 115 [OS=Homo sapiens]	0.024	1.917	4	1	1	1	180	19.7	6.95	0	1	cell growth;cell organization and biogenesis;cellular homeostasis;metabolic process	cytoskeleton;extracellular;mitochondrion	structural molecule activity		84317	ENSG00000136710	CCDC115	B4DJ47; hsa:84317; Q96NT0; Q9BR88	RHOA GTPase cycle		1	0	100	100	100	1.339	1.077	0.805	6.64	6.64	6.64	0.42	0.11	-0.31	1e-17	1e-17	1e-17	0.246153	0.722654	0.300894	2.25143e-17	2.43314e-17	2.35969e-17	0.715994
FALSE	Medium	Master Protein	Q9H425	Uncharacterized protein C1orf198 [OS=Homo sapiens]	0.045	1.668	4	1	1	1	327	36.3	5.72	2.72	1		cytosol		Pf15797	84886	ENSG00000119280	C1orf198	A8K8R8; B3KTW1; G5EA08; hsa:84886; Q9H425			0	0	100	100	100	0.848	1.284	1.514	6.64	6.64	6.64	-0.24	0.36	0.6	1e-17	1e-17	1e-17	0.822353	0.411261	0.701842	2.25143e-17	2.43314e-17	2.35969e-17	0.985798
FALSE	High	Master Protein	Q9H6Z4	Ran-binding protein 3 [OS=Homo sapiens]	0	14.685	7	3	20	3	567	60.2	4.78	54.19	3	conjugation;metabolic process	membrane;nucleus	structural molecule activity	Pf00638	8498	ENSG00000031823	RANBP3	B2RAT8; hsa:8498; O60405; O75759; O75760; Q9BT47; Q9H6Z4; Q9UG74			0	0	100	100	100	0.929	1.172	1.262	6.64	6.64	6.64	-0.11	0.23	0.34	1e-17	1e-17	1e-17	0.862622	0.451226	0.720425	2.25143e-17	2.43314e-17	2.35969e-17	0.985798
FALSE	High	Master Protein	Q9UMR2	ATP-dependent RNA helicase DDX19B [OS=Homo sapiens]	0	34.125	32	9	28	2	479	53.9	6.3	57.14	9	cellular homeostasis;conjugation	membrane;nucleus	RNA binding;structural molecule activity	Pf00270, Pf00271	11269	ENSG00000157349	DDX19B	B3KNE9; B4DXS6; E7EMK4; hsa:11269; Q6FIB7; Q6IAE0; Q96KE7; Q9H0U0; Q9UMR2			0	0	100	100	100	0.738	0.685	0.928	6.64	6.64	6.64	-0.44	-0.55	-0.11	1e-17	1e-17	1e-17	0.96039	0.385477	0.526404	2.25143e-17	2.43314e-17	2.35969e-17	0.997943
FALSE	High	Master Protein	P16219	Short-chain specific acyl-CoA dehydrogenase, mitochondrial [OS=Homo sapiens]	0.006	2.781	3	1	4	1	412	44.3	7.99	9.21	1	cellular homeostasis	endoplasmic reticulum;endosome;membrane	structural molecule activity	Pf00441, Pf02770, Pf02771	35	ENSG00000122971	ACADS	hsa:35; P16219; P78331	Beta oxidation of hexanoyl-CoA to butanoyl-CoA; Beta oxidation of butanoyl-CoA to acetyl-CoA	Fatty acid beta-oxidation; Mitochondrial long chain fatty acid beta-oxidation; IL-18 signaling pathway	5	0	100	100	100	1.753	0.998	0.569	6.64	6.64	6.64	0.81	0	-0.81	1e-17	1e-17	1e-17	0.0809897	0.936792	0.0649817	2.25143e-17	2.43314e-17	2.35969e-17	0.389021
FALSE	High	Master Protein	Q14318	Peptidyl-prolyl cis-trans isomerase FKBP8 [OS=Homo sapiens]	0	27.198	22	5	20	5	412	44.5	4.84	63.06	5	cell organization and biogenesis;cellular homeostasis;defense response;development;metabolic process	cytoskeleton;cytosol;endosome;extracellular;nucleus	structural molecule activity	Pf00254	23770	ENSG00000105701	FKBP8	C8C9T5; hsa:23770; Q14318; Q53GU3; Q7Z349; Q86YK6	Ub-specific processing proteases		1	0	100	100	100	1.052	0.896	0.852	6.64	6.64	6.64	0.07	-0.16	-0.23	1e-17	1e-17	1e-17	0.614557	0.825981	0.474207	2.25143e-17	2.43314e-17	2.35969e-17	0.953258
FALSE	High	Master Protein	Q8IZL8	Proline-, glutamic acid- and leucine-rich protein 1 [OS=Homo sapiens]	0	15.681	6	3	27	3	1130	119.6	4.34	41.81	3	metabolic process	membrane;nucleus	structural molecule activity	Pf08166, Pf08167	27043	ENSG00000141456	PELP1	hsa:27043; O15450; Q5EGN3; Q6NTE6; Q8IZL8; Q96FT1; Q9BU60	Major pathway of rRNA processing in the nucleolus and cytosol; PTK6 Expression		2	0	100	100	100	0.623	1.089	1.747	6.64	6.64	6.64	-0.68	0.12	0.8	1e-17	1e-17	1e-17	0.652731	0.795905	0.433817	2.25143e-17	2.43314e-17	2.35969e-17	0.966783
FALSE	High	Master Protein	Q01968	Inositol polyphosphate 5-phosphatase OCRL [OS=Homo sapiens]	0	5.279	5	2	6	2	901	104.1	6.55	0	2	cell growth;cellular homeostasis;development;metabolic process	cytoplasm;cytoskeleton;cytosol;extracellular;membrane;mitochondrion;nucleus	DNA binding;structural molecule activity	Pf00620, Pf03372, Pf16726	4952	ENSG00000122126	OCRL	A6NKI1; A8KAP2; B7ZLX2; hsa:4952; O60800; Q01968; Q15684; Q15774; Q4VY09; Q4VY10; Q5JQF1; Q5JQF2; Q9UJG5; Q9UMA5	RAC3 GTPase cycle; Golgi Associated Vesicle Biogenesis; RHOJ GTPase cycle; Clathrin-mediated endocytosis; Synthesis of IP3 and IP4 in the cytosol; Synthesis of PIPs at the plasma membrane; Synthesis of PIPs at the Golgi membrane; Synthesis of IP2, IP, and Ins in the cytosol	VEGFA-VEGFR2 signaling pathway; Ciliopathies	10	0	100	100	100	1.287	0.895	0.695	6.64	6.64	6.64	0.36	-0.16	-0.52	1e-17	1e-17	1e-17	0.289064	0.891398	0.235834	2.25143e-17	2.43314e-17	2.35969e-17	0.764331
FALSE	High	Master Protein	Q7KZI7	Serine/threonine-protein kinase MARK2 [OS=Homo sapiens]	0	7.874	6	3	4	3	788	87.9	9.72	4.45	3	cell death;cell growth;cell organization and biogenesis;cellular homeostasis;defense response;development;metabolic process	cytoplasm;cytoskeleton;endoplasmic reticulum;endosome;membrane;nucleus	DNA binding;motor activity;signal transducer activity;structural molecule activity	Pf00069, Pf00627, Pf02149	2011	ENSG00000072518	MARK2	hsa:2011; Q15449; Q15524; Q5XGA3; Q68A18; Q7KZI7; Q96HB3; Q96RG0		Microtubule cytoskeleton regulation; Complement system in neuronal development and plasticity	2	0	100	100	100	0.473	0.626	1.323	6.64	6.64	6.64	-1.08	-0.68	0.4	1e-17	1e-17	1e-17	0.327938	0.195772	0.876546	2.25143e-17	2.43314e-17	2.35969e-17	0.803155
FALSE	High	Master Protein	O14545	TRAF-type zinc finger domain-containing protein 1 [OS=Homo sapiens]	0	5.651	2	1	3	1	582	64.8	5.29	5.38	1	metabolic process		structural molecule activity		10906	ENSG00000135148	TRAFD1	A8K5L6; B4DI89; hsa:10906; O14545			0	0	100	100	100	0.971	1.274	1.312	6.64	6.64	6.64	-0.04	0.35	0.39	1e-17	1e-17	1e-17	0.557892	0.416734	0.931565	2.25143e-17	2.43314e-17	2.35969e-17	0.936609
FALSE	High	Master Protein	Q9Y399	28S ribosomal protein S2, mitochondrial [OS=Homo sapiens]	0	12.049	23	4	13	4	296	33.2	9.26	17.82	4	cell growth;cell organization and biogenesis;cellular homeostasis	cytoskeleton;endosome;Golgi	structural molecule activity	Pf00318	51116	ENSG00000122140	MRPS2	hsa:51116; Q5T899; Q9BSQ4; Q9Y399	Mitochondrial translation elongation; Mitochondrial translation initiation; Mitochondrial translation termination		3	0	100	100	100	0.753	0.831	1.104	6.64	6.64	6.64	-0.41	-0.27	0.14	1e-17	1e-17	1e-17	0.869754	0.623495	0.873422	2.25143e-17	2.43314e-17	2.35969e-17	0.986561
FALSE	High	Master Protein	O00422	Histone deacetylase complex subunit SAP18 [OS=Homo sapiens]	0	26.483	41	5	24	5	153	17.6	9.35	45.83	5	cellular component movement;cellular homeostasis;metabolic process	cytosol;membrane;nucleus	structural molecule activity	Pf06487	10284	ENSG00000150459	SAP18	B2R494; hsa:10284; O00422; Q2TTR4; Q6IAW9; Q8N606; Q9UF14; X6RAL5	Potential therapeutics for SARS; HDACs deacetylate histones; NoRC negatively regulates rRNA expression	Hedgehog signaling pathway	4	0	100	100	100	1.107	1.108	1.001	6.64	6.64	6.64	0.15	0.15	0	1e-17	1e-17	1e-17	0.470569	0.624631	0.706319	2.25143e-17	2.43314e-17	2.35969e-17	0.895945
FALSE	High	Master Protein	Q14160	Protein scribble homolog [OS=Homo sapiens]	0	22.805	7	5	19	4	1630	174.8	5.07	48.34	5	cell communication;cell death;cell differentiation;cell growth;coagulation;conjugation;defense response;metabolic process	cytoplasm;cytoskeleton;membrane;nucleus		Pf00595, Pf13855	23513	ENSG00000180900	SCRIB	hsa:23513; Q14160; Q6P496; Q7Z5D1; Q8WWV8; Q96C69; Q96GG1	Asymmetric localization of PCP proteins; RND2 GTPase cycle; RND3 GTPase cycle; CDC42 GTPase cycle; RHOJ GTPase cycle; RHOQ GTPase cycle	Thyroid stimulating hormone (TSH) signaling pathway; Complement system in neuronal development and plasticity	8	0	100	100	100	0.896	0.751	0.838	6.64	6.64	6.64	-0.16	-0.41	-0.25	1e-17	1e-17	1e-17	0.737885	0.410734	0.271874	2.25143e-17	2.43314e-17	2.35969e-17	0.980195
FALSE	High	Master Protein	Q9UBB9	Tuftelin-interacting protein 11 [OS=Homo sapiens]	0.006	2.775	2	1	6	1	837	96.8	5.67	12.19	1	cell growth;cell proliferation;cellular component movement;cellular homeostasis;coagulation;defense response;metabolic process	chromosome;membrane;nucleus	RNA binding	Pf01585, Pf07842, Pf12457	24144	ENSG00000100109	TFIP11	hsa:24144; O95908; Q20WL0; Q5H8V8; Q9UBB9; Q9UGV7; Q9Y2Q8	mRNA Splicing - Major Pathway		1	0	100		100	0.01	0.609	100	6.64		6.64	-6.64	-0.71	6.64	1e-17		1e-17	1e-17	0.229839	1e-17	2.25143e-17		2.35969e-17	1.33839e-16
FALSE	High	Master Protein	Q9Y5R8	Trafficking protein particle complex subunit 1 [OS=Homo sapiens]	0.002	3.696	7	1	1	1	145	16.8	9.16	2.74	1	conjugation	cell surface;cytosol;extracellular;mitochondrion;nucleus		Pf04099	58485	ENSG00000170043	TRAPPC1	D3DTR0; hsa:58485; Q9Y5R8	Neutrophil degranulation; COPII-mediated vesicle transport; RAB GEFs exchange GTP for GDP on RABs		3	0	100	100	100	0.784	1.193	1.522	6.64	6.64	6.64	-0.35	0.25	0.61	1e-17	1e-17	1e-17	0.927414	0.56111	0.673639	2.25143e-17	2.43314e-17	2.35969e-17	0.992849
FALSE	Medium	Master Protein	Q86U86	Protein polybromo-1 [OS=Homo sapiens]	0.014	2.252	1	1	2	1	1689	192.8	6.89	0	1	cell differentiation;cell growth;metabolic process	membrane	RNA binding;structural molecule activity	Pf00439, Pf00505, Pf01426	55193	ENSG00000163939	PBRM1	A1L381; A1L382; A4FUJ7; hsa:55193; Q1RMD1; Q1RMD2; Q86U86; Q96MS2; Q9H2T3; Q9H2T4; Q9H2T5; Q9H301; Q9H314	RMTs methylate histone arginines; RUNX1 interacts with co-factors whose precise effect on RUNX1 targets is not known	Clear cell renal cell carcinoma pathways	3	0	100	100	100	0.716	0.679	0.949	6.64	6.64	6.64	-0.48	-0.56	-0.08	1e-17	1e-17	1e-17	0.977448	0.282753	0.428646	2.25143e-17	2.43314e-17	2.35969e-17	0.997943
FALSE	High	Master Protein	Q9Y2Q5	Ragulator complex protein LAMTOR2 [OS=Homo sapiens]	0.002	3.271	10	1	6	1	125	13.5	5.4	8.05	1	metabolic process	cytoplasm;cytoskeleton;mitochondrion	DNA binding;structural molecule activity	Pf03259	28956	ENSG00000116586	LAMTOR2	hsa:28956; Q5VY97; Q5VY98; Q5VY99; Q9Y2Q5	Neutrophil degranulation; TP53 Regulates Metabolic Genes; MAP2K and MAPK activation; Amino acids regulate mTORC1; Macroautophagy; Energy dependent regulation of mTOR by LKB1-AMPK; Regulation of PTEN gene transcription; mTORC1-mediated signalling		9	0	100	100	100	1.182	1.074	0.909	6.64	6.64	6.64	0.24	0.1	-0.14	1e-17	1e-17	1e-17	0.367971	0.699718	0.53009	2.25143e-17	2.43314e-17	2.35969e-17	0.836906
FALSE	High	Master Protein	P21953	2-oxoisovalerate dehydrogenase subunit beta, mitochondrial [OS=Homo sapiens]	0	8.587	9	2	9	2	392	43.1	6.29	10.6	2	cellular homeostasis;metabolic process	endosome;membrane	structural molecule activity	Pf02779, Pf02780	594	ENSG00000083123	BCKDHB	hsa:594; P21953; Q5T2J3; Q9BQL0	Branched-chain amino acid catabolism; Glyoxylate metabolism and glycine degradation		2	0	100	100	100	0.773	0.387	0.501	6.64	6.64	6.64	-0.37	-1.37	-1	1e-17	1e-17	1e-17	0.924921	0.0110732	0.060312	2.25143e-17	2.43314e-17	2.35969e-17	0.992849
FALSE	High	Master Protein	Q9BRT6	Protein LLP homolog [OS=Homo sapiens]	0	9.012	29	2	12	2	129	15.2	10.37	25.59	2	cell growth;defense response;metabolic process	membrane;nucleus	structural molecule activity	Pf10169	84298	ENSG00000139233	LLPH	hsa:84298; Q3B766; Q9BRT6			0	0	100	100	100	0.64	1.295	2.024	6.64	6.64	6.64	-0.64	0.37	1.02	1e-17	1e-17	1e-17	0.576124	0.285076	0.117766	2.25143e-17	2.43314e-17	2.35969e-17	0.939542
FALSE	High	Master Protein	O95149	Snurportin-1 [OS=Homo sapiens]	0	5.906	8	1	9	1	360	41.1	6.64	19.11	1	conjugation	cytosol;membrane	RNA binding;structural molecule activity	Pf11538	10073	ENSG00000169371	SNUPN	A6NE34; A8K0B0; D3DW76; hsa:10073; O95149	snRNP Assembly		1	0	100	100	100	0.354	1.22	3.444	6.64	6.64	6.64	-1.5	0.29	1.78	1e-17	1e-17	1e-17	0.225386	0.457717	0.0487463	2.25143e-17	2.43314e-17	2.35969e-17	0.685675
FALSE	High	Master Protein	Q9NVU0	DNA-directed RNA polymerase III subunit RPC5 [OS=Homo sapiens]	0	5.588	3	1	7	1	708	79.8	6.47	4.89	1	cellular component movement;cellular homeostasis;coagulation	cytosol;membrane	structural molecule activity	Pf04801, Pf19725	55718	ENSG00000058600; ENSG00000284282	POLR3E	B4DL24; B4DUP6; H3BT11; hsa:55718; Q9BWF7; Q9H8W8; Q9H907; Q9NVU0; Q9P276	RNA Polymerase III Abortive And Retractive Initiation; RNA Polymerase III Transcription Initiation From Type 1 Promoter; RNA Polymerase III Transcription Initiation From Type 2 Promoter; RNA Polymerase III Transcription Initiation From Type 3 Promoter; RNA Polymerase III Transcription Termination; Cytosolic sensors of pathogen-associated DNA ; RNA Polymerase III Chain Elongation	Pyrimidine metabolism; Eukaryotic transcription initiation; Cytosolic DNA-sensing pathway	10	0	100	100	100	0.265	0.731	2.761	6.64	6.64	6.64	-1.92	-0.45	1.47	1e-17	1e-17	1e-17	0.0843835	0.398211	0.111284	2.25143e-17	2.43314e-17	2.35969e-17	0.397374
FALSE	Medium	Master Protein	Q86WQ0	Nuclear receptor 2C2-associated protein [OS=Homo sapiens]	0.011	2.419	17	1	2	1	139	15.9	6.16	2.31	1		membrane			126382	ENSG00000184162	NR2C2AP	A6NGP7; B4DW92; hsa:126382; Q86WQ0	Nuclear Receptor transcription pathway		1	0	100	100	100	1.082	1.081	0.999	6.64	6.64	6.64	0.11	0.11	0	1e-17	1e-17	1e-17	0.461259	0.766378	0.612626	2.25143e-17	2.43314e-17	2.35969e-17	0.892891
FALSE	High	Master Protein	P52948	Nuclear pore complex protein Nup98-Nup96 [OS=Homo sapiens]	0.002	3.662	1	1	3	1	1817	197.5	6.4	3.12	1	cell growth;cell organization and biogenesis;conjugation;metabolic process	cytoskeleton;cytosol;membrane;nucleus	catalytic activity;RNA binding;structural molecule activity	Pf04096, Pf12110	4928	ENSG00000110713	NUP98	hsa:4928; P52948; Q8IUT2; Q8WYB0; Q96E54; Q9H3Q4; Q9NT02; Q9UF57; Q9UHX0; Q9Y6J4; Q9Y6J5		SARS-CoV-2 innate immunity evasion and cell-specific immune response	1	0	100	100	100	1.422	0.94	0.661	6.64	6.64	6.64	0.51	-0.09	-0.6	1e-17	1e-17	1e-17	0.203703	0.925007	0.144594	2.25143e-17	2.43314e-17	2.35969e-17	0.659232
FALSE	High	Master Protein	Q9H8H3	Methyltransferase-like protein 7A [OS=Homo sapiens]	0	27.371	27	4	22	4	244	28.3	8.38	77.78	4	cellular homeostasis	cell surface;cytoskeleton;extracellular;nucleus	structural molecule activity	Pf08241	25840	ENSG00000185432	METTL7A	hsa:25840; Q9H7R3; Q9H8H3; Q9UHZ7; Q9Y422	Neutrophil degranulation		1	0	100	100	100	0.865	0.726	0.839	6.64	6.64	6.64	-0.21	-0.46	-0.25	1e-17	1e-17	1e-17	0.95104	0.188922	0.431734	2.25143e-17	2.43314e-17	2.35969e-17	0.996316
FALSE	High	Master Protein	Q13614	Myotubularin-related protein 2 [OS=Homo sapiens]	0.005	2.939	3	1	1	1	643	73.3	7.4	0	1	cell growth;cell organization and biogenesis;cellular homeostasis;defense response;metabolic process	cytoplasm;cytoskeleton;cytosol;extracellular;membrane;mitochondrion;nucleus	structural molecule activity	Pf02893, Pf06602	8898	ENSG00000087053	MTMR2	A6NN98; hsa:8898; Q13614; Q9UPS9	Synthesis of PIPs at the plasma membrane; Synthesis of PIPs at the early endosome membrane; Synthesis of PIPs at the late endosome membrane; Synthesis of PIPs at the ER membrane	Intracellular trafficking proteins involved in CMT neuropathy	5	0	100	100	100	0.738	0.904	1.224	6.64	6.64	6.64	-0.44	-0.15	0.29	1e-17	1e-17	1e-17	0.93052	0.827176	0.868327	2.25143e-17	2.43314e-17	2.35969e-17	0.992849
FALSE	High	Master Protein	Q9BV86	N-terminal Xaa-Pro-Lys N-methyltransferase 1 [OS=Homo sapiens]	0	13.407	22	4	7	4	223	25.4	5.52	12.42	4	cell differentiation;cell growth;cell organization and biogenesis;cellular homeostasis;metabolic process	cytosol;membrane;nucleus	structural molecule activity	Pf05891	28989	ENSG00000148335	NTMT1	A8K4J2; A8K8G7; hsa:28989; Q5SZB9; Q9BV86; Q9UI28			0	0	100	100	100	0.793	1.166	1.47	6.64	6.64	6.64	-0.33	0.22	0.56	1e-17	1e-17	1e-17	0.981643	0.513828	0.579413	2.25143e-17	2.43314e-17	2.35969e-17	0.997943
FALSE	High	Master Protein	Q9NRF9	DNA polymerase epsilon subunit 3 [OS=Homo sapiens]	0.006	2.838	12	1	4	1	147	16.8	4.74	2.08	1	cell growth;cell organization and biogenesis;cell proliferation;cellular homeostasis;coagulation	membrane	RNA binding;structural molecule activity	Pf00808	54107	ENSG00000148229	POLE3	hsa:54107; Q5W0U1; Q8N758; Q8NCE5; Q9NR32; Q9NRF9	Activation of the pre-replicative complex; Dual incision in TC-NER; Gap-filling DNA repair synthesis and ligation in TC-NER; Termination of translesion DNA synthesis; HDR through Homologous Recombination (HRR); Recognition of DNA damage by PCNA-containing replication complex; PCNA-Dependent Long Patch Base Excision Repair; Dual Incision in GG-NER; Gap-filling DNA repair synthesis and ligation in …	Pyrimidine metabolism; Base excision repair; Nucleotide excision repair; DNA repair pathways, full network; Nucleotide excision repair in xeroderma pigmentosum ; DNA mismatch repair	16	0	100	100	100	0.694	1.283	1.847	6.64	6.64	6.64	-0.53	0.36	0.89	1e-17	1e-17	1e-17	0.979765	0.390848	0.498853	2.25143e-17	2.43314e-17	2.35969e-17	0.997943
FALSE	High	Master Protein	Q86VN1	Vacuolar protein-sorting-associated protein 36 [OS=Homo sapiens]	0	6.826	7	2	7	2	386	43.8	7.2	18.41	2	cell growth;cell organization and biogenesis;cellular homeostasis;conjugation	cytoskeleton;cytosol;membrane;mitochondrion	structural molecule activity	Pf04157, Pf11605	51028	ENSG00000136100	VPS36	A8K125; hsa:51028; Q3ZCV7; Q5H9S1; Q5VXB6; Q86VN1; Q9H8Z5; Q9Y3E3	Endosomal Sorting Complex Required For Transport (ESCRT); HCMV Late Events	Network map of SARS-CoV-2 signaling pathway	3	0	100	100	100	1.078	1.24	1.151	6.64	6.64	6.64	0.11	0.31	0.2	1e-17	1e-17	1e-17	0.46961	0.425679	0.892136	2.25143e-17	2.43314e-17	2.35969e-17	0.895945
FALSE	High	Master Protein	P04278	Sex hormone-binding globulin [OS=Homo sapiens]	0	5.878	4	1	4	1	402	43.8	6.71	9.11	1		cell surface	structural molecule activity	Pf00054	6462	ENSG00000129214	SHBG	B0FWH4; E9PGW1; F5H5Z8; hsa:6462; I3L1N7; P04278; P14689; Q16616; Q3MIL0; Q6ISD2			0	0	0.01	0.01	0.01				-6.64	-6.64	-6.64				1e-17	1e-17	1e-17				2.25143e-17	2.43314e-17	2.35969e-17
FALSE	High	Master Protein	Q5T6F2	Ubiquitin-associated protein 2 [OS=Homo sapiens]	0	6.002	6	3	4	3	1119	117	7.34	6.44	3	metabolic process	membrane;nucleus		Pf12478	55833	ENSG00000137073	UBAP2	hsa:55833; Q2M2R4; Q5JV03; Q5T6F2; Q6PK34; Q8NC94; Q9P237			0	0	100	100	100	0.304	0.684	2.248	6.64	6.64	6.64	-1.72	-0.55	1.17	1e-17	1e-17	1e-17	0.0506505	0.252403	0.169783	2.25143e-17	2.43314e-17	2.35969e-17	0.281442
FALSE	High	Master Protein	O75208	Ubiquinone biosynthesis protein COQ9, mitochondrial [OS=Homo sapiens]	0	9.447	22	3	9	3	318	35.5	5.94	5.28	3	cellular homeostasis	cytoskeleton;endosome	structural molecule activity	Pf08511	57017	ENSG00000088682	COQ9	A8K3L2; hsa:57017; O75208; Q7L5V7; Q7Z5T6; Q8NBL4; Q9NTJ2; Q9P056	Ubiquinol biosynthesis		1	0	100	100	100	1.091	0.881	0.808	6.64	6.64	6.64	0.13	-0.18	-0.31	1e-17	1e-17	1e-17	0.470222	0.875809	0.37739	2.25143e-17	2.43314e-17	2.35969e-17	0.895945
FALSE	High	Master Protein	P57076	Cilia- and flagella-associated protein 298 [OS=Homo sapiens]	0.001	4.804	9	1	2	1	290	33.2	7.44	5.76	1	cell growth;metabolic process	endoplasmic reticulum;nucleus		Pf11069	56683	ENSG00000159079	CFAP298	hsa:56683; P57076; Q53FH0		Ciliopathies	1	0	100		100	0.01	1.519	100	6.64		6.64	-6.64	0.6	6.64	1e-17		1e-17	1e-17	0.178059	1e-17	2.25143e-17		2.35969e-17	1.33839e-16
FALSE	High	Master Protein	Q6NUQ4	Transmembrane protein 214 [OS=Homo sapiens]	0	17.223	13	6	35	6	689	77.1	9.14	60.04	6	metabolic process	cytoskeleton;cytosol;endoplasmic reticulum;extracellular		Pf10151	54867	ENSG00000119777	TMEM214	A6NNF2; B3KUI9; B5MCD8; D6W547; hsa:54867; Q53SW1; Q69YH4; Q6NUQ4; Q8NC45; Q8WZ37; Q9NXH2			0	0	100	100	100	0.793	1.056	1.332	6.64	6.64	6.64	-0.33	0.08	0.41	1e-17	1e-17	1e-17	0.869414	0.713755	0.651516	2.25143e-17	2.43314e-17	2.35969e-17	0.986561
FALSE	High	Master Protein	P05546	Heparin cofactor 2 [OS=Homo sapiens]	0	7.741	4	2	5	2	499	57	6.9	0	2	coagulation;metabolic process	cell surface;extracellular	DNA binding;structural molecule activity	Pf00079	3053	ENSG00000099937	SERPIND1	B2RAI1; D3DX34; hsa:3053; P05546; Q6IBZ5	Regulation of Insulin-like Growth Factor (IGF) transport and uptake by Insulin-like Growth Factor Binding Proteins (IGFBPs); Post-translational protein phosphorylation; Intrinsic Pathway of Fibrin Clot Formation; Common Pathway of Fibrin Clot Formation	22q11.2 copy number variation syndrome; Complement and coagulation cascades	6	0	0.01	0.059	0.051	25.931	22.634	0.873	-6.64	-4.09	-4.29	4.7	4.5	-0.2	1e-17	1.58515e-08	2.29893e-09	2.15161e-13	1e-17	0.466744	2.25143e-17	3.77138e-08	5.30818e-09	2.8101e-12
FALSE	High	Master Protein	Q15386	Ubiquitin-protein ligase E3C [OS=Homo sapiens]	0.001	4.641	4	2	10	2	1083	123.8	6.71	9.17	2	cell organization and biogenesis;cellular homeostasis	membrane;nucleus	structural molecule activity	Pf00632	9690	ENSG00000009335	UBE3C	A4D235; A6NCP3; hsa:9690; Q15386; Q8TC15; Q96CR4; Q9UDU3	Antigen processing: Ubiquitination & Proteasome degradation		1	0	100	100	100	0.573	0.772	1.347	6.64	6.64	6.64	-0.8	-0.37	0.43	1e-17	1e-17	1e-17	0.712947	0.576409	0.992652	2.25143e-17	2.43314e-17	2.35969e-17	0.9763
FALSE	High	Master Protein	Q9C0E2	Exportin-4 [OS=Homo sapiens]	0	19.392	6	3	5	3	1151	130.1	5.05	10.77	3	conjugation;metabolic process	cytosol;membrane;nucleus	structural molecule activity		64328	ENSG00000132953	XPO4	hsa:64328; Q5VUZ5; Q8N3V6; Q9C0E2; Q9H934		eIF5A regulation in response to inhibition of the nuclear export system	1	0	100	100	100	0.538	0.63	1.17	6.64	6.64	6.64	-0.89	-0.67	0.23	1e-17	1e-17	1e-17	0.649659	0.191013	0.750435	2.25143e-17	2.43314e-17	2.35969e-17	0.966783
FALSE	Medium	Master Protein	Q92608	Dedicator of cytokinesis protein 2 [OS=Homo sapiens]	0.016	2.195	1	1	2	1	1830	211.8	6.87	2.14	1	cell differentiation;cell growth;conjugation;defense response;development;metabolic process	cell surface;cytosol;endoplasmic reticulum;nucleus	antioxidant activity;DNA binding	Pf06920, Pf07653, Pf14429, Pf16172, Pf20421, Pf20422	1794	ENSG00000134516	DOCK2	hsa:1794; Q2M3I0; Q92608; Q96AK7	Neutrophil degranulation; RAC1 GTPase cycle; RHOA GTPase cycle; RAC2 GTPase cycle; RHOG GTPase cycle; Factors involved in megakaryocyte development and platelet production; Nef and signal transduction	Chemokine signaling pathway	8	0	0.01	0.054	0.087	100	100	1.618	-6.64	-4.21	-3.52	6.64	6.64	0.69	1e-17	5.39541e-08	6.30854e-06	1e-17	1e-17	0.634415	2.25143e-17	1.27497e-07	1.40237e-05	1.33839e-16
FALSE	High	Master Protein	P04049	RAF proto-oncogene serine/threonine-protein kinase [OS=Homo sapiens]	0	5.734	3	2	4	1	648	73	9.2	7.91	2	cell death;cell growth;cell organization and biogenesis;cellular homeostasis;coagulation;conjugation;defense response;development;metabolic process	cytoplasm;cytoskeleton;cytosol;endosome;extracellular;membrane;nucleus	DNA binding;signal transducer activity;structural molecule activity	Pf00130, Pf02196, Pf07714	5894	ENSG00000132155	RAF1	B0LPH8; B2R5N3; hsa:5894; P04049; Q15278; Q9UC20	Signaling by BRAF and RAF1 fusions; GP1b-IX-V activation signalling; Signaling by moderate kinase activity BRAF mutants; Paradoxical activation of RAF signaling by kinase inactive BRAF; Signaling downstream of RAS mutants; Signaling by RAF1 mutants; MAP2K and MAPK activation; Signaling by high-kinase activity BRAF mutants; Stimuli-sensing channels; RAF activation; SHOC2 M1731 mutant abolishes MRA…	IL-5 signaling pathway; MicroRNAs in cardiomyocyte hypertrophy; Integrin-mediated cell adhesion; Thyroid stimulating hormone (TSH) signaling pathway; Leptin signaling pathway; Follicle stimulating hormone (FSH) signaling pathway; TNF-related weak inducer of apoptosis (TWEAK) signaling pathway; Prolactin signaling pathway; Alzheimer's disease and miRNA effects; Endothelin pathways; Pilocytic astro…	93	1	100	100	100	0.611	1.139	1.864	6.64	6.64	6.64	-0.71	0.19	0.9	1e-17	1e-17	1e-17	0.69776	0.65395	0.376588	2.25143e-17	2.43314e-17	2.35969e-17	0.973043
FALSE	High	Master Protein	O60231	Pre-mRNA-splicing factor ATP-dependent RNA helicase DHX16 [OS=Homo sapiens]	0	6.463	3	2	11	2	1041	119.2	6.8	2.45	2	cellular component movement;cellular homeostasis	membrane	structural molecule activity	Pf00270, Pf00271, Pf04408, Pf07717	8449	ENSG00000204560; ENSG00000206486; ENSG00000226171; ENSG00000231377; ENSG00000233049; ENSG00000233418; ENSG00000233561	DHX16	hsa:8449; O60231; O60322; Q5JP45; Q969X7; Q96QC1	mRNA Splicing - Major Pathway	mRNA processing	2	0	100	100	100	0.434	0.975	2.246	6.64	6.64	6.64	-1.2	-0.04	1.17	1e-17	1e-17	1e-17	0.27561	0.990402	0.215289	2.25143e-17	2.43314e-17	2.35969e-17	0.752185
FALSE	High	Master Protein	Q15370	Elongin-B [OS=Homo sapiens]	0	19.306	70	4	23	4	118	13.1	4.88	44.84	4	cell growth;cell organization and biogenesis;cellular component movement;cellular homeostasis;metabolic process	cytosol;membrane;nucleus	structural molecule activity	Pf00240	6923	ENSG00000103363	ELOB	B7WPD3; hsa:6923; Q15370	Antigen processing: Ubiquitination & Proteasome degradation; Oxygen-dependent proline hydroxylation of Hypoxia-inducible Factor Alpha; Vif-mediated degradation of APOBEC3G; Neddylation; Regulation of expression of SLITs and ROBOs; RNA Polymerase II Pre-transcription Events; TP53 Regulates Transcription of DNA Repair Genes; Inactivation of CSF3 (G-CSF) signaling; Formation of RNA Pol II elongation…	Dual hijack model of Vif in HIV infection; Type 2 papillary renal cell carcinoma; Hijack of ubiquitination by SARS-CoV-2; Modulators of TCR signaling and T cell activation	21	0	100	100	100	0.724	0.962	1.328	6.64	6.64	6.64	-0.47	-0.06	0.41	1e-17	1e-17	1e-17	0.79384	0.98874	0.716215	2.25143e-17	2.43314e-17	2.35969e-17	0.985495
FALSE	Medium	Master Protein	Q96DT6	Cysteine protease ATG4C [OS=Homo sapiens]	0.018	2.134	4	1	1	1	458	52.5	5.97	0	1	cell organization and biogenesis;cellular homeostasis;conjugation	nucleus	structural molecule activity	Pf03416, Pf20166	84938	ENSG00000125703	ATG4C	A6NLR8; D3DQ58; hsa:84938; Q96DT6; Q96K04	Macroautophagy		1	0	100	100	100	1.101	1.178	1.07	6.64	6.64	6.64	0.14	0.24	0.1	1e-17	1e-17	1e-17	0.414687	0.531545	0.622724	2.25143e-17	2.43314e-17	2.35969e-17	0.866538
FALSE	High	Master Protein	Q8N8N7	Prostaglandin reductase 2 [OS=Homo sapiens]	0	14.755	33	5	18	5	351	38.5	5.41	39.16	5	cellular homeostasis	nucleus	structural molecule activity	Pf00107, Pf16884	145482	ENSG00000140043	PTGR2	hsa:145482; Q3L8A4; Q6MZH8; Q8N8N7	Synthesis of Prostaglandins (PG) and Thromboxanes (TX)	Eicosanoid metabolism via cyclooxygenases (COX); Eicosanoid metabolism via lipooxygenases (LOX)	3	0	100	100	100	1.195	1.166	0.976	6.64	6.64	6.64	0.26	0.22	-0.03	1e-17	1e-17	1e-17	0.359391	0.544361	0.648568	2.25143e-17	2.43314e-17	2.35969e-17	0.830574
FALSE	Medium	Master Protein	Q8NAA5	Leucine-rich repeat-containing protein 75A [OS=Homo sapiens]	0.034	1.777	6	1	1	1	344	37.8	8.44	0	1		nucleus			388341	ENSG00000181350	LRRC75A	hsa:388341; Q8NAA5			0	0	100	100	100	0.776	0.905	1.166	6.64	6.64	6.64	-0.37	-0.14	0.22	1e-17	1e-17	1e-17	0.836113	0.927298	0.827785	2.25143e-17	2.43314e-17	2.35969e-17	0.985798
FALSE	High	Master Protein	P62304	Small nuclear ribonucleoprotein E [OS=Homo sapiens]	0	10.034	45	2	17	2	92	10.8	9.44	35.03	2	cell growth;cellular component movement;cellular homeostasis;metabolic process	cytosol;membrane;nucleus	RNA binding	Pf01423	6635	ENSG00000182004	SNRPE	B2R5B9; hsa:6635; P08578; P62304; Q15498; Q5BKT2	RNA Polymerase II Transcription Termination; mRNA Splicing - Major Pathway; mRNA Splicing - Minor Pathway; snRNP Assembly; SLBP independent Processing of Histone Pre-mRNAs; SLBP Dependent Processing of Replication-Dependent Histone Pre-mRNAs	mRNA processing	7	0	100	100	100	0.736	0.873	1.186	6.64	6.64	6.64	-0.44	-0.2	0.25	1e-17	1e-17	1e-17	0.869647	0.721473	0.999405	2.25143e-17	2.43314e-17	2.35969e-17	0.986561
FALSE	Medium	Master Protein	Q8N3K9	Cardiomyopathy-associated protein 5 [OS=Homo sapiens]	0.02	2.076	0	1	1	1	4069	448.9	4.78	0	1		cytoplasm;cytoskeleton;cytosol;endoplasmic reticulum;extracellular;membrane;nucleus		Pf00041	202333	ENSG00000164309	CMYA5	A0PJB7; hsa:202333; Q05CT4; Q2NKX1; Q2T9G9; Q69YQ8; Q69YQ9; Q6P517; Q6P5U3; Q7Z4I1; Q86T34; Q86T49; Q8N3K9; Q8N3S4; Q8N3S7; Q8NAG8; Q9UK88			0	0	0.01	0.01	0.01				-6.64	-6.64	-6.64				1e-17	1e-17	1e-17				2.25143e-17	2.43314e-17	2.35969e-17
FALSE	Medium	Master Protein	O75175	CCR4-NOT transcription complex subunit 3 [OS=Homo sapiens]	0.023	1.988	2	1	1	1	753	81.8	6.2	0	1	cellular component movement;cellular homeostasis;defense response;metabolic process	cytosol;membrane;nucleus		Pf04065, Pf04153	4849	ENSG00000088038; ENSG00000273943; ENSG00000274176; ENSG00000274616; ENSG00000274941; ENSG00000275979; ENSG00000276082; ENSG00000277114; ENSG00000277600; ENSG00000277615	CNOT3	hsa:4849; O75175; Q9NZN7; Q9UF76	Deadenylation of mRNA; TP53 regulates transcription of additional cell cycle genes whose exact role in the p53 pathway remain uncertain		2	0	100	100	100	0.95	0.856	0.901	6.64	6.64	6.64	-0.07	-0.22	-0.15	1e-17	1e-17	1e-17	0.588259	0.767527	0.400005	2.25143e-17	2.43314e-17	2.35969e-17	0.943575
FALSE	High	Master Protein	Q15054	DNA polymerase delta subunit 3 [OS=Homo sapiens]	0.001	4.485	3	1	9	1	466	51.4	9.35	21.7	1	cell proliferation;cellular homeostasis;coagulation	membrane;nucleus	structural molecule activity	Pf09507	10714	ENSG00000077514	POLD3	B7ZAI6; hsa:10714; Q15054; Q32MZ9; Q32N00	Termination of translesion DNA synthesis; HDR through Homologous Recombination (HRR); Dual incision in TC-NER; Gap-filling DNA repair synthesis and ligation in TC-NER; Recognition of DNA damage by PCNA-containing replication complex; Dual Incision in GG-NER; Gap-filling DNA repair synthesis and ligation in GG-NER; PCNA-Dependent Long Patch Base Excision Repair; Polymerase switching on the C-stran…	Homologous recombination; Retinoblastoma gene in cancer; Pyrimidine metabolism; DNA replication; Base excision repair; Nucleotide excision repair; DNA repair pathways, full network; Nucleotide excision repair in xeroderma pigmentosum ; DNA mismatch repair	26	0	100	100	100	0.591	1.126	1.905	6.64	6.64	6.64	-0.76	0.17	0.93	1e-17	1e-17	1e-17	0.666588	0.681197	0.354476	2.25143e-17	2.43314e-17	2.35969e-17	0.968724
FALSE	High	Master Protein	Q99504	Eyes absent homolog 3 [OS=Homo sapiens]	0	5.677	8	2	7	2	573	62.6	5.21	4.98	2	cell organization and biogenesis;cell proliferation;cellular homeostasis;coagulation;metabolic process	endoplasmic reticulum;membrane;nucleus	structural molecule activity		2140	ENSG00000158161	EYA3	A8K190; B4DIR7; B4DNZ7; hsa:2140; O95463; Q8IVX7; Q99504; Q99813	Recruitment and ATM-mediated phosphorylation of repair and signaling proteins at DNA double strand breaks		1	0	100	100	100	0.587	0.947	1.612	6.64	6.64	6.64	-0.77	-0.08	0.69	1e-17	1e-17	1e-17	0.740385	0.999468	0.703605	2.25143e-17	2.43314e-17	2.35969e-17	0.980602
FALSE	High	Master Protein	P32321	Deoxycytidylate deaminase [OS=Homo sapiens]	0	10.698	16	2	12	2	178	20	7.56	32.59	2	cellular homeostasis	cytosol	structural molecule activity	Pf00383	1635	ENSG00000129187	DCTD	B2R836; D3DP49; D3DP50; hsa:1635; P32321; Q5M7Z8; Q9BVD8	Interconversion of nucleotide di- and triphosphates	Pyrimidine metabolism	2	0	100	100	100	0.818	0.794	0.971	6.64	6.64	6.64	-0.29	-0.33	-0.04	1e-17	1e-17	1e-17	0.978225	0.531476	0.622446	2.25143e-17	2.43314e-17	2.35969e-17	0.997943
FALSE	High	Master Protein	Q9BS26	Endoplasmic reticulum resident protein 44 [OS=Homo sapiens]	0	7.007	12	2	2	2	406	46.9	5.26	4.41	2	cell organization and biogenesis;cellular homeostasis;coagulation;metabolic process	cell surface;cytoskeleton;extracellular;nucleus	structural molecule activity	Pf00085, Pf13848	23071	ENSG00000023318	ERP44	hsa:23071; O60319; Q4VXC1; Q5VWZ7; Q6UW14; Q8WX67; Q9BS26	Neutrophil degranulation		1	0	100	100	100	0.698	0.758	1.085	6.64	6.64	6.64	-0.52	-0.4	0.12	1e-17	1e-17	1e-17	0.996901	0.538786	0.685787	2.25143e-17	2.43314e-17	2.35969e-17	0.999445
FALSE	High	Master Protein	O95757	Heat shock 70 kDa protein 4L [OS=Homo sapiens]	0	27.406	9	5	11	1	839	94.5	5.88	35.41	5	coagulation;metabolic process	cytosol;membrane;nucleus	structural molecule activity	Pf00012	22824	ENSG00000164070	HSPA4L	A2ICT2; hsa:22824; O95757; Q4W5M5; Q8IWA2	Regulation of HSF1-mediated heat shock response		1	0	100	100	100	1.654	1.389	0.839	6.64	6.64	6.64	0.73	0.47	-0.25	1e-17	1e-17	1e-17	0.119762	0.279309	0.387954	2.25143e-17	2.43314e-17	2.35969e-17	0.494963
FALSE	High	Master Protein	Q6NXG1	Epithelial splicing regulatory protein 1 [OS=Homo sapiens]	0	16.518	12	4	19	3	681	75.5	6.68	27.23	4	cellular component movement;cellular homeostasis;metabolic process	membrane;nucleus	RNA binding		54845	ENSG00000104413	ESRP1	A6NHA8; A8MPX1; E9PB47; hsa:54845; Q2M2B0; Q499G3; Q6NXG1; Q6PJ86; Q9NXL8	Signaling by BRAF and RAF1 fusions; FGFR2 alternative splicing		2	0	100	100	100	0.173	0.798	4.611	6.64	6.64	6.64	-2.53	-0.33	2.2	1e-17	1e-17	1e-17	0.0038943	0.588503	0.0135405	2.25143e-17	2.43314e-17	2.35969e-17	0.0324375
FALSE	High	Master Protein	Q96MF7	E3 SUMO-protein ligase NSE2 [OS=Homo sapiens]	0.002	3.295	4	1	5	1	247	27.9	7.74	7.26	1	cell differentiation;cell growth;cell organization and biogenesis;cell proliferation;cellular homeostasis;coagulation;metabolic process	membrane;nucleus	structural molecule activity	Pf11789	286053	ENSG00000156831	NSMCE2	hsa:286053; Q8N549; Q96MF7	SUMOylation of DNA damage response and repair proteins		1	0	100		100	0.01	1.402	100	6.64		6.64	-6.64	0.49	6.64	1e-17		1e-17	1e-17	0.262485	1e-17	2.25143e-17		2.35969e-17	1.33839e-16
FALSE	High	Master Protein	Q9H1K4	Mitochondrial glutamate carrier 2 [OS=Homo sapiens]	0	6.096	11	2	5	2	315	33.8	9.25	2.44	2	cellular homeostasis;conjugation	cytoskeleton;endosome	catalytic activity	Pf00153	83733	ENSG00000182902	SLC25A18	hsa:83733; Q9H1K4	Organic anion transporters		1	0	100	100	100	0.424	0.441	1.041	6.64	6.64	6.64	-1.24	-1.18	0.06	1e-17	1e-17	1e-17	0.350237	0.0305228	0.573085	2.25143e-17	2.43314e-17	2.35969e-17	0.826885
FALSE	Medium	Master Protein	O94952	F-box only protein 21 [OS=Homo sapiens]	0.048	1.625	3	1	3	1	628	72.2	6.09	0	1	cell organization and biogenesis;cellular homeostasis	cytosol;nucleus	RNA binding;structural molecule activity	Pf08755, Pf13369	23014	ENSG00000135108	FBXO21	B3KMF0; hsa:23014; O94952; Q5BJG0; Q9H087	Antigen processing: Ubiquitination & Proteasome degradation; Neddylation		2	0	100	100	100	0.92	1.085	1.179	6.64	6.64	6.64	-0.12	0.12	0.24	1e-17	1e-17	1e-17	0.637405	0.71909	0.745657	2.25143e-17	2.43314e-17	2.35969e-17	0.962246
FALSE	High	Master Protein	Q9BVC3	Sister chromatid cohesion protein DCC1 [OS=Homo sapiens]	0	5.376	7	1	5	1	393	44.8	5.17	8.71	1	cell differentiation;cell growth;cell organization and biogenesis;cellular homeostasis;metabolic process	membrane;nucleus	RNA binding	Pf09724	79075	ENSG00000136982	DSCC1	hsa:79075; Q969N5; Q9BVC3	Polymerase switching on the C-strand of the telomere	Gastric cancer network 2	2	0	100	100	100	0.423	1.217	2.876	6.64	6.64	6.64	-1.24	0.28	1.52	1e-17	1e-17	1e-17	0.384179	0.498372	0.107297	2.25143e-17	2.43314e-17	2.35969e-17	0.849951
FALSE	High	Master Protein	Q15773	Myeloid leukemia factor 2 [OS=Homo sapiens]	0.001	3.867	18	2	2	2	248	28.1	6.9	0	2	metabolic process	membrane;nucleus		Pf10248	8079	ENSG00000089693	MLF2	hsa:8079; Q15773			0	0	100	100	100	1.255	1.361	1.085	6.64	6.64	6.64	0.33	0.45	0.12	1e-17	1e-17	1e-17	0.297001	0.318304	0.677647	2.25143e-17	2.43314e-17	2.35969e-17	0.772821
FALSE	High	Master Protein	Q16537	Serine/threonine-protein phosphatase 2A 56 kDa regulatory subunit epsilon isoform [OS=Homo sapiens]	0	9.386	9	3	15	3	467	54.7	6.95	34.54	3	cell organization and biogenesis;cellular homeostasis;development;metabolic process	cytosol;membrane;nucleus	DNA binding	Pf01603	5529	ENSG00000154001	PPP2R5E	A4FU37; B7ZAW5; B7ZKK8; B7ZKK9; hsa:5529; J3KQN6; Q16537; Q52LW4	Separation of Sister Chromatids; Resolution of Sister Chromatid Cohesion; RHO GTPases Activate Formins; EML4 and NUDC in mitotic spindle formation; PI5P, PP2A and IER3 Regulate PI3K/AKT Signaling; Amplification of signal from unattached kinetochores via a MAD2 inhibitory signal; RAF activation; Negative regulation of MAPK pathway; CTLA4 inhibitory signaling; Disassembly of the destruction complex…	Focal adhesion: PI3K-Akt-mTOR-signaling pathway; Wnt signaling pathway and pluripotency; PI3K-Akt signaling pathway; Glycogen synthesis and degradation; Cohesin complex - Cornelia de Lange syndrome; DNA damage response (only ATM dependent)	28	0	100	100	100	1.001	1.361	1.36	6.64	6.64	6.64	0	0.44	0.44	1e-17	1e-17	1e-17	0.561011	0.287107	0.78086	2.25143e-17	2.43314e-17	2.35969e-17	0.937839
FALSE	High	Master Protein	Q9Y6Y0	Influenza virus NS1A-binding protein [OS=Homo sapiens]	0.001	4.999	7	2	5	2	642	71.7	5.53	2.23	2	cellular component movement;cellular homeostasis;metabolic process	cytosol;endoplasmic reticulum;membrane;nucleus		Pf00651, Pf01344, Pf07707	10625	ENSG00000116679	IVNS1ABP	A8K8R6; hsa:10625; Q1G4T6; Q1G4T7; Q5TF75; Q6NW38; Q7LCG2; Q9NZX0; Q9Y480; Q9Y6Y0			0	0	100	100	100	0.996	3.454	3.47	6.64	6.64	6.64	-0.01	1.79	1.79	1e-17	1e-17	1e-17	0.527434	0.00040097	0.0448143	2.25143e-17	2.43314e-17	2.35969e-17	0.923908
FALSE	High	Master Protein	P34949	Mannose-6-phosphate isomerase [OS=Homo sapiens]	0	27.986	18	5	15	5	423	46.6	5.95	34.42	5	cell organization and biogenesis;cellular homeostasis	cytosol	structural molecule activity	Pf01238, Pf20511, Pf20512	4351	ENSG00000178802	MPI	A8K8K9; hsa:4351; P34949; Q96AB0	Synthesis of GDP-mannose; Defective MPI causes MPI-CDG		2	0	100	100	100	5.815	3.563	0.613	6.64	6.64	6.64	2.54	1.83	-0.71	1e-17	1e-17	1e-17	3.22833e-06	1.83071e-05	0.0988679	2.25143e-17	2.43314e-17	2.35969e-17	3.57848e-05
FALSE	High	Master Protein	Q9UDR5	Alpha-aminoadipic semialdehyde synthase, mitochondrial [OS=Homo sapiens]	0.001	3.738	2	1	6	1	926	102.1	6.64	0	1	cellular homeostasis;metabolic process	cytosol;endosome;membrane;nucleus	structural molecule activity	Pf01262, Pf03435, Pf05222, Pf16653	10157	ENSG00000008311	AASS	hsa:10157; O95462; Q9UDR5	Lysine catabolism	Vitamin B6-dependent and responsive disorders	2	0	100	100	100	0.341	0.459	1.346	6.64	6.64	6.64	-1.55	-1.12	0.43	1e-17	1e-17	1e-17	0.191611	0.0459078	0.988302	2.25143e-17	2.43314e-17	2.35969e-17	0.643617
FALSE	High	Master Protein	Q16877	6-phosphofructo-2-kinase/fructose-2,6-bisphosphatase 4 [OS=Homo sapiens]	0	9.989	13	5	6	5	469	54	6.62	10.25	5	cellular homeostasis	cytosol	signal transducer activity;structural molecule activity	Pf00300, Pf01591	5210	ENSG00000114268	PFKFB4	hsa:5210; Q16877; Q5S3G5; Q5XLC2; Q64EX5	Regulation of glycolysis by fructose 2,6-bisphosphate metabolism	Focal adhesion: PI3K-Akt-mTOR-signaling pathway; PI3K/AKT/mTOR - VitD3 signaling	3	0	100	100	100	1.357	1.911	1.408	6.64	6.64	6.64	0.44	0.93	0.49	1e-17	1e-17	1e-17	0.245145	0.014939	0.536641	2.25143e-17	2.43314e-17	2.35969e-17	0.714843
FALSE	High	Master Protein	P50148	Guanine nucleotide-binding protein G(q) subunit alpha [OS=Homo sapiens]	0	24.176	24	6	29	2	359	42.1	5.68	47.95	6	cell death;coagulation;development;metabolic process	cytoplasm;cytoskeleton;extracellular;membrane;nucleus	antioxidant activity;DNA binding;structural molecule activity	Pf00503	2776	ENSG00000156052	GNAQ	hsa:2776; O15108; P50148; Q13462; Q6NT27; Q92471; Q9BZB9	G alpha (q) signalling events; Thrombin signalling through proteinase activated receptors (PARs); G-protein activation; ADP signalling through P2Y purinoceptor 1; Thromboxane signalling through TP receptor; Cooperation of PDCL (PhLP1) and TRiC/CCT in G-protein beta folding; Fatty Acids bound to GPR40 (FFAR1) regulate insulin secretion; PLC beta mediated events; Acetylcholine regulates insulin sec…	Thyroid stimulating hormone (TSH) signaling pathway; Microtubule cytoskeleton regulation; Alzheimer's disease and miRNA effects; Corticotropin-releasing hormone signaling pathway; Myometrial relaxation and contraction pathways; G protein signaling pathways; Circadian rhythm genes; Cell-type dependent selectivity of CCK2R signaling; Hippo signaling regulation pathways; Gastrin signaling pathway; P…	27	3	100	100	100	0.861	0.491	0.57	6.64	6.64	6.64	-0.22	-1.03	-0.81	1e-17	1e-17	1e-17	0.9724	0.0122435	0.0600137	2.25143e-17	2.43314e-17	2.35969e-17	0.997943
FALSE	Medium	Master Protein	Q96AY4	Tetratricopeptide repeat protein 28 [OS=Homo sapiens]	0.05	1.603	1	1	1	1	2481	270.7	6.89	0	1	cell differentiation;metabolic process	endoplasmic reticulum;nucleus	structural molecule activity	Pf12770, Pf13176, Pf13424	23331	ENSG00000100154	TTC28	hsa:23331; K7ZRV2; O95928; O95929; Q5W189; Q96AY4; Q9NTE4; Q9UG31; Q9UGG5; Q9UPV8; Q9Y3S5			0	0	100	100	100	0.468	0.787	1.682	6.64	6.64	6.64	-1.1	-0.35	0.75	1e-17	1e-17	1e-17	0.199016	0.49278	0.365374	2.25143e-17	2.43314e-17	2.35969e-17	0.654755
FALSE	High	Master Protein	Q8TED1	Probable glutathione peroxidase 8 [OS=Homo sapiens]	0	6.725	14	2	9	2	209	23.9	9.35	14.51	2	coagulation;metabolic process	cytoskeleton;extracellular	structural molecule activity	Pf00255	493869	ENSG00000164294	GPX8	hsa:493869; Q8TED1	Detoxification of Reactive Oxygen Species		1	0	100	100	100	0.927	0.828	0.893	6.64	6.64	6.64	-0.11	-0.27	-0.16	1e-17	1e-17	1e-17	0.692752	0.605017	0.382337	2.25143e-17	2.43314e-17	2.35969e-17	0.971932
FALSE	High	Master Protein	O43237	Cytoplasmic dynein 1 light intermediate chain 2 [OS=Homo sapiens]	0	18.364	21	5	28	5	492	54.1	6.38	22.76	5	cell growth;metabolic process	cytosol;endoplasmic reticulum;mitochondrion;nucleus	structural molecule activity	Pf05783	1783	ENSG00000135720	DYNC1LI2	A8K6V1; B4DZP4; hsa:1783; O43237; Q8TAT3	Separation of Sister Chromatids; MHC class II antigen presentation; Resolution of Sister Chromatid Cohesion; HSP90 chaperone cycle for steroid hormone receptors (SHR) in the presence of ligand; RHO GTPases Activate Formins; COPI-mediated anterograde transport; COPI-independent Golgi-to-ER retrograde traffic; HCMV Early Events; Aggrephagy; EML4 and NUDC in mitotic spindle formation; Amplification …	Intraflagellar transport proteins binding to dynein	13	0	100	100	100	1.031	0.852	0.826	6.64	6.64	6.64	0.04	-0.23	-0.28	1e-17	1e-17	1e-17	0.551195	0.682711	0.34703	2.25143e-17	2.43314e-17	2.35969e-17	0.932719
FALSE	High	Master Protein	Q9H061	Transmembrane protein 126A [OS=Homo sapiens]	0	18.185	29	3	21	3	195	21.5	9.26	48.66	3	cell growth;defense response	cytoskeleton;endosome		Pf07114	84233	ENSG00000171202	TMEM126A	B2R570; E9PI16; hsa:84233; Q9H061			0	0	100	100	100	0.669	0.767	1.146	6.64	6.64	6.64	-0.58	-0.38	0.2	1e-17	1e-17	1e-17	0.793529	0.469051	0.806042	2.25143e-17	2.43314e-17	2.35969e-17	0.985495
FALSE	High	Master Protein	Q9NZ32	Actin-related protein 10 [OS=Homo sapiens]	0	8.167	14	3	11	3	417	46.3	7.37	2.79	3	conjugation;metabolic process	cell surface;cytosol;endoplasmic reticulum;mitochondrion;nucleus		Pf00022	55860	ENSG00000131966	ACTR10	hsa:55860; Q9H9Y5; Q9NWY2; Q9NZ32	MHC class II antigen presentation; HSP90 chaperone cycle for steroid hormone receptors (SHR) in the presence of ligand; COPI-mediated anterograde transport; COPI-independent Golgi-to-ER retrograde traffic; Neutrophil degranulation		5	0	100	100	100	0.549	0.948	1.725	6.64	6.64	6.64	-0.86	-0.08	0.79	1e-17	1e-17	1e-17	0.663084	0.972377	0.573879	2.25143e-17	2.43314e-17	2.35969e-17	0.966783
FALSE	High	Master Protein	Q9HA64	Ketosamine-3-kinase [OS=Homo sapiens]	0	5.668	7	2	14	1	309	34.4	7.33	16.43	2	cell organization and biogenesis;cellular homeostasis	cytosol	signal transducer activity;structural molecule activity	Pf03881	79672	ENSG00000141560	FN3KRP	hsa:79672; Q969F4; Q9H0U7; Q9HA64	Gamma carboxylation, hypusine formation and arylsulfatase activation		1	0	100	100	100	1.003	1.467	1.462	6.64	6.64	6.64	0	0.55	0.55	1e-17	1e-17	1e-17	0.514689	0.206959	0.748131	2.25143e-17	2.43314e-17	2.35969e-17	0.919422
FALSE	High	Master Protein	P02452	Collagen alpha-1(I) chain [OS=Homo sapiens]	0	15.779	3	4	10	4	1464	138.9	5.8	20.42	4	cell growth;cellular homeostasis;coagulation;conjugation;defense response;development;metabolic process	cell surface;chromosome;extracellular;nucleus	enzyme regulator activity;structural molecule activity	Pf00093, Pf01391, Pf01410	1277	ENSG00000108821	COL1A1	hsa:1277; O76045; P02452; P78441; Q13896; Q13902; Q13903; Q14037; Q14992; Q15176; Q15201; Q16050; Q59F64; Q7KZ30; Q7KZ34; Q8IVI5; Q8N473; Q9UML6; Q9UMM7	GPVI-mediated activation cascade; Immunoregulatory interactions between a Lymphoid and a non-Lymphoid cell; Cell surface interactions at the vascular wall; Collagen degradation; Integrin cell surface interactions; ECM proteoglycans; Collagen chain trimerization; Syndecan interactions; MET activates PTK2 signaling; RUNX2 regulates osteoblast differentiation; Anchoring fibril formation; Crosslinkin…	Focal adhesion; Osteoblast signaling; Focal adhesion: PI3K-Akt-mTOR-signaling pathway; miR-509-3p alteration of YAP1/ECM axis; PI3K-Akt signaling pathway; Inflammatory response pathway; Netrin-UNC5B signaling pathway; IL-18 signaling pathway; Type I collagen synthesis in the context of osteogenesis imperfecta; Angiotensin II receptor type 1 pathway; Burn wound healing; CCL18 signaling pathway; NR…	33	0	0.01	0.05	0.01	100		0.01	-6.64	-4.33	-6.64	6.64		-6.64	1e-17	6.79708e-09	1e-17	1e-17		1e-17	2.25143e-17	1.62547e-08	2.35969e-17	1.33839e-16
FALSE	Medium	Master Protein	O75563	Src kinase-associated phosphoprotein 2 [OS=Homo sapiens]	0.042	1.691	3	1	1	1	359	41.2	4.69	2.33	1	cell growth;development;metabolic process	cytoplasm;cytoskeleton;cytosol;membrane;nucleus		Pf00018, Pf00169	8935	ENSG00000005020	SKAP2	A4D173; hsa:8935; O75563; Q53GP6; Q75MK6; Q75MZ4; Q9UBZ3; Q9UED8	Signal regulatory protein family interactions		1	0	100	100	100	0.342	0.597	1.748	6.64	6.64	6.64	-1.55	-0.74	0.81	1e-17	1e-17	1e-17	0.197037	0.185289	0.583448	2.25143e-17	2.43314e-17	2.35969e-17	0.653801
FALSE	High	Master Protein	Q99595	Mitochondrial import inner membrane translocase subunit Tim17-A [OS=Homo sapiens]	0.008	2.599	13	1	1	1	171	18	7.87	2.05	1	cell growth;conjugation;metabolic process	cytoskeleton;endosome;membrane	catalytic activity	Pf02466	10440	ENSG00000134375	TIMM17A	B2RDM5; hsa:10440; Q99595; Q9BWF5	Mitochondrial protein import		1	0	100		100	0.01	1.338	100	6.64		6.64	-6.64	0.42	6.64	1e-17		1e-17	1e-17	0.336727	1e-17	2.25143e-17		2.35969e-17	1.33839e-16
FALSE	High	Master Protein	Q8N668	COMM domain-containing protein 1 [OS=Homo sapiens]	0.001	4.155	11	1	2	1	190	21.2	6.2	2.1	1	cell proliferation;cellular homeostasis;coagulation;conjugation;metabolic process	cytoskeleton;cytosol;membrane;mitochondrion;nucleus	structural molecule activity	Pf07258, Pf17221	150684	ENSG00000173163	COMMD1	B4DFQ4; hsa:150684; Q8N668; Q96GS0	Neddylation	Copper homeostasis	2	0	100	100	100	0.72	1.271	1.765	6.64	6.64	6.64	-0.47	0.35	0.82	1e-17	1e-17	1e-17	0.964351	0.417991	0.561969	2.25143e-17	2.43314e-17	2.35969e-17	0.997943
FALSE	High	Master Protein	Q9NVD7	Alpha-parvin [OS=Homo sapiens]	0.001	4.628	9	2	9	2	372	42.2	5.95	4.64	2	cell communication;cell growth;defense response;metabolic process	cytoplasm;cytoskeleton;cytosol;endoplasmic reticulum;membrane;nucleus	DNA binding;motor activity	Pf00307	55742	ENSG00000197702	PARVA	hsa:55742; Q96C85; Q9HA48; Q9NVD7	Localization of the PINCH-ILK-PARVIN complex to focal adhesions; Regulation of cytoskeletal remodeling and cell spreading by IPP complex components	Primary focal segmental glomerulosclerosis (FSGS); Focal adhesion	5	0	100	100	100	1.247	1.16	0.93	6.64	6.64	6.64	0.32	0.21	-0.1	1e-17	1e-17	1e-17	0.306997	0.574156	0.437399	2.25143e-17	2.43314e-17	2.35969e-17	0.783345
FALSE	High	Master Protein	Q9H8T0	AKT-interacting protein [OS=Homo sapiens]	0.009	2.519	8	1	3	1	292	33.1	9.31	0	1	cell growth;cell organization and biogenesis;cellular homeostasis;conjugation;metabolic process	cytoplasm;cytoskeleton;cytosol;membrane;nucleus	structural molecule activity	Pf00179	64400	ENSG00000166971	AKTIP	hsa:64400; Q503B1; Q53H38; Q9H8T0			0	0	100	100	100	0.619	0.441	0.713	6.64	6.64	6.64	-0.69	-1.18	-0.49	1e-17	1e-17	1e-17	0.843198	0.0288727	0.181947	2.25143e-17	2.43314e-17	2.35969e-17	0.985798
FALSE	High	Master Protein	Q6PI48	Aspartate--tRNA ligase, mitochondrial [OS=Homo sapiens]	0	7.912	5	2	12	2	645	73.5	8.02	17.73	2	cell organization and biogenesis;cellular component movement;cellular homeostasis	endosome;membrane	RNA binding;structural molecule activity	Pf00152, Pf01336, Pf02938	55157	ENSG00000117593	DARS2	hsa:55157; Q6PI48	Mitochondrial tRNA aminoacylation		1	0	100	100	100	0.57	0.593	1.04	6.64	6.64	6.64	-0.81	-0.75	0.06	1e-17	1e-17	1e-17	0.518346	0.145729	0.668571	2.25143e-17	2.43314e-17	2.35969e-17	0.919947
FALSE	High	Master Protein	O14737	Programmed cell death protein 5 [OS=Homo sapiens]	0	9.368	19	2	7	2	125	14.3	6.04	24.61	2	metabolic process	cytosol;membrane	DNA binding;motor activity;RNA binding;structural molecule activity	Pf01984	9141	ENSG00000105185	PDCD5	B4DE64; hsa:9141; O14737; Q53YC9; Q6IB70			0	0	100	100	100	9.975	1.551	0.155	6.64	6.64	6.64	3.32	0.63	-2.69	1e-17	1e-17	1e-17	1.50122e-07	0.158538	7.79042e-08	2.25143e-17	2.43314e-17	2.35969e-17	1.73523e-06
FALSE	High	Master Protein	O43324	Eukaryotic translation elongation factor 1 epsilon-1 [OS=Homo sapiens]	0	23.713	40	6	30	6	174	19.8	8.54	63.62	6	cell organization and biogenesis;cellular homeostasis;metabolic process	cytosol;membrane;nucleus		Pf00043	9521	ENSG00000124802	EEF1E1	C9JLK5; hsa:9521; O43324; Q5THS2	Selenoamino acid metabolism; Cytosolic tRNA aminoacylation		2	0	100	100	100	0.829	1.26	1.52	6.64	6.64	6.64	-0.27	0.33	0.6	1e-17	1e-17	1e-17	0.840204	0.265362	0.316087	2.25143e-17	2.43314e-17	2.35969e-17	0.985798
FALSE	High	Master Protein	Q6DKI1	60S ribosomal protein L7-like 1 [OS=Homo sapiens]	0.002	3.413	7	1	1	1	255	29.7	10.52	0	1	cellular component movement;cellular homeostasis;defense response	cytosol;Golgi;membrane	structural molecule activity	Pf00327, Pf08079	285855	ENSG00000146223	RPL7L1	A8K7D4; B7Z652; hsa:285855; Q5TFZ5; Q6DKI1; Q6PEK3			0	0	100		100	0.01	1.571	100	6.64		6.64	-6.64	0.65	6.64	1e-17		1e-17	1e-17	0.168312	1e-17	2.25143e-17		2.35969e-17	1.33839e-16
FALSE	High	Master Protein	Q92917	G-patch domain and KOW motifs-containing protein [OS=Homo sapiens]	0	9.557	13	3	7	3	476	52.2	6.15	13.26	3	cellular component movement;cellular homeostasis	membrane	RNA binding	Pf00467, Pf12656	27238	ENSG00000068394	GPKOW	hsa:27238; Q59EK5; Q92917; Q9BQA8	mRNA Splicing - Major Pathway		1	0	100	100	100	0.863	1.083	1.256	6.64	6.64	6.64	-0.21	0.12	0.33	1e-17	1e-17	1e-17	0.790502	0.714515	0.955481	2.25143e-17	2.43314e-17	2.35969e-17	0.984968
FALSE	High	Master Protein	P17612	cAMP-dependent protein kinase catalytic subunit alpha [OS=Homo sapiens]	0	7.739	13	2	11	2	351	40.6	8.79	19.39	2	cell growth;cell organization and biogenesis;cellular component movement;cellular homeostasis;coagulation;defense response;development;metabolic process	cytoplasm;cytoskeleton;cytosol;endoplasmic reticulum;endosome;membrane;nucleus	signal transducer activity;structural molecule activity	Pf00069	5566	ENSG00000072062; ENSG00000288516	PRKACA	hsa:5566; P17612; Q32P54; Q9H2Y0; Q9NRB4; Q9NRH9	Degradation of GLI1 by the proteasome; Degradation of GLI2 by the proteasome; GLI3 is processed to GLI3R by the proteasome; MAPK6/MAPK4 signaling; Ion homeostasis; CD209 (DC-SIGN) signaling; HDL assembly; GPER1 signaling; VEGFA-VEGFR2 Pathway; Recruitment of NuMA to mitotic centrosomes; Regulation of PLK1 Activity at G2/M Transition; Loss of Nlp from mitotic centrosomes; Recruitment of mitotic ce…	Nicotine effect on dopaminergic neurons; Sterol regulatory element-binding proteins (SREBP) signaling; Follicle stimulating hormone (FSH) signaling pathway; Microtubule cytoskeleton regulation; Dopamine metabolism; Common pathways underlying drug addiction; Complement system; Mesodermal commitment pathway; IL-3 signaling pathway; Myometrial relaxation and contraction pathways; Mesodermal commitme…	67	0	100	100	100	0.673	0.792	1.175	6.64	6.64	6.64	-0.57	-0.34	0.23	1e-17	1e-17	1e-17	0.873034	0.566234	0.903351	2.25143e-17	2.43314e-17	2.35969e-17	0.986561
FALSE	High	Master Protein	Q9Y3I1	F-box only protein 7 [OS=Homo sapiens]	0.001	4.887	4	1	8	1	522	58.5	6.55	4.98	1	cell growth;cell organization and biogenesis;cellular homeostasis;conjugation;metabolic process	cytosol;endosome;membrane;nucleus	structural molecule activity	Pf11566	25793	ENSG00000100225	FBXO7	B4DNB3; B4DWX5; hsa:25793; Q5TGC4; Q5TI86; Q96HM6; Q9UF21; Q9UKT2; Q9Y3I1	Antigen processing: Ubiquitination & Proteasome degradation; Neddylation		2	0	100	100	100	0.893	1.036	1.16	6.64	6.64	6.64	-0.16	0.05	0.21	1e-17	1e-17	1e-17	0.672031	0.807268	0.769451	2.25143e-17	2.43314e-17	2.35969e-17	0.969048
FALSE	High	Master Protein	P80365	Corticosteroid 11-beta-dehydrogenase isozyme 2 [OS=Homo sapiens]	0.006	2.839	6	1	2	1	405	44.1	9.28	0	1	cellular homeostasis;coagulation;metabolic process	cytoskeleton;extracellular;membrane;nucleus	structural molecule activity	Pf00106	3291	ENSG00000176387	HSD11B2	A7LB28; C5HTY7; hsa:3291; P80365; Q13194; Q6P2G9; Q8N439; Q96QN8; Q9UC50; Q9UC51; Q9UCW5; Q9UCW6; Q9UCW7; Q9UCW8	Glucocorticoid biosynthesis	Classical pathway of steroidogenesis with glucocorticoid and mineralocorticoid metabolism; Prostaglandin synthesis and regulation	3	0	100		100	0.01	5.43	100	6.64		6.64	-6.64	2.44	6.64	1e-17		1e-17	1e-17	5.74469e-08	1e-17	2.25143e-17		2.35969e-17	1.33839e-16
FALSE	High	Master Protein	P49458	Signal recognition particle 9 kDa protein [OS=Homo sapiens]	0	9.079	22	2	4	2	86	10.1	7.97	10.1	2	conjugation;metabolic process	cytoskeleton;cytosol;extracellular;Golgi	RNA binding;structural molecule activity	Pf05486	6726	ENSG00000143742	SRP9	A8K0N0; hsa:6726; P49458; Q6NVX0; Q8WTW0	SRP-dependent cotranslational protein targeting to membrane		1	0	100	100	100	1.468	0.206	0.141	6.64	6.64	6.64	0.55	-2.28	-2.83	1e-17	1e-17	1e-17	0.147715	1.17074e-07	6.6816e-09	2.25143e-17	2.43314e-17	2.35969e-17	0.566109
FALSE	High	Master Protein	Q96BN8	Ubiquitin thioesterase otulin [OS=Homo sapiens]	0	8.087	14	3	5	3	352	40.2	5.47	11.99	3	cell death;cell organization and biogenesis;cellular homeostasis;coagulation;defense response;development;metabolic process	cytosol;nucleus	structural molecule activity	Pf16218	90268	ENSG00000154124	OTULIN	D3DTD3; hsa:90268; Q8NAS0; Q96BN8; Q96IA3	Synthesis of active ubiquitin: roles of E1 and E2 enzymes; Regulation of TNFR1 signaling		2	0	100	100	100	0.866	1.235	1.426	6.64	6.64	6.64	-0.21	0.3	0.51	1e-17	1e-17	1e-17	0.832177	0.408372	0.606916	2.25143e-17	2.43314e-17	2.35969e-17	0.985798
FALSE	High	Master Protein	P45954	Short/branched chain specific acyl-CoA dehydrogenase, mitochondrial [OS=Homo sapiens]	0	5.665	5	1	4	1	432	47.5	6.99	5.54	1	cellular homeostasis	endosome	structural molecule activity	Pf00441, Pf02770, Pf02771	36	ENSG00000196177	ACADSB	B4DQ51; hsa:36; P45954; Q5SQN6; Q96CX7	Branched-chain amino acid catabolism	Valproic acid pathway	2	0	100	100	100	0.708	0.522	0.737	6.64	6.64	6.64	-0.5	-0.94	-0.44	1e-17	1e-17	1e-17	0.982	0.0472169	0.201974	2.25143e-17	2.43314e-17	2.35969e-17	0.997943
FALSE	High	Master Protein	P50226	Sulfotransferase 1A2 [OS=Homo sapiens]	0	33.289	31	5	36	3	295	34.3	7.97	106.26	5	cellular homeostasis	cytosol;nucleus	structural molecule activity	Pf00685	6799	ENSG00000197165	SULT1A2	A9QY25; hsa:6799; P50226; P78393; Q14CJ7	Cytosolic sulfonation of small molecules	Sulfation biotransformation reaction; Arylamine metabolism; Metapathway biotransformation Phase I and II	4	2	100	100	100	0.965	1.017	1.054	6.64	6.64	6.64	-0.05	0.02	0.08	1e-17	1e-17	1e-17	0.784471	0.825338	0.839394	2.25143e-17	2.43314e-17	2.35969e-17	0.983539
FALSE	High	Master Protein	Q9Y6Y8	SEC23-interacting protein [OS=Homo sapiens]	0	5.911	4	2	7	2	1000	111	5.54	10.14	2	cell growth;conjugation	cytoskeleton;cytosol;extracellular;nucleus	structural molecule activity	Pf00536, Pf02862	11196	ENSG00000107651	SEC23IP	D3DRD2; hsa:11196; Q8IXH5; Q9BUK5; Q9Y6Y8	COPII-mediated vesicle transport		1	0	100	100	100	0.782	0.89	1.137	6.64	6.64	6.64	-0.35	-0.17	0.19	1e-17	1e-17	1e-17	0.94495	0.808893	0.850424	2.25143e-17	2.43314e-17	2.35969e-17	0.996089
FALSE	High	Master Protein	Q8IWA4	Mitofusin-1 [OS=Homo sapiens]	0	9.444	3	2	9	2	741	84.1	6.33	18.37	2	cell growth;cellular homeostasis;metabolic process	cytoskeleton;endosome	structural molecule activity	Pf00350, Pf04799	55669	ENSG00000171109	MFN1	A0A0C4DFN1; B2RAR1; D3DNR6; hsa:55669; O15323; O60639; Q8IWA4; Q9BZB5; Q9NWQ2	Factors involved in megakaryocyte development and platelet production; PINK1-PRKN Mediated Mitophagy; RHOT2 GTPase cycle		3	0	100	100	100	0.878	0.926	1.055	6.64	6.64	6.64	-0.19	-0.11	0.08	1e-17	1e-17	1e-17	0.777418	0.831493	0.629737	2.25143e-17	2.43314e-17	2.35969e-17	0.983529
FALSE	High	Master Protein	Q9Y5K5	Ubiquitin carboxyl-terminal hydrolase isozyme L5 [OS=Homo sapiens]	0	32.542	41	9	30	9	329	37.6	5.33	58.52	9	cell organization and biogenesis;cell proliferation;cellular homeostasis;coagulation;defense response;metabolic process	cytosol;membrane;nucleus	DNA binding;structural molecule activity	Pf01088, Pf18031	51377	ENSG00000116750	UCHL5	hsa:51377; Q5LJA6; Q5LJA7; Q8TBS4; Q96BJ9; Q9H1W5; Q9P0I3; Q9UQN2; Q9Y5K5	UCH proteinases; Downregulation of TGF-beta receptor signaling	TGF-beta signaling pathway	3	0	100	100	100	0.895	0.967	1.08	6.64	6.64	6.64	-0.16	-0.05	0.11	1e-17	1e-17	1e-17	0.981374	0.969748	0.95823	2.25143e-17	2.43314e-17	2.35969e-17	0.997943
FALSE	High	Master Protein	Q9H3P2	Negative elongation factor A [OS=Homo sapiens]	0	28.432	34	8	26	8	528	57.2	9.03	69.78	8	defense response;metabolic process	cytosol;membrane	structural molecule activity		7469	ENSG00000185049	NELFA	A2A2T1; hsa:7469; O95392; Q9H3P2	Formation of RNA Pol II elongation complex ; Formation of HIV elongation complex in the absence of HIV Tat; Formation of HIV-1 elongation complex containing HIV-1 Tat; Pausing and recovery of Tat-mediated HIV elongation; Tat-mediated HIV elongation arrest and recovery; HIV elongation arrest and recovery; Pausing and recovery of HIV elongation; RNA Polymerase II Pre-transcription Events; TP53 Regu…	Initiation of transcription and translation elongation at the HIV-1 LTR	15	0	100	100	100	0.753	1.383	1.836	6.64	6.64	6.64	-0.41	0.47	0.88	1e-17	1e-17	1e-17	0.872281	0.198787	0.227901	2.25143e-17	2.43314e-17	2.35969e-17	0.986561
FALSE	Medium	Master Protein	Q96CN9	GRIP and coiled-coil domain-containing protein 1 [OS=Homo sapiens]	0.013	2.283	3	1	2	1	775	87.8	5.45	0	1		cytoskeleton;cytosol;extracellular	structural molecule activity	Pf01465	79571	ENSG00000179562	GCC1	hsa:79571; Q96CN9; Q9H6N7	Retrograde transport at the Trans-Golgi-Network	Nuclear receptors meta-pathway	2	0	100		100	0.01	1.329	100	6.64		6.64	-6.64	0.41	6.64	1e-17		1e-17	1e-17	0.319281	1e-17	2.25143e-17		2.35969e-17	1.33839e-16
FALSE	High	Master Protein	Q5VZK9	F-actin-uncapping protein LRRC16A [OS=Homo sapiens]	0.009	2.53	2	1	3	1	1371	151.5	7.85	2.35	1	cell growth;cellular homeostasis;conjugation;metabolic process	cytoplasm;cytoskeleton;cytosol;endoplasmic reticulum;membrane;mitochondrion;nucleus	structural molecule activity	Pf13516, Pf16000, Pf17888	55604	ENSG00000079691	CARMIL1	B8X1J0; hsa:55604; Q5VZK9; Q6ZUH5; Q6ZW07; Q9NXU7	Factors involved in megakaryocyte development and platelet production		1	0	100		100	0.01	0.885	100	6.64		6.64	-6.64	-0.18	6.64	1e-17		1e-17	1e-17	0.782909	1e-17	2.25143e-17		2.35969e-17	1.33839e-16
FALSE	High	Master Protein	Q15819	Ubiquitin-conjugating enzyme E2 variant 2 [OS=Homo sapiens]	0	28.445	39	5	33	1	145	16.4	8.09	99	5	cell organization and biogenesis;cell proliferation;cellular homeostasis;coagulation;metabolic process	membrane;nucleus		Pf00179	7336	ENSG00000169139	UBE2V2	hsa:7336; Q15819	Antigen processing: Ubiquitination & Proteasome degradation; E3 ubiquitin ligases ubiquitinate target proteins; Recruitment and ATM-mediated phosphorylation of repair and signaling proteins at DNA double strand breaks; Processing of DNA double-strand break ends; G2/M DNA damage checkpoint; Nonhomologous End-Joining (NHEJ); Formation of Incision Complex in GG-NER		7	0	100	100	100	1.089	1.276	1.172	6.64	6.64	6.64	0.12	0.35	0.23	1e-17	1e-17	1e-17	0.479558	0.36436	0.996709	2.25143e-17	2.43314e-17	2.35969e-17	0.900174
FALSE	Medium	Master Protein	P82909	28S ribosomal protein S36, mitochondrial [OS=Homo sapiens]	0.013	2.32	16	1	3	1	103	11.5	9.99	2.24	1	cell organization and biogenesis;cellular homeostasis	cytoskeleton;endosome;Golgi	structural molecule activity		92259	ENSG00000134056; ENSG00000278461	MRPS36	hsa:92259; P82909; Q9H2H4	Mitochondrial translation elongation; Mitochondrial translation initiation; Mitochondrial translation termination		3	0	100	100	100	0.585	1.069	1.828	6.64	6.64	6.64	-0.77	0.1	0.87	1e-17	1e-17	1e-17	0.613851	0.765757	0.406517	2.25143e-17	2.43314e-17	2.35969e-17	0.952847
FALSE	High	Master Protein	Q9UPT5	Exocyst complex component 7 [OS=Homo sapiens]	0	8.3	4	2	11	2	735	83.3	6.79	10.94	2	conjugation;metabolic process	cytoplasm;cytoskeleton;cytosol;endoplasmic reticulum;nucleus		Pf03081	23265	ENSG00000182473	EXOC7	B5MC69; B8XXP2; hsa:23265; Q8ND93; Q8WV91; Q96FF0; Q9H8C3; Q9H9X3; Q9HA32; Q9UPT5	Translocation of SLC2A4 (GLUT4) to the plasma membrane; VxPx cargo-targeting to cilium; Insulin processing	Angiopoietin-like protein 8 regulatory pathway; Ciliary landscape	5	0	100	100	100	0.217	0.895	4.124	6.64	6.64	6.64	-2.2	-0.16	2.04	1e-17	1e-17	1e-17	0.00722403	0.809514	0.00596728	2.25143e-17	2.43314e-17	2.35969e-17	0.0566778
FALSE	High	Master Protein	Q9NVX2	Notchless protein homolog 1 [OS=Homo sapiens]	0	7.402	10	3	8	3	485	53.3	7.34	9.09	3	cell growth;defense response;development;metabolic process	membrane		Pf00400, Pf08154	54475	ENSG00000073536	NLE1	hsa:54475; O60868; Q59GJ8; Q9BU54; Q9NVX2			0	0	100	100	100	0.331	0.977	2.952	6.64	6.64	6.64	-1.59	-0.03	1.56	1e-17	1e-17	1e-17	0.0847426	0.971508	0.0234933	2.25143e-17	2.43314e-17	2.35969e-17	0.398632
FALSE	High	Master Protein	Q96JB2	Conserved oligomeric Golgi complex subunit 3 [OS=Homo sapiens]	0	15.617	8	5	17	5	828	94	5.57	16.33	5	cell growth;cell organization and biogenesis;cellular homeostasis;conjugation;metabolic process	cytoplasm;cytoskeleton;cytosol;extracellular		Pf04136	83548	ENSG00000136152	COG3	B2RAW5; hsa:83548; Q5VT70; Q8IXX4; Q96JB2; Q9BZ92	COPI-mediated anterograde transport; Retrograde transport at the Trans-Golgi-Network; Intra-Golgi traffic		3	0	100	100	100	0.687	0.781	1.138	6.64	6.64	6.64	-0.54	-0.36	0.19	1e-17	1e-17	1e-17	0.816639	0.476496	0.809712	2.25143e-17	2.43314e-17	2.35969e-17	0.985798
FALSE	Medium	Master Protein	Q9H2J4	Phosducin-like protein 3 [OS=Homo sapiens]	0.025	1.908	7	1	3	1	239	27.6	4.84	0	1	cell growth;coagulation;defense response;metabolic process	cytosol;extracellular;membrane;nucleus	antioxidant activity;structural molecule activity	Pf02114	79031	ENSG00000115539	PDCL3	B2RA00; hsa:79031; Q53S68; Q9H2J4			0	0	100	100	100	0.891	1.156	1.298	6.64	6.64	6.64	-0.17	0.21	0.38	1e-17	1e-17	1e-17	0.666482	0.571559	0.944228	2.25143e-17	2.43314e-17	2.35969e-17	0.968724
FALSE	High	Master Protein	Q9NXJ5	Pyroglutamyl-peptidase 1 [OS=Homo sapiens]	0.001	3.86	8	1	4	1	209	23.1	5.9	2.26	1	cell organization and biogenesis	cytosol	structural molecule activity	Pf01470	54858	ENSG00000130517	PGPEP1	A8K1Q3; hsa:54858; Q8IVT1; Q9NXJ5			0	0	100	100	100	1.109	1.538	1.386	6.64	6.64	6.64	0.15	0.62	0.47	1e-17	1e-17	1e-17	0.415409	0.143981	0.944126	2.25143e-17	2.43314e-17	2.35969e-17	0.866538
FALSE	High	Master Protein	Q8N442	Translation factor GUF1, mitochondrial [OS=Homo sapiens]	0	5.764	5	2	4	2	669	74.3	8.59	2.37	2	cell organization and biogenesis;cellular homeostasis;metabolic process	cytoskeleton;endosome	protein binding;structural molecule activity	Pf00009, Pf00679, Pf03144, Pf06421	60558	ENSG00000151806	GUF1	hsa:60558; Q5XKM8; Q8N442; Q9H710; Q9H8U4			0	0	100	100	100	0.405	0.775	1.915	6.64	6.64	6.64	-1.31	-0.37	0.94	1e-17	1e-17	1e-17	0.34277	0.569051	0.437974	2.25143e-17	2.43314e-17	2.35969e-17	0.819478
FALSE	High	Master Protein	Q4V328	GRIP1-associated protein 1 [OS=Homo sapiens]	0.01	2.5	2	1	2	1	841	95.9	5.11	0	1	conjugation;metabolic process	cytoskeleton;cytosol;membrane;mitochondrion;nucleus	structural molecule activity		56850	ENSG00000068400	GRIPAP1	A6NL78; hsa:56850; Q3MJ75; Q4V327; Q4V328; Q4V330; Q5HYG1; Q6N046; Q96DH8; Q9NQ43; Q9ULQ3			0	0	100	100	100	0.419	1.016	2.428	6.64	6.64	6.64	-1.26	0.02	1.28	1e-17	1e-17	1e-17	0.365743	0.870009	0.186041	2.25143e-17	2.43314e-17	2.35969e-17	0.836458
FALSE	High	Master Protein	Q92600	CCR4-NOT transcription complex subunit 9 [OS=Homo sapiens]	0	6.458	8	2	6	2	299	33.6	8.03	12.2	2	cellular component movement;cellular homeostasis;development;metabolic process	cytosol;membrane;nucleus	antioxidant activity;structural molecule activity	Pf04078	9125	ENSG00000144580	CNOT9	B2RPI0; B5MDQ4; B7Z1E5; hsa:9125; Q92600; Q96IX4	TP53 regulates transcription of additional cell cycle genes whose exact role in the p53 pathway remain uncertain; Activation of anterior HOX genes in hindbrain development during early embryogenesis; Deadenylation of mRNA		3	0	100	100	100	0.463	1.264	2.731	6.64	6.64	6.64	-1.11	0.34	1.45	1e-17	1e-17	1e-17	0.413214	0.438224	0.0965609	2.25143e-17	2.43314e-17	2.35969e-17	0.866538
FALSE	Medium	Master Protein	Q96S99	Pleckstrin homology domain-containing family F member 1 [OS=Homo sapiens]	0.018	2.136	8	1	3	1	279	31.2	8.24	4.33	1	cell growth;metabolic process	cytoskeleton;membrane;mitochondrion;nucleus	structural molecule activity	Pf00169, Pf01363	79156	ENSG00000166289	PLEKHF1	hsa:79156; Q96K11; Q96S99; Q9BUB9			0	0	100	100	100	0.364	1.129	3.098	6.64	6.64	6.64	-1.46	0.17	1.63	1e-17	1e-17	1e-17	0.211821	0.648465	0.0577051	2.25143e-17	2.43314e-17	2.35969e-17	0.664999
FALSE	High	Master Protein	Q6BCY4	NADH-cytochrome b5 reductase 2 [OS=Homo sapiens]	0	21.593	30	7	19	7	276	31.4	8.5	43.78	7	cellular homeostasis;conjugation	cytoskeleton;extracellular	structural molecule activity	Pf00175, Pf00970	51700	ENSG00000166394	CYB5R2	hsa:51700; Q6BCY4; Q9BVA3; Q9UF68; Q9UHJ0	Erythrocytes take up carbon dioxide and release oxygen	Oxidation by cytochrome P450	2	0	100	100	100	2.382	1.616	0.678	6.64	6.64	6.64	1.25	0.69	-0.56	1e-17	1e-17	1e-17	0.00445185	0.0552458	0.190341	2.25143e-17	2.43314e-17	2.35969e-17	0.0367277
FALSE	High	Master Protein	Q92797	Symplekin [OS=Homo sapiens]	0	45.599	16	11	59	11	1274	141.1	6.13	109.74	11	cell communication;cellular component movement;cellular homeostasis;metabolic process	cytoplasm;cytoskeleton;cytosol;endoplasmic reticulum;membrane;nucleus		Pf11935, Pf12295	8189	ENSG00000125755	SYMPK	hsa:8189; O00521; O00689; O00733; Q59GT5; Q8N2U5; Q92797	mRNA Splicing - Major Pathway; mRNA 3'-end processing; RNA Polymerase II Transcription Termination; Transport of Mature mRNA Derived from an Intronless Transcript; Processing of Intronless Pre-mRNAs		5	0	100	100	100	0.733	0.772	1.053	6.64	6.64	6.64	-0.45	-0.37	0.07	1e-17	1e-17	1e-17	0.671079	0.411799	0.881078	2.25143e-17	2.43314e-17	2.35969e-17	0.969048
FALSE	High	Master Protein	Q9BTX1	Nucleoporin NDC1 [OS=Homo sapiens]	0.001	4.337	3	1	5	1	674	76.3	9.09	6.61	1	cell differentiation;cell growth;conjugation;metabolic process	cytoplasm;cytoskeleton;endoplasmic reticulum;membrane;nucleus	structural molecule activity	Pf09531	55706	ENSG00000058804	NDC1	B4DHA3; B4DQQ5; G3XA81; hsa:55706; Q8NB76; Q9BTX1; Q9H9T6; Q9NSG3; Q9NSG4; Q9NVZ7	snRNP Assembly; ISG15 antiviral mechanism; NS1 Mediated Effects on Host Pathways; Nuclear import of Rev protein; HCMV Late Events; HCMV Early Events; Transcriptional regulation by small RNAs; SUMOylation of DNA replication proteins; Viral Messenger RNA Synthesis; Transport of Mature mRNA derived from an Intron-Containing Transcript; Regulation of HSF1-mediated heat shock response; Transport of th…		28	0	100	100	100	1.035	1.168	1.128	6.64	6.64	6.64	0.05	0.22	0.17	1e-17	1e-17	1e-17	0.485181	0.552609	0.733304	2.25143e-17	2.43314e-17	2.35969e-17	0.901134
FALSE	High	Master Protein	Q16637	Survival motor neuron protein [OS=Homo sapiens]	0.001	4.424	6	1	4	1	294	31.8	6.55	0	1	cell growth;cellular component movement;cellular homeostasis;defense response	cytosol;endoplasmic reticulum;membrane;nucleus	RNA binding;structural molecule activity	Pf06003	6606; 6607	ENSG00000172062; ENSG00000205571; ENSG00000273772; ENSG00000275349; ENSG00000277773	SMN1; SMN2	A8K0V4; hsa:6606; hsa:6607; Q13119; Q16637; Q549U5; Q96J51	snRNP Assembly		1	0	100	100	100	0.772	0.941	1.219	6.64	6.64	6.64	-0.37	-0.09	0.29	1e-17	1e-17	1e-17	0.971333	0.91273	0.939778	2.25143e-17	2.43314e-17	2.35969e-17	0.997943
FALSE	Medium	Master Protein	Q9H501	ESF1 homolog [OS=Homo sapiens]	0.026	1.885	1	1	2	1	851	98.7	5.11	0	1	cellular component movement;cellular homeostasis	membrane		Pf08159	51575	ENSG00000089048	ESF1	hsa:51575; Q86X92; Q9H501; Q9H9Q5; Q9HA35; Q9NX93; Q9P1S6			0	0	100	100	100	0.576	1.494	2.595	6.64	6.64	6.64	-0.8	0.58	1.38	1e-17	1e-17	1e-17	0.739532	0.202735	0.172183	2.25143e-17	2.43314e-17	2.35969e-17	0.980195
FALSE	High	Master Protein	Q96BP3	Peptidylprolyl isomerase domain and WD repeat-containing protein 1 [OS=Homo sapiens]	0	8.315	6	2	11	2	646	73.5	7.15	14.39	2	cell organization and biogenesis;cellular component movement;cellular homeostasis	membrane	structural molecule activity	Pf00160, Pf00400	23398	ENSG00000113593	PPWD1	B4DWR9; hsa:23398; Q15002; Q7KZ89; Q96BP3	mRNA Splicing - Major Pathway		1	0	100	100	100	0.49	0.678	1.384	6.64	6.64	6.64	-1.03	-0.56	0.47	1e-17	1e-17	1e-17	0.433367	0.306489	0.894696	2.25143e-17	2.43314e-17	2.35969e-17	0.875676
FALSE	High	Master Protein	Q6PCB0	von Willebrand factor A domain-containing protein 1 [OS=Homo sapiens]	0	5.953	9	2	2	2	445	46.8	7.68	2.56	2	cell growth;coagulation	chromosome;extracellular	structural molecule activity	Pf00041, Pf00092	64856	ENSG00000179403	VWA1	A8K692; B3KUA1; E9PB53; hsa:64856; Q6PCB0; Q7L5D7; Q9H6J5	Regulation of Insulin-like Growth Factor (IGF) transport and uptake by Insulin-like Growth Factor Binding Proteins (IGFBPs); Post-translational protein phosphorylation		2	0	100	100	100	6.924	0.886	0.128	6.64	6.64	6.64	2.79	-0.17	-2.97	1e-17	1e-17	1e-17	3.80695e-05	0.793232	3.0105e-06	2.25143e-17	2.43314e-17	2.35969e-17	0.000403369
FALSE	High	Master Protein	Q9HBL8	NmrA-like family domain-containing protein 1 [OS=Homo sapiens]	0	6.57	15	2	8	2	299	33.3	7.52	10.31	2		cytosol;membrane;nucleus	structural molecule activity	Pf05368	57407	ENSG00000153406; ENSG00000274684	NMRAL1	hsa:57407; Q9HBL8	Urea cycle		1	0	100	100	100	0.324	1.445	4.457	6.64	6.64	6.64	-1.62	0.53	2.16	1e-17	1e-17	1e-17	0.172738	0.194849	0.0161447	2.25143e-17	2.43314e-17	2.35969e-17	0.613595
FALSE	High	Master Protein	P07902	Galactose-1-phosphate uridylyltransferase [OS=Homo sapiens]	0	9.626	14	2	11	2	379	43.3	6.99	25	2	cellular homeostasis	cytosol;extracellular;nucleus	structural molecule activity	Pf01087, Pf02744	2592	ENSG00000213930	GALT	B4E097; E7ET32; hsa:2592; P07902; Q14355; Q14356; Q14357; Q14358; Q14359; Q14360; Q14361; Q14363; Q14364; Q14365; Q14369; Q14370; Q14371; Q14372; Q14373; Q14374; Q14375; Q14377; Q14378; Q14380; Q14381; Q14382; Q14383; Q14384; Q14385; Q14386; Q14387; Q14389; Q16766; Q53XK1; Q5VZ81; Q96BY1	Defective GALT can cause GALCT; Galactose catabolism		2	0	100	100	100	0.702	1.134	1.615	6.64	6.64	6.64	-0.51	0.18	0.69	1e-17	1e-17	1e-17	0.836484	0.654748	0.552355	2.25143e-17	2.43314e-17	2.35969e-17	0.985798
FALSE	High	Master Protein	Q9BW92	Threonine--tRNA ligase, mitochondrial [OS=Homo sapiens]	0	14.664	9	4	9	4	718	81	7.3	18.11	4	cell organization and biogenesis;cellular component movement;cellular homeostasis	endosome	structural molecule activity	Pf00587, Pf02824, Pf03129, Pf07973	80222	ENSG00000143374	TARS2	hsa:80222; Q53GW7; Q96I50; Q9BW92; Q9H9V2	Mitochondrial tRNA aminoacylation		1	0	100	100	100	0.525	0.747	1.423	6.64	6.64	6.64	-0.93	-0.42	0.51	1e-17	1e-17	1e-17	0.405927	0.395171	0.742277	2.25143e-17	2.43314e-17	2.35969e-17	0.865139
FALSE	High	Master Protein	Q9Y3D0	Cytosolic iron-sulfur assembly component 2B [OS=Homo sapiens]	0.009	2.51	13	1	2	1	163	17.7	5.19	2.54	1	cell growth;cell organization and biogenesis;cellular homeostasis;metabolic process	cytosol;endoplasmic reticulum;membrane;nucleus		Pf01883	51647	ENSG00000166595	CIAO2B	hsa:51647; Q9Y3D0	Cytosolic iron-sulfur cluster assembly		1	0	100	100	100	1.665	2.131	1.28	6.64	6.64	6.64	0.74	1.09	0.36	1e-17	1e-17	1e-17	0.126276	0.0244122	0.997254	2.25143e-17	2.43314e-17	2.35969e-17	0.509703
FALSE	High	Master Protein	Q9NUW8	Tyrosyl-DNA phosphodiesterase 1 [OS=Homo sapiens]	0	10.003	7	3	9	3	608	68.4	7.65	7.31	3	cell proliferation;cellular homeostasis;coagulation	cytoplasm;cytoskeleton;membrane;nucleus	RNA binding;structural molecule activity	Pf06087	55775	ENSG00000042088	TDP1	hsa:55775; Q2HXX4; Q86TV8; Q96BK7; Q9NUW8; Q9NZM7; Q9NZM8	Nonhomologous End-Joining (NHEJ)		1	0	100	100	100	0.911	1.015	1.113	6.64	6.64	6.64	-0.13	0.02	0.15	1e-17	1e-17	1e-17	0.639275	0.823685	0.777857	2.25143e-17	2.43314e-17	2.35969e-17	0.962246
FALSE	High	Master Protein	Q96EP5	DAZ-associated protein 1 [OS=Homo sapiens]	0	55.396	29	9	51	9	407	43.4	8.56	148.51	9	cell differentiation;defense response;metabolic process	cytosol;membrane;nucleus	RNA binding	Pf00076	26528	ENSG00000071626	DAZAP1	hsa:26528; Q96EP5; Q96MJ3; Q9NRR9			0	0	100	86.979	90.078	0.631	0.653	1.036	6.64	6.44	6.49	-0.66	-0.61	0.05	1e-17	0.0724215	0.0525765	0.321808	0.0868046	0.871333	2.25143e-17	0.14143	0.102273	0.797234
FALSE	High	Master Protein	Q9BUT1	3-hydroxybutyrate dehydrogenase type 2 [OS=Homo sapiens]	0.002	3.612	9	1	5	1	245	26.7	7.65	3.25	1	cellular homeostasis;metabolic process	cytosol;nucleus	structural molecule activity	Pf13561	56898	ENSG00000164039	BDH2	A8K295; B4DUF6; hsa:56898; Q503A0; Q6IA46; Q6UWD3; Q9BUT1; Q9H8S8; Q9NRX8	Synthesis of Ketone Bodies		1	0	100	100	100	2.073	1.29	0.622	6.64	6.64	6.64	1.05	0.37	-0.68	1e-17	1e-17	1e-17	0.0544507	0.392585	0.0931206	2.25143e-17	2.43314e-17	2.35969e-17	0.295717
FALSE	High	Master Protein	Q9Y3D8	Adenylate kinase isoenzyme 6 [OS=Homo sapiens]	0.004	3.031	9	1	6	1	172	20	4.58	10.02	1	cellular homeostasis	cytosol;endoplasmic reticulum;membrane;nucleus	signal transducer activity;structural molecule activity	Pf13238	102157402	ENSG00000085231; ENSG00000279247	AK6	A8MSZ6; hsa:102157402; Q5F2S9; Q9Y3D8	Interconversion of nucleotide di- and triphosphates		1	0	100	100	100	0.743	1.375	1.852	6.64	6.64	6.64	-0.43	0.46	0.89	1e-17	1e-17	1e-17	0.908364	0.280728	0.472577	2.25143e-17	2.43314e-17	2.35969e-17	0.992849
FALSE	High	Master Protein	Q96MN2	NACHT, LRR and PYD domains-containing protein 4 [OS=Homo sapiens]	0.001	4.161	1	1	7	1	994	113.3	5.8	16.6	1	coagulation	cytosol	structural molecule activity	Pf02758, Pf05729, Pf13516, Pf17776, Pf17779	147945	ENSG00000160505	NLRP4	hsa:147945; Q86W87; Q96AY6; Q96MN2	Regulation of innate immune responses to cytosolic DNA; IRF3-mediated induction of type I IFN; IRF3 mediated activation of type 1 IFN	Nucleotide-binding oligomerization domain (NOD) pathway	4	0	100	100	100	0.879	1.457	1.657	6.64	6.64	6.64	-0.19	0.54	0.73	1e-17	1e-17	1e-17	0.688423	0.218638	0.621984	2.25143e-17	2.43314e-17	2.35969e-17	0.971932
FALSE	High	Master Protein	Q01970	1-phosphatidylinositol 4,5-bisphosphate phosphodiesterase beta-3 [OS=Homo sapiens]	0	19.907	9	5	22	5	1234	138.7	5.9	25.93	5	cellular homeostasis;development;metabolic process	cytoskeleton;cytosol;membrane;nucleus	structural molecule activity	Pf00168, Pf00387, Pf00388, Pf08703, Pf09279, Pf17787	5331	ENSG00000149782	PLCB3	A5PKZ6; G5E960; hsa:5331; Q01970; Q8N1A4	G alpha (q) signalling events; Synthesis of IP3 and IP4 in the cytosol; Ca2+ pathway; G beta:gamma signalling through PLC beta; Presynaptic function of Kainate receptors; Fatty Acids bound to GPR40 (FFAR1) regulate insulin secretion; PLC beta mediated events; Acetylcholine regulates insulin secretion	Alzheimer's disease and miRNA effects; S1P receptor signal transduction; Myometrial relaxation and contraction pathways; G protein signaling pathways; VEGFA-VEGFR2 signaling pathway; Chemokine signaling pathway; GPR40 pathway; MAPK cascade; Wnt signaling; Non-genomic actions of 1,25 dihydroxyvitamin D3; Resistin as a regulator of inflammation; Hippo signaling regulation pathways; PKC-gamma calciu…	26	0	100	100	100	0.704	0.521	0.739	6.64	6.64	6.64	-0.51	-0.94	-0.44	1e-17	1e-17	1e-17	0.888142	0.0843558	0.284819	2.25143e-17	2.43314e-17	2.35969e-17	0.990311
FALSE	High	Master Protein	Q9Y6W5	Wiskott-Aldrich syndrome protein family member 2 [OS=Homo sapiens]	0	12.667	9	3	16	3	498	54.3	5.53	19.33	3	cell growth;conjugation;defense response;development;metabolic process	cytoplasm;cytoskeleton;cytosol;endoplasmic reticulum;mitochondrion;nucleus	motor activity;structural molecule activity	Pf02205	10163	ENSG00000158195	WASF2	B4DZN0; hsa:10163; O60794; Q9UDY7; Q9Y6W5	Regulation of actin dynamics for phagocytic cup formation; FCGR3A-mediated phagocytosis; RAC1 GTPase cycle; RHO GTPases Activate WASPs and WAVEs; RAC2 GTPase cycle; RAC3 GTPase cycle; VEGFA-VEGFR2 Pathway	Regulation of actin cytoskeleton	8	0	100	100	100	1.257	0.946	0.752	6.64	6.64	6.64	0.33	-0.08	-0.41	1e-17	1e-17	1e-17	0.298247	0.90662	0.169959	2.25143e-17	2.43314e-17	2.35969e-17	0.773902
FALSE	Low	Master Protein	Q96FA3	E3 ubiquitin-protein ligase pellino homolog 1 [OS=Homo sapiens]	0.059	1.496	5	1	1	1	418	46.3	8.03	0	1	cell organization and biogenesis;cellular homeostasis;development;metabolic process	cytosol;membrane	structural molecule activity	Pf04710	57162	ENSG00000197329	PELI1	hsa:57162; Q96FA3; Q96SM0; Q9GZY5; Q9HCX0	Interleukin-1 signaling; IRAK1 recruits IKK complex; IRAK1 recruits IKK complex upon TLR7/8 or 9 stimulation; Regulation of necroptotic cell death	IL-1 signaling pathway	5	0	0.01	0.235	0.178	100	100	0.757	-6.64	-2.09	-2.49	6.64	6.64	-0.4	1e-17	0.00639762	0.00438285	1e-17	1e-17	0.20929	2.25143e-17	0.0138224	0.00925004	1.33839e-16
FALSE	High	Master Protein	Q9UKD2	mRNA turnover protein 4 homolog [OS=Homo sapiens]	0.007	2.727	10	1	1	1	239	27.5	8.29	0	1	cell growth;cellular component movement;cellular homeostasis;metabolic process	membrane;nucleus		Pf00466, Pf17777	51154	ENSG00000053372	MRTO4	B3KNB3; hsa:51154; Q5TG55; Q96SS6; Q9BPV9; Q9UKD2			0	0	100	100	100	0.66	0.952	1.442	6.64	6.64	6.64	-0.6	-0.07	0.53	1e-17	1e-17	1e-17	0.825645	0.938685	0.778875	2.25143e-17	2.43314e-17	2.35969e-17	0.985798
FALSE	High	Master Protein	Q9BYX2	TBC1 domain family member 2A [OS=Homo sapiens]	0.005	2.883	3	1	3	1	928	105.3	6.58	5.89	1	conjugation;metabolic process	cytoplasm;cytoskeleton;cytosol;membrane;nucleus	DNA binding;structural molecule activity	Pf00169, Pf00566	55357	ENSG00000095383	TBC1D2	B3KWD1; B4DQ05; B9A6J7; hsa:55357; Q59EU0; Q5TBQ5; Q6IPC7; Q7L1K8; Q8WYT1; Q9BYX2; Q9H6A2; Q9NSH4	TBC/RABGAPs		1	0	100	100	100	0.853	0.715	0.837	6.64	6.64	6.64	-0.23	-0.48	-0.26	1e-17	1e-17	1e-17	0.738725	0.349899	0.288746	2.25143e-17	2.43314e-17	2.35969e-17	0.980195
FALSE	High	Master Protein	Q96FK6	WD repeat-containing protein 89 [OS=Homo sapiens]	0.001	5.146	9	2	2	2	387	43.2	6.13	2.1	2				Pf00400	112840	ENSG00000140006	WDR89	hsa:112840; Q96FK6			0	0	100	100	100	0.485	1.292	2.664	6.64	6.64	6.64	-1.04	0.37	1.41	1e-17	1e-17	1e-17	0.391098	0.448583	0.0748074	2.25143e-17	2.43314e-17	2.35969e-17	0.855193
FALSE	High	Master Protein	Q9BXR0	Queuine tRNA-ribosyltransferase catalytic subunit 1 [OS=Homo sapiens]	0	9.837	15	3	13	3	403	44	7.23	27.37	3	cellular component movement;cellular homeostasis	cytoskeleton;endosome;membrane;nucleus	structural molecule activity	Pf01702	81890	ENSG00000213339	QTRT1	B4DFM7; hsa:81890; Q96BQ4; Q9BXQ9; Q9BXR0	tRNA modification in the nucleus and cytosol		1	0	100	100	100	0.722	0.95	1.316	6.64	6.64	6.64	-0.47	-0.07	0.4	1e-17	1e-17	1e-17	0.884179	0.89474	0.918187	2.25143e-17	2.43314e-17	2.35969e-17	0.98921
FALSE	High	Master Protein	Q9Y450	HBS1-like protein [OS=Homo sapiens]	0	7.63	6	3	3	3	684	75.4	6.61	6.85	3	cell organization and biogenesis;cellular homeostasis;development	cytosol	RNA binding;structural molecule activity	Pf00009, Pf03143, Pf03144, Pf08938	10767	ENSG00000112339	HBS1L	B7Z365; hsa:10767; Q4VX89; Q4VX90; Q5T7G3; Q8NDW9; Q9UPW3; Q9Y450	mRNA decay by 3' to 5' exoribonuclease		1	0	100	100	100	0.895	0.996	1.113	6.64	6.64	6.64	-0.16	-0.01	0.15	1e-17	1e-17	1e-17	0.737152	0.992049	0.710894	2.25143e-17	2.43314e-17	2.35969e-17	0.980195
FALSE	High	Master Protein	A1X283	SH3 and PX domain-containing protein 2B [OS=Homo sapiens]	0	10.577	7	2	6	2	911	101.5	8.69	12.52	2	cell growth;cellular homeostasis;defense response;metabolic process	endoplasmic reticulum;nucleus	DNA binding;structural molecule activity	Pf00018, Pf00787, Pf07653	285590	ENSG00000174705	SH3PXD2B	A1X283; B6F0V2; hsa:285590; Q9P2Q1			0	0	100	100	100	1.113	1.245	1.119	6.64	6.64	6.64	0.15	0.32	0.16	1e-17	1e-17	1e-17	0.408499	0.450431	0.757226	2.25143e-17	2.43314e-17	2.35969e-17	0.865139
FALSE	High	Master Protein	Q8N335	Glycerol-3-phosphate dehydrogenase 1-like protein [OS=Homo sapiens]	0.001	4.931	12	2	3	2	351	38.4	7.02	4.87	2	cellular homeostasis;metabolic process	cytoplasm;cytoskeleton;cytosol;nucleus	structural molecule activity	Pf01210, Pf07479	23171	ENSG00000152642	GPD1L	A8K9U3; hsa:23171; Q14702; Q8N335; Q9BRM5	Synthesis of PA	Sudden infant death syndrome (SIDS) susceptibility pathways	2	0	100	100	100	0.565	1.635	2.893	6.64	6.64	6.64	-0.82	0.71	1.53	1e-17	1e-17	1e-17	0.711316	0.124656	0.109379	2.25143e-17	2.43314e-17	2.35969e-17	0.9763
FALSE	High	Master Protein	Q9NVM6	DnaJ homolog subfamily C member 17 [OS=Homo sapiens]	0.002	3.432	7	1	7	1	304	34.7	8.53	6.43	1	conjugation;metabolic process	membrane;nucleus	RNA binding	Pf00076, Pf00226	55192	ENSG00000104129	DNAJC17	hsa:55192; Q9NVM6			0	0	100	100	100	0.456	1.096	2.403	6.64	6.64	6.64	-1.13	0.13	1.27	1e-17	1e-17	1e-17	0.42753	0.638632	0.226881	2.25143e-17	2.43314e-17	2.35969e-17	0.8729
FALSE	High	Master Protein	P78316	Nucleolar protein 14 [OS=Homo sapiens]	0.001	4.155	5	2	3	2	857	97.6	7.58	8.04	2	cellular component movement;cellular homeostasis;metabolic process	membrane;nucleus	RNA binding;structural molecule activity	Pf04147	8602	ENSG00000087269	NOP14	D3DVR6; hsa:8602; P78316; Q7LGI5; Q7Z6K0; Q8TBR6	Major pathway of rRNA processing in the nucleolus and cytosol; rRNA modification in the nucleus and cytosol		2	0	100	100	100	0.534	1.015	1.899	6.64	6.64	6.64	-0.9	0.02	0.92	1e-17	1e-17	1e-17	0.232593	0.860285	0.150201	2.25143e-17	2.43314e-17	2.35969e-17	0.696328
FALSE	High	Master Protein	Q8IVM0	Coiled-coil domain-containing protein 50 [OS=Homo sapiens]	0.008	2.573	4	1	2	1	306	35.8	6.65	4.39	1	metabolic process	cytosol	structural molecule activity	Pf15295	152137	ENSG00000152492	CCDC50	hsa:152137; Q86VH7; Q8IVM0			0	0	100	100	100	0.545	0.926	1.7	6.64	6.64	6.64	-0.88	-0.11	0.77	1e-17	1e-17	1e-17	0.63523	0.994947	0.592696	2.25143e-17	2.43314e-17	2.35969e-17	0.962246
FALSE	High	Master Protein	Q5SWX8	Protein odr-4 homolog [OS=Homo sapiens]	0	5.469	7	2	3	2	454	51.1	5.92	4.93	2	metabolic process	cytoskeleton		Pf14778	54953	ENSG00000157181	ODR4	B4DNY0; E9PFR7; hsa:54953; Q19CC6; Q5SWX8; Q8WYB6; Q9BTS2; Q9H6A6; Q9NX06			0	0	100	100	100	5.747	4.488	0.781	6.64	6.64	6.64	2.52	2.17	-0.36	1e-17	1e-17	1e-17	2.61018e-05	9.62983e-06	0.288653	2.25143e-17	2.43314e-17	2.35969e-17	0.000280692
FALSE	High	Master Protein	Q9UBV2	Protein sel-1 homolog 1 [OS=Homo sapiens]	0	5.267	5	2	2	2	794	88.7	5.39	1.83	2	cell organization and biogenesis;cellular homeostasis;coagulation;conjugation;development;metabolic process	cytoskeleton;extracellular		Pf00040, Pf08238	6400	ENSG00000071537	SEL1L	hsa:6400; Q6UWT6; Q9P1T9; Q9UBV2; Q9UHK7	ABC-family proteins mediated transport; Hedgehog ligand biogenesis; Hh mutants are degraded by ERAD; Defective CFTR causes cystic fibrosis; Pre-NOTCH Processing in Golgi; ER Quality Control Compartment (ERQC)	Familial hyperlipidemia type 1; Familial hyperlipidemia type 4; Familial hyperlipidemia type 5	9	0	100	100	100	0.742	0.853	1.149	6.64	6.64	6.64	-0.43	-0.23	0.2	1e-17	1e-17	1e-17	0.930728	0.664728	0.826025	2.25143e-17	2.43314e-17	2.35969e-17	0.992849
FALSE	High	Master Protein	Q9Y4B6	DDB1- and CUL4-associated factor 1 [OS=Homo sapiens]	0	6.665	3	3	5	3	1507	168.9	5.06	0	3	cell organization and biogenesis;cell proliferation;cellular homeostasis;defense response;metabolic process	membrane;nucleus	signal transducer activity;structural molecule activity		9730	ENSG00000145041	DCAF1	hsa:9730; Q2YD74; Q8TBD9; Q9HCA1; Q9UG37; Q9Y4B6	Antigen processing: Ubiquitination & Proteasome degradation	Hippo-Merlin signaling dysregulation	2	0	100	100	100	0.637	0.966	1.515	6.64	6.64	6.64	-0.65	-0.05	0.6	1e-17	1e-17	1e-17	0.867691	0.909004	0.741591	2.25143e-17	2.43314e-17	2.35969e-17	0.986561
FALSE	High	Master Protein	Q658Y4	Protein FAM91A1 [OS=Homo sapiens]	0.001	3.814	4	2	7	2	838	93.9	6.39	2.12	2	cell growth;conjugation	extracellular;nucleus		Pf14647, Pf14648	157769	ENSG00000176853	FAM91A1	B6YY23; hsa:157769; Q658T5; Q658Y4; Q8TE89	RHOH GTPase cycle	Gastric cancer network 2	2	0	100	100	100	0.644	1.069	1.66	6.64	6.64	6.64	-0.64	0.1	0.73	1e-17	1e-17	1e-17	0.891602	0.716742	0.644731	2.25143e-17	2.43314e-17	2.35969e-17	0.990311
FALSE	High	Master Protein	Q8NBZ7	UDP-glucuronic acid decarboxylase 1 [OS=Homo sapiens]	0	12.557	18	3	13	3	420	47.5	8.94	20.84	3	cellular homeostasis	cytoskeleton;extracellular;nucleus	structural molecule activity	Pf11803, Pf16363	80146	ENSG00000115652	UXS1	hsa:80146; Q8NBX3; Q8NBZ7; Q9H5C2			0	0	100	100	100	0.904	0.93	1.029	6.64	6.64	6.64	-0.15	-0.11	0.04	1e-17	1e-17	1e-17	0.730108	0.882156	0.615404	2.25143e-17	2.43314e-17	2.35969e-17	0.980195
FALSE	High	Master Protein	Q9NWW5	Ceroid-lipofuscinosis neuronal protein 6 [OS=Homo sapiens]	0	7.405	7	1	6	1	311	35.9	8.87	20.19	1	cell growth;cell organization and biogenesis;cellular homeostasis;metabolic process	cytoskeleton;extracellular;membrane;mitochondrion;nucleus	structural molecule activity	Pf15156	54982	ENSG00000128973	CLN6	A8K560; B4DDH6; hsa:54982; Q6IAB1; Q96SR0; Q9NWW5			0	0	100	100	100	0.956	0.755	0.79	6.64	6.64	6.64	-0.07	-0.4	-0.34	1e-17	1e-17	1e-17	0.749903	0.423272	0.301503	2.25143e-17	2.43314e-17	2.35969e-17	0.981654
FALSE	Medium	Master Protein	Q68CQ7	Glycosyltransferase 8 domain-containing protein 1 [OS=Homo sapiens]	0.013	2.325	3	1	6	1	371	41.9	9.35	5.08	1		cytoskeleton;extracellular	structural molecule activity	Pf01501	55830	ENSG00000016864	GLT8D1	hsa:55830; Q68CQ7; Q7Z4D1; Q8N2J6; Q9P0I5			0	0	100	100	100	1.369	1.443	1.054	6.64	6.64	6.64	0.45	0.53	0.08	1e-17	1e-17	1e-17	0.233421	0.222534	0.673432	2.25143e-17	2.43314e-17	2.35969e-17	0.697923
FALSE	High	Master Protein	P51884	Lumican [OS=Homo sapiens]	0	8.048	8	2	10	2	338	38.4	6.61	10.48	2	cell growth;defense response;metabolic process	chromosome;extracellular;mitochondrion	enzyme regulator activity;structural molecule activity	Pf01462, Pf13516, Pf13855	4060	ENSG00000139329	LUM	B2R6R5; hsa:4060; P51884; Q96QM7	Integrin cell surface interactions; ECM proteoglycans; Keratan sulfate degradation; Keratan sulfate biosynthesis; Defective CHST6 causes MCDC1; Defective ST3GAL3 causes MCT12 and EIEE15; Defective B4GALT1 causes B4GALT1-CDG (CDG-2d)		7	0	0.01	0.018	0.011	100	100	0.586	-6.64	-5.77	-6.54	6.64	6.64	-0.77	1e-17	2.05147e-11	6.79876e-11	1e-17	1e-17	0.05976	2.25143e-17	4.98282e-11	1.59206e-10	1.33839e-16
FALSE	High	Master Protein	Q14353	Guanidinoacetate N-methyltransferase [OS=Homo sapiens]	0	6.308	18	2	9	2	236	26.3	6.14	12.15	2	cellular homeostasis;defense response;metabolic process	cytosol;membrane;nucleus	structural molecule activity		2593	ENSG00000130005	GAMT	A8K0A0; hsa:2593; Q14353; Q53Y34; Q8WVJ1	Transcriptional Regulation by MECP2; Creatine metabolism	MECP2 and associated Rett syndrome	3	0	100	100	100	0.475	1.592	3.349	6.64	6.64	6.64	-1.07	0.67	1.74	1e-17	1e-17	1e-17	0.311354	0.115177	0.00935296	2.25143e-17	2.43314e-17	2.35969e-17	0.787584
FALSE	High	Master Protein	Q92990	Glomulin [OS=Homo sapiens]	0	23.428	13	5	28	5	594	68.2	5.33	45.96	5	cell growth;defense response;development;metabolic process	nucleus	antioxidant activity;DNA binding;structural molecule activity	Pf08568	11146	ENSG00000174842	GLMN	hsa:11146; Q5VVC3; Q92990; Q9BVE8	Antigen processing: Ubiquitination & Proteasome degradation		1	0	100	100	100	0.684	1.334	1.949	6.64	6.64	6.64	-0.55	0.42	0.96	1e-17	1e-17	1e-17	0.770961	0.270265	0.20384	2.25143e-17	2.43314e-17	2.35969e-17	0.983441
FALSE	High	Master Protein	P37235	Hippocalcin-like protein 1 [OS=Homo sapiens]	0	8.405	20	3	9	3	193	22.3	5.35	18.5	3		cytoskeleton	structural molecule activity	Pf13499, Pf13833	3241	ENSG00000115756	HPCAL1	hsa:3241; P37235; Q969S5			0	0	100	100	100	3.567	1.399	0.392	6.64	6.64	6.64	1.83	0.48	-1.35	1e-17	1e-17	1e-17	0.000744698	0.312893	0.00683011	2.25143e-17	2.43314e-17	2.35969e-17	0.00701379
FALSE	High	Master Protein	P13498	Cytochrome b-245 light chain [OS=Homo sapiens]	0.001	4.437	16	1	5	1	195	21	9.54	15.05	1	cell growth;cellular homeostasis;coagulation;metabolic process	cytoplasm;cytoskeleton;endoplasmic reticulum;extracellular;membrane;mitochondrion;nucleus	structural molecule activity	Pf05038	1535	ENSG00000051523	CYBA	hsa:1535; P13498; Q14090; Q9BR72	Neutrophil degranulation; RAC2 GTPase cycle; RAC3 GTPase cycle; RAC1 GTPase cycle; Detoxification of Reactive Oxygen Species; VEGFA-VEGFR2 Pathway; Cross-presentation of particulate exogenous antigens (phagosomes); WNT5:FZD7-mediated leishmania damping; ROS and RNS production in phagocytes; RHO GTPases Activate NADPH Oxidases	TNF-alpha signaling pathway; Microglia pathogen phagocytosis pathway	12	0	100		100	0.01	0.94	100	6.64		6.64	-6.64	-0.09	6.64	1e-17		1e-17	1e-17	0.896178	1e-17	2.25143e-17		2.35969e-17	1.33839e-16
FALSE	High	Master Protein	P01024	Complement C3 [OS=Homo sapiens]	0	70.061	10	15	78	15	1663	187	6.4	181.07	15	cell death;cell growth;cellular homeostasis;coagulation;defense response;development;metabolic process	cell surface;cytoplasm;cytoskeleton;extracellular;mitochondrion;nucleus	antioxidant activity;DNA binding	Pf00207, Pf01759, Pf01821, Pf01835, Pf07677, Pf07678, Pf07703, Pf17789, Pf17790, Pf17791	718	ENSG00000125730	C3	A7E236; hsa:718; P01024	Neutrophil degranulation; Regulation of Insulin-like Growth Factor (IGF) transport and uptake by Insulin-like Growth Factor Binding Proteins (IGFBPs); Post-translational protein phosphorylation; Immunoregulatory interactions between a Lymphoid and a non-Lymphoid cell; Regulation of Complement cascade; G alpha (i) signalling events; Peptide ligand-binding receptors; Purinergic signaling in leishma…	Allograft rejection; Complement system; TYROBP causal network in microglia; Cells and molecules involved in local acute inflammatory response ; 16p11.2 distal deletion syndrome; Complement system in neuronal development and plasticity; Acquired partial lipodystrophy / Barraquer-Simons syndrome; Complement activation; Complement and coagulation cascades	19	0	0.01	0.083	0.079	9.302	8.876	0.954	-6.64	-3.6	-3.66	3.22	3.15	-0.07	1e-17	8.4338e-08	9.39022e-10	3.39062e-13	1e-17	0.60917	2.25143e-17	1.98512e-07	2.17754e-09	4.4017e-12
FALSE	High	Master Protein	Q68D91	Metallo-beta-lactamase domain-containing protein 2 [OS=Homo sapiens]	0	5.358	8	1	2	1	279	31.4	6.92	6.46	1		cytoplasm;cytoskeleton;extracellular	structural molecule activity	Pf00753	153364	ENSG00000176055	MBLAC2	D6RJI1; hsa:153364; Q68D91; Q8IY16; Q8N8D8			0	0	100	100	100	1.506	0.959	0.637	6.64	6.64	6.64	0.59	-0.06	-0.65	1e-17	1e-17	1e-17	0.166459	0.989111	0.154435	2.25143e-17	2.43314e-17	2.35969e-17	0.603188
FALSE	High	Master Protein	Q9Y240	C-type lectin domain family 11 member A [OS=Homo sapiens]	0	6.242	6	2	2	2	323	35.7	5.16	4.93	2	development;metabolic process	cell surface;nucleus	antioxidant activity;structural molecule activity	Pf00059	6320	ENSG00000105472	CLEC11A	B2RAD4; hsa:6320; Q9Y240			0	0	0.01	4.719	0.763	100	100	0.162	-6.64	2.24	-0.39	6.64	6.64	-2.63	1e-17	0.337009	0.0392792	1e-17	1e-17	7.41494e-07	2.25143e-17	0.53464	0.0774588	1.33839e-16
FALSE	Medium	Master Protein	Q14031	Collagen alpha-6(IV) chain [OS=Homo sapiens]	0.046	1.644	1	1	1	1	1691	163.7	9.2	0	1	cell communication;cell growth;development;metabolic process	cell surface;chromosome;extracellular	enzyme regulator activity	Pf01391, Pf01413	1288	ENSG00000197565	COL4A6	hsa:1288; Q12823; Q14031; Q14053; Q5JYH6; Q5JYH8; Q9NQM5; Q9NTX3; Q9UJ76; Q9UMG6; Q9Y4L4	Collagen degradation; Integrin cell surface interactions; ECM proteoglycans; Collagen chain trimerization; Non-integrin membrane-ECM interactions; Anchoring fibril formation; Crosslinking of collagen fibrils; Laminin interactions	Focal adhesion; Focal adhesion: PI3K-Akt-mTOR-signaling pathway; PI3K-Akt signaling pathway; Epithelial to mesenchymal transition in colorectal cancer; Small cell lung cancer; Malignant pleural mesothelioma	17	0	100	100	100	0.438	1.262	2.884	6.64	6.64	6.64	-1.19	0.34	1.53	1e-17	1e-17	1e-17	0.325093	0.47015	0.0927511	2.25143e-17	2.43314e-17	2.35969e-17	0.799419
FALSE	High	Master Protein	Q6ZSR9	Uncharacterized protein FLJ45252 [OS=Homo sapiens]	0	15.293	21	4	17	4	355	38	5.26	43.05	4				Pf15282							0	0	100	100	100	0.593	1.065	1.795	6.64	6.64	6.64	-0.75	0.09	0.84	1e-17	1e-17	1e-17	0.491158	0.719263	0.275149	2.25143e-17	2.43314e-17	2.35969e-17	0.904259
FALSE	High	Master Protein	Q9NTJ3	Structural maintenance of chromosomes protein 4 [OS=Homo sapiens]	0	42.201	17	13	44	13	1288	147.1	6.79	93.85	13	cell differentiation;cell growth;metabolic process	cytosol;membrane;nucleus	RNA binding;structural molecule activity	Pf02463, Pf06470	10051	ENSG00000113810	SMC4	A6NLT9; D3DNL8; hsa:10051; O95752; Q8NDL4; Q9NTJ3; Q9UNT9	Condensation of Prophase Chromosomes; Condensation of Prometaphase Chromosomes	Ciliary landscape	3	0	100	100	100	1.758	1.043	0.593	6.64	6.64	6.64	0.81	0.06	-0.75	1e-17	1e-17	1e-17	0.0285533	0.744963	0.0578404	2.25143e-17	2.43314e-17	2.35969e-17	0.178893
FALSE	Medium	Master Protein	Q9UGJ1	Gamma-tubulin complex component 4 [OS=Homo sapiens]	0.012	2.377	2	1	1	1	667	76	6.65	0	1	cell differentiation;cell growth	cytosol;endoplasmic reticulum;mitochondrion	motor activity	Pf04130, Pf17681	27229	ENSG00000137822	TUBGCP4	B3KNK6; hsa:27229; Q969X3; Q9NVF0; Q9UGJ1	Recruitment of NuMA to mitotic centrosomes; Recruitment of mitotic centrosome proteins and complexes	15q11.2 copy number variation syndrome	3	0	100	100	100	0.386	1.151	2.981	6.64	6.64	6.64	-1.37	0.2	1.58	1e-17	1e-17	1e-17	0.299546	0.590934	0.0832604	2.25143e-17	2.43314e-17	2.35969e-17	0.775984
FALSE	High	Master Protein	Q9Y2R5	28S ribosomal protein S17, mitochondrial [OS=Homo sapiens]	0	5.793	22	1	4	1	130	14.5	9.85	12.01	1	cell organization and biogenesis;cellular homeostasis	cytoskeleton;endosome;Golgi	RNA binding	Pf00366	51373	ENSG00000239789	MRPS17	hsa:51373; Q86X15; Q9Y2R5	Mitochondrial translation initiation; Mitochondrial translation elongation; Mitochondrial translation termination		3	0	100			0.01	0.01		6.64			-6.64	-6.64		1e-17			1e-17	1e-17		2.25143e-17			1.33839e-16
FALSE	Medium	Master Protein	P00450	Ceruloplasmin [OS=Homo sapiens]	0.013	2.315	2	1	1	1	1065	122.1	5.72	0	1	conjugation;metabolic process	cell surface;cytoplasm;cytoskeleton;extracellular	structural molecule activity	Pf00394, Pf07731, Pf07732	1356	ENSG00000047457	CP	hsa:1356; P00450; Q14063; Q2PP18; Q9UKS4	Regulation of Insulin-like Growth Factor (IGF) transport and uptake by Insulin-like Growth Factor Binding Proteins (IGFBPs); Post-translational protein phosphorylation; Metal ion SLC transporters; Iron uptake and transport; Defective SLC40A1 causes hemochromatosis 4 (HFE4) (macrophages); Defective CP causes aceruloplasminemia (ACERULOP)	Ferroptosis; Neurodegeneration with brain iron accumulation (NBIA) subtypes pathway	8	0	0.01	0.102	0.01	100		0.01	-6.64	-3.3	-6.64	6.64		-6.64	1e-17	8.38948e-05	1e-17	1e-17		1e-17	2.25143e-17	0.000190608	2.35969e-17	1.33839e-16
FALSE	Medium	Master Protein	Q9Y5S2	Serine/threonine-protein kinase MRCK beta [OS=Homo sapiens]	0.022	2.04	1	1	2	1	1711	194.2	6.37	0	1	cell growth;cell organization and biogenesis;cellular homeostasis;development;metabolic process	cytoplasm;cytoskeleton;cytosol;endoplasmic reticulum;nucleus	signal transducer activity;structural molecule activity	Pf00069, Pf00130, Pf00780, Pf08826, Pf15796	9578	ENSG00000198752	CDC42BPB	A9JR72; hsa:9578; Q2L7A5; Q86TJ1; Q9ULU5; Q9Y5S2	CDC42 GTPase cycle; RHOQ GTPase cycle; RHOJ GTPase cycle	VEGFA-VEGFR2 signaling pathway	4	0	100			0.01	0.01		6.64			-6.64	-6.64		1e-17			1e-17	1e-17		2.25143e-17			1.33839e-16
FALSE	High	Master Protein	O95834	Echinoderm microtubule-associated protein-like 2 [OS=Homo sapiens]	0	7.195	5	2	4	2	649	70.6	6.32	7.44	2	cell growth;metabolic process	endoplasmic reticulum;nucleus	antioxidant activity;motor activity;structural molecule activity	Pf00400, Pf03451	24139	ENSG00000125746	EML2	B7Z3I2; B7Z3Q9; hsa:24139; K7ERL7; O95834; Q59EN8; Q8N5A2; Q9UG50			0	0	100	100	100	1.076	0.948	0.881	6.64	6.64	6.64	0.11	-0.08	-0.18	1e-17	1e-17	1e-17	0.505865	0.960488	0.440275	2.25143e-17	2.43314e-17	2.35969e-17	0.91043
FALSE	High	Master Protein	Q9Y6A4	Cilia- and flagella-associated protein 20 [OS=Homo sapiens]	0	8.474	21	2	11	2	193	22.8	9.76	6.2	2	cell growth;cell organization and biogenesis;cellular homeostasis;defense response;metabolic process	endoplasmic reticulum;membrane;nucleus		Pf05018	29105	ENSG00000070761	CFAP20	hsa:29105; Q9Y6A4			0	0	100	100	100	0.554	0.974	1.76	6.64	6.64	6.64	-0.85	-0.04	0.82	1e-17	1e-17	1e-17	0.693894	0.911461	0.544667	2.25143e-17	2.43314e-17	2.35969e-17	0.971932
FALSE	High	Master Protein	Q9H4A3	Serine/threonine-protein kinase WNK1 [OS=Homo sapiens]	0	5.422	2	2	4	2	2382	250.6	6.34	4.13	2	cell organization and biogenesis;cellular homeostasis;conjugation;defense response;development;metabolic process	cytoskeleton;cytosol;nucleus	DNA binding;signal transducer activity;structural molecule activity	Pf00069, Pf12202	65125	ENSG00000060237	WNK1	A1L4B0; C5HTZ5; C5HTZ6; C5HTZ7; H6WZW3; hsa:65125; O15052; P54963; Q4VBX9; Q6IFS5; Q86WL5; Q8N673; Q96CZ6; Q9H4A3; Q9P1S9	Stimuli-sensing channels	Ciliary landscape	2	0	100	100	100	0.329	0.309	0.939	6.64	6.64	6.64	-1.6	-1.69	-0.09	1e-17	1e-17	1e-17	0.187417	0.00163999	0.452734	2.25143e-17	2.43314e-17	2.35969e-17	0.639163
FALSE	Medium	Master Protein	P05155	Plasma protease C1 inhibitor [OS=Homo sapiens]	0.035	1.759	1	1	3	1	500	55.1	6.55	1.66	1	coagulation;metabolic process	cell surface;extracellular;nucleus	DNA binding	Pf00079	710	ENSG00000149131	SERPING1	A6NMU0; A8KAI9; B2R6L5; B4E1F0; B4E1H2; hsa:710; P05155; Q16304; Q547W3; Q59EI5; Q7Z455; Q96FE0; Q9UC49; Q9UCF9	Platelet degranulation ; Regulation of Complement cascade; Intrinsic Pathway of Fibrin Clot Formation; Defective SERPING1 causes hereditary angioedema	Complement system; RAS and bradykinin pathways in COVID-19; Kinin-Kallikrein pathway; Complement system in neuronal development and plasticity; Complement and coagulation cascades	9	0	0.01	0.056	0.068	100	100	1.211	-6.64	-4.15	-3.87	6.64	6.64	0.28	1e-17	4.44161e-08	1.36615e-08	1e-17	1e-17	0.967678	2.25143e-17	1.05077e-07	3.13922e-08	1.33839e-16
FALSE	High	Master Protein	O95249	Golgi SNAP receptor complex member 1 [OS=Homo sapiens]	0	11.33	15	2	14	2	250	28.6	9.42	20.07	2	cell growth;conjugation;metabolic process	cytoskeleton;cytosol;extracellular	structural molecule activity	Pf12352	9527	ENSG00000108587	GOSR1	hsa:9527; J3KST5; O75392; O95249	COPI-mediated anterograde transport; Intra-Golgi traffic		2	0	100	100	100	0.824	0.971	1.178	6.64	6.64	6.64	-0.28	-0.04	0.24	1e-17	1e-17	1e-17	0.877488	0.982878	0.884898	2.25143e-17	2.43314e-17	2.35969e-17	0.986561
FALSE	High	Master Protein	Q99933	BAG family molecular chaperone regulator 1 [OS=Homo sapiens]	0.002	3.702	4	1	8	1	345	38.8	7.81	19.15	1	development;metabolic process	cytoskeleton;cytosol;membrane;nucleus	structural molecule activity	Pf00240, Pf02179	573	ENSG00000107262	BAG1	hsa:573; O75315; Q14414; Q53H32; Q5VZE8; Q5VZE9; Q5VZF0; Q96TG2; Q99933; Q9Y2V4	Regulation of HSF1-mediated heat shock response	Androgen receptor signaling pathway	2	0	100	100	100	0.784	0.924	1.179	6.64	6.64	6.64	-0.35	-0.11	0.24	1e-17	1e-17	1e-17	0.850503	0.942295	0.79151	2.25143e-17	2.43314e-17	2.35969e-17	0.985798
FALSE	High	Master Protein	Q08379	Golgin subfamily A member 2 [OS=Homo sapiens]	0	24.392	9	6	15	6	1002	113	5.02	43.31	6	cell differentiation;cell growth;cell organization and biogenesis;cellular homeostasis;conjugation;metabolic process	cytoskeleton;endoplasmic reticulum;extracellular;nucleus	motor activity;structural molecule activity	Pf15070, Pf19046	2801	ENSG00000167110	GOLGA2	A0A0C4DGS5; hsa:2801; Q08379; Q6GRM9; Q9BRB0; Q9NYF9	Deregulated CDK5 triggers multiple neurodegenerative pathways in Alzheimer's disease models; COPI-mediated anterograde transport; Golgi Cisternae Pericentriolar Stack Reorganization; COPII-mediated vesicle transport		4	0	100	100	100	0.487	0.675	1.385	6.64	6.64	6.64	-1.04	-0.57	0.47	1e-17	1e-17	1e-17	0.225204	0.228445	0.65541	2.25143e-17	2.43314e-17	2.35969e-17	0.685675
FALSE	High	Master Protein	Q9H2U1	ATP-dependent DNA/RNA helicase DHX36 [OS=Homo sapiens]	0	6.252	3	2	2	2	1008	114.7	7.68	3.63	2	cell growth;cellular component movement;coagulation;defense response;metabolic process	cytosol;endosome;membrane;nucleus	RNA binding;structural molecule activity	Pf00270, Pf00271, Pf04408, Pf07717	170506	ENSG00000174953	DHX36	B2RB00; hsa:170506; Q70JU3; Q8IYE5; Q9H2U1; Q9P240	DEx/H-box helicases activate type I IFN and inflammatory cytokines production	VEGFA-VEGFR2 signaling pathway	2	0	100	100	100	0.462	0.686	1.485	6.64	6.64	6.64	-1.11	-0.54	0.57	1e-17	1e-17	1e-17	0.452466	0.362151	0.842314	2.25143e-17	2.43314e-17	2.35969e-17	0.887079
FALSE	High	Master Protein	Q8N1S5	Zinc transporter ZIP11 [OS=Homo sapiens]	0	7.154	11	2	6	2	342	35.4	5.6	11.76	2	conjugation	cytoplasm;cytoskeleton;extracellular;membrane;nucleus	catalytic activity	Pf02535	201266	ENSG00000133195	SLC39A11	B2R8H7; hsa:201266; Q8N1S5; Q8WZ81		Nuclear receptors meta-pathway; NRF2 pathway; Zinc homeostasis	3	0	100	100	100	0.213	0.8	3.75	6.64	6.64	6.64	-2.23	-0.32	1.91	1e-17	1e-17	1e-17	0.0194917	0.583342	0.039777	2.25143e-17	2.43314e-17	2.35969e-17	0.132906
FALSE	High	Master Protein	Q15910	Histone-lysine N-methyltransferase EZH2 [OS=Homo sapiens]	0.002	3.289	3	1	3	1	746	85.3	7.02	0	1	cell death;cell differentiation;cell growth;cell organization and biogenesis;cell proliferation;cellular homeostasis;coagulation;defense response;metabolic process	membrane;nucleus	RNA binding;structural molecule activity	Pf00856, Pf11616, Pf18118, Pf18264	2146	ENSG00000106462	EZH2	B2RAQ1; B3KS30; B7Z1D6; B7Z7L6; hsa:2146; Q15755; Q15910; Q75MG3; Q92857; Q96FI6	HCMV Early Events; Transcriptional Regulation by E2F6; Regulation of PTEN gene transcription; Defective pyroptosis; Activation of anterior HOX genes in hindbrain development during early embryogenesis; Oxidative Stress Induced Senescence; PRC2 methylates histones and DNA; PKMTs methylate histone lysines	Cell differentiation - expanded index; Histone modifications; Endoderm differentiation; Interactome of polycomb repressive complex 2 (PRC2) ; MECP2 and associated Rett syndrome; Tumor suppressor activity of SMARCB1; Epithelial to mesenchymal transition in colorectal cancer; lncRNA in canonical Wnt signaling and colorectal cancer; ncRNAs involved in Wnt signaling in hepatocellular carcinoma; FBXL1…	19	0	100		100	0.01	0.74	100	6.64		6.64	-6.64	-0.44	6.64	1e-17		1e-17	1e-17	0.498389	1e-17	2.25143e-17		2.35969e-17	1.33839e-16
FALSE	High	Master Protein	Q9UBR2	Cathepsin Z [OS=Homo sapiens]	0	18.75	17	3	9	3	303	33.8	7.11	32.52	3	cell organization and biogenesis;cellular homeostasis;defense response;metabolic process	cell surface;cytoplasm;cytoskeleton;extracellular;mitochondrion;nucleus	structural molecule activity	Pf00112	1522	ENSG00000101160	CTSZ	B2RC40; hsa:1522; O75331; Q9UBR2; Q9UQV5; Q9UQV6	Neutrophil degranulation; COPII-mediated vesicle transport; Lysosome Vesicle Biogenesis; Metabolism of Angiotensinogen to Angiotensins; Cargo concentration in the ER		5	0	100	100	100	0.168	0.837	4.966	6.64	6.64	6.64	-2.57	-0.26	2.31	1e-17	1e-17	1e-17	1.58464e-06	0.523647	6.91185e-06	2.25143e-17	2.43314e-17	2.35969e-17	1.78862e-05
FALSE	Medium	Master Protein	Q7Z4G4	tRNA (guanine(10)-N2)-methyltransferase homolog [OS=Homo sapiens]	0.047	1.639	3	1	2	1	463	53.4	7.78	0	1	cellular component movement;cellular homeostasis	nucleus	RNA binding;structural molecule activity	Pf01170	60487	ENSG00000066651	TRMT11	E1P570; hsa:60487; Q5JY11; Q6PGQ5; Q7Z4G4; Q9HC13	tRNA modification in the nucleus and cytosol		1	0	100	100	100	0.7	0.902	1.288	6.64	6.64	6.64	-0.51	-0.15	0.37	1e-17	1e-17	1e-17	0.999864	0.847756	0.902199	2.25143e-17	2.43314e-17	2.35969e-17	0.999981
FALSE	High	Master Protein	P09132	Signal recognition particle 19 kDa protein [OS=Homo sapiens]	0	11.652	36	3	13	3	144	16.1	9.85	37.4	3	cell growth;conjugation	cytosol;Golgi;membrane;nucleus	RNA binding	Pf01922	6728	ENSG00000153037	SRP19	B2R4E9; D6RCQ5; hsa:6728; P09132; Q05D77; Q96FG6	SRP-dependent cotranslational protein targeting to membrane		1	0	100	100	100	0.593	0.517	0.872	6.64	6.64	6.64	-0.75	-0.95	-0.2	1e-17	1e-17	1e-17	0.56994	0.0464165	0.361652	2.25143e-17	2.43314e-17	2.35969e-17	0.938968
FALSE	Medium	Master Protein	O95989	Diphosphoinositol polyphosphate phosphohydrolase 1 [OS=Homo sapiens]	0.01	2.451	12	1	1	1	172	19.5	6.34	0	1	cell death;cellular component movement;cellular homeostasis	cytosol;membrane;nucleus	structural molecule activity	Pf00293	11165	ENSG00000272325	NUDT3	B2R8N4; hsa:11165; O95989	Synthesis of pyrophosphates in the cytosol		1	0	100	100	100	1.299	1.014	0.781	6.64	6.64	6.64	0.38	0.02	-0.36	1e-17	1e-17	1e-17	0.284888	0.815605	0.334116	2.25143e-17	2.43314e-17	2.35969e-17	0.759702
FALSE	High	Master Protein	Q13033	Striatin-3 [OS=Homo sapiens]	0.001	3.878	5	2	4	2	797	87.2	5.36	8.83	2	metabolic process	cytoplasm;cytoskeleton;extracellular;membrane;nucleus	structural molecule activity	Pf00400, Pf08232	29966	ENSG00000196792	STRN3	A2RTX7; A6NHZ7; hsa:29966; Q13033; Q9NRA5			0	0	100	100	100	0.573	0.798	1.393	6.64	6.64	6.64	-0.8	-0.32	0.48	1e-17	1e-17	1e-17	0.536289	0.546975	0.820687	2.25143e-17	2.43314e-17	2.35969e-17	0.931075
FALSE	High	Master Protein	Q8IUR0	Trafficking protein particle complex subunit 5 [OS=Homo sapiens]	0.007	2.732	5	1	3	1	188	20.8	9.66	4.25	1	conjugation	cytosol;extracellular;mitochondrion;nucleus		Pf04051	126003	ENSG00000181029	TRAPPC5	A8K7I6; hsa:126003; Q8IUR0	COPII-mediated vesicle transport; RAB GEFs exchange GTP for GDP on RABs		2	0	100	100	100	0.634	1.207	1.902	6.64	6.64	6.64	-0.66	0.27	0.93	1e-17	1e-17	1e-17	0.85863	0.429931	0.431239	2.25143e-17	2.43314e-17	2.35969e-17	0.985798
FALSE	High	Master Protein	Q9P2W9	Syntaxin-18 [OS=Homo sapiens]	0.001	4.307	4	2	4	2	335	38.7	5.49	1.75	2	cell growth;conjugation;metabolic process	cytoskeleton;extracellular	structural molecule activity	Pf10496	53407	ENSG00000168818	STX18	hsa:53407; Q596L3; Q5TZP5; Q9P2W9	COPI-dependent Golgi-to-ER retrograde traffic		1	0	100	100	100	0.596	0.937	1.573	6.64	6.64	6.64	-0.75	-0.09	0.65	1e-17	1e-17	1e-17	0.632673	0.930387	0.602762	2.25143e-17	2.43314e-17	2.35969e-17	0.961062
FALSE	High	Master Protein	Q8N1G0	Zinc finger protein 687 [OS=Homo sapiens]	0	8.661	5	3	14	3	1237	129.4	8.19	20.87	3		cytosol;membrane	RNA binding;structural molecule activity	Pf00096, Pf16622	57592	ENSG00000143373	ZNF687	D3DV17; hsa:57592; Q68DQ8; Q8N1G0; Q9H937; Q9P2A7			0	0	100	100	100	0.873	0.633	0.725	6.64	6.64	6.64	-0.2	-0.66	-0.46	1e-17	1e-17	1e-17	0.76994	0.219924	0.270914	2.25143e-17	2.43314e-17	2.35969e-17	0.983441
FALSE	High	Master Protein	P49593	Protein phosphatase 1F [OS=Homo sapiens]	0	9.277	10	2	8	2	454	49.8	5.1	15.87	2	cell organization and biogenesis;cellular homeostasis;development;metabolic process	cytosol;membrane;nucleus	structural molecule activity	Pf00481	9647	ENSG00000100034	PPM1F	A8K6G3; B7Z2C3; hsa:9647; P49593; Q96PM2	Negative regulation of NMDA receptor-mediated neuronal transmission		1	0	100	100	100	1.453	1.897	1.305	6.64	6.64	6.64	0.54	0.92	0.38	1e-17	1e-17	1e-17	0.187801	0.0416984	0.990062	2.25143e-17	2.43314e-17	2.35969e-17	0.639163
FALSE	High	Master Protein	P14384	Carboxypeptidase M [OS=Homo sapiens]	0.001	3.735	6	1	6	1	443	50.5	7.36	7.33	1	cell organization and biogenesis;cellular homeostasis;metabolic process	cell surface;cytoplasm;cytoskeleton	structural molecule activity	Pf00246, Pf13620	1368	ENSG00000135678	CPM	B2R800; hsa:1368; P14384; Q9H2K9	Post-translational modification: synthesis of GPI-anchored proteins		1	0	100	100	100	0.267	1.186	4.441	6.64	6.64	6.64	-1.9	0.25	2.15	1e-17	1e-17	1e-17	0.079605	0.505564	0.0104839	2.25143e-17	2.43314e-17	2.35969e-17	0.384076
FALSE	High	Master Protein	O43318	Mitogen-activated protein kinase kinase kinase 7 [OS=Homo sapiens]	0.005	2.977	3	1	5	1	606	67.2	7.11	2.27	1	cell organization and biogenesis;cellular homeostasis;coagulation;development;metabolic process	cytoplasm;cytoskeleton;cytosol;mitochondrion	antioxidant activity;signal transducer activity;structural molecule activity	Pf07714	6885	ENSG00000135341	MAP3K7	B2RE27; E1P523; hsa:6885; O43317; O43318; O43319; Q5TDN2; Q5TDN3; Q5TDT7; Q9NTR3; Q9NZ70	FCERI mediated NF-kB activation; Downstream TCR signaling; Activation of NF-kappaB in B cells; CLEC7A (Dectin-1) signaling; Ub-specific processing proteases; TRAF6-mediated induction of TAK1 complex within TLR4 complex; IRAK2 mediated activation of TAK1 complex upon TLR7/8 or 9 stimulation; Ca2+ pathway; JNK (c-Jun kinases) phosphorylation and activation mediated by activated human TAK1; NOD1/2 S…	IL-1 signaling pathway; RANKL/RANK signaling pathway; TNF-related weak inducer of apoptosis (TWEAK) signaling pathway; IL-17 signaling pathway; B cell receptor signaling pathway; TNF-alpha signaling pathway; Ebstein-Barr virus LMP1 signaling; Interleukin-1 (IL-1) structural pathway; Cardiac hypertrophic response; Nod-like receptor (NLR) signaling pathway; Fas ligand pathway and stress induction o…	49	0	100	100	100	0.739	1.014	1.372	6.64	6.64	6.64	-0.44	0.02	0.46	1e-17	1e-17	1e-17	0.930538	0.84832	0.947282	2.25143e-17	2.43314e-17	2.35969e-17	0.992849
FALSE	High	Master Protein	Q969M3	Protein YIPF5 [OS=Homo sapiens]	0.001	3.94	5	1	9	1	257	28	4.36	19.63	1	conjugation;metabolic process	cytoskeleton;extracellular;membrane;nucleus			81555	ENSG00000145817	YIPF5	D3DQF5; hsa:81555; Q4VSN6; Q53EX4; Q8NHE5; Q969M3; Q9H338; Q9H3U4			0	0	100	100	100	0.846	0.752	0.888	6.64	6.64	6.64	-0.24	-0.41	-0.17	1e-17	1e-17	1e-17	0.853655	0.425687	0.413202	2.25143e-17	2.43314e-17	2.35969e-17	0.985798
FALSE	High	Master Protein	A2RRP1	Neuroblastoma-amplified sequence [OS=Homo sapiens]	0.001	4.268	1	2	3	2	2371	268.4	5.96	4.33	2	cellular component movement;cellular homeostasis;conjugation;metabolic process	cytoskeleton;cytosol;extracellular	structural molecule activity	Pf08314, Pf15492	51594	ENSG00000151779	NBAS	A2RRP1; hsa:51594; O95790; Q2VPJ7; Q53TK6; Q86V39; Q8NFY8; Q9Y3W5	COPI-dependent Golgi-to-ER retrograde traffic		1	0	100	100	100	1.102	0.839	0.761	6.64	6.64	6.64	0.14	-0.25	-0.39	1e-17	1e-17	1e-17	0.430023	0.658102	0.248914	2.25143e-17	2.43314e-17	2.35969e-17	0.874271
FALSE	High	Master Protein	O15091	Mitochondrial ribonuclease P catalytic subunit [OS=Homo sapiens]	0.002	3.305	2	1	7	1	583	67.3	8.78	10.63	1	cellular component movement;cellular homeostasis	endosome;membrane	structural molecule activity	Pf16953	9692	ENSG00000100890	PRORP	B4DXD9; B4E0S8; B4E211; C4AM93; D3DS99; D3DSA1; hsa:9692; O15091; Q86SZ4; Q86YB5; Q8N5L5	tRNA processing in the mitochondrion; tRNA modification in the mitochondrion; rRNA processing in the mitochondrion		3	0	100	100	100	0.591	0.784	1.327	6.64	6.64	6.64	-0.76	-0.35	0.41	1e-17	1e-17	1e-17	0.775356	0.603721	0.971918	2.25143e-17	2.43314e-17	2.35969e-17	0.983529
FALSE	High	Master Protein	P23142	Fibulin-1 [OS=Homo sapiens]	0	70.011	20	10	40	10	703	77.2	5.22	91.81	10	cell growth;cell organization and biogenesis;cellular homeostasis;coagulation;defense response;metabolic process	cell surface;chromosome	antioxidant activity;DNA binding;enzyme regulator activity;structural molecule activity	Pf07645, Pf12662	2192	ENSG00000077942	FBLN1	B0QY42; B1AHL4; hsa:2192; P23142; P23143; P23144; P37888; Q5TIC4; Q8TBH8; Q9HBQ5; Q9UC21; Q9UGR4; Q9UH41	Molecules associated with elastic fibres		1	0	0.01	0.565	0.059	66.571	6.894	0.104	-6.64	-0.82	-4.1	6.06	2.79	-3.27	1e-17	0.000898034	1.93877e-10	1e-17	5.91209e-11	1.4877e-13	2.25143e-17	0.0019885	4.51783e-10	1.33839e-16
FALSE	High	Master Protein	Q96H20	Vacuolar-sorting protein SNF8 [OS=Homo sapiens]	0.001	3.872	19	2	3	2	258	28.8	6.65	2.11	2	cell growth;cell organization and biogenesis;cellular homeostasis;conjugation;metabolic process	cytoplasm;cytoskeleton;cytosol;membrane;mitochondrion;nucleus	structural molecule activity	Pf04157	11267	ENSG00000159210	SNF8	hsa:11267; Q8IXY3; Q96H20; Q9UN50	HCMV Late Events; Endosomal Sorting Complex Required For Transport (ESCRT)		2	0	100	100	100	1.783	0.851	0.478	6.64	6.64	6.64	0.83	-0.23	-1.07	1e-17	1e-17	1e-17	0.0932483	0.693683	0.0309672	2.25143e-17	2.43314e-17	2.35969e-17	0.424329
FALSE	High	Master Protein	Q9H4B0	Probable tRNA N6-adenosine threonylcarbamoyltransferase, mitochondrial [OS=Homo sapiens]	0.001	4.577	7	2	2	2	414	45.1	8.56	0	2	cellular component movement;cellular homeostasis	endosome	structural molecule activity	Pf00814	64172	ENSG00000128694	OSGEPL1	hsa:64172; Q96EV9; Q96NH5; Q9H4B0			0	0	100	100	100	0.851	1.266	1.487	6.64	6.64	6.64	-0.23	0.34	0.57	1e-17	1e-17	1e-17	0.733667	0.403937	0.782533	2.25143e-17	2.43314e-17	2.35969e-17	0.980195
FALSE	High	Master Protein	O60678	Protein arginine N-methyltransferase 3 [OS=Homo sapiens]	0	15.948	12	5	22	5	531	59.9	5.35	31.63	5	cell organization and biogenesis;cellular homeostasis;metabolic process	cytosol;nucleus	protein binding;structural molecule activity	Pf06325	10196	ENSG00000185238	PRMT3	A0A0A0MSN7; B4DUC7; hsa:10196; O60678	RMTs methylate histone arginines; Protein methylation	Nitric oxide metabolism in cystic fibrosis	3	0	100	100	100	0.627	1.14	1.819	6.64	6.64	6.64	-0.67	0.19	0.86	1e-17	1e-17	1e-17	0.682937	0.602344	0.318792	2.25143e-17	2.43314e-17	2.35969e-17	0.971932
FALSE	High	Master Protein	Q5JRA6	Transport and Golgi organization protein 1 homolog [OS=Homo sapiens]	0.005	2.958	1	1	4	1	1907	213.6	4.84	9.38	1	cell growth;coagulation;conjugation;defense response;metabolic process	cytoskeleton;extracellular;nucleus	structural molecule activity	Pf07653	375056	ENSG00000154305	MIA3	A8K2S0; A8MT05; A8MT13; B7Z430; hsa:375056; Q14083; Q3S4X3; Q5JRA5; Q5JRA6; Q5JRB0; Q5JRB1; Q5JRB2; Q6UVY8; Q86Y60; Q8N8M5; Q92580	Regulation of Insulin-like Growth Factor (IGF) transport and uptake by Insulin-like Growth Factor Binding Proteins (IGFBPs); Post-translational protein phosphorylation; Cargo concentration in the ER	Type I collagen synthesis in the context of osteogenesis imperfecta	4	0	100	100	100	0.616	0.786	1.276	6.64	6.64	6.64	-0.7	-0.35	0.35	1e-17	1e-17	1e-17	0.809794	0.57348	0.875014	2.25143e-17	2.43314e-17	2.35969e-17	0.985798
FALSE	High	Master Protein	Q15369	Elongin-C [OS=Homo sapiens]	0	18.819	41	3	20	3	112	12.5	4.78	69.31	3	cell organization and biogenesis;cellular homeostasis;metabolic process	cytosol;membrane;nucleus		Pf03931	6921	ENSG00000154582	ELOC	E5RGD9; hsa:6921; Q15369; Q567Q6	Antigen processing: Ubiquitination & Proteasome degradation; Oxygen-dependent proline hydroxylation of Hypoxia-inducible Factor Alpha; Vif-mediated degradation of APOBEC3G; Neddylation; Regulation of expression of SLITs and ROBOs; RNA Polymerase II Pre-transcription Events; TP53 Regulates Transcription of DNA Repair Genes; Inactivation of CSF3 (G-CSF) signaling; Formation of RNA Pol II elongation…	Dual hijack model of Vif in HIV infection; VEGFA-VEGFR2 signaling pathway; Type 2 papillary renal cell carcinoma; Hijack of ubiquitination by SARS-CoV-2	21	0	100	100	100	1.526	1.327	0.87	6.64	6.64	6.64	0.61	0.41	-0.2	1e-17	1e-17	1e-17	0.0861657	0.172916	0.481945	2.25143e-17	2.43314e-17	2.35969e-17	0.40297
FALSE	Medium	Master Protein	P98170	E3 ubiquitin-protein ligase XIAP [OS=Homo sapiens]	0.028	1.858	3	1	1	1	497	56.6	6.65	0	1	cell death;cell organization and biogenesis;cellular homeostasis;coagulation;development;metabolic process	cytosol;endoplasmic reticulum;membrane;nucleus	DNA binding;structural molecule activity	Pf00653, Pf13920	331	ENSG00000101966	XIAP	D3DTF2; hsa:331; P98170; Q9NQ14	Regulation of PTEN stability and activity; Regulation of necroptotic cell death; TNFR1-induced NFkappaB signaling pathway; Regulation of the apoptosome activity; Regulation of PTEN localization; Deactivation of the beta-catenin transactivating complex; Regulation of TNFR1 signaling; Activation of caspases through apoptosome-mediated cleavage; SMAC (DIABLO) binds to IAPs ; SMAC(DIABLO)-mediated di…	Nucleotide-binding oligomerization domain (NOD) pathway; Apoptosis modulation and signaling; Apoptosis; Focal adhesion; Copper homeostasis; NO/cGMP/PKG mediated neuroprotection; Complement system in neuronal development and plasticity	19	0	100	100	100	0.817	1.455	1.78	6.64	6.64	6.64	-0.29	0.54	0.83	1e-17	1e-17	1e-17	0.790192	0.238507	0.543645	2.25143e-17	2.43314e-17	2.35969e-17	0.984968
FALSE	High	Master Protein	Q96ST2	Protein IWS1 homolog [OS=Homo sapiens]	0.007	2.652	2	1	7	1	819	91.9	4.69	4.46	1	cellular component movement;cellular homeostasis;conjugation;metabolic process	membrane		Pf08711	55677	ENSG00000163166	IWS1	hsa:55677; Q2TB65; Q6P157; Q8N3E8; Q96MI7; Q96ST2; Q9NV97; Q9NWH8	Formation of RNA Pol II elongation complex ; RNA Polymerase II Pre-transcription Events		3	0	100	100	100	0.595	0.688	1.156	6.64	6.64	6.64	-0.75	-0.54	0.21	1e-17	1e-17	1e-17	0.789335	0.362144	0.776439	2.25143e-17	2.43314e-17	2.35969e-17	0.984505
FALSE	Medium	Master Protein	Q9Y6Q9	Nuclear receptor coactivator 3 [OS=Homo sapiens]	0.011	2.423	1	1	2	1	1424	155.2	7.47	0	1	cell organization and biogenesis;cellular homeostasis;metabolic process	cytosol;membrane;nucleus	structural molecule activity	Pf00989, Pf07469, Pf08815, Pf08832, Pf14598, Pf16279, Pf16665	8202	ENSG00000124151	NCOA3	A4LAZ5; hsa:8202; Q0VF45; Q5JYD9; Q5JYE0; Q9BR49; Q9UPC9; Q9UPG4; Q9UPG7; Q9Y6Q9	MAPK6/MAPK4 signaling; PPARA activates gene expression; Transcriptional regulation of white adipocyte differentiation; Activation of anterior HOX genes in hindbrain development during early embryogenesis; Estrogen-dependent gene expression	Androgen receptor signaling pathway; Pregnane X receptor pathway; Nuclear receptors meta-pathway; Breast cancer pathway; EGF/EGFR signaling pathway	10	0	100		100	0.01	0.983	100	6.64		6.64	-6.64	-0.02	6.64	1e-17		1e-17	1e-17	0.957105	1e-17	2.25143e-17		2.35969e-17	1.33839e-16
FALSE	High	Master Protein	Q86Y56	Dynein axonemal assembly factor 5 [OS=Homo sapiens]	0	13.18	7	4	22	4	855	93.5	6.42	30.65	4	cell growth;metabolic process	nucleus	structural molecule activity		54919	ENSG00000164818	DNAAF5	hsa:54919; Q69YL1; Q86Y56; Q96FI9; Q9NX75		Ciliopathies	1	0	100	100	100	0.773	1.105	1.429	6.64	6.64	6.64	-0.37	0.14	0.52	1e-17	1e-17	1e-17	0.977822	0.677178	0.734111	2.25143e-17	2.43314e-17	2.35969e-17	0.997943
FALSE	High	Master Protein	Q8N6H7	ADP-ribosylation factor GTPase-activating protein 2 [OS=Homo sapiens]	0	20.087	23	6	22	6	521	56.7	7.99	50.09	6	cell growth;conjugation	cytoplasm;cytoskeleton;cytosol;extracellular	DNA binding;structural molecule activity	Pf01412	84364	ENSG00000149182	ARFGAP2	B4DX29; B7Z9M7; D3DQQ9; hsa:84364; Q3LIF2; Q8N3I1; Q8N6H7; Q96SX7	CDC42 GTPase cycle; COPI-dependent Golgi-to-ER retrograde traffic; COPI-mediated anterograde transport	IL-18 signaling pathway	4	0	100	100	100	0.841	0.733	0.871	6.64	6.64	6.64	-0.25	-0.45	-0.2	1e-17	1e-17	1e-17	0.985247	0.341373	0.447593	2.25143e-17	2.43314e-17	2.35969e-17	0.997943
FALSE	Medium	Master Protein	Q8N5U6	RING finger protein 10 [OS=Homo sapiens]	0.013	2.276	2	1	3	1	811	89.9	6.92	0	1	cell organization and biogenesis;cellular homeostasis;defense response;metabolic process	membrane;nucleus	RNA binding;structural molecule activity	Pf13639	9921	ENSG00000022840	RNF10	hsa:9921; Q8N5U6; Q92550; Q9NPP8; Q9ULW4			0	0	100		100	0.01	1.41	100	6.64		6.64	-6.64	0.5	6.64	1e-17		1e-17	1e-17	0.241159	1e-17	2.25143e-17		2.35969e-17	1.33839e-16
FALSE	High	Master Protein	O43678	NADH dehydrogenase [ubiquinone] 1 alpha subcomplex subunit 2 [OS=Homo sapiens]	0.007	2.706	21	1	1	1	99	10.9	9.57	2.23	1	cell growth;cellular homeostasis;conjugation;defense response	cytoskeleton;endosome	catalytic activity	Pf05047	4695	ENSG00000131495	NDUFA2	D6RJD6; hsa:4695; O43678; Q6IAY8	Complex I biogenesis	Electron transport chain: OXPHOS system in mitochondria; Nonalcoholic fatty liver disease; Oxidative phosphorylation	5	0	100	100	100	1.411	1.14	0.808	6.64	6.64	6.64	0.5	0.19	-0.31	1e-17	1e-17	1e-17	0.208513	0.573194	0.377315	2.25143e-17	2.43314e-17	2.35969e-17	0.659884
FALSE	High	Master Protein	Q8N129	Protein canopy homolog 4 [OS=Homo sapiens]	0	6.665	13	2	3	2	248	28.3	4.64	6.81	2	metabolic process	cell surface	antioxidant activity	Pf11938	245812	ENSG00000166997	CNPY4	hsa:245812; Q8N129; Q8WUN9			0	0	100	100	100	1.837	0.605	0.329	6.64	6.64	6.64	0.88	-0.72	-1.6	1e-17	1e-17	1e-17	0.0987366	0.151834	0.00188237	2.25143e-17	2.43314e-17	2.35969e-17	0.439672
FALSE	High	Master Protein	Q9UBP6	tRNA (guanine-N(7)-)-methyltransferase [OS=Homo sapiens]	0	15.462	14	2	13	2	276	31.5	7.64	33.11	2	cellular component movement;cellular homeostasis	cytosol;membrane;nucleus	RNA binding;structural molecule activity	Pf02390	4234	ENSG00000037897	METTL1	B2RBX1; H7BXF2; hsa:4234; Q14105; Q53FS9; Q9UBP6	tRNA modification in the nucleus and cytosol		1	0	100	100	100	0.927	1.219	1.315	6.64	6.64	6.64	-0.11	0.29	0.4	1e-17	1e-17	1e-17	0.757581	0.408458	0.760217	2.25143e-17	2.43314e-17	2.35969e-17	0.981909
FALSE	High	Master Protein	O15027	Protein transport protein Sec16A [OS=Homo sapiens]	0	11.772	3	4	13	4	2357	251.7	5.8	8.92	4	cell growth;cellular homeostasis;coagulation;conjugation;metabolic process	cytoskeleton;cytosol;extracellular;nucleus		Pf12931, Pf12932	9919	ENSG00000148396	SEC16A	A1YCA4; hsa:9919; J3KNL6; O15027; Q4G0D7; Q5SXP0; Q5SXP1; Q8N347; Q96HP1	COPII-mediated vesicle transport		1	0	100	100	100	0.393	0.804	2.047	6.64	6.64	6.64	-1.35	-0.31	1.03	1e-17	1e-17	1e-17	0.169302	0.528689	0.3022	2.25143e-17	2.43314e-17	2.35969e-17	0.60991
FALSE	High	Master Protein	Q86SQ9	Dehydrodolichyl diphosphate synthase complex subunit DHDDS [OS=Homo sapiens]	0.003	3.225	7	1	1	1	333	38.6	8.28	2.15	1	cell organization and biogenesis;cellular homeostasis	cytoskeleton;extracellular;nucleus	structural molecule activity	Pf01255	79947	ENSG00000117682	DHDDS	B7Z4B9; B7ZB20; D3DPK7; D3DPK8; D3DPK9; E9KL43; hsa:79947; Q5T0A4; Q86SQ9; Q8NE90; Q9BTG5; Q9BTK3; Q9H905	Synthesis of Dolichyl-phosphate; Defective DHDDS causes RP59		2	0	100		100	0.01	1.057	100	6.64		6.64	-6.64	0.08	6.64	1e-17		1e-17	1e-17	0.772414	1e-17	2.25143e-17		2.35969e-17	1.33839e-16
FALSE	High	Master Protein	P54105	Methylosome subunit pICln [OS=Homo sapiens]	0	21.506	34	4	16	4	237	26.2	4.11	43.45	4	cell growth;cellular component movement;cellular homeostasis;conjugation	cytoplasm;cytoskeleton;cytosol;endoplasmic reticulum;membrane;nucleus		Pf03517	1207	ENSG00000074201	CLNS1A	B2RCS9; hsa:1207; P54105; Q0VDK6; Q9NRD2; Q9NRD3	snRNP Assembly		1	0	100	100	100	0.279	0.454	1.627	6.64	6.64	6.64	-1.84	-1.14	0.7	1e-17	1e-17	1e-17	0.010803	0.00787236	0.416337	2.25143e-17	2.43314e-17	2.35969e-17	0.0802431
FALSE	High	Master Protein	Q8IUF8	Ribosomal oxygenase 2 [OS=Homo sapiens]	0	5.774	6	1	5	1	465	52.8	6.7	4.77	1	cell organization and biogenesis;cellular homeostasis;metabolic process	cytosol;membrane;nucleus	structural molecule activity	Pf08007, Pf20514	84864	ENSG00000170854	RIOX2	D3DN35; hsa:84864; Q6AHW4; Q6SKS0; Q8IU69; Q8IUF6; Q8IUF7; Q8IUF8; Q96C17; Q96KB0	HDMs demethylate histones		1	0	100	100	100	0.98	1.489	1.519	6.64	6.64	6.64	-0.03	0.57	0.6	1e-17	1e-17	1e-17	0.553038	0.181844	0.774362	2.25143e-17	2.43314e-17	2.35969e-17	0.933164
FALSE	High	Master Protein	Q92785	Zinc finger protein ubi-d4 [OS=Homo sapiens]	0.006	2.836	4	1	1	1	391	44.1	6.33	2.09	1	cell growth;defense response;development;metabolic process	cytosol;endoplasmic reticulum;membrane;nucleus	structural molecule activity	Pf00628, Pf14051	5977	ENSG00000133884	DPF2	A8K7C9; B4DT58; hsa:5977; Q92785		Tumor suppressor activity of SMARCB1	1	0	100	100	100	0.778	0.694	0.892	6.64	6.64	6.64	-0.36	-0.53	-0.17	1e-17	1e-17	1e-17	0.857713	0.382374	0.408809	2.25143e-17	2.43314e-17	2.35969e-17	0.985798
FALSE	Medium	Master Protein	O43663	Protein regulator of cytokinesis 1 [OS=Homo sapiens]	0.021	2.06	2	1	4	1	620	71.6	6.68	9.09	1	cell differentiation;cell growth;metabolic process	cell surface;cytoplasm;cytoskeleton;cytosol;endoplasmic reticulum;membrane;nucleus	motor activity;structural molecule activity	Pf03999	9055	ENSG00000198901	PRC1	A6NC44; B4DLR1; H9KV59; hsa:9055; O43663; Q9BSB6	RHO GTPases activate CIT		1	0	100		100	0.01	0.519	100	6.64		6.64	-6.64	-0.95	6.64	1e-17		1e-17	1e-17	0.105342	1e-17	2.25143e-17		2.35969e-17	1.33839e-16
FALSE	High	Master Protein	Q01415	N-acetylgalactosamine kinase [OS=Homo sapiens]	0	8.804	11	3	13	3	458	50.3	6.61	28.62	3	cellular homeostasis	cytosol	signal transducer activity;structural molecule activity	Pf00288, Pf08544, Pf10509	2585	ENSG00000156958	GALK2	hsa:2585; Q01415; Q7Z4Q4			0	0	100	100	100	1.082	0.971	0.897	6.64	6.64	6.64	0.11	-0.04	-0.16	1e-17	1e-17	1e-17	0.518941	0.963978	0.470006	2.25143e-17	2.43314e-17	2.35969e-17	0.919947
FALSE	High	Master Protein	Q9BQC3	2-(3-amino-3-carboxypropyl)histidine synthase subunit 2 [OS=Homo sapiens]	0	5.38	9	2	2	2	489	52.1	5.53	2.33	2	cell organization and biogenesis;cellular homeostasis	cytosol	structural molecule activity	Pf01866	1802	ENSG00000132768	DPH2	A8MVC9; B2RDE3; B4DNI8; hsa:1802; O60623; Q9BQC3	Synthesis of diphthamide-EEF2		1	0	100		100	0.01	0.82	100	6.64		6.64	-6.64	-0.29	6.64	1e-17		1e-17	1e-17	0.677689	1e-17	2.25143e-17		2.35969e-17	1.33839e-16
FALSE	High	Master Protein	Q9HCY8	Protein S100-A14 [OS=Homo sapiens]	0	16.237	36	3	8	3	104	11.7	5.24	23.96	3	coagulation;development;metabolic process	cell surface;nucleus	antioxidant activity;structural molecule activity	Pf01023	57402	ENSG00000189334	S100A14	hsa:57402; Q5RHT0; Q9HCY8			0	0	100	100	100	4.399	1.242	0.282	6.64	6.64	6.64	2.14	0.31	-1.83	1e-17	1e-17	1e-17	0.000294822	0.486855	0.000283393	2.25143e-17	2.43314e-17	2.35969e-17	0.00288352
FALSE	Medium	Master Protein	P51587	Breast cancer type 2 susceptibility protein [OS=Homo sapiens]	0.022	2.023	1	1	2	1	3418	384	6.71	0	1	cell differentiation;cell growth;cell organization and biogenesis;cell proliferation;cellular homeostasis;coagulation;defense response;development;metabolic process	cytosol;endoplasmic reticulum;membrane;nucleus	motor activity;RNA binding;structural molecule activity	Pf00634, Pf09103, Pf09104, Pf09121, Pf09169	675	ENSG00000139618	BRCA2	hsa:675; O00183; O15008; P51587; Q13879; Q5TBJ7	Meiotic recombination; Presynaptic phase of homologous DNA pairing and strand exchange; Resolution of D-loop Structures through Holliday Junction Intermediates; Resolution of D-loop Structures through Synthesis-Dependent Strand Annealing (SDSA); Defective HDR through Homologous Recombination (HRR) due to BRCA1 loss-of-function; Defective HDR through Homologous Recombination Repair (HRR) due to PA…	Homologous recombination; Glioblastoma signaling pathways; Breast cancer pathway; Pancreatic adenocarcinoma pathway; Male infertility; DNA repair pathways, full network	15	0	0.01	0.01	0.01				-6.64	-6.64	-6.64				1e-17	1e-17	1e-17				2.25143e-17	2.43314e-17	2.35969e-17
FALSE	High	Master Protein	P42356	Phosphatidylinositol 4-kinase alpha [OS=Homo sapiens]	0	11.664	3	3	15	3	2102	236.7	7.06	14.81	3	cell growth;cellular homeostasis;development;metabolic process	cytoplasm;cytoskeleton;cytosol;extracellular;nucleus	signal transducer activity;structural molecule activity	Pf00454, Pf00613, Pf19274	5297	ENSG00000241973	PI4KA	hsa:5297; P42356; Q7Z625; Q9UPG2	Synthesis of PIPs at the Golgi membrane; Synthesis of PIPs at the ER membrane	Ectoderm differentiation; 22q11.2 copy number variation syndrome	4	0	100	100	100	0.22	0.847	3.855	6.64	6.64	6.64	-2.19	-0.24	1.95	1e-17	1e-17	1e-17	0.0404598	0.742527	0.0283797	2.25143e-17	2.43314e-17	2.35969e-17	0.238307
FALSE	High	Master Protein	O43464	Serine protease HTRA2, mitochondrial [OS=Homo sapiens]	0	16.507	11	2	13	2	458	48.8	10.07	34.96	2	cell growth;cell organization and biogenesis;cellular homeostasis;coagulation;defense response;development;metabolic process	cytoplasm;cytoskeleton;cytosol;endoplasmic reticulum;endosome;extracellular;membrane;nucleus	structural molecule activity	Pf02163, Pf13365, Pf17820	27429	ENSG00000115317	HTRA2	hsa:27429; O43464; Q9HBZ4; Q9P0Y3; Q9P0Y4		Apoptosis modulation and signaling; Parkinson's disease pathway; Nanomaterial induced apoptosis; Ciliary landscape; Complement system in neuronal development and plasticity	5	0	100	100	100	0.379	0.592	1.561	6.64	6.64	6.64	-1.4	-0.76	0.64	1e-17	1e-17	1e-17	0.187621	0.146118	0.614949	2.25143e-17	2.43314e-17	2.35969e-17	0.639163
FALSE	High	Master Protein	P51649	Succinate-semialdehyde dehydrogenase, mitochondrial [OS=Homo sapiens]	0	17.162	15	4	14	4	535	57.2	8.28	22.41	4	cellular homeostasis;defense response	endosome	structural molecule activity	Pf00171	7915	ENSG00000112294	ALDH5A1	B2RD26; G5E949; hsa:7915; P51649; Q546H9; Q8N3W6	Degradation of GABA	Fragile X syndrome	2	0	100	100	100	0.611	0.683	1.118	6.64	6.64	6.64	-0.71	-0.55	0.16	1e-17	1e-17	1e-17	0.552554	0.245376	0.831177	2.25143e-17	2.43314e-17	2.35969e-17	0.932719
FALSE	High	Master Protein	Q9P2M7	Cingulin [OS=Homo sapiens]	0	6.118	2	2	9	2	1197	136.3	5.54	15.87	2		cytoplasm;cytoskeleton;endoplasmic reticulum;nucleus	motor activity	Pf01576	57530	ENSG00000143375	CGN	A6H8L3; A7MD22; hsa:57530; Q5T386; Q9NR25; Q9P2M7	TGF-beta receptor signaling in EMT (epithelial to mesenchymal transition)		1	0	100	100	100	0.429	0.557	1.299	6.64	6.64	6.64	-1.22	-0.84	0.38	1e-17	1e-17	1e-17	0.226312	0.0808419	0.942015	2.25143e-17	2.43314e-17	2.35969e-17	0.687525
FALSE	High	Master Protein	O15084	Serine/threonine-protein phosphatase 6 regulatory ankyrin repeat subunit A [OS=Homo sapiens]	0	7.881	3	2	9	2	1053	112.9	6.25	20.44	2		cytosol;membrane		Pf00023, Pf13637	23243	ENSG00000206560	ANKRD28	B4DES5; hsa:23243; O15084; Q1WWL4; Q29RW6; Q3B857; Q6ULS0; Q6ZT57	Telomere Extension By Telomerase; COPII-mediated vesicle transport		2	0	100	100	100	0.271	0.851	3.142	6.64	6.64	6.64	-1.88	-0.23	1.65	1e-17	1e-17	1e-17	0.0556267	0.696767	0.0850569	2.25143e-17	2.43314e-17	2.35969e-17	0.300969
FALSE	High	Master Protein	P08236	Beta-glucuronidase [OS=Homo sapiens]	0	5.789	5	2	2	2	651	74.7	7.02	5.19	2	cellular homeostasis	cell surface;mitochondrion;nucleus	antioxidant activity;structural molecule activity	Pf00703, Pf02836, Pf02837	2990	ENSG00000169919	GUSB	B4E1F6; E9PCV0; hsa:2990; P08236; Q549U0; Q96CL9	Neutrophil degranulation; HS-GAG degradation; Hyaluronan uptake and degradation; MPS VII - Sly syndrome	Glycosaminoglycan degradation	5	0	100	100	100	1.05	0.891	0.849	6.64	6.64	6.64	0.07	-0.17	-0.24	1e-17	1e-17	1e-17	0.518756	0.779809	0.37928	2.25143e-17	2.43314e-17	2.35969e-17	0.919947
FALSE	High	Master Protein	Q8N392	Rho GTPase-activating protein 18 [OS=Homo sapiens]	0	13.345	8	4	11	4	663	74.9	6.44	12.5	4	cell growth;development;metabolic process	cytoplasm;cytoskeleton;cytosol;endoplasmic reticulum;membrane;nucleus	DNA binding	Pf00620	93663	ENSG00000146376	ARHGAP18	E1P575; hsa:93663; Q58EZ3; Q6P679; Q6PJD7; Q8N392; Q96S64	RHOC GTPase cycle; RHOA GTPase cycle		2	0	100	100	100	0.818	1.378	1.684	6.64	6.64	6.64	-0.29	0.46	0.75	1e-17	1e-17	1e-17	0.924309	0.226169	0.352527	2.25143e-17	2.43314e-17	2.35969e-17	0.992849
FALSE	High	Master Protein	Q12846	Syntaxin-4 [OS=Homo sapiens]	0	7.693	16	2	6	2	297	34.2	6.28	11.49	2	cell death;cell growth;coagulation;conjugation;metabolic process	cell surface;cytoplasm;cytoskeleton;cytosol;extracellular;mitochondrion;nucleus	DNA binding;structural molecule activity	Pf00804, Pf05739	6810	ENSG00000103496	STX4	A8MXY0; hsa:6810; Q12846; Q15525; Q6FHE8	ER-Phagosome pathway; Translocation of SLC2A4 (GLUT4) to the plasma membrane; trans-Golgi Network Vesicle Budding; Disinhibition of SNARE formation; Other interleukin signaling	Insulin signaling	6	0	100	100	100	1.668	0.981	0.588	6.64	6.64	6.64	0.74	-0.03	-0.77	1e-17	1e-17	1e-17	0.109975	0.979194	0.067038	2.25143e-17	2.43314e-17	2.35969e-17	0.465189
FALSE	Medium	Master Protein	Q9BYN8	28S ribosomal protein S26, mitochondrial [OS=Homo sapiens]	0.03	1.815	9	1	1	1	205	24.2	10.39	0	1		cytoskeleton;endosome;Golgi;membrane		Pf14943	64949	ENSG00000125901	MRPS26	hsa:64949; Q96Q58; Q9BYN8	Mitochondrial translation initiation; Mitochondrial translation elongation; Mitochondrial translation termination		3	0	100	100	100	0.584	0.964	1.651	6.64	6.64	6.64	-0.78	-0.05	0.72	1e-17	1e-17	1e-17	0.751893	0.995723	0.676378	2.25143e-17	2.43314e-17	2.35969e-17	0.981654
FALSE	High	Master Protein	Q99990	Transcription cofactor vestigial-like protein 1 [OS=Homo sapiens]	0	16.696	38	5	9	5	258	28.7	9.17	19.89	5	metabolic process	membrane	structural molecule activity	Pf07545	51442	ENSG00000102243	VGLL1	hsa:51442; Q5H915; Q99990			0	0	100	100	100	0.092	0.514	5.561	6.64	6.64	6.64	-3.44	-0.96	2.48	1e-17	1e-17	1e-17	7.21203e-08	0.0214644	4.78875e-05	2.25143e-17	2.43314e-17	2.35969e-17	8.47218e-07
FALSE	Medium	Master Protein	Q9NV70	Exocyst complex component 1 [OS=Homo sapiens]	0.01	2.445	2	1	5	1	894	101.9	6.61	7.15	1	coagulation;conjugation;development;metabolic process	cytoplasm;cytoskeleton;cytosol;nucleus	structural molecule activity	Pf09763, Pf15277	55763	ENSG00000090989	EXOC1	hsa:55763; Q504V4; Q8WUE7; Q96T15; Q9NV70; Q9NZE4	Translocation of SLC2A4 (GLUT4) to the plasma membrane; Insulin processing; VxPx cargo-targeting to cilium	Ciliary landscape	4	0	100	100	100	0.78	0.837	1.073	6.64	6.64	6.64	-0.36	-0.26	0.1	1e-17	1e-17	1e-17	0.93288	0.670291	0.752391	2.25143e-17	2.43314e-17	2.35969e-17	0.993685
FALSE	High	Master Protein	Q9Y6V7	Probable ATP-dependent RNA helicase DDX49 [OS=Homo sapiens]	0.005	2.916	6	1	2	1	483	54.2	9.06	0	1	cellular component movement;cellular homeostasis;metabolic process	membrane	structural molecule activity	Pf00270, Pf00271	54555	ENSG00000105671	DDX49	E7ENA0; hsa:54555; Q53FJ1; Q9BVQ8; Q9Y6V7	Major pathway of rRNA processing in the nucleolus and cytosol; rRNA modification in the nucleus and cytosol		2	0	100		100	0.01	1.052	100	6.64		6.64	-6.64	0.07	6.64	1e-17		1e-17	1e-17	0.761532	1e-17	2.25143e-17		2.35969e-17	1.33839e-16
FALSE	High	Master Protein	Q14004	Cyclin-dependent kinase 13 [OS=Homo sapiens]	0	9.754	2	2	11	1	1512	164.8	9.69	21.25	2	cell organization and biogenesis;cellular component movement;cellular homeostasis;defense response;metabolic process	cell surface;cytosol;extracellular;membrane;nucleus	signal transducer activity;structural molecule activity	Pf00069	8621	ENSG00000065883	CDK13	hsa:8621; Q14004; Q53G78; Q6DKQ9; Q75MH4; Q75MH5; Q96JN4; Q9H4A0; Q9H4A1; Q9UDR4	Neutrophil degranulation; TP53 Regulates Transcription of DNA Repair Genes		2	0	100	100	100	0.457	0.809	1.769	6.64	6.64	6.64	-1.13	-0.31	0.82	1e-17	1e-17	1e-17	0.462575	0.597175	0.547764	2.25143e-17	2.43314e-17	2.35969e-17	0.893129
FALSE	High	Master Protein	P27986	Phosphatidylinositol 3-kinase regulatory subunit alpha [OS=Homo sapiens]	0	5.988	6	2	5	2	724	83.5	6.16	4.46	2	cell communication;cell organization and biogenesis;cellular homeostasis;coagulation;conjugation;defense response;development;metabolic process	cytoplasm;cytoskeleton;cytosol;extracellular;membrane;nucleus	antioxidant activity;DNA binding;structural molecule activity	Pf00017, Pf00620, Pf16454	5295	ENSG00000145675	PIK3R1	B3KT19; D3DWA0; E7EX19; hsa:5295; P27986; Q15747; Q4VBZ7; Q53EM6; Q8IXA2; Q8N1C5	Downstream TCR signaling; Antigen activates B Cell Receptor (BCR) leading to generation of second messengers; PIP3 activates AKT signaling; Synthesis of PIPs at the plasma membrane; Constitutive Signaling by Aberrant PI3K in Cancer; PI5P, PP2A and IER3 Regulate PI3K/AKT Signaling; RET signaling; Erythropoietin activates Phosphoinositide-3-kinase (PI3K); Interleukin receptor SHC signaling; Regulat…	IL-5 signaling pathway; Androgen receptor signaling pathway; AMP-activated protein kinase (AMPK) signaling; MicroRNAs in cardiomyocyte hypertrophy; IL-1 signaling pathway; RANKL/RANK signaling pathway; Thyroid stimulating hormone (TSH) signaling pathway; Leptin signaling pathway; Prolactin signaling pathway; IL-7 signaling pathway; Alzheimer's disease and miRNA effects; IL-9 signaling pathway; Gl…	145	0	100	100	100	0.597	0.838	1.403	6.64	6.64	6.64	-0.74	-0.26	0.49	1e-17	1e-17	1e-17	0.763138	0.748682	0.892978	2.25143e-17	2.43314e-17	2.35969e-17	0.982432
FALSE	High	Master Protein	Q9ULC3	Ras-related protein Rab-23 [OS=Homo sapiens]	0.003	3.172	7	1	1	1	237	26.6	6.6	3	1	cell growth;cellular homeostasis;coagulation;conjugation;defense response;metabolic process	cytoplasm;cytoskeleton;cytosol;endoplasmic reticulum;mitochondrion;nucleus	structural molecule activity	Pf00071	51715	ENSG00000112210	RAB23	B2R9I5; hsa:51715; Q68DJ6; Q8NI06; Q9P023; Q9ULC3	RAB geranylgeranylation	Genes related to primary cilium development (based on CRISPR); Ciliopathies	3	0	100	100	100	0.745	0.667	0.896	6.64	6.64	6.64	-0.43	-0.58	-0.16	1e-17	1e-17	1e-17	0.904519	0.30852	0.41933	2.25143e-17	2.43314e-17	2.35969e-17	0.992849
FALSE	High	Master Protein	P48449	Lanosterol synthase [OS=Homo sapiens]	0	18.64	7	4	17	4	732	83.3	6.61	33.1	4	cellular homeostasis;metabolic process	cytoskeleton;extracellular;nucleus	structural molecule activity	Pf00432	4047	ENSG00000160285	LSS	B4DJZ9; D3DSN0; E9PEI9; G5E9Q9; hsa:4047; P48449; Q8IYL6; Q9UEZ1	Activation of gene expression by SREBF (SREBP); Cholesterol biosynthesis	Cholesterol biosynthesis pathway; Sterol regulatory element-binding proteins (SREBP) signaling; Cholesterol metabolism with Bloch and Kandutsch-Russell pathways	5	0	100	100	100	1.55	0.761	0.491	6.64	6.64	6.64	0.63	-0.39	-1.03	1e-17	1e-17	1e-17	0.145128	0.453099	0.0365148	2.25143e-17	2.43314e-17	2.35969e-17	0.560112
FALSE	Medium	Master Protein	Q96RL7	Vacuolar protein sorting-associated protein 13A [OS=Homo sapiens]	0.049	1.614	0	1	1	1	3174	360	6.33	0	1	cell growth;cell organization and biogenesis;cellular homeostasis;conjugation;defense response;metabolic process	cytoskeleton;cytosol;endoplasmic reticulum;endosome;extracellular;mitochondrion;nucleus		Pf06650, Pf09333, Pf12624, Pf16908, Pf16909, Pf16910	23230	ENSG00000197969	VPS13A	hsa:23230; Q5JSX9; Q5JSY0; Q5VYR5; Q702P4; Q709D0; Q86YF8; Q96RL7; Q96S61; Q9H995; Q9Y2J1			0	0	100	100	100	1.448	1.33	0.918	6.64	6.64	6.64	0.53	0.41	-0.12	1e-17	1e-17	1e-17	0.186206	0.32623	0.529808	2.25143e-17	2.43314e-17	2.35969e-17	0.639163
FALSE	High	Master Protein	P35080	Profilin-2 [OS=Homo sapiens]	0	13.306	38	3	12	3	140	15	6.99	35.55	3	cell growth;metabolic process	endoplasmic reticulum;nucleus	motor activity;structural molecule activity	Pf00235	5217	ENSG00000070087	PFN2	B2R4C8; D3DNI4; hsa:5217; P35080; Q4VBQ4; Q8WVF9; Q9HBK2	RHO GTPases Activate Formins; Signaling by ROBO receptors	Physico-chemical features and toxicity-associated pathways	3	0	100	100	100	1.573	1.731	1.1	6.64	6.64	6.64	0.65	0.79	0.14	1e-17	1e-17	1e-17	0.141794	0.0370117	0.970443	2.25143e-17	2.43314e-17	2.35969e-17	0.553192
FALSE	High	Master Protein	Q8TAP9	M-phase-specific PLK1-interacting protein [OS=Homo sapiens]	0	5.634	14	1	7	1	179	19.1	10.23	13.41	1	cell differentiation;metabolic process	endoplasmic reticulum;extracellular;membrane;nucleus		Pf15502	136647	ENSG00000168303	MPLKIP	hsa:136647; Q8TAP9			0	0	100	100	100	1.282	1.308	1.021	6.64	6.64	6.64	0.36	0.39	0.03	1e-17	1e-17	1e-17	0.274724	0.339238	0.698967	2.25143e-17	2.43314e-17	2.35969e-17	0.751654
FALSE	High	Master Protein	Q8TE68	Epidermal growth factor receptor kinase substrate 8-like protein 1 [OS=Homo sapiens]	0	19.263	14	6	22	6	723	80.2	6.04	29.83	6	development;metabolic process	cytoplasm;cytoskeleton;cytosol;nucleus	antioxidant activity;motor activity	Pf00018, Pf08416, Pf18016	54869	ENSG00000131037	EPS8L1	hsa:54869; Q71RE2; Q8NC10; Q8TE68; Q96BB7; Q9BSQ2; Q9GZQ2; Q9NXH0		Fragile X syndrome	1	0	100	100	100	0.235	1.598	6.812	6.64	6.64	6.64	-2.09	0.68	2.77	1e-17	1e-17	1e-17	0.0149569	0.0838112	1.21503e-05	2.25143e-17	2.43314e-17	2.35969e-17	0.105998
FALSE	High	Master Protein	Q9UDX3	SEC14-like protein 4 [OS=Homo sapiens]	0	5.454	9	2	4	2	406	46.6	6.57	4.87	2			structural molecule activity	Pf00650	284904	ENSG00000133488	SEC14L4	A5D6W7; A6NCV4; hsa:284904; Q9UDX3			0	0	100	100	100	0.925	0.661	0.715	6.64	6.64	6.64	-0.11	-0.6	-0.48	1e-17	1e-17	1e-17	0.688319	0.316147	0.25781	2.25143e-17	2.43314e-17	2.35969e-17	0.971932
FALSE	High	Master Protein	O95487	Protein transport protein Sec24B [OS=Homo sapiens]	0	17.902	7	4	23	3	1268	137.3	6.67	34.38	4	cell growth;conjugation;defense response;metabolic process	cytoskeleton;cytosol;extracellular	structural molecule activity	Pf00626, Pf04810, Pf04811, Pf04815, Pf08033	10427	ENSG00000138802	SEC24B	B7ZKM8; B7ZKN4; hsa:10427; O95487; Q0VG08	MHC class II antigen presentation; COPII-mediated vesicle transport; Cargo concentration in the ER; Regulation of cholesterol biosynthesis by SREBP (SREBF); Antigen Presentation: Folding, assembly and peptide loading of class I MHC	Sterol regulatory element-binding proteins (SREBP) signaling	6	0	100	100	100	0.668	0.483	0.723	6.64	6.64	6.64	-0.58	-1.05	-0.47	1e-17	1e-17	1e-17	0.822297	0.0424638	0.27319	2.25143e-17	2.43314e-17	2.35969e-17	0.985798
FALSE	Medium	Master Protein	O95999	B-cell lymphoma/leukemia 10 [OS=Homo sapiens]	0.024	1.965	5	1	6	1	233	26.2	5.74	4.53	1	cell growth;coagulation;defense response;development;metabolic process	cytoplasm;cytoskeleton;cytosol;endoplasmic reticulum;membrane;mitochondrion;nucleus	structural molecule activity	Pf00619	8915	ENSG00000142867	BCL10	hsa:8915; O95999; Q5VUF1	FCERI mediated NF-kB activation; Downstream TCR signaling; Activation of NF-kappaB in B cells; CLEC7A (Dectin-1) signaling; E3 ubiquitin ligases ubiquitinate target proteins	B cell receptor signaling pathway; T-cell antigen receptor (TCR) pathway during Staphylococcus aureus infection; Modulators of TCR signaling and T cell activation; T-cell receptor signaling pathway	9	0	100	100	100	0.843	1.244	1.474	6.64	6.64	6.64	-0.25	0.31	0.56	1e-17	1e-17	1e-17	0.746175	0.427382	0.808381	2.25143e-17	2.43314e-17	2.35969e-17	0.981654
FALSE	High	Master Protein	Q9P0K7	Ankycorbin [OS=Homo sapiens]	0.001	4.061	1	1	4	1	980	110	6.21	4.99	1	metabolic process	cytosol;endoplasmic reticulum;membrane;nucleus	motor activity	Pf00023, Pf12796	26064	ENSG00000039560	RAI14	E9PED3; hsa:26064; Q6V1W9; Q7Z5I4; Q7Z733; Q9P0K7; Q9P2L2; Q9Y3T5			0	0	100	100	100	0.93	1.175	1.263	6.64	6.64	6.64	-0.1	0.23	0.34	1e-17	1e-17	1e-17	0.62506	0.533126	0.872008	2.25143e-17	2.43314e-17	2.35969e-17	0.959632
FALSE	High	Master Protein	Q8N5M1	ATP synthase mitochondrial F1 complex assembly factor 2 [OS=Homo sapiens]	0.001	3.982	9	1	3	1	289	32.8	7.09	5.75	1	cell growth	cytosol;endosome;membrane		Pf07542	91647	ENSG00000171953	ATPAF2	A6NDE5; A8K2J2; hsa:91647; Q6XYC7; Q8N5M1		7q11.23 copy number variation syndrome	1	0	100	100	100	0.813	1.1	1.353	6.64	6.64	6.64	-0.3	0.14	0.44	1e-17	1e-17	1e-17	0.793645	0.675549	0.995072	2.25143e-17	2.43314e-17	2.35969e-17	0.985495
FALSE	High	Master Protein	O00399	Dynactin subunit 6 [OS=Homo sapiens]	0	8.556	15	2	9	2	190	20.7	6.32	21.71	2	cell differentiation;cell growth	cytosol;endoplasmic reticulum;nucleus	structural molecule activity		10671	ENSG00000104671	DCTN6	B2RAC1; hsa:10671; O00399	MHC class II antigen presentation; HSP90 chaperone cycle for steroid hormone receptors (SHR) in the presence of ligand; COPI-mediated anterograde transport; COPI-independent Golgi-to-ER retrograde traffic		4	0	100	100	100	0.866	1.04	1.202	6.64	6.64	6.64	-0.21	0.06	0.27	1e-17	1e-17	1e-17	0.840736	0.794156	0.954851	2.25143e-17	2.43314e-17	2.35969e-17	0.985798
FALSE	High	Master Protein	Q86YH6	All trans-polyprenyl-diphosphate synthase PDSS2 [OS=Homo sapiens]	0	6.299	14	3	3	3	399	44.1	8.24	4.05	3	cellular homeostasis;defense response;metabolic process	cytosol;endosome;nucleus	structural molecule activity	Pf00348	57107	ENSG00000164494	PDSS2	hsa:57107; Q33DR4; Q4G158; Q5VU38; Q5VU39; Q86YH6; Q9NR58	Ubiquinol biosynthesis	Nephrotic syndrome	2	0	100	100	100	0.333	0.689	2.067	6.64	6.64	6.64	-1.59	-0.54	1.05	1e-17	1e-17	1e-17	0.169655	0.364314	0.372205	2.25143e-17	2.43314e-17	2.35969e-17	0.610251
FALSE	Medium	Master Protein	Q9H4M9	EH domain-containing protein 1 [OS=Homo sapiens]	0.043	1.69	4	1	2	1	534	60.6	6.83	2.66	1	cell growth;conjugation;defense response;metabolic process	cytoplasm;cytoskeleton;mitochondrion;nucleus	structural molecule activity	Pf00350, Pf12763, Pf16880, Pf18150	10938	ENSG00000110047	EHD1	hsa:10938; O14611; Q2M3Q4; Q9H4M9; Q9UNR3	Factors involved in megakaryocyte development and platelet production	Insulin signaling	2	0	100	100	100	0.946	1.017	1.075	6.64	6.64	6.64	-0.08	0.02	0.1	1e-17	1e-17	1e-17	0.660802	0.876067	0.754454	2.25143e-17	2.43314e-17	2.35969e-17	0.966783
FALSE	High	Master Protein	Q4KMP7	TBC1 domain family member 10B [OS=Homo sapiens]	0.001	3.809	3	1	4	1	808	87.1	9.19	4.92	1	conjugation;metabolic process	cytoplasm;cytoskeleton;cytosol	DNA binding	Pf00566	26000	ENSG00000169221	TBC1D10B	B9A6L0; hsa:26000; Q4KMP7; Q6IN54; Q6P530; Q71RG7; Q86VC5; Q9H8Z2; Q9NUN6; Q9UFP2	TBC/RABGAPs		1	0	100	100	100	1.104	0.916	0.83	6.64	6.64	6.64	0.14	-0.13	-0.27	1e-17	1e-17	1e-17	0.408626	0.93411	0.368616	2.25143e-17	2.43314e-17	2.35969e-17	0.865139
FALSE	High	Master Protein	P32519	ETS-related transcription factor Elf-1 [OS=Homo sapiens]	0.001	4.282	8	2	4	2	619	67.5	5.21	9.59	2	metabolic process	membrane;nucleus	RNA binding;structural molecule activity	Pf00178, Pf12310	1997	ENSG00000120690	ELF1	B4E2I5; E9PDQ9; hsa:1997; P32519; Q8N6F6; Q9UDE1	RUNX1 regulates transcription of genes involved in interleukin signaling; RUNX1 regulates transcription of genes involved in BCR signaling		2	0	100	100	100	0.921	1.082	1.175	6.64	6.64	6.64	-0.12	0.11	0.23	1e-17	1e-17	1e-17	0.688819	0.791427	0.88398	2.25143e-17	2.43314e-17	2.35969e-17	0.971932
FALSE	Medium	Master Protein	Q9Y6I9	Testis-expressed protein 264 [OS=Homo sapiens]	0.014	2.253	4	1	1	1	313	34.2	4.86	0	1	cell growth;cell proliferation;cellular homeostasis;coagulation	cell surface;cytoskeleton;cytosol;extracellular;membrane;mitochondrion;nucleus	structural molecule activity		51368	ENSG00000164081	TEX264	B3KN87; hsa:51368; Q9UKD7; Q9Y6I9	Platelet degranulation		1	0	100			0.01	0.01		6.64			-6.64	-6.64		1e-17			1e-17	1e-17		2.25143e-17			1.33839e-16
FALSE	High	Master Protein	Q9H9P8	L-2-hydroxyglutarate dehydrogenase, mitochondrial [OS=Homo sapiens]	0	13.964	16	4	15	4	463	50.3	8.15	16.35	4	cell organization and biogenesis;cellular homeostasis	cytoskeleton;endosome	structural molecule activity	Pf01266	79944	ENSG00000087299	L2HGDH	hsa:79944; Q9BRR1; Q9H9P8	Interconversion of 2-oxoglutarate and 2-hydroxyglutarate	Cerebral organic acidurias, including diseases	2	0	100	100	100	0.586	0.754	1.288	6.64	6.64	6.64	-0.77	-0.41	0.37	1e-17	1e-17	1e-17	0.582387	0.413581	0.993018	2.25143e-17	2.43314e-17	2.35969e-17	0.941225
FALSE	High	Master Protein	Q6UN15	Pre-mRNA 3'-end-processing factor FIP1 [OS=Homo sapiens]	0	21.424	24	7	16	7	594	66.5	5.59	26.43	7	cellular component movement;cellular homeostasis	cytosol;membrane		Pf05182	81608	ENSG00000145216	FIP1L1	B4DIR3; G3XAD6; hsa:81608; Q0VGE0; Q499Y4; Q49AU3; Q6UN15; Q7Z608; Q8WVN3; Q96F80; Q9H077	mRNA Splicing - Major Pathway; Transport of Mature mRNA Derived from an Intronless Transcript; mRNA 3'-end processing; RNA Polymerase II Transcription Termination; Processing of Intronless Pre-mRNAs; Signaling by cytosolic PDGFRA and PDGFRB fusion proteins		6	0	100	100	100	0.644	0.774	1.202	6.64	6.64	6.64	-0.64	-0.37	0.27	1e-17	1e-17	1e-17	0.495436	0.411457	0.89399	2.25143e-17	2.43314e-17	2.35969e-17	0.904741
FALSE	High	Master Protein	O75431	Metaxin-2 [OS=Homo sapiens]	0	9.218	19	2	9	2	263	29.7	6.29	11.85	2	cell growth;conjugation	cytoskeleton;endosome;membrane;nucleus		Pf10568, Pf17171	10651	ENSG00000128654	MTX2	A8JZZ4; hsa:10651; O75431; Q53S50; Q53SQ2; Q5M7Z6; Q8IZ68	Mitochondrial protein import; Cristae formation		2	0	100	100	100	0.427	0.702	1.644	6.64	6.64	6.64	-1.23	-0.51	0.72	1e-17	1e-17	1e-17	0.280277	0.352813	0.582385	2.25143e-17	2.43314e-17	2.35969e-17	0.755856
FALSE	High	Master Protein	Q15436	Protein transport protein Sec23A [OS=Homo sapiens]	0	15.364	7	3	13	2	765	86.1	7.08	12.37	3	cell growth;conjugation;metabolic process	cytoskeleton;cytosol;extracellular;nucleus	DNA binding;structural molecule activity	Pf00626, Pf04810, Pf04811, Pf04815, Pf08033	10484	ENSG00000100934	SEC23A	B2R5P4; B3KXI2; hsa:10484; Q15436; Q8NE16	MHC class II antigen presentation; COPII-mediated vesicle transport; Cargo concentration in the ER; Regulation of cholesterol biosynthesis by SREBP (SREBF); Antigen Presentation: Folding, assembly and peptide loading of class I MHC	Sterol regulatory element-binding proteins (SREBP) signaling	6	0	100	100	100	0.55	0.687	1.249	6.64	6.64	6.64	-0.86	-0.54	0.32	1e-17	1e-17	1e-17	0.65345	0.37195	0.902726	2.25143e-17	2.43314e-17	2.35969e-17	0.966783
FALSE	Medium	Master Protein	Q53HC9	EARP and GARP complex-interacting protein 1 [OS=Homo sapiens]	0.024	1.941	4	1	4	1	387	43.6	5.06	5.8	1	cell organization and biogenesis;cellular homeostasis;conjugation;metabolic process	extracellular		Pf00400	7260	ENSG00000032389	EIPR1	D6W4Y1; hsa:7260; O43179; Q53HC9; Q53S19; Q53SG2		Ciliary landscape	1	0	100	100	100	0.689	1.061	1.541	6.64	6.64	6.64	-0.54	0.09	0.62	1e-17	1e-17	1e-17	0.978048	0.768961	0.761061	2.25143e-17	2.43314e-17	2.35969e-17	0.997943
FALSE	High	Master Protein	P57740	Nuclear pore complex protein Nup107 [OS=Homo sapiens]	0	65.77	28	15	59	15	925	106.3	5.43	99.68	15	cell growth;cellular homeostasis;conjugation;defense response;metabolic process	cytoskeleton;cytosol;membrane;nucleus	structural molecule activity	Pf04121	57122	ENSG00000111581	NUP107	B4DZ67; hsa:57122; P57740; Q6PJE1	Separation of Sister Chromatids; Resolution of Sister Chromatid Cohesion; RHO GTPases Activate Formins; EML4 and NUDC in mitotic spindle formation; Amplification of signal from unattached kinetochores via a MAD2 inhibitory signal; Rev-mediated nuclear export of HIV RNA; NEP/NS2 Interacts with the Cellular Export Machinery; ISG15 antiviral mechanism; NS1 Mediated Effects on Host Pathways; Transcri…	Gastric cancer network 1	35	0	100	100	100	0.906	1.308	1.443	6.64	6.64	6.64	-0.14	0.39	0.53	1e-17	1e-17	1e-17	0.922641	0.201121	0.425212	2.25143e-17	2.43314e-17	2.35969e-17	0.992849
FALSE	High	Master Protein	Q9Y3C4	EKC/KEOPS complex subunit TPRKB [OS=Homo sapiens]	0	11.897	30	3	17	3	175	19.6	6.79	16.33	3	cell growth;cell proliferation;cellular component movement;cellular homeostasis	cytosol;membrane;nucleus	structural molecule activity	Pf08617	51002	ENSG00000144034	TPRKB	D6W5H6; hsa:51002; Q8IWR6; Q8IWR7; Q9H3K4; Q9Y3C4	tRNA modification in the nucleus and cytosol		1	0	100	100	100	1.148	1.256	1.094	6.64	6.64	6.64	0.2	0.33	0.13	1e-17	1e-17	1e-17	0.401013	0.475909	0.748237	2.25143e-17	2.43314e-17	2.35969e-17	0.863052
FALSE	High	Master Protein	Q9Y237	Peptidyl-prolyl cis-trans isomerase NIMA-interacting 4 [OS=Homo sapiens]	0	7.995	34	2	10	2	131	13.8	9.77	17.84	2	cell organization and biogenesis;cellular component movement;cellular homeostasis	endoplasmic reticulum;endosome;membrane;nucleus	RNA binding;structural molecule activity	Pf13616	5303	ENSG00000102309	PIN4	A8E0G6; B3KXM0; F5H1P5; hsa:5303; Q0D2H3; Q3MHV0; Q52M21; Q5HYW6; Q6IRW4; Q9Y237			0	0	100	100	100	0.959	1.243	1.296	6.64	6.64	6.64	-0.06	0.31	0.37	1e-17	1e-17	1e-17	0.703652	0.361791	0.798652	2.25143e-17	2.43314e-17	2.35969e-17	0.97309
FALSE	High	Master Protein	Q9Y2Q9	28S ribosomal protein S28, mitochondrial [OS=Homo sapiens]	0	7.372	14	2	5	2	187	20.8	9.1	12.07	2	cell organization and biogenesis;cellular homeostasis	cytoskeleton;endosome;Golgi		Pf10246	28957	ENSG00000147586	MRPS28	B2RDZ7; hsa:28957; Q96Q21; Q9Y2Q9	Mitochondrial translation initiation; Mitochondrial translation elongation; Mitochondrial translation termination		3	0	100	100	100	0.615	1.561	2.54	6.64	6.64	6.64	-0.7	0.64	1.34	1e-17	1e-17	1e-17	0.819068	0.140103	0.127992	2.25143e-17	2.43314e-17	2.35969e-17	0.985798
FALSE	High	Master Protein	Q15477	Helicase SKI2W [OS=Homo sapiens]	0	10.485	9	5	8	5	1246	137.7	6.06	8.91	5	cellular component movement;cellular homeostasis	cytosol;membrane;nucleus	RNA binding;structural molecule activity	Pf00270, Pf00271, Pf08148, Pf13234, Pf17911	6499	ENSG00000204351; ENSG00000206353; ENSG00000223493; ENSG00000225737; ENSG00000228896; ENSG00000232616	SKIV2L	hsa:6499; O15005; Q12902; Q15476; Q15477; Q5ST66	Association of TriC/CCT with target proteins during biosynthesis; mRNA decay by 3' to 5' exoribonuclease		2	0	100	100	100	0.94	0.855	0.909	6.64	6.64	6.64	-0.09	-0.23	-0.14	1e-17	1e-17	1e-17	0.674627	0.683302	0.41675	2.25143e-17	2.43314e-17	2.35969e-17	0.969599
FALSE	Medium	Master Protein	Q6P4Q7	Metal transporter CNNM4 [OS=Homo sapiens]	0.014	2.263	3	1	1	1	775	86.6	6.07	2.55	1	conjugation;defense response;metabolic process	cytoplasm;cytoskeleton;nucleus	catalytic activity	Pf00571, Pf01595	26504	ENSG00000158158	CNNM4	B7Z1U0; C7SQM3; C7SQM4; C7SQM5; hsa:26504; Q53RE5; Q6P4Q7; Q9H9G3; Q9HCI0; Q9NRN1			0	0	100	100	100	2.49	0.874	0.351	6.64	6.64	6.64	1.32	-0.19	-1.51	1e-17	1e-17	1e-17	0.0273589	0.753802	0.00244968	2.25143e-17	2.43314e-17	2.35969e-17	0.172453
FALSE	High	Master Protein	Q14534	Squalene monooxygenase [OS=Homo sapiens]	0	6.923	4	2	5	2	574	63.9	8.63	6.12	2	cell growth;cellular homeostasis;metabolic process	cytoskeleton;extracellular;nucleus	structural molecule activity	Pf08491, Pf13450	6713	ENSG00000104549	SQLE	hsa:6713; Q14534; Q9UEK6; Q9UNR6	Activation of gene expression by SREBF (SREBP); Cholesterol biosynthesis	Cholesterol biosynthesis pathway; Sterol regulatory element-binding proteins (SREBP) signaling; Statin inhibition of cholesterol production; Cholesterol metabolism with Bloch and Kandutsch-Russell pathways	6	0	100	100	100	9.471	3.555	0.375	6.64	6.64	6.64	3.24	1.83	-1.41	1e-17	1e-17	1e-17	1.24853e-08	0.000230074	0.00281889	2.25143e-17	2.43314e-17	2.35969e-17	1.50765e-07
FALSE	Medium	Master Protein	Q8NI77	Kinesin-like protein KIF18A [OS=Homo sapiens]	0.039	1.72	1	1	3	1	898	102.2	8.91	5.45	1	cell differentiation;cell growth;conjugation;defense response;metabolic process	cytoplasm;cytoskeleton;cytosol;endoplasmic reticulum;membrane;nucleus	motor activity;structural molecule activity	Pf00225	81930	ENSG00000121621	KIF18A	hsa:81930; Q4VPE3; Q86VS5; Q8NI77; Q9H0F3	COPI-dependent Golgi-to-ER retrograde traffic; Separation of Sister Chromatids; MHC class II antigen presentation; Resolution of Sister Chromatid Cohesion; RHO GTPases Activate Formins; EML4 and NUDC in mitotic spindle formation; Kinesins; Amplification of signal from unattached kinetochores via a MAD2 inhibitory signal		9	0	0.01	0.038	0.054	8.287	11.898	1.436	-6.64	-4.73	-4.21	3.05	3.57	0.52	1e-17	1.25859e-10	8.74856e-14	1.37321e-07	1e-17	0.460465	2.25143e-17	3.04814e-10	2.061e-13	1.59152e-06
FALSE	High	Master Protein	Q92504	Zinc transporter SLC39A7 [OS=Homo sapiens]	0.001	3.763	6	1	7	1	469	50.1	6.87	12.74	1	conjugation;metabolic process	cytoskeleton;extracellular;membrane	catalytic activity	Pf02535	7922	ENSG00000112473; ENSG00000206288; ENSG00000224399; ENSG00000226614; ENSG00000227402; ENSG00000229802	SLC39A7	B0UXF6; hsa:7922; Q5STP8; Q92504; Q9UIQ0	Zinc influx into cells by the SLC39 gene family	Nuclear receptors meta-pathway; NRF2 pathway; Zinc homeostasis	4	0	100	100	100	0.573	0.977	1.705	6.64	6.64	6.64	-0.8	-0.03	0.77	1e-17	1e-17	1e-17	0.743939	0.903939	0.580401	2.25143e-17	2.43314e-17	2.35969e-17	0.981654
FALSE	High	Master Protein	P19525	Interferon-induced, double-stranded RNA-activated protein kinase [OS=Homo sapiens]	0	20.361	12	5	25	5	551	62.1	8.4	69.05	5	cell organization and biogenesis;cellular homeostasis;coagulation;development;metabolic process	cytosol;Golgi;membrane;nucleus	DNA binding;RNA binding;signal transducer activity;structural molecule activity	Pf00035, Pf00069	5610	ENSG00000055332	EIF2AK2	A8K3P0; D6W584; E9PC80; hsa:5610; P19525; Q52M43; Q7Z6F6; Q9UIR4	ISG15 antiviral mechanism; Inhibition of PKR	Translation factors; Alzheimer's disease and miRNA effects; Ebola virus infection in host; Measles virus infection; Type I interferon induction and signaling during SARS-CoV-2 infection; Host-pathogen interaction of human coronaviruses - interferon induction; Alzheimer's disease; Type II interferon signaling (IFNG)	10	0	100	100	100	0.346	0.755	2.181	6.64	6.64	6.64	-1.53	-0.41	1.12	1e-17	1e-17	1e-17	0.0415874	0.38025	0.108157	2.25143e-17	2.43314e-17	2.35969e-17	0.242949
FALSE	High	Master Protein	Q8N8S7	Protein enabled homolog [OS=Homo sapiens]	0	45.042	23	9	47	9	591	66.5	6.93	112.57	9	cell growth;defense response;metabolic process	cytoplasm;cytoskeleton;cytosol;endoplasmic reticulum;nucleus	motor activity;structural molecule activity	Pf00568, Pf08776	55740	ENSG00000154380	ENAH	D0PQI2; hsa:55740; Q502W5; Q5T5M7; Q5VTQ9; Q5VTR0; Q8N8S7; Q9NVF3; Q9UFB8	Generation of second messenger molecules; Signaling by ROBO receptors	Regulation of actin cytoskeleton	3	0	100	100	100	0.904	0.843	0.932	6.64	6.64	6.64	-0.14	-0.25	-0.1	1e-17	1e-17	1e-17	0.92971	0.51703	0.638411	2.25143e-17	2.43314e-17	2.35969e-17	0.992849
FALSE	High	Master Protein	Q5VT79	Annexin A8-like protein 1 [OS=Homo sapiens]	0	22.217	23	4	8	4	327	36.9	5.78	20	4	cell growth;conjugation;metabolic process	nucleus	structural molecule activity	Pf00191	728113	ENSG00000264230	ANXA8L1	A0A0B4J2D4; B2R939; hsa:728113; Q53FY2; Q5VT78; Q5VT79; Q96H89			0	0	100	100	100	1.287	0.531	0.413	6.64	6.64	6.64	0.36	-0.91	-1.28	1e-17	1e-17	1e-17	0.282749	0.0886843	0.00400991	2.25143e-17	2.43314e-17	2.35969e-17	0.757326
FALSE	High	Master Protein	Q5VV42	Threonylcarbamoyladenosine tRNA methylthiotransferase [OS=Homo sapiens]	0.003	3.233	4	1	5	1	579	65.1	7.46	0	1	cell organization and biogenesis;cellular component movement;cellular homeostasis	cytoskeleton;extracellular	structural molecule activity	Pf00919, Pf01938, Pf04055	54901	ENSG00000145996	CDKAL1	A8K6S0; hsa:54901; Q5VV42; Q6P385; Q6ZR27; Q9NXB3	tRNA modification in the nucleus and cytosol	Vitamin D receptor pathway	2	0	100		100	0.01	1.121	100	6.64		6.64	-6.64	0.16	6.64	1e-17		1e-17	1e-17	0.634358	1e-17	2.25143e-17		2.35969e-17	1.33839e-16
FALSE	Medium	Master Protein	Q9NS00	Glycoprotein-N-acetylgalactosamine 3-beta-galactosyltransferase 1 [OS=Homo sapiens]	0.028	1.85	5	1	1	1	363	42.2	6.64	0	1	cell organization and biogenesis;cellular homeostasis;defense response;metabolic process	cytoskeleton;extracellular	structural molecule activity	Pf02434	56913	ENSG00000106392	C1GALT1	hsa:56913; Q96QH4; Q9BTU1; Q9NS00	O-linked glycosylation of mucins; Defective C1GALT1C1 causes TNPS	Ectoderm differentiation	3	0	100	100	100	0.605	0.567	0.938	6.64	6.64	6.64	-0.73	-0.82	-0.09	1e-17	1e-17	1e-17	0.671637	0.134602	0.575885	2.25143e-17	2.43314e-17	2.35969e-17	0.969048
FALSE	High	Master Protein	Q9UK55	Protein Z-dependent protease inhibitor [OS=Homo sapiens]	0	5.948	2	1	3	1	444	50.7	8.27	8.35	1	coagulation;metabolic process	cell surface;extracellular	DNA binding;structural molecule activity	Pf00079	51156	ENSG00000140093; ENSG00000278767	SERPINA10	A5Z2A5; hsa:51156; Q6UWX9; Q86U20; Q9UK55	Regulation of Insulin-like Growth Factor (IGF) transport and uptake by Insulin-like Growth Factor Binding Proteins (IGFBPs); Post-translational protein phosphorylation	Network map of SARS-CoV-2 signaling pathway	3	0	0.01	0.067	0.052	100	100	0.766	-6.64	-3.89	-4.27	6.64	6.64	-0.38	1e-17	1.16688e-05	3.90124e-06	1e-17	1e-17	0.193079	2.25143e-17	2.68466e-05	8.7129e-06	1.33839e-16
FALSE	High	Master Protein	P36639	7,8-dihydro-8-oxoguanine triphosphatase [OS=Homo sapiens]	0.007	2.709	7	1	2	1	197	22.5	5.27	4.43	1											0	0	100	100	100	1.777	1.588	0.894	6.64	6.64	6.64	0.83	0.67	-0.16	1e-17	1e-17	1e-17	0.0862242	0.138704	0.439975	2.25143e-17	2.43314e-17	2.35969e-17	0.40297
FALSE	High	Master Protein	Q8IWF6	Protein DENND6A [OS=Homo sapiens]	0.001	5.182	3	1	2	1	608	69.5	8.27	2.81	1	metabolic process	cytosol;mitochondrion;nucleus	DNA binding	Pf08616, Pf09794	201627	ENSG00000174839	DENND6A	hsa:201627; Q7Z5T4; Q8IWF6; Q8N235; Q8TEG8	RAB GEFs exchange GTP for GDP on RABs		1	0	100	100	100	0.468	0.969	2.069	6.64	6.64	6.64	-1.09	-0.05	1.05	1e-17	1e-17	1e-17	0.460332	0.98677	0.334921	2.25143e-17	2.43314e-17	2.35969e-17	0.892891
FALSE	High	Master Protein	Q9UJY5	ADP-ribosylation factor-binding protein GGA1 [OS=Homo sapiens]	0	7.673	13	3	4	3	639	70.3	5.29	7.68	3	conjugation;metabolic process	cytoskeleton;cytosol;extracellular;membrane;mitochondrion;nucleus	structural molecule activity	Pf00790, Pf02883, Pf03127, Pf18308	26088	ENSG00000100083	GGA1	A8K3D3; B0QYR7; hsa:26088; Q5R3N1; Q5TG07; Q6IC75; Q86YA9; Q8NCS6; Q9BW94; Q9UG00; Q9UGW0; Q9UGW1; Q9UJY5	Amyloid fiber formation; TBC/RABGAPs		2	0	100	100	100	0.82	0.866	1.056	6.64	6.64	6.64	-0.29	-0.21	0.08	1e-17	1e-17	1e-17	0.854686	0.725049	0.691123	2.25143e-17	2.43314e-17	2.35969e-17	0.985798
FALSE	High	Master Protein	Q5TAQ9	DDB1- and CUL4-associated factor 8 [OS=Homo sapiens]	0.006	2.839	2	1	3	1	597	66.8	5.39	2.36	1	cell organization and biogenesis;cellular homeostasis	cytosol;endosome;membrane;nucleus		Pf00400	50717	ENSG00000132716	DCAF8	D3DVE6; hsa:50717; Q12839; Q4QQI6; Q53F14; Q5TAQ9; Q66K50; Q68CS7; Q96E00	Neddylation		1	0	100	100	100	0.635	0.839	1.32	6.64	6.64	6.64	-0.65	-0.25	0.4	1e-17	1e-17	1e-17	0.878382	0.740834	0.989406	2.25143e-17	2.43314e-17	2.35969e-17	0.986561
FALSE	High	Master Protein	Q9H6R3	Acyl-CoA synthetase short-chain family member 3, mitochondrial [OS=Homo sapiens]	0.001	4.743	7	2	5	2	686	74.7	8.63	5.58	2	cellular homeostasis	endosome;nucleus	structural molecule activity	Pf00501, Pf13193, Pf16177	79611	ENSG00000111058	ACSS3	hsa:79611; Q8NC66; Q9H6R3	Synthesis of Ketone Bodies		1	0	100	100	100	0.605	0.482	0.797	6.64	6.64	6.64	-0.72	-1.05	-0.33	1e-17	1e-17	1e-17	0.661737	0.0519198	0.364601	2.25143e-17	2.43314e-17	2.35969e-17	0.966783
FALSE	High	Master Protein	Q9UI10	Translation initiation factor eIF-2B subunit delta [OS=Homo sapiens]	0	14.503	15	4	23	4	523	57.5	9.38	42.02	4	cell organization and biogenesis;cellular homeostasis;coagulation;defense response;development;metabolic process	cytosol;Golgi;nucleus	RNA binding;structural molecule activity	Pf01008	8890	ENSG00000115211	EIF2B4	hsa:8890; Q53RY7; Q5BJF4; Q9BUV9; Q9UBG4; Q9UI10; Q9UIQ9; Q9UJ95	Recycling of eIF2:GDP	Translation factors	2	0	100	100	100	0.672	0.962	1.431	6.64	6.64	6.64	-0.57	-0.06	0.52	1e-17	1e-17	1e-17	0.77204	0.973987	0.687985	2.25143e-17	2.43314e-17	2.35969e-17	0.983529
FALSE	High	Master Protein	Q8N6L1	Keratinocyte-associated protein 2 [OS=Homo sapiens]	0	6.183	33	2	4	2	136	14.7	9.61	11.38	2	cell organization and biogenesis;cellular homeostasis	cytoskeleton;extracellular	DNA binding	Pf09775	200185	ENSG00000163463	KRTCAP2	B2R4Q1; hsa:200185; Q6PG45; Q86XW2; Q8IWS4; Q8N6L1			0	0	100	100	100	1.691	1.059	0.627	6.64	6.64	6.64	0.76	0.08	-0.67	1e-17	1e-17	1e-17	0.110851	0.79489	0.116674	2.25143e-17	2.43314e-17	2.35969e-17	0.467063
FALSE	High	Master Protein	P08134	Rho-related GTP-binding protein RhoC [OS=Homo sapiens]	0	22.955	30	5	36	1	193	22	6.58	76.28	5	cell differentiation;cell growth;coagulation;development;metabolic process	cytoplasm;cytoskeleton;cytosol;endoplasmic reticulum;extracellular;membrane;nucleus	structural molecule activity	Pf00071	389	ENSG00000155366	RHOC	B3KSW1; hsa:389; P08134; Q6ICN3	RHO GTPases Activate Formins; RHO GTPases activate CIT; RHOC GTPase cycle; G alpha (12/13) signalling events; RHO GTPases Activate Rhotekin and Rhophilins; Sema4D induced cell migration and growth-cone collapse; RHO GTPases activate PKNs; RHO GTPases Activate ROCKs	Spinal cord injury; VEGFA-VEGFR2 signaling pathway; Ebola virus infection in host	11	0	100	100	100	1.13	0.829	0.734	6.64	6.64	6.64	0.18	-0.27	-0.45	1e-17	1e-17	1e-17	0.419981	0.734564	0.281355	2.25143e-17	2.43314e-17	2.35969e-17	0.869508
FALSE	High	Master Protein	Q96GT9	X antigen family member 2 [OS=Homo sapiens]	0.001	4.244	47	2	2	2	111	12.3	5.2	2.05	2				Pf05831	9502	ENSG00000155622	XAGE2	hsa:9502; Q5HYR4; Q96GT9			0	0	100	100	100	2.373	1.558	0.657	6.64	6.64	6.64	1.25	0.64	-0.61	1e-17	1e-17	1e-17	0.0227501	0.162062	0.0774812	2.25143e-17	2.43314e-17	2.35969e-17	0.150842
FALSE	High	Master Protein	Q5HYI8	Rab-like protein 3 [OS=Homo sapiens]	0.001	4.799	18	2	5	2	236	26.4	7.11	8.77	2	conjugation;defense response;metabolic process	nucleus	structural molecule activity	Pf08477	285282	ENSG00000144840	RABL3	hsa:285282; Q5HYI8; Q8WUD3			0	0	100	100	100	0.694	0.985	1.419	6.64	6.64	6.64	-0.53	-0.02	0.5	1e-17	1e-17	1e-17	0.821478	0.970973	0.702628	2.25143e-17	2.43314e-17	2.35969e-17	0.985798
FALSE	High	Master Protein	Q9BST9	Rhotekin [OS=Homo sapiens]	0	5.627	5	1	4	1	563	62.6	7.44	10.71	1	cell differentiation;cell growth;development;metabolic process	cytosol;endoplasmic reticulum	DNA binding;structural molecule activity	Pf00169, Pf08174	6242	ENSG00000114993	RTKN	H7BXD4; hsa:6242; Q8WVN1; Q96PT6; Q9BST9; Q9HB05	RHOC GTPase cycle; RHOA GTPase cycle; RHOB GTPase cycle; RHO GTPases Activate Rhotekin and Rhophilins	G13 signaling pathway	5	0	100	100	100	0.345	0.746	2.162	6.64	6.64	6.64	-1.54	-0.42	1.11	1e-17	1e-17	1e-17	0.223078	0.526445	0.319172	2.25143e-17	2.43314e-17	2.35969e-17	0.682978
FALSE	High	Master Protein	Q9NRR5	Ubiquilin-4 [OS=Homo sapiens]	0	47.944	16	6	54	2	601	63.8	5.22	157.79	6	cell organization and biogenesis;cell proliferation;cellular homeostasis;coagulation;metabolic process	cytoskeleton;cytosol;extracellular;membrane;mitochondrion;nucleus	structural molecule activity	Pf00240, Pf00627	56893	ENSG00000160803	UBQLN4	A6ND44; B2RAY7; hsa:56893; Q5VYA0; Q5VYA1; Q9BR98; Q9NRR5; Q9UHX4			0	0	100	100	100	0.729	0.831	1.14	6.64	6.64	6.64	-0.46	-0.27	0.19	1e-17	1e-17	1e-17	0.916015	0.734613	0.787445	2.25143e-17	2.43314e-17	2.35969e-17	0.992849
FALSE	Medium	Master Protein	Q8IU81	Interferon regulatory factor 2-binding protein 1 [OS=Homo sapiens]	0.013	2.305	4	1	5	1	584	61.6	8.18	0	1	cell organization and biogenesis;cellular homeostasis;metabolic process	membrane	structural molecule activity	Pf00097, Pf11261	26145	ENSG00000170604	IRF2BP1	hsa:26145; Q53EL7; Q6DC95; Q8IU81; Q9BRZ9; Q9Y4P4			0	0	100	100	100	0.466	1.247	2.677	6.64	6.64	6.64	-1.1	0.32	1.42	1e-17	1e-17	1e-17	0.47277	0.444178	0.130729	2.25143e-17	2.43314e-17	2.35969e-17	0.896446
FALSE	High	Master Protein	O94906	Pre-mRNA-processing factor 6 [OS=Homo sapiens]	0	30.836	11	8	25	8	941	106.9	8.25	76.11	8	cell growth;cellular component movement;cellular homeostasis;metabolic process	membrane	RNA binding;structural molecule activity	Pf06424, Pf13181	24148	ENSG00000101161	PRPF6	B2RAR5; B3KMC6; hsa:24148; O94906; O95109; Q5VXS5; Q9H3Z1; Q9H4T9; Q9H4U8; Q9NTE6	mRNA Splicing - Major Pathway; mRNA Splicing - Minor Pathway	mRNA processing	3	0	100	100	100	0.667	0.933	1.398	6.64	6.64	6.64	-0.58	-0.1	0.48	1e-17	1e-17	1e-17	0.426102	0.848629	0.453548	2.25143e-17	2.43314e-17	2.35969e-17	0.8729
FALSE	High	Master Protein	Q9Y679	Lipid droplet-regulating VLDL assembly factor AUP1 [OS=Homo sapiens]	0	7.09	10	2	4	2	410	45.8	8.65	2.2	2	cell growth;cell organization and biogenesis;cellular homeostasis;coagulation;conjugation;metabolic process	cytoskeleton;extracellular;mitochondrion;nucleus	DNA binding;structural molecule activity	Pf02845	550	ENSG00000115307	AUP1	C0H5W8; hsa:550; Q9H866; Q9UNQ6; Q9Y679; Q9Y685			0	0	100	100	100	0.781	0.793	1.015	6.64	6.64	6.64	-0.36	-0.33	0.02	1e-17	1e-17	1e-17	0.905633	0.642357	0.652608	2.25143e-17	2.43314e-17	2.35969e-17	0.992849
FALSE	High	Master Protein	O75503	Ceroid-lipofuscinosis neuronal protein 5 [OS=Homo sapiens]	0.007	2.622	6	1	1	1	358	41.5	7.4	2.91	1	cell growth;cell organization and biogenesis;cellular homeostasis;conjugation;defense response;metabolic process	cytoskeleton;cytosol;extracellular;mitochondrion;nucleus	structural molecule activity	Pf15014	1203	ENSG00000102805	CLN5	B3KQK7; hsa:1203; O75503			0	0	100	100	100	0.233	0.614	2.635	6.64	6.64	6.64	-2.1	-0.7	1.4	1e-17	1e-17	1e-17	0.0566783	0.244097	0.156465	2.25143e-17	2.43314e-17	2.35969e-17	0.304752
FALSE	High	Master Protein	P56962	Syntaxin-17 [OS=Homo sapiens]	0	5.311	9	1	7	1	302	33.4	6.57	5.72	1	cell growth;cellular homeostasis;conjugation	cytoplasm;cytoskeleton;cytosol;endosome;extracellular;mitochondrion;nucleus	structural molecule activity		55014	ENSG00000136874	STX17	hsa:55014; P56962; Q4VXC2	COPII-mediated vesicle transport		1	0	100	100	100	0.681	0.989	1.451	6.64	6.64	6.64	-0.55	-0.02	0.54	1e-17	1e-17	1e-17	0.962362	0.929402	0.880887	2.25143e-17	2.43314e-17	2.35969e-17	0.997943
FALSE	High	Master Protein	Q13242	Serine/arginine-rich splicing factor 9 [OS=Homo sapiens]	0.001	5.044	5	1	8	1	221	25.5	8.65	21.27	1	cell growth;cellular component movement;cellular homeostasis;metabolic process	membrane	structural molecule activity	Pf00076	8683	ENSG00000111786	SRSF9	hsa:8683; Q13242; Q52LD1	mRNA Splicing - Major Pathway; mRNA 3'-end processing; RNA Polymerase II Transcription Termination; Transport of Mature mRNA derived from an Intron-Containing Transcript	mRNA processing	5	0	100	100	100	1.846	1.009	0.547	6.64	6.64	6.64	0.88	0.01	-0.87	1e-17	1e-17	1e-17	0.0733428	0.925698	0.0415677	2.25143e-17	2.43314e-17	2.35969e-17	0.364019
FALSE	High	Master Protein	A6NDB9	Paralemmin-3 [OS=Homo sapiens]	0	17.696	11	4	10	4	673	71.7	4.53	17.08	4	development;metabolic process	cytoplasm;cytoskeleton;nucleus	structural molecule activity	Pf03285	342979	ENSG00000187867; ENSG00000288318	PALM3	A6NDB9; hsa:342979			0	0	100	100	100	0.906	0.787	0.869	6.64	6.64	6.64	-0.14	-0.34	-0.2	1e-17	1e-17	1e-17	0.69418	0.632996	0.448595	2.25143e-17	2.43314e-17	2.35969e-17	0.971932
FALSE	High	Master Protein	Q9UPY3	Endoribonuclease Dicer [OS=Homo sapiens]	0	6.208	2	3	7	2	1922	218.5	5.68	7.61	3	cell growth;cell proliferation;cellular component movement;cellular homeostasis;defense response;development;metabolic process	cell surface;cytosol;extracellular;membrane;nucleus	RNA binding;structural molecule activity	Pf00271, Pf00636, Pf02170, Pf03368, Pf04851	23405	ENSG00000100697	DICER1	A7E2D3; B3KRG4; E0AD28; hsa:23405; O95943; Q9UPY3; Q9UQ02	MicroRNA (miRNA) biogenesis; Small interfering RNA (siRNA) biogenesis; tRNA-derived small RNA (tsRNA or tRNA-related fragment, tRF) biogenesis	miRNA biogenesis; exRNA mechanism of action and biogenesis; Hypoxia-mediated EMT and stemness; mRNA processing; Fragile X syndrome; Influence of laminopathies on Wnt signaling; Overlap between signal transduction pathways contributing to LMNA laminopathies	10	0	100	100	100	0.6	0.624	1.04	6.64	6.64	6.64	-0.74	-0.68	0.06	1e-17	1e-17	1e-17	0.59716	0.18947	0.673055	2.25143e-17	2.43314e-17	2.35969e-17	0.948043
FALSE	High	Master Protein	Q96T60	Bifunctional polynucleotide phosphatase/kinase [OS=Homo sapiens]	0	25.215	25	6	25	6	521	57	8.46	36.25	6	cell proliferation;cellular homeostasis;coagulation;metabolic process	endosome;membrane;nucleus	RNA binding;signal transducer activity;structural molecule activity	Pf08645, Pf13671, Pf17913	11284	ENSG00000039650	PNKP	hsa:11284; Q96T60; Q9BUL2; Q9P1V2; Q9UKU8; Q9UNF8; Q9UNI0	APEX1-Independent Resolution of AP Sites via the Single Nucleotide Replacement Pathway	Base excision repair; DNA repair pathways, full network	3	0	100	100	100	0.699	1.081	1.546	6.64	6.64	6.64	-0.52	0.11	0.63	1e-17	1e-17	1e-17	0.807576	0.700441	0.5029	2.25143e-17	2.43314e-17	2.35969e-17	0.985798
FALSE	High	Master Protein	Q9UHB6	LIM domain and actin-binding protein 1 [OS=Homo sapiens]	0	68.259	25	13	77	13	759	85.2	6.84	182.06	13	cell growth;cellular homeostasis;conjugation;metabolic process	cytoplasm;cytoskeleton;cytosol;endoplasmic reticulum;nucleus	motor activity;structural molecule activity	Pf00412	51474	ENSG00000050405	LIMA1	B2RB09; hsa:51474; Q2TAN7; Q59FE8; Q9BVF2; Q9H8J1; Q9HBN5; Q9NX96; Q9NXC3; Q9NXU6; Q9P0H8; Q9UHB5; Q9UHB6			0	0	100	100	100	1.198	0.93	0.777	6.64	6.64	6.64	0.26	-0.1	-0.36	1e-17	1e-17	1e-17	0.286977	0.923027	0.224364	2.25143e-17	2.43314e-17	2.35969e-17	0.76251
FALSE	Medium	Master Protein	Q9BVV7	Mitochondrial import inner membrane translocase subunit Tim21 [OS=Homo sapiens]	0.026	1.875	4	1	1	1	248	28.2	9.7	1.73	1	cell growth;conjugation	cytoskeleton;endosome		Pf08294	29090	ENSG00000075336	TIMM21	hsa:29090; Q9BVV7; Q9P010	Mitochondrial protein import		1	0	100	100	100	0.543	0.704	1.296	6.64	6.64	6.64	-0.88	-0.51	0.37	1e-17	1e-17	1e-17	0.475237	0.311754	0.952605	2.25143e-17	2.43314e-17	2.35969e-17	0.897532
FALSE	High	Master Protein	Q8N0U8	Vitamin K epoxide reductase complex subunit 1-like protein 1 [OS=Homo sapiens]	0.002	3.666	6	1	9	1	176	19.8	9.13	22.64	1	cell organization and biogenesis;cellular homeostasis;coagulation	cytoskeleton;extracellular	structural molecule activity	Pf07884	154807	ENSG00000196715	VKORC1L1	B4E222; E7ETM5; hsa:154807; Q6AHW9; Q6TEK6; Q8N0U8	Metabolism of vitamin K		1	0	100	100	100	1.032	0.919	0.891	6.64	6.64	6.64	0.05	-0.12	-0.17	1e-17	1e-17	1e-17	0.541438	0.852814	0.422688	2.25143e-17	2.43314e-17	2.35969e-17	0.932289
FALSE	High	Master Protein	Q9BRF8	Serine/threonine-protein phosphatase CPPED1 [OS=Homo sapiens]	0	13.321	16	3	12	3	314	35.5	6.2	18.11	3	cell organization and biogenesis;cellular homeostasis	cell surface;cytoplasm;cytoskeleton;cytosol;mitochondrion	structural molecule activity	Pf00149	55313	ENSG00000103381	CPPED1	B4DQ68; hsa:55313; Q6MZY9; Q9BRF8; Q9H9M9; Q9NUT6	Neutrophil degranulation		1	0	100	100	100	0.994	1.258	1.266	6.64	6.64	6.64	-0.01	0.33	0.34	1e-17	1e-17	1e-17	0.604816	0.35875	0.845291	2.25143e-17	2.43314e-17	2.35969e-17	0.950297
FALSE	High	Master Protein	Q16322	Potassium voltage-gated channel subfamily A member 10 [OS=Homo sapiens]	0.006	2.855	2	1	2	1	511	57.7	4.93	6.03	1	cell growth;conjugation;metabolic process	cytoplasm;cytoskeleton	catalytic activity	Pf00520, Pf02214	3744	ENSG00000143105	KCNA10	hsa:3744; Q16322	Voltage gated Potassium channels		1	0	0.01	0.079	0.08	13.122	13.224	1.008	-6.64	-3.66	-3.65	3.71	3.73	0.01	1e-17	6.20441e-07	8.61362e-08	3.14334e-09	2.66454e-15	0.698769	2.25143e-17	1.44574e-06	1.96354e-07	3.90479e-08
FALSE	High	Master Protein	Q13685	Angio-associated migratory cell protein [OS=Homo sapiens]	0	14.181	6	2	7	2	434	46.7	4.42	21.38	2	defense response;metabolic process	cell surface;cytoplasm;cytoskeleton;cytosol;endoplasmic reticulum;nucleus	structural molecule activity	Pf00400	14	ENSG00000127837	AAMP	hsa:14; Q13685; Q8WUJ9; Q96H92	NOD1/2 Signaling Pathway; Thromboxane signalling through TP receptor; Signaling by EGFR; Signaling by VEGF	Nucleotide-binding oligomerization domain (NOD) pathway	5	0	100	100	100	0.074	1.47	19.962	6.64	6.64	6.64	-3.76	0.56	4.32	1e-17	1e-17	1e-17	2.464e-06	0.152097	1.40088e-12	2.25143e-17	2.43314e-17	2.35969e-17	2.74533e-05
FALSE	High	Master Protein	Q9H7F0	Polyamine-transporting ATPase 13A3 [OS=Homo sapiens]	0.006	2.788	2	1	4	1	1226	138	6.64	4.23	1	conjugation;metabolic process	cytoskeleton;mitochondrion	catalytic activity;structural molecule activity	Pf00122, Pf00689, Pf00690, Pf00702, Pf12409	79572	ENSG00000133657	ATP13A3	hsa:79572; Q8NC11; Q96KS1; Q9H7F0			0	0	100		100	0.01	0.649	100	6.64		6.64	-6.64	-0.62	6.64	1e-17		1e-17	1e-17	0.233375	1e-17	2.25143e-17		2.35969e-17	1.33839e-16
FALSE	High	Master Protein	P61966	AP-1 complex subunit sigma-1A [OS=Homo sapiens]	0	7.832	23	3	11	3	158	18.7	5.73	7.9	3	conjugation;metabolic process	cytoplasm;cytoskeleton;cytosol;extracellular;mitochondrion;nucleus	structural molecule activity	Pf01217	1174	ENSG00000106367	AP1S1	B2R5D8; hsa:1174; P61966; P82267; Q00382; Q53YA7; Q9BTN4; Q9UDW9	MHC class II antigen presentation; Golgi Associated Vesicle Biogenesis; Lysosome Vesicle Biogenesis; Nef mediated downregulation of MHC class I complex cell surface expression		4	0	100	100	100	0.938	0.76	0.81	6.64	6.64	6.64	-0.09	-0.4	-0.3	1e-17	1e-17	1e-17	0.687367	0.453025	0.299697	2.25143e-17	2.43314e-17	2.35969e-17	0.971932
FALSE	High	Master Protein	Q9Y2R9	28S ribosomal protein S7, mitochondrial [OS=Homo sapiens]	0	5.954	10	2	3	2	242	28.1	9.99	7.46	2	cell growth;cell organization and biogenesis;cellular homeostasis	cytoskeleton;endosome;Golgi	RNA binding;structural molecule activity	Pf00177	51081	ENSG00000125445	MRPS7	B2R9N5; hsa:51081; Q53GD6; Q9Y2R9	Mitochondrial translation initiation; Mitochondrial translation elongation; Mitochondrial translation termination		3	0	100	100	100	0.238	0.82	3.448	6.64	6.64	6.64	-2.07	-0.29	1.79	1e-17	1e-17	1e-17	0.00560929	0.578729	0.00789003	2.25143e-17	2.43314e-17	2.35969e-17	0.0449055
FALSE	High	Master Protein	Q7Z5K2	Wings apart-like protein homolog [OS=Homo sapiens]	0.004	3.059	2	1	2	1	1190	132.9	5.44	2.27	1	cell differentiation;metabolic process	cell surface;cytosol;endoplasmic reticulum;extracellular;membrane;nucleus		Pf07814	23063	ENSG00000062650	WAPL	A7E2B5; hsa:23063; Q5VSK5; Q7Z5K2; Q8IX10; Q92549	Separation of Sister Chromatids; Resolution of Sister Chromatid Cohesion; Establishment of Sister Chromatid Cohesion; Cohesin Loading onto Chromatin	Cohesin complex - Cornelia de Lange syndrome	5	0	100	100	100	0.501	0.919	1.833	6.64	6.64	6.64	-1	-0.12	0.87	1e-17	1e-17	1e-17	0.555458	0.886881	0.497374	2.25143e-17	2.43314e-17	2.35969e-17	0.933971
FALSE	High	Master Protein	Q9H900	Protein zwilch homolog [OS=Homo sapiens]	0	9.46	8	4	4	4	591	67.2	6.27	2.67	4	cell differentiation;development;metabolic process	cytosol;nucleus		Pf09817	55055	ENSG00000174442	ZWILCH	B3KVB8; hsa:55055; Q6N049; Q8N404; Q96SY7; Q9H900; Q9NWG7	Separation of Sister Chromatids; Resolution of Sister Chromatid Cohesion; RHO GTPases Activate Formins; EML4 and NUDC in mitotic spindle formation; Amplification of signal from unattached kinetochores via a MAD2 inhibitory signal		6	0	100	100	100	0.456	1.062	2.328	6.64	6.64	6.64	-1.13	0.09	1.22	1e-17	1e-17	1e-17	0.407594	0.731809	0.213359	2.25143e-17	2.43314e-17	2.35969e-17	0.865139
FALSE	Medium	Master Protein	Q13444	Disintegrin and metalloproteinase domain-containing protein 15 [OS=Homo sapiens]	0.023	1.975	2	1	4	1	863	92.9	6.73	0	1	cell communication;cell growth;cell organization and biogenesis;cellular homeostasis;coagulation;defense response;development;metabolic process	cell surface;cytoplasm;cytoskeleton;endoplasmic reticulum;nucleus	antioxidant activity;structural molecule activity	Pf00200, Pf01421, Pf01562, Pf08516	8751	ENSG00000143537	ADAM15	B3KQU5; B4DLB5; B4DMH8; E9PN65; hsa:8751; Q13444; Q13493; Q53XQ0; Q5SR68; Q5SR69; Q6R267; Q71S61; Q71S62; Q71S63; Q71S64; Q71S65; Q71S66; Q71S67; Q71S68; Q71S69; Q96C78; U3KQL5	Degradation of the extracellular matrix; Invadopodia formation		2	0	100	100	100	0.875	0.773	0.884	6.64	6.64	6.64	-0.19	-0.37	-0.18	1e-17	1e-17	1e-17	0.695206	0.539664	0.398864	2.25143e-17	2.43314e-17	2.35969e-17	0.972298
FALSE	Low	Master Protein	Q8N264	Rho GTPase-activating protein 24 [OS=Homo sapiens]	0.054	1.553	2	1	1	1	748	84.2	6.67	0	1	coagulation;defense response;development;metabolic process	endoplasmic reticulum;nucleus	DNA binding	Pf00169, Pf00620	83478	ENSG00000138639	ARHGAP24	hsa:83478; Q4KMG1; Q6ZNV3; Q86TI5; Q86WE4; Q8N264; Q9H0T6	RHOA GTPase cycle; CDC42 GTPase cycle; RAC1 GTPase cycle	Nephrotic syndrome	4	0	100	100	100	0.463	0.717	1.55	6.64	6.64	6.64	-1.11	-0.48	0.63	1e-17	1e-17	1e-17	0.373218	0.399371	0.722995	2.25143e-17	2.43314e-17	2.35969e-17	0.840932
FALSE	High	Master Protein	Q9BXB5	Oxysterol-binding protein-related protein 10 [OS=Homo sapiens]	0	16.177	11	5	25	5	764	83.9	8.31	28.2	5	cellular homeostasis;conjugation	cytoskeleton;cytosol;endoplasmic reticulum;nucleus	catalytic activity;structural molecule activity	Pf01237, Pf15409	114884	ENSG00000144645	OSBPL10	B4E212; hsa:114884; Q9BTU5; Q9BXB5	Acyl chain remodelling of PS		1	0	100	100	100	0.86	0.862	1.002	6.64	6.64	6.64	-0.22	-0.21	0	1e-17	1e-17	1e-17	0.856183	0.70373	0.687452	2.25143e-17	2.43314e-17	2.35969e-17	0.985798
FALSE	High	Master Protein	Q9BTW9	Tubulin-specific chaperone D [OS=Homo sapiens]	0	21.694	9	6	20	6	1192	132.5	6.19	29.08	6	cell differentiation;cell growth;defense response;metabolic process	cytoplasm;cytoskeleton;endoplasmic reticulum;nucleus	DNA binding;motor activity;structural molecule activity	Pf12612	6904	ENSG00000141556	TBCD	hsa:6904; O95458; Q7L8K1; Q8IXP6; Q8NAX0; Q8WYH4; Q96E74; Q9BTW9; Q9UF82; Q9UG46; Q9Y2J3	Post-chaperonin tubulin folding pathway		1	0	100	100	100	0.458	0.881	1.924	6.64	6.64	6.64	-1.13	-0.18	0.94	1e-17	1e-17	1e-17	0.289907	0.781613	0.286818	2.25143e-17	2.43314e-17	2.35969e-17	0.76512
FALSE	High	Master Protein	Q96QF0	Rab-3A-interacting protein [OS=Homo sapiens]	0.007	2.631	6	1	5	1	476	53	5.97	0	1	cell growth;conjugation;metabolic process	cytosol;endoplasmic reticulum;extracellular;membrane;nucleus	DNA binding;structural molecule activity	Pf06428	117177	ENSG00000127328	RAB3IP	B7WPJ6; hsa:117177; Q6PCE4; Q96A24; Q96QE6; Q96QE7; Q96QE8; Q96QE9; Q96QF0; Q96QF1; Q9H673	RAB GEFs exchange GTP for GDP on RABs; VxPx cargo-targeting to cilium; Anchoring of the basal body to the plasma membrane; BBSome-mediated cargo-targeting to cilium	Joubert syndrome	5	0	100	100	100	0.6	0.984	1.64	6.64	6.64	6.64	-0.74	-0.02	0.71	1e-17	1e-17	1e-17	0.770297	0.910656	0.663503	2.25143e-17	2.43314e-17	2.35969e-17	0.983441
FALSE	High	Master Protein	P54725	UV excision repair protein RAD23 homolog A [OS=Homo sapiens]	0	23.578	26	5	33	3	363	39.6	4.58	81.16	5	cell organization and biogenesis;cell proliferation;cellular homeostasis;coagulation;metabolic process	cytosol;endoplasmic reticulum;membrane;nucleus	RNA binding;structural molecule activity	Pf00240, Pf00627, Pf09280	5886	ENSG00000179262	RAD23A	hsa:5886; K7ESE3; P54725; Q59EU8; Q5M7Z1	Formation of Incision Complex in GG-NER; DNA Damage Recognition in GG-NER; Josephin domain DUBs	Nucleotide excision repair; DNA repair pathways, full network; Nucleotide excision repair in xeroderma pigmentosum	6	0	100	100	100	0.817	0.853	1.043	6.64	6.64	6.64	-0.29	-0.23	0.06	1e-17	1e-17	1e-17	0.88359	0.624247	0.596175	2.25143e-17	2.43314e-17	2.35969e-17	0.98921
FALSE	High	Master Protein	P19013	Keratin, type II cytoskeletal 4 [OS=Homo sapiens]	0	27.005	10	6	48	1	520	56.1	6.61	132.16	6	cell growth;metabolic process	cytosol;endoplasmic reticulum;nucleus		Pf00038, Pf16208	3851	ENSG00000170477	KRT4	B4DRS2; F8VS64; hsa:3851; P19013; Q6GTR8; Q96LA7; Q9BTL1	Formation of the cornified envelope		2	0	100	100	100	0.945	1.07	1.132	6.64	6.64	6.64	-0.08	0.1	0.18	1e-17	1e-17	1e-17	0.667769	0.78298	0.830236	2.25143e-17	2.43314e-17	2.35969e-17	0.969039
FALSE	High	Master Protein	P57735	Ras-related protein Rab-25 [OS=Homo sapiens]	0	15.305	17	3	14	2	213	23.5	5.96	33.42	3	cell growth;conjugation;metabolic process	cytoplasm;cytoskeleton;mitochondrion;nucleus	motor activity;structural molecule activity	Pf00071	57111	ENSG00000132698	RAB25	hsa:57111; P57735; Q5VYA2; Q8NG24; Q96GB1; Q9BT12	RAB geranylgeranylation	Intracellular trafficking proteins involved in CMT neuropathy	2	0	100	100	100	2.023	0.979	0.484	6.64	6.64	6.64	1.02	-0.03	-1.05	1e-17	1e-17	1e-17	0.0424802	0.96837	0.019064	2.25143e-17	2.43314e-17	2.35969e-17	0.247496
FALSE	High	Master Protein	O75152	Zinc finger CCCH domain-containing protein 11A [OS=Homo sapiens]	0	18.532	8	5	21	5	810	89.1	8.37	37.64	5	cellular homeostasis;conjugation	membrane	RNA binding;structural molecule activity	Pf15663	9877	ENSG00000058673	ZC3H11A	hsa:9877; O75152; Q6AHY4; Q6AHY9; Q6AW79; Q6AWA1; Q6PJK4; Q86XZ7	Transport of Mature mRNA derived from an Intron-Containing Transcript; mRNA 3'-end processing; RNA Polymerase II Transcription Termination		3	0	100	100	100	0.932	1.194	1.282	6.64	6.64	6.64	-0.1	0.26	0.36	1e-17	1e-17	1e-17	0.778687	0.43847	0.764149	2.25143e-17	2.43314e-17	2.35969e-17	0.983529
FALSE	High	Master Protein	Q9NPL8	Complex I assembly factor TIMMDC1, mitochondrial [OS=Homo sapiens]	0	21.564	28	4	8	4	285	32.2	8.5	19.95	4		cytoskeleton;endosome;membrane		Pf02466	51300	ENSG00000113845	TIMMDC1	D3DN81; hsa:51300; Q6IAJ7; Q6UWU6; Q9NPL8; Q9NPR3; Q9NPS5; Q9P0Y6	Complex I biogenesis		1	0	100	100	100	0.332	0.617	1.86	6.64	6.64	6.64	-1.59	-0.7	0.9	1e-17	1e-17	1e-17	0.109017	0.177365	0.427694	2.25143e-17	2.43314e-17	2.35969e-17	0.46262
FALSE	High	Master Protein	P05187	Alkaline phosphatase, placental type [OS=Homo sapiens]	0	19.469	20	5	12	2	535	57.9	6.29	20.9	5	cellular homeostasis	cytoplasm;cytoskeleton;nucleus	structural molecule activity	Pf00245	250	ENSG00000163283	ALPP	hsa:250; P05187; P05188; P06861; Q53S78; Q96DB7	Intra-Golgi traffic	Orexin receptor pathway	2	3	100	100	100	4.306	2.072	0.481	6.64	6.64	6.64	2.11	1.05	-1.06	1e-17	1e-17	1e-17	0.000129865	0.0223751	0.0188463	2.25143e-17	2.43314e-17	2.35969e-17	0.00131785
FALSE	High	Master Protein	O14972	Vacuolar protein sorting-associated protein 26C [OS=Homo sapiens]	0	5.998	8	2	11	2	297	33	7.68	17.5	2	conjugation	mitochondrion		Pf03643	10311	ENSG00000157538	VPS26C	B2R6T8; B7Z6B1; D3DSH4; hsa:10311; O14972; Q2TAY6			0	0	100	100	100	0.462	0.973	2.108	6.64	6.64	6.64	-1.11	-0.04	1.08	1e-17	1e-17	1e-17	0.332908	0.973598	0.268745	2.25143e-17	2.43314e-17	2.35969e-17	0.808064
FALSE	High	Master Protein	Q14118	Dystroglycan [OS=Homo sapiens]	0	14.919	11	5	14	5	895	97.4	8.56	13.96	5	cell communication;cell death;cell growth;cell organization and biogenesis;coagulation;defense response;metabolic process	cell surface;chromosome;cytoplasm;cytoskeleton;cytosol;endoplasmic reticulum;extracellular;membrane;nucleus	motor activity;structural molecule activity	Pf05345, Pf05454, Pf18424	1605	ENSG00000173402	DAG1	A8K6M7; hsa:1605; Q14118; Q969J9	Regulation of expression of SLITs and ROBOs; ECM proteoglycans; Non-integrin membrane-ECM interactions; O-linked glycosylation; EGR2 and SOX10-mediated initiation of Schwann cell myelination; Defective POMGNT1 causes MDDGA3, MDDGB3 and MDDGC3; Defective POMT2 causes MDDGA2, MDDGB2 and MDDGC2; Defective POMT1 causes MDDGA1, MDDGB1 and MDDGC1	Arrhythmogenic right ventricular cardiomyopathy; Primary focal segmental glomerulosclerosis (FSGS); Acute viral myocarditis; Fragile X syndrome	12	0	100	100	100	51.894	19.434	0.374	6.64	6.64	6.64	5.7	4.28	-1.42	1e-17	1e-17	1e-17	1e-17	1e-17	0.00247098	2.25143e-17	2.43314e-17	2.35969e-17	1.33839e-16
FALSE	High	Master Protein	O43823	A-kinase anchor protein 8 [OS=Homo sapiens]	0	7.024	4	2	7	2	692	76.1	5.15	19.87	2	cell differentiation;cell growth;coagulation;conjugation;development;metabolic process	endosome;extracellular;membrane;nucleus	RNA binding;structural molecule activity	Pf04988	10270	ENSG00000105127	AKAP8	hsa:10270; O43823		G protein signaling pathways	1	0	100	100	100	0.154	0.135	0.876	6.64	6.64	6.64	-2.7	-2.89	-0.19	1e-17	1e-17	1e-17	0.00558096	4.90368e-08	0.356448	2.25143e-17	2.43314e-17	2.35969e-17	0.0448448
FALSE	High	Master Protein	Q69YN2	CWF19-like protein 1 [OS=Homo sapiens]	0.001	4.311	3	1	4	1	538	60.6	7.24	7.6	1	cellular component movement;cellular homeostasis	membrane	DNA binding	Pf04676, Pf04677	55280	ENSG00000095485	CWF19L1	B4DHX1; D3DR66; hsa:55280; Q5W0I3; Q69YN2; Q96HC3; Q9H865; Q9NV13			0	0	100	100	100	0.606	0.935	1.544	6.64	6.64	6.64	-0.72	-0.1	0.63	1e-17	1e-17	1e-17	0.662964	0.899726	0.637337	2.25143e-17	2.43314e-17	2.35969e-17	0.966783
FALSE	Medium	Master Protein	O43149	Zinc finger ZZ-type and EF-hand domain-containing protein 1 [OS=Homo sapiens]	0.016	2.193	1	1	2	1	2961	330.9	5.95	0	1			structural molecule activity	Pf00569, Pf03256	23140	ENSG00000074755	ZZEF1	A7MBM5; hsa:23140; O43149; Q6NXG0; Q6ZRA1; Q6ZSF4; Q9NVB9			0	0	100	100		0.644	0.01	0.01	6.64	6.64		-0.63	-6.64	-6.64	1e-17	1e-17		0.883376	1e-17	1e-17	2.25143e-17	2.43314e-17		0.98921
FALSE	High	Master Protein	Q9H074	Polyadenylate-binding protein-interacting protein 1 [OS=Homo sapiens]	0	24.578	23	5	23	5	479	53.5	4.81	53.58	5	cell organization and biogenesis;cellular homeostasis;metabolic process	cytosol;nucleus	RNA binding	Pf02854, Pf07145	10605	ENSG00000172239	PAIP1	A6NKV8; hsa:10605; O60455; Q96B61; Q9BS63; Q9H074	Deadenylation of mRNA	Translation factors	2	0	100	100	100	0.948	1.066	1.124	6.64	6.64	6.64	-0.08	0.09	0.17	1e-17	1e-17	1e-17	0.820384	0.716358	0.976359	2.25143e-17	2.43314e-17	2.35969e-17	0.985798
FALSE	High	Master Protein	Q9Y3D9	28S ribosomal protein S23, mitochondrial [OS=Homo sapiens]	0	9.061	11	2	9	2	190	21.8	8.9	25.46	2	cell organization and biogenesis;cellular homeostasis	cytoskeleton;endosome;Golgi;membrane	structural molecule activity	Pf10484	51649	ENSG00000181610	MRPS23	B2R6V3; hsa:51649; Q96Q24; Q9BWH8; Q9P053; Q9Y3D9	Mitochondrial translation initiation; Mitochondrial translation elongation; Mitochondrial translation termination		3	0	100	100	100	0.643	0.848	1.319	6.64	6.64	6.64	-0.64	-0.24	0.4	1e-17	1e-17	1e-17	0.60343	0.707649	0.755032	2.25143e-17	2.43314e-17	2.35969e-17	0.950297
FALSE	High	Master Protein	Q2VPK5	Cytoplasmic tRNA 2-thiolation protein 2 [OS=Homo sapiens]	0	9.647	9	2	7	2	515	56.1	6.32	3.55	2	cell organization and biogenesis;cellular component movement;cellular homeostasis	cytosol;nucleus	RNA binding;structural molecule activity	Pf10288	348180	ENSG00000174177	CTU2	B2RXK0; hsa:348180; Q0P511; Q2VPK5; Q66K78; Q6P4C8; Q86SV4	tRNA modification in the nucleus and cytosol		1	0	100	100	100	1.23	1.338	1.088	6.64	6.64	6.64	0.3	0.42	0.12	1e-17	1e-17	1e-17	0.319763	0.320133	0.630779	2.25143e-17	2.43314e-17	2.35969e-17	0.794903
FALSE	High	Master Protein	O95639	Cleavage and polyadenylation specificity factor subunit 4 [OS=Homo sapiens]	0.001	4.372	8	1	3	1	269	30.2	8.31	7.53	1	cellular component movement;cellular homeostasis	membrane;nucleus	RNA binding;structural molecule activity	Pf00098, Pf00642, Pf15663	10898	ENSG00000160917	CPSF4	D6W5S8; hsa:10898; O95639; Q6FGE6; Q86TF8; Q9BTW6	mRNA Splicing - Major Pathway; tRNA processing in the nucleus; Transport of Mature mRNA Derived from an Intronless Transcript; mRNA 3'-end processing; RNA Polymerase II Transcription Termination; Processing of Intronless Pre-mRNAs; Inhibition of Host mRNA Processing and RNA Silencing	mRNA processing	8	0	100		100	0.01	0.913	100	6.64		6.64	-6.64	-0.13	6.64	1e-17		1e-17	1e-17	0.858163	1e-17	2.25143e-17		2.35969e-17	1.33839e-16
FALSE	High	Master Protein	Q13573	SNW domain-containing protein 1 [OS=Homo sapiens]	0	28.728	18	7	35	7	536	61.5	9.52	63.85	7	cell differentiation;cellular component movement;cellular homeostasis;coagulation;defense response;development;metabolic process	membrane;nucleus	antioxidant activity;structural molecule activity	Pf02731	22938	ENSG00000100603	SNW1	A8K8A9; hsa:22938; Q13483; Q13573; Q32N03; Q5D0D6	mRNA Splicing - Major Pathway; Pre-NOTCH Transcription and Translation; Constitutive Signaling by NOTCH1 PEST Domain Mutants; Constitutive Signaling by NOTCH1 HD+PEST Domain Mutants; NOTCH1 Intracellular Domain Regulates Transcription; Notch-HLH transcription pathway; Downregulation of SMAD2/3:SMAD4 transcriptional activity; NOTCH4 Intracellular Domain Regulates Transcription; NOTCH3 Intracellula…	TGF-beta signaling pathway; Novel intracellular components of RIG-I-like receptor (RLR) pathway; Splicing factor NOVA regulated synaptic proteins; Notch signaling pathway	15	0	100	100	100	1.011	1.13	1.117	6.64	6.64	6.64	0.02	0.18	0.16	1e-17	1e-17	1e-17	0.687226	0.537296	0.979737	2.25143e-17	2.43314e-17	2.35969e-17	0.971932
FALSE	High	Master Protein	O00186	Syntaxin-binding protein 3 [OS=Homo sapiens]	0	8.053	7	3	6	3	592	67.7	7.8	12.63	3	cell communication;cell death;coagulation;conjugation;defense response;metabolic process	cytoplasm;cytoskeleton;cytosol;nucleus	structural molecule activity	Pf00995	6814	ENSG00000116266	STXBP3	A8K269; A8K5K7; hsa:6814; O00186; Q53FW1; Q86YJ3; Q9UPD7	Translocation of SLC2A4 (GLUT4) to the plasma membrane; Disinhibition of SNARE formation	Insulin signaling	3	0	100	100	100	1.141	1.024	0.897	6.64	6.64	6.64	0.19	0.03	-0.16	1e-17	1e-17	1e-17	0.402648	0.94347	0.35284	2.25143e-17	2.43314e-17	2.35969e-17	0.864632
FALSE	High	Master Protein	Q9P013	Spliceosome-associated protein CWC15 homolog [OS=Homo sapiens]	0	8.061	15	2	9	2	229	26.6	5.71	19.39	2	cellular component movement;cellular homeostasis	endosome;membrane	RNA binding	Pf04889	51503	ENSG00000150316	CWC15	B2RC17; hsa:51503; Q05BV9; Q05DM1; Q9P013; Q9UI29	mRNA Splicing - Major Pathway		1	0	100	100	100	1.162	1.293	1.113	6.64	6.64	6.64	0.22	0.37	0.15	1e-17	1e-17	1e-17	0.383176	0.328666	0.904356	2.25143e-17	2.43314e-17	2.35969e-17	0.849472
FALSE	High	Master Protein	O95674	Phosphatidate cytidylyltransferase 2 [OS=Homo sapiens]	0	6.183	12	3	5	3	445	51.4	7.09	1.94	3	cell growth;cellular homeostasis	cytoskeleton;endosome;extracellular	structural molecule activity	Pf01148	8760	ENSG00000101290	CDS2	B2RDC6; D3DW04; hsa:8760; O95674; Q5TDY2; Q5TDY3; Q5TDY4; Q5TDY5; Q9BYK5; Q9NTT2	Synthesis of PG		1	0	100	100	100	1.372	0.795	0.579	6.64	6.64	6.64	0.46	-0.33	-0.79	1e-17	1e-17	1e-17	0.22672	0.597381	0.105598	2.25143e-17	2.43314e-17	2.35969e-17	0.687962
FALSE	High	Master Protein	Q8IXQ4	GPALPP motifs-containing protein 1 [OS=Homo sapiens]	0.004	3.006	4	1	3	1	340	38.1	5.41	5.39	1				Pf12572	55425	ENSG00000133114	GPALPP1	A8K8X8; hsa:55425; Q05BX8; Q05D87; Q5T3Z3; Q5T3Z5; Q8IXQ4; Q9C0F9; Q9H2R0; Q9P0W6			0	0	100	100	100	1.127	0.85	0.754	6.64	6.64	6.64	0.17	-0.23	-0.41	1e-17	1e-17	1e-17	0.393545	0.788122	0.285831	2.25143e-17	2.43314e-17	2.35969e-17	0.858373
FALSE	High	Master Protein	O60437	Periplakin [OS=Homo sapiens]	0.009	2.528	1	1	3	1	1756	204.6	5.6	6.65	1	cell growth;coagulation;defense response;metabolic process	cytoplasm;cytoskeleton;cytosol;endoplasmic reticulum;nucleus	motor activity;structural molecule activity	Pf17902	5493	ENSG00000118898	PPL	hsa:5493; O60314; O60437; O60454; Q14C98	Formation of the cornified envelope; Butyrophilin (BTN) family interactions		2	0	100	100		1.652	0.01	0.01	6.64	6.64		0.72	-6.64	-6.64	1e-17	1e-17		0.121068	1e-17	1e-17	2.25143e-17	2.43314e-17		0.498446
FALSE	High	Master Protein	Q66K74	Microtubule-associated protein 1S [OS=Homo sapiens]	0	12.392	3	2	8	2	1059	112.1	7.3	23.94	2	cell growth;cell proliferation;cellular homeostasis;conjugation;defense response;metabolic process	cytosol;endoplasmic reticulum;membrane;nucleus	motor activity;RNA binding		55201	ENSG00000130479	MAP1S	B4DH53; hsa:55201; Q27QB1; Q66K74; Q6NXF1; Q8N3L8; Q8N3W5; Q8NI88; Q96H94; Q96IT4; Q96SP8; Q9BRC6; Q9H928; Q9NVK7			0	0	100	100	100	1.92	1.177	0.613	6.64	6.64	6.64	0.94	0.24	-0.71	1e-17	1e-17	1e-17	0.0718205	0.533683	0.104741	2.25143e-17	2.43314e-17	2.35969e-17	0.358135
FALSE	High	Master Protein	O75845	Lathosterol oxidase [OS=Homo sapiens]	0.002	3.301	2	1	9	1	299	35.3	8.07	9.35	1	cellular homeostasis	cytoskeleton;extracellular	structural molecule activity	Pf04116	6309	ENSG00000109929	SC5D	hsa:6309; O00119; O75845; Q6GTM5; Q9UK15	Activation of gene expression by SREBF (SREBP); Cholesterol biosynthesis via desmosterol; Cholesterol biosynthesis via lathosterol	Cholesterol biosynthesis pathway; Cholesterol metabolism with Bloch and Kandutsch-Russell pathways; Cholesterol biosynthesis with skeletal dysplasias	6	0	100	100	100	1.391	0.983	0.707	6.64	6.64	6.64	0.48	-0.02	-0.5	1e-17	1e-17	1e-17	0.226158	0.893501	0.249344	2.25143e-17	2.43314e-17	2.35969e-17	0.687525
FALSE	Medium	Master Protein	Q96ET8	Golgi apparatus membrane protein TVP23 homolog C [OS=Homo sapiens]	0.014	2.239	10	1	4	1	276	31.1	9.29	0	1	conjugation	cytoskeleton;extracellular		Pf05832	100533496; 201158	ENSG00000175106	TVP23C	hsa:100533496; hsa:201158; Q3LIC7; Q96ET8			0	0	100	100		0.981	0.01	0.01	6.64	6.64		-0.03	-6.64	-6.64	1e-17	1e-17		0.550117	1e-17	1e-17	2.25143e-17	2.43314e-17		0.932719
FALSE	High	Master Protein	P41240	Tyrosine-protein kinase CSK [OS=Homo sapiens]	0	6.815	8	3	4	3	450	50.7	7.06	2.24	3	cell growth;cell organization and biogenesis;cellular homeostasis;defense response;development;metabolic process	cytoplasm;cytoskeleton;cytosol;nucleus	signal transducer activity;structural molecule activity	Pf00017, Pf00018, Pf07714	1445	ENSG00000103653	CSK	hsa:1445; P41240; Q2M3N2; Q6FGZ6	Signaling by BRAF and RAF1 fusions; Negative regulation of FLT3; GAB1 signalosome; Integrin signaling; Signaling by moderate kinase activity BRAF mutants; Paradoxical activation of RAF signaling by kinase inactive BRAF; Signaling downstream of RAS mutants; Signaling by RAF1 mutants; MAP2K and MAPK activation; Signaling by high-kinase activity BRAF mutants; RHOH GTPase cycle; Phosphorylation of CD…	Integrin-mediated cell adhesion; VEGFA-VEGFR2 signaling pathway; Chemokine signaling pathway; EGF/EGFR signaling pathway; Regulation of actin cytoskeleton	18	0	100	100	100	0.82	1.243	1.516	6.64	6.64	6.64	-0.29	0.31	0.6	1e-17	1e-17	1e-17	0.90581	0.509416	0.670979	2.25143e-17	2.43314e-17	2.35969e-17	0.992849
FALSE	High	Master Protein	Q9Y316	Protein MEMO1 [OS=Homo sapiens]	0	7.347	10	2	6	2	297	33.7	7.14	9.85	2	metabolic process			Pf01875	51072	ENSG00000162959	MEMO1	B4DLS0; D6W575; hsa:51072; Q5R2V8; Q5R2V9; Q6NSL5; Q9Y316	ERBB2 Regulates Cell Motility		1	0	100	100	100	1.268	1.617	1.275	6.64	6.64	6.64	0.34	0.69	0.35	1e-17	1e-17	1e-17	0.307399	0.100576	0.838865	2.25143e-17	2.43314e-17	2.35969e-17	0.78354
FALSE	High	Master Protein	Q9Y3L5	Ras-related protein Rap-2c [OS=Homo sapiens]	0	28.413	31	5	29	3	183	20.7	4.94	62.18	5	development;metabolic process	cytoplasm;cytoskeleton;cytosol;mitochondrion;nucleus	structural molecule activity	Pf00071	57826	ENSG00000123728	RAP2C	B3KWD6; hsa:57826; Q5H9H9; Q9BTS0; Q9Y3L5	Neutrophil degranulation		1	0	100	100	100	0.418	0.647	1.549	6.64	6.64	6.64	-1.26	-0.63	0.63	1e-17	1e-17	1e-17	0.139303	0.185286	0.552128	2.25143e-17	2.43314e-17	2.35969e-17	0.54705
[truncated: 3,410 more rows]
[truncated: 82 more columns]
